## Highlights

1

### **A mathematical framework for evo-devo dynamics**

2

Mauricio González-Forero

3

- We formulate a framework integrating evolutionary and developmental dynamics. 4
- We derive equations describing the evolutionary dynamics of traits considering their developmental process. 5
- This yields a description of the evo-devo process in terms of closed-form formulas that are simple and insightful, including for genetic covariance matrices. 6  
7

## A mathematical framework for evo-devo dynamics

Mauricio González-Forero<sup>a,\*</sup>

<sup>a</sup>*School of Biology, University of St Andrews, Dyers Brae, St Andrews, KY16 9TH, Fife, UK*

---

### Abstract

Natural selection acts on phenotypes constructed over development, which raises the question of how development affects evolution. Classic evolutionary theory indicates that development affects evolution by modulating the genetic covariation upon which selection acts, thus affecting genetic constraints. However, whether genetic constraints are relative, thus diverting adaptation from the direction of steepest fitness ascent, or absolute, thus blocking adaptation in certain directions, remains uncertain. This limits understanding of long-term evolution of developmentally constructed phenotypes. Here we formulate a general tractable mathematical framework that integrates age progression, explicit development (i.e., the construction of the phenotype across life subject to developmental constraints), and evolutionary dynamics, thus describing the evolutionary developmental (evo-devo) dynamics. The framework yields simple equations that can be arranged in a layered structure that we call the evo-devo process, whereby five core elementary components generate all equations including those mechanistically describing genetic covariation and the evo-devo dynamics. The framework recovers evolutionary dynamic equations in gradient form and describes the evolution of genetic covariation from the evolution of genotype, phenotype, environment, and mutational covariation. This shows that genotypic and phenotypic evolution must be followed simultaneously to yield a dynamically sufficient description of long-term phenotypic evolution in gradient form, such that evolution described as the climbing of a fitness landscape occurs in “geno-phenotype” space. Genetic constraints in geno-phenotype space are necessarily absolute because the phenotype is related to the genotype by development. Thus, the long-term evolutionary dynamics of developed phenotypes is strongly non-standard: (1) evolutionary equilibria are either absent or infinite in number and depend on genetic covariation and hence on development; (2) developmental constraints determine the admissible evolutionary path and hence which evolutionary equilibria are admissible; and (3) evolutionary outcomes occur at admissible evolutionary equilibria, which do not generally occur at fitness landscape peaks in geno-phenotype space, but at peaks in the admissible evolutionary path where “total genotypic selection” vanishes if exogenous plastic response vanishes and mutational variation exists in all directions of genotype space. Hence, selection and development jointly define the evolutionary outcomes if absolute mutational constraints and exogenous plastic response are absent, rather than the outcomes being defined only by selection. Moreover, our framework provides formulas for the sensitivities of a recurrence and an alternative method to dynamic optimization (i.e., dynamic programming or optimal control) to identify evolutionary outcomes in models with developmentally dynamic traits. These results show that development has major evolutionary effects.

*Keywords:*

evolutionary dynamics, developmental constraints, genetic constraints, life-history theory, matrix population models, adaptive dynamics

## 1. Introduction

Development may be defined as the process that constructs the phenotype over life (Barresi and Gilbert, 2020). In particular, development includes “the process by which genotypes are transformed into phenotypes” (Wolf et al., 2001). As natural selection screens phenotypes produced by development, a fundamental evolutionary problem concerns how development affects evolution. Interest in this problem is long-standing (Baldwin 1896, Waddington 1959 p. 399, and Gould and Lewontin 1979) and has steadily increased in recent decades. It has been proposed that developmental constraints (Gould and Lewontin, 1979; Maynard Smith et al., 1985; Brakefield, 2006; Klingenberg, 2010), causal feedbacks over development occurring among genes, the organism, and environment (Lewontin, 1983; Rice, 2011; Hansen, 2013; Laland et al., 2015), and various development-mediated factors (Laland et al., 2014, 2015), namely plasticity (Pigliucci, 2001; West-Eberhard, 2003), niche construction (Odling-Smee et al., 1996, 2003), extra-genetic inheritance (Baldwin, 1896; Cavalli-Sforza and Feldman, 1981; Boyd and Richerson, 1985; Jablonka and Lamb, 2014; Bonduriansky and Day, 2018), and developmental bias (Arthur, 2004; Uller et al., 2018), may all have important evolutionary roles. Understanding how development — including these elements acting individually and together — affects the evolutionary process remains an outstanding challenge (Baldwin, 1896; Waddington, 1959; Müller, 2007; Pigliucci, 2007; Laland et al., 2014, 2015; Galis et al., 2018).

Classic evolutionary theory indicates that development affects evolution by modulating the genetic covariation upon which selection acts. This can be seen as follows. In quantitative genetics, an individual’s  $i$ -th trait value  $x_i$  is written as  $x_i = \bar{x}_i + \sum_j \alpha_{ij}(y_j - \bar{y}_j) + e_i$ , where the overbar denotes population average,  $y_j$  is the individual’s gene content at the  $j$ -th locus,  $\alpha_{ij}$  is the partial regression coefficient of the  $i$ -th trait deviation from the average on the deviation from the average of the  $j$ -th locus content, and  $e_i$  is the residual error (Fisher, 1918; Crow and Kimura, 1970; Falconer and Mackay, 1996; Lynch and Walsh, 1998; Walsh and Lynch, 2018). The quantity  $\alpha_{ij}$  is Fisher’s additive effect of allelic substitution (his  $\alpha$ ; see Eq. I of Fisher 1918 and p. 72 of Lynch and Walsh 1998) and is a description of some of the linear effects of development, specifically of how genotypes are transformed into phenotypes. In matrix notation, the vector of an individual’s trait values is  $\mathbf{x} = \bar{\mathbf{x}} + \boldsymbol{\alpha}(\mathbf{y} - \bar{\mathbf{y}}) + \mathbf{e}$ , where the matrix  $\boldsymbol{\alpha}$  corresponds to what Wagner (1984) calls the developmental matrix (his  $\mathbf{B}$ ). The breeding value of the multivariate phenotype  $\mathbf{x}$  is defined as  $\mathbf{a}_x \equiv \bar{\mathbf{x}} + \boldsymbol{\alpha}(\mathbf{y} - \bar{\mathbf{y}})$ , which does not consider the error term that includes non-linear effects of genes on phenotype. Breeding value thus depends on development via the developmental matrix  $\boldsymbol{\alpha}$ . The Lande (1979) equation describes

---

\*Corresponding author:

Email address: [mgf3@st-andrews.ac.uk](mailto:mgf3@st-andrews.ac.uk) (Mauricio González-Forero)

41 the evolutionary change due to selection in the mean multivariate phenotype  $\bar{\mathbf{x}}$  as  $\Delta\bar{\mathbf{x}} = \mathbf{G}\partial \ln \bar{W}/\partial\bar{\mathbf{x}}$ , where the additive  
42 genetic covariance matrix is  $\mathbf{G} \equiv \text{cov}[\mathbf{a}_x, \mathbf{a}_x] = \alpha\text{cov}[\mathbf{y}, \mathbf{y}]\alpha^T$  (e.g., Wagner 1984), mean absolute fitness is  $\bar{W}$ , and the  
43 selection gradient is  $\partial \ln \bar{W}/\partial\bar{\mathbf{x}}$ , which points in the direction of steepest increase in mean fitness (here and throughout  
44 we use matrix calculus notation described in Appendix A). An important feature of the Lande equation is that it is  
45 in gradient form, so the equation shows that, within the assumptions made, phenotypic evolution by natural selection  
46 proceeds as the climbing of a fitness landscape, as first shown by Wright (1937) for change in allele frequencies in a  
47 two-allele single-locus model. Moreover, the Lande equation shows that additive genetic covariation, described by  $\mathbf{G}$ ,  
48 may divert evolutionary change from the direction of steepest fitness ascent, and may prevent evolutionary change in  
49 some directions if genetic variation in those directions is absent (in which case  $\mathbf{G}$  is singular). Since additive genetic  
50 covariation depends on development via the developmental matrix  $\alpha$ , the Lande equation shows that development  
51 affects evolution by modulating genetic covariation via  $\alpha$  (Charlesworth et al., 1982; Cheverud, 1984; Maynard Smith  
52 et al., 1985).

53 However, this mathematical description might have limited further insight into the evolutionary effects of devel-  
54 opment, particularly because it lacks two key pieces of information. First, the above description yields a limited  
55 understanding of the form of the developmental matrix  $\alpha$ . The definition of  $\alpha$  as a matrix of regression coefficients  
56 does not make available a developmentally explicit nor evolutionarily dynamic understanding of  $\alpha$ , which hinders un-  
57 derstanding of how development affects evolution. Although the developmental matrix  $\alpha$  has been modelled (Pavlicev  
58 and Hansen, 2011) or analysed as unknowable (Martin, 2014), there is a lack of a general theory with an explicit de-  
59 scription of the developmental process to unveil the general structure of the developmental matrix  $\alpha$ .

60 Second, the description in the second paragraph above gives a very short-term account of the evolutionary process.  
61 The Lande equation in the second paragraph strictly describes the evolution of mean traits  $\bar{\mathbf{x}}$  but not of mean gene  
62 content  $\bar{\mathbf{y}}$ , that is, it does not describe change in allele frequency; yet, since  $\alpha$  is a matrix of regression coefficients  
63 calculated for the current population,  $\alpha$  depends on the current state of the population including allele frequency  $\bar{\mathbf{y}}$ .  
64 Thus, the Lande equation above describes the dynamics of some traits  $\bar{\mathbf{x}}$  as an implicit function of traits  $\bar{\mathbf{y}}$  whose  
65 dynamics are not described. The equation thus contains fewer dynamic equations (as many as there are traits in  $\bar{\mathbf{x}}$ )  
66 than dynamic variables (as many as there are traits  $\bar{\mathbf{x}}$  and loci  $\bar{\mathbf{y}}$ ), so it is underdetermined. Consequently, the Lande  
67 equation strictly admits an infinite number of evolutionary trajectories for a given initial condition. Technically, the  
68 evolutionary trajectory is ill-defined by the Lande's system, so the Lande equation is dynamically insufficient (we  
69 note that these harsh-sounding terms do not mean that the Lande equation is wrong). The standard approach to this  
70 dynamic insufficiency is to assume Fisher's (1918) infinitesimal model, whereby there is an infinite number of loci  
71 such that allele frequency change per locus per generation is negligible (Bulmer, 1971, 1980; Turelli and Barton,  
72 1994; Barton et al., 2017; Hill, 2017). Thus, the Lande equation is said to describe short-term evolution, during which  
73 there is negligible allele frequency change per locus (Walsh and Lynch, 2018, pp. 504 and 879). The Lande equation  
74 is then supplemented by the Bulmer (1980) equation (Lande and Arnold, 1983, Eq. 12) which describes the dynamics  
75 of  $\mathbf{G}$  primarily due to change in linkage disequilibrium under the assumption of negligible allele frequency change,

thus still to describe short-term evolution (Walsh and Lynch, 2018, p. 553). Typically, the  $\mathbf{G}$  matrix is assumed to have reached an equilibrium in such short-term dynamics or to remain constant although this has often been shown not to hold theoretically (Turelli, 1988) and empirically (Björklund et al., 2013). An alternative to the long-term dynamic insufficiency of the classic Lande's system would be to consider the vector of gene content  $\mathbf{y}$  to be a subvector of the vector of trait values  $\mathbf{x}$  (Barfield et al., 2011), although such vector  $\mathbf{x}$  does not admit the normality assumption of the Lande equation and doing so does not yield a description of linkage disequilibrium dynamics. Indeed, there appears to be no formal derivation of such extended Lande's system that makes explicit the properties of its associated  $\mathbf{G}$ -matrix and the dependence of such matrix on development. Overall, understanding how development affects evolution using the classic Lande equation might have been hindered by a lack of a general mechanistic understanding of the developmental matrix  $\alpha$  and by the generally long-term dynamic insufficiency of the classic Lande's system.

Nevertheless, there has been progress on general mathematical aspects of how development affects evolution on various fronts. Both the classic Lande equation (Lande, 1979) and the classic canonical equation of adaptive dynamics (Dieckmann and Law, 1996) describe the evolutionary dynamics of a multivariate trait in gradient form without an explicit account of development, by considering no explicit age progression or developmental (i.e., dynamic) constraints (there is also an analogous equation for allele frequency change for multiple alleles in a single locus, first incorrectly presented by Wright, 1937 but later corrected by Edwards, 2000 and presented in Lande's form by Walsh and Lynch, 2018, Eq. 5.12a). Various research lines have extended these equations to incorporate different aspects of development. First, one line considers explicit age progression by implementing age structure, which allows individuals of different ages to coexist and to have age-specific survival and fertility rates. Thus, evolutionary dynamic equations in gradient form under age-structure have been derived under quantitative genetics assumptions (Lande, 1982), population genetics assumptions (Charlesworth, 1993, 1994), and adaptive dynamics assumptions (Durinx et al., 2008). An important feature of age-structured models is that the forces of selection decline with age due to demography, in particular due to mortality and fewer remaining reproductive events as age advances (Medawar, 1952; Hamilton, 1966; Caswell, 1978; Caswell and Shyu, 2017). Such age-specific decline in the force of selection does not occur in unstructured models.

Second, another research line in life-history theory has extended age-structured models to consider explicit developmental constraints (Gadgil and Bossert, 1970; Taylor et al., 1974; León, 1976; Schaffer, 1983; Houston et al., 1988; Roff, 1992; Houston and McNamara, 1999; Sydsæter et al., 2008). This line has considered developmentally dynamic models with two types of age-specific traits: genotypic traits called control variables, which are under direct genetic control, and developed traits called state variables, which are constructed over life according to developmental constraints, although such literature calls these constraints dynamic. This explicit consideration of developmental constraints in an evolutionary context has mostly assumed that the population is at an evolutionary equilibrium. Thus, this approach identifies evolutionarily stable (or uninvadable) controls and associated states using techniques from dynamic optimization such as optimal control and dynamic programming (Gadgil and Bossert, 1970; Taylor et al., 1974; León, 1976; Schaffer, 1983; Houston et al., 1988; Roff, 1992; Houston and McNamara, 1999). While the assumption

111 of evolutionary equilibrium yields great insight, it does not address the evolutionary dynamics which would provide  
112 a richer understanding. Moreover, the relationship between developmental constraints and genetic covariation is not  
113 made evident by this approach.

114 Third, another research line in adaptive dynamics has made it possible to mathematically model the evolutionary  
115 developmental (evo-devo) dynamics. By evo-devo dynamics we mean the evolutionary dynamics of genotypic traits  
116 that modulate the developmental dynamics of developed traits that are constructed over life subject to developmental  
117 constraints. A first step in this research line has been to consider function-valued or infinite-dimensional traits, which  
118 are genotypic traits indexed by a continuous variable (e.g., age) rather than a discrete variable as in the classic Lande  
119 equation. Thus, the evolutionary dynamics of univariate function-valued traits (e.g., body size across continuous  
120 age) has been described in gradient form by the Lande equation for function-valued traits (Kirkpatrick and Heckman,  
121 1989) and the canonical equation for function-valued traits (Dieckmann et al., 2006). Although function-valued traits  
122 may depend on age, they are not subject to developmental constraints describing their developmental dynamics, so  
123 the consideration of the evolutionary dynamics of function-valued traits alone does not model the evo-devo dynam-  
124 ics. To our knowledge, Parvinen et al. (2013) were the first to mathematically model what we here call the evo-devo  
125 dynamics (but note that there have also been models integrating mathematical modeling of the developmental dy-  
126 namics and individual-based modeling of the evolutionary dynamics, for instance, Salazar-Ciudad and Marín-Riera,  
127 2013 and Watson et al., 2013). Parvinen et al. (2013) did so by considering the evolutionary dynamics of a univariate  
128 function-valued trait (control variable) that modulates the developmental construction of a multivariate developed trait  
129 (state variables) subject to explicit developmental constraints (they refer to these as process-mediated models). This  
130 approach requires the derivation of the selection gradient of the control variable affecting the state variables, which, as  
131 age is measured in continuous time, involves calculating a functional derivative (of invasion fitness; Dieckmann et al.,  
132 2006; Parvinen et al., 2013, Eq. 4). Parvinen et al. (2013) noted the lack of a general simplified method to calculate  
133 such selection gradient, but they calculated it for specific examples. Metz et al. (2016) illustrate how to calculate  
134 such selection gradient using a fitness return argument in a specific example. Using functional derivatives, Avila et al.  
135 (2021) derive the selection gradient of a univariate function-valued trait modulating the developmental construction  
136 of a univariate developed trait for a broad class of models (where relatives interact and the genotypic trait may depend  
137 on the developed trait). They obtain a formula for the selection gradient that depends on unknown associated vari-  
138 ables (costate variables or shadow values) (Avila et al., 2021, Eqs. 7 and 23), but at evolutionary equilibrium these  
139 associated variables can be calculated solving an associated partial differential equation (their Eq. 32). Despite these  
140 advances, the analysis of these models poses substantial technical challenges, by requiring calculation of functional  
141 derivatives or (partial) differential equations at evolutionary equilibrium in addition to the equations describing the  
142 developmental dynamics. These models have yielded evolutionary dynamic equations in gradient form for genotypic  
143 traits, but not for developed traits, so they have left unanswered the question of how the evolution of developed traits  
144 with explicit developmental constraints proceeds in the fitness landscape. Additionally, these models have not pro-  
145 vided a link between developmental constraints and genetic covariation (Metz 2011; Dieckmann et al. 2006 discuss a

link between constraints and genetic covariation in controls, not states; see Supplementary Information section S1 for further details).

Fourth, a separate research line in quantitative genetics has considered models without age structure where a set of traits are functions of underlying traits such as gene content or environmental variables (Wagner, 1984, 1989; Hansen and Wagner, 2001; Rice, 2002; Martin, 2014; Morrissey, 2014, 2015). This dependence of traits on other traits is used by this research line to describe development and the genotype-phenotype map. However, this research line considers no explicit age progression, so it considers implicit rather than explicit developmental (i.e., dynamic) constraints. Thus, this line has not considered the effect of age structure nor explicit developmental constraints (Wagner, 1984, 1989; Hansen and Wagner, 2001; Rice, 2002; Martin, 2014; Morrissey, 2014, 2015). Also, this line has not provided an evolutionarily dynamic understanding of the developmental matrix, nor long-term dynamically sufficient equations in gradient form describing the evolution of developed traits.

Here we formulate a tractable mathematical framework that integrates age progression (i.e., age structure), explicit developmental constraints, and evolutionary dynamics. The framework describes the evolutionary dynamics of genotypic traits and the concomitant developmental dynamics of developed traits subject to developmental constraints. It yields dynamically sufficient expressions describing the long-term evolutionary dynamics in gradient form including for developed traits, so it shows how the climbing of an adaptive topography proceeds for developed traits in a broad class of models. It also obtains a mechanistic counterpart of the developmental matrix thus relating development to genetic covariation for a broad class of models. The resulting equations are long-term dynamically sufficient in the sense that the evolutionary dynamics of all variables involved are described over evolutionary time scales (i.e., for an arbitrary number of mutation-fixation events), including the evolutionary dynamics of the genotype, phenotype, environment, and genetic covariation modulated by development (provided the elementary components below are known or assumed).

We base our framework on adaptive dynamics assumptions (Dieckmann and Law, 1996; Metz et al., 1996; Champagnat, 2006; Durinx et al., 2008). We obtain equations describing the evolutionary dynamics in gradient form of traits  $\bar{x}$  that are constructed over a developmental process with explicit developmental constraints occurring as age progresses. Developmental constraints allow the phenotype to be “predisposed” to develop in certain ways, thus allowing for developmental bias (Arthur, 2004; Uller et al., 2018). We allow development to depend on the environment, which allows for a mechanistic description of plasticity (Pigliucci, 2001; West-Eberhard, 2003). We also allow development to depend on social interactions, which allows for a mechanistic description of extra-genetic inheritance (Boyd and Richerson, 1985; Jablonka and Lamb, 2014; Bonduriansky and Day, 2018) and indirect genetic effects (Moore et al., 1997). In turn, we allow the environment faced by each individual to depend on the traits of the individual and of social partners, thus allowing for individual and social niche construction although we do not consider ecological inheritance (Odling-Smee et al., 1996, 2003). We also let the environment depend on processes that are exogenous to the evolving population, such as eutrophication or climate change caused by members of other species, thus allowing for exogenous environmental change. To facilitate analysis, we let population dynamics occur

181 over a short time scale, whereas environmental and evolutionary dynamics occur over a long time scale. Crucially, we  
182 measure age in discrete time, which simplifies the mathematics yielding closed-form formulas for otherwise implicitly  
183 defined quantities. Our methods use concepts from optimal control (Sydsæter et al., 2008) and integrate tools from  
184 adaptive dynamics (Dieckmann and Law, 1996) and matrix population models (Caswell, 2001; Otto and Day, 2007).  
185 While we use concepts from optimal control, we do not use optimal control itself and instead derive an alternative  
186 method to optimal control that can be used to obtain optimal controls in a broad class of evolutionary models with  
187 dynamic constraints. Our approach differs somewhat from standard matrix population models, where the stage (e.g.,  
188 age and size) of an individual is discrete and described as indices of the population density vector (Caswell, 2001;  
189 Caswell et al., 1997; de Vries and Caswell, 2018; Caswell, 2019, Ch. 6); instead, we let the stage of an individual be  
190 partly discrete (specifically, age), described as indices in the population density vector, and partly continuous (e.g.,  
191 size), described as arguments of various functions.

192 We obtain three sets of main results. First, we derive several closed-form formulas for the total selection gra-  
193 dient of genotypic traits  $\bar{y}$  (i.e., of control variables) that affect the development of the phenotype  $\bar{x}$  (i.e., of state  
194 variables), formulas that can be easily computed with elementary operations. The total selection gradient of geno-  
195 typic traits is the selection gradient that appears in the canonical equation of adaptive dynamics of  $\bar{y}$ , so coupling the  
196 total selection gradient of genotypic traits, the canonical equation, and the developmental constraint describing the  
197 developmental dynamics of developed traits provides simple expressions to model the evo-devo dynamics in a broad  
198 class of models. In particular, these expressions provide an alternative method to dynamic optimization (e.g., dynamic  
199 programming or optimal control) to calculate evolutionary outcomes for evolutionary (e.g., life history) models with  
200 developmentally dynamic traits, both analytically for sufficiently simple models and numerically for more complex  
201 ones. Second, we derive equations in gradient form describing the evolutionary dynamics of developed traits  $\bar{x}$  and  
202 of the niche-constructed environment. These equations motivate a definition of the “mechanistic additive genetic  
203 covariance matrix” in terms of “mechanistic breeding value”, defined in turn in terms of a mechanistic counterpart  
204 of Fisher’s (1918) additive effects of allelic substitution obtained from the developmental process rather than from  
205 regression. Specifically, we obtain formulas for a mechanistic counterpart of the developmental matrix  $\alpha$  for a broad  
206 class of models. This yields closed-form formulas for the sensitivity of the solutions of a system of recurrence equa-  
207 tions and are thus of use beyond evolutionary or biological applications, formulas that seem to have been previously  
208 unavailable (Johnson, 2011). Analogously to the classic Lande equation, our equation describing the evolutionary  
209 dynamics of the developed traits  $\bar{x}$  depends on the genotypic traits  $\bar{y}$  and so it is generally dynamically insufficient if  
210 the evolutionary dynamics of the genotypic traits is not considered. Third, we obtain synthetic equations in gradient  
211 form simultaneously describing the evolutionary dynamics of genotypic, developed, and environmental traits. These  
212 equations are in gradient form and are dynamically sufficient in that they include as many evolutionarily dynamic  
213 equations as evolutionarily dynamic variables, which enables one to describe the long-term evolution of developed  
214 multivariate phenotypes as the climbing of a fitness landscape. Such equations describe the evolutionary dynamics  
215 of the constraining matrix analogous to  $\mathbf{G}$  as an emergent property, where genotypic traits  $\bar{y}$  play an analogous role



to that of allele frequency under quantitative genetics assumptions while linkage disequilibrium is not an issue as we assume clonal reproduction. In this extended dynamically sufficient Lande's system, the associated constraining matrix is always singular, which is mathematically trivial, but biologically crucial as it entails that development plays a major evolutionary role.

## 2. Problem statement

We begin by describing the mathematical problem we address. We consider a finite age-structured population with deterministic density-dependent population dynamics with age measured in discrete time. Each individual is described by three types of traits that we call genotypic, phenotypic (or developed), and environmental, all of which can vary with age and can evolve. We let all traits take continuous values, which allows us to take derivatives. Genotypic traits are defined by being directly genetically controlled: for instance, a genotypic trait may be the presence or absence of a given nucleotide at a given single-nucleotide locus (Voss, 1992), described with a continuous representation (see below). Phenotypic traits are defined by being constructed over life subject to a developmental constraint: for instance, a phenotypic trait may be body size subject to the influence of genes, developmental history, environment, social interactions, and developmental processes constructing the body. Environmental traits are defined as describing the local environment of the individual subject to an environmental constraint: for instance, an environmental trait may be ambient temperature, which the individual may adjust behaviorally such as by roosting in the shade. We assume that reproduction transmits genotypic traits clonally, but developed and environmental traits need not be transmitted clonally due to social interactions. Given clonal reproduction of genotypic traits, we do not need to further specify the genetic architecture (e.g., ploidy, number of loci, or linkage) and it may depend on the particular model. We assume that the genotypic traits are *developmentally independent*, whereby genotypic traits are entirely specified by the individual's genotype and do not depend on other traits expressed over development: in particular, this means that the genotype can only be modified by mutation, but the genotype at a given locus and age does not depend on other loci, the phenotype, or the environment. Developmental independence corresponds to the notion of "open-loop" control of optimal control theory (Sydsæter et al., 2008). Genotypic traits may still be *mutationally correlated*, whereby genotypic traits may tend to mutate together or separately. We assume that environmental traits are mutually independent, which facilitates derivations. We obtain dynamically sufficient equations in gradient form for the evolution of the phenotype by aggregating the various types of traits. We give names to such aggregates for ease of reference. We call the aggregate of the genotype and phenotype the *geno-phenotype*. We call the aggregate of the genotype, phenotype, and environment the *geno-envo-phenotype*.

The above terminology departs from standard terminology in adaptive dynamics as follows. In adaptive dynamics, our genotypic traits are referred to as the phenotype and our phenotypic traits as function-valued phenotypes (or state variables). We depart from this terminology to follow the biologically common notion that the phenotype is constructed over development. In turn, adaptive dynamics terminology defines the environment as any quantity outside

249 the individual, and thus refers to the global environment. In contrast, by environment we refer to the local environment  
 250 of the individual. This allows us to model niche construction as the local environment of a mutant individual may  
 251 differ from that of a resident.

252 We use the following notation (Table 1). Each individual can live from age 1 to age  $N_a \in \{2, 3, \dots\}$ . Each individual  
 253 has a number  $N_g$  of genotypic traits at each age. A mutant's genotypic trait  $i \in \{1, \dots, N_g\}$  at age  $a \in \{1, \dots, N_a\}$  is  
 254  $y_{ia} \in \mathbb{R}$ . For instance,  $y_{ia}$  may be a continuous representation of nucleotide presence at a locus: let  $Y_{IJa}$  be 1 if  
 255 nucleotide  $I \in \{1, 2, 3, 4\}$  (for A, C, G, T) is at locus  $J \in \{1, \dots, n\}$  at age  $a$  or 0 otherwise and let  $\mathbf{Y}_a$  be the  
 256 corresponding matrix (see Fig. 1 of Voss, 1992); then, the  $i$ -th entry of  $\text{vec}(\mathbf{Y}_a)$  gives whether the nucleotide  $I = \lceil i/n \rceil$   
 257 is present at locus  $J = i - \lfloor i/n \rfloor n$ , where  $\lceil \cdot \rceil$  and  $\lfloor \cdot \rfloor$  are the ceiling and floor functions; the  $i$ -th entry of  $\text{vec}(\mathbf{Y}_a)$  may be  
 258 represented by the Heaviside function, which can be approximated by  $\tilde{y}_{ia} = 1/[1 + \exp(-y_{ia}/\gamma)]$ , where  $\gamma > 0$  is small  
 259 and  $y_{ia} \in [-10\gamma, 10\gamma]$  is continuous. Another example is that  $y_{ia}$  is the value of a life-history trait  $i$  at age  $a$  assumed to  
 260 be directly under genetic control (i.e., a control variable in life-history models; Gadgil and Bossert, 1970; Taylor et al.,  
 261 1974; León, 1976; Schaffer, 1983). While  $y_{ia}$  may be often constant with age  $a$  in the first example, it generally is not  
 262 in the second so we allow genotypic traits to depend on age. Given our assumption of developmental independence  
 263 of genotypic traits, the genotypic trait value  $y_{ia}$  for all  $i \in \{1, \dots, N_g\}$  and all  $a \in \{1, \dots, N_a\}$  of a given individual is  
 264 exclusively controlled by her genotype but mutations can tend to change the value of  $y_{ia}$  and  $y_{kj}$  simultaneously for  
 265  $k \neq i$  and  $j \neq a$ . Additionally, each individual has a number  $N_p$  of developed traits, that is, of phenotypes at each age.  
 266 A mutant's phenotype  $i \in \{1, \dots, N_p\}$  at age  $a \in \{1, \dots, N_a\}$  is  $x_{ia} \in \mathbb{R}$ . Moreover, each individual has a number  $N_e$  of  
 267 environmental traits that describe her local environment at each age. A mutant's environmental trait  $i \in \{1, \dots, N_e\}$  at  
 268 age  $a \in \{1, \dots, N_a\}$  is  $\epsilon_{ia} \in \mathbb{R}$ . Although we do not consider the developmental or evolutionary change of the number  
 269 of traits (i.e., of  $N_g$ ,  $N_p$ , or  $N_e$ ), our framework still allows for the modelling of the developmental or evolutionary  
 270 origin of novel traits (e.g., the origin of a sixth digit where there was five previously in development or evolution;  
 271 Chan et al., 1995; Litingtung et al., 2002; Müller, 2010, or a gene duplication event) by implementing a suitable  
 272 codification (e.g., letting  $x_{ia}$  mean sixth-digit length, being zero in a previous age or evolutionary time; or by letting  
 273  $\tilde{y}_{ia}$  mean nucleotide presence and be zero for all novel loci before duplication).

274 We use the following notation for collections of these quantities. A mutant's  $i$ -th genotypic trait across all ages  
 275 is denoted by the column vector  $\mathbf{y}_i = (y_{i1}; \dots; y_{iN_a}) \in \mathbb{R}^{N_a \times 1}$ , where the semicolon indicates a line break, that is,  $\mathbf{y}_i =$   
 276  $(y_{i1}, \dots, y_{iN_a})^\top$ . A mutant's  $i$ -th phenotype across all ages is denoted by the column vector  $\mathbf{x}_i = (x_{i1}; \dots; x_{iN_a}) \in \mathbb{R}^{N_a \times 1}$ .  
 277 A mutant's  $i$ -th environmental trait across all ages is denoted by the column vector  $\boldsymbol{\epsilon}_i = (\epsilon_{i1}; \dots; \epsilon_{iN_a}) \in \mathbb{R}^{N_a \times 1}$ . A  
 278 mutant's genotype across all genotypic traits and all ages is denoted by the block column vector  $\mathbf{y} = (\mathbf{y}_1; \dots; \mathbf{y}_{N_g}) \in$   
 279  $\mathbb{R}^{N_a N_g \times 1}$ . A mutant's phenotype across all developed traits and all ages is denoted by the block column vector  $\mathbf{x} =$   
 280  $(\mathbf{x}_1; \dots; \mathbf{x}_{N_p}) \in \mathbb{R}^{N_a N_p \times 1}$ . A mutant's environment across all environmental traits and all ages is denoted by the block  
 281 column vector  $\boldsymbol{\epsilon} = (\boldsymbol{\epsilon}_1; \dots; \boldsymbol{\epsilon}_{N_e}) \in \mathbb{R}^{N_a N_e \times 1}$ . To simultaneously refer to the genotype and phenotype, we denote the  
 282 geno-phenotype of the mutant individual at age  $a$  as  $\mathbf{z}_a = (\mathbf{x}_a; \mathbf{y}_a) \in \mathbb{R}^{(N_p + N_g) \times 1}$ , and the geno-phenotype of a mutant  
 283 across all ages as  $\mathbf{z} = (\mathbf{x}; \mathbf{y}) \in \mathbb{R}^{N_a(N_p + N_g) \times 1}$ . Moreover, to simultaneously refer to the genotype, phenotype, and

environment, we denote the geno-envo-phenotype of a mutant individual at age  $a$  as  $\mathbf{m}_a = (\mathbf{z}_a; \boldsymbol{\epsilon}_a) \in \mathbb{R}^{(N_p+N_g+N_e) \times 1}$ ,  
 and the geno-envo-phenotype of the mutant across all ages as  $\mathbf{m} = (\mathbf{z}; \boldsymbol{\epsilon}) \in \mathbb{R}^{N_a(N_p+N_g+N_e) \times 1}$ . We denote resident values  
 analogously with an overbar (e.g.,  $\bar{\mathbf{z}}$  is the resident geno-phenotype).

Table 1: **Notation summary**

| Symbol                                                            | Meaning                                                                            |
|-------------------------------------------------------------------|------------------------------------------------------------------------------------|
| $\mathbf{x}$                                                      | Phenotype (developed traits)                                                       |
| $\mathbf{y}$                                                      | Genotype (genotypic traits)                                                        |
| $\mathbf{z}$                                                      | Geno-phenotype (genotype and phenotype)                                            |
| $\boldsymbol{\epsilon}$                                           | Environment                                                                        |
| $\mathbf{m}$                                                      | Geno-envo-phenotype (genotype, phenotype, and environment)                         |
| $N_a$                                                             | Number of ages                                                                     |
| $N_p$                                                             | Number of developed traits                                                         |
| $N_g$                                                             | Number of genotypic traits                                                         |
| $N_e$                                                             | Number of environmental traits                                                     |
| $\mathbf{g}$                                                      | Developmental map                                                                  |
| $\mathbf{h}$                                                      | Environmental map                                                                  |
| $\mathbf{n}$                                                      | Population density                                                                 |
| $f$                                                               | Fertility                                                                          |
| $p$                                                               | Survival probability                                                               |
| $\ell$                                                            | Survivorship                                                                       |
| $w$                                                               | Fitness                                                                            |
| $\lambda$                                                         | Invasion fitness                                                                   |
| $\mathbf{u}$                                                      | Stable age distribution                                                            |
| $\mathbf{v}$                                                      | Reproductive value                                                                 |
| $\phi$                                                            | Force of selection on fertility                                                    |
| $\pi$                                                             | Force of selection on survival                                                     |
| $t$                                                               | Ecological time                                                                    |
| $\tau$                                                            | Evolutionary time                                                                  |
| $\theta$                                                          | Socio-devo time                                                                    |
| $T$                                                               | Generation time                                                                    |
| $\check{\mathbf{x}}$                                              | Resident phenotype in the context of mutant                                        |
| $\hat{\mathbf{z}}$                                                | Unperturbed geno-phenotype                                                         |
| $\boldsymbol{\zeta}, \boldsymbol{\xi}$                            | Arbitrary vectors                                                                  |
| $\mathbf{b}_\zeta$                                                | Mechanistic breeding value of $\boldsymbol{\zeta}$                                 |
| $\mathbf{b}_\zeta^s$                                              | Stabilized mechanistic breeding value of $\boldsymbol{\zeta}$                      |
| $\mathbf{H}_\zeta$                                                | Mechanistic additive genetic covariance matrix of $\boldsymbol{\zeta}$             |
| $\mathbf{L}_\zeta$                                                | Mechanistic additive socio-genetic cross-covariance matrix of $\boldsymbol{\zeta}$ |
| $\frac{\partial \boldsymbol{\zeta}^T}{\partial \boldsymbol{\xi}}$ | Direct effects of $\boldsymbol{\xi}$ on $\boldsymbol{\zeta}$                       |
| $\frac{\delta \boldsymbol{\zeta}^T}{\delta \boldsymbol{\xi}}$     | Total immediate effects of $\boldsymbol{\xi}$ on $\boldsymbol{\zeta}$              |
| $\frac{d \boldsymbol{\zeta}^T}{d \boldsymbol{\xi}}$               | Total effects of $\boldsymbol{\xi}$ on $\boldsymbol{\zeta}$                        |
| $\frac{s \boldsymbol{\zeta}^T}{s \boldsymbol{\xi}}$               | Stabilized effects of $\boldsymbol{\xi}$ on $\boldsymbol{\zeta}$                   |

287 The developmental process that constructs the phenotype is as follows (with causal dependencies described in  
288 Fig. 1). We assume that an individual’s multivariate phenotype at a given age is a function of the genotypic, phe-  
289 notypic, and environmental traits that the individual had at the immediately previous age as well as of the social  
290 interactions experienced at that age. Thus, we assume that a mutant’s multivariate phenotype at age  $a + 1$  is given by  
291 the developmental constraint

$$\mathbf{x}_{a+1} = \mathbf{g}_a(\mathbf{m}_a, \bar{\mathbf{z}}) \quad (1)$$

292 for all  $a \in \{1, \dots, N_a - 1\}$  with initial condition  $\mathbf{x}_1 = \bar{\mathbf{x}}_1$ . The function

$$\mathbf{g}_a(\mathbf{m}_a, \bar{\mathbf{z}}) = (g_{1a}(\mathbf{m}_a, \bar{\mathbf{z}}); \dots; g_{N_p a}(\mathbf{m}_a, \bar{\mathbf{z}}))$$

293 is the developmental map at age  $a$ , which we assume is a differentiable function of the individual’s geno-envo-  
294 phenotype at that age and of the geno-phenotype of the individual’s social partners who can be of any age; thus,  
295 an individual’s development directly depends on the individual’s local environment but not directly on the local  
296 environment of social partners. The developmental constraint (1) is a mathematical, deterministic description of  
297 Waddington’s (1957) “epigenetic landscape”. Eq. (1) is a constraint in that the phenotype  $\mathbf{x}_{a+1}$  cannot take any value  
298 but only those that satisfy the equality (e.g., an individual’s body size today cannot take any value but depends on  
299 her body size, gene expression, and environment since yesterday). The term developmental function can be traced  
300 back to Gimelfarb (1982) through Wagner (1984). The developmental map in Eq. (1) is an extension of the notions  
301 of genotype-phenotype map (often a function from genotype to phenotype, without explicit developmental dynamics)  
302 and reaction norm (often a function from environment to phenotype, also without explicit developmental dynamics),  
303 as well as of early mathematical descriptions of development in an evolutionary context (Alberch et al., 1979). The  
304 dependence of the mutant phenotype on the phenotype of social partners in (1) allows one to implement Jablonka and  
305 Lamb’s (2014) notion that extra-genetic inheritance transmits the phenotype rather than the genotype (see their p. 108),  
306 such that in (1) the mutant phenotype can be a possibly altered copy of social partners’ phenotype. The developmental  
307 map in Eq. (1) may be non-linear and can change over development (e.g., from  $g_{ia} = \sin x_{ia}$  to  $g_{ij} = x_{ij}^\beta$  for  $a < j$  and  
308 some parameter  $\beta$ , for instance, due to metamorphosis) and over evolution (e.g., from a sine to a power function if  
309  $g_{ia} = [\tilde{y}_{ja} \sin x_{ia} + (1 - \tilde{y}_{ja})x_{ia}^\beta]$  as nucleotide presence  $\tilde{y}_{ja}$  evolves from 0 to 1). Simpler forms of the developmental  
310 constraint (1) are standard in life-history models, which call such constraints dynamic stemming from the terminology  
311 of optimal control theory (Gadgil and Bossert, 1970; Taylor et al., 1974; León, 1976; Schaffer, 1983; Sydsæter et al.,  
312 2008). Simpler forms of the developmental constraint (1) are also standard in physiologically structured models of  
313 population dynamics (de Roos, 1997, Eq. 7). The developmental constraint (1) can describe gene regulatory networks  
314 (Alon, 2020), learning in deep neural networks (Saxe et al., 2019), and reaction-diffusion models of morphology  
315 (Murray, 2003) in discrete developmental time and space, once such models are written in the form of Eq. (1) (e.g.,  
316 if space is one-dimensional, the  $i$ -th developed trait may refer to the  $i$ -th spatial location; more spatial dimensions  
317 would require care in the mapping from multidimensional space to the unidimensional  $i$ -th phenotypic index, but

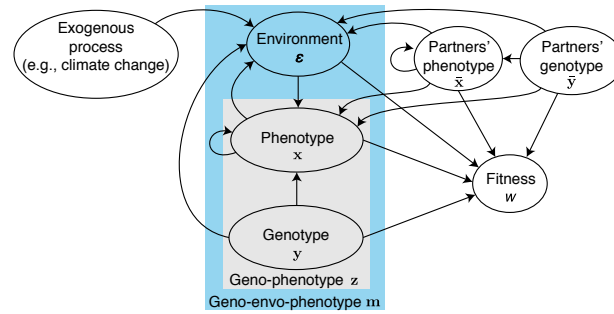

Figure 1: Causal diagram among the framework’s components. Variables have age-specific values which are not shown for clarity. The phenotype  $x$  is constructed by a developmental process. Each arrow indicates the direct effect of a variable on another one. A mutant’s genotypic traits may directly affect the phenotype (with the slope quantifying developmental bias from genotype), environment (niche construction by genotype), and fitness (direct selection on genotype). A mutant’s phenotype at a given age may directly affect her phenotype at an immediately subsequent age (quantifying developmental bias from the phenotype), thus the direct feedback loop from phenotype to itself. A mutant’s phenotype may also directly affect her environment (niche construction by the phenotype) and fitness (direct selection on the phenotype). A mutant’s environment may directly affect the phenotype (plasticity) and fitness (environmental sensitivity of selection). The social partners’ genotype may directly affect their own phenotype (quantifying developmental bias from genotype), the mutant’s phenotype (indirect genetic effects from genotypes), and the mutant’s fitness (social selection on genotype). The social partners’ phenotype at a given age may directly affect their own phenotype at an immediately subsequent age (quantifying developmental bias from phenotypes), thus the direct feedback loop. The social partners’ phenotype at a given age may also directly affect the mutant’s phenotype (quantifying indirect genetic effects from the phenotype), the mutant’s environment (social niche construction), and the mutant’s fitness (social selection on the phenotype). The environment may also be directly influenced by exogenous processes. We assume that the genotype is developmentally independent (i.e., controls  $y$  are open-loop), which means that there is no arrow towards the genotype.

doing so is possible; Supplementary Information section S6). The developmental constraint (1) also admits that a slight perturbation in the geno-envo-phenotype at an early age yields a large change in the phenotype at a later age, possibly changing it from zero to an appreciable value (as in descriptions of developmental innovation (Goldschmidt, 1940; Gould, 1977; Orr and Coyne, 1992; Orr, 2005; Müller, 2010), possibly via exploratory processes highlighted by Gerhart and Kirschner 2007 and Kirschner and Gerhart (2010) provided a mathematical model of such processes satisfies Eq. (1)). However, slight perturbations yielding large phenotypic effects raise the question of whether our assumption below that invasion implies fixation is violated if mutant phenotypes  $x$  deviate substantially from resident phenotypes  $\bar{x}$ ; indeed, it has previously been established that invasion implies fixation if mutant *genotypes*  $y$  do not deviate substantially from resident genotypes  $\bar{y}$  (Geritz et al., 2002; Geritz, 2005; Dieckmann et al., 2006; Priklopil and Lehmann, 2020), which we assume. We leave for future work to address explicitly whether large deviations in mutant phenotypes in our sense of the word still entail that invasion implies fixation because of small deviations in mutant genotypes. For simplicity, we assume that the phenotype  $x_1 = \bar{x}_1$  at the initial age is constant and does not evolve. This assumption corresponds to the common assumption in life-history models that state variables at the initial age are given (Gadgil and Bossert, 1970; Taylor et al., 1974; León, 1976; Schaffer, 1983; Sydsæter et al., 2008).

We describe the local environment as follows. We assume that an individual’s local environment at a given age

333 is a function of the genotypic traits, phenotype, and social interactions of the individual at that age, and of processes  
 334 that are not caused by the population considered. Thus, we assume that a mutant's environment at age  $a$  is given by  
 335 the environmental constraint

$$\boldsymbol{\epsilon}_a = \mathbf{h}_a(\mathbf{z}_a, \bar{\mathbf{z}}, \tau) \quad (2)$$

336 for all  $a \in \{1, \dots, N_a\}$ . The function

$$\mathbf{h}_a(\mathbf{z}_a, \bar{\mathbf{z}}, \tau) = (h_{1a}(\mathbf{z}_a, \bar{\mathbf{z}}, \tau); \dots; h_{N_a}(\mathbf{z}_a, \bar{\mathbf{z}}, \tau))$$

337 is the environmental map at age  $a$ , which can change over development and evolution. We assume that the environ-  
 338 mental map is a differentiable function of the individual's geno-phenotype at that age (e.g., the individual's behavior  
 339 at a given age may expose it to a particular environment at that age), the geno-phenotype of the individual's so-  
 340 cial partners who can be of any age (e.g., through social niche construction), and evolutionary time  $\tau$  due to slow  
 341 exogenous environmental change. We assume slow exogenous environmental change to enable the resident popu-  
 342 lation to reach carrying capacity to be able to use relatively simple techniques of evolutionary invasion analysis to  
 343 derive selection gradients. The environmental constraint (2) may also be non-linear and can change over develop-  
 344 ment (i.e., over  $a$ ) and over evolution (as the genotype or phenotype evolves or exogenously as evolutionary time  
 345 advances). The environmental constraint (2) is a minimalist description of the environment of a specific kind (akin  
 346 to "feedback functions" used in physiologically structured models to describe the influence of individuals on the en-  
 347 vironment; de Roos, 1997). A different, perhaps more realistic environmental constraint would be constructive of  
 348 the form  $\boldsymbol{\epsilon}_{a+1} = \mathbf{h}_a(\mathbf{m}_a, \bar{\mathbf{z}}, \tau)$ , in which case the only structural difference between an environmental trait and a de-  
 349 veloped trait would be the dependence of the environmental trait on exogenous processes (akin to "feedback loops"  
 350 used in physiologically structured models to describe the influence of individuals on the environment; de Roos, 1997).  
 351 The environmental constraint could be further extended to model ecological inheritance by letting the environmental  
 352 constraint have the form  $\boldsymbol{\epsilon}_{a+1} = \mathbf{h}_a(\bar{\boldsymbol{\epsilon}}(\tau - \Delta\tau), \mathbf{m}_a, \bar{\mathbf{z}}, \tau)$ , where the environmental map now depends on the resident  
 353 environment at the previous evolutionary time (a similar lag could be added to the developmental map so it depends  
 354 on the resident geno-phenotype at the previous evolutionary time to model certain aspects of symbolic social learning;  
 355 Jablonka and Lamb, 2010, 2014; Odling-Smee, 2010). We use the minimalist environmental constraint (2) as a first  
 356 approximation to shorten derivations; our derivations illustrate how one could obtain equations with more complex  
 357 developmental and environmental constraints. With the minimalist environmental constraint (2), the environmental  
 358 traits are mutually independent in that changing one environmental trait at one age does not *directly* change any other  
 359 environmental trait at any age (i.e.,  $\partial\epsilon_{kj}/\partial\epsilon_{ia} = 0$  if  $i \neq k$  or  $a \neq j$ ). We say that development is social if  $d\mathbf{x}^\top/d\bar{\mathbf{z}}|_{\mathbf{y}=\bar{\mathbf{y}}} \neq \mathbf{0}$ .

360 Our aim is to obtain closed-form equations describing the evolutionary dynamics of the resident phenotype  $\bar{\mathbf{x}}$   
 361 subject to the developmental constraint (1) and the environmental constraint (2). The evolutionary dynamics of the  
 362 phenotype  $\bar{\mathbf{x}}$  emerge as an outgrowth of the evolutionary dynamics of the genotype  $\bar{\mathbf{y}}$  and environment  $\bar{\boldsymbol{\epsilon}}$ . In the  
 363 Supplementary Information section S3, we provide a short derivation of the canonical equation of adaptive dynamics

closely following Dieckmann and Law (1996) although assuming deterministic population dynamics. The canonical equation describes the evolutionary dynamics of resident genotypic traits as:

$$\frac{\Delta \bar{\mathbf{y}}}{\Delta \tau} \approx \iota \mathbf{H}_{\mathbf{y}} \left. \frac{d\lambda}{d\mathbf{y}} \right|_{\mathbf{y}=\bar{\mathbf{y}}}, \quad (3)$$

where  $\lambda = \lambda(\mathbf{m}, \bar{\mathbf{m}})$  is invasion fitness,  $\iota$  is a non-negative scalar measuring mutational input proportional to the mutation rate and the carrying capacity, and  $\mathbf{H}_{\mathbf{y}} = \text{cov}[\mathbf{y}, \mathbf{y}]$  is the mutational covariance matrix (of genotypic traits). The selection gradient in Eq. (3) involves total derivatives so we call it the *total* selection gradient of the genotype, which measures the effects of genotypic traits  $\mathbf{y}$  on invasion fitness  $\lambda$  across all the paths in Fig. 1. Total selection gradients, namely total derivatives of invasion fitness with respect to mutant traits evaluated at resident traits, are conceptually similar to the notion of “total derivative of fitness” of Caswell (1982, 2001) denoted by him as  $d\lambda$ , “total differential” of Charlesworth (1994) denoted by him as  $dr$ , “integrated sensitivity” of van Tienderen (1995) denoted by him as IS, and of “extended selection gradient” of Morrissey (2014, 2015) denoted by him as  $\eta$ . However, total selection gradients differ from Lande’s selection gradient in that the latter is defined in terms of partial derivatives and so measures only the direct effects of traits on fitness (Fig. 1). We will be concerned with describing the evolutionary dynamics to first-order of approximation, so we will treat the approximation in Eq. (3) as an equality although we keep the approximation symbols throughout to distinguish what is and what is not an approximation.

The arrangement above describes the evolutionary developmental (evo-devo) dynamics: the evolutionary dynamics of the resident genotype are given by the canonical equation (3), while the concomitant developmental dynamics of the phenotype are given by the developmental (1) and environmental (2) constraints evaluated at resident trait values. To complete the description of the evo-devo dynamics, we obtain closed-form expressions for the total selection gradient of the genotype. Moreover, to determine whether the evolution of the resident developed phenotype  $\bar{\mathbf{x}}$  can be described as the climbing of a fitness landscape, we derive equations in gradient form describing the evolutionary dynamics of the resident phenotype  $\bar{\mathbf{x}}$ , environment  $\bar{\mathbf{e}}$ , geno-phenotype  $\bar{\mathbf{z}}$ , and geno-envo-phenotype  $\bar{\mathbf{m}}$ . To do so, we first give an overview of the model, which describes a complication introduced by social development, how we handle it, and well-known first-order approximations to invasion fitness in age-structured populations. We then use these descriptions to write our results. Derivations are in the Appendices.

### 3. Model overview

Here we give an overview of the model. We describe it in detail in the Supplementary Information section S2.

#### 3.1. Set up

We base our framework on standard assumptions of adaptive dynamics, particularly following Dieckmann and Law (1996). We separate time scales, so developmental and population dynamics occur over a short discrete ecological time scale  $t$  and evolutionary dynamics occur over a long discrete evolutionary time scale  $\tau$ . Although the population

394 is finite, in a departure from Dieckmann and Law (1996), we let the population dynamics be deterministic rather  
395 than stochastic for simplicity, so there is no genetic drift. Thus, the only source of stochasticity in our framework is  
396 mutation. We assume that mutation is rare, weak, and unbiased. Weak mutation means that the variance of mutant  
397 genotypic traits around resident genotypic traits is marginally small (i.e., a mutant  $\mathbf{y}$  is marginally different from the  
398 resident  $\bar{\mathbf{y}}$ , so  $0 < E[\|\mathbf{y} - \bar{\mathbf{y}}\|^2] = \text{tr}(\text{cov}[\mathbf{y}, \mathbf{y}]) = \sum_{i=1}^{N_g} \sum_{a=1}^{N_a} E[(y_{ia} - \bar{y}_{ia})^2] \ll 1$ . Weak mutation (Gillespie, 1983; Walsh  
399 and Lynch, 2018, p. 1003) is also called  $\delta$ -weak selection (Wild and Traulsen, 2007). Unbiased mutation means  
400 that mutant genotypic traits are symmetrically distributed around the resident genotypic traits (i.e., the mutational  
401 distribution  $M(\mathbf{y} - \bar{\mathbf{y}})$  is even, so  $M(\mathbf{y} - \bar{\mathbf{y}}) = M(\bar{\mathbf{y}} - \mathbf{y})$ ). Yet, unbiased mutation in genotypic traits still allows for bias  
402 in the distribution of mutant phenotypes since a function of a random variable may have a different distribution from  
403 that of the random variable (i.e., the distribution of  $\mathbf{x} - \bar{\mathbf{x}}$  is not even in general); thus, we do not make the isotropy  
404 assumption of Fisher's (1930) geometric model (Orr, 2005), although isotropy may arise for mechanistic breeding  
405 values (defined below) with large  $N_a N_g$  and additional assumptions (e.g., high pleiotropy and high developmental  
406 integration) from the central limit theorem (Martin, 2014). We assume that a monomorphic resident population having  
407 geno-envo-phenotype  $\bar{\mathbf{m}}$  undergoes density-dependent population dynamics that bring it to carrying capacity. At this  
408 carrying capacity, rare mutant individuals arise which have a marginally different genotype  $\mathbf{y}$  and that develop their  
409 phenotype in the context of the resident. If the mutant genotype increases in frequency, it increasingly faces mutant  
410 rather than resident individuals. Thus, with social development, the mutant phenotype may change as the mutant  
411 genotype spreads, which complicates invasion analysis.

### 412 3.2. A complication introduced by social development

413 With social development, the phenotype an individual develops depends on the traits of her social partners. This  
414 introduces a complication to standard evolutionary invasion analysis, for two reasons. First, the phenotype of a mutant  
415 genotype may change as the mutant genotype spreads and is more exposed to the mutant's traits via social interactions,  
416 making the mutant phenotype frequency dependent. Thus, the phenotype developed by a rare mutant genotype in the  
417 context of a resident phenotype may be different from the phenotype developed by the same mutant genotype in the  
418 context of itself once the mutant genotype has approached fixation. Second, because of social development, a recently  
419 fixed mutant may not breed true, that is, her descendants may have a different phenotype from her own despite clonal  
420 reproduction of the genotype and despite the mutant genotype being fixed (Fig. 2; see also Kobayashi et al. 2015,  
421 Eq. 14 in their Appendix). Yet, to apply standard invasion analysis techniques, the phenotype of the fixed genotype  
422 must breed true, so that the phenotype of a mutant genotype developed in the context of individuals with the mutant  
423 genotype have the same phenotype.

424 To carry out invasion analysis, we proceed as follows. Ideally, one should follow explicitly the change in mutant  
425 phenotype as the mutant genotype increases in frequency and achieves fixation, and up to a point where the fixed  
426 mutant phenotype breeds true. Yet, to simplify the analysis, we separate the dynamics of phenotype convergence and  
427 the population dynamics. We thus introduce an additional phase to the standard separation of time scales in adaptive



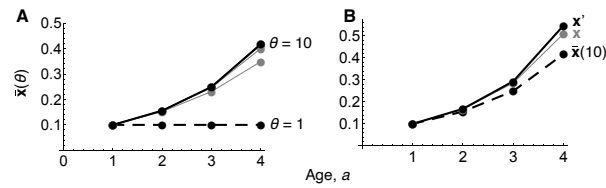

Figure 2: A difficulty introduced by social development. (A) Illustration of socio-devo dynamics. The dashed line is a socio-devo initial resident phenotype  $\bar{x}_a(\theta) = 0.1$  for all  $a \in \{1, \dots, 4\}$ ,  $\bar{x}_1 = 0.1$ , and socio-devo time  $\theta = 1$ . The gray line immediately above is a phenotype developed in the context of such resident, where  $\bar{x}_{a+1}(2) = g_a(\bar{z}_a, \bar{x}_{a+1}) = \bar{x}_a(2) + \bar{y}_a\{\bar{x}_a(2) + q[\bar{x}_{a+1}(1)]^2\}$ , with  $\bar{y}_a = 0.5$  for all  $a \in \{1, \dots, 4\}$  and  $q = 0.5$ . Setting this phenotype  $\bar{x}(2)$  as resident and iterating up to  $\theta = 10$  yields the remaining gray lines, with iteration 10 given by the black line, where  $\bar{x}_{a+1}(10) = \bar{x}_a(10) + \bar{y}_a\{\bar{x}_a(10) + q[\bar{x}_{a+1}(9)]^2\}$  and  $\bar{x}(10) \approx \bar{x}(9)$  is approximately a socio-devo stable equilibrium, which breeds true. (B) Introducing in the context of such resident  $\bar{x}(10)$  (dashed line) a mutant genotype  $y$  yields the mutant phenotype  $x$  (gray line), where  $x_{a+1} = x_a + y_a\{x_a + q[\bar{x}_{a+1}(10)]^2\}$  and  $y_a = 0.6$  for all  $a \in \{1, \dots, 4\}$ . Such mutant does not breed true: a mutant  $x'$  (solid black line) with the same genotype developed in the context of mutant  $x$  has a different phenotype, where  $x'_{a+1} = x'_a + y_a\{x'_a + q[x_{a+1}]^2\}$ . One can use socio-devo dynamics (A) to find for such mutant genotype  $y$  a phenotype that breeds true under social development.

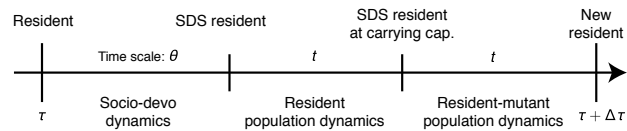

Figure 3: Phases of an evolutionary time step. Evolutionary time is  $\tau$ . SDS means socio-devo stable. The socio-devo dynamics phase is added to the standard separation of time scales in adaptive dynamics, which only consider the other two phases. The socio-devo dynamics phase is only needed if development is social (i.e., if the developmental map  $g_a$  depends directly or indirectly on social partners' geno-phenotype for some age  $a$ ).

dynamics so that phenotypic convergence occurs first and then resident population dynamics follow. Such additional 428  
 phase does not describe a biological process but is a mathematical technique to facilitate mathematical treatment (akin 429  
 to using best-response dynamics to find Nash equilibria). However, this phase might still be biologically justified under 430  
 somewhat broad conditions. In particular, Aoki et al. (2012, their Appendix A) show that such additional phase is 431  
 justified in their model of social learning evolution if mutants are rare and social learning dynamics happen faster than 432  
 allele frequency change; they also show that this additional phase is justified for their particular model if selection 433  
 is  $\delta$ -weak. As a first approximation, here we do not formally justify the separation of phenotype convergence and 434  
 resident population dynamics for our model and simply assume it for simplicity. 435

### 3.3. Phases of an evolutionary time step 436

To handle the above complication introduced by social development, we partition a unit of evolutionary time in 437  
 three phases: socio-developmental (socio-devo) dynamics, resident population dynamics, and resident-mutant popu- 438  
 lation dynamics (Fig. 3). 439

At the start of the socio-devo dynamics phase of a given evolutionary time  $\tau$ , the population consists of individuals 440  
 all having the same resident genotype, phenotype, and environment. A new individual arises which has identical 441

442 genotype as the resident, but develops a phenotype that may be different from that of the original resident due to social  
443 development. This developed phenotype, its genotype, and its environment are set as the new resident. This process  
444 is repeated until convergence to what we term a “socio-devo stable” (SDS) resident equilibrium or until divergence.  
445 These socio-devo dynamics are formally described by Eq. (S1) and illustrated in Fig. 2A. If development is not social,  
446 the resident is trivially SDS so the socio-devo dynamics phase is unnecessary. If an SDS resident is achieved, the  
447 population moves to the next phase; if an SDS resident is not achieved, the analysis stops. We thus study only the  
448 evolutionary dynamics of SDS resident geno-envo-phenotypes. More specifically, we say a geno-envo-phenotype  
449  $\bar{\mathbf{m}} = (\bar{\mathbf{x}}; \bar{\mathbf{y}}; \bar{\boldsymbol{\epsilon}})$  is a socio-devo equilibrium if and only if  $\bar{\mathbf{x}}$  is produced by development when the individual has such  
450 genotype  $\bar{\mathbf{y}}$  and everyone else in the population has that same genotype, phenotype, and environment (Eq. S2). A  
451 socio-devo equilibrium  $\bar{\mathbf{m}} = (\bar{\mathbf{x}}; \bar{\mathbf{y}}; \bar{\boldsymbol{\epsilon}})$  is locally stable (i.e., SDS) if and only if a marginally small deviation in the  
452 initial phenotype  $\bar{\mathbf{x}}(1)$  from the socio-devo equilibrium keeping the same genotype leads the socio-devo dynamics  
453 (Eq. S1) to the same equilibrium. A socio-devo equilibrium  $\bar{\mathbf{m}}$  is locally stable if all the eigenvalues of the matrix

$$\left. \frac{d\mathbf{x}}{d\bar{\mathbf{x}}^\tau} \right|_{\mathbf{y}=\bar{\mathbf{y}}}$$

454 have absolute value (or modulus) strictly less than one. For instance, this is always the case if social interactions  
455 are only among peers (i.e., individuals of the same age) so the mutant phenotype at a given age depends only on the  
456 phenotype of immediately younger social partners (in which case the above matrix is block upper triangular so all its  
457 eigenvalues are zero; Eq. G9). We assume that there is a unique SDS geno-envo-phenotype for a given developmental  
458 map at every evolutionary time  $\tau$ .

459 If an SDS resident is achieved in the socio-devo dynamics phase, the population moves to the resident population  
460 dynamics phase. Because the resident is SDS, an individual with resident genotype developing in the context of the  
461 resident geno-phenotype is guaranteed to develop the resident phenotype. Thus, we may proceed with the standard  
462 invasion analysis. Hence, in this phase of SDS resident population dynamics, the SDS resident undergoes density  
463 dependent population dynamics, which we assume asymptotically converges to a carrying capacity.

464 Once the SDS resident has achieved carrying capacity, the population moves to the resident-mutant population  
465 dynamics phase. At the start of this phase, a random mutant genotype  $\mathbf{y}$  marginally different from the resident genotype  
466  $\bar{\mathbf{y}}$  arises in a vanishingly small number of mutants. We assume that the mutant becomes either lost or fixed in the  
467 population (Geritz et al., 2002; Geritz, 2005; Priklopil and Lehmann, 2020), establishing a new resident geno-envo-  
468 phenotype.

469 Repeating this evolutionary time step generates long term evolutionary dynamics of an SDS geno-envo-phenotype.

#### 470 3.4. Invasion fitness in age structured populations

471 We now write a well-known first-order approximation of invasion fitness for age-structured populations. To do  
472 this, we first write a mutant’s survival probability and fertility at each age. At the resident population dynamics

equilibrium, the mutant's fertility at age  $a$  is

$$f_a = f_a(\mathbf{m}_a, \bar{\mathbf{m}}) \quad (4a)$$

and the mutant's survival probability from age  $a$  to  $a + 1$  is

$$p_a = p_a(\mathbf{m}_a, \bar{\mathbf{m}}). \quad (4b)$$

The first argument  $\mathbf{m}_a$  in Eqs. (4) is the direct dependence of the mutant's fertility and survival at a given age on her own geno-envo-phenotype at that age. The second argument  $\bar{\mathbf{m}}$  in Eqs. (4) is the direct dependence on social partners' geno-envo-phenotype at any age (thus, fertility and survival may directly depend on the environment of social partners, specifically, as it may affect the carrying capacity, and fertility and survival are density dependent). In the Supplementary Information section S2.3, we recover the well-known result that invasion fitness  $\lambda$  for age-structured populations is to first-order of approximation around resident genotypic traits equal to the relative fitness  $w$  of a mutant individual per unit of generation time, that is  $\lambda \approx w$  (Eq. S21), where

$$w = \sum_{j=1}^{N_a} w_j, \quad (5a)$$

a mutant's relative fitness at age  $j$  is

$$w_j = \frac{1}{T} (\phi_j f_j + \pi_j p_j), \quad (5b)$$

and generation time is

$$T = \sum_{j=1}^{N_a} j \ell_j^\circ f_j^\circ \quad (6)$$

(Charlesworth 1994, Eq. 1.47c; Bulmer 1994, Eq. 25, Ch. 25; Bienvenu and Legendre 2015, Eqs. 5 and 12). The superscript  $\circ$  denotes evaluation at  $\mathbf{y} = \bar{\mathbf{y}}$  (so at  $\mathbf{m} = \bar{\mathbf{m}}$  as the resident is a socio-devo equilibrium). The quantity  $\ell_j = \prod_{k=1}^{j-1} p_k$  is the survivorship of mutants from age 1 to age  $j$ , and  $\ell_j^\circ$  is that of neutral mutants. We denote the force of selection on fertility at age  $j$  (Hamilton 1966 and Caswell 1978, his Eqs. 11 and 12) as

$$\phi_j(\bar{\mathbf{m}}) = \ell_j^\circ \quad (7a)$$

and the force of selection on survival at age  $j$  as

$$\pi_j(\bar{\mathbf{m}}) = \frac{1}{p_j^\circ} \sum_{k=j+1}^{N_a} \ell_k^\circ f_k^\circ, \quad (7b)$$

which are independent of mutant trait values because they are evaluated at the resident trait values. It is easily checked that  $\phi_j$  and  $\pi_j$  decrease with  $j$  (respectively, if  $p_j^\circ < 1$  and  $f_{j+1}^\circ > 0$  provided that  $p_j^\circ$  does not change too abruptly with age).

492 Invasion fitness in our age-structured population can also be written in terms of a mutant’s expected lifetime  
493 reproductive success because of our assumption that mutants arise when residents are at carrying capacity (Mylius  
494 and Diekmann, 1995). Specifically, invasion fitness for age-structured populations with mutants arising at carrying  
495 capacity is to first-order of approximation around resident genotypic traits given by  $\lambda \approx 1 + (R_0 - 1)/T$  (Eq. S23), where  
496  $R_0$  is a mutant’s expected lifetime reproductive success. For our life cycle, a mutant’s expected lifetime reproductive  
497 success is

$$R_0 = \sum_{j=1}^{N_a} \ell_j f_j, \quad (8)$$

498 (Caswell, 2001).

#### 499 **4. The layers of the evo-devo process**

500 We use the model above to obtain three main results. First, we obtain formulas for the total selection gradient of  
501 the genotype and underlying equations. Second, we obtain formulas and underlying equations for the evolutionary  
502 dynamics in gradient form for the phenotype and environment, which if considered on their own yield an underde-  
503 termined and so dynamically insufficient evolutionary system. Third, we obtain formulas and underlying equations  
504 for the evolutionary dynamics in gradient form for the geno-phenotype and the geno-envo-phenotype, which if con-  
505 sidered on their own yield a determined and so dynamically sufficient system. These results provide formulas for  
506 genetic covariation and other high-level quantities from low-level mechanistic processes. We term the resulting set of  
507 equations the “evo-devo process”. The evo-devo process can be arranged in a layered structure, where each layer is  
508 formed by components in layers below (Fig. 4). This layered structure helps see how complex interactions between  
509 variables involved in genetic covariation are formed by building blocks describing the direct interaction between vari-  
510 ables. We thus present the evo-devo process starting from the lowest-level layer up to the highest. The three main  
511 results highlighted above are given in the top layers 6 and 7, and the underlying equations are given in the lower level  
512 layers 2-5. The derivations of these equations are provided in the Appendices and involve recurrent use of the chain  
513 rule due to the recurrence and feedbacks involved in the developmental constraint (1).

##### 514 *4.1. Layer 1: elementary components*

515 The components of the evo-devo process can be calculated from ten elementary components. These include five  
516 “core” elementary components: the fertility  $f_a(\mathbf{m}_a, \bar{\mathbf{m}})$ , survival probability  $p_a(\mathbf{m}_a, \bar{\mathbf{m}})$ , developmental map  $\mathbf{g}_a(\mathbf{m}_a, \bar{\mathbf{z}})$ ,  
517 and environmental map  $\mathbf{h}_a(\mathbf{z}_a, \bar{\mathbf{z}}, \tau)$  for all ages  $a$ , as well as the mutational covariance matrix  $\mathbf{H}_y$  (Fig. 4, Layer 1). The  
518 remaining five elementary components of the evo-devo process are the mutation rate  $\mu$  and the initial conditions for  
519 the various dynamical processes, namely, the evolutionarily initial resident genotype  $\bar{\mathbf{y}}(\tau = 1)$ , the developmentally  
520 initial resident phenotype  $\bar{\mathbf{x}}_1$ , the population density  $\bar{n}_1^*$  at carrying capacity of initial-age residents, and the socio-  
521 devo initial resident phenotype  $\bar{\mathbf{x}}(\theta = 1)$ . Once the five core elementary components are available, either from purely

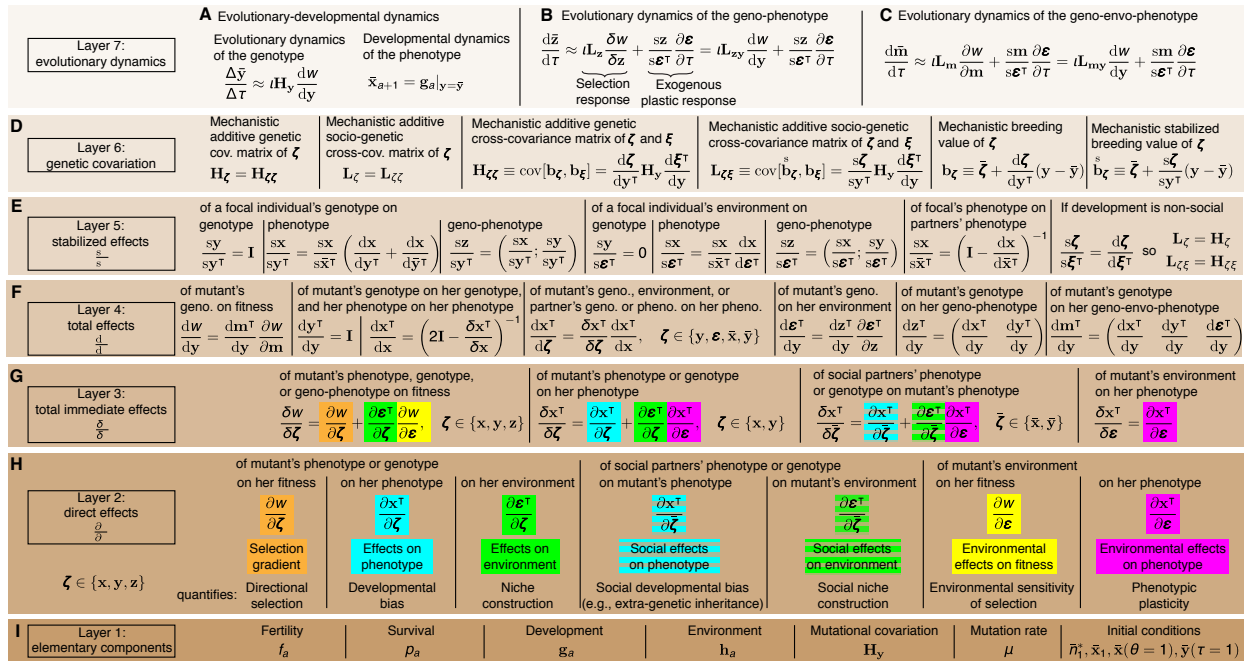

Figure 4: The evo-devo process and its layered structure. Here we summarize the equations composing the evo-devo process arranged in a layered structure. Each layer is formed by components in layers below. Layer 7 describes the evolutionary dynamics as (A) evo-devo dynamics, which in the limit as  $\Delta\tau \rightarrow 0$  implies (B) the evolutionary dynamics of the geno-phenotype, and (C) the evolutionary dynamics of the geno-envo-phenotype. (D) Layer 6 describes genetic covariation. (E) Layer 5 describes stabilized effects (total derivatives over life after socio-devo stabilization, denoted by  $s/s$ ). (F) Layer 4 describes total effects (total derivatives over life before socio-devo stabilization, denoted by  $d/d$ ). (G) Layer 3 describes total immediate effects (total derivatives at the current age, denoted by  $\delta/\delta$ ). (H) Layer 2 describes direct effects (partial derivatives, denoted by  $\partial/\partial$ ). (I) Layer 1 comprises the elementary components of the evo-devo process that generate all layers above. All derivatives are evaluated at  $\mathbf{y} = \bar{\mathbf{y}}$ . See text for the equations of direct-effect matrices, which have structure due to age structure. See Fig. 1 and Table 1 for the meaning of symbols.

theoretical models or using empirical data, all the remaining layers of the evo-devo process can be derived. The remaining elementary components are then needed to compute the solution of the evo-devo dynamics. The five core elementary components except for  $\mathbf{H}_y$  correspond to the elementary components of physiologically structured models of population dynamics (de Roos, 1997).

#### 4.2. Layer 2: direct effects

We now write the equations for the next layer, that of the direct-effect matrices which constitute nearly elementary components of the evo-devo process. Direct-effect matrices measure the direct effect that a variable has on another variable. Direct-effect matrices capture various effects of age structure, including the declining forces of selection as age advances.

Direct-effect matrices include direct selection gradients, which have the following structure due to age-structure.

532 The *direct selection gradient of the phenotype, genotype, or environment* is

$$\begin{aligned} \frac{\partial w}{\partial \zeta} \Big|_{\mathbf{y}=\bar{\mathbf{y}}} &\equiv \left( \frac{\partial w}{\partial \zeta_1}; \dots; \frac{\partial w}{\partial \zeta_{N_a}} \right) \Big|_{\mathbf{y}=\bar{\mathbf{y}}} \\ &= \left( \frac{\partial w_1}{\partial \zeta_1}; \dots; \frac{\partial w_{N_a}}{\partial \zeta_{N_a}} \right) \Big|_{\mathbf{y}=\bar{\mathbf{y}}}, \end{aligned} \quad (\text{Layer 2, Eq. 1})$$

533 for  $\zeta \in \{\mathbf{x}, \mathbf{y}, \boldsymbol{\epsilon}\}$ , with dimensions for  $\partial w / \partial \mathbf{x} |_{\mathbf{y}=\bar{\mathbf{y}}} \in \mathbb{R}^{N_a N_p \times 1}$ ,  $\partial w / \partial \mathbf{y} |_{\mathbf{y}=\bar{\mathbf{y}}} \in \mathbb{R}^{N_a N_g \times 1}$ , and  $\partial w / \partial \boldsymbol{\epsilon} |_{\mathbf{y}=\bar{\mathbf{y}}} \in \mathbb{R}^{N_a N_e \times 1}$ . These  
 534 gradients measure direct directional selection on the phenotype, genotype, or environment, respectively. Analogously,  
 535 Lande's (1979) selection gradient measures direct directional selection under quantitative genetics assumptions. Also,  
 536 the direct selection gradient of the environment measures the environmental sensitivity of selection (Chevin et al.,  
 537 2010). The block entries of Layer 2, Eq. 1 can be computed by differentiating Eq. (5b). Note that the second line  
 538 in Layer 2, Eq. 1 takes the derivative of fitness at each age, so from Eq. (5b) each block entry in Layer 2, Eq. 1 is  
 539 weighted by the forces of selection at each age. Thus, the selection gradients in Layer 2, Eq. 1 capture the declining  
 540 forces of selection in that increasingly rightward block entries have smaller magnitude if survival and fertility effects  
 541 are of the same magnitude as age increases.

542 We use the above definitions to form the following aggregate direct selection gradients. The *direct selection*  
 543 *gradient of the geno-phenotype* is

$$\frac{\partial w}{\partial \mathbf{z}} \Big|_{\mathbf{y}=\bar{\mathbf{y}}} \equiv \left( \frac{\partial w}{\partial \mathbf{x}}; \frac{\partial w}{\partial \mathbf{y}} \right) \Big|_{\mathbf{y}=\bar{\mathbf{y}}} \in \mathbb{R}^{N_a(N_p+N_g) \times 1},$$

544 and the *direct selection gradient of the geno-envo-phenotype* is

$$\frac{\partial w}{\partial \mathbf{m}} \Big|_{\mathbf{y}=\bar{\mathbf{y}}} \equiv \left( \frac{\partial w}{\partial \mathbf{x}}; \frac{\partial w}{\partial \mathbf{y}}; \frac{\partial w}{\partial \boldsymbol{\epsilon}} \right) \Big|_{\mathbf{y}=\bar{\mathbf{y}}} \in \mathbb{R}^{N_a(N_p+N_g+N_e) \times 1}.$$

545 Direct-effect matrices also include matrices that measure direct developmental bias. These matrices have specific,  
 546 sparse structure due to *the arrow of developmental time*: changing a trait at a given age cannot have effects on the  
 547 developmental past of the individual and only directly affects the developmental present or immediate future. Using  
 548 matrix calculus notation (Appendix A), the block matrix of *direct effects of a mutant's phenotype on her phenotype*  
 549 is

$$\frac{\partial \mathbf{x}^T}{\partial \mathbf{x}} \Big|_{\mathbf{y}=\bar{\mathbf{y}}} \equiv \left( \begin{array}{ccc} \frac{\partial \mathbf{x}_1^T}{\partial \mathbf{x}_1} & \dots & \frac{\partial \mathbf{x}_{N_a}^T}{\partial \mathbf{x}_1} \\ \vdots & \ddots & \vdots \\ \frac{\partial \mathbf{x}_1^T}{\partial \mathbf{x}_{N_a}} & \dots & \frac{\partial \mathbf{x}_{N_a}^T}{\partial \mathbf{x}_{N_a}} \end{array} \right) \Big|_{\mathbf{y}=\bar{\mathbf{y}}}$$

$$= \left( \begin{array}{ccccc} \mathbf{I} & \frac{\partial \mathbf{x}_2^\top}{\partial \mathbf{x}_1} & \dots & \mathbf{0} & \mathbf{0} \\ \mathbf{0} & \mathbf{I} & \dots & \mathbf{0} & \mathbf{0} \\ \vdots & \vdots & \ddots & \vdots & \vdots \\ \mathbf{0} & \mathbf{0} & \dots & \mathbf{I} & \frac{\partial \mathbf{x}_{N_a}^\top}{\partial \mathbf{x}_{N_a-1}} \\ \mathbf{0} & \mathbf{0} & \dots & \mathbf{0} & \mathbf{I} \end{array} \right)_{\mathbf{y}=\bar{\mathbf{y}}} \in \mathbb{R}^{N_a N_p \times N_a N_p}, \quad (\text{Layer 2, Eq. 2a})$$

which can be understood as measuring direct developmental bias from the phenotype. The equality (Layer 2, Eq. 2a) follows because the direct effects of a mutant's phenotype on her phenotype are only non-zero at the next age (from the developmental constraint in Eq. 1) or when the phenotypes are differentiated with respect to themselves. The block entries of Layer 2, Eq. 2a can be computed by differentiating the developmental constraint (1). Analogously, the block matrix of *direct effects of a mutant's genotype on her phenotype* is

$$\frac{\partial \mathbf{x}^\top}{\partial \mathbf{y}} \Big|_{\mathbf{y}=\bar{\mathbf{y}}} = \left( \begin{array}{ccccc} \mathbf{0} & \frac{\partial \mathbf{x}_2^\top}{\partial \mathbf{y}_1} & \dots & \mathbf{0} & \mathbf{0} \\ \mathbf{0} & \mathbf{0} & \dots & \mathbf{0} & \mathbf{0} \\ \vdots & \vdots & \ddots & \vdots & \vdots \\ \mathbf{0} & \mathbf{0} & \dots & \mathbf{0} & \frac{\partial \mathbf{x}_{N_a}^\top}{\partial \mathbf{y}_{N_a-1}} \\ \mathbf{0} & \mathbf{0} & \dots & \mathbf{0} & \mathbf{0} \end{array} \right)_{\mathbf{y}=\bar{\mathbf{y}}} \in \mathbb{R}^{N_a N_g \times N_a N_p}, \quad (\text{Layer 2, Eq. 2b})$$

which can be understood as measuring direct developmental bias from the genotype. Note that the main block diagonal is zero.

Direct-effect matrices also include matrices measuring direct plasticity and direct niche construction. Indeed, the block matrix of *direct effects of a mutant's environment on her phenotype* is

$$\frac{\partial \mathbf{x}^\top}{\partial \boldsymbol{\epsilon}} \Big|_{\mathbf{y}=\bar{\mathbf{y}}} = \left( \begin{array}{ccccc} \mathbf{0} & \frac{\partial \mathbf{x}_2^\top}{\partial \boldsymbol{\epsilon}_1} & \dots & \mathbf{0} & \mathbf{0} \\ \mathbf{0} & \mathbf{0} & \dots & \mathbf{0} & \mathbf{0} \\ \vdots & \vdots & \ddots & \vdots & \vdots \\ \mathbf{0} & \mathbf{0} & \dots & \mathbf{0} & \frac{\partial \mathbf{x}_{N_a}^\top}{\partial \boldsymbol{\epsilon}_{N_a-1}} \\ \mathbf{0} & \mathbf{0} & \dots & \mathbf{0} & \mathbf{0} \end{array} \right)_{\mathbf{y}=\bar{\mathbf{y}}} \in \mathbb{R}^{N_a N_e \times N_a N_p}, \quad (\text{Layer 2, Eq. 2c})$$

which can be understood as measuring the direct plasticity of the phenotype (Noble et al., 2019). In turn, the block

560 matrix of *direct effects of a mutant's phenotype or genotype on her environment* is

$$\frac{\partial \boldsymbol{\epsilon}^T}{\partial \boldsymbol{\zeta}} \Big|_{\mathbf{y}=\bar{\mathbf{y}}} = \begin{pmatrix} \frac{\partial \boldsymbol{\epsilon}_1^T}{\partial \zeta_1} & \mathbf{0} & \cdots & \mathbf{0} & \mathbf{0} \\ \mathbf{0} & \frac{\partial \boldsymbol{\epsilon}_2^T}{\partial \zeta_2} & \cdots & \mathbf{0} & \mathbf{0} \\ \vdots & \vdots & \ddots & \vdots & \vdots \\ \mathbf{0} & \mathbf{0} & \cdots & \frac{\partial \boldsymbol{\epsilon}_{N_a-1}^T}{\partial \zeta_{N_a-1}} & \mathbf{0} \\ \mathbf{0} & \mathbf{0} & \cdots & \mathbf{0} & \frac{\partial \boldsymbol{\epsilon}_{N_a}^T}{\partial \zeta_{N_a}} \end{pmatrix} \Big|_{\mathbf{y}=\bar{\mathbf{y}}} \quad (\text{Layer 2, Eq. 2d})$$

561 for  $\boldsymbol{\zeta} \in \{\mathbf{x}, \mathbf{y}\}$ , which can be understood as measuring direct niche construction by the phenotype or genotype. The  
 562 equality (Layer 2, Eq. 2d) follows from the environmental constraint in Eq. (2) since the environment faced by a  
 563 mutant at a given age is directly affected by the mutant phenotype or genotype at the same age only (i.e.,  $\partial \boldsymbol{\epsilon}_j^T / \partial \zeta_a = \mathbf{0}$   
 564 for  $a \neq j$ ).

565 Direct-effect matrices also include a matrix describing direct mutual environmental dependence. This is measured  
 566 by the block matrix of *direct effects of a mutant's environment on itself*

$$\frac{\partial \boldsymbol{\epsilon}^T}{\partial \boldsymbol{\epsilon}} \Big|_{\mathbf{y}=\bar{\mathbf{y}}} = \begin{pmatrix} \frac{\partial \boldsymbol{\epsilon}_1^T}{\partial \boldsymbol{\epsilon}_1} & \mathbf{0} & \cdots & \mathbf{0} & \mathbf{0} \\ \mathbf{0} & \frac{\partial \boldsymbol{\epsilon}_2^T}{\partial \boldsymbol{\epsilon}_2} & \cdots & \mathbf{0} & \mathbf{0} \\ \vdots & \vdots & \ddots & \vdots & \vdots \\ \mathbf{0} & \mathbf{0} & \cdots & \frac{\partial \boldsymbol{\epsilon}_{N_a-1}^T}{\partial \boldsymbol{\epsilon}_{N_a-1}} & \mathbf{0} \\ \mathbf{0} & \mathbf{0} & \cdots & \mathbf{0} & \frac{\partial \boldsymbol{\epsilon}_{N_a}^T}{\partial \boldsymbol{\epsilon}_{N_a}} \end{pmatrix} \Big|_{\mathbf{y}=\bar{\mathbf{y}}} \\ = \mathbf{I} \in \mathbb{R}^{N_a N_c \times N_a N_c}. \quad (\text{Layer 2, Eq. 3})$$

567 The first equality follows from the environmental constraint (Eq. 2) and the second equality follows from our assump-  
 568 tion that environmental traits are mutually independent, so  $\partial \boldsymbol{\epsilon}_a^T / \partial \boldsymbol{\epsilon}_a |_{\mathbf{y}=\bar{\mathbf{y}}} = \mathbf{I}$  for all  $a \in \{1, \dots, N_a\}$ . It is conceptually  
 569 useful to write  $\partial \boldsymbol{\epsilon}^T / \partial \boldsymbol{\epsilon} |_{\mathbf{y}=\bar{\mathbf{y}}}$  rather than only  $\mathbf{I}$ , and we do so throughout.

570 Additionally, direct-effect matrices include matrices describing direct social developmental bias, which includes  
 571 the direct effects of extra-genetic inheritance and indirect genetic effects. The block matrix of *direct effects of social*  
 572 *partners' phenotype or genotype on a mutant's phenotype* is

$$\frac{\partial \mathbf{x}^T}{\partial \boldsymbol{\zeta}} \Big|_{\mathbf{y}=\bar{\mathbf{y}}} = \begin{pmatrix} \mathbf{0} & \frac{\partial \mathbf{x}_2^T}{\partial \zeta_1} & \cdots & \frac{\partial \mathbf{x}_{N_a}^T}{\partial \zeta_1} \\ \mathbf{0} & \frac{\partial \mathbf{x}_2^T}{\partial \zeta_2} & \cdots & \frac{\partial \mathbf{x}_{N_a}^T}{\partial \zeta_2} \\ \vdots & \vdots & \ddots & \vdots \\ \mathbf{0} & \frac{\partial \mathbf{x}_2^T}{\partial \zeta_{N_a}} & \cdots & \frac{\partial \mathbf{x}_{N_a}^T}{\partial \zeta_{N_a}} \end{pmatrix} \Big|_{\mathbf{y}=\bar{\mathbf{y}}}, \quad (\text{Layer 2, Eq. 4})$$



for  $\bar{\zeta} \in \{\bar{\mathbf{x}}, \bar{\mathbf{y}}\}$ , where the equality follows because the phenotype  $\mathbf{x}_1$  at the initial age is constant by assumption. The matrix in Layer 2, Eq. 4 can be understood as measuring direct social developmental bias from either the phenotype or genotype, and mechanistically measures the direct effects of extra-genetic inheritance and indirect genetic effects. This matrix can be less sparse than direct-effect matrices above because the mutant's phenotype can be affected by the phenotype or genotype of social partners of *any* age.

Direct-effect matrices also include matrices describing direct social niche construction. The block matrix of *direct effects of social partners' phenotype or genotype on a mutant's environment* is

$$\frac{\partial \boldsymbol{\epsilon}^T}{\partial \bar{\zeta}} \Big|_{\mathbf{y}=\bar{\mathbf{y}}} \equiv \left( \begin{array}{ccc} \frac{\partial \boldsymbol{\epsilon}_1^T}{\partial \bar{\zeta}_1} & \dots & \frac{\partial \boldsymbol{\epsilon}_{N_a}^T}{\partial \bar{\zeta}_1} \\ \vdots & \ddots & \vdots \\ \frac{\partial \boldsymbol{\epsilon}_1^T}{\partial \bar{\zeta}_{N_a}} & \dots & \frac{\partial \boldsymbol{\epsilon}_{N_a}^T}{\partial \bar{\zeta}_{N_a}} \end{array} \right) \Big|_{\mathbf{y}=\bar{\mathbf{y}}}, \quad (\text{Layer 2, Eq. 5})$$

for  $\bar{\zeta} \in \{\bar{\mathbf{x}}, \bar{\mathbf{y}}\}$ , which can be understood as measuring direct social niche construction by either the phenotype or genotype. This matrix does not contain any zero entries in general because the mutant's environment at any age can be affected by the phenotype or genotype of social partners of any age.

We use the above definitions to form direct-effect matrices involving the geno-phenotype. The block matrix of *direct effects of a mutant's geno-phenotype on her geno-phenotype* is

$$\frac{\partial \mathbf{z}^T}{\partial \mathbf{z}} \Big|_{\mathbf{y}=\bar{\mathbf{y}}} \equiv \left( \begin{array}{cc} \frac{\partial \mathbf{x}^T}{\partial \mathbf{x}} & \frac{\partial \mathbf{y}^T}{\partial \mathbf{x}} \\ \frac{\partial \mathbf{x}^T}{\partial \mathbf{y}} & \frac{\partial \mathbf{y}^T}{\partial \mathbf{y}} \end{array} \right) \Big|_{\mathbf{y}=\bar{\mathbf{y}}} = \left( \begin{array}{c} \frac{\partial \mathbf{x}^T}{\partial \mathbf{x}} \quad \mathbf{0} \\ \frac{\partial \mathbf{x}^T}{\partial \mathbf{y}} \quad \mathbf{I} \end{array} \right) \Big|_{\mathbf{y}=\bar{\mathbf{y}}} \in \mathbb{R}^{N_a(N_p+N_g) \times N_a(N_p+N_g)}, \quad (\text{Layer 2, Eq. 6})$$

which measures direct developmental bias of the geno-phenotype, and where the equality follows because genotypic traits are developmentally independent by assumption. The block matrix of *direct effects of a mutant's geno-phenotype on her environment* is

$$\frac{\partial \boldsymbol{\epsilon}^T}{\partial \mathbf{z}} \Big|_{\mathbf{y}=\bar{\mathbf{y}}} \equiv \left( \frac{\partial \boldsymbol{\epsilon}^T}{\partial \mathbf{x}}; \frac{\partial \boldsymbol{\epsilon}^T}{\partial \mathbf{y}} \right) \Big|_{\mathbf{y}=\bar{\mathbf{y}}} \in \mathbb{R}^{N_a(N_p+N_g) \times N_a N_e}, \quad (\text{Layer 2, Eq. 7})$$

which measures direct niche construction by the geno-phenotype. The block matrix of *direct effects of social partners' geno-phenotypes on a mutant's environment* is

$$\frac{\partial \boldsymbol{\epsilon}^T}{\partial \bar{\mathbf{z}}} \Big|_{\mathbf{y}=\bar{\mathbf{y}}} \equiv \left( \frac{\partial \boldsymbol{\epsilon}^T}{\partial \bar{\mathbf{x}}}; \frac{\partial \boldsymbol{\epsilon}^T}{\partial \bar{\mathbf{y}}} \right) \Big|_{\mathbf{y}=\bar{\mathbf{y}}} \in \mathbb{R}^{N_a(N_p+N_g) \times N_a N_e}, \quad (\text{Layer 2, Eq. 8})$$

which measures direct social niche construction by partners' geno-phenotypes. The block matrix of *direct effects of a mutant's environment on her geno-phenotype* is

$$\frac{\partial \mathbf{z}^T}{\partial \boldsymbol{\epsilon}} \Big|_{\mathbf{y}=\bar{\mathbf{y}}} \equiv \left( \frac{\partial \mathbf{x}^T}{\partial \boldsymbol{\epsilon}} \quad \frac{\partial \mathbf{y}^T}{\partial \boldsymbol{\epsilon}} \right) \Big|_{\mathbf{y}=\bar{\mathbf{y}}} = \left( \frac{\partial \mathbf{x}^T}{\partial \boldsymbol{\epsilon}} \quad \mathbf{0} \right) \Big|_{\mathbf{y}=\bar{\mathbf{y}}} \in \mathbb{R}^{N_a N_e \times N_a(N_p+N_g)}, \quad (\text{Layer 2, Eq. 9})$$

592 which measures the direct plasticity of the geno-phenotype, and where the equality follows because genotypic traits  
593 are developmentally independent.

594 We will see that the evolutionary dynamics of the environment depends on a matrix measuring “inclusive” direct  
595 niche construction. This matrix is the transpose of the matrix of *direct social effects of a focal individual’s geno-*  
596 *phenotype on hers and her partners’ environment*

$$\frac{\partial(\boldsymbol{\epsilon} + \check{\boldsymbol{\epsilon}})}{\partial \mathbf{z}^T} \Big|_{\mathbf{y}=\bar{\mathbf{y}}} = \left( \frac{\partial \boldsymbol{\epsilon}}{\partial \mathbf{z}^T} + \frac{\partial \check{\boldsymbol{\epsilon}}}{\partial \mathbf{z}^T} \right) \Big|_{\mathbf{y}=\bar{\mathbf{y}}} \in \mathbb{R}^{N_a N_e \times N_a(N_p + N_g)}, \quad (\text{Layer 2, Eq. 10})$$

597 where we denote by  $\check{\boldsymbol{\epsilon}}$  the environment a resident experiences when she develops in the context of mutants (a donor  
598 perspective for the mutant). Thus, this matrix can be interpreted as inclusive direct niche construction by the geno-  
599 phenotype. Note that the second term on the right-hand side of Layer 2, Eq. 10 is the direct effects of social partners’  
600 geno-phenotypes on a focal mutant (a recipient perspective for the mutant). Hence, inclusive direct niche construction  
601 by the geno-phenotype as described by Layer 2, Eq. 10 can be equivalently interpreted either from a donor or a  
602 recipient perspective.

#### 603 4.3. Layer 3: total immediate effects

604 We now proceed to write the equations of the next layer of the evo-devo process, that of total immediate effects.  
605 Total-immediate-effect matrices measure the total effects that a variable has on another variable only at a given age,  
606 thus without considering the downstream effects over development. With the developmental and environmental con-  
607 straints assumed, if there are no environmental traits, total immediate effect matrices ( $\delta \zeta^T / \delta \xi$ ) reduce to direct effect  
608 matrices ( $\partial \zeta^T / \partial \xi$ ).

609 Total-immediate-effect matrices include total immediate selection gradients, which capture some of the effects of  
610 niche construction. The *total immediate selection gradient of the phenotype, genotype, or geno-phenotype* is

$$\frac{\delta w}{\delta \zeta} \Big|_{\mathbf{y}=\bar{\mathbf{y}}} = \left( \frac{\partial w}{\partial \zeta} + \frac{\partial \boldsymbol{\epsilon}^T}{\partial \zeta} \frac{\partial w}{\partial \boldsymbol{\epsilon}} \right) \Big|_{\mathbf{y}=\bar{\mathbf{y}}}, \quad (\text{Layer 3, Eq. 1})$$

611 for  $\zeta \in \{\mathbf{x}, \mathbf{y}, \mathbf{z}\}$ . Here, the total immediate selection gradient of  $\zeta$  depends on direct directional selection on  $\zeta$ , direct  
612 niche construction by  $\zeta$ , and direct environmental sensitivity of selection. Thus, total immediate selection gradients  
613 measure total immediate directional selection, which is directional selection in the fitness landscape modified by the  
614 interaction of niche construction and environmental sensitivity of selection. In a standard quantitative genetics frame-  
615 work, the total immediate selection gradients correspond to Lande’s (1979) selection gradient if the environmental  
616 traits are not explicitly included in the analysis.

617 Total immediate selection on the environment equals direct selection on the environment because we assume  
618 environmental traits are mutually independent. The *total immediate selection gradient of the environment* is

$$\frac{\delta w}{\delta \boldsymbol{\epsilon}} \Big|_{\mathbf{y}=\bar{\mathbf{y}}} = \left( \frac{\partial \boldsymbol{\epsilon}^T}{\partial \boldsymbol{\epsilon}} \frac{\partial w}{\partial \boldsymbol{\epsilon}} \right) \Big|_{\mathbf{y}=\bar{\mathbf{y}}} \in \mathbb{R}^{N_a N_e \times 1}. \quad (\text{Layer 3, Eq. 2})$$

Given our assumption that environmental traits are mutually independent, the matrix of direct effects of the environment on itself is the identity matrix. Thus, the total immediate selection gradient of the environment equals the selection gradient of the environment.

Total-immediate-effect matrices also include matrices describing total immediate developmental bias, which capture additional effects of niche construction. The block matrix of *total immediate effects of the phenotype, genotype, social partner's phenotype, or social partner's genotype on a mutant's phenotype* is

$$\left. \frac{\delta \mathbf{x}^T}{\delta \zeta} \right|_{\mathbf{y}=\bar{\mathbf{y}}} = \left( \frac{\partial \mathbf{x}^T}{\partial \zeta} + \frac{\partial \boldsymbol{\epsilon}^T}{\partial \zeta} \frac{\partial \mathbf{x}^T}{\partial \boldsymbol{\epsilon}} \right) \Bigg|_{\mathbf{y}=\bar{\mathbf{y}}}, \quad (\text{Layer 3, Eq. 3})$$

for  $\zeta \in \{\mathbf{x}, \mathbf{y}, \bar{\mathbf{x}}, \bar{\mathbf{y}}\}$ . Here, the total immediate effects of  $\zeta$  on the phenotype depend on the direct developmental bias from  $\zeta$ , direct niche construction by  $\zeta$ , and the direct plasticity of the phenotype. Consequently, total immediate effects on the phenotype can be interpreted as measuring total immediate developmental bias, which measures developmental bias in the developmental process modified by the interaction of niche construction and plasticity.

Moreover, total immediate-effect matrices include matrices describing total immediate plasticity of the phenotype, which equals plasticity of the phenotype because environmental traits are mutually independent by assumption. The block matrix of *total immediate effects of a mutant's environment on her phenotype* is

$$\left. \frac{\delta \mathbf{x}^T}{\delta \boldsymbol{\epsilon}} \right|_{\mathbf{y}=\bar{\mathbf{y}}} = \left. \frac{\partial \boldsymbol{\epsilon}^T}{\partial \boldsymbol{\epsilon}} \frac{\partial \mathbf{x}^T}{\partial \boldsymbol{\epsilon}} \right|_{\mathbf{y}=\bar{\mathbf{y}}} \in \mathbb{R}^{N_a N_e \times N_a N_p}. \quad (\text{Layer 3, Eq. 4})$$

Given our assumption that environmental traits are mutually independent, the matrix of direct effects of the environment on itself is the identity matrix. Thus, the total immediate plasticity of the phenotype equals the direct plasticity of the phenotype.

We use the above definitions to form a matrix quantifying the total immediate developmental bias of the geno-phenotype. This is the block matrix of *total immediate effects of a mutant's geno-phenotype on her geno-phenotype*

$$\left. \frac{\delta \mathbf{z}^T}{\delta \mathbf{z}} \right|_{\mathbf{y}=\bar{\mathbf{y}}} = \left( \frac{\partial \mathbf{z}^T}{\partial \mathbf{z}} + \frac{\partial \boldsymbol{\epsilon}^T}{\partial \mathbf{z}} \frac{\partial \mathbf{z}^T}{\partial \boldsymbol{\epsilon}} \right) \Bigg|_{\mathbf{y}=\bar{\mathbf{y}}} \in \mathbb{R}^{N_a(N_p+N_g) \times N_a(N_p+N_g)}. \quad (\text{Layer 3, Eq. 5})$$

Consequently, the total immediate developmental bias of the geno-phenotype depends on the direct developmental bias of the geno-phenotype, direct niche construction by the geno-phenotype, and direct plasticity of the geno-phenotype.

#### 4.4. Layer 4: total effects

We now move to write the equations for the next layer of the evo-devo process, that of total-effect matrices. Total-effect matrices measure the total effects of a variable on another one over the individual's life, thus considering the downstream effects over development, but before the effects of social development have stabilized in the population. More generally, total-effect matrices include matrices that give the sensitivity to perturbations of the solution of a recurrence of the form (1).

645 The total effects of the phenotype on itself describe the *developmental feedback* of the phenotype. This is given  
 646 by the block matrix of *total effects of a mutant's phenotype on her phenotype*

$$\begin{aligned} \frac{d\mathbf{x}^\top}{d\mathbf{x}} \Big|_{\mathbf{y}=\bar{\mathbf{y}}} &= \left( 2\mathbf{I} - \frac{\delta\mathbf{x}^\top}{\delta\mathbf{x}} \right)^{-1} \Big|_{\mathbf{y}=\bar{\mathbf{y}}} \\ &= \sum_{a=1}^{N_a} \left( \frac{\delta\mathbf{x}^\top}{\delta\mathbf{x}} - \mathbf{I} \right)^{a-1} \Big|_{\mathbf{y}=\bar{\mathbf{y}}} \in \mathbb{R}^{N_a N_p \times N_a N_p}, \end{aligned} \quad (\text{Layer 4, Eq. 1})$$

647 which is always invertible (Appendix B, Eq. B15) and where the last equality follows by the geometric series of  
 648 matrices. This matrix can be interpreted as a lifetime collection of total immediate effects of the phenotype on itself.  
 649 Also, the developmental feedback of the phenotype can be seen as describing the total developmental bias of the  
 650 phenotype. More generally, Layer 4, Eq. 1 gives the sensitivity of the solution  $\mathbf{x}$  of the recurrence (1) to perturbations  
 651 in the solution at other times (ages): in particular,  $dx_{kj}/dx_{ia}$  gives the sensitivity of the solution  $x_{kj}$  of the  $k$ -th variable  
 652 at time  $j$  to perturbations in the solution  $x_{ia}$  of the  $i$ -th variable at time  $a$ . Developmental feedback may cause major  
 653 phenotypic effects at subsequent ages as its block entries involve matrix products. Indeed, the total effects of the  
 654 phenotype at age  $a$  on the phenotype at age  $j$  are given by

$$\frac{d\mathbf{x}_j^\top}{d\mathbf{x}_a} = \begin{cases} \overset{\curvearrowright}{\prod}_{k=a}^{j-1} \frac{\delta\mathbf{x}_{k+1}^\top}{\delta\mathbf{x}_k} = \frac{\delta\mathbf{x}_{a+1}^\top}{\delta\mathbf{x}_a} \dots \frac{\delta\mathbf{x}_j^\top}{\delta\mathbf{x}_{j-1}} & \text{for } j > a \\ \mathbf{I} & \text{for } j = a \\ \mathbf{0} & \text{for } j < a. \end{cases} \quad (\text{Layer 4, Eq. 2})$$

655 Since matrix multiplication is not commutative, the  $\curvearrowright$  denotes right multiplication. By depending on the total im-  
 656 mediate developmental bias from the phenotype, the developmental feedback of the phenotype depends on direct  
 657 developmental bias from the phenotype, direct niche-construction by the phenotype, and direct plasticity of the phe-  
 658 notype (Layer 3, Eq. 3). Layer 4, Eq. 1 has the same form of an equation for total effects used in path analysis (Greene  
 659 1977, p. 380; see also Morrissey 2014, Eq. 2) if  $(\delta\mathbf{x}^\top/\delta\mathbf{x} - \mathbf{I})|_{\mathbf{y}=\bar{\mathbf{y}}}$  is interpreted as a matrix listing the path coefficients  
 660 of “direct” effects of the phenotype on itself (direct, without explicitly considering environmental traits).

661 The total effects of the genotype on the phenotype are a mechanistic analogue of Fisher’s additive effects of allelic  
 662 substitution and of Wagner’s developmental matrix. The block matrix of *total effects of a mutant's genotype on her*  
 663 *phenotype* is given by

$$\frac{d\mathbf{x}^\top}{d\mathbf{y}} \Big|_{\mathbf{y}=\bar{\mathbf{y}}} = \left( \frac{\delta\mathbf{x}^\top}{\delta\mathbf{y}} \frac{d\mathbf{x}^\top}{d\mathbf{x}} \right) \Big|_{\mathbf{y}=\bar{\mathbf{y}}} \in \mathbb{R}^{N_a N_g \times N_a N_p}, \quad (\text{Layer 4, Eq. 3})$$

664 which is singular because the developmentally initial phenotype is not affected by the genotype (by our assumption  
 665 that the initial phenotype is constant) and the developmentally final genotypic traits do not affect the phenotype (by  
 666 our assumption that individuals do not survive after the final age; so  $d\mathbf{x}^\top/d\mathbf{y}|_{\mathbf{y}=\bar{\mathbf{y}}}$  has rows and columns that are zero;  
 667 Appendix C, Eq. C16). From Layer 4, Eq. 3, this matrix can be interpreted as involving a developmentally immediate

pulse caused by a change in genotypic traits followed by the triggered developmental feedback of the phenotype. 668  
 The matrix of total effects of the genotype on the phenotype measures total developmental bias of the phenotype 669  
 from the genotype. By giving the total effects of a perturbation in the genotype on the phenotype, the entries of this 670  
 matrix are a mechanistic analogue of Fisher’s additive effect of allelic substitution, which he defined as regression 671  
 coefficients (his  $\alpha$ ; see Eq. I of Fisher 1918 and p. 72 of Lynch and Walsh 1998). Also, this matrix is a mechanistic 672  
 analogue of Wagner’s (1984, 1989) developmental matrix (his  $\mathbf{B}$ ) (see also Martin 2014), Rice’s (2002) rank-1  $\mathbf{D}$  673  
 tensor, and Morrissey’s (2015) total effect matrix (his  $\Phi$ , but not Morrissey’s (2014)  $\Phi$ , which is a regression-based 674  
 form of  $\mathbf{dx}^T/\mathbf{dx}$ ) (interpreting these authors’ partial derivatives as total derivatives, although using derivatives rather 675  
 than regression coefficients violates the standard partition of phenotypic variance into genetic and “environmental” 676  
 variances, as explained below). More generally, interpreting  $\mathbf{y}$  as parameters affecting the recurrence (1) over  $\mathbf{x}$ , Layer 677  
 4, Eq. 3 gives the sensitivity of the solution  $\mathbf{x}$  to perturbation in the parameters at other times (ages): in particular, 678  
 $dx_{kj}/dy_{ia}$  gives the sensitivity of the solution  $x_{kj}$  of the  $k$ -th variable at time  $j$  to perturbations in the  $i$ -th parameter  $y_{ia}$  at 679  
 time  $a$ . The definition of total effects of the genotype on the phenotype in terms of derivatives (Layer 4, Eq. 3) differs 680  
 from Fisher’s in terms of regression coefficients both in that it reveals its structure and so it can be used for evo-devo 681  
 dynamically sufficient analysis, and in that regression coefficients of phenotype to genotype are uncorrelated with 682  
 residuals whereas the derivative analogues need not be. This implies that the standard partition of phenotypic variance 683  
 in quantitative genetics does not hold with our mechanistic analogues, so a mechanistic analogue of heritability can 684  
 be greater than one (as further explained in Layer 6).

The total effects of the environment on the phenotype measure the total plasticity of the phenotype, considering 686  
 downstream effects over development. This is given by the block matrix of *total effects of a mutant’s environment on* 687  
*her phenotype* 688

$$\left. \frac{\mathbf{dx}^T}{\mathbf{d}\boldsymbol{\epsilon}} \right|_{\mathbf{y}=\bar{\mathbf{y}}} = \left( \frac{\delta \mathbf{x}^T}{\delta \boldsymbol{\epsilon}} \frac{\mathbf{dx}^T}{\mathbf{dx}} \right) \Bigg|_{\mathbf{y}=\bar{\mathbf{y}}} \in \mathbb{R}^{N_a N_c \times N_a N_p}. \quad (\text{Layer 4, Eq. 4})$$

Thus, the total plasticity of the phenotype can be interpreted as a developmentally immediate pulse of plastic change 689  
 in the phenotype followed by the triggered developmental feedback of the phenotype. 690

The total effects of social partners’ genotype or phenotype on the phenotype measure the total *social* developmen- 691  
 tal bias of the phenotype. The block matrix of *total effects of social partners’ phenotype or genotype on a mutant’s* 692  
*phenotype* is 693

$$\left. \frac{\mathbf{dx}^T}{\mathbf{d}\bar{\boldsymbol{\zeta}}} \right|_{\mathbf{y}=\bar{\mathbf{y}}} = \left( \frac{\delta \mathbf{x}^T}{\delta \bar{\boldsymbol{\zeta}}} \frac{\mathbf{dx}^T}{\mathbf{dx}} \right) \Bigg|_{\mathbf{y}=\bar{\mathbf{y}}} \quad (\text{Layer 4, Eq. 5})$$

for  $\bar{\boldsymbol{\zeta}} \in \{\bar{\mathbf{x}}, \bar{\mathbf{y}}\}$ . This matrix can be interpreted as measuring total social developmental bias of the phenotype from 694  
 phenotype or genotype, as well as the total effects on the phenotype of extra-genetic inheritance, and the total in- 695  
 direct genetic effects. In particular, the matrix of total social developmental bias of the phenotype from phenotype, 696  
 $\mathbf{dx}^T/\mathbf{d}\bar{\mathbf{x}}|_{\mathbf{y}=\bar{\mathbf{y}}}$ , is a mechanistic version of the matrix of interaction coefficients in the indirect genetic effects literature 697  
 (i.e.,  $\Psi$  in Eq. 17 of Moore et al. 1997, which is defined as a matrix of regression coefficients). From Layer 4, Eq. 5, 698

699 the total social developmental bias of the phenotype can be interpreted as a developmentally immediate pulse of phe-  
 700 notype change caused by a change in social partners' traits followed by the triggered developmental feedback of the  
 701 mutant's phenotype.

702 The total effects on the genotype are simple since genotypic traits are developmentally independent by assumption.  
 703 The block matrix of *total effects of a mutant's genotype on itself* is

$$\frac{dy^T}{dy} \Big|_{y=\bar{y}} = \mathbf{I} \in \mathbb{R}^{N_a N_g \times N_a N_g}, \quad (\text{Layer 4, Eq. 6})$$

704 and the block matrix of *total effects of a vector*  $\zeta \in \{\mathbf{x}, \boldsymbol{\epsilon}, \bar{\mathbf{x}}, \bar{\mathbf{y}}, \bar{\mathbf{z}}, \bar{\boldsymbol{\epsilon}}, \bar{\mathbf{m}}\}$  on a mutant's genotype is

$$\frac{dy^T}{d\zeta} \Big|_{y=\bar{y}} = \mathbf{0},$$

705 (Appendix C, Eq. C13).

706 We can use some of the previous total-effect matrices to construct the following total-effect matrices involving the  
 707 geno-phenotype. The block matrix of *total effects of a mutant's phenotype on her geno-phenotype* is

$$\begin{aligned} \frac{dz^T}{dx} \Big|_{y=\bar{y}} &\equiv \left( \frac{dx^T}{dx} \quad \frac{dy^T}{dx} \right) \Big|_{y=\bar{y}} \\ &= \left( \frac{dx^T}{dx} \quad \mathbf{0} \right) \Big|_{y=\bar{y}} \in \mathbb{R}^{N_a N_p \times N_a (N_p + N_g)}, \end{aligned} \quad (\text{Layer 4, Eq. 7})$$

708 measuring total developmental bias of the geno-phenotype from the phenotype. The block matrix of *total effects of*  
 709 *the genotype on her geno-phenotype* is

$$\begin{aligned} \frac{dz^T}{dy} \Big|_{y=\bar{y}} &\equiv \left( \frac{dx^T}{dy} \quad \frac{dy^T}{dy} \right) \Big|_{y=\bar{y}} \\ &= \left( \frac{dx^T}{dy} \quad \mathbf{I} \right) \Big|_{y=\bar{y}} \in \mathbb{R}^{N_a N_g \times N_a (N_p + N_g)}, \end{aligned} \quad (\text{Layer 4, Eq. 8})$$

710 measuring total developmental bias of the geno-phenotype from the genotype. This matrix  $dz^T/dy|_{y=\bar{y}}$  is singular  
 711 because any matrix with fewer rows than columns is singular (Horn and Johnson, 2013, p. 14). This singularity will  
 712 be important when we consider mechanistic additive genetic covariances (Layer 6). Now, the block matrix of *total*  
 713 *effects of a mutant's geno-phenotype on her geno-phenotype* is

$$\begin{aligned} \frac{dz^T}{dz} \Big|_{y=\bar{y}} &\equiv \left( \frac{dx^T}{dx} \quad \frac{dy^T}{dx} \right) \Big|_{y=\bar{y}} = \left( \frac{dx^T}{dx} \quad \mathbf{0} \right) \Big|_{y=\bar{y}} \\ &= \left( \frac{dx^T}{dy} \quad \frac{dy^T}{dy} \right) \Big|_{y=\bar{y}} = \left( \frac{dx^T}{dy} \quad \mathbf{I} \right) \Big|_{y=\bar{y}} \\ &= \left( 2\mathbf{I} - \frac{\delta z^T}{\delta z} \right)^{-1} \Big|_{y=\bar{y}} = \sum_{a=1}^{N_a} \left( \frac{\delta z^T}{\delta z} - \mathbf{I} \right)^{a-1} \\ &\in \mathbb{R}^{N_a (N_p + N_g) \times N_a (N_p + N_g)}, \end{aligned} \quad (\text{Layer 4, Eq. 9})$$

714 which can be interpreted as measuring the developmental feedback of the geno-phenotype (Appendix E, Eq. E4).  
 715 Since  $dz^T/dz|_{y=\bar{y}}$  is square and block lower triangular, and since  $dx^T/dx|_{y=\bar{y}}$  is invertible (Appendix B, Eq. B15), we  
 716 have that  $dz^T/dz|_{y=\bar{y}}$  is invertible.

Moreover, the total effects of the phenotype and genotype on the environment quantify total niche construction. 717  
 Total niche construction by the phenotype is quantified by the block matrix of *total effects of a mutant's phenotype on* 718  
*her environment* 719

$$\begin{aligned} \left. \frac{d\boldsymbol{\epsilon}^T}{d\mathbf{x}} \right|_{y=\bar{y}} &= \left( \frac{d\mathbf{x}^T}{d\mathbf{x}} \frac{\partial \boldsymbol{\epsilon}^T}{\partial \mathbf{x}} \right) \Big|_{y=\bar{y}} \\ &= \left( \frac{d\mathbf{z}^T}{d\mathbf{x}} \frac{\partial \boldsymbol{\epsilon}^T}{\partial \mathbf{z}} \right) \Big|_{y=\bar{y}} \in \mathbb{R}^{N_a N_p \times N_a N_e}, \end{aligned} \quad (\text{Layer 4, Eq. 10})$$

which can be interpreted as showing that developmental feedback of the phenotype occurs first and then direct niche- 720  
 constructing effects by the phenotype follow. Similarly, total niche construction by the genotype is quantified by the 721  
 block matrix of *total effects of a mutant's genotype on her environment* 722

$$\begin{aligned} \left. \frac{d\boldsymbol{\epsilon}^T}{d\mathbf{y}} \right|_{y=\bar{y}} &= \left( \frac{d\mathbf{x}^T}{d\mathbf{y}} \frac{\partial \boldsymbol{\epsilon}^T}{\partial \mathbf{x}} + \frac{\partial \boldsymbol{\epsilon}^T}{\partial \mathbf{y}} \right) \Big|_{y=\bar{y}} \\ &= \left( \frac{d\mathbf{z}^T}{d\mathbf{y}} \frac{\partial \boldsymbol{\epsilon}^T}{\partial \mathbf{z}} \right) \Big|_{y=\bar{y}} \in \mathbb{R}^{N_a N_g \times N_a N_e}, \end{aligned} \quad (\text{Layer 4, Eq. 11})$$

which depends on direct niche construction by the genotype and on total developmental bias of the phenotype from 723  
 the genotype followed by niche construction by the phenotype. The analogous relationship holds for total niche 724  
 construction by the geno-phenotype, quantified by the block matrix of *total effects of a mutant's geno-phenotype on* 725  
*her environment* 726

$$\left. \frac{d\boldsymbol{\epsilon}^T}{d\mathbf{z}} \right|_{y=\bar{y}} = \left( \frac{d\mathbf{z}^T}{d\mathbf{z}} \frac{\partial \boldsymbol{\epsilon}^T}{\partial \mathbf{z}} \right) \Big|_{y=\bar{y}} \in \mathbb{R}^{N_a(N_p+N_g) \times N_a N_e}, \quad (\text{Layer 4, Eq. 12})$$

which depends on the developmental feedback of the geno-phenotype and direct niche construction by the geno- 727  
 phenotype. 728

The total effects of the environment on itself quantify environmental feedback. The block matrix of *total effects* 729  
*of a mutant's environment on her environment* is 730

$$\left. \frac{d\boldsymbol{\epsilon}^T}{d\boldsymbol{\epsilon}} \right|_{y=\bar{y}} = \left( \frac{\partial \boldsymbol{\epsilon}^T}{\partial \boldsymbol{\epsilon}} + \frac{d\mathbf{x}^T}{d\boldsymbol{\epsilon}} \frac{\partial \boldsymbol{\epsilon}^T}{\partial \mathbf{x}} \right) \Big|_{y=\bar{y}} \in \mathbb{R}^{N_a N_e \times N_a N_e}, \quad (\text{Layer 4, Eq. 13})$$

which is always invertible (Appendix D, Eq. D5). This matrix can be interpreted as measuring *environmental feed-* 731  
*back*, which depends on direct mutual environmental dependence, total plasticity of the phenotype, and direct niche 732  
 construction by the phenotype. 733

We can also use some of the following previous total-effect matrices to construct the following total-effect matrices 734  
 involving the geno-envo-phenotype. The block matrix of *total effects of a mutant's phenotype on her geno-envo-* 735  
*phenotype* is 736

$$\begin{aligned} \left. \frac{d\mathbf{m}^T}{d\mathbf{x}} \right|_{y=\bar{y}} &\equiv \left( \frac{d\mathbf{x}^T}{d\mathbf{x}} \quad \frac{d\mathbf{y}^T}{d\mathbf{x}} \quad \frac{d\boldsymbol{\epsilon}^T}{d\mathbf{x}} \right) \Big|_{y=\bar{y}} \\ &= \left( \frac{d\mathbf{x}^T}{d\mathbf{x}} \quad \mathbf{0} \quad \frac{d\boldsymbol{\epsilon}^T}{d\mathbf{x}} \right) \Big|_{y=\bar{y}} \end{aligned} \quad (\text{Layer 4, Eq. 14})$$

$$\in \mathbb{R}^{N_a N_p \times N_a (N_p + N_g + N_e)},$$

737 measuring total developmental bias of the geno-envo-phenotype from the phenotype. The block matrix of *total effects*  
738 *of a mutant's genotype on her geno-envo-phenotype* is

$$\begin{aligned} \left. \frac{d\mathbf{m}^T}{d\mathbf{y}} \right|_{\mathbf{y}=\bar{\mathbf{y}}} &\equiv \left( \begin{array}{ccc} \frac{d\mathbf{x}^T}{d\mathbf{y}} & \frac{d\mathbf{y}^T}{d\mathbf{y}} & \frac{d\boldsymbol{\epsilon}^T}{d\mathbf{y}} \end{array} \right) \Big|_{\mathbf{y}=\bar{\mathbf{y}}} \\ &= \left( \begin{array}{ccc} \frac{d\mathbf{x}^T}{d\mathbf{y}} & \mathbf{I} & \frac{d\boldsymbol{\epsilon}^T}{d\mathbf{y}} \end{array} \right) \Big|_{\mathbf{y}=\bar{\mathbf{y}}} & \text{(Layer 4, Eq. 15)} \\ &\in \mathbb{R}^{N_a N_g \times N_a (N_p + N_g + N_e)}, \end{aligned}$$

739 measuring total developmental bias of the geno-envo-phenotype from the genotype, and which is singular because it  
740 has fewer rows than columns.

741 The block matrix of *total effects of a mutant's environment on her geno-envo-phenotype* is

$$\begin{aligned} \left. \frac{d\mathbf{m}^T}{d\boldsymbol{\epsilon}} \right|_{\mathbf{y}=\bar{\mathbf{y}}} &= \left( \begin{array}{ccc} \frac{d\mathbf{x}^T}{d\boldsymbol{\epsilon}} & \frac{d\mathbf{y}^T}{d\boldsymbol{\epsilon}} & \frac{d\boldsymbol{\epsilon}^T}{d\boldsymbol{\epsilon}} \end{array} \right) \Big|_{\mathbf{y}=\bar{\mathbf{y}}} \\ &= \left( \begin{array}{ccc} \frac{d\mathbf{x}^T}{d\boldsymbol{\epsilon}} & \mathbf{0} & \frac{d\boldsymbol{\epsilon}^T}{d\boldsymbol{\epsilon}} \end{array} \right) \Big|_{\mathbf{y}=\bar{\mathbf{y}}} & \text{(Layer 4, Eq. 16)} \\ &\in \mathbb{R}^{N_a N_e \times N_a (N_p + N_g + N_e)}, \end{aligned}$$

742 measuring total plasticity of the geno-envo-phenotype. The block matrix of *total effects of a mutant's geno-phenotype*  
743 *on her geno-envo-phenotype* is

$$\begin{aligned} \left. \frac{d\mathbf{m}^T}{d\mathbf{z}} \right|_{\mathbf{y}=\bar{\mathbf{y}}} &\equiv \left( \begin{array}{c} \frac{d\mathbf{m}^T}{d\mathbf{x}} \\ \frac{d\mathbf{m}^T}{d\mathbf{y}} \end{array} \right) \Big|_{\mathbf{y}=\bar{\mathbf{y}}} = \left( \begin{array}{ccc} \frac{d\mathbf{x}^T}{d\mathbf{x}} & \mathbf{0} & \frac{d\boldsymbol{\epsilon}^T}{d\mathbf{x}} \\ \frac{d\mathbf{x}^T}{d\mathbf{y}} & \mathbf{I} & \frac{d\boldsymbol{\epsilon}^T}{d\mathbf{y}} \end{array} \right) \Big|_{\mathbf{y}=\bar{\mathbf{y}}} & \text{(Layer 4, Eq. 17)} \\ &\in \mathbb{R}^{N_a (N_p + N_g) \times N_a (N_p + N_g + N_e)}, \end{aligned}$$

744 measuring total developmental bias of the geno-envo-phenotype from the geno-phenotype. The block matrix of *total*  
745 *effects of a mutant's geno-envo-phenotype on her geno-envo-phenotype* is

$$\begin{aligned} \left. \frac{d\mathbf{m}^T}{d\mathbf{m}} \right|_{\mathbf{y}=\bar{\mathbf{y}}} &= \left( \begin{array}{c} \frac{d\mathbf{m}^T}{d\mathbf{x}} \\ \frac{d\mathbf{m}^T}{d\mathbf{y}} \\ \frac{d\mathbf{m}^T}{d\boldsymbol{\epsilon}} \end{array} \right) \Big|_{\mathbf{y}=\bar{\mathbf{y}}} = \left( \begin{array}{ccc} \frac{d\mathbf{x}^T}{d\mathbf{x}} & \mathbf{0} & \frac{d\boldsymbol{\epsilon}^T}{d\mathbf{x}} \\ \frac{d\mathbf{x}^T}{d\mathbf{y}} & \mathbf{I} & \frac{d\boldsymbol{\epsilon}^T}{d\mathbf{y}} \\ \frac{d\mathbf{x}^T}{d\boldsymbol{\epsilon}} & \mathbf{0} & \frac{d\boldsymbol{\epsilon}^T}{d\boldsymbol{\epsilon}} \end{array} \right) \Big|_{\mathbf{y}=\bar{\mathbf{y}}} & \text{(Layer 4, Eq. 18)} \\ &\in \mathbb{R}^{N_a (N_p + N_g + N_e) \times N_a (N_p + N_g + N_e)}, \end{aligned}$$

746 measuring developmental feedback of the geno-envo-phenotype, and which we show is invertible (Appendix F).  
747 Obtaining a compact form for  $d\mathbf{m}^T/d\mathbf{m}|_{\mathbf{y}=\bar{\mathbf{y}}}$  analogous to Layer 4, Eq. 9 seemingly needs  $(d\boldsymbol{\epsilon}^T/d\boldsymbol{\epsilon}|_{\mathbf{y}=\bar{\mathbf{y}}})^{-1}$  which appears  
748 to yield relatively complex expressions so we leave this for future analysis.



We will see that the evolutionary dynamics of the phenotype depends on a matrix measuring “inclusive” total developmental bias of the phenotype. This matrix is the transpose of the matrix of *total social effects of a focal individual’s genotype or phenotype on hers and her partners’ phenotypes*

$$\left. \frac{d(\mathbf{x} + \check{\mathbf{x}})}{d\zeta^\top} \right|_{y=\bar{y}} = \left( \left. \frac{d\mathbf{x}}{d\zeta^\top} + \frac{d\check{\mathbf{x}}}{d\zeta^\top} \right) \right|_{y=\bar{y}}, \quad (\text{Layer 4, Eq. 19})$$

for  $\zeta \in \{\mathbf{x}, \mathbf{y}\}$  where we denote by  $\check{\mathbf{x}}$  the phenotype that a resident develops in the context of mutants (a donor perspective for the mutant). Thus, this matrix can be interpreted as measuring inclusive total developmental bias of the phenotype. Note that the second term on the right-hand side of Layer 4, Eq. 19 is the total effects of social partners’ phenotype or genotype on a focal mutant (a recipient perspective for the mutant). Thus, the inclusive total developmental bias of the phenotype as described by Layer 4, Eq. 19 can be equivalently interpreted either from a donor or a recipient perspective.

Having written expressions for the above total-effect matrices, we can now write the total selection gradients, which measure total directional selection, that is, directional selection considering all the pathways in which a trait can affect fitness in Fig. 1 (see also Morrissey 2014). This contrasts with Lande’s (1979) selection gradient, which corresponds to the direct selection gradient measuring the direct effect of a variable on fitness in Fig. 1. In Appendix B-Appendix F, we show that the total selection gradient of vector  $\zeta \in \{\mathbf{x}, \mathbf{y}, \mathbf{z}, \boldsymbol{\epsilon}, \mathbf{m}\}$  is

$$\left. \frac{dw}{d\zeta} \right|_{y=\bar{y}} = \left( \left. \frac{d\mathbf{m}^\top}{d\zeta} \frac{\partial w}{\partial \mathbf{m}} \right) \right|_{y=\bar{y}}, \quad (\text{Layer 4, Eq. 20})$$

which has the form of the chain rule in matrix calculus notation. Hence, the total selection gradient of  $\zeta$  depends on the total effects of  $\zeta$  on the geno-envo-phenotype and direct directional selection on the geno-envo-phenotype. Consequently, the total directional selection on  $\zeta$  is the directional selection on the geno-envo-phenotype transformed by the total effects of  $\zeta$  on the geno-envo-phenotype considering the downstream developmental effects. Layer 4, Eq. 20 has the same form of previous expressions by Caswell (e.g., Caswell, 1982, Eq. 4 and Caswell, 2001, Eq. 9.38), except that it is in terms of traits rather than vital rates (i.e, Caswell’s equations have the entries of the Leslie matrix in Eq. S7 in the place of  $\mathbf{m}$ ). Layer 4, Eq. 20 also recovers the form of Morrissey’s (2014) extended selection gradient. Total selection gradients take the following particular forms.

The total selection gradient of the phenotype is

$$\begin{aligned} \left. \frac{dw}{d\mathbf{x}} \right|_{y=\bar{y}} &= \left( \left. \frac{d\mathbf{x}^\top}{d\mathbf{x}} \frac{\partial w}{\partial \mathbf{x}} + \frac{d\boldsymbol{\epsilon}^\top}{d\mathbf{x}} \frac{\partial w}{\partial \boldsymbol{\epsilon}} \right) \right|_{y=\bar{y}} \\ &= \left( \left. \frac{d\mathbf{x}^\top}{d\mathbf{x}} \frac{\delta w}{\delta \mathbf{x}} \right) \right|_{y=\bar{y}} \\ &= \left( \left. \frac{d\mathbf{z}^\top}{d\mathbf{x}} \frac{\delta w}{\delta \mathbf{z}} \right) \right|_{y=\bar{y}} \\ &= \left( \left. \frac{d\mathbf{m}^\top}{d\mathbf{x}} \frac{\partial w}{\partial \mathbf{m}} \right) \right|_{y=\bar{y}}. \end{aligned} \quad (\text{Layer 4, Eq. 21})$$

772 This gradient depends on direct directional selection on the phenotype and direct directional selection on the environ-  
 773 ment (Layer 2, Eq. 1). It also depends on developmental feedback of the phenotype (Layer 4, Eq. 1) and total niche  
 774 construction by the phenotype, which also depends on developmental feedback of the phenotype (Layer 4, Eq. 10).  
 775 Consequently, the total selection gradient of the phenotype can be interpreted as measuring total (directional) pheno-  
 776 typic selection in the fitness landscape modified by developmental feedback of the phenotype and by the interaction  
 777 of total niche construction and environmental sensitivity of selection.

778 The total selection gradient of the genotype is

$$\begin{aligned}
 \left. \frac{dw}{dy} \right|_{y=\bar{y}} &= \left( \frac{d\mathbf{x}^T}{dy} \frac{\partial w}{\partial \mathbf{x}} + \frac{\partial w}{\partial y} + \frac{d\boldsymbol{\epsilon}^T}{dy} \frac{\partial w}{\partial \boldsymbol{\epsilon}} \right) \Bigg|_{y=\bar{y}} && \text{(Layer 4, Eq. 22)} \\
 &= \left( \frac{d\mathbf{x}^T}{dy} \frac{\delta w}{\delta \mathbf{x}} + \frac{\delta w}{\delta y} \right) \Bigg|_{y=\bar{y}} \\
 &= \left( \frac{d\mathbf{z}^T}{dy} \frac{\delta w}{\delta \mathbf{z}} \right) \Bigg|_{y=\bar{y}} \\
 &= \left( \frac{d\mathbf{m}^T}{dy} \frac{\partial w}{\partial \mathbf{m}} \right) \Bigg|_{y=\bar{y}} \\
 &= \left( \frac{\delta \mathbf{x}^T}{\delta y} \frac{dw}{d\mathbf{x}} + \frac{\delta w}{\delta y} \right) \Bigg|_{y=\bar{y}} .
 \end{aligned}$$

779 This gradient not only depends on direct directional selection on the phenotype and the environment, but also on direct  
 780 directional selection on the genotype (Layer 2, Eq. 1). It also depends on the mechanistic analogue of Fisher's (1918)  
 781 additive effects of allelic substitution or of Wagner's (1984, 1989) developmental matrix (Layer 4, Eq. 3) and on total  
 782 niche construction by the genotype, which also depends on the developmental matrix (Layer 4, Eq. 11). Consequently,  
 783 the total selection gradient of the genotype can be interpreted as measuring total (directional) genotypic selection  
 784 in a fitness landscape modified by the interaction of total developmental bias of the phenotype from the genotype  
 785 and directional selection on the phenotype and by the interaction of total niche construction by the genotype and  
 786 environmental sensitivity of selection. In a standard quantitative genetics framework, the total selection gradient of  
 787 the genotype would correspond to Lande's (1979) selection gradient of the genotype if phenotypic and environmental  
 788 traits were not explicitly included in the analysis. The fifth line of Layer 4, Eq. 22 has the form of previous expressions  
 789 for the total selection gradient of controls in continuous age in terms of partial derivatives of the Hamiltonian involving  
 790 costate variables for which closed-form formulas have been lacking (e.g., Day and Taylor 1997, Eq. 4, Day and Taylor  
 791 2000, Eq. 6, and Avila et al. 2021, Eq. 23; see also our Eq. K4). Costate variables are proportional to the total selection  
 792 gradient of states (i.e., the phenotype; Eq. (K3); see also Appendix K and Metz et al. 2016). Our discrete-age approach  
 793 allowed us to obtain closed-form formulas for the total selection gradient of states (Layer 4, Eq. 21), thus providing  
 794 closed-form formulas for the total selection gradient of controls.

795 To derive equations describing the evolutionary dynamics of the geno-envo-phenotype, we make use of the total  
 796 selection gradient of the environment, although such gradient is not necessary to obtain equations describing the

evolutionary dynamics of the geno-phenotype. The total selection gradient of the environment is

797

$$\begin{aligned}
 \left. \frac{dw}{d\boldsymbol{\epsilon}} \right|_{y=\bar{y}} &= \left( \frac{d\mathbf{x}^T}{d\boldsymbol{\epsilon}} \frac{\partial w}{\partial \mathbf{x}} + \frac{d\boldsymbol{\epsilon}^T}{d\boldsymbol{\epsilon}} \frac{\partial w}{\partial \boldsymbol{\epsilon}} \right) \Bigg|_{y=\bar{y}} && \text{(Layer 4, Eq. 23)} \\
 &= \left( \frac{d\mathbf{x}^T}{d\boldsymbol{\epsilon}} \frac{\delta w}{\delta \mathbf{x}} + \frac{\delta w}{\delta \boldsymbol{\epsilon}} \right) \Bigg|_{y=\bar{y}} \\
 &= \left( \frac{d\mathbf{m}^T}{d\boldsymbol{\epsilon}} \frac{\partial w}{\partial \mathbf{m}} \right) \Bigg|_{y=\bar{y}} \\
 &= \left( \frac{\delta \mathbf{x}^T}{\delta \boldsymbol{\epsilon}} \frac{dw}{d\mathbf{x}} + \frac{\delta w}{\delta \boldsymbol{\epsilon}} \right) \Bigg|_{y=\bar{y}} .
 \end{aligned}$$

This gradient depends on total plasticity of the phenotype and on environmental feedback, which in turn depends on total plasticity of the phenotype and niche construction by the phenotype (Layer 4, Eq. 13). Consequently, the total selection gradient of the environment can be understood as measuring total (directional) environmental selection in a fitness landscape modified by environmental feedback and by the interaction of total plasticity of the phenotype and direct directional selection on the phenotype.

798

799

800

801

802

We can combine the expressions for the total selection gradients above to obtain the total selection gradient of the geno-phenotype and the geno-envo-phenotype. The total selection gradient of the geno-phenotype is

803

804

$$\begin{aligned}
 \left. \frac{dw}{d\mathbf{z}} \right|_{y=\bar{y}} &= \left( \frac{d\mathbf{z}^T}{d\mathbf{z}} \frac{\partial w}{\partial \mathbf{z}} + \frac{d\boldsymbol{\epsilon}^T}{d\mathbf{z}} \frac{\partial w}{\partial \boldsymbol{\epsilon}} \right) \Bigg|_{y=\bar{y}} && \text{(Layer 4, Eq. 24)} \\
 &= \left( \frac{d\mathbf{z}^T}{d\mathbf{z}} \frac{\delta w}{\delta \mathbf{z}} \right) \Bigg|_{y=\bar{y}} \\
 &= \left( \frac{d\mathbf{m}^T}{d\mathbf{z}} \frac{\partial w}{\partial \mathbf{m}} \right) \Bigg|_{y=\bar{y}} .
 \end{aligned}$$

Thus, the total selection gradient of the geno-phenotype can be interpreted as measuring total (directional) genotypic selection in a fitness landscape modified by developmental feedback of the geno-phenotype and by the interaction of total niche construction by the geno-phenotype and environmental sensitivity of selection. In turn, the total selection gradient of the geno-envo-phenotype is

805

806

807

808

$$\left. \frac{dw}{d\mathbf{m}} \right|_{y=\bar{y}} = \left( \frac{d\mathbf{m}^T}{d\mathbf{m}} \frac{\partial w}{\partial \mathbf{m}} \right) \Bigg|_{y=\bar{y}} , \quad \text{(Layer 4, Eq. 25)}$$

which can be interpreted as measuring total (directional) geno-envo-phenotypic selection in a fitness landscape modified by developmental feedback of the geno-envo-phenotype.

809

810

#### 4.5. Layer 5: stabilized effects

811

We now move on to write the equations for the next layer of the evo-devo process, that of (socio-devo) stabilized-effect matrices. Stabilized-effect matrices measure the total effects of a variable on another one considering downstream developmental effects, after the effects of social development have stabilized in the population. Stabilized-effect matrices arise in the derivation of the evolutionary dynamics of the phenotype and environment as a result of

812

813

814

815

816 social development. If development is not social (i.e.,  $\mathbf{dx}^T/d\bar{\mathbf{z}}|_{\mathbf{y}=\bar{\mathbf{y}}} = \mathbf{0}$ ), then all stabilized-effect matrices ( $\mathbf{s}\zeta^T/\mathbf{s}\xi|_{\mathbf{y}=\bar{\mathbf{y}}}$ )  
 817 reduce to the corresponding total-effect matrices ( $\mathbf{d}\zeta^T/\mathbf{d}\xi|_{\mathbf{y}=\bar{\mathbf{y}}}$ ), except one ( $\mathbf{s}\mathbf{x}^T/\mathbf{s}\bar{\mathbf{x}}|_{\mathbf{y}=\bar{\mathbf{y}}}$ ) that reduces to the identity  
 818 matrix.

819 The stabilized effects of social partners' phenotypes on a focal individual's phenotype measure *social feedback*.  
 820 This is given by the transpose of the matrix of *stabilized effects of social partners' phenotypes on a focal individual's*  
 821 *phenotype*

$$\begin{aligned} \frac{\mathbf{s}\mathbf{x}}{\mathbf{s}\bar{\mathbf{x}}^T}\Big|_{\mathbf{y}=\bar{\mathbf{y}}} &= \left(\mathbf{I} - \frac{\mathbf{d}\check{\mathbf{x}}}{\mathbf{d}\mathbf{x}^T}\Big|_{\mathbf{y}=\bar{\mathbf{y}}}\right)^{-1} = \left(\mathbf{I} - \frac{\mathbf{d}\mathbf{x}}{\mathbf{d}\bar{\mathbf{x}}^T}\Big|_{\mathbf{y}=\bar{\mathbf{y}}}\right)^{-1} \\ &= \sum_{\theta=1}^{\infty} \left(\frac{\mathbf{d}\mathbf{x}}{\mathbf{d}\bar{\mathbf{x}}^T}\right)^{\theta-1}\Big|_{\mathbf{y}=\bar{\mathbf{y}}} \in \mathbb{R}^{N_a N_p \times N_a N_p}, \end{aligned} \quad (\text{Layer 5, Eq. 1})$$

822 where the last equality follows by the geometric series of matrices. The matrix  $\mathbf{s}\mathbf{x}/\mathbf{s}\bar{\mathbf{x}}^T|_{\mathbf{y}=\bar{\mathbf{y}}}$  is invertible by our assump-  
 823 tion that all the eigenvalues of  $\mathbf{d}\mathbf{x}/\mathbf{d}\bar{\mathbf{x}}^T|_{\mathbf{y}=\bar{\mathbf{y}}}$  have absolute value strictly less than one, to guarantee that the resident  
 824 is socio-devo stable. The matrix  $\mathbf{s}\mathbf{x}/\mathbf{s}\bar{\mathbf{x}}^T|_{\mathbf{y}=\bar{\mathbf{y}}}$  can be interpreted as the total effects of social partners' phenotypes on a  
 825 focal individual's phenotype after socio-devo stabilization (Eq. S1); or vice versa, of a focal individual's phenotype on  
 826 social partners' phenotypes. Thus, the matrix  $\mathbf{s}\mathbf{x}/\mathbf{s}\bar{\mathbf{x}}^T|_{\mathbf{y}=\bar{\mathbf{y}}}$  describes social feedback arising from social development.  
 827 This matrix corresponds to an analogous matrix found in the indirect genetic effects literature (Moore et al., 1997,  
 828 Eq. 19b and subsequent text). If development is not social from the phenotype (i.e.,  $\mathbf{d}\mathbf{x}^T/\mathbf{d}\bar{\mathbf{x}}|_{\mathbf{y}=\bar{\mathbf{y}}} = \mathbf{0}$ ), then the matrix  
 829  $\mathbf{s}\mathbf{x}/\mathbf{s}\bar{\mathbf{x}}^T|_{\mathbf{y}=\bar{\mathbf{y}}}$  is the identity matrix. This is the only stabilized-effect matrix that does not reduce to the corresponding  
 830 total-effect matrix when development is not social.

831 The stabilized effects of a focal individual's phenotype or genotype on her phenotype measure stabilized develop-  
 832 mental bias. We define the transpose of the matrix of *stabilized effects of a focal individual's phenotype or genotype*  
 833 *on her phenotype* as

$$\frac{\mathbf{s}\mathbf{x}}{\mathbf{s}\zeta^T}\Big|_{\mathbf{y}=\bar{\mathbf{y}}} = \left(\frac{\mathbf{s}\mathbf{x}}{\mathbf{s}\bar{\mathbf{x}}^T} \frac{\mathbf{d}(\mathbf{x} + \check{\mathbf{x}})}{\mathbf{d}\zeta^T}\right)\Big|_{\mathbf{y}=\bar{\mathbf{y}}}, \quad (\text{Layer 5, Eq. 2a})$$

834 for  $\zeta \in \{\mathbf{x}, \mathbf{y}\}$ . This matrix can be interpreted as measuring stabilized developmental bias of the phenotype from  
 835  $\zeta$ , where a focal individual's genotype or phenotype first affects the development of her own and social partners'  
 836 phenotype which then feeds back to affect the individual's phenotype. Stabilized developmental bias is "inclusive" in  
 837 that it includes both the effects of the focal individual on herself and on social partners. If development is not social  
 838 (i.e.,  $\mathbf{d}\mathbf{x}^T/\mathbf{d}\bar{\mathbf{z}}|_{\mathbf{y}=\bar{\mathbf{y}}} = \mathbf{0}$ ), then a stabilized developmental bias matrix ( $\mathbf{s}\mathbf{x}/\mathbf{s}\zeta^T|_{\mathbf{y}=\bar{\mathbf{y}}}$ ) reduces to the corresponding total  
 839 developmental bias matrix ( $\mathbf{d}\mathbf{x}/\mathbf{d}\zeta^T|_{\mathbf{y}=\bar{\mathbf{y}}}$ ).

840 The stabilized effects of the environment on the phenotype measure stabilized plasticity. The transpose of the  
 841 matrix of *stabilized effects of a focal individual's environment on the phenotype* is

$$\frac{\mathbf{s}\mathbf{x}}{\mathbf{s}\boldsymbol{\epsilon}^T}\Big|_{\mathbf{y}=\bar{\mathbf{y}}} = \left(\frac{\mathbf{s}\mathbf{x}}{\mathbf{s}\bar{\mathbf{x}}^T} \frac{\mathbf{d}\mathbf{x}}{\mathbf{d}\boldsymbol{\epsilon}^T}\right)\Big|_{\mathbf{y}=\bar{\mathbf{y}}} \in \mathbb{R}^{N_a N_p \times N_a N_e}. \quad (\text{Layer 5, Eq. 2b})$$

This matrix can be interpreted as measuring stabilized plasticity of the phenotype, where the environment first causes total plasticity in a focal individual and then the focal individual causes stabilized social effects on social partners. Stabilized plasticity does not depend on the inclusive effects of the environment. If development is not social (i.e.,  $\frac{dx^T}{d\bar{z}}|_{y=\bar{y}} = \mathbf{0}$ ), then stabilized plasticity reduces to total plasticity.

The stabilized effects on the genotype are simple since genotypic traits are developmentally independent by assumption. The transpose of the matrix of *stabilized effects of a focal individual's phenotype or environment on the genotype* is

$$\frac{sy}{s\zeta^T} \Big|_{y=\bar{y}} = \frac{dy}{d\zeta^T} \Big|_{y=\bar{y}} = \mathbf{0}, \quad (\text{Layer 5, Eq. 3a})$$

for  $\zeta \in \{\mathbf{x}, \boldsymbol{\epsilon}\}$ . The transpose of the matrix of *stabilized effects of a focal individual's genotype on the genotype* is

$$\frac{sy}{sy^T} \Big|_{y=\bar{y}} = \frac{dy}{dy^T} \Big|_{y=\bar{y}} = \mathbf{I} \in \mathbb{R}^{N_a N_g \times N_a N_g}. \quad (\text{Layer 5, Eq. 3b})$$

We can use some of the previous stabilized-effect matrices to construct the following stabilized-effect matrices involving the geno-phenotype. The transpose of the matrix of *stabilized effects of a focal individual's genotype on the geno-phenotype* is

$$\frac{sz}{sy^T} \Big|_{y=\bar{y}} \equiv \left( \frac{sx}{sy^T}; \frac{sy}{sy^T} \right) \Big|_{y=\bar{y}} \in \mathbb{R}^{N_a(N_p+N_g) \times N_a N_g}, \quad (\text{Layer 5, Eq. 4a})$$

measuring stabilized developmental bias of the geno-phenotype from the genotype. The transpose of the matrix of *stabilized effects of a focal individual's environment on the geno-phenotype* is

$$\frac{sz}{s\boldsymbol{\epsilon}^T} \Big|_{y=\bar{y}} \equiv \left( \frac{sx}{s\boldsymbol{\epsilon}^T}; \frac{sy}{s\boldsymbol{\epsilon}^T} \right) \Big|_{y=\bar{y}} \in \mathbb{R}^{N_a(N_p+N_g) \times N_a N_e}, \quad (\text{Layer 5, Eq. 4b})$$

measuring stabilized plasticity of the geno-phenotype. The transpose of the matrix of *stabilized effects of a focal individual's geno-phenotype on the geno-phenotype* is

$$\frac{sz}{sz^T} \Big|_{y=\bar{y}} \equiv \left( \begin{array}{cc} \frac{sx}{sx^T} & \frac{sx}{sy^T} \\ \frac{sy}{sx^T} & \frac{sy}{sy^T} \end{array} \right) \Big|_{y=\bar{y}} = \left( \begin{array}{cc} \frac{sx}{sx^T} & \frac{sx}{sy^T} \\ \mathbf{0} & \mathbf{I} \end{array} \right) \Big|_{y=\bar{y}} \in \mathbb{R}^{N_a(N_p+N_g) \times N_a(N_p+N_g)}, \quad (\text{Layer 5, Eq. 5})$$

measuring stabilized developmental feedback of the geno-phenotype.

The stabilized effects of the phenotype or genotype on the environment measure stabilized niche construction. Although the matrix

$$\frac{s\boldsymbol{\epsilon}}{sx^T} \Big|_{y=\bar{y}}$$

appears in some of the matrices we construct, it is irrelevant as it disappears in the matrix products we encounter. The following matrix does not disappear. The transpose of the matrix of *stabilized effects of a focal individual's genotype*

862 on the environment is

$$\frac{\mathbf{s}\boldsymbol{\epsilon}}{\mathbf{s}\mathbf{y}^T} \Big|_{\mathbf{y}=\bar{\mathbf{y}}} = \left( \frac{\partial(\boldsymbol{\epsilon} + \check{\boldsymbol{\epsilon}})}{\partial \mathbf{z}^T} \frac{\mathbf{s}\mathbf{z}}{\mathbf{s}\mathbf{y}^T} \right) \Big|_{\mathbf{y}=\bar{\mathbf{y}}} \in \mathbb{R}^{N_a N_c \times N_a N_g}, \quad (\text{Layer 5, Eq. 6a})$$

863 which is formed by stabilized developmental bias of the geno-phenotype from genotype followed by inclusive direct  
864 niche construction by the geno-phenotype. This matrix can be interpreted as measuring stabilized niche construction  
865 by the genotype. If development is not social (i.e.,  $\mathbf{d}\mathbf{x}^T/\mathbf{d}\bar{\mathbf{z}}|_{\mathbf{y}=\bar{\mathbf{y}}} = \mathbf{0}$ ), then stabilized niche construction by the genotype  
866 reduces to total niche construction by the genotype (see Layer 4, Eq. 11 and Layer 2, Eq. 10).

867 The stabilized effects of the environment on itself measure stabilized environmental feedback. The transpose of  
868 the matrix of *stabilized effects of a focal individual's environment on the environment* is

$$\frac{\mathbf{s}\boldsymbol{\epsilon}}{\mathbf{s}\boldsymbol{\epsilon}^T} \Big|_{\mathbf{y}=\bar{\mathbf{y}}} = \left( \frac{\partial(\boldsymbol{\epsilon} + \check{\boldsymbol{\epsilon}})}{\partial \mathbf{z}^T} \frac{\mathbf{s}\mathbf{z}}{\mathbf{s}\boldsymbol{\epsilon}^T} + \frac{\partial \boldsymbol{\epsilon}}{\partial \boldsymbol{\epsilon}^T} \right) \Big|_{\mathbf{y}=\bar{\mathbf{y}}} \in \mathbb{R}^{N_a N_c \times N_a N_c}, \quad (\text{Layer 5, Eq. 6b})$$

869 which depends on stabilized plasticity of the geno-phenotype, inclusive direct niche construction by the geno-  
870 phenotype, and direct mutual environmental dependence.

871 We can also use some of the following previous stabilized-effect matrices to construct the following stabilized-  
872 effect matrices comprising the geno-envo-phenotype. The transpose of the matrix of *stabilized effects of a focal*  
873 *individual's genotype on the geno-envo-phenotype* is

$$\frac{\mathbf{s}\mathbf{m}}{\mathbf{s}\mathbf{y}^T} \Big|_{\mathbf{y}=\bar{\mathbf{y}}} \equiv \left( \frac{\mathbf{s}\mathbf{x}}{\mathbf{s}\mathbf{y}^T}; \frac{\mathbf{s}\mathbf{y}}{\mathbf{s}\mathbf{y}^T}; \frac{\mathbf{s}\boldsymbol{\epsilon}}{\mathbf{s}\mathbf{y}^T} \right) \Big|_{\mathbf{y}=\bar{\mathbf{y}}} \quad (\text{Layer 5, Eq. 7a})$$

$$\in \mathbb{R}^{N_a(N_p+N_g+N_c) \times N_a N_g},$$

874 measuring stabilized developmental bias of the geno-envo-phenotype from the genotype. The transpose of the matrix  
875 of *stabilized effects of a focal individual's environment on the geno-envo-phenotype* is

$$\frac{\mathbf{s}\mathbf{m}}{\mathbf{s}\boldsymbol{\epsilon}^T} \Big|_{\mathbf{y}=\bar{\mathbf{y}}} \equiv \left( \frac{\mathbf{s}\mathbf{x}}{\mathbf{s}\boldsymbol{\epsilon}^T}; \frac{\mathbf{s}\mathbf{y}}{\mathbf{s}\boldsymbol{\epsilon}^T}; \frac{\mathbf{s}\boldsymbol{\epsilon}}{\mathbf{s}\boldsymbol{\epsilon}^T} \right) \Big|_{\mathbf{y}=\bar{\mathbf{y}}} \quad (\text{Layer 5, Eq. 7b})$$

$$\in \mathbb{R}^{N_a(N_p+N_g+N_c) \times N_a N_c},$$

876 measuring stabilized plasticity of the geno-envo-phenotype. Finally, the transpose of the matrix of *stabilized effects*  
877 *of a focal individual's geno-envo-phenotype on the geno-envo-phenotype* is

$$\frac{\mathbf{s}\mathbf{m}}{\mathbf{s}\mathbf{m}^T} \Big|_{\mathbf{y}=\bar{\mathbf{y}}} \equiv \left( \begin{array}{ccc} \frac{\mathbf{s}\mathbf{x}}{\mathbf{s}\mathbf{x}^T} & \frac{\mathbf{s}\mathbf{x}}{\mathbf{s}\mathbf{y}^T} & \frac{\mathbf{s}\mathbf{x}}{\mathbf{s}\boldsymbol{\epsilon}^T} \\ \frac{\mathbf{s}\mathbf{y}}{\mathbf{s}\mathbf{x}^T} & \frac{\mathbf{s}\mathbf{y}}{\mathbf{s}\mathbf{y}^T} & \frac{\mathbf{s}\mathbf{y}}{\mathbf{s}\boldsymbol{\epsilon}^T} \\ \frac{\mathbf{s}\boldsymbol{\epsilon}}{\mathbf{s}\mathbf{x}^T} & \frac{\mathbf{s}\boldsymbol{\epsilon}}{\mathbf{s}\mathbf{y}^T} & \frac{\mathbf{s}\boldsymbol{\epsilon}}{\mathbf{s}\boldsymbol{\epsilon}^T} \end{array} \right) \Big|_{\mathbf{y}=\bar{\mathbf{y}}}$$

$$= \left( \begin{array}{ccc} \frac{\mathbf{s}\mathbf{x}}{\mathbf{s}\mathbf{x}^T} & \frac{\mathbf{s}\mathbf{x}}{\mathbf{s}\mathbf{y}^T} & \frac{\mathbf{s}\mathbf{x}}{\mathbf{s}\boldsymbol{\epsilon}^T} \\ \mathbf{0} & \mathbf{I} & \mathbf{0} \\ \frac{\mathbf{s}\boldsymbol{\epsilon}}{\mathbf{s}\mathbf{x}^T} & \frac{\mathbf{s}\boldsymbol{\epsilon}}{\mathbf{s}\mathbf{y}^T} & \frac{\mathbf{s}\boldsymbol{\epsilon}}{\mathbf{s}\boldsymbol{\epsilon}^T} \end{array} \right) \Big|_{\mathbf{y}=\bar{\mathbf{y}}} \quad (\text{Layer 5, Eq. 8})$$

$$\in \mathbb{R}^{N_a(N_p+N_g+N_e) \times N_a(N_p+N_g+N_e)},$$

measuring stabilized developmental feedback of the geno-envo-phenotype.

#### 4.6. Layer 6: genetic covariation

We now move to the next layer of the evo-devo process, that of genetic covariation. To present this layer, we first define mechanistic breeding value under our adaptive dynamics assumptions, which allows us to define mechanistic additive genetic covariance matrices under our assumptions. Then, we define (socio-devo) stabilized mechanistic breeding value, which we use to define mechanistic additive socio-genetic cross-covariance matrices. The notions of stabilized mechanistic breeding values and mechanistic socio-genetic cross-covariance generalize the corresponding notions of mechanistic breeding value and mechanistic additive genetic covariance to consider the effects of social development.

We follow the standard definition of breeding value to define its mechanistic analogue under our assumptions. The breeding value of a trait is defined under quantitative genetics assumptions as the best linear estimate of the trait from gene content (Lynch and Walsh, 1998; Walsh and Lynch, 2018). Specifically, under quantitative genetics assumptions, the  $i$ -th trait value  $x_i$  is written as  $x_i = \bar{x}_i + \sum_j \alpha_{ij}(y_j - \bar{y}_j) + e_i$ , where the overbar denotes population average,  $y_j$  is the  $j$ -th predictor (gene content in  $j$ -th locus),  $\alpha_{ij}$  is the partial least-square regression coefficient of  $x_i - \bar{x}_i$  vs  $y_j - \bar{y}_j$ , and  $e_i$  is the residual error; the breeding value of  $x_i$  is  $a_i \equiv \bar{x}_i + \sum_j \alpha_{ij}(y_j - \bar{y}_j)$ . Accordingly, we define the mechanistic breeding value  $\mathbf{b}_\zeta$  of a vector  $\zeta$  as its first-order estimate with respect to genotypic traits  $\mathbf{y}$  around the resident genotypic traits  $\bar{\mathbf{y}}$ :

$$\mathbf{b}_\zeta \equiv \zeta|_{\mathbf{y}=\bar{\mathbf{y}}} + \left. \frac{d\zeta}{d\mathbf{y}^\top} \right|_{\mathbf{y}=\bar{\mathbf{y}}} (\mathbf{y} - \bar{\mathbf{y}}) = \bar{\zeta} + \left. \frac{d\zeta}{d\mathbf{y}^\top} \right|_{\mathbf{y}=\bar{\mathbf{y}}} (\mathbf{y} - \bar{\mathbf{y}}). \quad (\text{Layer 6, Eq. 1})$$

The key difference of this definition with that of breeding value is that rather than using regression coefficients, this definition uses the total effects of the genotype on  $\zeta$ ,  $d\zeta/d\mathbf{y}^\top|_{\mathbf{y}=\bar{\mathbf{y}}}$ , which are a mechanistic analogue to Fisher's additive effect of allelic substitution (his  $\alpha$ ; see Eq. I of Fisher 1918 and p. 72 of Lynch and Walsh 1998). As previously stated, the matrix  $d\zeta/d\mathbf{y}^\top|_{\mathbf{y}=\bar{\mathbf{y}}}$  also corresponds to Wagner's (1984, 1989) developmental matrix, particularly when  $\zeta = \mathbf{x}$  (his  $\mathbf{B}$ ; see Eq. 1 of Wagner 1989).

That there is a material difference between breeding value and its mechanistic counterpart is made evident with heritability. Because breeding value under quantitative genetics uses linear regression via least squares, breeding value  $a_i$  is guaranteed to be uncorrelated with the residual error  $e_i$ . This guarantees that heritability is between zero and one. Indeed, the (narrow sense) heritability of trait  $x_i$  is defined as  $h^2 = \text{var}[a_i]/\text{var}[x_i]$ , where using  $x_i = a_i + e_i$  we have  $\text{var}[x_i] = \text{var}[a_i] + \text{var}[e_i] + 2\text{cov}[a_i, e_i]$ . The latter covariance is zero due to least squares, and so  $h^2 \in [0, 1]$ . In contrast, mechanistic breeding values may be correlated with residual errors. Indeed, in our framework we have that phenotype  $x_{ia} = b_{ia} + O(\|\mathbf{y} - \bar{\mathbf{y}}\|^2)$ , but mechanistic breeding value  $b_{ia}$  is not computed via least squares, so  $b_{ia}$  and the error  $O(\|\mathbf{y} - \bar{\mathbf{y}}\|^2)$  may covary, positively or negatively. Hence, the classic quantitative genetics partition of phenotypic

908 variance into genetic and “environmental” (i.e., residual) variance does not hold with mechanistic breeding value,  
 909 as there may be mechanistic genetic and “environmental” covariance. Consequently, since the covariance between  
 910 two random variables is bounded from below by the negative of the product of their standard deviations, mechanistic  
 911 heritability defined as the ratio between the variance of mechanistic breeding value and phenotypic variance cannot  
 912 be negative but it may be greater than one.

913 Our definition of mechanistic breeding value recovers Fisher’s (1918) infinitesimal model under certain conditions,  
 914 although we do not need to assume the infinitesimal model. According to Fisher’s (1918) infinitesimal model, the  
 915 normalized breeding value excess is normally distributed as the number of loci approaches infinity. Using Layer 6,  
 916 Eq. 1, we have that the mechanistic breeding value excess for the  $i$ -th entry of  $\mathbf{b}_\zeta$  is

$$b_{\zeta_i} - \bar{\zeta}_i = \sum_{k=1}^{N_g} \sum_{a=1}^{N_a} \left. \frac{d\zeta_i}{dy_{ka}} \right|_{\mathbf{y}=\bar{\mathbf{y}}} (y_{ka} - \bar{y}_{ka}).$$

917 Let us denote the mutational variance for the  $k$ -th genotypic trait at age  $a$  by

$$\sigma_{ka}^2 = \text{E}[(y_{ka} - \bar{y}_{ka})^2],$$

918 and let us denote the total mutational variance by

$$s_{N_g N_a}^2 = \sum_{k=1}^{N_g} \sum_{a=1}^{N_a} \sigma_{ka}^2.$$

919 If the  $y_{ka}$  are mutually independent and Lyapunov’s condition is satisfied, from the Lyapunov central limit theorem  
 920 we have that, as either the number of genotypic traits  $N_g$  or the number of ages  $N_a$  tends to infinity (e.g., by reducing  
 921 the age bin size), the normalized mechanistic breeding value excess

$$\frac{1}{s_{N_g N_a}} (b_{\zeta_i} - \bar{\zeta}_i)$$

922 is normally distributed with mean zero and variance 1. Thus, this limit yields Fisher’s (1918) infinitesimal model, al-  
 923 though we do not need to assume such limit. Our framework thus recovers the infinitesimal model as a particular case,  
 924 when either  $N_g$  or  $N_a$  approaches infinity (provided that the  $y_{ka}$  are mutually independent and Lyapunov’s condition  
 925 holds).

926 From our definition of mechanistic breeding value, we have that the mechanistic breeding value of the genotype  
 927 is simply the genotype itself. From Layer 6, Eq. 1, the expected mechanistic breeding value of vector  $\zeta$  is

$$\bar{\mathbf{b}}_\zeta \equiv \text{E}[\mathbf{b}_\zeta] = \bar{\zeta}.$$

928 In turn, the mechanistic breeding value of the genotype  $\mathbf{y}$  is

$$\mathbf{b}_\mathbf{y} = \bar{\mathbf{y}} + \left. \frac{d\mathbf{y}}{d\mathbf{y}^\top} \right|_{\mathbf{y}=\bar{\mathbf{y}}} (\mathbf{y} - \bar{\mathbf{y}}) = \bar{\mathbf{y}} + \mathbf{y} - \bar{\mathbf{y}} = \mathbf{y},$$



since  $\mathbf{dy}/\mathbf{dy}^\top|_{\mathbf{y}=\bar{\mathbf{y}}} = \mathbf{I}$  because, by assumption, the genotype does not have developmental constraints and is developmentally independent (Layer 4, Eq. 6). 929  
930

We now define mechanistic additive genetic covariance matrices under our assumptions. The additive genetic variance of a trait is defined under quantitative genetics assumptions as the variance of its breeding value, which is extended to the multivariate case so the additive genetic covariance matrix of a trait vector is the covariance matrix of the traits' breeding values (Lynch and Walsh, 1998; Walsh and Lynch, 2018). Accordingly, we define the *mechanistic additive genetic covariance matrix* of a vector  $\boldsymbol{\zeta} \in \mathbb{R}^{m \times 1}$  as the covariance matrix of its mechanistic breeding value: 931  
932  
933  
934  
935

$$\begin{aligned}
 \mathbf{H}_\zeta &\equiv \text{cov}[\mathbf{b}_\zeta, \mathbf{b}_\zeta] \\
 &= \mathbb{E}[(\mathbf{b}_\zeta - \bar{\mathbf{b}}_\zeta)(\mathbf{b}_\zeta - \bar{\mathbf{b}}_\zeta)^\top] = \mathbb{E}[(\mathbf{b}_\zeta - \bar{\boldsymbol{\zeta}})(\mathbf{b}_\zeta - \bar{\boldsymbol{\zeta}})^\top] \\
 &= \mathbb{E}\left[\left(\left.\frac{d\boldsymbol{\zeta}}{d\mathbf{y}^\top}\right|_{\mathbf{y}=\bar{\mathbf{y}}}\right)(\mathbf{y} - \bar{\mathbf{y}})\right]\left(\left.\frac{d\boldsymbol{\zeta}}{d\mathbf{y}^\top}\right|_{\mathbf{y}=\bar{\mathbf{y}}}\right)^\top(\mathbf{y} - \bar{\mathbf{y}})^\top\right] \\
 &= \mathbb{E}\left[\left.\frac{d\boldsymbol{\zeta}}{d\mathbf{y}^\top}\right|_{\mathbf{y}=\bar{\mathbf{y}}}\right](\mathbf{y} - \bar{\mathbf{y}})(\mathbf{y} - \bar{\mathbf{y}})^\top\left.\frac{d\boldsymbol{\zeta}^\top}{d\mathbf{y}}\right|_{\mathbf{y}=\bar{\mathbf{y}}}\right] \\
 &= \left.\frac{d\boldsymbol{\zeta}}{d\mathbf{y}^\top}\right|_{\mathbf{y}=\bar{\mathbf{y}}}\mathbb{E}[(\mathbf{y} - \bar{\mathbf{y}})(\mathbf{y} - \bar{\mathbf{y}})^\top]\left.\frac{d\boldsymbol{\zeta}^\top}{d\mathbf{y}}\right|_{\mathbf{y}=\bar{\mathbf{y}}}\right] \\
 &= \left(\left.\frac{d\boldsymbol{\zeta}}{d\mathbf{y}^\top}\mathbf{H}_\mathbf{y}\frac{d\boldsymbol{\zeta}^\top}{d\mathbf{y}}\right)\right|_{\mathbf{y}=\bar{\mathbf{y}}}\in \mathbb{R}^{m \times m}, \tag{Layer 6, Eq. 2}
 \end{aligned}$$

where the fourth line follows from the property of the transpose of a product (i.e.,  $(\mathbf{AB})^\top = \mathbf{B}^\top\mathbf{A}^\top$ ) and the last line follows since the mechanistic additive genetic covariance matrix of the genotype  $\mathbf{y}$  is 936  
937

$$\mathbf{H}_\mathbf{y} \equiv \text{cov}[\mathbf{b}_\mathbf{y}, \mathbf{b}_\mathbf{y}] = \text{cov}[\mathbf{y}, \mathbf{y}] \in \mathbb{R}^{N_a N_g \times N_a N_g}.$$

Layer 6, Eq. 2 has the same form of previous expressions for the additive genetic covariance matrix under quantitative genetics assumptions, although using least-square regression coefficients in place of the derivatives if the classic partitioning of phenotypic variance is to hold (see Eq. II of Fisher 1918, Eq. + of Wagner 1984, Eq. 3.5b of Barton and Turelli 1987, and Eq. 4.23b of Lynch and Walsh 1998; see also Eq. 22a of Lande 1980, Eq. 3 of Wagner 1989, and Eq. 9 of Charlesworth 1990). We denote the matrix  $\mathbf{H}$  (for heredity) rather than  $\mathbf{G}$  to note that the two are different, particularly as the former is based on mechanistic breeding value. Note  $\mathbf{H}_\zeta$  is symmetric. 938  
939  
940  
941  
942  
943

In some cases, Layer 6, Eq. 2 allows one to immediately determine whether a mechanistic additive genetic covariance matrix is singular. Indeed, a matrix with fewer rows than columns is always singular (Horn and Johnson, 2013, section 0.5 second line), and if the product  $\mathbf{AB}$  is well-defined and  $\mathbf{B}$  is singular, then  $\mathbf{AB}$  is singular (this is easily checked to hold). Hence, from Layer 6, Eq. 2 it follows that  $\mathbf{H}_\zeta$  is necessarily singular if  $d\boldsymbol{\zeta}^\top/d\mathbf{y}$  has fewer rows than columns, that is, if  $\mathbf{y}$  has fewer entries than  $\boldsymbol{\zeta}$ . Since  $\mathbf{y}$  has  $N_a N_g$  entries and  $\boldsymbol{\zeta}$  has  $m$  entries, then  $\mathbf{H}_\zeta$  is singular if  $N_a N_g < m$ . Moreover, Layer 6, Eq. 2 allows one to immediately identify bounds for the “degrees of freedom” of genetic covariation, that is, for the rank of  $\mathbf{H}_\zeta$ . Indeed, for a matrix  $\mathbf{A} \in \mathbb{R}^{m \times n}$ , we have that the rank of  $\mathbf{A}$  is at most the smallest value of  $m$  and  $n$ , that is,  $\text{rank}(\mathbf{A}) \leq \min\{m, n\}$  (Horn and Johnson, 2013, section 0.4.5 (a)). Moreover, 944  
945  
946  
947  
948  
949  
950  
951

952 from the Frobenius inequality (Horn and Johnson, 2013, section 0.4.5 (e)), for a well-defined product  $\mathbf{AB}$ , we have  
 953 that  $\text{rank}(\mathbf{AB}) \leq \text{rank}(\mathbf{B})$ . Therefore, for  $\zeta \in \mathbb{R}^{m \times 1}$ , we have that

$$\text{rank}(\mathbf{H}_\zeta) \leq \min\{N_a N_g, m\}. \quad (\text{Layer 6, Eq. 3})$$

954 Intuitively, this states that the degrees of freedom of genetic covariation are at most given by the lifetime number of  
 955 genotypic traits (i.e.,  $N_a N_g$ ). So if there are more traits in  $\zeta$  than there are lifetime genotypic traits, then there are  
 956 fewer degrees of freedom of genetic covariation than traits. This point is mathematically trivial and has undoubtedly  
 957 been clear in the evolutionary literature for decades. However, this point will be biologically crucial because the  
 958 evolutionary dynamic equations in gradient form that are generally dynamically sufficient involve a  $\mathbf{H}_\zeta$  whose  $\zeta$   
 959 necessarily has fewer entries than  $\mathbf{y}$ . Note also that these points on the singularity and rank of  $\mathbf{H}_\zeta$  also hold under  
 960 quantitative genetics assumptions, where the same structure (Layer 6, Eq. 2) holds, except that  $\mathbf{H}_y$  does not refer  
 961 to mutational variation but to standing variation in allele frequency and total effects are measured with regression  
 962 coefficients. Considering standing variation in  $\mathbf{H}_y$  and regression coefficients does not affect the points made in this  
 963 paragraph.

964 Consider the following slight generalization of the mechanistic additive genetic covariance matrix. We define  
 965 the mechanistic additive genetic cross-covariance matrix between a vector  $\zeta \in \mathbb{R}^{m \times 1}$  and a vector  $\xi \in \mathbb{R}^{n \times 1}$  as the  
 966 cross-covariance matrix of their mechanistic breeding value:

$$\mathbf{H}_{\zeta\xi} \equiv \text{cov}[\mathbf{b}_\zeta, \mathbf{b}_\xi] = \left( \frac{d\zeta}{dy^T} \mathbf{H}_y \frac{d\xi^T}{dy} \right) \Big|_{y=\bar{y}} \in \mathbb{R}^{m \times n}. \quad (\text{Layer 6, Eq. 4})$$

967 Thus,  $\mathbf{H}_{\zeta\zeta} = \mathbf{H}_\zeta$ . Note  $\mathbf{H}_{\zeta\xi}$  may be rectangular, and if square, asymmetric. Again, from Layer 6, Eq. 4 it follows that  
 968  $\mathbf{H}_{\zeta\xi}$  is necessarily singular if there are fewer entries in  $\mathbf{y}$  than in  $\xi$  (i.e., if  $N_a N_g < n$ ). Also, for  $\xi \in \mathbb{R}^{n \times 1}$ , have that

$$\text{rank}(\mathbf{H}_{\zeta\xi}) \leq \min\{N_a N_g, n\}.$$

969 In words, the degrees of freedom of genetic cross-covariation are at most given by the lifetime number of genotypic  
 970 traits.

971 The mechanistic additive genetic covariance matrix of the phenotype takes the following form. Evaluating Layer  
 972 6, Eq. 2 at  $\zeta = \mathbf{x}$ , the mechanistic additive genetic covariance matrix of the phenotype  $\mathbf{x} \in \mathbb{R}^{N_a N_p \times 1}$  is

$$\mathbf{H}_x = \left( \frac{d\mathbf{x}}{dy^T} \mathbf{H}_y \frac{d\mathbf{x}^T}{dy} \right) \Big|_{y=\bar{y}} \in \mathbb{R}^{N_a N_p \times N_a N_p}, \quad (\text{Layer 6, Eq. 5})$$

973 which is singular because the developmental matrix  $d\mathbf{x}^T/dy|_{y=\bar{y}}$  is singular since the developmentally initial phenotype  
 974 is not affected by the genotype and the developmentally final genotypic traits do not affect the phenotype (Appendix  
 975 C, Eq. C16). However, a dynamical system consisting only of evolutionary dynamic equations for the phenotype thus  
 976 having an associated  $\mathbf{H}_x$ -matrix is underdetermined in general because the system has fewer dynamic equations (i.e.,  
 977 the number of entries in  $\mathbf{x}$ ) than dynamic variables (i.e., the number of entries in  $(\mathbf{x}; \mathbf{y}; \boldsymbol{\epsilon})$ ). Indeed, the evolution-  
 978 ary dynamics of the phenotype generally depends on the resident genotype, in particular, because the developmental

matrix depends on the resident genotype (Layer 4, Eq. 3; e.g., due to non-linearities in the developmental map involving products between genotypic traits, or between genotypic traits and phenotypes, or between genotypic traits and environmental traits, that is, gene-gene interaction, gene-phenotype interaction, and gene-environment interaction, respectively). Thus, evolutionary dynamic equations of the phenotype alone generally have either zero or an infinite number of solutions for any given initial condition and are thus dynamically insufficient. To have a determined system in gradient form that is dynamically sufficient in general, we follow the evolutionary dynamics of both the phenotype and the genotype, that is, of the geno-phenotype, which depends on  $\mathbf{H}_z$  rather than  $\mathbf{H}_x$  alone.

The mechanistic additive genetic covariance matrix of the geno-phenotype takes the following form. Evaluating Layer 6, Eq. 2 at  $\zeta = \mathbf{z}$ , the mechanistic additive genetic covariance matrix of the geno-phenotype  $\mathbf{z} \in \mathbb{R}^{N_a(N_p+N_g) \times 1}$  is

$$\mathbf{H}_z = \left( \frac{d\mathbf{z}}{d\mathbf{y}^\top} \mathbf{H}_y \frac{d\mathbf{z}^\top}{d\mathbf{y}} \right) \Big|_{\mathbf{y}=\bar{\mathbf{y}}} \in \mathbb{R}^{N_a(N_p+N_g) \times N_a(N_p+N_g)}. \quad (\text{Layer 6, Eq. 6})$$

This matrix is necessarily singular because the geno-phenotype  $\mathbf{z}$  includes the genotype  $\mathbf{y}$  so  $d\mathbf{z}^\top/d\mathbf{y}$  has fewer rows than columns (Layer 4, Eq. 8). Intuitively, Layer 6, Eq. 6 has this form because the phenotype is related to the genotype by the developmental constraint (1). From Layer 6, Eq. 3, the rank of  $\mathbf{H}_z$  has an upper bound given by the number of genotypic traits across life (i.e.,  $N_a N_g$ ), so  $\mathbf{H}_z$  has at least  $N_a N_p$  eigenvalues that are exactly zero. Thus,  $\mathbf{H}_z$  is singular if there is at least one trait that is developmentally constructed according to the developmental constraint (1) (i.e., if  $N_p > 0$ ). This is a mathematically trivial singularity, but it is biologically key because it is  $\mathbf{H}_z$  rather than  $\mathbf{H}_x$  that occurs in a generally dynamically sufficient evolutionary system in gradient form (provided the environment is constant; if the environment is not constant, the relevant matrix is  $\mathbf{H}_m$  which is also always singular if there is at least one phenotype or one environmental trait).

Another way to see the singularity of  $\mathbf{H}_z$  is the following. From Layer 6, Eq. 6, we can write the mechanistic additive genetic covariance matrix of the geno-phenotype as

$$\mathbf{H}_z = \begin{pmatrix} \mathbf{H}_{zx} & \mathbf{H}_{zy} \end{pmatrix},$$

where the mechanistic additive genetic cross-covariance matrix between  $\mathbf{z}$  and  $\mathbf{x}$  is

$$\mathbf{H}_{zx} = \left( \frac{d\mathbf{z}}{d\mathbf{y}^\top} \mathbf{H}_y \frac{d\mathbf{x}^\top}{d\mathbf{y}} \right) \Big|_{\mathbf{y}=\bar{\mathbf{y}}} \in \mathbb{R}^{N_a(N_p+N_g) \times N_a N_p},$$

and the mechanistic additive genetic cross-covariance matrix between  $\mathbf{z}$  and  $\mathbf{y}$  is

$$\mathbf{H}_{zy} = \left( \frac{d\mathbf{z}}{d\mathbf{y}^\top} \mathbf{H}_y \frac{d\mathbf{y}^\top}{d\mathbf{y}} \right) \Big|_{\mathbf{y}=\bar{\mathbf{y}}} \in \mathbb{R}^{N_a(N_p+N_g) \times N_a N_g}.$$

Thus, using Layer 4, Eq. 6, we have that

$$\mathbf{H}_{zx} = \mathbf{H}_{zy} \frac{d\mathbf{x}^\top}{d\mathbf{y}} \Big|_{\mathbf{y}=\bar{\mathbf{y}}}. \quad (\text{Layer 6, Eq. 7})$$

That is, some columns of  $\mathbf{H}_z$  (i.e., those in  $\mathbf{H}_{zx}$ ) are linear combinations of other columns of  $\mathbf{H}_z$  (i.e., those in  $\mathbf{H}_{zy}$ ). Hence,  $\mathbf{H}_z$  is singular.

1004 The mechanistic additive genetic covariance matrix of the geno-phenotype is singular because the geno-phenotype  
 1005 includes the genotype (“gene content”). The singularity arises because the mechanistic breeding value of the pheno-  
 1006 type is a linear combination of the mechanistic breeding value of the genotype by definition of mechanistic breeding  
 1007 value, regardless of whether the phenotype is a linear function of the genotype and regardless of the number of phe-  
 1008 notypic or genotypic traits. In quantitative genetics terms, the  $\mathbf{G}$ -matrix is a function of allele frequencies (which  
 1009 corresponds to our  $\bar{\mathbf{y}}$ ), so a generally dynamically sufficient Lande system would require that allele frequencies are  
 1010 part of the dynamic variables considered; consequently, if the geno-phenotypic vector  $\bar{\mathbf{z}}$  includes allele frequencies  $\bar{\mathbf{y}}$ ,  
 1011 then  $\mathbf{G}$  is necessarily singular since by definition, breeding value under quantitative genetics assumptions is a linear  
 1012 combination of gene content. The singularity of  $\mathbf{H}_{\mathbf{z}}$  implies that if there is only one phenotype and one genotypic  
 1013 trait, with a single age each, then there is a perfect correlation between their mechanistic breeding values (i.e., their  
 1014 correlation coefficient is 1). This also holds under quantitative genetics assumptions, in which case the breeding  
 1015 value  $a$  of a trait  $x$  is a linear combination of a single predictor  $y$ , so the breeding value  $a$  and predictor  $y$  are per-  
 1016 fectly correlated (i.e.,  $\text{cov}[a, y] / \sqrt{\text{var}[a]\text{var}[y]} = \text{cov}[\alpha y, y] / \sqrt{\text{var}[\alpha y]\text{var}[y]} = (\alpha/\alpha)\text{cov}[y, y] / \sqrt{\text{var}[y]\text{var}[y]} = 1$ ).  
 1017 The perfect correlation between a single breeding value and a single predictor arises because, by definition, breeding  
 1018 value excludes residual error  $e$ . Note this does not mean that the phenotype and genotype are linearly related: it is  
 1019 (mechanistic) breeding values and the genotype that are linearly related by definition of (mechanistic) breeding value  
 1020 (Layer 6, Eq. 1). A standard approach to remove the singularity of an additive genetic covariance matrix is to remove  
 1021 some traits from the analysis (Lande, 1979). To remove the singularity of  $\mathbf{H}_{\mathbf{z}}$  we would need to remove at least either  
 1022 all phenotypic traits or all genotypic traits from the analysis. However, removing all phenotypic traits from the anal-  
 1023 ysis prevents analysing phenotypic evolution as the climbing of a fitness landscape whereas removing all genotypic  
 1024 traits from the analysis renders the analysis dynamically insufficient in general because the evolutionary dynamics  
 1025 of some variables is not described. Thus, in general, to analyse a dynamically sufficient description of phenotypic  
 1026 evolution as the climbing of a fitness landscape, we must keep the singularity of  $\mathbf{H}_{\mathbf{z}}$ .

1027 We now use stabilized-effect matrices (Layer 5) to consider social development by extending the notion of mech-  
 1028 anistic breeding value (Layer 6, Eq. 1). We define the stabilized mechanistic breeding value of a vector  $\zeta$  as:

$$\mathbf{b}_{\zeta}^s \equiv \zeta|_{\mathbf{y}=\bar{\mathbf{y}}} + \frac{s\zeta}{s\mathbf{y}^T} \Big|_{\mathbf{y}=\bar{\mathbf{y}}} (\mathbf{y} - \bar{\mathbf{y}}) = \bar{\zeta} + \frac{s\zeta}{s\mathbf{y}^T} \Big|_{\mathbf{y}=\bar{\mathbf{y}}} (\mathbf{y} - \bar{\mathbf{y}}). \quad (\text{Layer 6, Eq. 8})$$

1029 Recall that the stabilized-effect matrix  $s\zeta/s\mathbf{y}^T|_{\mathbf{y}=\bar{\mathbf{y}}}$  equals the total-effect matrix  $d\zeta/d\mathbf{y}^T|_{\mathbf{y}=\bar{\mathbf{y}}}$  if development is non-  
 1030 social. Thus, if development is non-social, the stabilized mechanistic breeding value  $\mathbf{b}_{\zeta}^s$  equals the mechanistic breed-  
 1031 ing value  $\mathbf{b}_{\zeta}$ . Also, note that  $E[\mathbf{b}_{\zeta}^s] = \bar{\zeta}$ .

1032 With this, we extend the notion of mechanistic additive genetic covariance matrix to include the effects of socio-  
 1033 devo stabilization as follows. We define the *mechanistic additive socio-genetic cross-covariance matrix* of  $\zeta \in \mathbb{R}^{m \times 1}$   
 1034 as (L for legacy)

$$\mathbf{L}_{\zeta} \equiv \text{cov}[\mathbf{b}_{\zeta}^s, \mathbf{b}_{\zeta}] = \left( \frac{s\zeta}{s\mathbf{y}^T} \mathbf{H}_{\mathbf{y}} \frac{d\zeta^T}{d\mathbf{y}} \right) \Big|_{\mathbf{y}=\bar{\mathbf{y}}} \in \mathbb{R}^{m \times m}. \quad (\text{Layer 6, Eq. 9})$$

Note  $\mathbf{L}_\zeta$  may be asymmetric and its main diagonal entries may be negative (unlike variances). If development is non-social,  $\mathbf{L}_\zeta$  equals  $\mathbf{H}_\zeta$ . As before,  $\mathbf{L}_\zeta$  is singular if  $\zeta$  has fewer entries than  $\mathbf{y}$ . Also, for  $\zeta \in \mathbb{R}^{m \times 1}$ , have that

$$\text{rank}(\mathbf{L}_\zeta) \leq \min\{N_a N_g, m\}.$$

That is, the degrees of freedom of socio-genetic covariation are at most also given by the lifetime number of genotypic traits.

Similarly, we generalize this notion and define the *mechanistic additive socio-genetic cross-covariance matrix* between  $\zeta \in \mathbb{R}^{m \times 1}$  and  $\xi \in \mathbb{R}^{n \times 1}$  as

$$\mathbf{L}_{\zeta\xi} \equiv \text{cov}[\mathbf{b}_\zeta^s, \mathbf{b}_\xi] = \left( \frac{s_\zeta}{s_{\mathbf{y}^\top}} \mathbf{H}_y \frac{d\xi^\top}{d\mathbf{y}} \right) \Big|_{\mathbf{y}=\bar{\mathbf{y}}} \in \mathbb{R}^{m \times n}. \quad (\text{Layer 6, Eq. 10})$$

Again, if development is non-social,  $\mathbf{L}_{\zeta\xi}$  equals  $\mathbf{H}_{\zeta\xi}$ . Note  $\mathbf{L}_{\zeta\xi}$  may be rectangular and, if square, asymmetric. Also,  $\mathbf{L}_{\zeta\xi}$  is singular if  $\xi$  has fewer entries than  $\mathbf{y}$ . For  $\xi \in \mathbb{R}^{n \times 1}$ , have that

$$\text{rank}(\mathbf{L}_{\zeta\xi}) \leq \min\{N_a N_g, n\}.$$

That is, the degrees of freedom of socio-genetic cross-covariation are at most still given by the lifetime number of genotypic traits.

In particular, some  $\mathbf{L}_{\zeta\xi}$  matrices are singular or not as follows. The mechanistic additive socio-genetic cross-covariance matrix between  $\zeta$  and the geno-phenotype  $\mathbf{z}$

$$\mathbf{L}_{\zeta\mathbf{z}} = \left( \frac{s_\zeta}{s_{\mathbf{y}^\top}} \mathbf{H}_y \frac{d\mathbf{z}^\top}{d\mathbf{y}} \right) \Big|_{\mathbf{y}=\bar{\mathbf{y}}} \in \mathbb{R}^{m \times N_a(N_p + N_g)} \quad (\text{Layer 6, Eq. 11})$$

is singular if there is at least one phenotype (i.e., if  $N_p > 0$ ). Thus,  $\mathbf{L}_{\zeta\mathbf{z}}$  has at least  $N_a N_p$  eigenvalues that are exactly zero. Also, the mechanistic additive socio-genetic cross-covariance matrix between  $\zeta$  and the geno-envo-phenotype  $\mathbf{m}$

$$\mathbf{L}_{\zeta\mathbf{m}} = \left( \frac{s_\zeta}{s_{\mathbf{y}^\top}} \mathbf{H}_y \frac{d\mathbf{m}^\top}{d\mathbf{y}} \right) \Big|_{\mathbf{y}=\bar{\mathbf{y}}} \in \mathbb{R}^{m \times (1 + N_a)(N_p + N_g + N_e)} \quad (\text{Layer 6, Eq. 12})$$

is singular if there is at least one phenotype or one environmental trait (i.e., if  $N_p > 0$  or  $N_e > 0$ ). Thus,  $\mathbf{L}_{\zeta\mathbf{m}}$  has at least  $N_a(N_p + N_e)$  eigenvalues that are exactly zero. In important contrast, the mechanistic additive socio-genetic cross-covariance matrix between a vector  $\zeta \in \{\mathbf{y}, \mathbf{z}, \mathbf{m}\}$  and the genotype  $\mathbf{y}$

$$\mathbf{L}_{\zeta\mathbf{y}} = \left( \frac{s_\zeta}{s_{\mathbf{y}^\top}} \mathbf{H}_y \right) \Big|_{\mathbf{y}=\bar{\mathbf{y}}} \in \mathbb{R}^{m \times N_a N_g} \quad (\text{Layer 6, Eq. 13})$$

is non-singular if  $\mathbf{H}_y$  is non-singular because the genotype is developmentally independent (Appendix H and Appendix J). The  $\mathbf{L}$ -matrices share various properties with similar generalizations of the  $\mathbf{G}$ -matrix arising in the indirect genetic effects literature (Kirkpatrick and Lande, 1989; Moore et al., 1997; Townley and Ezard, 2013).

1056 *4.7. Layer 7: evolutionary dynamics*

1057 Finally, we move to the top layer of the evo-devo process, that of the evolutionary dynamics. This layer con-  
 1058 tains equations describing the evolutionary dynamics under explicit developmental and environmental constraints. In  
 1059 Supplementary Information section S3 and Appendix G-Appendix J, we show that, in the limit as  $\Delta\tau \rightarrow 0$ , the  
 1060 evolutionary dynamics of the phenotype, genotype, geno-phenotype, environment, and geno-envo-phenotype (i.e., for  
 1061  $\zeta \in \{\mathbf{x}, \mathbf{y}, \mathbf{z}, \boldsymbol{\epsilon}, \mathbf{m}\}$ ) are given by

$$\frac{d\bar{\zeta}}{d\tau} \approx \left( \iota \mathbf{L}_{\zeta\mathbf{m}} \frac{\partial w}{\partial \mathbf{m}} + \frac{s\zeta}{s\boldsymbol{\epsilon}^\top} \frac{\partial \boldsymbol{\epsilon}}{\partial \tau} \right) \Big|_{\mathbf{y}=\bar{\mathbf{y}}}, \quad (\text{Layer 7, Eq. 1a})$$

1062 which must satisfy both the developmental constraint

$$\bar{\mathbf{x}}_{a+1} = \mathbf{g}_a(\bar{\mathbf{m}}_a, \bar{\mathbf{z}}) \text{ for all } a \in \{1, \dots, N_a - 1\} \text{ with fixed } \bar{\mathbf{x}}_1, \quad (\text{Layer 7, Eq. 1b})$$

1063 and the environmental constraint

$$\bar{\boldsymbol{\epsilon}}_a = \mathbf{h}_a(\bar{\mathbf{z}}_a, \bar{\mathbf{z}}, \tau) \text{ for all } a \in \{1, \dots, N_a\}. \quad (\text{Layer 7, Eq. 1c})$$

1064 If  $\zeta = \mathbf{z}$  in Layer 7, Eq. 1a, then the equations in Layers 2-6 guarantee that the developmental constraint is satisfied  
 1065 for all  $\tau > \tau_1$  given that it is satisfied at the initial evolutionary time  $\tau_1$ . If  $\zeta = \mathbf{m}$  in Layer 7, Eq. 1a, then the equations  
 1066 in Layers 2-6 guarantee that both the developmental and environmental constraints are satisfied for all  $\tau > \tau_1$  given  
 1067 that they are satisfied at the initial evolutionary time  $\tau_1$ . Both the developmental and environmental constraints can  
 1068 evolve as the genotype, phenotype, and environment evolve and such constraints can involve any family of curves as  
 1069 long as they are differentiable.

1070 Layer 7, Eq. 1a describes the evolutionary dynamics as consisting of selection response and exogenous plastic  
 1071 response. Layer 7, Eq. 1a contains the term

$$\iota \mathbf{L}_{\zeta\mathbf{m}} \frac{\partial w}{\partial \mathbf{m}} \Big|_{\mathbf{y}=\bar{\mathbf{y}}}, \quad (\text{Layer 7, Eq. 2})$$

1072 which comprises direct directional selection on the geno-envo-phenotype ( $\partial w / \partial \mathbf{m} \Big|_{\mathbf{y}=\bar{\mathbf{y}}}$ ) and socio-genetic cross-  
 1073 covariation between  $\zeta$  and the geno-envo-phenotype ( $\mathbf{L}_{\zeta\mathbf{m}}$ ). The term in Layer 7, Eq. 2 is the *selection response*  
 1074 of  $\zeta$  and is a mechanistic generalization of Lande's (1979) generalization of the univariate breeder's equation (Lush,  
 1075 1937; Walsh and Lynch, 2018). Additionally, Layer 7, Eq. 1a contains the term

$$\left( \frac{s\zeta}{s\boldsymbol{\epsilon}^\top} \frac{\partial \boldsymbol{\epsilon}}{\partial \tau} \right) \Big|_{\mathbf{y}=\bar{\mathbf{y}}}, \quad (\text{Layer 7, Eq. 3})$$

1076 which comprises the vector of environmental change due to exogenous causes ( $\partial \bar{\boldsymbol{\epsilon}} / \partial \tau$ ) and the matrix of stabilized  
 1077 plasticity ( $s\zeta / s\boldsymbol{\epsilon}^\top \Big|_{\mathbf{y}=\bar{\mathbf{y}}}$ ). The term in Layer 7, Eq. 3 is the *exogenous plastic response* of  $\zeta$  and is a mechanistic gener-  
 1078 alization of previous expressions (cf. Eq. A3 of Chevin et al. 2010). Note that the *endogenous* plastic response of  $\zeta$   
 1079 (i.e., the plastic response due to endogenous environmental change arising from niche construction) is part of both the  
 1080 selection response and the exogenous plastic response (Layers 2-6).

Selection response is relatively incompletely described by direct directional selection on the geno-envo-phenotype. We saw that the matrix  $\mathbf{L}_{\zeta\mathbf{m}}$  is always singular if there is at least one phenotype or one environmental trait (Layer 6, Eq. 12). Consequently, evolutionary equilibria of  $\zeta$  can invariably occur with persistent direct directional selection on the geno-envo-phenotype, regardless of whether there is exogenous plastic response.

Selection response is also relatively incompletely described by total immediate selection on the geno-phenotype. We can rewrite the selection response, so the evolutionary dynamics of  $\zeta \in \{\mathbf{x}, \mathbf{y}, \mathbf{z}, \boldsymbol{\epsilon}, \mathbf{m}\}$  (Layer 7, Eq. 1a) is equivalently given by

$$\frac{d\bar{\zeta}}{d\tau} \approx \left( \iota \mathbf{L}_{\zeta\mathbf{z}} \frac{\delta w}{\delta \mathbf{z}} + \frac{s\zeta}{s\boldsymbol{\epsilon}^T} \frac{\partial \boldsymbol{\epsilon}}{\partial \tau} \right) \Bigg|_{\mathbf{y}=\bar{\mathbf{y}}}. \quad (\text{Layer 7, Eq. 4})$$

This equation now depends on total immediate selection on the geno-phenotype ( $\delta w/\delta \mathbf{z}|_{\mathbf{y}=\bar{\mathbf{y}}}$ ), which measures total immediate directional selection on the geno-phenotype (or in a quantitative genetics framework, it is Lande's (1979) selection gradient of the allele frequency and phenotype if environmental traits are not explicitly included in the analysis). We saw that the total immediate selection gradient of the geno-phenotype can be interpreted as pointing in the direction of steepest ascent on the fitness landscape in geno-phenotype space after the landscape is modified by the interaction of direct niche construction and environmental sensitivity of selection (Layer 3, Eq. 1). We also saw that the matrix  $\mathbf{L}_{\zeta\mathbf{z}}$  is always singular if there is at least one phenotype (Layer 6, Eq. 11). Consequently, evolutionary equilibria can invariably occur with persistent directional selection on the geno-phenotype after niche construction has modified the geno-phenotype's fitness landscape, regardless of whether there is exogenous plastic response.

In contrast, selection response is relatively completely described by total genotypic selection. We can further rewrite selection response, so the evolutionary dynamics of  $\zeta \in \{\mathbf{x}, \mathbf{y}, \mathbf{z}, \boldsymbol{\epsilon}, \mathbf{m}\}$  (Layer 7, Eq. 1a) is equivalently given by

$$\frac{d\bar{\zeta}}{d\tau} \approx \left( \iota \mathbf{L}_{\zeta\mathbf{y}} \frac{dw}{d\mathbf{y}} + \frac{s\zeta}{s\boldsymbol{\epsilon}^T} \frac{\partial \boldsymbol{\epsilon}}{\partial \tau} \right) \Bigg|_{\mathbf{y}=\bar{\mathbf{y}}}. \quad (\text{Layer 7, Eq. 5})$$

This equation now depends on total genotypic selection ( $dw/d\mathbf{y}|_{\mathbf{y}=\bar{\mathbf{y}}}$ ), which measures total directional selection on the genotype considering downstream developmental effects (or in a quantitative genetics framework, it is Lande's (1979) selection gradient of allele frequency if neither the phenotype nor environmental traits are explicitly included in the analysis). We saw that the total selection gradient of the genotype can be interpreted as pointing in the direction of steepest ascent on the fitness landscape in genotype space after the landscape is modified by the interaction of total developmental bias from the genotype and directional selection on the phenotype and by the interaction of total niche construction by the genotype and environmental sensitivity of selection (Layer 4, Eq. 22). In contrast to the other arrangements of selection response, in Appendix H and Appendix J we show that  $\mathbf{L}_{\zeta\mathbf{y}}$  is non-singular for all  $\zeta \in \{\mathbf{y}, \mathbf{z}, \mathbf{m}\}$  if  $\mathbf{H}_{\mathbf{y}}$  is non-singular (i.e., if there is mutational variation in all directions of genotype space); this non-singularity of  $\mathbf{L}_{\zeta\mathbf{y}}$  arises because genotypic traits are developmentally independent by assumption. Consequently, evolutionary equilibria of the genotype, geno-phenotype, or geno-envo-phenotype can only occur when total genotypic

1111 selection vanishes if there is mutational variation in all directions of genotype space and if exogenous plastic response  
1112 is absent.

1113 Importantly, although Layer 7, Eq. 1a and its equivalents describe the evolutionary dynamics of  $\zeta$ , such equations  
1114 are guaranteed to be dynamically sufficient only for certain  $\zeta$ . Layer 7, Eq. 1a and its equivalents are dynamically  
1115 sufficient if  $\zeta$  is the genotype  $\mathbf{y}$ , the geno-phenotype  $\mathbf{z}$ , or the geno-envo-phenotype  $\mathbf{m}$ , provided that the developmental  
1116 and environmental constraints are satisfied throughout. In contrast, Layer 7, Eq. 1a and its equivalents are dynamically  
1117 insufficient if  $\zeta$  is the phenotype  $\mathbf{x}$  or the environment  $\boldsymbol{\epsilon}$ , because the evolution of the genotype is not followed but it  
1118 generally affects the system.

1119 In particular, the system is generally dynamically insufficient if only the evolutionary dynamics of the phenotype  
1120 are considered. Let us temporarily assume that the following four conditions hold: (1) development is non-social  
1121 ( $d\mathbf{x}^T/d\bar{\mathbf{z}}|_{\mathbf{y}=\bar{\mathbf{y}}} = \mathbf{0}$ ), and there is (2) no exogenous plastic response of the phenotype ( $[(d\mathbf{x}/d\boldsymbol{\epsilon}^T)(\partial\bar{\boldsymbol{\epsilon}}/\partial\tau)]|_{\mathbf{y}=\bar{\mathbf{y}}} = \mathbf{0}$ ), (3) no  
1122 total immediate selection on the genotype ( $\delta w/\delta\mathbf{y}|_{\mathbf{y}=\bar{\mathbf{y}}} = \mathbf{0}$ ), and (4) no niche-constructed effects of the phenotype on  
1123 fitness ( $[(\partial\boldsymbol{\epsilon}^T/\partial\mathbf{x})(\partial w/\partial\boldsymbol{\epsilon})]|_{\mathbf{y}=\bar{\mathbf{y}}} = \mathbf{0}$ ). Then, the evolutionary dynamics of the phenotype reduces to

$$\frac{d\bar{\mathbf{x}}}{d\tau} \approx \iota \mathbf{H}_{\mathbf{x}} \left. \frac{\partial w}{\partial \mathbf{x}} \right|_{\mathbf{y}=\bar{\mathbf{y}}}. \quad (\text{Layer 7, Eq. 6})$$

1124 This is a mechanistic version of the Lande equation for the phenotype. The mechanistic additive genetic covariance  
1125 matrix of the phenotype (Layer 6, Eq. 5) in this equation is singular because the developmentally initial phenotype is  
1126 not affected by the genotype and the developmentally final genotypic traits do not affect the phenotype (so  $d\mathbf{x}^T/d\mathbf{y}|_{\mathbf{y}=\bar{\mathbf{y}}}$   
1127 has rows and columns that are zero; Appendix C, Eq. C16). This singularity might disappear by removing from  
1128 the analysis the developmentally initial phenotype and developmentally final genotypic traits, provided additional  
1129 conditions hold. Yet, the key point here is that a system describing the evolutionary dynamics of the phenotype  
1130 alone is dynamically insufficient because such system depends on the resident genotype whose evolution must also be  
1131 followed. In particular, setting  $d\bar{\mathbf{x}}/d\tau = \mathbf{0}$  does not generally imply an evolutionary equilibrium, or evolutionary stasis,  
1132 but only an evolutionary isocline in the phenotype, that is, a transient lack of evolutionary change in the phenotype.  
1133 To guarantee a dynamically sufficient description of the evolutionary dynamics of the phenotype, we simultaneously  
1134 consider the evolutionary dynamics of the phenotype and genotype, that is, the geno-phenotype.

1135 Indeed, a dynamically sufficient system can be obtained by describing the dynamics of the geno-phenotype alone  
1136 if the environment is constant or has no evolutionary effect. Let us now assume that the following three condi-  
1137 tions hold: (i) development is non-social ( $d\mathbf{x}^T/d\bar{\mathbf{z}}|_{\mathbf{y}=\bar{\mathbf{y}}} = \mathbf{0}$ ), and there is (ii) no exogenous plastic response of  
1138 the phenotype ( $[(d\mathbf{x}/d\boldsymbol{\epsilon}^T)(\partial\bar{\boldsymbol{\epsilon}}/\partial\tau)]|_{\mathbf{y}=\bar{\mathbf{y}}} = \mathbf{0}$ ), and (iii) no niche-constructed effects of the geno-phenotype on fitness  
1139 ( $[(\partial\boldsymbol{\epsilon}^T/\partial\mathbf{z})(\partial w/\partial\boldsymbol{\epsilon})]|_{\mathbf{y}=\bar{\mathbf{y}}} = \mathbf{0}$ ). Then, the evolutionary dynamics of the geno-phenotype reduces to

$$\frac{d\bar{\mathbf{z}}}{d\tau} \approx \iota \mathbf{H}_{\mathbf{z}} \left. \frac{\partial w}{\partial \mathbf{z}} \right|_{\mathbf{y}=\bar{\mathbf{y}}}. \quad (\text{Layer 7, Eq. 7})$$

1140 This is an extension of the mechanistic version of the Lande equation to consider the geno-phenotype. The mecha-  
1141 nistic additive genetic covariance matrix of the geno-phenotype (Layer 6, Eq. 6) in this equation is singular because



the geno-phenotype  $\mathbf{z}$  includes the genotype  $\mathbf{y}$  (so  $d\mathbf{z}^T/d\mathbf{y}$  has fewer rows than columns; Layer 4, Eq. 8). Hence, the degrees of freedom of genetic covariation in geno-phenotype space are at most given by the number of lifetime genotypic traits, so these degrees of freedom are bounded by genotypic space in a necessarily larger geno-phenotype space. Thus,  $\mathbf{H}_z$  is singular if there is at least one trait that is developmentally constructed according to the developmental map (Layer 7, Eq. 1b). The evolutionary dynamics of the geno-phenotype is now fully determined by Layer 7, Eq. 7 provided that i-iii hold and that the developmental (Layer 7, Eq. 1b) and environmental (Layer 7, Eq. 1c) constraints are met. In such case, setting  $d\bar{\mathbf{z}}/d\tau = \mathbf{0}$  does imply an evolutionary equilibrium, but this does not imply absence of direct directional selection on the geno-phenotype (i.e., it is possible that  $\partial w/\partial \mathbf{z}|_{\mathbf{y}=\bar{\mathbf{y}}} \neq \mathbf{0}$ ) since  $\mathbf{H}_z$  is always singular. Due to this singularity, if there is any evolutionary equilibrium, there is an infinite number of them. Kirkpatrick and Lofsvold (1992) showed that if  $\mathbf{G}$  is singular and constant, then the evolutionary equilibrium that is achieved depends on the initial conditions. Our results extend the relevance of Kirkpatrick and Lofsvold's (1992) observation by showing that  $\mathbf{H}_z$  is always singular and remains so as it evolves. Moreover, since both the developmental (Eq. Layer 7, Eq. 1b) and environmental (Eq. Layer 7, Eq. 1c) constraints must be satisfied throughout the evolutionary process, the developmental and environmental constraints determine the admissible evolutionary trajectory and the admissible evolutionary equilibria if mutational variation exists in all directions of genotype space. Therefore, developmental and environmental constraints together with direct directional selection jointly define the evolutionary outcome if mutational variation exists in all directions of genotype space.

Since selection response is relatively completely described by total genotypic selection, further insight can be gained by rearranging the extended mechanistic Lande equation for the geno-phenotype (Layer 7, Eq. 7) in terms of total genotypic selection. Using the rearrangement in Layer 7, Eq. 5 and making the assumptions i-iii in the previous paragraph, the extended mechanistic Lande equation in Layer 7, Eq. 7 becomes

$$\frac{d\bar{\mathbf{z}}}{d\tau} \approx \iota \mathbf{H}_{zy} \left. \frac{d\mathbf{w}}{d\mathbf{y}} \right|_{\mathbf{y}=\bar{\mathbf{y}}}. \quad (\text{Layer 7, Eq. 8})$$

This equation is closely related to but different from Morrissey's (2014) Eq. 4, which uses a different factorization of the constraining matrix (here  $\mathbf{H}_z$ , there Lande's  $\mathbf{G}$ ) in terms of a square total effect matrix of all traits on themselves (his  $\Phi$  in his Eq. 2) and so Morrissey's equation is in terms of the total selection gradient of the phenotype rather than of the genotype. Also, being a rearrangement of the classic Lande equation, Morrissey's equation refers to the selection response of the phenotype rather than of the geno-phenotype and is thus dynamically insufficient. A dynamically sufficient equation with a factorization of the constraining matrix analogous to Morrissey's factorization is obtained in Eq. (H4), which is in terms of the total selection gradient of the geno-phenotype premultiplied by a necessarily singular matrix so such total selection gradient is not sufficient to identify evolutionary equilibria. In contrast, in Layer 7, Eq. 8, if the mutational covariance matrix  $\mathbf{H}_y$  is non-singular, then the mechanistic additive genetic cross-covariance matrix between geno-phenotype and genotype  $\mathbf{H}_{zy}$  is non-singular so evolutionary equilibrium ( $d\bar{\mathbf{z}}/d\tau = \mathbf{0}$ ) implies absence of total genotypic selection (i.e.,  $d\mathbf{w}/d\mathbf{y}|_{\mathbf{y}=\bar{\mathbf{y}}} = \mathbf{0}$ ) to first order of approximation. Indeed, to first order, lack of total genotypic selection provides a necessary and sufficient condition for evolutionary equilibria in the absence of

1175 exogenous environmental change and of absolute mutational constraints (Layer 7, Eq. 5) (see Supplementary Infor-  
 1176 mation section 2.2 for a definition of absolute mutational or genetic constraints). Consequently, evolutionary equilibria  
 1177 depend on development and niche construction since total genotypic selection depends on Wagner’s (1984, 1989) de-  
 1178 velopmental matrix and on total niche construction by the genotype (Layer 4, Eq. 22). However, since  $dw/dy|_{y=\bar{y}} = \mathbf{0}$   
 1179 has only as many equations as there are lifetime genotypic traits and since not only the genotype but also the phenotype  
 1180 and environmental traits must be determined, then  $dw/dy|_{y=\bar{y}} = \mathbf{0}$  provides fewer equations than variables to solve for.  
 1181 Hence, absence of total genotypic selection still implies an infinite number of evolutionary equilibria. Again, only the  
 1182 subset of evolutionary equilibria that satisfy the developmental (Layer 7, Eq. 1b) and environmental (Layer 7, Eq. 1c)  
 1183 constraints are admissible, and so the number of admissible evolutionary equilibria may be finite. Therefore, admis-  
 1184 sible evolutionary equilibria have a dual dependence on developmental and environmental constraints: first, by the  
 1185 constraints’ influence on total genotypic selection and so on evolutionary equilibria; and second, by the constraints’  
 1186 specification of which evolutionary equilibria are admissible.

1187 Because we assume that mutants arise when residents are at carrying capacity, the analogous statements can be  
 1188 made for the evolutionary dynamics of a resident vector in terms of lifetime reproductive success (Eq. 8). Using the  
 1189 relationship between selection gradients in terms of fitness and of expected lifetime reproductive success (Eqs. S22),  
 1190 the evolutionary dynamics of  $\zeta \in \{\mathbf{x}, \mathbf{y}, \mathbf{z}, \boldsymbol{\epsilon}, \mathbf{m}\}$  (Layer 7, Eq. 1a) are equivalently given by

$$\frac{d\bar{\zeta}}{d\tau} \approx \left( \iota \frac{1}{T} \mathbf{L}_{\zeta\mathbf{m}} \frac{\partial R_0}{\partial \mathbf{m}} + \frac{s\zeta}{s\boldsymbol{\epsilon}^\top} \frac{\partial \boldsymbol{\epsilon}}{\partial \tau} \right) \Bigg|_{y=\bar{y}} \quad (\text{Layer 7, Eq. 9a})$$

$$= \left( \iota \frac{1}{T} \mathbf{L}_{\zeta\mathbf{z}} \frac{\delta R_0}{\delta \mathbf{z}} + \frac{s\zeta}{s\boldsymbol{\epsilon}^\top} \frac{\partial \boldsymbol{\epsilon}}{\partial \tau} \right) \Bigg|_{y=\bar{y}} \quad (\text{Layer 7, Eq. 9b})$$

$$= \left( \iota \frac{1}{T} \mathbf{L}_{\zeta\mathbf{y}} \frac{dR_0}{dy} + \frac{s\zeta}{s\boldsymbol{\epsilon}^\top} \frac{\partial \boldsymbol{\epsilon}}{\partial \tau} \right) \Bigg|_{y=\bar{y}} . \quad (\text{Layer 7, Eq. 9c})$$

1191 To close, the evolutionary dynamics of the environment can be written in a particular form that is insightful. In  
 1192 Appendix I, we show that the evolutionary dynamics of the environment is given by

$$\frac{d\bar{\boldsymbol{\epsilon}}}{d\tau} = \left( \frac{\partial(\boldsymbol{\epsilon} + \check{\boldsymbol{\epsilon}})}{\partial \mathbf{z}^\top} \frac{d\bar{\mathbf{z}}}{d\tau} + \frac{\partial \boldsymbol{\epsilon}}{\partial \tau} \right) \Bigg|_{y=\bar{y}} . \quad (\text{Layer 7, Eq. 10})$$

1193 Thus, the evolutionary change of the environment comprises “inclusive” endogenous environmental change and ex-  
 1194 ogenous environmental change.

## 1195 5. Example: allocation to growth vs reproduction

1196 We now provide an example that illustrates some of the points above. To do this, we use a life-history model rather  
 1197 than a model of morphological development as the former is simpler yet sufficient to illustrate the points. In particular,  
 1198 this example shows that our results above enable direct calculation of the evo-devo dynamics and the evolution of the  
 1199 constraining matrices  $\mathbf{H}$  and  $\mathbf{L}$  and provide an alternative method to dynamic optimization to identify the evolutionary  
 1200 outcomes under explicit developmental constraints. We first describe the example where development is non-social  
 1201 and then extend the example to make development social.

### 5.1. Non-social development

We consider the classic life-history problem of modeling the evolution of resource allocation to growth vs reproduction (Gadgil and Bossert, 1970; León, 1976; Schaffer, 1983; Stearns, 1992; Roff, 1992; Kozłowski and Teriokhin, 1999). Let there be one phenotype (or state variable), one genotypic trait (or control variable), and no environmental traits. In particular, let  $x_a$  be a mutant's phenotype at age  $a$  (e.g., body size or resources available) and  $y_a \in [0, 1]$  be the mutant's fraction of resource allocated to phenotype growth at that age. Let mutant survival probability  $p_a = p$  be constant for all  $a \in \{1, \dots, N_a - 1\}$  with  $p_{N_a} = 0$ , so survivorship is  $\ell_a = p^{a-1}$  for all  $a \in \{1, \dots, N_a\}$  with  $\ell_{N_a+1} = 0$ . Let mutant fertility be

$$f_a = d(\bar{\mathbf{z}})(1 - y_a)x_a,$$

where  $(1 - y_a)x_a$  is the resource a mutant allocates to reproduction at age  $a$  and  $d(\bar{\mathbf{z}})$  is a positive density-dependent scalar that brings the resident population size to carrying capacity. Let the developmental constraint be

$$x_{a+1} = g_a(\mathbf{z}_a, \bar{\mathbf{z}}) = x_a + y_a x_a = (1 + y_a)x_a, \quad (\text{Example, Eq. 1})$$

where  $y_a x_a$  is the resource a mutant allocates to growth at age  $a$ . These equations are a simplification of those used in the classic life-history problem of finding the optimal resource allocation to growth vs reproduction in discrete age (Gadgil and Bossert, 1970; León, 1976; Schaffer, 1983; Stearns, 1992; Roff, 1992; Kozłowski and Teriokhin, 1999). In life-history theory, one assumes that at evolutionary equilibrium, a measure of fitness such as lifetime reproductive success is maximized by an optimal control  $\mathbf{y}^*$  yielding an optimal pair  $(\mathbf{x}^*, \mathbf{y}^*)$  that is obtained with dynamic programming or optimal control theory (Sydsæter et al., 2008). Instead, here we illustrate how the evolutionary dynamics of  $(\bar{\mathbf{x}}, \bar{\mathbf{y}})$  can be analysed with the equations derived in this paper, including identification of an optimal pair  $(\mathbf{x}^*, \mathbf{y}^*)$ .

Let us calculate the elements of Layers 2-4 that we need to calculate genetic covariation and the evolutionary dynamics. Because there are no environmental traits, total immediate effects equal direct effects. Also, because development is non-social, stabilized effects equal total effects (except for social feedback, which is simply the identity matrix). Iterating the recurrence given by the developmental constraint (Example, Eq. 1) yields the mutant phenotype at age  $a$

$$x_a = x_1 \prod_{k=1}^{a-1} (1 + y_k). \quad (\text{Example, Eq. 2})$$

To find the density-dependent scalar, we note that a resident at carrying capacity satisfies the Euler-Lotka equation  $\sum_{a=1}^{N_a} f_a^\circ \ell_a = 1$  (Eq. S34), which yields

$$d(\bar{\mathbf{z}}) = \frac{1}{\sum_{a=1}^{N_a} (1 - \bar{y}_a) \bar{x}_a \ell_a}.$$

Using Eq. (5a), the entries of the direct selection gradients are given by

$$\left. \frac{\partial w}{\partial x_a} \right|_{\mathbf{y}=\bar{\mathbf{y}}} = \sum_{j=1}^{N_a} \left. \frac{\partial w_j}{\partial x_a} \right|_{\mathbf{y}=\bar{\mathbf{y}}} = \left. \frac{\partial w_a}{\partial x_a} \right|_{\mathbf{y}=\bar{\mathbf{y}}}$$

$$\begin{aligned}
 &= \frac{1}{T} \left( \phi_a \frac{\partial f_a}{\partial x_a} + \pi_a \frac{\partial p_a}{\partial x_a} \right) \Big|_{\mathbf{y}=\bar{\mathbf{y}}} = \frac{1}{\tilde{T}} \ell_a (1 - \bar{y}_a), \\
 \frac{\partial w}{\partial y_a} \Big|_{\mathbf{y}=\bar{\mathbf{y}}} &= \sum_{j=1}^{N_a} \frac{\partial w_j}{\partial y_a} \Big|_{\mathbf{y}=\bar{\mathbf{y}}} = \frac{\partial w_a}{\partial y_a} \Big|_{\mathbf{y}=\bar{\mathbf{y}}} \\
 &= \frac{1}{T} \left( \phi_a \frac{\partial f_a}{\partial y_a} + \pi_a \frac{\partial p_a}{\partial y_a} \right) \Big|_{\mathbf{y}=\bar{\mathbf{y}}} = -\frac{1}{\tilde{T}} \ell_a \bar{x}_a.
 \end{aligned} \tag{Example, Eq. 3}$$

1227 where the generation time without density dependence is

$$\tilde{T} = \sum_{j=1}^{N_a} j \ell_j (1 - \bar{y}_j) \bar{x}_j.$$

1228 Thus, there is always direct selection for increased phenotype and against allocation to growth (except at the bound-  
 1229 aries where  $\bar{y}_a = 1$  or  $\bar{x}_a = 0$ ). The entries of the matrices of direct effects on the phenotype ( $a$ : row,  $j$ : column) are  
 1230 given by

$$\begin{aligned}
 \frac{\partial x_j}{\partial x_a} \Big|_{\mathbf{y}=\bar{\mathbf{y}}} &= \begin{cases} 1 + \bar{y}_a & \text{if } j = a + 1 \\ 1 & \text{if } j = a \\ 0 & \text{otherwise,} \end{cases} \\
 \frac{\partial x_j}{\partial y_a} \Big|_{\mathbf{y}=\bar{\mathbf{y}}} &= \begin{cases} \bar{x}_a & \text{if } j = a + 1 \\ 0 & \text{otherwise.} \end{cases}
 \end{aligned}$$

1231 Using Layer 4, Eq. 2 and Eq. (C15), the entries of the matrices of total effects on the phenotype are given by

$$\begin{aligned}
 \frac{dx_j}{dx_a} \Big|_{\mathbf{y}=\bar{\mathbf{y}}} &= \begin{cases} \prod_{k=a}^{j-1} \frac{\partial x_{k+1}}{\partial x_k} \Big|_{\mathbf{y}=\bar{\mathbf{y}}} & \text{if } j > a \\ 1 & \text{if } j = a \\ 0 & \text{otherwise} \end{cases} \\
 &= \begin{cases} \prod_{k=a}^{j-1} (1 + \bar{y}_k) & \text{if } j > a \\ 1 & \text{if } j = a \\ 0 & \text{otherwise,} \end{cases} \\
 \frac{dx_j}{dy_a} \Big|_{\mathbf{y}=\bar{\mathbf{y}}} &= \begin{cases} \left( \frac{\partial x_{a+1}}{\partial y_a} \prod_{k=a+1}^{j-1} \frac{\partial x_{k+1}}{\partial x_k} \right) \Big|_{\mathbf{y}=\bar{\mathbf{y}}} & \text{if } j > a + 1 \\ \frac{\partial x_{a+1}}{\partial y_a} \Big|_{\mathbf{y}=\bar{\mathbf{y}}} & \text{if } j = a + 1 \\ 0 & \text{otherwise} \end{cases}
 \end{aligned}$$

$$= \begin{cases} \bar{x}_a \prod_{k=a+1}^{j-1} (1 + \bar{y}_k) & \text{if } j > a + 1 \\ \bar{x}_a & \text{if } j = a + 1 \\ 0 & \text{otherwise.} \end{cases} \quad (\text{Example, Eq. 4})$$

Then, using Layer 4, Eq. 21 and Layer 4, Eq. 22, the entries of the total selection gradients are given by

1232

$$\begin{aligned} \left. \frac{dw}{dx_a} \right|_{y=\bar{y}} &= \left( \frac{d\mathbf{x}^\top}{dx_a} \frac{\partial w}{\partial \mathbf{x}} \right) \Big|_{y=\bar{y}} = \sum_{j=1}^{N_a} \left( \frac{dx_j}{dx_a} \frac{\partial w}{\partial x_j} \right) \Big|_{y=\bar{y}} \\ &= \left( \frac{dx_a}{dx_a} \frac{\partial w}{\partial x_a} + \sum_{j=a+1}^{N_a} \frac{dx_j}{dx_a} \frac{\partial w}{\partial x_j} \right) \Big|_{y=\bar{y}} \\ &= \frac{1}{\bar{T}} \left[ \ell_a (1 - \bar{y}_a) + \sum_{j=a+1}^{N_a} \ell_j (1 - \bar{y}_j) \prod_{k=a}^{j-1} (1 + \bar{y}_k) \right], \\ \left. \frac{dw}{dy_a} \right|_{y=\bar{y}} &= \left( \frac{\partial w}{\partial y_a} + \frac{d\mathbf{x}^\top}{dy_a} \frac{\partial w}{\partial \mathbf{x}} \right) \Big|_{y=\bar{y}} = \left( \frac{\partial w}{\partial y_a} + \sum_{j=1}^{N_a} \frac{dx_j}{dy_a} \frac{\partial w}{\partial x_j} \right) \Big|_{y=\bar{y}} \\ &= \left( \frac{\partial w}{\partial y_a} + \frac{dx_{a+1}}{dy_a} \frac{\partial w}{\partial x_{a+1}} + \sum_{j=a+2}^{N_a} \frac{dx_j}{dy_a} \frac{\partial w}{\partial x_j} \right) \Big|_{y=\bar{y}} \\ &= -\frac{1}{\bar{T}} \ell_a \bar{x}_a + \bar{x}_a \frac{1}{\bar{T}} \ell_{a+1} (1 - \bar{y}_{a+1}) \\ &\quad + \sum_{j=a+2}^{N_a} \bar{x}_a \prod_{k=a+1}^{j-1} (1 + \bar{y}_k) \frac{1}{\bar{T}} \ell_j (1 - \bar{y}_j) \\ &= \frac{1}{\bar{T}} \bar{x}_a \left[ -\ell_a + \sum_{j=a+1}^{N_a} \ell_j (1 - \bar{y}_j) \prod_{k=a+1}^{j-1} (1 + \bar{y}_k) \right], \end{aligned} \quad (\text{Example, Eq. 5})$$

where we use the empty-product notation such that  $\prod_{k=a}^{a-1} F_k = 1$  and the empty-sum notation such that  $\sum_{k=a}^{a-1} F_k = 0$  for any  $F_k$ . There is thus always total selection for increased phenotype (except at the boundaries), although total selection for allocation to growth may be positive or negative.

1233

1234

1235

Now, using Eqs. (1) and (3), the evo-devo dynamics are given by

1236

$$\begin{aligned} \frac{\Delta \bar{y}}{\Delta \tau} &\approx \iota \mathbf{H}_y \left. \frac{dw}{dy} \right|_{y=\bar{y}} \\ \bar{x}_{a+1} &= g_a(\bar{\mathbf{z}}_a, \bar{\mathbf{z}}). \end{aligned} \quad (\text{Example, Eq. 6})$$

Using Layer 7, Eq. 1a, Layer 7, Eq. 4, and Layer 7, Eq. 5, the evolutionary dynamics of the phenotype in the limit as  $\Delta \tau \rightarrow 0$  are given by

1237

1238

$$\frac{d\bar{\mathbf{x}}}{d\tau} \approx \iota \mathbf{H}_{\mathbf{z}\mathbf{x}} \left. \frac{\partial w}{\partial \mathbf{z}} \right|_{y=\bar{y}} = \iota \mathbf{H}_{\mathbf{x}\mathbf{y}} \left. \frac{dw}{dy} \right|_{y=\bar{y}}.$$

(Example, Eq. 7)

Note these are not equations in Lande's form. In particular, the mechanistic additive genetic-cross covariance matrices involved are not symmetric and the selection gradients are not those of the evolving trait in the left-hand side; Example,

1239

1240

Eq. 7 cannot be arranged in Lande's form because the genotypic trait directly affects fitness (i.e.,  $\partial w / \partial \mathbf{y} |_{\mathbf{y}=\bar{\mathbf{y}}} \neq \mathbf{0}$ ; Example, Eq. 3). Importantly,  $\mathbf{H}_{\mathbf{z}\mathbf{z}}$  and  $\mathbf{H}_{\mathbf{z}\mathbf{y}}$  depend on  $\bar{\mathbf{y}}$  because of gene-phenotype interaction in development (i.e., the developmental map involves a product  $y_a x_a$  such that the total effect of the genotype on the phenotype depends on the genotype; Example, Eq. 4); consequently, Example, Eq. 7 is dynamically insufficient because the system does not describe the evolution of  $\bar{\mathbf{y}}$ . In turn, the evolutionary dynamics of the geno-phenotype are given by

$$\frac{d\bar{\mathbf{z}}}{d\tau} \approx \iota \mathbf{H}_{\mathbf{z}} \left. \frac{\partial w}{\partial \mathbf{z}} \right|_{\mathbf{y}=\bar{\mathbf{y}}} = \iota \mathbf{H}_{\mathbf{z}\mathbf{y}} \left. \frac{dw}{d\mathbf{y}} \right|_{\mathbf{y}=\bar{\mathbf{y}}}. \quad (\text{Example, Eq. 8})$$

This system contains dynamic equations for all the evolutionarily dynamic variables, namely both the resident phenotype  $\bar{\mathbf{x}}$  and the resident genotype  $\bar{\mathbf{y}}$ , so it is determined and dynamically sufficient. The first equality in Example, Eq. 8 is in Lande's form, but  $\mathbf{H}_{\mathbf{z}}$  is always singular. In contrast, the matrix  $\mathbf{H}_{\mathbf{z}\mathbf{y}}$  in the second equality is non-singular if the mutational covariance matrix  $\mathbf{H}_{\mathbf{y}}$  is non-singular. Thus, the total selection gradient of the genotype provides a relatively complete description of the evolutionary process of the geno-phenotype.

Let the entries of the mutational covariance matrix be given by

$$H_{y_a y_j} = \begin{cases} \gamma \bar{y}_a (1 - \bar{y}_a) & \text{if } j = a \\ 0 & \text{otherwise,} \end{cases}$$

where  $0 < \gamma \ll 1$  so the assumption of marginally small mutational variance, namely  $0 < \text{tr}(\mathbf{H}_{\mathbf{y}}) \ll 1$ , holds. Thus,  $\mathbf{H}_{\mathbf{y}}$  is diagonal and becomes singular only at the boundaries where the resident genotype is zero or one. Then, from Example, Eq. 6, the evolutionary equilibria of the genotypic trait at a given age and their stability are given by the sign of its corresponding total selection gradient.

Let us now find the evolutionary equilibria and their stability for the genotypic trait. Using Example, Eq. 5, starting from the last age, the total selection on the genotypic trait at this age is

$$\left. \frac{dw}{dy_{N_a}} \right|_{\mathbf{y}=\bar{\mathbf{y}}} \propto -\ell_{N_a},$$

which is always negative so the stable resident genotypic trait at the last age is

$$\bar{y}_{N_a}^* = 0. \quad (\text{Example, Eq. 9a})$$

That is, no allocation to growth at the last age. Continuing with the second-to-last age, the total selection on the genotypic trait at this age is

$$\begin{aligned} \left. \frac{dw}{dy_{N_a-1}} \right|_{\mathbf{y}=\bar{\mathbf{y}}} &\propto -\ell_{N_a-1} + \sum_{j=N_a}^{N_a} \ell_j (1 - \bar{y}_j) \prod_{k=N_a}^{j-1} (1 + \bar{y}_k) \\ &= -\ell_{N_a-1} + \ell_{N_a} (1 - \bar{y}_{N_a}). \end{aligned}$$

Evaluating at the optimal genotypic trait at the last age (Example, Eq. 9a) and substituting  $\ell_a = p^{a-1}$  yields

$$\left. \frac{dw}{dy_{N_a-1}} \right|_{\mathbf{y}=\bar{\mathbf{y}}^*} \propto -p^{N_a-2} + p^{N_a-1} \propto -1 + p,$$

which is negative (assuming  $p < 1$ ) so the stable resident genotypic trait at the second-to-last age is

1262

$$\bar{y}_{N_a-1}^* = 0. \quad (\text{Example, Eq. 9b})$$

Continuing with the third-to-last age, the total selection on the genotypic trait at this age is

1263

$$\begin{aligned} \left. \frac{dw}{dy_{N_a-2}} \right|_{\mathbf{y}=\bar{\mathbf{y}}} &\propto -\ell_{N_a-2} + \sum_{j=N_a-1}^{N_a} \ell_j(1-\bar{y}_j) \prod_{k=N_a-1}^{j-1} (1+\bar{y}_k) \\ &= -\ell_{N_a-2} + \ell_{N_a-1}(1-\bar{y}_{N_a-1}) \\ &\quad + \ell_{N_a}(1-\bar{y}_{N_a})(1+\bar{y}_{N_a-1}). \end{aligned}$$

Evaluating at the optimal genotypic trait at the last two ages (Example, Eq. 9a and Example, Eq. 9b) and substituting

1264

$\ell_a = p^{a-1}$  yields

1265

$$\left. \frac{dw}{dy_{N_a-2}} \right|_{\mathbf{y}=\bar{\mathbf{y}}^*} \propto -p^{N_a-3} + p^{N_a-2} + p^{N_a-1} \propto -1 + p + p^2,$$

which is positive if

1266

$$p > p_{N_a-2}^* = \frac{1}{2}(-1 + \sqrt{5}) \approx 0.62.$$

So the stable resident genotypic trait at the third-to-last age is

1267

$$\bar{y}_{N_a-2}^* = \begin{cases} 0 & \text{if } p < p_{N_a-2}^* = \frac{1}{2}(-1 + \sqrt{5}) \approx 0.62 \\ 1 & \text{if } p > p_{N_a-2}^* = \frac{1}{2}(-1 + \sqrt{5}) \approx 0.62. \end{cases} \quad (\text{Example, Eq. 9c})$$

If  $p = p_{N_a-2}^*$ , the genotypic trait at such age is selectively neutral, but we ignore this case as without an evolutionary

1268

model for  $p$  it is biologically unlikely that survival is and remains at such precise value. Hence, there is no allocation

1269

to growth at this age for low survival and full allocation for high survival. Continuing with the fourth-to-last age, the

1270

total selection on the genotypic trait at this age is

1271

$$\begin{aligned} \left. \frac{dw}{dy_{N_a-3}} \right|_{\mathbf{y}=\bar{\mathbf{y}}} &\propto -\ell_{N_a-3} + \sum_{j=N_a-2}^{N_a} \ell_j(1-\bar{y}_j) \prod_{k=N_a-2}^{j-1} (1+\bar{y}_k) \\ &= -\ell_{N_a-3} + \ell_{N_a-2}(1-\bar{y}_{N_a-2}) \\ &\quad + \ell_{N_a-1}(1-\bar{y}_{N_a-1})(1+\bar{y}_{N_a-2}) \\ &\quad + \ell_{N_a}(1-\bar{y}_{N_a})(1+\bar{y}_{N_a-2})(1+\bar{y}_{N_a-1}). \end{aligned}$$

Evaluating at the optimal genotypic trait at the last three ages (Example, Eq. 9a-Example, Eq. 9c) and substituting

1272

$\ell_a = p^{a-1}$  yields

1273

$$\left. \frac{dw}{dy_{N_a-3}} \right|_{\mathbf{y}=\bar{\mathbf{y}}^*} \propto -p^{N_a-4} + p^{N_a-3}(1-y_{N_a-2}^*) + p^{N_a-2}(1+y_{N_a-2}^*)$$

$$+ p^{N_a-1}(1 + y_{N_a-2}^*)$$

$$\propto -1 + p(1 - y_{N_a-2}^*) + p^2(1 + p)(1 + y_{N_a-2}^*).$$

1274 If  $p < p_{N_a-2}^*$ , this is

$$\left. \frac{dw}{dy_{N_a-3}} \right|_{y=\bar{y}^*} \propto -1 + p + p^2(1 + p),$$

1275 which is positive if

$$p > p_{N_a-3}^* \approx 0.54.$$

1276 If  $p > p_{N_a-2}^*$ , the gradient is

$$\left. \frac{dw}{dy_{N_a-3}} \right|_{y=\bar{y}^*} \propto -1 + 2p^2(1 + p),$$

1277 which is positive if

$$p > \tilde{p}_{N_a-3}^* \approx 0.565.$$

1278 Hence, the stable resident genotypic trait at the fourth-to-last age is

$$\bar{y}_{N_a-3}^* = \begin{cases} 0 & \text{if } p < p_{N_a-3}^* \approx 0.54 \\ 1 & \text{if } p > p_{N_a-3}^* \approx 0.54, \end{cases} \quad (\text{Example, Eq. 9d})$$

1279 for  $p \neq p_{N_a-2}^* \approx 0.62$ . Again, this is no allocation to growth for low survival, although at this earlier age survival can  
 1280 be smaller for allocation to growth to evolve. Numerical solution for the evo-devo dynamics using Example, Eq. 6 is  
 1281 given in Fig. 5. The associated evolution of the  $\mathbf{H}_z$  matrix, plotting Layer 6, Eq. 6, is given in Fig. 6. The code used  
 1282 to generate these figures is in the Supplementary Information.

## 1283 5.2. Social development

1284 Consider a slight modification of the previous example, so that development is social. Let the mutant fertility be

$$f_a = d(\bar{\mathbf{z}})(1 - y_a)(x_a + q\bar{x}_{a+1}),$$

1285 where the available resource is now given by  $x_a + q\bar{x}_{a+1}$  for some constant  $q$  (positive, negative, or zero). Here the  
 1286 source of social development can be variously interpreted, including that an immediately older resident contributes to  
 1287 (positive  $q$ ) or scrounges from (negative  $q$ ) the resource of the focal individual, or that the focal individual learns from  
 1288 the older resident (positive or negative  $q$  depending on whether learning increases or increases the phenotype). Let  
 1289 the developmental constraint be

$$x_{a+1} = g_a(\mathbf{z}_a, \bar{\mathbf{z}}) = x_a + y_a(x_a + q\bar{x}_{a+1}).$$



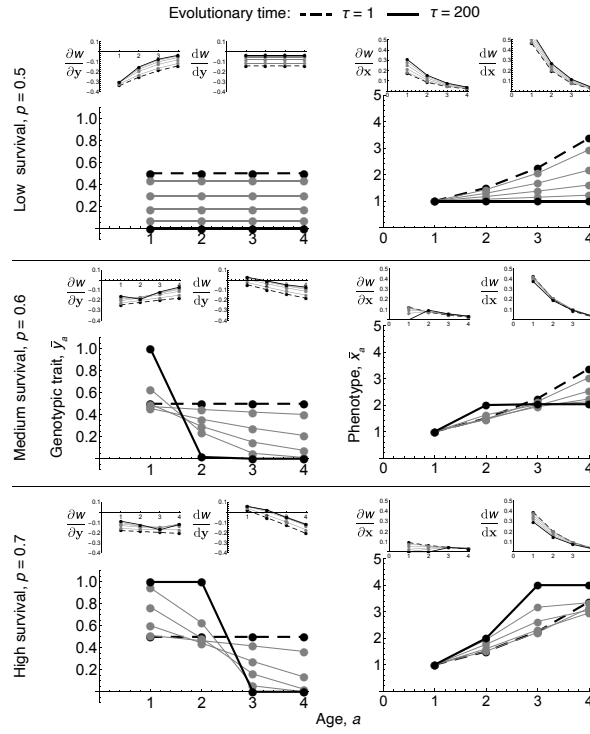

Figure 5: Example. Numerical solution of evolutionary dynamics of the genotype and associated developmental dynamics of the phenotype. Large plots give the resident genotype or phenotype vs age over evolutionary time for various  $p$ . Small plots give the associated direct and total selection gradients. The numerical evolutionary outcomes match the analytical expressions for the genotype (Example, Eq. 9) and associated phenotype (Example, Eq. 2).  $x_1 = \bar{x}_1 = 1$ . From Eq. (S15a), the carrying capacity is  $\bar{n}^* = \bar{n}_1^* \sum_{a=1}^4 p^{a-1}$ . We let  $\bar{n}_1^* = 2/(\mu\gamma)$ , so  $\iota = \gamma^{-1} \sum_{a=1}^4 p^{a-1}$ .

Note that setting the mutant genotype to the resident does not necessarily produce a resident phenotype. Indeed, the phenotype with resident genotype is

$$\bar{x}_{a+1} = \bar{x}_a + \bar{y}_a(\bar{x}_a + q\bar{x}_{a+1}).$$

which may not equal the resident phenotype  $\bar{x}_{a+1}$ . If the resident  $\bar{x}$  is at socio-devo equilibrium  $\bar{x}^{**}$ , then the resident satisfies

$$\bar{x}_{a+1}^{**} = \bar{x}_a^{**} + \bar{y}_a(\bar{x}_a^{**} + q\bar{x}_{a+1}^{**}).$$

Solving for  $\bar{x}_{a+1}^{**}$  yields a recurrence for the resident phenotype at socio-devo equilibrium

$$\bar{x}_{a+1}^{**} = \frac{1 + \bar{y}_a}{1 - q\bar{y}_a} \bar{x}_a^{**} \quad (\text{Example, Eq. 10})$$

provided that  $1 - q\bar{y}_a \neq 0$ . Iterating Example, Eq. 10 yields the resident phenotype at socio-devo equilibrium

$$\bar{x}_a = \bar{x}_1 \prod_{k=1}^{a-1} \frac{1 + \bar{y}_k}{1 - q\bar{y}_k}, \quad (\text{Example, Eq. 11})$$

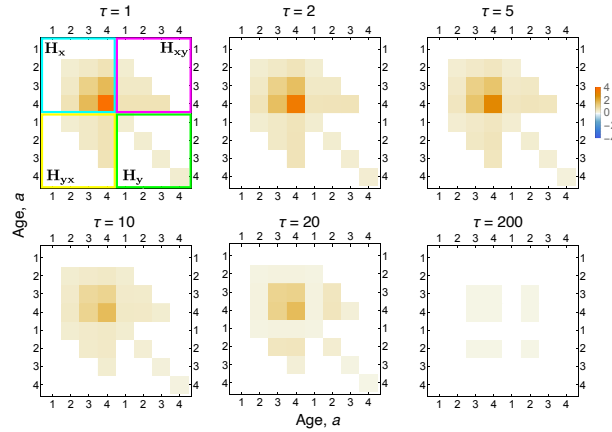

Figure 6: Resulting evolutionary dynamics of the mechanistic additive genetic covariance matrix  $\mathbf{H}_z$ . The upper-left quadrant (blue) is the mechanistic additive genetic covariance matrix  $\mathbf{H}_x$  of the phenotype, that is, of the state variable. For instance, at the initial evolutionary time, the genetic variance for the phenotype is higher at later ages, and the phenotype at age 3 is highly genetically correlated with the phenotype at age 4. As evolutionary time progresses, genetic covariation vanishes as mutational covariation vanishes ( $\mathbf{H}_y$  becomes singular) as genotypic traits approach their boundary values.  $p = 0.7$ . The evolutionary times  $\tau$  shown correspond to those of Fig. 5.

1296 where we drop the \*\* for simplicity. To determine when this socio-devo equilibrium is socio-devo stable, we find the  
 1297 eigenvalues of  $d\mathbf{x}^T/d\bar{\mathbf{x}}|_{\bar{\mathbf{y}}}$  as follows. The entries of the matrix of the direct social effects on the phenotype are given  
 1298 by

$$\left. \frac{\partial x_j}{\partial \bar{x}_a} \right|_{\bar{\mathbf{y}}} = \begin{cases} \bar{y}_{a-1}q & \text{if } j = a \\ 0 & \text{otherwise.} \end{cases}$$

1299 Hence, from Eqs. G8 and G9,  $d\mathbf{x}^T/d\bar{\mathbf{x}}|_{\bar{\mathbf{y}}}$  is upper-triangular, so its eigenvalues are the values in its main diagonal,  
 1300 which are given by  $\partial x_a/\partial \bar{x}_a|_{\bar{\mathbf{y}}} = \bar{y}_{a-1}q$ . Thus, the eigenvalues of  $d\mathbf{x}^T/d\bar{\mathbf{x}}|_{\bar{\mathbf{y}}}$  have absolute value strictly less than  
 1301 one if  $|q| < 1$ , in which case the socio-devo equilibrium in Example, Eq. 11 is socio-devo stable.

1302 Let  $\bar{\mathbf{x}}$  be the SDS resident phenotype given by Example, Eq. 11 with  $|q| < 1$ . Then, the evo-devo dynamics are still  
 1303 given by Example, Eq. 6. Using Layer 7, Eq. 1a, Layer 7, Eq. 4, and Layer 7, Eq. 5, the evolutionary dynamics of the  
 1304 phenotype in the limit as  $\Delta\tau \rightarrow 0$  are now given by

$$\frac{d\bar{\mathbf{x}}}{d\tau} \approx \iota \mathbf{L}_{xz} \left. \frac{\partial w}{\partial \mathbf{z}} \right|_{\bar{\mathbf{y}}} = \iota \mathbf{L}_{xy} \left. \frac{dw}{d\mathbf{y}} \right|_{\bar{\mathbf{y}}}. \quad (\text{Example, Eq. 12})$$

1305 This system is dynamically insufficient as  $\mathbf{L}_{xz}$  and  $\mathbf{L}_{xy}$  depend on  $\bar{\mathbf{y}}$  because of gene-phenotype interaction in devel-  
 1306 opment. In turn, the evolutionary dynamics of the geno-phenotype are given by

$$\frac{d\bar{\mathbf{z}}}{d\tau} \approx \iota \mathbf{L}_z \left. \frac{\partial w}{\partial \mathbf{z}} \right|_{\bar{\mathbf{y}}} = \iota \mathbf{L}_{zy} \left. \frac{dw}{d\mathbf{y}} \right|_{\bar{\mathbf{y}}}. \quad (\text{Example, Eq. 13})$$

1307 This system is dynamically sufficient as it contains dynamic equations for all evolutionarily dynamic variables, namely  
 1308 both  $\bar{\mathbf{x}}$  and  $\bar{\mathbf{y}}$ . While  $\mathbf{L}_z$  in the first equality is always singular, the matrix  $\mathbf{L}_{zy}$  in the second equality is non-singular if

the mutational covariance matrix  $\mathbf{H}_y$  is non-singular. Thus, the total selection gradient of the genotype still provides a relatively complete description of the evolutionary process of the geno-phenotype.

We can similarly find that the total selection gradient of the genotypic trait at age  $a$  is

$$\left. \frac{dw}{dy_a} \right|_{y=\bar{y}} = \frac{1}{\tilde{T}} \bar{x}_a \frac{1+q}{1-q\bar{y}_a} \left[ -\ell_a + \sum_{j=a+1}^{N_a} \ell_j (1-\bar{y}_j) \prod_{k=a+1}^{j-1} (1+\bar{y}_k) \right],$$

where the generation time without density dependence is now

$$\tilde{T} = \sum_{j=1}^{N_a} j \ell_j (1-\bar{y}_j) \bar{x}_j \frac{1+q}{1-q\bar{y}_j}.$$

This total selection gradient of the genotypic trait at age  $a$  has the same sign as that found in the model for non-social development (Example, Eq. 5). Hence, the stable evolutionary equilibria for the genotype are still given by Example, Eq. 9. Yet, the associated phenotype, given by Example, Eq. 11, may be different due to social development (Fig. 7). That is, social development here does not affect the evolutionary equilibria, as it does not affect the zeros of the total selection gradient of the genotype which gives the zeros of the evolutionary dynamics of the geno-phenotype (Example, Eq. 13). Instead, social development affects here the developmental constraint so it affects the admissible evolutionary equilibria of the phenotype. Numerical solution for the evo-devo dynamics using Example, Eq. 6 is given in Fig. 7. For the  $q$  chosen, the phenotype evolves to much larger values due to social feedback than with non-social development although the genotype evolves to the same values. The associated evolution of the  $\mathbf{L}_z$  matrix, using Layer 6, Eq. 9, is given in Fig. 8. The code used to generate these figures is in the Supplementary Information.

## 6. Discussion

We have addressed the question of how development affects evolution by formulating a mathematical framework that integrates explicit developmental dynamics into evolutionary dynamics. The framework integrates age progression, explicit developmental constraints according to which the phenotype is constructed across life, and evolutionary dynamics. This framework yields a description of the structure of genetic covariation, including the developmental matrix  $d\mathbf{x}^\top/d\mathbf{y}|_{y=\bar{y}}$ , from mechanistic processes. The framework also yields a dynamically sufficient description of the evolution of developed phenotypes in gradient form, such that their long-term evolution can be described as the climbing of a fitness landscape within the assumptions made. This framework provides a tractable method to model the evo-devo dynamics for a broad class of models. We also obtain formulas to compute the sensitivity of the solution of a recurrence (here, the phenotype) to perturbations in the solution or parameters at earlier times (here, ages), which are given by  $d\mathbf{x}^\top/d\zeta$  for  $\zeta \in \{\mathbf{x}, \mathbf{y}\}$ . Overall, the framework provides a theory of constrained evolutionary dynamics, where the developmental and environmental constraints determine the admissible evolutionary path (Layer 7, Eq. 1).

Previous understanding suggested that development affects evolution by inducing genetic covariation and genetic constraints, although the nature of such constraints had remained uncertain. We find that genetic constraints are necessarily absolute in a generally dynamically sufficient description of long-term phenotypic evolution in gradient form.

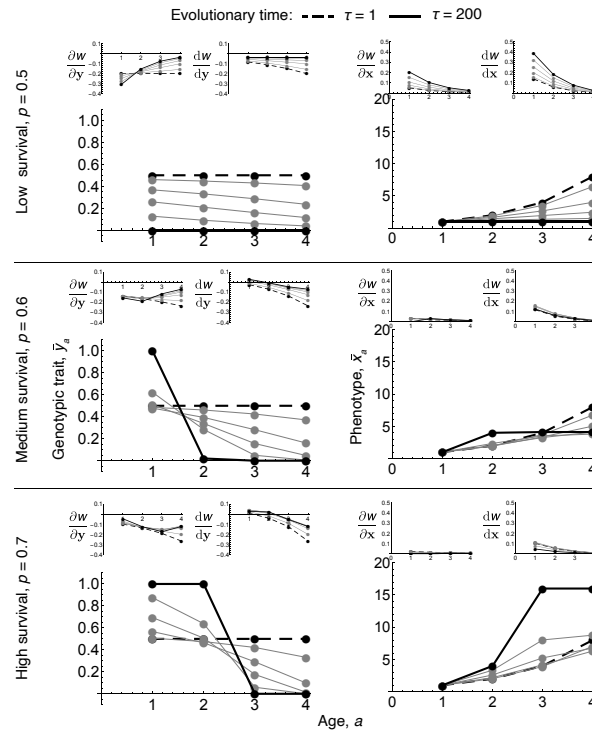

Figure 7: Example with social development. The genotype evolves to the same values as those with non-social development in Fig. 5. However, the phenotype evolves to much larger values due to social development. Large plots give the resident genotype or phenotype vs age over evolutionary time for various  $p$ . Small plots give the associated direct and total selection gradients. The numerical evolutionary dynamics of the genotype match the analytical expressions for the genotype (Example, Eq. 9) and associated phenotype (Example, Eq. 11).  $\iota$  is as in Fig. 5.  $q = 0.5$ .

1338 This is because dynamic sufficiency in general requires that not only phenotypic but also genotypic evolution is fol-  
 1339 lowed. Because the phenotype is related to the genotype via development, simultaneously describing the evolution of  
 1340 the genotype and phenotype in gradient form entails that the associated constraining matrix ( $\mathbf{H}_z$  or  $\mathbf{L}_z$ ) is necessarily  
 1341 singular with a maximum number of degrees of freedom given by the number of lifetime genotypic traits ( $N_a N_g$ ).  
 1342 Consequently, genetic covariation is necessarily absent in as many directions of geno-phenotype space as there are  
 1343 lifetime developed traits ( $N_a N_p$ ). Since the constraining matrix is singular, direct directional selection is insufficient  
 1344 to identify evolutionary equilibria in contrast to common practice. Instead, total genotypic selection, which depends  
 1345 on development, is sufficient to identify evolutionary equilibria if there are no absolute mutational constraints and no  
 1346 exogenous plastic response. The singularity of the constraining matrix associated to direct geno-phenotypic selec-  
 1347 tion entails that if there is any evolutionary equilibrium and no exogenous plastic response, then there is an infinite  
 1348 number of evolutionary equilibria that depend on development; in addition, development determines the admissible  
 1349 evolutionary trajectory and so the admissible equilibria. The adaptive topography in phenotype space is often as-  
 1350 sumed to involve a non-singular  $\mathbf{G}$ -matrix where evolutionary outcomes occur at fitness landscape peaks (i.e., where  
 1351  $\partial w / \partial \mathbf{x}|_{\mathbf{y}=\bar{\mathbf{y}}^*} = \mathbf{0}$ ). In contrast, we find that the evolutionary dynamics differ from that representation in that evolu-

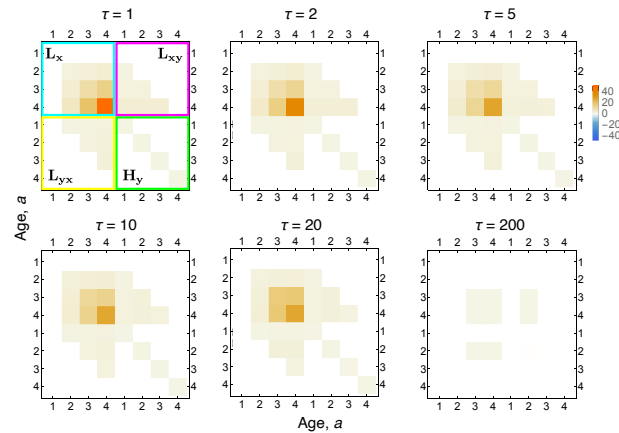

Figure 8: Resulting dynamics of the mechanistic additive socio-genetic cross-covariance matrix  $\mathbf{L}_z$ . The structure and dynamics of  $\mathbf{L}_z$  here are similar to those of  $\mathbf{H}_z$  in Fig. 8 but the magnitudes are an order of magnitude larger (compare bar legends).  $p = 0.7$ ,  $q = 0.5$ . The evolutionary times  $\tau$  shown correspond to those of Fig. 7.

tionary outcomes occur at best (i.e., without absolute mutational constraints) at peaks in the admissible evolutionary path determined by development (i.e., where  $dw/d\mathbf{y}|_{\mathbf{y}=\bar{\mathbf{y}}^*} = \mathbf{0}$ ), and that such path peaks do not typically occur at landscape peaks (so generally  $\partial w/\partial \mathbf{z}|_{\mathbf{y}=\bar{\mathbf{y}}^*} \neq \mathbf{0}$ ).

The singularity of the constraining matrix ( $\mathbf{H}_z$  or  $\mathbf{L}_z$ ) is not due to our adaptive dynamics assumptions. Under quantitative genetics assumptions, the additive genetic covariance matrix of phenotype  $\mathbf{x}$  is  $\mathbf{G}_x = \alpha_x \text{cov}[\mathbf{y}, \mathbf{y}] \alpha_x^T$  as described in the introduction, and here we use the subscripts  $\mathbf{x}$  to highlight that this  $\alpha$  matrix is for the regression coefficients of the phenotype with respect to gene content. Under quantitative genetics assumptions, the matrix  $\text{cov}[\mathbf{y}, \mathbf{y}]$  describes the observed covariance in allele frequency due to any source, so it describes standing covariation in allele frequency. Under our adaptive dynamics assumptions, we obtain an  $\mathbf{H}_x$  matrix that has the same form of  $\mathbf{G}_x$ , but where  $\text{cov}[\mathbf{y}, \mathbf{y}]$  describes the covariance in genotypic traits only due to mutation at the current evolutionary time step among the possible mutations, so it describes (expected) mutational covariation. Regardless of whether  $\text{cov}[\mathbf{y}, \mathbf{y}]$  describes standing covariation in allele frequency or mutational covariation, the additive genetic covariance matrix in geno-phenotype space  $\mathbf{G}_z = \alpha_z \text{cov}[\mathbf{y}, \mathbf{y}] \alpha_z^T$  is always singular because the developmental matrix of the geno-phenotype  $\alpha_z^T$  has fewer rows than columns: that is, the degrees of freedom of  $\mathbf{G}_z$  have an upper bound given by the number of loci (or genetic predictors) while the size of  $\mathbf{G}_z$  is given by the number of loci and of phenotypes. Thus, whether one considers standing or mutational covariation, the additive genetic covariance matrix of the geno-phenotype is always singular. Eliminating traits from the analysis to render  $\mathbf{G}_z$  non-singular as traditionally recommended (Lande, 1979) either renders the gradient system underdetermined and so dynamically insufficient in general (if allele frequency  $\bar{\mathbf{y}}$  is removed), or prevents a description of phenotypic evolution as the climbing of a fitness landscape (if the mean phenotype  $\bar{\mathbf{x}}$  is removed). The singularity of  $\mathbf{H}$  and  $\mathbf{L}$  in geno-phenotype space persists despite evolution of the developmental map, regardless of the number of genotypic traits or phenotypes provided there is any phenotype, and in the

1373 presence of endogenous or exogenous environmental change. Thus, we find that a dynamically sufficient description  
1374 of phenotypic evolution in gradient form generally requires a singular constraining matrix.

1375       Dynamic sufficiency for phenotypic evolution in gradient form requires that the constraining matrix is in geno-  
1376 phenotype space particularly because of non-linear development. The  $\mathbf{H}$ -matrix in phenotype space generally depends  
1377 on the resident genotype via both the mutational covariance matrix and the developmental matrix. The develop-  
1378 mental matrix depends on the resident genotype due to non-linear development, particularly gene-gene interaction,  
1379 gene-phenotype interaction, and gene-environment interaction (see text below Eq. Layer 6, Eq. 5). The analogous  
1380 dependence of  $\mathbf{G}$  on allele frequency holds under quantitative genetics assumptions for the same reasons (Turelli,  
1381 1988; Service and Rose, 1985). If development is linear (i.e., the developmental map for all phenotypes is a linear  
1382 function in all its variables at all ages), the developmental matrix no longer depends on the resident genotype (or allele  
1383 frequency under quantitative genetics assumptions). If in addition the mutational covariance matrix is independent  
1384 of the resident genotype, then the constraining matrix  $\mathbf{H}$  in phenotype space is no longer dependent on the resident  
1385 genotype. Thus, if one assumes linear development and both mutational covariation and phenotypic selection being  
1386 independent of the resident genotype (in addition to no social interactions, no exogenous plastic response, no total  
1387 immediate genotypic selection, and no niche-constructed effects of the phenotype on fitness (Layer 7, Eq. 6)), the  $\mathbf{H}$   
1388 matrix in phenotype space becomes constant and the mechanistic Lande equation (Layer 7, Eq. 6) becomes dynami-  
1389 cally sufficient. However, even simple models of explicit development involve non-linearities (e.g., Example, Eq. 1)  
1390 and mutational covariation depends on the resident genotype whenever the genotype is constrained to take values  
1391 within a finite range (e.g., between zero and one). Thus, consideration of even slightly realistic models of develop-  
1392 ment seems unlikely to allow for a dynamically sufficient mechanistic Lande equation (i.e., following only phenotypic  
1393 evolution).

1394       Extensive research efforts have been devoted to determining the relevance of constraints in adaptive evolution  
1395 (Arnold, 1992; Hine and Blows, 2006; Hansen and Houle, 2008; Jones et al., 2014; Hine et al., 2014; Engen and  
1396 Sæther, 2021). Empirical research has found that the smallest eigenvalue of  $\mathbf{G}$  in phenotype space is often close  
1397 to zero (Kirkpatrick and Lofsvold, 1992; Hine and Blows, 2006; McGuigan and Blows, 2007). Mezey and Houle  
1398 (2005) found a non-singular  $\mathbf{G}$ -matrix for 20 morphological (so, developed) traits in fruit flies. Our results suggest  $\mathbf{G}$   
1399 singularity would still arise in all these studies if enough traits are included so as to guarantee a dynamically sufficient  
1400 description of phenotypic evolution on an adaptive topography (i.e., if allele frequency were included in the analysis  
1401 as part of the multivariate “geno-phenotype”).

1402       Previous theory has offered limited predictions as to when the  $\mathbf{G}$ -matrix would be singular. These include that  
1403 incorporating more traits in the analysis renders  $\mathbf{G}$  more likely to be singular as the traits are more likely to be  
1404 genetically correlated, such as in infinite-dimensional traits (Gomulkiewicz and Kirkpatrick, 1992; Kirkpatrick and  
1405 Lofsvold, 1992). Suggestions to include gene frequency as part of the trait vector in the classic Lande equation (e.g.,  
1406 Barfield et al., 2011) have been made without noticing that doing so entails that the associated  $\mathbf{G}$ -matrix is necessarily  
1407 singular. Kirkpatrick and Lofsvold (1992, p. 962 onwards) showed that, assuming that  $\mathbf{G}$  in phenotypic space is

singular and constant, then the evolutionary trajectory and equilibria depend on the evolutionarily initial conditions of the phenotype. In our framework, the evolutionarily initial conditions of the phenotype are given by the developmental constraint evaluated at the evolutionarily initial genotype and environment. Hence, the evolutionary trajectory and equilibria depend on the developmental constraint, which provides the admissible evolutionary path. Our results thus extend the relevance of Kirkpatrick and Lofsvold's (1992) analysis by our observation that  $\mathbf{H}$  is always singular in geno-phenotype space to yield a generally dynamically sufficient gradient system for the phenotype, even with few traits and evolving  $\mathbf{H}$ .

Multiple mathematical models have addressed the question of the singularity of  $\mathbf{G}$ . Recently, simulation work studying the effect of pleiotropy on the structure of the  $\mathbf{G}$ -matrix found that the smallest eigenvalue of  $\mathbf{G}$  is very small but positive (Engen and Sæther, 2021, Tables 3 and 5). Our findings indicate that this model and others (e.g., Wagner, 1984; Barton and Turelli, 1987; Wagner, 1989; Wagner and Mezey, 2000; Martin, 2014; Morrissey, 2014, 2015) would recover  $\mathbf{G}$ -singularity by considering the geno-phenotype so both allele frequency and phenotype change are part of the gradient system. Other recent simulation work found that a singular  $\mathbf{G}$ -matrix due to few segregating alleles still allows the phenotype to reach its unconstrained optimum if all loci have segregating alleles at some point over the long run, thus allowing for evolutionary change in all directions of phenotype space in the long run (Barton, 2017, Fig. 3). Our results indicate that such a model attains the unconstrained optimum because it assumes that fitness depends on a single phenotype at a single age, and that there is no direct genotypic selection and no niche-constructed effects of the genotype on fitness (i.e., there  $\partial w / \partial \mathbf{y} = \mathbf{0}$  and  $(d\boldsymbol{\epsilon}^T / d\mathbf{y})(\partial w / \partial \boldsymbol{\epsilon}) = \mathbf{0}$ , so  $dw / dy_{ia} = \sum_{j=1}^{N_a} \sum_{k=1}^{N_p} (dx_{kj} / dy_{ia})(\partial w / \partial x_{kj})$ , which since fitness depends on a single trait  $k$  at a single age  $j$  further reduces to  $(dx_{kj} / dy_{ia})(\partial w / \partial x_{kj})$ ; hence,  $dw / dy_{ij} = 0$  for any locus  $I(i)$  and nucleotide  $J(j)$  at the single age  $j$  there implies  $\partial w / \partial x_{kj} = 0$ ; Eq. Layer 4, Eq. 22). Our results show that when at least one of these assumptions does not hold, the unconstrained optimum is not necessarily achieved (as illustrated in Example, Eq. 3 and Fig. 5). In our framework, phenotypic evolution converges at best to constrained fitness optima, which may under certain conditions coincide with unconstrained fitness optima. Convergence to constrained fitness optima under no absolute mutational constraints occurs even with the fewest number of traits allowed in our framework: two, that is, one genotypic trait and one phenotype with one age each (or in a standard quantitative genetics framework, allele frequency at a single locus and one quantitative trait that is a function of such allele frequency). Such constrained adaptation has important implications for biological understanding (see e.g., Kirkpatrick and Lofsvold, 1992; Gomulkiewicz and Kirkpatrick, 1992) and is consistent with empirical observations of lack of selection response in the wild despite selection and genetic variation (Merilä et al., 2001; Hansen and Houle, 2004; Pujol et al., 2018), and of relative lack of stabilizing selection (Kingsolver et al., 2001; Kingsolver and Diamond, 2011).

Our results provide a mechanistic description of breeding value, thus allowing for insight regarding the structure and evolution of the constraining matrix, here  $\mathbf{H}$  or  $\mathbf{L}$ . We have defined mechanistic breeding value, not in terms of regression coefficients as traditionally done, but in terms of total derivatives with components mechanistically arising from lower level processes. This yields a mechanistic description of the constraining matrices in terms of total effects

1443 of the genotype, which recover previous results in terms of regression coefficients and random matrices (Fisher, 1918;  
1444 Wagner, 1984; Barton and Turelli, 1987; Lynch and Walsh, 1998; Martin, 2014; Morrissey, 2014). Matrices of total  
1445 effects of the genotype are mechanistic analogues of Fisher's (1918) additive effects of allelic substitution (his  $\alpha$ )  
1446 and of Wagner's (1984, 1989) developmental matrix (his  $\mathbf{B}$ ). Our formulas for total effects allow one to compute the  
1447 effect of a perturbation of the genotype, phenotype, or environment at an early age on the phenotype at a later age.  
1448 Yet, by being defined from derivatives rather than regression, mechanistic breeding values do not satisfy the classic  
1449 partitioning of phenotypic variance into genetic and "environmental" variances, and so mechanistic heritability can be  
1450 greater than one.

1451 Evolutionary analysis might have been hindered by lack of a mechanistic theory of breeding value and thus of  
1452 the constraining matrix. Ever since Lande (1979) it has been clear that direct directional selection on the phenotype  
1453 would be insufficient to identify evolutionary equilibria if the  $\mathbf{G}$ -matrix were singular (Lande, 1979; Via and Lande,  
1454 1985; Kirkpatrick and Lofsvold, 1992; Gomulkiewicz and Kirkpatrick, 1992). Wagner (1984, 1989) constructed and  
1455 analysed evolutionary models considering developmental maps, and wrote the  $\mathbf{G}$ -matrix in terms of his developmental  
1456 matrix to assess its impact on the maintenance of genetic variation. Yet, without a mechanistic theory of the constrain-  
1457 ing matrix, Wagner (1984, 1988, 1989) and Wagner and Mezey (2000) did not simultaneously track the evolution of  
1458 genotypes and phenotypes, so did not conclude that the associated  $\mathbf{G}$ -matrix is necessarily singular or that the devel-  
1459 opmental matrix affects evolutionary equilibria. Wagner's (1984, 1989) models have been used to devise models of  
1460 constrained adaptation in a fitness landscape, borrowing ideas from computer science (Altenberg, 1995, his Fig. 2).  
1461 This and other models (Houle 1991, his Fig. 2 and Kirkpatrick and Lofsvold 1992, their Fig. 5) have suggested how  
1462 constrained evolutionary dynamics would proceed although they have lacked a mechanistic theory of breeding value  
1463 and thus of  $\mathbf{G}$  and its evolutionary dynamics. Other models borrowing ideas from computer science have found that  
1464 epistasis can cause the evolutionary dynamics to take an exponentially long time to reach fitness peaks (Kaznatcheev,  
1465 2019). Our mechanistic treatment of genetic covariation finds that as the  $\mathbf{H}$ -matrix in geno-phenotype space has at  
1466 least as many zero eigenvalues as there are lifetime phenotypes (i.e.,  $N_a N_p$ ), even if there were infinite time, the  
1467 population does not necessarily reach a fitness peak in geno-phenotype space. However, the population eventually  
1468 reaches a fitness peak in genotype space if there are no absolute mutational constraints after the landscape is modified  
1469 by the interaction of the total effects of the genotype on phenotype and direct phenotypic selection and by the total  
1470 niche-constructed effects of the genotype on fitness.

1471 We find that total genotypic selection provides more information regarding selection response than direct direc-  
1472 tional selection or other forms of total selection. We show that evolutionary equilibria occur when total genotypic  
1473 selection vanishes if there are no absolute mutational constraints and no exogenous plastic response. Direct selection  
1474 or total selection on the phenotype need not vanish at evolutionary equilibria, even if there are no absolute mutational  
1475 constraints and no exogenous plastic response. As total genotypic selection depends on development rather than ex-  
1476 clusively on (unconstrained) selection, and as development determines the admissible evolutionary trajectory along  
1477 which developmental and environmental constraints are satisfied, our findings show that development has a major



evolutionary role by sharing responsibility with selection for defining evolutionary equilibria and for determining the admissible evolutionary path. Future work should assess to what extent these conclusions depend on our assumptions, particularly that of deterministic development.

Total selection gradients correspond to quantities that have received various names. Such gradients correspond to Caswell's (1982, 2001) "total derivative of fitness" (denoted by him as  $d\lambda$ ), Charlesworth's (1994) "total differential" (of the population's growth rate, denoted by him as  $dr$ ), van Tienderen's (1995) "integrated sensitivity" (of the population's growth rate, denoted by him as IS), and Morrissey's (2014, 2015) "extended selection gradient" (denoted by him as  $\eta$ ). Total selection gradients measure total directional selection, so in our framework they take into account the downstream developmental effects of a trait on fitness. In contrast, Lande's (1979) selection gradients measure direct directional selection, so in our framework's terms they do not consider the developmentally immediate total effects of a trait on fitness nor the downstream developmental effects of a trait on fitness. We obtained compact expressions for total selection gradients as linear transformations of direct selection gradients, arising from the chain rule in matrix calculus notation (Layer 4, Eq. 20), analogously to previous expressions in terms of vital rates (Caswell, 2001, Eq. 9.38). Our mechanistic approach to total selection recovers the regression approach of Morrissey (2014) who defined the extended selection gradient as  $\eta = \Phi\beta$ , where  $\beta$  is Lande's selection gradient and  $\Phi$  is the matrix of total effects of all traits on themselves (computed as regression coefficients between variables related by a path diagram rather than as total derivatives, which entails material differences with our approach as explained above). Morrissey (2014) used an equation for the total-effect matrix  $\Phi$  (his Eq. 2) from path analysis (Greene, 1977, p. 380), which has the form of our matrices describing developmental feedback of the phenotype and the geno-phenotype ( $dx^T/dx|_{y=\bar{y}}$  and  $dz^T/dz|_{y=\bar{y}}$ ; Layer 4, Eq. 1 and Layer 4, Eq. 9). Thus, interpreting Morrissey's (2014)  $\Phi$  as our  $dx^T/dx|_{y=\bar{y}}$  (resp.  $dz^T/dz|_{y=\bar{y}}$ ) and  $\beta$  as our  $\delta w/\delta x|_{y=\bar{y}}$  (resp.  $\delta w/\delta z|_{y=\bar{y}}$ ) (i.e., Lande's selection gradient of the phenotype or the geno-phenotype if environmental traits are not explicitly included in the analysis), then Layer 4, Eq. 21 (resp. Layer 4, Eq. 24) shows that the extended selection gradient  $\eta = \Phi\beta$  corresponds to the total selection gradient of the phenotype  $dw/dx|_{y=\bar{y}}$  (resp. of the geno-phenotype  $dw/dz|_{y=\bar{y}}$ ). We did not show that  $dm^T/dm|_{y=\bar{y}}$  has the form of the equation for  $\Phi$  provided by Morrissey (2014) (his Eq. 2), but it might indeed hold. If we interpret  $\Phi$  as our  $dm^T/dm|_{y=\bar{y}}$  and  $\beta$  as our  $\partial w/\partial m|_{y=\bar{y}}$  (i.e., Lande's selection gradient of the geno-envo-phenotype thus explicitly including environmental traits in the analysis), then Layer 4, Eq. 25 shows that the extended selection gradient  $\eta = \Phi\beta$  corresponds to the total selection gradient of the geno-envo-phenotype  $dw/dm|_{y=\bar{y}}$ .

Not all total selection gradients provide a relatively complete description of the selection response. We show in Appendix H (Eq. H4) and Appendix J (Eq. J4) that the selection response of the geno-phenotype or the geno-envo-phenotype can respectively be written in terms of the total selection gradients of the geno-phenotype  $dw/dz|_{y=\bar{y}}$  or the geno-envo-phenotype  $dw/dm|_{y=\bar{y}}$ , but such total selection gradients are insufficient to predict evolutionary equilibria because they are premultiplied by a singular socio-genetic cross-covariance matrix. Also, the selection response of the phenotype can be written in terms of the total selection gradient of the phenotype  $dw/dx|_{y=\bar{y}}$ , but this expression for the selection response has an additional term involving the total immediate selection gradient of the genotype

1513  $\delta w / \delta \mathbf{y} |_{\mathbf{y}=\bar{\mathbf{y}}}$ , so the total selection gradient of the phenotype is insufficient to predict evolutionary equilibria (even more  
1514 considering that following the evolutionary dynamics of the phenotype alone is generally dynamically insufficient).  
1515 In contrast, we have shown that the total selection gradient of the genotype  $dw/d\mathbf{y} |_{\mathbf{y}=\bar{\mathbf{y}}}$  predicts evolutionary equilibria  
1516 if there are no absolute mutational constraints and no exogenous plastic response. Thus, out of all total selection gra-  
1517 dients considered, only total genotypic selection provides a relatively complete description of the selection response.  
1518 Morrissey (2015) considers that the total selection gradient of the genotype (his “inputs”) and of the phenotype (his  
1519 “traits”) would be equal, but the last line of Layer 4, Eq. 22 shows that the total selection gradients of the phenotype  
1520 and genotype are different in general, particularly due to direct genotypic selection and the total effects of genotype  
1521 on phenotype.

1522 Our results allow for the modelling of evo-devo dynamics in a wide array of settings. First, developmental and  
1523 environmental constraints (Layer 7, Eq. 1b and Layer 7, Eq. 1c) can mechanistically describe development, gene-  
1524 gene interaction, and gene-environment interaction, while allowing for arbitrary non-linearities and evolution of the  
1525 developmental map. Several previous approaches have modelled gene-gene interaction, such as by considering multi-  
1526 plicative gene effects, but general frameworks mechanistically linking gene-gene interaction, gene-environment inter-  
1527 action, developmental dynamics, and evolutionary dynamics have previously remained elusive (Rice, 1990; Hansen  
1528 and Wagner, 2001; Rice, 2002; Hermisson et al., 2003; Carter et al., 2005; Rice, 2011). A historically dominant  
1529 yet debated view is that gene-gene interaction has minor evolutionary effects as phenotypic evolution depends on  
1530 additive rather than epistatic effects (under normality or to a first-order of approximation), so epistasis would act by  
1531 influencing a seemingly effectively non-singular  $\mathbf{G}$  (Hansen, 2013; Nelson et al., 2013; Paixão and Barton, 2016; Bar-  
1532 ton, 2017). Our finding that the constraining matrix  $\mathbf{H}$  is necessarily singular in a dynamically sufficient phenotypic  
1533 adaptive topography entails that evolutionary equilibria depend on development and consequently on gene-gene and  
1534 gene-environment interactions. Hence, gene-gene and gene-environment interaction can generally have strong and  
1535 permanent evolutionary effects in the sense of defining together with selection what the evolutionary equilibria are  
1536 (e.g., via developmental feedbacks described by  $d\mathbf{x}^T/d\mathbf{x} |_{\mathbf{y}=\bar{\mathbf{y}}}$ ) even by altering the  $\mathbf{H}$ -matrix alone. This contrasts with  
1537 a non-singular constraining matrix whereby evolutionary equilibria are pre-determined by selection.

1538 Second, our results allow for the study of long-term evolution of the  $\mathbf{H}$ -matrix as an emergent property of the  
1539 evolution of the genotype, phenotype, and environment (i.e., the geno-envo-phenotype). In contrast, it has been  
1540 traditional to study short-term evolution of  $\mathbf{G}$  by treating it as another dynamic variable under constant allele frequency  
1541 (Bulmer, 1971; Lande, 1979; Bulmer, 1980; Lande, 1980; Lande and Arnold, 1983; Barton and Turelli, 1987; Turelli,  
1542 1988; Gavrillets and Hastings, 1994; Carter et al., 2005; Débarre et al., 2014). Third, our results allow for the study  
1543 of the effects of developmental bias, biased genetic variation, and modularity (Wagner, 1996; Pavlicev and Hansen,  
1544 2011; Pavlicev et al., 2011; Wagner and Zhang, 2011; Pavlicev and Wagner, 2012; Watson et al., 2013). While we  
1545 have assumed that mutation is unbiased for the genotype, our equations allow for the developmental map to lead  
1546 to biases in genetic variation for the phenotype. This may lead to modular effects of mutations, whereby altering a  
1547 genotypic trait at a given age tends to affect some phenotypes but not others.

Fourth, our equations facilitate the study of life-history models with dynamic constraints. Life-history models with dynamic constraints have typically assumed evolutionary equilibrium, so they are analysed using dynamic optimization techniques such as dynamic programming and optimal control (e.g., León, 1976; Iwasa and Roughgarden, 1984; Houston and McNamara, 1999; González-Forero et al., 2017; Avila et al., 2021). In recent years, mathematically modelling the evolutionary dynamics of life-history models with dynamic constraints, that is, of what we call the evo-devo dynamics, has been made possible with the canonical equation of adaptive dynamics for function-valued traits (Dieckmann et al., 2006; Parvinen et al., 2013; Metz et al., 2016). However, such an approach poses substantial mathematical challenges by requiring derivation of functional derivatives and solution of associated differential equations for costate variables (Parvinen et al., 2013; Metz et al., 2016; Avila et al., 2021). By using discrete age, we have obtained closed-form equations that facilitate modelling the evo-devo dynamics. By doing so, our framework yields an alternative method to dynamic optimization to analyse a broad class of life-history models with dynamic constraints (see Example).

Fifth, our framework allows for the modelling of the evo-devo dynamics of pattern formation by allowing the implementation of reaction-diffusion equations in *discrete space* in the developmental map, once equations are suitably written (e.g., Eq. 6.1 of Turing, 1952; Tomlin and Axelrod, 2007; Supplementary Information section S6). Thus, the framework may allow one to implement and analyse the evo-devo dynamics of existing detailed models of the development of morphology (e.g., Salazar-Ciudad and Jernvall, 2010; Salazar-Ciudad and Marín-Riera, 2013), to the extent that developmental maps can be written in the form of Eq. (1). Sixth, our framework also allows for the mechanistic modelling of adaptive plasticity, for instance, by implementing reinforcement learning or supervised learning in the developmental map (Sutton and Barto, 2018; Paenke et al., 2007). In practice, to use our framework to model the evo-devo dynamics, it may often be simpler to compute the developmental dynamics of the phenotype and the evolutionary dynamics of the genotype (as in Fig. 5), rather than the evolutionary dynamics of the geno-phenotype or geno-envo-phenotype. When this is the case, after solving for the evo-devo dynamics, one can then compute the matrices composing the evolutionary dynamics of the geno-phenotype and geno-envo-phenotype to gain further understanding of the evolutionary factors at play, including the evolution of the  $\mathbf{H}$ -matrix (as in Fig. 6).

By allowing development to be social, our framework allows for a mechanistic description of extra-genetic inheritance and indirect genetic effects. Extra-genetic inheritance can be described since the phenotype at a given age can be an identical or modified copy of the geno-phenotype of social partners. Thus, social development allows for the modelling of social learning (Sutton and Barto, 2018; Paenke et al., 2007) and epigenetic inheritance (Jablonka et al., 1992; Slatkin, 2009; Day and Bonduriansky, 2011). However, in our framework extra-genetic inheritance is insufficient to yield phenotypic evolution that is independent of both genetic evolution and exogenous plastic change (e.g., in the framework, there cannot be cultural evolution without genetic evolution or exogenous environmental change). This is seen by setting mutational covariation and exogenous environmental change to zero (i.e.,  $\mathbf{H}_y = \mathbf{0}$  and  $\partial\bar{\epsilon}/\partial\tau = \mathbf{0}$ ), which eliminates evolutionary change (i.e.,  $d\bar{\mathbf{m}}/d\tau = \mathbf{0}$ ). The reason is that although there is extra-genetic *inheritance* in our framework, there is no extra-genetic *variation* because both development is deterministic

1583 and we use adaptive dynamics assumptions: without mutation, every SDS resident develops the same phenotype as  
1584 every other resident. Extensions to consider stochastic development might enable extra-genetic variation and possibly  
1585 phenotypic evolution that is independent of genetic and exogenously plastic evolution. Yet, we have only considered  
1586 social interactions among non-relatives, so our framework at present only allows for social learning or epigenetic  
1587 inheritance from non-relatives.

1588 Our framework can mechanistically describe indirect genetic effects via social development because the developed  
1589 phenotype can be mechanistically influenced by the genotype or phenotype of social partners. Indirect genetic effects  
1590 mean that a phenotype may be partly or completely caused by genes located in another individual (Moore et al., 1997).  
1591 Indirect genetic effect approaches model the phenotype considering a linear regression of individual's phenotype on  
1592 social partner's phenotype (Kirkpatrick and Lande, 1989; Moore et al., 1997; Townley and Ezard, 2013), whereas  
1593 our approach constructs individual's phenotype from development depending on social partners' genotype and phe-  
1594 notypes. We found that social development generates social feedback (described by  $s\mathbf{x}/s\bar{\mathbf{x}}^T|_{y=\bar{y}}$ , Eq. Layer 5, Eq. 1),  
1595 which closely though not entirely corresponds to social feedback found in the indirect genetic effects literature (Moore  
1596 et al., 1997, Eq. 19b and subsequent text). The social feedback we obtain depends on total social developmental bias  
1597 from the phenotype ( $d\mathbf{x}/d\bar{\mathbf{x}}^T|_{y=\bar{y}}$ , Eq. Layer 4, Eq. 5); analogously, social feedback in the indirect genetic effects liter-  
1598 ature depends on the matrix of interaction coefficients ( $\Psi$ ) which contains the regression coefficients of phenotype on  
1599 social partner's phenotype. Social development leads to a generalization of mechanistic additive genetic covariance  
1600 matrices  $\mathbf{H} = \text{cov}[\mathbf{b}, \mathbf{b}]$  into mechanistic additive socio-genetic cross-covariance matrices  $\mathbf{L} = \text{cov}[\mathbf{b}^s, \mathbf{b}]$ ; similarly,  
1601 indirect genetic effects involve a generalization of the  $\mathbf{G}$ -matrix, which includes  $\mathbf{C}_{\mathbf{a}\mathbf{x}} = \text{cov}[\mathbf{a}, \mathbf{x}]$ , namely the cross-  
1602 covariance matrix between multivariate breeding value and phenotype (Kirkpatrick and Lande, 1989; Moore et al.,  
1603 1997; Townley and Ezard, 2013). However, there are differences between our results and those in the indirect genetic  
1604 effects literature. First, social feedback (in the sense of inverse matrices involving  $\Psi$ ) appears twice in the evolution-  
1605 ary dynamics under indirect genetic effects (see Eqs. 20 and 21 of Moore et al. 1997) while it only appears once in  
1606 our evolutionary dynamics equations through  $s\mathbf{x}/s\bar{\mathbf{x}}^T|_{y=\bar{y}}$  (Eq. Layer 6, Eq. 10). This difference may stem from the  
1607 assumption in the indirect genetic effects literature that social interactions are reciprocal, while we assume that they  
1608 are asymmetric in the sense that, since mutants are rare, mutant's development depends on residents but resident's  
1609 development does not depend on mutants (we thank J. W. McGlothlin for pointing this out). Second, our  $\mathbf{L}$  matrices  
1610 make the evolutionary dynamics equations depend on total social developmental bias from the genotype ( $d\mathbf{x}/d\bar{\mathbf{y}}^T|_{y=\bar{y}}$ ,  
1611 Eq. Layer 5, Eq. 2a) in a non-feedback manner (specifically, not in an inverse matrix) but this type of dependence  
1612 does not occur in the evolutionary dynamics under indirect genetic effects (Eqs. 20 and 21 of Moore et al. 1997). This  
1613 difference might stem from the absence of explicit tracking of allele frequency in the indirect genetic effects litera-  
1614 ture in keeping with the tradition of quantitative genetics, whereas we explicitly track the genotype. Third, "social  
1615 selection" (i.e.,  $\partial w/\partial \bar{\mathbf{z}}$ ) plays no role in our results consistently with our assumption of a well-mixed population, but  
1616 social selection plays an important role in the indirect genetic effects literature even if relatedness is zero (McGlothlin  
1617 et al., 2010, e.g., setting  $r = 0$  in their Eq. 10 still leaves an effect of social selection on selection response due to

“phenotypic” kin selection). 1618

Our framework offers formalizations to the notions of developmental constraints and developmental bias. The two 1619 notions have been often interpreted as equivalents (e.g., Brakefield, 2006), or with a distinction such that constraints 1620 entail a negative, prohibiting effect while bias entails a positive, directive effect of development on the generation of 1621 phenotypic variation (Uller et al., 2018; Salazar-Ciudad, 2021). We defined developmental constraint as the condition 1622 that the phenotype at a given age is a function of the individual’s condition at their immediately previous age, which 1623 both prohibits certain values of the phenotype and has a “directive” effect on the generation of phenotypic variation. 1624 We offered quantification of developmental bias in terms of the slope of the phenotype with respect to itself at subse- 1625 quent ages. No bias would lead to zero slopes thus to identity matrices (e.g.,  $\partial \mathbf{x}^T / \partial \mathbf{x}|_{y=\bar{y}} = \mathbf{I}$  and  $d\mathbf{x}^T / d\mathbf{x}|_{y=\bar{y}} = \mathbf{I}$ ) and 1626 deviations from the identity matrix would constitute bias. 1627

Our results clarify the role of several developmental factors previously suggested to be evolutionarily important. 1628 We have arranged the evo-devo process in a layered structure, where a given layer is formed by components of 1629 layers below (Fig. 4). This layered structure helps see that several developmental factors previously suggested to 1630 have important evolutionary effects (Laland et al., 2014) but with little clear connection (Welch, 2017) can be viewed 1631 as basic elements of the evolutionary process. Direct-effect matrices (Layer 2) are basic in that they form all the 1632 components of the evolutionary dynamics (Layer 7) except mutational covariation and exogenous environmental 1633 change. Direct-effect matrices quantify direct (i) directional selection, (ii) developmental bias, (iii) niche construction, 1634 (iv) social developmental bias (e.g., extra-genetic inheritance and indirect genetic effects; Moore et al. 1997), (v) social 1635 niche construction, (vi) environmental sensitivity of selection (Chevin et al., 2010), and (vii) phenotypic plasticity. 1636 These factors variously affect selection and development, thus affecting evolutionary equilibria and the admissible 1637 evolutionary trajectory. 1638

Our approach uses discrete rather than continuous age, which substantially simplifies the mathematics. This treat- 1639 ment allows for the derivation of closed-form expressions for what can otherwise be a difficult mathematical challenge 1640 if age is continuous (Kirkpatrick and Heckman, 1989; Dieckmann et al., 2006; Parvinen et al., 2013; Metz et al., 2016; 1641 Avila et al., 2021). For instance, costate variables are key in dynamic optimization as used in life-history models 1642 (Gadgil and Bossert, 1970; León, 1976; Schaffer, 1983; Stearns, 1992; Roff, 1992; Kozłowski and Teriokhin, 1999; 1643 Sydsæter et al., 2008), but general closed-form formulas for costate variables were previously unavailable and their 1644 calculation often limits the analysis of such models. In Appendix K, we show that our results recover the key elements 1645 of Pontryagin’s maximum principle, which is the central tool of optimal control theory to solve dynamic optimization 1646 problems (Sydsæter et al., 2008). Under the assumption that there are no environmental traits (hence, no exogenous 1647 plastic response), in Appendix K, we show that an admissible locally stable evolutionary equilibrium solves a local, 1648 dynamic optimization problem of finding a genotype that both “totally” maximises a mutant’s lifetime reproductive 1649 success  $R_0$  and “directly” maximises the Hamiltonian of Pontryagin’s maximum principle. We show that this Hamilto- 1650 nian depends on costate variables that are proportional to the total selection gradient of the phenotype at evolutionary 1651 equilibrium (Eq. K3), and that the costate variables satisfy the costate equations of Pontryagin’s maximum principle. 1652

1653 Thus, our approach offers an alternative method to optimal control theory to find admissible evolutionary equilibria  
1654 for the broad class of models considered here. By exploiting the discretization of age, we have obtained various for-  
1655 mulas that can be computed directly for the total selection gradient of the phenotype (Layer 4, Eq. 21), so for costate  
1656 variables, and of their relationship to total genotypic selection (fifth line of Layer 4, Eq. 22), thus facilitating analytic  
1657 and numerical treatment of life-history models with dynamic constraints. Although discretization of age may induce  
1658 numerical imprecision relative to continuous age (Kirkpatrick and Heckman, 1989), numerical and empirical treat-  
1659 ment of continuous age typically involves discretization at one point or another, with continuous curves often achieved  
1660 by interpolation (e.g., Kirkpatrick et al., 1990). Numerical precision with discrete age may be increased by reducing  
1661 the age bin size (e.g., to represent months or days rather than years; Caswell, 2001), potentially at a computational  
1662 cost.

1663 By simplifying the mathematics, our approach yields insight that may be otherwise challenging to gain. Life-  
1664 history models with dynamic constraints generally find that costate variables are non-zero under optimal controls  
1665 (Gadgil and Bossert, 1970; Taylor et al., 1974; León, 1976; Schaffer, 1983; Houston et al., 1988; Houston and McNa-  
1666 mara, 1999; Sydsæter et al., 2008). This means that there is persistent total selection on the phenotype at evolutionary  
1667 equilibrium. Our findings show that this is to be expected for various reasons including absolute mutational constraints  
1668 (i.e., active path constraints so controls remain between zero and one, as in the Example), the occurrence of direct  
1669 genotypic selection, and there being more state variables than control variables (in which case  $\delta\mathbf{x}^T/\delta\mathbf{y}$  is singular as  
1670 it has more rows than columns, even after removing initial states and final controls from the analysis; Eq. C10) (fifth  
1671 line of Layer 4, Eq. 22). Thus, zero total genotypic selection at equilibrium may involve persistent total phenotypic  
1672 selection. Moreover, life-history models with explicit developmental constraints have found that their predictions can  
1673 be substantially different from those found without explicit developmental constraints. In particular, without develop-  
1674 mental constraints, the outcome of parent-offspring conflict over sex allocation has been found to be an intermediate  
1675 between the outcomes preferred by mother and offspring (Reuter and Keller, 2001), whereas with developmental con-  
1676 straints, the outcome has been found to be that preferred by the mother (Avila et al., 2019). Our results show that  
1677 changing the particular form of the developmental map may induce substantial changes in predictions by influencing  
1678 total genotypic selection and the admissible evolutionary equilibria. In other words, the developmental map used  
1679 alters the evolutionary outcome because it modulates absolute socio-genetic constraints (i.e., the  $\mathbf{H}$  or  $\mathbf{L}$  matrices in  
1680 geno-phenotype space).

1681 We have obtained a term that we refer to as exogenous plastic response, which is the plastic response to exogenous  
1682 environmental change over an evolutionary time step (Layer 7, Eq. 3). An analogous term occurs in previous equations  
1683 (Eq. A3 of Chevin et al. 2010). Additionally, our framework considers *endogenous* plastic response due to niche  
1684 construction (i.e., endogenous environmental change), which affects both the selection response and the exogenous  
1685 plastic response. Exogenous plastic response affects the evolutionary dynamics even though it is not ultimately caused  
1686 by change in the resident genotype (or in gene frequency), but by exogenous environmental change. In particular,  
1687 exogenous plastic response allows for a straightforward form of “plasticity-first” evolution (Waddington, 1942, 1961;

West-Eberhard, 2003) as follows. At an evolutionary equilibrium where exogenous plastic response is absent, the introduction of exogenous plastic response generally changes socio-genetic covariation or directional selection at a subsequent evolutionary time, thereby inducing selection response. This constitutes a simple form of plasticity-first evolution, whereby plastic change precedes genetic change, although the plastic change may not be adaptive and the induced genetic change may have a different direction to that of the plastic change.

Empirical estimation of the developmental map may be facilitated by it defining a dynamic equation. Whereas the developmental map defines a dynamic equation to construct the phenotype, the genotype-phenotype map corresponds to the solution of such dynamic equation. It is often impractical or impossible to write the solution of a dynamic equation, even if the dynamic equation can be written in practice. Accordingly, it may often prove impractical to empirically estimate the genotype-phenotype map, whereas it may be more tractable to empirically infer developmental maps. Inference of developmental maps from empirical data can be pursued via the growing number of methods to infer dynamic equations from data (Schmidt and Lipson, 2009; Brunton et al., 2016; Ghadami and Epureanu, 2022, and papers in the special issue).

To conclude, we have formulated a framework that synthesizes developmental and evolutionary dynamics yielding a theory of long-term phenotypic evolution on an adaptive topography by mechanistically describing the long-term evolution of genetic covariation. This framework shows that development has major evolutionary effects by showing that selection and development jointly define the evolutionary outcomes if mutation is not absolutely constrained and exogenous plastic response is absent, rather than the outcomes being defined only by selection. Our results provide a tool to chart major territory on how development affects evolution.

## 7. Acknowledgements

I thank Andy Gardner for extensive support throughout this project, by discussing, reading, and commenting on the many drafts, and offering interpretation, advice, and funding. I thank K.N. Laland, R. Lande, L.C. Mikula, A.J. Moore, and M.B. Morrissey for comments on previous versions of the manuscript, and J.W. McGlothlin, J.A.J. Metz, I. Salazar-Ciudad, and D.M. Shuker for discussion. I thank T.F. Hansen, M. Pavlicev, S.J. Schreiber, and two anonymous reviewers for very helpful criticism. I thank M.B. Morrissey for discussion and explanation of his work. This work was funded by an ERC Consolidator Grant to A. Gardner (grant no. 771387), by the School of Biology of the University of St Andrews, and by a John Templeton Foundation grant to K.N. Laland and T. Uller (grant ID 60501).

1716 **Appendix A. Matrix calculus notation**

1717 Following Caswell (2019), for vectors  $\mathbf{a} \in \mathbb{R}^{n \times 1}$  and  $\mathbf{b} \in \mathbb{R}^{m \times 1}$ , we denote

$$\frac{\partial \mathbf{a}}{\partial \mathbf{b}^\top} = \begin{pmatrix} \frac{\partial a_1}{\partial b_1} & \cdots & \frac{\partial a_1}{\partial b_m} \\ \vdots & \ddots & \vdots \\ \frac{\partial a_n}{\partial b_1} & \cdots & \frac{\partial a_n}{\partial b_m} \end{pmatrix} \in \mathbb{R}^{n \times m},$$

1718 so  $(\partial \mathbf{a} / \partial \mathbf{b}^\top)^\top = \partial \mathbf{a}^\top / \partial \mathbf{b}$ . The same notation applies with total derivatives.

1719 **Appendix B. Total selection gradient of the phenotype**

1720 Here we derive the total selection gradient of the phenotype  $d\lambda/d\mathbf{x}|_{\mathbf{y}=\bar{\mathbf{y}}}$ , which is part of and simpler to derive than  
1721 the total selection gradient of the genotype  $d\lambda/d\mathbf{y}|_{\mathbf{y}=\bar{\mathbf{y}}}$ .

1722 *Appendix B.1. Total selection gradient of the phenotype in terms of direct fitness effects*

1723 We start by considering the total selection gradient of the  $i$ -th phenotype at age  $a$ . By this, we mean the total  
1724 selection gradient of a perturbation of  $x_{ia}$  taken as initial condition of the recurrence equation (1) when applied at the  
1725 ages  $\{a, \dots, n\}$ . Consequently, a perturbation in a phenotype at a given age does not affect phenotypes at earlier ages,  
1726 in short, due to *the arrow of developmental time*. By letting  $\zeta$  in Eq. (S19) be  $x_{ia}$ , we have

$$\left. \frac{d\lambda}{dx_{ia}} \right|_{\mathbf{y}=\bar{\mathbf{y}}} = \left. \frac{dw}{dx_{ia}} \right|_{\mathbf{y}=\bar{\mathbf{y}}} = \sum_{j=1}^{N_a} \left. \frac{dw_j}{dx_{ia}} \right|_{\mathbf{y}=\bar{\mathbf{y}}}. \quad (\text{B1})$$

1727 Note that the total derivatives of a mutant's relative fitness at age  $j$  in Eq. (B1) are with respect to the individ-  
1728 ual's phenotype at possibly another age  $a$ . From Eq. (S17), we have that a mutant's relative fitness at age  $j$ ,  
1729  $w_j(\mathbf{z}_j, \mathbf{h}_j(\mathbf{z}_j, \bar{\mathbf{z}}, \tau), \bar{\mathbf{m}})$ , depends on the individual's phenotype at the current age (recall  $\mathbf{z}_j = (\mathbf{x}_j; \mathbf{y}_j)$ ), but from the  
1730 developmental constraint (1) the phenotype at a given age depends on the phenotype at previous ages. We must then  
1731 calculate the total derivatives of fitness in Eq. (B1) in terms of direct (i.e., partial) derivatives, thus separating the  
1732 effects of phenotypes at the current age from those of phenotypes at other ages.

1733 To do this, we start by applying the chain rule, and since we assume that genotypic traits are developmentally  
1734 independent (hence, they do not depend on the phenotype, so  $d\mathbf{y}_j/dx_{ia} = \mathbf{0}$  for all  $i \in \{1, \dots, N_p\}$  and all  $a, j \in$   
1735  $\{1, \dots, N_a\}$ ), we obtain

$$\left. \frac{dw_j}{dx_{ia}} \right|_{\mathbf{y}=\bar{\mathbf{y}}} = \left( \sum_{k=1}^{N_p} \frac{\partial w_j}{\partial x_{kj}} \frac{dx_{kj}}{dx_{ia}} + \sum_{k=1}^{N_p} \sum_{r=1}^{N_c} \frac{\partial w_j}{\partial \epsilon_{rj}} \frac{\partial \epsilon_{rj}}{\partial x_{kj}} \frac{dx_{kj}}{dx_{ia}} \right) \Bigg|_{\mathbf{y}=\bar{\mathbf{y}}}.$$

1736 Applying matrix calculus notation (Appendix A), this is

$$\left. \frac{dw_j}{dx_{ia}} \right|_{\mathbf{y}=\bar{\mathbf{y}}} = \left( \frac{d\mathbf{x}_j^\top}{dx_{ia}} \frac{\partial w_j}{\partial \mathbf{x}_j} + \sum_{k=1}^{N_p} \frac{\partial \boldsymbol{\epsilon}_j^\top}{\partial x_{kj}} \frac{\partial w_j}{\partial \boldsymbol{\epsilon}_j} \frac{dx_{kj}}{dx_{ia}} \right) \Bigg|_{\mathbf{y}=\bar{\mathbf{y}}}.$$



Applying matrix calculus notation again yields

1737

$$\left. \frac{dw_j}{dx_{ia}} \right|_{y=\bar{y}} = \left( \frac{d\mathbf{x}_j^T}{dx_{ia}} \frac{\partial w_j}{\partial \mathbf{x}_j} + \frac{d\mathbf{x}_j^T}{dx_{ia}} \frac{\partial \boldsymbol{\epsilon}_j^T}{\partial \mathbf{x}_j} \frac{\partial w_j}{\partial \boldsymbol{\epsilon}_j} \right) \Big|_{y=\bar{y}}.$$

Factorizing, we have

1738

$$\left. \frac{dw_j}{dx_{ia}} \right|_{y=\bar{y}} = \left[ \frac{d\mathbf{x}_j^T}{dx_{ia}} \left( \frac{\partial w_j}{\partial \mathbf{x}_j} + \frac{\partial \boldsymbol{\epsilon}_j^T}{\partial \mathbf{x}_j} \frac{\partial w_j}{\partial \boldsymbol{\epsilon}_j} \right) \right] \Big|_{y=\bar{y}}. \quad (\text{B2})$$

Eq. (B2) now contains only partial derivatives of age-specific fitness.

1739

We now write Eq. (B2) in terms of partial derivatives of lifetime fitness. Consider the *direct selection gradient of the phenotype at age  $j$*  defined as

1740

1741

$$\left. \frac{\partial w}{\partial \mathbf{x}_j} \right|_{y=\bar{y}} \equiv \left( \frac{\partial w}{\partial x_{1j}}, \dots, \frac{\partial w}{\partial x_{N_p j}} \right)^T \Big|_{y=\bar{y}} \in \mathbb{R}^{N_p \times 1}.$$

Such selection gradient of the phenotype at age  $j$  forms the selection gradient of the phenotype at all ages

1742

(Layer 2, Eq. 1). Similarly, the *direct selection gradient of the environment at age  $j$*  is

1743

$$\left. \frac{\partial w}{\partial \boldsymbol{\epsilon}_j} \right|_{y=\bar{y}} \equiv \left( \frac{\partial w}{\partial \epsilon_{1j}}, \dots, \frac{\partial w}{\partial \epsilon_{N_e j}} \right)^T \Big|_{y=\bar{y}} \in \mathbb{R}^{N_e \times 1},$$

and the matrix of *direct effects of a mutant's phenotype at age  $j$  on her environment at age  $j$*  is

1744

$$\left. \frac{\partial \boldsymbol{\epsilon}_j^T}{\partial \mathbf{x}_j} \right|_{y=\bar{y}} \equiv \begin{pmatrix} \frac{\partial \epsilon_{1j}}{\partial x_{1j}} & \dots & \frac{\partial \epsilon_{N_e j}}{\partial x_{1j}} \\ \vdots & \ddots & \vdots \\ \frac{\partial \epsilon_{1j}}{\partial x_{N_p j}} & \dots & \frac{\partial \epsilon_{N_e j}}{\partial x_{N_p j}} \end{pmatrix} \Big|_{y=\bar{y}} \in \mathbb{R}^{N_e \times N_p}.$$

From Eq. (S18),  $w$  only depends directly on  $\mathbf{x}_j$ ,  $\mathbf{y}_j$ , and  $\boldsymbol{\epsilon}_j$  through  $w_j$ . So,

1745

$$\frac{\partial w_j}{\partial \mathbf{x}_j} = \frac{\partial w}{\partial \mathbf{x}_j} \quad (\text{B3a})$$

$$\frac{\partial w_j}{\partial \mathbf{y}_j} = \frac{\partial w}{\partial \mathbf{y}_j} \quad (\text{B3b})$$

$$\frac{\partial w_j}{\partial \boldsymbol{\epsilon}_j} = \frac{\partial w}{\partial \boldsymbol{\epsilon}_j}, \quad (\text{B3c})$$

which substituted in Eq. (B2) yields

1746

$$\begin{aligned} \left. \frac{dw_j}{dx_{ia}} \right|_{y=\bar{y}} &= \left[ \frac{d\mathbf{x}_j^T}{dx_{ia}} \left( \frac{\partial w}{\partial \mathbf{x}_j} + \frac{\partial \boldsymbol{\epsilon}_j^T}{\partial \mathbf{x}_j} \frac{\partial w}{\partial \boldsymbol{\epsilon}_j} \right) \right] \Big|_{y=\bar{y}} \\ &= \left( \frac{d\mathbf{x}_j^T}{dx_{ia}} \delta \mathbf{x}_j \right) \Big|_{y=\bar{y}}, \end{aligned} \quad (\text{B4})$$

where the *total immediate selection gradient of the phenotype at age  $j$*  is

1747

$$\left. \frac{\delta w}{\delta \mathbf{x}_j} \right|_{y=\bar{y}} = \left( \frac{\partial w}{\partial \mathbf{x}_j} + \frac{\partial \boldsymbol{\epsilon}_j^T}{\partial \mathbf{x}_j} \frac{\partial w}{\partial \boldsymbol{\epsilon}_j} \right) \Big|_{y=\bar{y}} \in \mathbb{R}^{N_p \times 1}. \quad (\text{B5})$$

1748 Consider now the total immediate selection gradient of the phenotype at all ages. The block column vector of *total*  
 1749 *immediate effects of a mutant's phenotype on fitness* is

$$\frac{\delta w}{\delta \mathbf{x}} \Big|_{\mathbf{y}=\bar{\mathbf{y}}} \equiv \left( \frac{\delta w}{\delta \mathbf{x}_1}; \dots; \frac{\delta w}{\delta \mathbf{x}_{N_a}} \right) \Big|_{\mathbf{y}=\bar{\mathbf{y}}} \in \mathbb{R}^{N_a N_p \times 1}.$$

1750 Using Layer 2, Eq. 2d, we have that

$$\frac{\partial \boldsymbol{\epsilon}^\top}{\partial \mathbf{x}} \frac{\partial w}{\partial \boldsymbol{\epsilon}} = \left( \sum_{k=1}^{N_a} \frac{\partial \boldsymbol{\epsilon}_k^\top}{\partial \mathbf{x}_j} \frac{\partial w}{\partial \boldsymbol{\epsilon}_k} \right) = \left( \frac{\partial \boldsymbol{\epsilon}_j^\top}{\partial \mathbf{x}_j} \frac{\partial w}{\partial \boldsymbol{\epsilon}_j} \right) \quad (\text{B6})$$

1751 is a block column vector whose  $j$ -th entry equals the rightmost term in Eq. (B5). Thus, from (B5), Layer 2, Eq. 1, and  
 1752 (B6), it follows that the total immediate selection gradient of the phenotype is given by Layer 3, Eq. 1.

1753 Now, we write the total selection gradient of  $x_{ia}$  in terms of the total immediate selection gradient of the phenotype.  
 1754 Substituting Eq. (B4) in Eq. (B1) yields

$$\frac{dw}{dx_{ia}} \Big|_{\mathbf{y}=\bar{\mathbf{y}}} = \sum_{j=1}^{N_a} \left( \frac{d\mathbf{x}_j^\top}{dx_{ia}} \frac{\delta w}{\delta \mathbf{x}_j} \right) \Big|_{\mathbf{y}=\bar{\mathbf{y}}} = \left( \frac{d\mathbf{x}^\top}{dx_{ia}} \frac{\delta w}{\delta \mathbf{x}} \right) \Big|_{\mathbf{y}=\bar{\mathbf{y}}},$$

1755 where we use the block row vector

$$\frac{d\mathbf{x}^\top}{dx_{ia}} = \left( \frac{d\mathbf{x}_1^\top}{dx_{ia}}, \dots, \frac{d\mathbf{x}_{N_a}^\top}{dx_{ia}} \right) \in \mathbb{R}^{1 \times N_a N_p}.$$

1756 Therefore, the total selection gradient of all phenotypes across all ages is

$$\frac{dw}{d\mathbf{x}} \Big|_{\mathbf{y}=\bar{\mathbf{y}}} = \left( \frac{d\mathbf{x}^\top}{d\mathbf{x}} \frac{\delta w}{\delta \mathbf{x}} \right) \Big|_{\mathbf{y}=\bar{\mathbf{y}}} \in \mathbb{R}^{N_a N_p \times 1}, \quad (\text{B7})$$

1757 where the total immediate selection gradient of the phenotype is given by Layer 3, Eq. 1 and the block matrix of *total*  
 1758 *effects of a mutant's phenotype on her phenotype* is

$$\frac{d\mathbf{x}^\top}{d\mathbf{x}} \Big|_{\mathbf{y}=\bar{\mathbf{y}}} \equiv \begin{pmatrix} \frac{d\mathbf{x}_1^\top}{dx_{ia}} & \dots & \frac{d\mathbf{x}_{N_a}^\top}{dx_{ia}} \\ \frac{d\mathbf{x}_1^\top}{dx_{ia}} & \dots & \frac{d\mathbf{x}_{N_a}^\top}{dx_{ia}} \\ \vdots & \ddots & \vdots \\ \frac{d\mathbf{x}_1^\top}{dx_{ia}} & \dots & \frac{d\mathbf{x}_{N_a}^\top}{dx_{ia}} \\ \frac{d\mathbf{x}_{N_a}^\top}{dx_{ia}} & \dots & \frac{d\mathbf{x}_{N_a}^\top}{dx_{ia}} \end{pmatrix} \Big|_{\mathbf{y}=\bar{\mathbf{y}}} \in \mathbb{R}^{N_a N_p \times N_a N_p}.$$

1759 Using Layer 3, Eq. 1, expression (B7) is now in terms of partial derivatives of fitness, partial derivatives of the  
 1760 environment, and total effects of a mutant's phenotype on her phenotype,  $d\mathbf{x}^\top/d\mathbf{x}$ , which we now proceed to write in  
 1761 terms of partial derivatives only.

## 1762 Appendix B.2. Matrix of total effects of a mutant's phenotype on her phenotype

1763 From the developmental constraint (1) for the  $k$ -th phenotype at age  $j \in \{2, \dots, N_a\}$  we have that  $x_{kj} =$   
 1764  $g_{k,j-1}(\mathbf{z}_{j-1}, \mathbf{h}_{j-1}(\mathbf{z}_{j-1}, \bar{\mathbf{z}}, \tau), \bar{\mathbf{z}})$ , so using the chain rule and since genotypic traits are developmentally independent we  
 1765 obtain

$$\frac{dx_{kj}}{dx_{ia}} \Big|_{\mathbf{y}=\bar{\mathbf{y}}} = \left( \sum_{l=1}^{N_p} \frac{\partial g_{k,j-1}}{\partial x_{l,j-1}} \frac{dx_{l,j-1}}{dx_{ia}} \right)$$

$$+ \sum_{l=1}^{N_p} \sum_{r=1}^{N_e} \left. \frac{\partial g_{k,j-1}}{\partial \epsilon_{r,j-1}} \frac{\partial \epsilon_{r,j-1}}{\partial x_{l,j-1}} \frac{dx_{l,j-1}}{dx_{ia}} \right|_{y=\bar{y}}.$$

Applying matrix calculus notation (Appendix A), this is

1766

$$\frac{dx_{kj}}{dx_{ia}} \Big|_{y=\bar{y}} = \left( \frac{d\mathbf{x}_{j-1}^\top}{dx_{ia}} \frac{\partial g_{k,j-1}}{\partial \mathbf{x}_{j-1}} + \sum_{l=1}^{N_p} \frac{\partial \boldsymbol{\epsilon}_{j-1}^\top}{\partial x_{l,j-1}} \frac{\partial g_{k,j-1}}{\partial \boldsymbol{\epsilon}_{j-1}} \frac{dx_{l,j-1}}{dx_{ia}} \right) \Big|_{y=\bar{y}}.$$

Applying matrix calculus notation again yields

1767

$$\frac{dx_{kj}}{dx_{ia}} \Big|_{y=\bar{y}} = \left( \frac{d\mathbf{x}_{j-1}^\top}{dx_{ia}} \frac{\partial g_{k,j-1}}{\partial \mathbf{x}_{j-1}} + \frac{d\mathbf{x}_{j-1}^\top}{dx_{ia}} \frac{\partial \boldsymbol{\epsilon}_{j-1}^\top}{\partial \mathbf{x}_{j-1}} \frac{\partial g_{k,j-1}}{\partial \boldsymbol{\epsilon}_{j-1}} \right) \Big|_{y=\bar{y}}.$$

Factorizing, we have

1768

$$\frac{dx_{kj}}{dx_{ia}} \Big|_{y=\bar{y}} = \left[ \frac{d\mathbf{x}_{j-1}^\top}{dx_{ia}} \left( \frac{\partial g_{k,j-1}}{\partial \mathbf{x}_{j-1}} + \frac{\partial \boldsymbol{\epsilon}_{j-1}^\top}{\partial \mathbf{x}_{j-1}} \frac{\partial g_{k,j-1}}{\partial \boldsymbol{\epsilon}_{j-1}} \right) \right] \Big|_{y=\bar{y}}.$$

Rewriting  $g_{k,j-1}$  as  $x_{kj}$  yields

1769

$$\frac{dx_{kj}}{dx_{ia}} \Big|_{y=\bar{y}} = \left[ \frac{d\mathbf{x}_{j-1}^\top}{dx_{ia}} \left( \frac{\partial x_{kj}}{\partial \mathbf{x}_{j-1}} + \frac{\partial \boldsymbol{\epsilon}_{j-1}^\top}{\partial \mathbf{x}_{j-1}} \frac{\partial x_{kj}}{\partial \boldsymbol{\epsilon}_{j-1}} \right) \right] \Big|_{y=\bar{y}}.$$

Hence,

1770

$$\frac{d\mathbf{x}_j^\top}{dx_{ia}} \Big|_{y=\bar{y}} = \left[ \frac{d\mathbf{x}_{j-1}^\top}{dx_{ia}} \left( \frac{\partial \mathbf{x}_j^\top}{\partial \mathbf{x}_{j-1}} + \frac{\partial \boldsymbol{\epsilon}_{j-1}^\top}{\partial \mathbf{x}_{j-1}} \frac{\partial \mathbf{x}_j^\top}{\partial \boldsymbol{\epsilon}_{j-1}} \right) \right] \Big|_{y=\bar{y}}, \quad (\text{B8})$$

where we use the matrix of *direct effects of a mutant's phenotype at age  $j$  on her phenotype at age  $j+1$*

1771

$$\frac{\partial \mathbf{x}_{j+1}^\top}{\partial \mathbf{x}_j} \Big|_{y=\bar{y}} \equiv \left( \begin{array}{ccc} \frac{\partial x_{1,j+1}}{\partial x_{1j}} & \dots & \frac{\partial x_{N_p,j+1}}{\partial x_{1j}} \\ \vdots & \ddots & \vdots \\ \frac{\partial x_{1,j+1}}{\partial x_{N_p,j}} & \dots & \frac{\partial x_{N_p,j+1}}{\partial x_{N_p,j}} \end{array} \right) \Big|_{y=\bar{y}} \in \mathbb{R}^{N_p \times N_p},$$

and the matrix of *direct effects of a mutant's environment at age  $j$  on her phenotype at age  $j+1$*

1772

$$\frac{\partial \mathbf{x}_{j+1}^\top}{\partial \boldsymbol{\epsilon}_j} \Big|_{y=\bar{y}} \equiv \left( \begin{array}{ccc} \frac{\partial x_{1,j+1}}{\partial \epsilon_{1j}} & \dots & \frac{\partial x_{N_p,j+1}}{\partial \epsilon_{1j}} \\ \vdots & \ddots & \vdots \\ \frac{\partial x_{1,j+1}}{\partial \epsilon_{N_e,j}} & \dots & \frac{\partial x_{N_p,j+1}}{\partial \epsilon_{N_e,j}} \end{array} \right) \Big|_{y=\bar{y}} \in \mathbb{R}^{N_e \times N_p}.$$

We can write Eq. (B8) more succinctly as

1773

$$\frac{d\mathbf{x}_j^\top}{dx_{ia}} \Big|_{y=\bar{y}} = \left( \frac{d\mathbf{x}_{j-1}^\top}{dx_{ia}} \frac{\delta \mathbf{x}_j^\top}{\delta \mathbf{x}_{j-1}} \right) \Big|_{y=\bar{y}}, \quad (\text{B9})$$

1774 where we use the matrix of *total immediate effects of a mutant's phenotype at age  $j$  on her phenotype at age  $j + 1$*

$$\frac{\delta \mathbf{x}_{j+1}^T}{\delta \mathbf{x}_j} \Big|_{\mathbf{y}=\bar{\mathbf{y}}} = \left( \frac{\partial \mathbf{x}_{j+1}^T}{\partial \mathbf{x}_j} + \frac{\partial \boldsymbol{\epsilon}_j^T}{\partial \mathbf{x}_j} \frac{\partial \mathbf{x}_{j+1}^T}{\partial \boldsymbol{\epsilon}_j} \right) \Big|_{\mathbf{y}=\bar{\mathbf{y}}} \in \mathbb{R}^{N_p \times N_p}. \quad (\text{B10})$$

1775 The block matrix of *total immediate effects a mutant's phenotype on her phenotype* is

$$\begin{aligned} \frac{\delta \mathbf{x}^T}{\delta \mathbf{x}} \Big|_{\mathbf{y}=\bar{\mathbf{y}}} &\equiv \left( \begin{array}{ccc} \frac{\delta \mathbf{x}_1^T}{\delta \mathbf{x}_1} & \dots & \frac{\delta \mathbf{x}_{N_a}^T}{\delta \mathbf{x}_1} \\ \vdots & \ddots & \vdots \\ \frac{\delta \mathbf{x}_1^T}{\delta \mathbf{x}_{N_a}} & \dots & \frac{\delta \mathbf{x}_{N_a}^T}{\delta \mathbf{x}_{N_a}} \end{array} \right) \Big|_{\mathbf{y}=\bar{\mathbf{y}}} \\ &= \left( \begin{array}{ccccc} \mathbf{I} & \frac{\delta \mathbf{x}_2^T}{\delta \mathbf{x}_1} & \dots & \mathbf{0} & \mathbf{0} \\ \mathbf{0} & \mathbf{I} & \dots & \mathbf{0} & \mathbf{0} \\ \vdots & \vdots & \ddots & \vdots & \vdots \\ \mathbf{0} & \mathbf{0} & \dots & \mathbf{I} & \frac{\delta \mathbf{x}_{N_a}^T}{\delta \mathbf{x}_{N_a-1}} \\ \mathbf{0} & \mathbf{0} & \dots & \mathbf{0} & \mathbf{I} \end{array} \right) \Big|_{\mathbf{y}=\bar{\mathbf{y}}} \\ &\in \mathbb{R}^{N_a N_p \times N_a N_p}. \end{aligned} \quad (\text{B11})$$

1776 The equality (B11) follows because total immediate effects of a mutant's phenotype on her phenotype are only non-  
1777 zero at the next age (from the developmental constraint in Eq. 1) or when a variable is differentiated with respect to  
1778 itself. Using Layer 2, Eq. 2d and Layer 2, Eq. 2c, we have that

$$\frac{\partial \boldsymbol{\epsilon}^T}{\partial \mathbf{x}} \frac{\partial \mathbf{x}^T}{\partial \boldsymbol{\epsilon}} = \left( \sum_{k=1}^{N_a} \frac{\partial \boldsymbol{\epsilon}_k^T}{\partial \mathbf{x}_a} \frac{\partial \mathbf{x}_j^T}{\partial \boldsymbol{\epsilon}_k} \right) = \left( \begin{array}{cc} \frac{\partial \boldsymbol{\epsilon}_a^T}{\partial \mathbf{x}_a} \frac{\partial \mathbf{x}_j^T}{\partial \boldsymbol{\epsilon}_a} & \text{for } j = a + 1 \\ \mathbf{0} & \text{for } j \neq a + 1 \end{array} \right), \quad (\text{B12})$$

1779 which equals the rightmost term in Eq. (B10) for  $j = a + 1$ . Thus, from (B10), Layer 2, Eq. 2a, (B11), and (B12), it  
1780 follows that the block matrix of total immediate effects of a mutant's phenotype on her phenotype satisfies Layer 3,  
1781 Eq. 3.

1782 Eq. (B9) gives the matrix of total effects of the  $i$ -th phenotype of a mutant at age  $a$  on her phenotype at age  $j$ .  
1783 Then, it follows that the matrix of total effects of all the phenotypes of a mutant at age  $a$  on her phenotype at age  $j$  is

$$\frac{d\mathbf{x}_j^T}{d\mathbf{x}_a} \Big|_{\mathbf{y}=\bar{\mathbf{y}}} = \left( \frac{d\mathbf{x}_{j-1}^T}{d\mathbf{x}_a} \frac{\delta \mathbf{x}_j^T}{\delta \mathbf{x}_{j-1}} \right) \Big|_{\mathbf{y}=\bar{\mathbf{y}}}. \quad (\text{B13})$$

1784 Eq. (B13) is a recurrence equation for  $d\mathbf{x}_j^T/d\mathbf{x}_a$  over age  $j \in \{2, \dots, N_a\}$ . Because of the arrow of developmental time  
1785 (due to the developmental constraint (1)), perturbations in an individual's late phenotype do not affect the individual's  
1786 early phenotype (i.e.,  $d\mathbf{x}_j^T/d\mathbf{x}_a = \mathbf{0}$  for  $j < a$  and  $j \in \{1, \dots, N_a - 1\}$ )<sup>1</sup>. Additionally, from the arrow of developmental

<sup>1</sup>More specifically, we take the derivative  $d\mathbf{x}_j^T/dx_{i_a}$  as referring to the effect on  $\mathbf{x}_j^T$  of a perturbation of the initial condition  $\mathbf{x}_a$  of the difference equation (1) applied at the ages  $\{a, \dots, n\}$ . Hence, if  $j < a$ ,  $\mathbf{x}_j^T$  is unmodified by a change in the initial condition of (1) applied at the ages  $\{a, \dots, n\}$ .

time (Eq. 1), a perturbation in an individual's phenotype at a given age does not affect any other of the individual's phenotypes at the *same* age (i.e.,  $\frac{d\mathbf{x}_a^\top}{d\mathbf{x}_a} = \mathbf{I}$  where  $\mathbf{I}$  is the identity matrix). Hence, expanding the recurrence in Eq. (B13), we obtain for  $j \in \{1, \dots, N_a\}$  that

$$\frac{d\mathbf{x}_j^\top}{d\mathbf{x}_a} \Big|_{y=\bar{y}} = \begin{cases} \left( \frac{d\mathbf{x}_a^\top}{d\mathbf{x}_a} \frac{\delta\mathbf{x}_{a+1}^\top}{\delta\mathbf{x}_a} \dots \frac{\delta\mathbf{x}_j^\top}{\delta\mathbf{x}_{j-1}} \right) \Big|_{y=\bar{y}} & \text{for } j > a \\ \frac{d\mathbf{x}_a^\top}{d\mathbf{x}_a} \Big|_{y=\bar{y}} & \text{for } j = a \\ \mathbf{0} & \text{for } j < a \end{cases} = \begin{cases} \left( \frac{\delta\mathbf{x}_{a+1}^\top}{\delta\mathbf{x}_a} \dots \frac{\delta\mathbf{x}_j^\top}{\delta\mathbf{x}_{j-1}} \right) \Big|_{y=\bar{y}} & \text{for } j > a \\ \mathbf{I} & \text{for } j = a \\ \mathbf{0} & \text{for } j < a. \end{cases} \quad (\text{B14})$$

Thus, the block matrix of *total effects of a mutant's phenotype on her phenotype* is

$$\frac{d\mathbf{x}^\top}{d\mathbf{x}} \Big|_{y=\bar{y}} = \begin{pmatrix} \frac{d\mathbf{x}_1^\top}{d\mathbf{x}_1} & \dots & \frac{d\mathbf{x}_{N_a}^\top}{d\mathbf{x}_1} \\ \vdots & \ddots & \vdots \\ \frac{d\mathbf{x}_1^\top}{d\mathbf{x}_{N_a}} & \dots & \frac{d\mathbf{x}_{N_a}^\top}{d\mathbf{x}_{N_a}} \end{pmatrix} \Big|_{y=\bar{y}} = \begin{pmatrix} \mathbf{I} & \frac{d\mathbf{x}_2^\top}{d\mathbf{x}_1} & \dots & \frac{d\mathbf{x}_{N_a-1}^\top}{d\mathbf{x}_1} & \frac{d\mathbf{x}_{N_a}^\top}{d\mathbf{x}_1} \\ \mathbf{0} & \mathbf{I} & \dots & \frac{d\mathbf{x}_{N_a-1}^\top}{d\mathbf{x}_2} & \frac{d\mathbf{x}_{N_a}^\top}{d\mathbf{x}_2} \\ \vdots & \vdots & \ddots & \vdots & \vdots \\ \mathbf{0} & \mathbf{0} & \dots & \mathbf{I} & \frac{d\mathbf{x}_{N_a}^\top}{d\mathbf{x}_{N_a-1}} \\ \mathbf{0} & \mathbf{0} & \dots & \mathbf{0} & \mathbf{I} \end{pmatrix} \Big|_{y=\bar{y}} \quad (\text{B15})$$

$$\in \mathbb{R}^{N_a N_p \times N_a N_p},$$

which is block upper triangular and its  $a$ - $j$ -th block entry is given by Layer 4, Eq. 2. Eq. (B15) and Layer 4, Eq. 2 write the matrix of total effects of a mutant's phenotype on her phenotype in terms of partial derivatives, given Eq. (B10), as we sought.

From Eq. (B15), it follows that the matrix of total effects of a mutant's phenotype on her phenotype  $\frac{d\mathbf{x}^\top}{d\mathbf{x}} \Big|_{y=\bar{y}}$  is invertible. Indeed, since  $\frac{d\mathbf{x}^\top}{d\mathbf{x}} \Big|_{y=\bar{y}}$  is square and block upper triangular, then its determinant is

$$\det \left( \frac{d\mathbf{x}^\top}{d\mathbf{x}} \Big|_{y=\bar{y}} \right) = \det \left( \frac{d\mathbf{x}_1^\top}{d\mathbf{x}_1} \Big|_{y=\bar{y}} \right) \dots \det \left( \frac{d\mathbf{x}_{N_a}^\top}{d\mathbf{x}_{N_a}} \Big|_{y=\bar{y}} \right)$$

(Horn and Johnson, 2013, p. 32). Since  $\frac{d\mathbf{x}_a^\top}{d\mathbf{x}_a} \Big|_{y=\bar{y}} = \mathbf{I}$ , then  $\det(\frac{d\mathbf{x}_a^\top}{d\mathbf{x}_a} \Big|_{y=\bar{y}}) = 1$  for all  $a \in \{1, \dots, N_a\}$ . Hence,  $\det(\frac{d\mathbf{x}^\top}{d\mathbf{x}} \Big|_{y=\bar{y}}) \neq 0$ , so  $\frac{d\mathbf{x}^\top}{d\mathbf{x}} \Big|_{y=\bar{y}}$  is invertible.

1798 We now obtain a more compact expression for the matrix of total effects of a mutant's phenotype on her phenotype  
 1799 in terms of partial derivatives. From Eq. (B11), it follows that

$$\frac{\delta \mathbf{x}^\top}{\delta \mathbf{x}} \Big|_{\mathbf{y}=\bar{\mathbf{y}}} - \mathbf{I} = \left( \begin{array}{cccc} \mathbf{0} & \frac{\delta \mathbf{x}_2^\top}{\delta \mathbf{x}_1} & \cdots & \mathbf{0} & \mathbf{0} \\ \mathbf{0} & \mathbf{0} & \cdots & \mathbf{0} & \mathbf{0} \\ \vdots & \vdots & \ddots & \vdots & \vdots \\ \mathbf{0} & \mathbf{0} & \cdots & \mathbf{0} & \frac{\delta \mathbf{x}_{N_a}^\top}{\delta \mathbf{x}_{N_a-1}} \\ \mathbf{0} & \mathbf{0} & \cdots & \mathbf{0} & \mathbf{0} \end{array} \right) \Big|_{\mathbf{y}=\bar{\mathbf{y}}}, \quad (\text{B16})$$

1800 which is block 1-superdiagonal (i.e., only the entries in its first block super diagonal are non-zero). By definition of  
 1801 matrix power, we have that  $(\delta \mathbf{x}^\top / \delta \mathbf{x} - \mathbf{I})^0 = \mathbf{I}$ . Now, from Eq. (B16), we have that

$$\frac{\delta \mathbf{x}^\top}{\delta \mathbf{x}} - \mathbf{I} = \left( \begin{array}{cc} \frac{\delta \mathbf{x}_j^\top}{\delta \mathbf{x}_a} & \text{if } j = a + 1 \\ \mathbf{0} & \text{otherwise} \end{array} \right).$$

1802 Using Eq. (B16), taking the second power yields

$$\begin{aligned} \left( \frac{\delta \mathbf{x}^\top}{\delta \mathbf{x}} - \mathbf{I} \right)^2 &= \left( \frac{\delta \mathbf{x}^\top}{\delta \mathbf{x}} - \mathbf{I} \right) \left( \frac{\delta \mathbf{x}^\top}{\delta \mathbf{x}} - \mathbf{I} \right) \\ &= \left( \begin{array}{cc} \frac{\delta \mathbf{x}_{a+1}^\top}{\delta \mathbf{x}_a} & \frac{\delta \mathbf{x}_j^\top}{\delta \mathbf{x}_{a+1}} \\ \mathbf{0} & \text{otherwise} \end{array} \right), \end{aligned}$$

1803 which is block 2-superdiagonal. This suggests the inductive hypothesis that

$$\left( \frac{\delta \mathbf{x}^\top}{\delta \mathbf{x}} - \mathbf{I} \right)^i = \left( \begin{array}{cc} \prod_{k=a}^{j-1} \frac{\delta \mathbf{x}_{k+1}^\top}{\delta \mathbf{x}_k} & \text{if } j = a + i \\ \mathbf{0} & \text{otherwise} \end{array} \right) \quad (\text{B17})$$

1804 holds for some  $i \in \{0, 1, \dots\}$ , which is a block  $i$ -superdiagonal matrix. If this is the case, then we have that

$$\begin{aligned} \left( \frac{\delta \mathbf{x}^\top}{\delta \mathbf{x}} - \mathbf{I} \right)^{i+1} &= \left( \frac{\delta \mathbf{x}^\top}{\delta \mathbf{x}} - \mathbf{I} \right)^i \left( \frac{\delta \mathbf{x}^\top}{\delta \mathbf{x}} - \mathbf{I} \right) \\ &= \left( \begin{array}{cc} \prod_{k=a}^{a+i-1} \frac{\delta \mathbf{x}_{k+1}^\top}{\delta \mathbf{x}_k} & \frac{\delta \mathbf{x}_j^\top}{\delta \mathbf{x}_{a+i}} \\ \mathbf{0} & \text{otherwise} \end{array} \right) \\ &= \left( \begin{array}{cc} \prod_{k=a}^{j-1} \frac{\delta \mathbf{x}_{k+1}^\top}{\delta \mathbf{x}_k} & \text{if } j = a + i + 1 \\ \mathbf{0} & \text{otherwise} \end{array} \right). \end{aligned}$$

This proves by induction that Eq. (B17) holds for every  $i \in \{0, 1, \dots\}$ , which together with Layer 4, Eq. 2 proves that

$$\left(\frac{\delta \mathbf{x}^\top}{\delta \mathbf{x}} - \mathbf{I}\right)^i = \begin{cases} \left(\frac{d\mathbf{x}_j^\top}{d\mathbf{x}_a}\right) & \text{if } j = a + i \\ \mathbf{0} & \text{otherwise} \end{cases}$$

holds for all  $i \in \{0, 1, \dots, N_a\}$ . Evaluating this result at various  $i$ , note that

$$\left(\frac{\delta \mathbf{x}^\top}{\delta \mathbf{x}} - \mathbf{I}\right)^0 = \begin{cases} \left(\frac{d\mathbf{x}_j^\top}{d\mathbf{x}_a}\right) & \text{if } j = a \\ \mathbf{0} & \text{otherwise} \end{cases} = \begin{cases} \mathbf{I} & \text{if } j = a \\ \mathbf{0} & \text{otherwise} \end{cases}$$

is a block matrix of zeros except in its block main diagonal which coincides with the block main diagonal of Eq. (B15).

Similarly,

$$\left(\frac{\delta \mathbf{x}^\top}{\delta \mathbf{x}} - \mathbf{I}\right)^1 = \begin{cases} \left(\frac{d\mathbf{x}_{a+1}^\top}{d\mathbf{x}_a}\right) & \text{if } j = a + 1 \\ \mathbf{0} & \text{otherwise} \end{cases}$$

is a block matrix of zeros except in its first block super diagonal which coincides with the first block super diagonal of Eq. (B15). Indeed,

$$\left(\frac{\delta \mathbf{x}^\top}{\delta \mathbf{x}} - \mathbf{I}\right)^i = \begin{cases} \left(\frac{d\mathbf{x}_{a+i}^\top}{d\mathbf{x}_a}\right) & \text{if } j = a + i \\ \mathbf{0} & \text{otherwise} \end{cases}$$

is a block matrix of zeros except in its  $i$ -th block super diagonal which coincides with the  $i$ -th block super diagonal of Eq. (B15) for all  $i \in \{1, \dots, N_a - 1\}$ . Therefore, since any non-zero entry of the matrix  $(\delta \mathbf{x}^\top / \delta \mathbf{x} - \mathbf{I})^i$  corresponds to a zero entry for the matrix  $(\delta \mathbf{x}^\top / \delta \mathbf{x} - \mathbf{I})^j$  for any  $i \neq j$  with  $i, j \in \{0, \dots, N_a - 1\}$ , it follows that

$$\frac{d\mathbf{x}^\top}{d\mathbf{x}} = \sum_{i=0}^{N_a-1} \left(\frac{\delta \mathbf{x}^\top}{\delta \mathbf{x}} - \mathbf{I}\right)^i. \quad (\text{B18})$$

From the geometric series of matrices we have that

$$\begin{aligned} \sum_{i=0}^{N_a-1} \left(\frac{\delta \mathbf{x}^\top}{\delta \mathbf{x}} - \mathbf{I}\right)^i &= \left[\mathbf{I} - \left(\frac{\delta \mathbf{x}^\top}{\delta \mathbf{x}} - \mathbf{I}\right)\right]^{-1} \left[\mathbf{I} - \left(\frac{\delta \mathbf{x}^\top}{\delta \mathbf{x}} - \mathbf{I}\right)^{N_a}\right] \\ &= \left(2\mathbf{I} - \frac{\delta \mathbf{x}^\top}{\delta \mathbf{x}}\right)^{-1}. \end{aligned} \quad (\text{B19})$$

The last equality follows because  $\delta \mathbf{x}^\top / \delta \mathbf{x} - \mathbf{I}$  is strictly block triangular with block dimension  $N_a$  and so  $\delta \mathbf{x}^\top / \delta \mathbf{x} - \mathbf{I}$  is nilpotent with index smaller than or equal to  $N_a$ , which implies that  $(\delta \mathbf{x}^\top / \delta \mathbf{x} - \mathbf{I})^{N_a} = \mathbf{0}$ . From Eq. (B11), the matrix  $2\mathbf{I} - \delta \mathbf{x}^\top / \delta \mathbf{x}$  is block upper triangular with only identity matrices in its block main diagonal, so all the eigenvalues of  $2\mathbf{I} - \delta \mathbf{x}^\top / \delta \mathbf{x}$  equal one and the matrix is invertible; thus, the inverse matrix in Eq. (B19) exists. Finally, using Eq. (B19) in (B18) yields Layer 4, Eq. 1, which is a compact expression for the matrix of total effects of a mutant's phenotype on her phenotype in terms of partial derivatives only, once Layer 3, Eq. 3 is used.

1821 *Appendix B.3. Conclusion*

1822 *Appendix B.3.1. Form 1*

1823 Using Eqs. (B7) and (Layer 3, Eq. 1) for  $\zeta = \mathbf{x}$ , we have that the total selection gradient of the phenotype is

$$\left. \frac{dw}{d\mathbf{x}} \right|_{\mathbf{y}=\bar{\mathbf{y}}} = \left[ \frac{d\mathbf{x}^T}{d\mathbf{x}} \left( \frac{\partial w}{\partial \mathbf{x}} + \frac{\partial \boldsymbol{\epsilon}^T}{\partial \mathbf{x}} \frac{\partial w}{\partial \boldsymbol{\epsilon}} \right) \right] \Bigg|_{\mathbf{y}=\bar{\mathbf{y}}}.$$

1824 Thus, using Layer 4, Eq. 10 yields the first line of Layer 4, Eq. 21.

1825 *Appendix B.3.2. Form 2*

1826 Using Eq. (B7), the total selection gradient of the phenotype is given by the second line of Layer 4, Eq. 21.

1827 *Appendix B.3.3. Form 3*

1828 Using Eqs. (B7), Layer 3, Eq. 1 for  $\zeta = \mathbf{z}$ , and Layer 4, Eq. 7, we have that the total selection gradient of the  
1829 phenotype is given by the third line of Layer 4, Eq. 21, where the *total immediate selection gradient of the geno-*  
1830 *phenotype* is

$$\left. \frac{\delta w}{\delta \mathbf{z}} \right|_{\mathbf{y}=\bar{\mathbf{y}}} \equiv \begin{pmatrix} \delta w \\ \delta \mathbf{x} \\ \delta w \\ \delta \mathbf{y} \end{pmatrix} \Bigg|_{\mathbf{y}=\bar{\mathbf{y}}} \in \mathbb{R}^{N_a(N_p+N_g) \times 1}. \quad (\text{B20})$$

1831 *Appendix B.3.4. Form 4*

1832 Finally, using the first line of Layer 4, Eq. 21 and Layer 4, Eq. 14, we obtain the fourth line of Layer 4, Eq. 21.

1833 **Appendix C. Total selection gradient of the genotype**

1834 *Appendix C.1. Total selection gradient of the genotype in terms of direct fitness effects*

1835 Here we derive the total selection gradient of the genotype following an analogous procedure to the one used in  
1836 Appendix B for the total selection gradient of the phenotype. The  $i$ -th genotypic trait value at age  $a$  is  $y_{ia}$ , so letting  $\zeta$   
1837 in Eq. (S19) be  $y_{ia}$ , we have

$$\left. \frac{d\lambda}{dy_{ia}} \right|_{\mathbf{y}=\bar{\mathbf{y}}} = \left. \frac{dw}{dy_{ia}} \right|_{\mathbf{y}=\bar{\mathbf{y}}} = \sum_{j=1}^{N_a} \left. \frac{dw_j}{dy_{ia}} \right|_{\mathbf{y}=\bar{\mathbf{y}}}. \quad (\text{C1})$$

1838 The total derivatives of a mutant's relative fitness at age  $j$  in Eq. (C1) are with respect to the individual's genotypic  
1839 trait at possibly another age  $a$ . We now seek to express such selection gradient entry in terms of partial derivatives  
1840 only.

1841 From Eq. (S17), we have  $w_j(\mathbf{z}_j, \mathbf{h}_j(\mathbf{z}_j, \bar{\mathbf{z}}, \tau), \bar{\mathbf{m}})$  with  $\mathbf{z}_j = (\mathbf{x}_j; \mathbf{y}_j)$ , so applying the chain rule, we obtain

$$\left. \frac{dw_j}{dy_{ia}} \right|_{\mathbf{y}=\bar{\mathbf{y}}} = \left( \sum_{k=1}^{N_p} \frac{\partial w_j}{\partial x_{kj}} \frac{dx_{kj}}{dy_{ia}} + \sum_{k=1}^{N_g} \frac{\partial w_j}{\partial y_{kj}} \frac{dy_{kj}}{dy_{ia}} \right)$$



$$+ \sum_{k=1}^{N_p} \sum_{r=1}^{N_e} \frac{\partial w_j}{\partial \epsilon_{rj}} \frac{\partial \epsilon_{rj}}{\partial x_{kj}} \frac{dx_{kj}}{dy_{ia}} + \sum_{k=1}^{N_g} \sum_{r=1}^{N_e} \frac{\partial w_j}{\partial \epsilon_{rj}} \frac{\partial \epsilon_{rj}}{\partial y_{kj}} \frac{dy_{kj}}{dy_{ia}} \Bigg|_{y=\bar{y}}.$$

Applying matrix calculus notation (Appendix A), this is

1842

$$\frac{dw_j}{dy_{ia}} \Bigg|_{y=\bar{y}} = \left( \frac{dx_j^T}{dy_{ia}} \frac{\partial w_j}{\partial x_j} + \frac{dy_j^T}{dy_{ia}} \frac{\partial w_j}{\partial y_j} + \sum_{k=1}^{N_p} \frac{\partial \epsilon_j^T}{\partial x_{kj}} \frac{\partial w_j}{\partial \epsilon_j} \frac{dx_{kj}}{dy_{ia}} + \sum_{k=1}^{N_g} \frac{\partial \epsilon_j^T}{\partial y_{kj}} \frac{\partial w_j}{\partial \epsilon_j} \frac{dy_{kj}}{dy_{ia}} \right) \Bigg|_{y=\bar{y}}.$$

Applying matrix calculus notation again yields

1843

$$\frac{dw_j}{dy_{ia}} \Bigg|_{y=\bar{y}} = \left( \frac{dx_j^T}{dy_{ia}} \frac{\partial w_j}{\partial x_j} + \frac{dy_j^T}{dy_{ia}} \frac{\partial w_j}{\partial y_j} + \frac{dx_j^T}{dy_{ia}} \frac{\partial \epsilon_j^T}{\partial x_j} \frac{\partial w_j}{\partial \epsilon_j} + \frac{dy_j^T}{dy_{ia}} \frac{\partial \epsilon_j^T}{\partial y_j} \frac{\partial w_j}{\partial \epsilon_j} \right) \Bigg|_{y=\bar{y}}.$$

Factorizing, we have

1844

$$\frac{dw_j}{dy_{ia}} \Bigg|_{y=\bar{y}} = \left[ \frac{dx_j^T}{dy_{ia}} \left( \frac{\partial w_j}{\partial x_j} + \frac{\partial \epsilon_j^T}{\partial x_j} \frac{\partial w_j}{\partial \epsilon_j} \right) + \frac{dy_j^T}{dy_{ia}} \left( \frac{\partial w_j}{\partial y_j} + \frac{\partial \epsilon_j^T}{\partial y_j} \frac{\partial w_j}{\partial \epsilon_j} \right) \right] \Bigg|_{y=\bar{y}}. \quad (C2)$$

We now write Eq. (C2) in terms of partial derivatives of lifetime fitness. Consider the *direct selection gradient of the genotype at age j*

1845

1846

$$\frac{\partial w}{\partial y_j} \Bigg|_{y=\bar{y}} \equiv \left( \frac{\partial w}{\partial y_{1j}}, \dots, \frac{\partial w}{\partial y_{N_g j}} \right)^T \Bigg|_{y=\bar{y}} \in \mathbb{R}^{N_g \times 1},$$

and the matrix of *direct effects of a mutant's genotype at age j on her environment at age j*

1847

$$\frac{\partial \epsilon_j^T}{\partial y_j} \Bigg|_{y=\bar{y}} \equiv \begin{pmatrix} \frac{\partial \epsilon_{1j}}{\partial y_{1j}} & \dots & \frac{\partial \epsilon_{N_e j}}{\partial y_{1j}} \\ \vdots & \ddots & \vdots \\ \frac{\partial \epsilon_{1j}}{\partial y_{N_g j}} & \dots & \frac{\partial \epsilon_{N_e j}}{\partial y_{N_g j}} \end{pmatrix} \Bigg|_{y=\bar{y}} \in \mathbb{R}^{N_g \times N_e}.$$

Using Eqs. (B3) and (B5) in Eq. (C2) yields

1848

$$\frac{dw_j}{dy_{ia}} \Bigg|_{y=\bar{y}} = \left[ \frac{dx_j^T}{dy_{ia}} \left( \frac{\partial w}{\partial x_j} + \frac{\partial \epsilon_j^T}{\partial x_j} \frac{\partial w}{\partial \epsilon_j} \right) + \frac{dy_j^T}{dy_{ia}} \left( \frac{\partial w}{\partial y_j} + \frac{\partial \epsilon_j^T}{\partial y_j} \frac{\partial w}{\partial \epsilon_j} \right) \right] \Bigg|_{y=\bar{y}}$$

$$= \left( \frac{d\mathbf{x}_j^\top}{dy_{ia}} \frac{\delta w}{\delta \mathbf{x}_j} + \frac{d\mathbf{y}_j^\top}{dy_{ia}} \frac{\delta w}{\delta \mathbf{y}_j} \right) \Big|_{\mathbf{y}=\bar{\mathbf{y}}}, \quad (\text{C3})$$

1849 where we use the *total immediate selection gradient of the genotype at age  $j$*  or, equivalently, the *total immediate*  
1850 *effects of a mutant's genotype at age  $j$  on fitness*

$$\frac{\delta w}{\delta \mathbf{y}_j} \Big|_{\mathbf{y}=\bar{\mathbf{y}}} = \left( \frac{\partial w}{\partial \mathbf{y}_j} + \frac{\partial \boldsymbol{\epsilon}_j^\top}{\partial \mathbf{y}_j} \frac{\partial w}{\partial \boldsymbol{\epsilon}_j} \right) \Big|_{\mathbf{y}=\bar{\mathbf{y}}} \in \mathbb{R}^{N_g \times 1}. \quad (\text{C4})$$

1851 Consider now the *total immediate selection gradient of the genotype* for all ages

$$\frac{\delta w}{\delta \mathbf{y}} \Big|_{\mathbf{y}=\bar{\mathbf{y}}} \equiv \left( \frac{\delta w}{\delta \mathbf{y}_1}; \dots; \frac{\delta w}{\delta \mathbf{y}_{N_a}} \right) \Big|_{\mathbf{y}=\bar{\mathbf{y}}} \in \mathbb{R}^{N_a N_g \times 1}.$$

1852 Using Layer 2, Eq. 2d, we have that

$$\frac{\partial \boldsymbol{\epsilon}^\top}{\partial \mathbf{y}} \frac{\partial w}{\partial \boldsymbol{\epsilon}} = \left( \sum_{k=1}^{N_a} \frac{\partial \boldsymbol{\epsilon}_k^\top}{\partial \mathbf{y}_j} \frac{\partial w}{\partial \boldsymbol{\epsilon}_k} \right) = \left( \frac{\partial \boldsymbol{\epsilon}_j^\top}{\partial \mathbf{y}_j} \frac{\partial w}{\partial \boldsymbol{\epsilon}_j} \right) \quad (\text{C5})$$

1853 is a block column vector whose  $j$ -th entry is the rightmost term in Eq. (C4). Thus, from (C4), Layer 2, Eq. 1, and  
1854 (C5), it follows that the total immediate selection gradient of the genotype satisfies Layer 3, Eq. 1.

1855 Now, we write the total selection gradient of  $y_{ia}$  in terms of the total immediate selection gradient of the genotype.  
1856 Substituting Eq. (C3) in Eq. (C1) yields

$$\begin{aligned} \frac{dw}{dy_{ia}} \Big|_{\mathbf{y}=\bar{\mathbf{y}}} &= \sum_{j=1}^{N_a} \left( \frac{d\mathbf{x}_j^\top}{dy_{ia}} \frac{\delta w}{\delta \mathbf{x}_j} + \frac{d\mathbf{y}_j^\top}{dy_{ia}} \frac{\delta w}{\delta \mathbf{y}_j} \right) \Big|_{\mathbf{y}=\bar{\mathbf{y}}} \\ &= \left( \frac{d\mathbf{x}^\top}{dy_{ia}} \frac{\delta w}{\delta \mathbf{x}} + \frac{d\mathbf{y}^\top}{dy_{ia}} \frac{\delta w}{\delta \mathbf{y}} \right) \Big|_{\mathbf{y}=\bar{\mathbf{y}}}, \end{aligned}$$

1857 where we use the block row vectors

$$\begin{aligned} \frac{d\mathbf{x}^\top}{dy_{ia}} &\equiv \left( \frac{d\mathbf{x}_1^\top}{dy_{ia}}, \dots, \frac{d\mathbf{x}_{N_a}^\top}{dy_{ia}} \right) \in \mathbb{R}^{1 \times N_a N_p} \\ \frac{d\mathbf{y}^\top}{dy_{ia}} &\equiv \left( \frac{d\mathbf{y}_1^\top}{dy_{ia}}, \dots, \frac{d\mathbf{y}_{N_a}^\top}{dy_{ia}} \right) \in \mathbb{R}^{1 \times N_a N_g}. \end{aligned}$$

1858 Therefore, the total selection gradient of the genotype for all genotypic traits across all ages is

$$\frac{dw}{d\mathbf{y}} \Big|_{\mathbf{y}=\bar{\mathbf{y}}} = \left( \frac{d\mathbf{x}^\top}{d\mathbf{y}} \frac{\delta w}{\delta \mathbf{x}} + \frac{d\mathbf{y}^\top}{d\mathbf{y}} \frac{\delta w}{\delta \mathbf{y}} \right) \Big|_{\mathbf{y}=\bar{\mathbf{y}}} \in \mathbb{R}^{N_a N_p \times 1}, \quad (\text{C6})$$

1859 where we use the block matrix of *total effects of a mutant's genotype on her phenotype*

$$\frac{d\mathbf{x}^\top}{d\mathbf{y}} \Big|_{\mathbf{y}=\bar{\mathbf{y}}} \equiv \begin{pmatrix} \frac{d\mathbf{x}_1^\top}{dy_1} & \dots & \frac{d\mathbf{x}_{N_a}^\top}{dy_1} \\ \vdots & \ddots & \vdots \\ \frac{d\mathbf{x}_1^\top}{dy_{N_a}} & \dots & \frac{d\mathbf{x}_{N_a}^\top}{dy_{N_a}} \end{pmatrix} \Big|_{\mathbf{y}=\bar{\mathbf{y}}} \in \mathbb{R}^{N_a N_g \times N_a N_p},$$

and the block matrix of *total effects of a mutant's genotype on her genotype*

1860

$$\frac{d\mathbf{y}^\top}{d\mathbf{y}} \Big|_{\mathbf{y}=\bar{\mathbf{y}}} \equiv \begin{pmatrix} \frac{d\mathbf{y}_1^\top}{d\mathbf{y}_1} & \dots & \frac{d\mathbf{y}_{N_a}^\top}{d\mathbf{y}_1} \\ \vdots & \ddots & \vdots \\ \frac{d\mathbf{y}_1^\top}{d\mathbf{y}_{N_a}} & \dots & \frac{d\mathbf{y}_{N_a}^\top}{d\mathbf{y}_{N_a}} \end{pmatrix} \Big|_{\mathbf{y}=\bar{\mathbf{y}}} \in \mathbb{R}^{N_a N_g \times N_a N_g}.$$

Expression (C6) is now in terms of partial derivatives of fitness, partial derivatives of the environment, total effects of a mutant's genotype on her phenotype,  $d\mathbf{x}^\top/d\mathbf{y}$ , and total effects of a mutant's genotype on her genotype,  $d\mathbf{y}^\top/d\mathbf{y}$ , once Layer 3, Eq. 1 is used. We now proceed to write  $d\mathbf{x}^\top/d\mathbf{y}$  and  $d\mathbf{y}^\top/d\mathbf{y}$  in terms of partial derivatives only.

1861

1862

1863

### Appendix C.2. Matrix of total effects of a mutant's genotype on her phenotype and her genotype

1864

From the developmental constraint (1) for the  $k$ -th phenotype at age  $j \in \{2, \dots, N_a\}$  we have that  $x_{kj} = g_{k,j-1}(\mathbf{z}_{j-1}, \mathbf{h}_{j-1}(\mathbf{z}_{j-1}, \bar{\mathbf{z}}, \tau), \bar{\mathbf{z}})$ , so using the chain rule we obtain

1865

1866

$$\begin{aligned} \frac{dx_{kj}}{dy_{ia}} \Big|_{\mathbf{y}=\bar{\mathbf{y}}} &= \left( \sum_{l=1}^{N_p} \frac{\partial g_{k,j-1}}{\partial x_{l,j-1}} \frac{dx_{l,j-1}}{dy_{ia}} + \sum_{l=1}^{N_g} \frac{\partial g_{k,j-1}}{\partial y_{l,j-1}} \frac{dy_{l,j-1}}{dy_{ia}} \right. \\ &\quad + \sum_{l=1}^{N_p} \sum_{r=1}^{N_e} \frac{\partial g_{k,j-1}}{\partial \epsilon_{r,j-1}} \frac{\partial \epsilon_{r,j-1}}{\partial x_{l,j-1}} \frac{dx_{l,j-1}}{dy_{ia}} \\ &\quad \left. + \sum_{l=1}^{N_g} \sum_{r=1}^{N_e} \frac{\partial g_{k,j-1}}{\partial \epsilon_{r,j-1}} \frac{\partial \epsilon_{r,j-1}}{\partial y_{l,j-1}} \frac{dy_{l,j-1}}{dy_{ia}} \right) \Big|_{\mathbf{y}=\bar{\mathbf{y}}}. \end{aligned}$$

Applying matrix calculus notation (Appendix A), this is

1867

$$\begin{aligned} \frac{dx_{kj}}{dy_{ia}} \Big|_{\mathbf{y}=\bar{\mathbf{y}}} &= \left( \frac{d\mathbf{x}_{j-1}^\top}{dy_{ia}} \frac{\partial g_{k,j-1}}{\partial \mathbf{x}_{j-1}} + \frac{d\mathbf{y}_{j-1}^\top}{dy_{ia}} \frac{\partial g_{k,j-1}}{\partial \mathbf{y}_{j-1}} \right. \\ &\quad + \sum_{l=1}^{N_p} \frac{\partial \boldsymbol{\epsilon}_{j-1}^\top}{\partial x_{l,j-1}} \frac{\partial g_{k,j-1}}{\partial \boldsymbol{\epsilon}_{j-1}} \frac{dx_{l,j-1}}{dy_{ia}} \\ &\quad \left. + \sum_{l=1}^{N_g} \frac{\partial \boldsymbol{\epsilon}_{j-1}^\top}{\partial y_{l,j-1}} \frac{\partial g_{k,j-1}}{\partial \boldsymbol{\epsilon}_{j-1}} \frac{dy_{l,j-1}}{dy_{ia}} \right) \Big|_{\mathbf{y}=\bar{\mathbf{y}}}. \end{aligned}$$

Applying matrix calculus notation again yields

1868

$$\begin{aligned} \frac{dx_{kj}}{dy_{ia}} \Big|_{\mathbf{y}=\bar{\mathbf{y}}} &= \left( \frac{d\mathbf{x}_{j-1}^\top}{dy_{ia}} \frac{\partial g_{k,j-1}}{\partial \mathbf{x}_{j-1}} + \frac{d\mathbf{y}_{j-1}^\top}{dy_{ia}} \frac{\partial g_{k,j-1}}{\partial \mathbf{y}_{j-1}} \right. \\ &\quad + \frac{d\mathbf{x}_{j-1}^\top}{dy_{ia}} \frac{\partial \boldsymbol{\epsilon}_{j-1}^\top}{\partial \mathbf{x}_{j-1}} \frac{\partial g_{k,j-1}}{\partial \boldsymbol{\epsilon}_{j-1}} \\ &\quad \left. + \frac{d\mathbf{y}_{j-1}^\top}{dy_{ia}} \frac{\partial \boldsymbol{\epsilon}_{j-1}^\top}{\partial \mathbf{y}_{j-1}} \frac{\partial g_{k,j-1}}{\partial \boldsymbol{\epsilon}_{j-1}} \right) \Big|_{\mathbf{y}=\bar{\mathbf{y}}}. \end{aligned}$$

Factorizing, we have

1869

$$\frac{dx_{kj}}{dy_{ia}} \Big|_{\mathbf{y}=\bar{\mathbf{y}}} = \left[ \frac{d\mathbf{x}_{j-1}^\top}{dy_{ia}} \left( \frac{\partial g_{k,j-1}}{\partial \mathbf{x}_{j-1}} + \frac{\partial \boldsymbol{\epsilon}_{j-1}^\top}{\partial \mathbf{x}_{j-1}} \frac{\partial g_{k,j-1}}{\partial \boldsymbol{\epsilon}_{j-1}} \right) \right]$$

$$+ \frac{d\mathbf{y}_{j-1}^\top}{dy_{ia}} \left( \frac{\partial g_{k,j-1}}{\partial \mathbf{y}_{j-1}} + \frac{\partial \boldsymbol{\epsilon}_{j-1}^\top}{\partial \mathbf{y}_{j-1}} \frac{\partial g_{k,j-1}}{\partial \boldsymbol{\epsilon}_{j-1}} \right) \Big|_{\mathbf{y}=\bar{\mathbf{y}}}.$$

1870 Rewriting  $g_{k,j-1}$  as  $x_{kj}$  yields

$$\begin{aligned} \frac{dx_{kj}}{dy_{ia}} \Big|_{\mathbf{y}=\bar{\mathbf{y}}} &= \left[ \frac{d\mathbf{x}_{j-1}^\top}{dy_{ia}} \left( \frac{\partial x_{kj}}{\partial \mathbf{x}_{j-1}} + \frac{\partial \boldsymbol{\epsilon}_{j-1}^\top}{\partial \mathbf{x}_{j-1}} \frac{\partial x_{kj}}{\partial \boldsymbol{\epsilon}_{j-1}} \right) \right. \\ &\quad \left. + \frac{d\mathbf{y}_{j-1}^\top}{dy_{ia}} \left( \frac{\partial x_{kj}}{\partial \mathbf{y}_{j-1}} + \frac{\partial \boldsymbol{\epsilon}_{j-1}^\top}{\partial \mathbf{y}_{j-1}} \frac{\partial x_{kj}}{\partial \boldsymbol{\epsilon}_{j-1}} \right) \right] \Big|_{\mathbf{y}=\bar{\mathbf{y}}}. \end{aligned}$$

1871 Hence,

$$\begin{aligned} \frac{d\mathbf{x}_j^\top}{dy_{ia}} \Big|_{\mathbf{y}=\bar{\mathbf{y}}} &= \left[ \frac{d\mathbf{x}_{j-1}^\top}{dy_{ia}} \left( \frac{\partial \mathbf{x}_j^\top}{\partial \mathbf{x}_{j-1}} + \frac{\partial \boldsymbol{\epsilon}_{j-1}^\top}{\partial \mathbf{x}_{j-1}} \frac{\partial \mathbf{x}_j^\top}{\partial \boldsymbol{\epsilon}_{j-1}} \right) \right. \\ &\quad \left. + \frac{d\mathbf{y}_{j-1}^\top}{dy_{ia}} \left( \frac{\partial \mathbf{x}_j^\top}{\partial \mathbf{y}_{j-1}} + \frac{\partial \boldsymbol{\epsilon}_{j-1}^\top}{\partial \mathbf{y}_{j-1}} \frac{\partial \mathbf{x}_j^\top}{\partial \boldsymbol{\epsilon}_{j-1}} \right) \right] \Big|_{\mathbf{y}=\bar{\mathbf{y}}}, \end{aligned} \quad (C7)$$

1872 where we use the matrix of *direct effects of a mutant's genotypic trait values at age  $j$  on her phenotype at age  $j+1$*

$$\frac{\partial \mathbf{x}_{j+1}^\top}{\partial \mathbf{y}_j} \Big|_{\mathbf{y}=\bar{\mathbf{y}}} \equiv \begin{pmatrix} \frac{\partial x_{1,j+1}}{\partial y_{1j}} & \dots & \frac{\partial x_{N_p,j+1}}{\partial y_{1j}} \\ \vdots & \ddots & \vdots \\ \frac{\partial x_{1,j+1}}{\partial y_{N_g j}} & \dots & \frac{\partial x_{N_p,j+1}}{\partial y_{N_g j}} \end{pmatrix} \Big|_{\mathbf{y}=\bar{\mathbf{y}}} \in \mathbb{R}^{N_g \times N_p}.$$

1873 We can write Eq. (C7) more succinctly as

$$\frac{d\mathbf{x}_j^\top}{dy_{ia}} \Big|_{\mathbf{y}=\bar{\mathbf{y}}} = \left( \frac{d\mathbf{x}_{j-1}^\top}{dy_{ia}} \frac{\delta \mathbf{x}_j^\top}{\delta \mathbf{x}_{j-1}} + \frac{d\mathbf{y}_{j-1}^\top}{dy_{ia}} \frac{\delta \mathbf{x}_j^\top}{\delta \mathbf{y}_{j-1}} \right) \Big|_{\mathbf{y}=\bar{\mathbf{y}}}, \quad (C8)$$

1874 where we use the matrix of *total immediate effects of a mutant's genotypic trait values at age  $j$  on her phenotype at*  
1875 *age  $j+1$*

$$\frac{\delta \mathbf{x}_{j+1}^\top}{\delta \mathbf{y}_j} \Big|_{\mathbf{y}=\bar{\mathbf{y}}} = \left( \frac{\partial \mathbf{x}_{j+1}^\top}{\partial \mathbf{y}_j} + \frac{\partial \boldsymbol{\epsilon}_j^\top}{\partial \mathbf{y}_j} \frac{\partial \mathbf{x}_{j+1}^\top}{\partial \boldsymbol{\epsilon}_j} \right) \Big|_{\mathbf{y}=\bar{\mathbf{y}}} \in \mathbb{R}^{N_g \times N_p}. \quad (C9)$$

1876 We also define the corresponding matrix across all ages. Specifically, the block matrix of *total immediate effects*  
1877 *of a mutant's genotype on her phenotype* is

$$\frac{\delta \mathbf{x}^\top}{\delta \mathbf{y}} \Big|_{\mathbf{y}=\bar{\mathbf{y}}} \equiv \begin{pmatrix} \frac{\delta \mathbf{x}_1^\top}{\delta \mathbf{y}_1} & \dots & \frac{\delta \mathbf{x}_{N_a}^\top}{\delta \mathbf{y}_1} \\ \vdots & \ddots & \vdots \\ \frac{\delta \mathbf{x}_1^\top}{\delta \mathbf{y}_{N_a}} & \dots & \frac{\delta \mathbf{x}_{N_a}^\top}{\delta \mathbf{y}_{N_a}} \end{pmatrix} \Big|_{\mathbf{y}=\bar{\mathbf{y}}}$$

$$= \left( \begin{array}{ccccc} \mathbf{0} & \frac{\delta \mathbf{x}_2^\top}{\delta \mathbf{y}_1} & \cdots & \mathbf{0} & \mathbf{0} \\ \mathbf{0} & \mathbf{0} & \cdots & \mathbf{0} & \mathbf{0} \\ \vdots & \vdots & \ddots & \vdots & \vdots \\ \mathbf{0} & \mathbf{0} & \cdots & \mathbf{0} & \frac{\delta \mathbf{x}_{N_a}^\top}{\delta \mathbf{y}_{N_a-1}} \\ \mathbf{0} & \mathbf{0} & \cdots & \mathbf{0} & \mathbf{0} \end{array} \right) \Bigg|_{\mathbf{y}=\bar{\mathbf{y}}} \quad (\text{C10})$$

$\in \mathbb{R}^{N_a N_g \times N_a N_p}$ .

The equality (C10) follows because the total immediate effects of a mutant's genotypic trait values on her phenotype are only non-zero at the next age (from the developmental constraint in Eq. 1). Using Layer 2, Eq. 2d and Layer 2, Eq. 2c, we have that

$$\frac{\partial \boldsymbol{\epsilon}^\top}{\partial \mathbf{y}} \frac{\partial \mathbf{x}^\top}{\partial \boldsymbol{\epsilon}} = \left( \sum_{k=1}^{N_a} \frac{\partial \boldsymbol{\epsilon}_k^\top}{\partial \mathbf{y}_a} \frac{\partial \mathbf{x}_j^\top}{\partial \boldsymbol{\epsilon}_k} \right) = \begin{cases} \left( \frac{\partial \boldsymbol{\epsilon}_a^\top}{\partial \mathbf{y}_a} \frac{\partial \mathbf{x}_j^\top}{\partial \boldsymbol{\epsilon}_a} \right) & \text{for } j = a + 1 \\ \mathbf{0} & \text{for } j \neq a + 1 \end{cases}, \quad (\text{C11})$$

which equals the rightmost term in Eq. (C9) for  $j = a + 1$ . Thus, from Eqs. (C9)–(C11), it follows that the block matrix of total immediate effects of a mutant's genotype on her phenotype satisfies Layer 3, Eq. 3.

Eq. (C8) gives the matrix of total effects of a mutant's  $i$ -th genotypic trait value at age  $a$  on her phenotype at age  $j$ . Then, it follows that the matrix of total effects of a mutant's genotypic traits for all genotypic traits at age  $a$  on her phenotype at age  $j$  is

$$\frac{d\mathbf{x}_j^\top}{d\mathbf{y}_a} \Bigg|_{\mathbf{y}=\bar{\mathbf{y}}} = \left( \frac{d\mathbf{x}_{j-1}^\top}{d\mathbf{y}_a} \frac{\delta \mathbf{x}_j^\top}{\delta \mathbf{x}_{j-1}} + \frac{d\mathbf{y}_{j-1}^\top}{d\mathbf{y}_a} \frac{\delta \mathbf{x}_j^\top}{\delta \mathbf{y}_{j-1}} \right) \Bigg|_{\mathbf{y}=\bar{\mathbf{y}}}. \quad (\text{C12})$$

Eq. (C12) is a recurrence equation for  $d\mathbf{x}_j^\top/d\mathbf{y}_a$  over age  $j \in \{2, \dots, N_a\}$ . Since a given entry of the operator  $d/d\mathbf{y}$  takes the total derivative with respect to a given  $y_{ia}$  while keeping all the other genotypic traits constant and genotypic traits are developmentally independent, a perturbation of an individual's genotypic trait value at a given age does not affect any other of the individual's genotypic trait value at the same or other ages (i.e.,  $d\mathbf{y}_a^\top/d\mathbf{y}_a = \mathbf{I}$  and  $d\mathbf{y}_j^\top/d\mathbf{y}_a = \mathbf{0}$  for  $j \neq a$ ). Thus, the matrix of total effects of a mutant's genotype on her genotype is

$$\frac{d\mathbf{y}^\top}{d\mathbf{y}} = \begin{pmatrix} \frac{d\mathbf{y}_1^\top}{d\mathbf{y}_1} & \cdots & \frac{d\mathbf{y}_{N_a}^\top}{d\mathbf{y}_1} \\ \vdots & \ddots & \vdots \\ \frac{d\mathbf{y}_1^\top}{d\mathbf{y}_{N_a}} & \cdots & \frac{d\mathbf{y}_{N_a}^\top}{d\mathbf{y}_{N_a}} \end{pmatrix} = \begin{pmatrix} \mathbf{I} & \mathbf{0} & \cdots & \mathbf{0} & \mathbf{0} \\ \mathbf{0} & \mathbf{I} & \cdots & \mathbf{0} & \mathbf{0} \\ \vdots & \vdots & \ddots & \vdots & \vdots \\ \mathbf{0} & \mathbf{0} & \cdots & \mathbf{I} & \mathbf{0} \\ \mathbf{0} & \mathbf{0} & \cdots & \mathbf{0} & \mathbf{I} \end{pmatrix}$$

$= \mathbf{I} \in \mathbb{R}^{N_a N_g \times N_a N_g}$ . (C13)

Moreover, because of the arrow of developmental time (due to the developmental constraint in Eq. 1), perturbations in an individual's late genotypic trait values do not affect the individual's early phenotype (i.e.,  $d\mathbf{x}_j^\top/d\mathbf{y}_a = \mathbf{0}$  for

1893  $j < a$  and  $j \in \{1, \dots, N_a - 1\}$ <sup>2</sup>. Additionally, from the arrow of developmental time (Eq. 1), a perturbation in an  
 1894 individual's genotypic trait values at a given age does not affect any of the individual's phenotypes at the *same* age  
 1895 (i.e.,  $\frac{dx_j^T}{dy_a} = \mathbf{0}$  for  $j = a$ ). Consequently, Eq. (C12) for  $j \in \{1, \dots, N_a\}$  reduces to

$$\frac{dx_j^T}{dy_a} \Big|_{y=\bar{y}} = \begin{cases} \left( \frac{dx_{j-1}^T}{dy_a} \frac{\delta x_j^T}{\delta x_{j-1}} + \underbrace{\frac{dy_{j-1}^T}{dy_a} \frac{\delta x_j^T}{\delta y_{j-1}}}_{\mathbf{0}, \text{ from (C13)}} \right) \Big|_{y=\bar{y}} & \text{for } j-1 > a \\ \left( \underbrace{\frac{dx_{j-1}^T}{dy_a} \frac{\delta x_j^T}{\delta x_{j-1}}}_{\mathbf{0}, \text{ from (1)}} + \underbrace{\frac{dy_{j-1}^T}{dy_a} \frac{\delta x_j^T}{\delta y_{j-1}}}_{\mathbf{I}, \text{ from (C13)}} \right) \Big|_{y=\bar{y}} & \text{for } j-1 = a \\ \left( \underbrace{\frac{dx_{j-1}^T}{dy_a} \frac{\delta x_j^T}{\delta x_{j-1}}}_{\mathbf{0}, \text{ from (1)}} + \underbrace{\frac{dy_{j-1}^T}{dy_a} \frac{\delta x_j^T}{\delta y_{j-1}}}_{\mathbf{0}, \text{ from (C13)}} \right) \Big|_{y=\bar{y}} & \text{for } j-1 < a. \end{cases}$$

1896 That is,

$$\frac{dx_j^T}{dy_a} \Big|_{y=\bar{y}} = \begin{cases} \left( \frac{dx_{j-1}^T}{dy_a} \frac{\delta x_j^T}{\delta x_{j-1}} \right) \Big|_{y=\bar{y}} & \text{for } j-1 > a \\ \frac{\delta x_j^T}{\delta y_{j-1}} \Big|_{y=\bar{y}} & \text{for } j-1 = a \\ \mathbf{0} & \text{for } j-1 < a. \end{cases}$$

1897 Expanding this recurrence yields

$$\frac{dx_j^T}{dy_a} \Big|_{y=\bar{y}} = \begin{cases} \left( \frac{dx_{a+1}^T}{dy_a} \frac{\delta x_{a+2}^T}{\delta x_{a+1}} \dots \frac{\delta x_j^T}{\delta x_{j-1}} \right) \Big|_{y=\bar{y}} & \text{for } j-1 > a \\ \frac{\delta x_{a+1}^T}{\delta y_a} \Big|_{y=\bar{y}} & \text{for } j-1 = a \\ \mathbf{0} & \text{for } j-1 < a. \end{cases} \quad (\text{C14})$$

1898 Evaluating Eq. (C14) at  $j = a + 1$  yields

$$\frac{dx_{a+1}^T}{dy_a} \Big|_{y=\bar{y}} = \frac{\delta x_{a+1}^T}{\delta y_a} \Big|_{y=\bar{y}},$$

<sup>2</sup>Again, we take the derivative  $dx_j^T/dy_{ia}$  as referring to the effect on  $x_j^T$  of a perturbation of the initial condition  $y_a$  of the difference equation (1) applied at the ages  $\{a, \dots, n\}$ . Hence, if  $j < a$ ,  $x_j^T$  is unmodified by a change in the initial condition of (1) applied at the ages  $\{a, \dots, n\}$ .

which substituted back in the top line of Eq. (C14) yields

1899

$$\frac{d\mathbf{x}_j^T}{dy_a} \Big|_{y=\bar{y}} = \begin{cases} \left( \frac{\delta\mathbf{x}_{a+1}^T}{\delta y_a} \frac{\delta\mathbf{x}_{a+2}^T}{\delta\mathbf{x}_{a+1}} \dots \frac{\delta\mathbf{x}_j^T}{\delta\mathbf{x}_{j-1}} \right) \Big|_{y=\bar{y}} & \text{for } j-1 > a \\ \frac{\delta\mathbf{x}_{a+1}^T}{\delta y_a} \Big|_{y=\bar{y}} & \text{for } j-1 = a \\ \mathbf{0} & \text{for } j-1 < a. \end{cases} \quad (\text{C15})$$

Hence, the block matrix of *total effects of a mutant's genotype on her phenotype* is

1900

$$\begin{aligned} \frac{d\mathbf{x}^T}{dy} \Big|_{y=\bar{y}} &= \begin{pmatrix} \frac{d\mathbf{x}_1^T}{dy_1} & \dots & \frac{d\mathbf{x}_{N_a}^T}{dy_1} \\ \vdots & \ddots & \vdots \\ \frac{d\mathbf{x}_1^T}{dy_{N_a}} & \dots & \frac{d\mathbf{x}_{N_a}^T}{dy_{N_a}} \end{pmatrix} \Big|_{y=\bar{y}} \\ &= \begin{pmatrix} \mathbf{0} & \frac{d\mathbf{x}_2^T}{dy_1} & \dots & \frac{d\mathbf{x}_{N_a-1}^T}{dy_1} & \frac{d\mathbf{x}_{N_a}^T}{dy_1} \\ \mathbf{0} & \mathbf{0} & \dots & \frac{d\mathbf{x}_{N_a-1}^T}{dy_2} & \frac{d\mathbf{x}_{N_a}^T}{dy_2} \\ \vdots & \vdots & \ddots & \vdots & \vdots \\ \mathbf{0} & \mathbf{0} & \dots & \mathbf{0} & \frac{d\mathbf{x}_{N_a}^T}{dy_{N_a-1}} \\ \mathbf{0} & \mathbf{0} & \dots & \mathbf{0} & \mathbf{0} \end{pmatrix} \Big|_{y=\bar{y}} \\ &\in \mathbb{R}^{N_a N_g \times N_a N_p}, \end{aligned} \quad (\text{C16})$$

whose  $a_j$ -th block entry is given by

1901

$$\begin{aligned} \frac{d\mathbf{x}_j^T}{dy_a} &= \begin{cases} \frac{\delta\mathbf{x}_{a+1}^T}{\delta y_a} \frac{d\mathbf{x}_j^T}{d\mathbf{x}_{a+1}} & \text{for } j > a \\ \mathbf{0} & \text{for } j \leq a \end{cases} \\ &= \begin{cases} \frac{\delta\mathbf{x}_{a+1}^T}{\delta y_a} \prod_{k=a+1}^{\widehat{j-1}} \frac{\delta\mathbf{x}_{k+1}^T}{\delta\mathbf{x}_k} & \text{for } j > a \\ \mathbf{0} & \text{for } j \leq a \end{cases} \\ &= \begin{cases} \frac{\delta\mathbf{x}_{a+1}^T}{\delta y_a} \frac{\delta\mathbf{x}_{a+2}^T}{\delta\mathbf{x}_{a+1}} \dots \frac{\delta\mathbf{x}_j^T}{\delta\mathbf{x}_{j-1}} & \text{for } j > a \\ \mathbf{0} & \text{for } j \leq a, \end{cases} \end{aligned} \quad (\text{C17})$$

where we use Layer 4, Eq. 2 and adopt the empty-product convention that

1902

$$\frac{d\mathbf{x}_{a+1}^T}{d\mathbf{x}_{a+1}} = \prod_{k=a+1}^{\widehat{a}} \frac{\delta\mathbf{x}_{k+1}^T}{\delta\mathbf{x}_k} = \mathbf{I}.$$

1903 Eqs. (C16) and (C17) write the matrix of total effects of a mutant's genotype on her phenotype in terms of partial  
 1904 derivatives, given Eq. (C9), as we sought.

1905 We now obtain a more compact expression for the matrix of total effects of a mutant's genotype on her phenotype  
 1906 in terms of partial derivatives. To do this, we note a relationship between the matrix of total effects of a mutant's  
 1907 genotype on her phenotype with the matrix of total effects of a mutant's phenotype on her phenotype. Note that the  
 1908  $a$ -th block entry of  $(\delta \mathbf{x}^\top / \delta \mathbf{y})(d\mathbf{x}^\top / d\mathbf{x})$  is

$$\begin{aligned} \left( \frac{\delta \mathbf{x}^\top}{\delta \mathbf{y}} \frac{d\mathbf{x}^\top}{d\mathbf{x}} \right)_{aj} &= \sum_{k=1}^{N_a} \frac{\delta \mathbf{x}_k^\top}{\delta y_a} \frac{d\mathbf{x}_j^\top}{d\mathbf{x}_k} \\ &= \frac{\delta \mathbf{x}_{a+1}^\top}{\delta y_a} \frac{d\mathbf{x}_j^\top}{d\mathbf{x}_{a+1}} \\ &= \frac{d\mathbf{x}_j^\top}{dy_a}, \end{aligned}$$

1909 where we use Eq. (C10) in the second equality and Eq. (C17) in the third equality, noting that  $d\mathbf{x}_j^\top / d\mathbf{x}_{a+1} = \mathbf{0}$  and  
 1910  $d\mathbf{x}_j^\top / dy_a = \mathbf{0}$  for  $j \leq a$ . Hence, Layer 4, Eq. 3 follows, which is a compact expression for the matrix of total effects of  
 1911 a mutant's genotype on her phenotype in terms of partial derivatives only, once Layer 4, Eq. 1 and Layer 3, Eq. 3 are  
 1912 used.

### 1913 *Appendix C.3. Conclusion*

#### 1914 *Appendix C.3.1. Form 1*

1915 Using Eqs. (C6), (C13), and Layer 3, Eq. 1 for  $\zeta \in \{\mathbf{x}, \mathbf{y}\}$ , we have that the total selection gradient of the genotype  
 1916 is

$$\left. \frac{dw}{dy} \right|_{y=\bar{y}} = \left[ \frac{d\mathbf{x}^\top}{dy} \left( \frac{\partial w}{\partial \mathbf{x}} + \frac{\partial \boldsymbol{\epsilon}^\top}{\partial \mathbf{x}} \frac{\partial w}{\partial \boldsymbol{\epsilon}} \right) + \frac{\partial w}{\partial \mathbf{y}} + \frac{\partial \boldsymbol{\epsilon}^\top}{\partial \mathbf{y}} \frac{\partial w}{\partial \boldsymbol{\epsilon}} \right] \Bigg|_{y=\bar{y}}.$$

1917 Thus, using Layer 4, Eq. 11 yields the first line of Layer 4, Eq. 22.

#### 1918 *Appendix C.3.2. Form 2*

1919 Using Eqs. (C6) and (C13), the total selection gradient of the genotype is given by the second line of Layer 4,  
 1920 Eq. 22.

#### 1921 *Appendix C.3.3. Form 3*

1922 Using Eqs. (C6), (B20), and Layer 4, Eq. 8, we have that the total selection gradient of the genotype is given by  
 1923 the third line of Layer 4, Eq. 22.

#### 1924 *Appendix C.3.4. Form 4*

1925 Using the first line of Layer 4, Eq. 22 and Layer 4, Eq. 15, we obtain the fourth line of Layer 4, Eq. 22.



### Appendix C.3.5. Form 5

1926

Finally, we can rearrange total genotypic selection (Layer 4, Eq. 22) in terms of total selection on the phenotype. Using Layer 4, Eq. 3 in the second line of Layer 4, Eq. 22, and then using the second line of Layer 4, Eq. 21, we have that the total selection gradient of the genotype is given by the fifth line of Layer 4, Eq. 22.

1927

1928

1929

## Appendix D. Total selection gradient of the environment

1930

Here proceed analogously to derive the total selection gradient of the environment, which allows us to write an equation describing the evolutionary dynamics of the geno-envo-phenotype.

1931

1932

### Appendix D.1. Total selection gradient of the environment in terms of direct fitness effects

1933

As before, we start by considering the total selection gradient entry for the  $i$ -th environmental trait at age  $a$ . By this, we mean the total selection gradient of a perturbation of  $\epsilon_{ia}$  taken as initial condition of the developmental constraint (1) when applied at the ages  $\{a, \dots, n\}$ . Consequently, an environmental perturbation at a given age does not affect the phenotype at earlier ages due to the arrow of developmental time. By letting  $\zeta$  in Eq. (S19) be  $\epsilon_{ia}$ , we have

1934

1935

1936

1937

$$\left. \frac{d\lambda}{d\epsilon_{ia}} \right|_{\mathbf{y}=\bar{\mathbf{y}}} = \left. \frac{dw}{d\epsilon_{ia}} \right|_{\mathbf{y}=\bar{\mathbf{y}}} = \sum_{j=1}^{N_a} \left. \frac{dw_j}{d\epsilon_{ia}} \right|_{\mathbf{y}=\bar{\mathbf{y}}}. \quad (\text{D1})$$

The total derivatives of a mutant's relative fitness at age  $j$  in Eq. (D1) are with respect to the individual's environmental traits at possibly another age  $a$ . We now seek to express such selection gradient in terms of partial derivatives only.

1938

1939

From Eq. (S17), we have  $w_j(\mathbf{z}_j, \boldsymbol{\epsilon}_j, \bar{\mathbf{m}})$  with  $\mathbf{z}_j = (\mathbf{x}_j; \mathbf{y}_j)$ , so applying the chain rule and, since we assume that genotypic traits are developmentally independent (hence, genotypic trait values do not depend on the environment, so  $d\mathbf{y}_j/d\epsilon_{ia} = \mathbf{0}$  for all  $i \in \{1, \dots, N_p\}$  and all  $a, j \in \{1, \dots, N_a\}$ ), we obtain

1940

1941

1942

$$\begin{aligned} \left. \frac{dw_j}{d\epsilon_{ia}} \right|_{\mathbf{y}=\bar{\mathbf{y}}} &= \left( \sum_{k=1}^{N_p} \frac{\partial w_j}{\partial x_{kj}} \frac{dx_{kj}}{d\epsilon_{ia}} + \sum_{k=1}^{N_e} \frac{\partial w_j}{\partial \epsilon_{kj}} \frac{d\epsilon_{kj}}{d\epsilon_{ia}} \right) \Bigg|_{\mathbf{y}=\bar{\mathbf{y}}} \\ &= \left( \frac{d\mathbf{x}_j^T}{d\epsilon_{ia}} \frac{\partial w_j}{\partial \mathbf{x}_j} + \frac{d\boldsymbol{\epsilon}_j^T}{d\epsilon_{ia}} \frac{\partial w_j}{\partial \boldsymbol{\epsilon}_j} \right) \Bigg|_{\mathbf{y}=\bar{\mathbf{y}}}. \end{aligned}$$

In the last equality we applied matrix calculus notation (Appendix A). Using Eq. (B3) we have

1943

$$\left. \frac{dw_j}{d\epsilon_{ia}} \right|_{\mathbf{y}=\bar{\mathbf{y}}} = \left( \frac{d\mathbf{x}_j^T}{d\epsilon_{ia}} \frac{\partial w}{\partial \mathbf{x}_j} + \frac{d\boldsymbol{\epsilon}_j^T}{d\epsilon_{ia}} \frac{\partial w}{\partial \boldsymbol{\epsilon}_j} \right) \Bigg|_{\mathbf{y}=\bar{\mathbf{y}}}. \quad (\text{D2})$$

Substituting Eq. (D2) in (D1) yields

1944

$$\begin{aligned} \left. \frac{dw}{d\epsilon_{ia}} \right|_{\mathbf{y}=\bar{\mathbf{y}}} &= \sum_{j=1}^{N_a} \left( \frac{d\mathbf{x}_j^T}{d\epsilon_{ia}} \frac{\partial w}{\partial \mathbf{x}_j} + \frac{d\boldsymbol{\epsilon}_j^T}{d\epsilon_{ia}} \frac{\partial w}{\partial \boldsymbol{\epsilon}_j} \right) \Bigg|_{\mathbf{y}=\bar{\mathbf{y}}} \\ &= \left( \frac{d\mathbf{x}^T}{d\epsilon_{ia}} \frac{\partial w}{\partial \mathbf{x}} + \frac{d\boldsymbol{\epsilon}^T}{d\epsilon_{ia}} \frac{\partial w}{\partial \boldsymbol{\epsilon}} \right) \Bigg|_{\mathbf{y}=\bar{\mathbf{y}}}. \end{aligned}$$

1945 Therefore, the total selection gradient of all environmental traits across all ages is

$$\frac{dw}{d\boldsymbol{\epsilon}} \Big|_{\mathbf{y}=\bar{\mathbf{y}}} = \left( \frac{d\mathbf{x}^\top}{d\boldsymbol{\epsilon}} \frac{\partial w}{\partial \mathbf{x}} + \frac{d\boldsymbol{\epsilon}^\top}{d\boldsymbol{\epsilon}} \frac{\partial w}{\partial \boldsymbol{\epsilon}} \right) \Big|_{\mathbf{y}=\bar{\mathbf{y}}} \in \mathbb{R}^{N_a N_c \times 1}, \quad (\text{D3})$$

1946 where we use the block matrix of *total effects of a mutant's environment on her phenotype*

$$\frac{d\mathbf{x}^\top}{d\boldsymbol{\epsilon}} \Big|_{\mathbf{y}=\bar{\mathbf{y}}} \equiv \left( \begin{array}{ccc} \frac{d\mathbf{x}_1^\top}{d\boldsymbol{\epsilon}_1} & \dots & \frac{d\mathbf{x}_{N_a}^\top}{d\boldsymbol{\epsilon}_{N_a}} \\ \vdots & \ddots & \vdots \\ \frac{d\mathbf{x}_1^\top}{d\boldsymbol{\epsilon}_{N_a}} & \dots & \frac{d\mathbf{x}_{N_a}^\top}{d\boldsymbol{\epsilon}_{N_a}} \end{array} \right) \Big|_{\mathbf{y}=\bar{\mathbf{y}}} \in \mathbb{R}^{N_a N_p \times N_a N_c}$$

1947 and the block matrix of *total effects of a mutant's environment on her environment*

$$\frac{d\boldsymbol{\epsilon}^\top}{d\boldsymbol{\epsilon}} \Big|_{\mathbf{y}=\bar{\mathbf{y}}} \equiv \left( \begin{array}{ccc} \frac{d\boldsymbol{\epsilon}_1^\top}{d\boldsymbol{\epsilon}_1} & \dots & \frac{d\boldsymbol{\epsilon}_{N_a}^\top}{d\boldsymbol{\epsilon}_{N_a}} \\ \vdots & \ddots & \vdots \\ \frac{d\boldsymbol{\epsilon}_1^\top}{d\boldsymbol{\epsilon}_{N_a}} & \dots & \frac{d\boldsymbol{\epsilon}_{N_a}^\top}{d\boldsymbol{\epsilon}_{N_a}} \end{array} \right) \Big|_{\mathbf{y}=\bar{\mathbf{y}}} \in \mathbb{R}^{N_a N_c \times N_a N_c}.$$

1948 Expression (D3) is now in terms of partial derivatives of fitness, total effects of a mutant's environment on her phe-  
 1949 notype,  $d\mathbf{x}^\top/d\boldsymbol{\epsilon}$ , and total effects of a mutant's environment on her environment,  $d\boldsymbol{\epsilon}^\top/d\boldsymbol{\epsilon}$ . We now proceed to write  
 1950  $d\mathbf{x}^\top/d\boldsymbol{\epsilon}$  and  $d\boldsymbol{\epsilon}^\top/d\boldsymbol{\epsilon}$  in terms of partial derivatives only.

#### 1951 Appendix D.2. Matrix of total effects of a mutant's environment on her environment

1952 From the environmental constraint (2) for the  $k$ -th environmental trait at age  $j \in \{1, \dots, N_a\}$  we have that  $\epsilon_{kj} =$   
 1953  $h_{kj}(\mathbf{z}_j, \bar{\mathbf{z}}, \boldsymbol{\tau})$ , so using the chain rule since genotypic traits are developmentally independent yields

$$\frac{d\epsilon_{kj}}{d\epsilon_{ia}} \Big|_{\mathbf{y}=\bar{\mathbf{y}}} = \begin{cases} \left( \sum_{l=1}^{N_p} \frac{\partial h_{kj}}{\partial x_{lj}} \frac{dx_{lj}}{d\epsilon_{ia}} \right) \Big|_{\mathbf{y}=\bar{\mathbf{y}}} & \text{for } j > a \\ \frac{\partial \epsilon_{kj}}{\partial \epsilon_{ia}} \Big|_{\mathbf{y}=\bar{\mathbf{y}}} & \text{for } j = a \\ 0 & \text{for } j < a \end{cases}$$

$$= \begin{cases} \left( \frac{d\mathbf{x}_j^\top}{d\epsilon_{ia}} \frac{\partial \epsilon_{kj}}{\partial \mathbf{x}_j} \right) \Big|_{\mathbf{y}=\bar{\mathbf{y}}} & \text{for } j > a \\ \frac{\partial \epsilon_{kj}}{\partial \epsilon_{ia}} \Big|_{\mathbf{y}=\bar{\mathbf{y}}} & \text{for } j = a \\ 0 & \text{for } j < a. \end{cases}$$

1954 In the last equality we used matrix calculus notation and rewrote  $h_{kj}$  as  $\epsilon_{kj}$ . Since we assume that environmental traits  
 1955 are mutually independent, we have that  $\partial \epsilon_{ka}/\partial \epsilon_{ia} = 1$  if  $i = k$  or  $\partial \epsilon_{ka}/\partial \epsilon_{ia} = 0$  otherwise; however, we leave the partial

derivatives  $\partial\epsilon_{ka}/\partial\epsilon_{ia}$  unevaluated as it is conceptually useful. Hence,

1956

$$\left. \frac{d\boldsymbol{\epsilon}_j^T}{d\epsilon_{ia}} \right|_{y=\bar{y}} = \begin{cases} \left( \frac{d\mathbf{x}_j^T}{d\epsilon_{ia}} \frac{\partial\boldsymbol{\epsilon}_j^T}{\partial\mathbf{x}_j} \right) \Big|_{y=\bar{y}} & \text{for } j > a \\ \frac{\partial\boldsymbol{\epsilon}_j^T}{\partial\epsilon_{ia}} \Big|_{y=\bar{y}} & \text{for } j = a \\ \mathbf{0} & \text{for } j < a. \end{cases}$$

Then, the matrix of total effects of a mutant's environment at age  $a$  on her environment at age  $j$  is

1957

$$\left. \frac{d\boldsymbol{\epsilon}_j^T}{d\boldsymbol{\epsilon}_a} \right|_{y=\bar{y}} = \begin{cases} \left( \frac{d\mathbf{x}_j^T}{d\boldsymbol{\epsilon}_a} \frac{\partial\boldsymbol{\epsilon}_j^T}{\partial\mathbf{x}_j} \right) \Big|_{y=\bar{y}} & \text{for } j > a \\ \frac{\partial\boldsymbol{\epsilon}_j^T}{\partial\boldsymbol{\epsilon}_a} \Big|_{y=\bar{y}} & \text{for } j = a \\ \mathbf{0} & \text{for } j < a. \end{cases} \quad (\text{D4})$$

Hence, the block matrix of *total effects of a mutant's environment on her environment* is

1958

$$\begin{aligned} \left. \frac{d\boldsymbol{\epsilon}^T}{d\boldsymbol{\epsilon}} \right|_{y=\bar{y}} &\equiv \left( \begin{array}{ccc} \frac{d\boldsymbol{\epsilon}_1^T}{d\boldsymbol{\epsilon}_1} & \cdots & \frac{d\boldsymbol{\epsilon}_{N_a}^T}{d\boldsymbol{\epsilon}_1} \\ \vdots & \ddots & \vdots \\ \frac{d\boldsymbol{\epsilon}_1^T}{d\boldsymbol{\epsilon}_{N_a}} & \cdots & \frac{d\boldsymbol{\epsilon}_{N_a}^T}{d\boldsymbol{\epsilon}_{N_a}} \end{array} \right) \Big|_{y=\bar{y}} \\ &= \left( \begin{array}{ccccc} \frac{\partial\boldsymbol{\epsilon}_1^T}{\partial\boldsymbol{\epsilon}_1} & \frac{d\boldsymbol{\epsilon}_2^T}{d\boldsymbol{\epsilon}_1} & \cdots & \frac{d\boldsymbol{\epsilon}_{N_a-1}^T}{d\boldsymbol{\epsilon}_1} & \frac{d\boldsymbol{\epsilon}_{N_a}^T}{d\boldsymbol{\epsilon}_1} \\ \mathbf{0} & \frac{\partial\boldsymbol{\epsilon}_2^T}{\partial\boldsymbol{\epsilon}_2} & \cdots & \frac{d\boldsymbol{\epsilon}_{N_a-1}^T}{d\boldsymbol{\epsilon}_2} & \frac{d\boldsymbol{\epsilon}_{N_a}^T}{d\boldsymbol{\epsilon}_2} \\ \vdots & \vdots & \ddots & \vdots & \vdots \\ \mathbf{0} & \mathbf{0} & \cdots & \frac{\partial\boldsymbol{\epsilon}_{N_a-1}^T}{\partial\boldsymbol{\epsilon}_{N_a-1}} & \frac{d\boldsymbol{\epsilon}_{N_a}^T}{d\boldsymbol{\epsilon}_{N_a-1}} \\ \mathbf{0} & \mathbf{0} & \cdots & \mathbf{0} & \frac{\partial\boldsymbol{\epsilon}_{N_a}^T}{\partial\boldsymbol{\epsilon}_{N_a}} \end{array} \right) \Big|_{y=\bar{y}} \\ &\in \mathbb{R}^{N_a N_e \times N_a N_e}. \end{aligned} \quad (\text{D5})$$

Note that the  $aj$ -th block entry of  $(d\mathbf{x}^T/d\boldsymbol{\epsilon})(\partial\boldsymbol{\epsilon}^T/\partial\mathbf{x})$  for  $j > a$  is

1959

$$\left( \frac{d\mathbf{x}^T}{d\boldsymbol{\epsilon}} \frac{\partial\boldsymbol{\epsilon}^T}{\partial\mathbf{x}} \right)_{aj} = \sum_{k=1}^{N_a} \frac{d\mathbf{x}_k^T}{d\boldsymbol{\epsilon}_a} \frac{\partial\boldsymbol{\epsilon}_j^T}{\partial\mathbf{x}_k} = \frac{d\mathbf{x}_j^T}{d\boldsymbol{\epsilon}_a} \frac{\partial\boldsymbol{\epsilon}_j^T}{\partial\mathbf{x}_j},$$

where we use Layer 2, Eq. 2d in the second equality. Note also that since environmental traits are mutually inde-

1960

pendent,  $\partial\boldsymbol{\epsilon}_j^T/\partial\boldsymbol{\epsilon}_a = \mathbf{0}$  for  $j \neq a$  from the environmental constraint (2). Finally, note that because of the arrow of

1961

developmental time,  $\partial\mathbf{x}_j^T/\partial\boldsymbol{\epsilon}_a = \mathbf{0}$  for  $j < a$  due to the developmental constraint (1). Hence, Layer 4, Eq. 13 follows,

1962

which is a compact expression for the matrix of total effects of a mutant's environment on itself in terms of partial

1963

1964 derivatives and the total effects of a mutant's environment on her phenotype, which we now write in terms of partial  
1965 derivatives only.

1966 *Appendix D.3. Matrix of total effects of a mutant's environment on her phenotype*

1967 From the developmental constraint (1) for the  $k$ -th phenotype at age  $j \in \{2, \dots, N_a\}$  we have that  $x_{kj} =$   
1968  $g_{k,j-1}(\mathbf{z}_{j-1}, \boldsymbol{\epsilon}_{j-1}, \bar{\mathbf{z}})$ , so using the chain rule and since genotypic traits are developmentally independent yields

$$\begin{aligned} \left. \frac{dx_{kj}}{d\epsilon_{ia}} \right|_{\mathbf{y}=\bar{\mathbf{y}}} &= \left( \sum_{l=1}^{N_p} \frac{\partial g_{k,j-1}}{\partial x_{l,j-1}} \frac{dx_{l,j-1}}{d\epsilon_{ia}} + \sum_{l=1}^{N_e} \frac{\partial g_{k,j-1}}{\partial \epsilon_{l,j-1}} \frac{d\epsilon_{l,j-1}}{d\epsilon_{ia}} \right) \Bigg|_{\mathbf{y}=\bar{\mathbf{y}}} \\ &= \left( \frac{d\mathbf{x}_{j-1}^\top}{d\epsilon_{ia}} \frac{\partial x_{kj}}{\partial \mathbf{x}_{j-1}} + \frac{d\boldsymbol{\epsilon}_{j-1}^\top}{d\epsilon_{ia}} \frac{\partial x_{kj}}{\partial \boldsymbol{\epsilon}_{j-1}} \right) \Bigg|_{\mathbf{y}=\bar{\mathbf{y}}}. \end{aligned}$$

1969 In the last equality we used matrix calculus notation and rewrote  $g_{k,j-1}$  as  $x_{kj}$ . Hence,

$$\left. \frac{d\mathbf{x}_j^\top}{d\epsilon_{ia}} \right|_{\mathbf{y}=\bar{\mathbf{y}}} = \left( \frac{d\mathbf{x}_{j-1}^\top}{d\epsilon_{ia}} \frac{\partial \mathbf{x}_j^\top}{\partial \mathbf{x}_{j-1}} + \frac{d\boldsymbol{\epsilon}_{j-1}^\top}{d\epsilon_{ia}} \frac{\partial \mathbf{x}_j^\top}{\partial \boldsymbol{\epsilon}_{j-1}} \right) \Bigg|_{\mathbf{y}=\bar{\mathbf{y}}}.$$

1970 Then, the matrix of total effects of a mutant's environment at age  $a$  on her phenotype at age  $j$  is

$$\left. \frac{d\mathbf{x}_j^\top}{d\boldsymbol{\epsilon}_a} \right|_{\mathbf{y}=\bar{\mathbf{y}}} = \left( \frac{d\mathbf{x}_{j-1}^\top}{d\boldsymbol{\epsilon}_a} \frac{\partial \mathbf{x}_j^\top}{\partial \mathbf{x}_{j-1}} + \frac{d\boldsymbol{\epsilon}_{j-1}^\top}{d\boldsymbol{\epsilon}_a} \frac{\partial \mathbf{x}_j^\top}{\partial \boldsymbol{\epsilon}_{j-1}} \right) \Bigg|_{\mathbf{y}=\bar{\mathbf{y}}}.$$

1971 Using Eq. (D4) yields

$$\begin{aligned} \left. \frac{d\mathbf{x}_j^\top}{d\boldsymbol{\epsilon}_a} \right|_{\mathbf{y}=\bar{\mathbf{y}}} &= \\ &\begin{cases} \left( \frac{d\mathbf{x}_{j-1}^\top}{d\boldsymbol{\epsilon}_a} \frac{\partial \mathbf{x}_j^\top}{\partial \mathbf{x}_{j-1}} + \frac{d\boldsymbol{\epsilon}_{j-1}^\top}{d\boldsymbol{\epsilon}_a} \frac{\partial \mathbf{x}_j^\top}{\partial \boldsymbol{\epsilon}_{j-1}} \right) \Bigg|_{\mathbf{y}=\bar{\mathbf{y}}} & \text{for } j-1 > a \\ \left( \underbrace{\frac{d\mathbf{x}_a^\top}{d\boldsymbol{\epsilon}_a}}_{\mathbf{0}, \text{ from (1)}} \frac{\partial \mathbf{x}_{a+1}^\top}{\partial \mathbf{x}_a} + \frac{d\boldsymbol{\epsilon}_a^\top}{d\boldsymbol{\epsilon}_a} \frac{\partial \mathbf{x}_{a+1}^\top}{\partial \boldsymbol{\epsilon}_a} \right) \Bigg|_{\mathbf{y}=\bar{\mathbf{y}}} & \text{for } j-1 = a \\ \left( \underbrace{\frac{d\mathbf{x}_{j-1}^\top}{d\boldsymbol{\epsilon}_a}}_{\mathbf{0}, \text{ from (1)}} \frac{\partial \mathbf{x}_j^\top}{\partial \mathbf{x}_{j-1}} \right) \Bigg|_{\mathbf{y}=\bar{\mathbf{y}}} & \text{for } j-1 > a \\ \left( \frac{d\mathbf{x}_{j-1}^\top}{d\boldsymbol{\epsilon}_a} \left( \frac{\partial \mathbf{x}_j^\top}{\partial \mathbf{x}_{j-1}} + \frac{d\boldsymbol{\epsilon}_{j-1}^\top}{d\boldsymbol{\epsilon}_a} \frac{\partial \mathbf{x}_j^\top}{\partial \boldsymbol{\epsilon}_{j-1}} \right) \right) \Bigg|_{\mathbf{y}=\bar{\mathbf{y}}} & \text{for } j-1 > a \\ \left( \frac{d\boldsymbol{\epsilon}_a^\top}{d\boldsymbol{\epsilon}_a} \frac{\partial \mathbf{x}_j^\top}{\partial \boldsymbol{\epsilon}_{j-1}} \right) \Bigg|_{\mathbf{y}=\bar{\mathbf{y}}} & \text{for } j-1 = a \\ \mathbf{0} & \text{for } j-1 > a. \end{cases} \end{aligned}$$

Using Eq. (B10), this reduces to

1972

$$\frac{d\mathbf{x}_j^\top}{d\boldsymbol{\epsilon}_a} \Big|_{y=\bar{y}} = \begin{cases} \left( \frac{d\mathbf{x}_{j-1}^\top}{d\boldsymbol{\epsilon}_a} \frac{\delta\mathbf{x}_j^\top}{\delta\mathbf{x}_{j-1}} \right) \Big|_{y=\bar{y}} & \text{for } j-1 > a \\ \left( \frac{\partial\boldsymbol{\epsilon}_a^\top}{\partial\boldsymbol{\epsilon}_a} \frac{\partial\mathbf{x}_{a+1}^\top}{\partial\boldsymbol{\epsilon}_a} \right) \Big|_{y=\bar{y}} & \text{for } j-1 = a \\ \mathbf{0} & \text{for } j-1 < a. \end{cases}$$

Expanding this recurrence yields

1973

$$\frac{d\mathbf{x}_j^\top}{d\boldsymbol{\epsilon}_a} \Big|_{y=\bar{y}} = \begin{cases} \left( \frac{d\mathbf{x}_{a+1}^\top}{d\boldsymbol{\epsilon}_a} \frac{\delta\mathbf{x}_{a+2}^\top}{\delta\mathbf{x}_{a+1}} \dots \frac{\delta\mathbf{x}_j^\top}{\delta\mathbf{x}_{j-1}} \right) \Big|_{y=\bar{y}} & \text{for } j-1 > a \\ \left( \frac{\partial\boldsymbol{\epsilon}_a^\top}{\partial\boldsymbol{\epsilon}_a} \frac{\partial\mathbf{x}_{a+1}^\top}{\partial\boldsymbol{\epsilon}_a} \right) \Big|_{y=\bar{y}} & \text{for } j-1 = a \\ \mathbf{0} & \text{for } j-1 < a, \end{cases}$$

which using Layer 4, Eq. 2 yields

1974

$$\frac{d\mathbf{x}_j^\top}{d\boldsymbol{\epsilon}_a} \Big|_{y=\bar{y}} = \begin{cases} \left( \frac{\partial\boldsymbol{\epsilon}_a^\top}{\partial\boldsymbol{\epsilon}_a} \frac{\partial\mathbf{x}_{a+1}^\top}{\partial\boldsymbol{\epsilon}_a} \frac{d\mathbf{x}_j^\top}{d\mathbf{x}_{a+1}} \right) \Big|_{y=\bar{y}} & \text{for } j-1 > a \\ \left( \frac{\partial\boldsymbol{\epsilon}_a^\top}{\partial\boldsymbol{\epsilon}_a} \frac{\partial\mathbf{x}_{a+1}^\top}{\partial\boldsymbol{\epsilon}_a} \right) \Big|_{y=\bar{y}} & \text{for } j-1 = a \\ \mathbf{0} & \text{for } j-1 < a. \end{cases} \quad (\text{D6})$$

It will be useful to denote the matrix of *total immediate effects of a mutant's environment at age  $j$  on her phenotype at age  $j$*  for  $j > 0$  as

1975

1976

$$\frac{\delta\mathbf{x}_j^\top}{\delta\boldsymbol{\epsilon}_{j-1}} \Big|_{y=\bar{y}} = \frac{\partial\boldsymbol{\epsilon}_{j-1}^\top}{\partial\boldsymbol{\epsilon}_{j-1}} \frac{\partial\mathbf{x}_j^\top}{\partial\boldsymbol{\epsilon}_{j-1}} \Big|_{y=\bar{y}} \in \mathbb{R}^{N_e \times N_p}. \quad (\text{D7})$$

The matrix of *direct effects of a mutant's environment on itself* is given by Layer 2, Eq. 3. In turn, the block matrix of *total immediate effects of a mutant's environment on her phenotype* is

1977

1978

$$\frac{\delta\mathbf{x}^\top}{\delta\boldsymbol{\epsilon}} \Big|_{y=\bar{y}} \equiv \begin{pmatrix} \frac{\delta\mathbf{x}_1^\top}{\delta\boldsymbol{\epsilon}_1} & \dots & \frac{\delta\mathbf{x}_{N_a}^\top}{\delta\boldsymbol{\epsilon}_1} \\ \vdots & \ddots & \vdots \\ \frac{\delta\mathbf{x}_1^\top}{\delta\boldsymbol{\epsilon}_{N_a}} & \dots & \frac{\delta\mathbf{x}_{N_a}^\top}{\delta\boldsymbol{\epsilon}_{N_a}} \end{pmatrix} \Big|_{y=\bar{y}} \\ = \begin{pmatrix} \mathbf{0} & \frac{\delta\mathbf{x}_2^\top}{\delta\boldsymbol{\epsilon}_1} & \dots & \mathbf{0} & \mathbf{0} \\ \mathbf{0} & \mathbf{0} & \dots & \mathbf{0} & \mathbf{0} \\ \vdots & \vdots & \ddots & \vdots & \vdots \\ \mathbf{0} & \mathbf{0} & \dots & \mathbf{0} & \frac{\delta\mathbf{x}_{N_a}^\top}{\delta\boldsymbol{\epsilon}_{N_a-1}} \\ \mathbf{0} & \mathbf{0} & \dots & \mathbf{0} & \mathbf{0} \end{pmatrix} \Big|_{y=\bar{y}}$$

$$\in \mathbb{R}^{N_a N_c \times N_a N_p}, \quad (\text{D8})$$

1979 so Layer 3, Eq. 4 follows from Eqs. (D7), Layer 2, Eq. 3, and Layer 2, Eq. 2c.

1980 Using Eq. (D7), Eq. (D6) becomes

$$\frac{d\mathbf{x}_j^\top}{d\boldsymbol{\epsilon}_a} \Big|_{y=\bar{y}} = \begin{cases} \left( \frac{\delta\mathbf{x}_{a+1}^\top}{\delta\boldsymbol{\epsilon}_a} \frac{d\mathbf{x}_j^\top}{d\mathbf{x}_{a+1}} \right) \Big|_{y=\bar{y}} & \text{for } j-1 > a \\ \frac{\delta\mathbf{x}_{a+1}^\top}{\delta\boldsymbol{\epsilon}_a} \Big|_{y=\bar{y}} & \text{for } j-1 = a \\ \mathbf{0} & \text{for } j-1 < a. \end{cases}$$

1981 Note that the  $aj$ -th entry of  $(\delta\mathbf{x}^\top/\delta\boldsymbol{\epsilon})(d\mathbf{x}^\top/d\mathbf{x})$  is

$$\left( \frac{\delta\mathbf{x}^\top}{\delta\boldsymbol{\epsilon}} \right)_{aj} = \sum_{k=1}^{N_a} \frac{\delta\mathbf{x}_k^\top}{\delta\boldsymbol{\epsilon}_a} \frac{d\mathbf{x}_j^\top}{d\mathbf{x}_k} = \frac{\delta\mathbf{x}_{a+1}^\top}{\delta\boldsymbol{\epsilon}_a} \frac{d\mathbf{x}_j^\top}{d\mathbf{x}_{a+1}} = \frac{d\mathbf{x}_j^\top}{d\boldsymbol{\epsilon}_a}, \quad (\text{D9})$$

1982 where we use Eq. (D8) in the second equality. Hence, Layer 4, Eq. 4 follows, where the block matrix of *total effects*  
1983 *of a mutant's environment on her phenotype* is

$$\begin{aligned} \frac{d\mathbf{x}^\top}{d\boldsymbol{\epsilon}} \Big|_{y=\bar{y}} &= \left( \begin{array}{ccc} \frac{d\mathbf{x}_1^\top}{d\boldsymbol{\epsilon}_1} & \dots & \frac{d\mathbf{x}_{N_a}^\top}{d\boldsymbol{\epsilon}_1} \\ \vdots & \ddots & \vdots \\ \frac{d\mathbf{x}_1^\top}{d\boldsymbol{\epsilon}_{N_a}} & \dots & \frac{d\mathbf{x}_{N_a}^\top}{d\boldsymbol{\epsilon}_{N_a}} \end{array} \right) \Big|_{y=\bar{y}} \\ &= \left( \begin{array}{ccccc} \mathbf{0} & \frac{d\mathbf{x}_2^\top}{d\boldsymbol{\epsilon}_1} & \dots & \frac{d\mathbf{x}_{N_a-1}^\top}{d\boldsymbol{\epsilon}_1} & \frac{d\mathbf{x}_{N_a}^\top}{d\boldsymbol{\epsilon}_1} \\ \mathbf{0} & \mathbf{0} & \dots & \frac{d\mathbf{x}_{N_a-1}^\top}{d\boldsymbol{\epsilon}_2} & \frac{d\mathbf{x}_{N_a}^\top}{d\boldsymbol{\epsilon}_2} \\ \vdots & \vdots & \ddots & \vdots & \vdots \\ \mathbf{0} & \mathbf{0} & \dots & \mathbf{0} & \frac{d\mathbf{x}_{N_a}^\top}{d\boldsymbol{\epsilon}_{N_a-1}} \\ \mathbf{0} & \mathbf{0} & \dots & \mathbf{0} & \mathbf{0} \end{array} \right) \Big|_{y=\bar{y}} \\ &\in \mathbb{R}^{N_a N_c \times N_a N_p}. \end{aligned} \quad (\text{D10})$$

1984 Layer 4, Eq. 4, (D8), and Layer 4, Eq. 1 write the matrix of total effects of a mutant's environment on her phenotype  
1985 in terms of partial derivatives. This is a compact expression for the matrix of total effects of a mutant's environment  
1986 on her phenotype in terms of partial derivatives only.

1987 *Appendix D.4. Conclusion*

1988 *Appendix D.4.1. Form 1*

1989 Eq. (D3) gives the total selection gradient of the environment as in the first line of Layer 4, Eq. 23.

*Appendix D.4.2. Form 2*

Using Eq. (D3) and Layer 4, Eq. 13 yields

$$\left. \frac{dw}{d\boldsymbol{\epsilon}} \right|_{\mathbf{y}=\bar{\mathbf{y}}} = \left[ \frac{d\mathbf{x}^T}{d\boldsymbol{\epsilon}} \frac{\partial w}{\partial \mathbf{x}} + \left( \frac{\partial \boldsymbol{\epsilon}^T}{\partial \boldsymbol{\epsilon}} + \frac{d\mathbf{x}^T}{d\boldsymbol{\epsilon}} \frac{\partial \boldsymbol{\epsilon}^T}{\partial \mathbf{x}} \right) \frac{\partial w}{\partial \boldsymbol{\epsilon}} \right] \Big|_{\mathbf{y}=\bar{\mathbf{y}}}.$$

Collecting for  $d\mathbf{x}^T/d\boldsymbol{\epsilon}$  and using Layer 3, Eq. 1 for  $\zeta = \mathbf{x}$  as well as Layer 3, Eq. 2, we have that the total selection gradient of the environment is given by the second line of Layer 4, Eq. 23.

*Appendix D.4.3. Form 3*

Using the first line of Layer 4, Eq. 23 and Layer 4, Eq. 16, we obtain the third line of Layer 4, Eq. 23.

*Appendix D.4.4. Form 4*

Finally, we can rearrange total selection on the environment in terms of total selection on the phenotype. Using Layer 4, Eq. 4 in the second line of Layer 4, Eq. 23, and then using the second line of Layer 4, Eq. 21, we have that the total selection gradient of the environment is given by the fourth line of Layer 4, Eq. 23.

**Appendix E. Total selection gradient of the geno-phenotype**

We have that the mutant geno-phenotype is  $\mathbf{z} = (\mathbf{x}; \mathbf{y})$ . We first define the (direct), total immediate, and total selection gradients of the geno-phenotype and write the total selection gradient of the geno-phenotype in terms of the total immediate selection gradient of the geno-phenotype and of the partial selection gradient of the geno-environment.

*Appendix E.1. Total selection gradient of the geno-phenotype in terms of direct fitness effects*

We have the *selection gradient of the geno-phenotype*

$$\left. \frac{\partial w}{\partial \mathbf{z}} \right|_{\mathbf{y}=\bar{\mathbf{y}}} \equiv \left( \frac{\partial w}{\partial \mathbf{x}}; \frac{\partial w}{\partial \mathbf{y}} \right) \Big|_{\mathbf{y}=\bar{\mathbf{y}}} \in \mathbb{R}^{N_a(N_p+N_g) \times 1},$$

the *total immediate selection gradient of the geno-phenotype*

$$\left. \frac{\delta w}{\delta \mathbf{z}} \right|_{\mathbf{y}=\bar{\mathbf{y}}} \equiv \left( \frac{\delta w}{\delta \mathbf{x}}; \frac{\delta w}{\delta \mathbf{y}} \right) \Big|_{\mathbf{y}=\bar{\mathbf{y}}} \in \mathbb{R}^{N_a(N_p+N_g) \times 1},$$

and the *total selection gradient of the geno-phenotype*

$$\left. \frac{dw}{d\mathbf{z}} \right|_{\mathbf{y}=\bar{\mathbf{y}}} \equiv \left( \frac{dw}{d\mathbf{x}}; \frac{dw}{d\mathbf{y}} \right) \Big|_{\mathbf{y}=\bar{\mathbf{y}}} \in \mathbb{R}^{N_a(N_p+N_g) \times 1}.$$

Now, we write the total immediate selection gradient of the geno-phenotype as a linear combination of the selection gradients of the geno-phenotype and environment. Using Layer 3, Eq. 1 for  $\zeta \in \{\mathbf{x}, \mathbf{y}\}$ , we have that the total immediate

2011 selection gradient of the geno-phenotype is

$$\begin{aligned} \frac{\delta w}{\delta \mathbf{z}} \Big|_{\mathbf{y}=\bar{\mathbf{y}}} &\equiv \begin{pmatrix} \frac{\delta w}{\delta \mathbf{x}} \\ \frac{\delta w}{\delta \mathbf{y}} \end{pmatrix} \Big|_{\mathbf{y}=\bar{\mathbf{y}}} = \begin{pmatrix} \frac{\partial w}{\partial \mathbf{x}} + \frac{\partial \boldsymbol{\epsilon}^T}{\partial \mathbf{x}} \frac{\partial w}{\partial \boldsymbol{\epsilon}} \\ \frac{\partial w}{\partial \mathbf{y}} + \frac{\partial \boldsymbol{\epsilon}^T}{\partial \mathbf{y}} \frac{\partial w}{\partial \boldsymbol{\epsilon}} \end{pmatrix} \Big|_{\mathbf{y}=\bar{\mathbf{y}}} \\ &= \begin{pmatrix} \frac{\partial w}{\partial \mathbf{x}} \\ \frac{\partial w}{\partial \mathbf{y}} \end{pmatrix} + \begin{pmatrix} \frac{\partial \boldsymbol{\epsilon}^T}{\partial \mathbf{x}} \frac{\partial w}{\partial \boldsymbol{\epsilon}} \\ \frac{\partial \boldsymbol{\epsilon}^T}{\partial \mathbf{y}} \frac{\partial w}{\partial \boldsymbol{\epsilon}} \end{pmatrix} \Big|_{\mathbf{y}=\bar{\mathbf{y}}} . \end{aligned} \quad (\text{E1})$$

2012 Using Layer 2, Eq. 7, we have that

$$\begin{pmatrix} \frac{\partial \boldsymbol{\epsilon}^T}{\partial \mathbf{z}} \frac{\partial w}{\partial \boldsymbol{\epsilon}} \end{pmatrix} \Big|_{\mathbf{y}=\bar{\mathbf{y}}} = \begin{pmatrix} \begin{pmatrix} \frac{\partial \boldsymbol{\epsilon}^T}{\partial \mathbf{x}} \\ \frac{\partial \boldsymbol{\epsilon}^T}{\partial \mathbf{y}} \end{pmatrix} \frac{\partial w}{\partial \boldsymbol{\epsilon}} \end{pmatrix} \Big|_{\mathbf{y}=\bar{\mathbf{y}}} = \begin{pmatrix} \frac{\partial \boldsymbol{\epsilon}^T}{\partial \mathbf{x}} \frac{\partial w}{\partial \boldsymbol{\epsilon}} \\ \frac{\partial \boldsymbol{\epsilon}^T}{\partial \mathbf{y}} \frac{\partial w}{\partial \boldsymbol{\epsilon}} \end{pmatrix} \Big|_{\mathbf{y}=\bar{\mathbf{y}}} .$$

2013 Therefore, Eq. (E1) becomes Layer 3, Eq. 1 for  $\boldsymbol{\zeta} = \mathbf{z}$ .

#### 2014 *Appendix E.1.1. Form 2*

2015 Now we bring together the total selection gradients of the phenotype and genotype to write the total selection  
2016 gradient of the geno-phenotype as a linear transformation of the total immediate selection gradient of the geno-  
2017 phenotype.

2018 Using the third lines of Layer 4, Eq. 21 and Layer 4, Eq. 22, we have

$$\begin{aligned} \frac{dw}{d\mathbf{z}} \Big|_{\mathbf{y}=\bar{\mathbf{y}}} &\equiv \begin{pmatrix} \frac{dw}{d\mathbf{x}} \\ \frac{dw}{d\mathbf{y}} \end{pmatrix} \Big|_{\mathbf{y}=\bar{\mathbf{y}}} = \begin{pmatrix} \frac{d\mathbf{z}^T}{d\mathbf{x}} \frac{\delta w}{\delta \mathbf{z}} \\ \frac{d\mathbf{z}^T}{d\mathbf{y}} \frac{\delta w}{\delta \mathbf{z}} \end{pmatrix} \Big|_{\mathbf{y}=\bar{\mathbf{y}}} \\ &= \begin{pmatrix} \begin{pmatrix} \frac{d\mathbf{z}^T}{d\mathbf{x}} \\ \frac{d\mathbf{z}^T}{d\mathbf{y}} \end{pmatrix} \frac{\delta w}{\delta \mathbf{z}} \end{pmatrix} \Big|_{\mathbf{y}=\bar{\mathbf{y}}} = \begin{pmatrix} \frac{d\mathbf{z}^T}{d\mathbf{z}} \frac{\delta w}{\delta \mathbf{z}} \end{pmatrix} \Big|_{\mathbf{y}=\bar{\mathbf{y}}} , \end{aligned}$$

2019 which is the second line of Layer 4, Eq. 24.

#### 2020 *Appendix E.1.2. Form 3*

2021 Now we use the expressions of the total selection gradients of the phenotype and genotype as linear transformations  
2022 of the geno-envo-phenotype to write the total selection gradient of the geno-phenotype. Using the fourth lines of Layer  
2023 4, Eq. 21 and Layer 4, Eq. 22, we have

$$\frac{dw}{d\mathbf{z}} \Big|_{\mathbf{y}=\bar{\mathbf{y}}} \equiv \begin{pmatrix} \frac{dw}{d\mathbf{x}} \\ \frac{dw}{d\mathbf{y}} \end{pmatrix} \Big|_{\mathbf{y}=\bar{\mathbf{y}}} = \begin{pmatrix} \frac{d\mathbf{m}^T}{d\mathbf{x}} \frac{\partial w}{\partial \mathbf{m}} \\ \frac{d\mathbf{m}^T}{d\mathbf{y}} \frac{\partial w}{\partial \mathbf{m}} \end{pmatrix} \Big|_{\mathbf{y}=\bar{\mathbf{y}}}$$



$$= \left[ \left( \begin{array}{c} \frac{d\mathbf{m}^\top}{d\mathbf{x}} \\ \frac{d\mathbf{m}^\top}{d\mathbf{y}} \end{array} \right) \frac{\partial w}{\partial \mathbf{m}} \right]_{y=\bar{y}} = \left( \frac{d\mathbf{m}^\top}{d\mathbf{z}} \frac{\partial w}{\partial \mathbf{m}} \right)_{y=\bar{y}},$$

which is the third line of Layer 4, Eq. 24. 2024

### Appendix E.1.3. Form 1 2025

Now, we obtain the total selection gradient of the geno-phenotype as a linear combination of selection gradients of the geno-phenotype and environment. Using Layer 3, Eq. 1 for  $\zeta = \mathbf{z}$ , the second line of Layer 4, Eq. 24 becomes 2027

$$\frac{dw}{d\mathbf{z}} \Big|_{y=\bar{y}} = \left[ \frac{d\mathbf{z}^\top}{d\mathbf{z}} \left( \frac{\partial w}{\partial \mathbf{z}} + \frac{\partial \boldsymbol{\epsilon}^\top}{\partial \mathbf{z}} \frac{\partial w}{\partial \boldsymbol{\epsilon}} \right) \right]_{y=\bar{y}}. \quad (\text{E2})$$

We define the block matrix of total effects of a mutant's geno-phenotype on her environment as 2028

$$\frac{d\boldsymbol{\epsilon}^\top}{d\mathbf{z}} \Big|_{y=\bar{y}} \equiv \left( \begin{array}{c} \frac{d\boldsymbol{\epsilon}^\top}{d\mathbf{x}} \\ \frac{d\boldsymbol{\epsilon}^\top}{d\mathbf{y}} \end{array} \right)_{y=\bar{y}} \in \mathbb{R}^{N_a(N_p+N_g) \times N_a N_e},$$

which using Layer 4, Eq. 10 and Layer 4, Eq. 11 yields 2029

$$\begin{aligned} \frac{d\boldsymbol{\epsilon}^\top}{d\mathbf{z}} \Big|_{y=\bar{y}} &= \left( \begin{array}{cc} \frac{d\mathbf{z}^\top}{d\mathbf{x}} & \frac{\partial \boldsymbol{\epsilon}^\top}{\partial \mathbf{z}} \\ \frac{d\mathbf{z}^\top}{d\mathbf{y}} & \frac{\partial \boldsymbol{\epsilon}^\top}{\partial \mathbf{z}} \end{array} \right)_{y=\bar{y}} = \left[ \left( \begin{array}{c} \frac{d\mathbf{z}^\top}{d\mathbf{x}} \\ \frac{d\mathbf{z}^\top}{d\mathbf{y}} \end{array} \right) \frac{\partial \boldsymbol{\epsilon}^\top}{\partial \mathbf{z}} \right]_{y=\bar{y}} \\ &= \left( \frac{d\mathbf{z}^\top}{d\mathbf{z}} \frac{\partial \boldsymbol{\epsilon}^\top}{\partial \mathbf{z}} \right)_{y=\bar{y}}, \end{aligned}$$

which is Layer 4, Eq. 12, where in the second equality we factorized and in the third equality we used Layer 4, Eq. 9. 2030

Using this in Eq. (E2), the first line of Layer 4, Eq. 24 follows. 2031

### Appendix E.2. Matrix of total effects of a mutant's geno-phenotype on her geno-phenotype 2032

Here we obtain a compact expression for  $d\mathbf{z}^\top/d\mathbf{z}|_{y=\bar{y}}$ . Before doing so, let us obtain the block matrix of *total immediate effects of a mutant's geno-phenotype on her geno-phenotype* 2033

$$\begin{aligned} \frac{\delta \mathbf{z}^\top}{\delta \mathbf{z}} &\equiv \left( \begin{array}{cc} \frac{\delta \mathbf{x}^\top}{\delta \mathbf{x}} & \frac{\delta \mathbf{y}^\top}{\delta \mathbf{x}} \\ \frac{\delta \mathbf{x}^\top}{\delta \mathbf{y}} & \frac{\delta \mathbf{y}^\top}{\delta \mathbf{y}} \end{array} \right) = \left( \begin{array}{cc} \frac{\delta \mathbf{x}^\top}{\delta \mathbf{x}} & \mathbf{0} \\ \frac{\delta \mathbf{x}^\top}{\delta \mathbf{y}} & \mathbf{I} \end{array} \right) \\ &\in \mathbb{R}^{N_a(N_p+N_g) \times N_a(N_p+N_g)}, \end{aligned} \quad (\text{E3})$$

where the equality follows from the assumption that genotypic traits are developmentally independent. Using Layer 2, Eq. 6, Layer 2, Eq. 7, and Layer 2, Eq. 9 we have that 2035

$$\frac{\partial \mathbf{z}^\top}{\partial \mathbf{z}} + \frac{\partial \boldsymbol{\epsilon}^\top}{\partial \mathbf{z}} \frac{\partial \mathbf{z}^\top}{\partial \boldsymbol{\epsilon}} = \left( \begin{array}{cc} \frac{\partial \mathbf{x}^\top}{\partial \mathbf{x}} & \mathbf{0} \\ \frac{\partial \mathbf{x}^\top}{\partial \mathbf{y}} & \mathbf{I} \end{array} \right) + \left( \begin{array}{c} \frac{\partial \boldsymbol{\epsilon}^\top}{\partial \mathbf{x}} \\ \frac{\partial \boldsymbol{\epsilon}^\top}{\partial \mathbf{y}} \end{array} \right) \left( \begin{array}{cc} \frac{\partial \mathbf{x}^\top}{\partial \boldsymbol{\epsilon}} & \mathbf{0} \end{array} \right)$$

$$\begin{aligned}
 &= \begin{pmatrix} \frac{\partial \mathbf{x}^\top}{\partial \mathbf{x}} & \mathbf{0} \\ \frac{\partial \mathbf{x}^\top}{\partial \mathbf{y}} & \mathbf{I} \end{pmatrix} + \begin{pmatrix} \frac{\partial \boldsymbol{\epsilon}^\top}{\partial \mathbf{x}} \frac{\partial \mathbf{x}^\top}{\partial \boldsymbol{\epsilon}} & \mathbf{0} \\ \frac{\partial \boldsymbol{\epsilon}^\top}{\partial \mathbf{y}} \frac{\partial \mathbf{x}^\top}{\partial \boldsymbol{\epsilon}} & \mathbf{0} \end{pmatrix} \\
 &= \begin{pmatrix} \frac{\partial \mathbf{x}^\top}{\partial \mathbf{x}} + \frac{\partial \boldsymbol{\epsilon}^\top}{\partial \mathbf{x}} \frac{\partial \mathbf{x}^\top}{\partial \boldsymbol{\epsilon}} & \mathbf{0} \\ \frac{\partial \mathbf{x}^\top}{\partial \mathbf{y}} + \frac{\partial \boldsymbol{\epsilon}^\top}{\partial \mathbf{y}} \frac{\partial \mathbf{x}^\top}{\partial \boldsymbol{\epsilon}} & \mathbf{I} \end{pmatrix},
 \end{aligned}$$

2037 which equals the right-hand side of Eq. (E3) so Layer 3, Eq. 5 holds.

2038 Now, motivated by Layer 4, Eq. 1 and the equation for total effects in path analysis (Greene, 1977), suppose that

$$\frac{d\mathbf{z}^\top}{d\mathbf{z}} = (\mathbf{I} - \mathbf{E}_z)^{-1},$$

2039 for some matrix  $\mathbf{E}_z$  to be determined. Then,

$$\mathbf{E}_z = \mathbf{I} - \left( \frac{d\mathbf{z}^\top}{d\mathbf{z}} \right)^{-1}. \quad (\text{E4})$$

2040 Using Layer 4, Eq. 9 and a formula for the inverse of a  $2 \times 2$  block matrix (Horn and Johnson, 2013, Eq. 0.7.3.1), we

2041 have

$$\left( \frac{d\mathbf{z}^\top}{d\mathbf{z}} \right)^{-1} = \begin{pmatrix} \left( \frac{d\mathbf{x}^\top}{d\mathbf{x}} \right)^{-1} & \mathbf{0} \\ -\frac{d\mathbf{x}^\top}{d\mathbf{y}} \left( \frac{d\mathbf{x}^\top}{d\mathbf{x}} \right)^{-1} & \mathbf{I} \end{pmatrix}.$$

2042 Using Layer 4, Eq. 3 yields

$$\left( \frac{d\mathbf{z}^\top}{d\mathbf{z}} \right)^{-1} = \begin{pmatrix} \left( \frac{d\mathbf{x}^\top}{d\mathbf{x}} \right)^{-1} & \mathbf{0} \\ -\frac{\delta \mathbf{x}^\top}{\delta \mathbf{y}} \frac{d\mathbf{x}^\top}{d\mathbf{x}} \left( \frac{d\mathbf{x}^\top}{d\mathbf{x}} \right)^{-1} & \mathbf{I} \end{pmatrix}.$$

2043 Simplifying and using Layer 4, Eq. 1 yields

$$\left( \frac{d\mathbf{z}^\top}{d\mathbf{z}} \right)^{-1} = \begin{pmatrix} 2\mathbf{I} - \frac{\delta \mathbf{x}^\top}{\delta \mathbf{x}} & \mathbf{0} \\ -\frac{\delta \mathbf{x}^\top}{\delta \mathbf{y}} & \mathbf{I} \end{pmatrix}.$$

2044 Substituting in Eq. (E4) and simplifying yields

$$\mathbf{E}_z = \mathbf{I} - \begin{pmatrix} 2\mathbf{I} - \frac{\delta \mathbf{x}^\top}{\delta \mathbf{x}} & \mathbf{0} \\ -\frac{\delta \mathbf{x}^\top}{\delta \mathbf{y}} & \mathbf{I} \end{pmatrix} = \begin{pmatrix} -\mathbf{I} + \frac{\delta \mathbf{x}^\top}{\delta \mathbf{x}} & \mathbf{0} \\ \frac{\delta \mathbf{x}^\top}{\delta \mathbf{y}} & \mathbf{0} \end{pmatrix} = \begin{pmatrix} \frac{\delta \mathbf{x}^\top}{\delta \mathbf{x}} & \mathbf{0} \\ \frac{\delta \mathbf{x}^\top}{\delta \mathbf{y}} & \mathbf{I} \end{pmatrix} - \mathbf{I}.$$

2045 Hence,

$$\mathbf{E}_z = \frac{\delta \mathbf{z}^\top}{\delta \mathbf{z}} - \mathbf{I},$$

2046 and so Layer 4, Eq. 9 holds.

## Appendix F. Total selection gradient of the geno-envo-phenotype

2047

We have that the mutant geno-envo-phenotype is  $\mathbf{m} = (\mathbf{x}; \mathbf{y}; \boldsymbol{\epsilon})$ . We now define the direct, total immediate, and total selection gradients of the geno-envo-phenotype and write the total selection gradient of the geno-envo-phenotype in terms of the partial selection gradient of the geno-envo-phenotype.

2048

2049

2050

We have the *selection gradient of the geno-envo-phenotype*

2051

$$\left. \frac{\partial w}{\partial \mathbf{m}} \right|_{\mathbf{y}=\bar{\mathbf{y}}} \equiv \left( \frac{\partial w}{\partial \mathbf{x}}; \frac{\partial w}{\partial \mathbf{y}}; \frac{\partial w}{\partial \boldsymbol{\epsilon}} \right) \Bigg|_{\mathbf{y}=\bar{\mathbf{y}}} \in \mathbb{R}^{N_a(N_p+N_g+N_e) \times 1},$$

the *total immediate selection gradient of the geno-envo-phenotype*

2052

$$\left. \frac{\delta w}{\delta \mathbf{m}} \right|_{\mathbf{y}=\bar{\mathbf{y}}} = \left( \frac{\delta w}{\delta \mathbf{x}}; \frac{\delta w}{\delta \mathbf{y}}; \frac{\delta w}{\delta \boldsymbol{\epsilon}} \right) \Bigg|_{\mathbf{y}=\bar{\mathbf{y}}} \in \mathbb{R}^{N_a(N_p+N_g+N_e) \times 1},$$

and the *total selection gradient of the geno-envo-phenotype*

2053

$$\left. \frac{dw}{d\mathbf{m}} \right|_{\mathbf{y}=\bar{\mathbf{y}}} = \left( \frac{dw}{d\mathbf{x}}; \frac{dw}{d\mathbf{y}}; \frac{dw}{d\boldsymbol{\epsilon}} \right) \Bigg|_{\mathbf{y}=\bar{\mathbf{y}}} \in \mathbb{R}^{N_a(N_p+N_g+N_e) \times 1}.$$

Now we use the expressions of the total selection gradients of the phenotype, genotype, and environment as linear transformations of the geno-envo-phenotype to write the total selection gradient of the geno-envo-phenotype. Using the fourth lines of Layer 4, Eq. 21 and Layer 4, Eq. 22 and the third line of Layer 4, Eq. 23, we have

2054

2055

2056

$$\begin{aligned} \left. \frac{dw}{d\mathbf{m}} \right|_{\mathbf{y}=\bar{\mathbf{y}}} &\equiv \begin{pmatrix} \frac{dw}{d\mathbf{x}} \\ \frac{dw}{d\mathbf{y}} \\ \frac{dw}{d\boldsymbol{\epsilon}} \end{pmatrix} \Bigg|_{\mathbf{y}=\bar{\mathbf{y}}} = \begin{pmatrix} \frac{d\mathbf{m}^T}{d\mathbf{x}} \frac{\partial w}{\partial \mathbf{m}} \\ \frac{d\mathbf{m}^T}{d\mathbf{y}} \frac{\partial w}{\partial \mathbf{m}} \\ \frac{d\mathbf{m}^T}{d\boldsymbol{\epsilon}} \frac{\partial w}{\partial \mathbf{m}} \end{pmatrix} \Bigg|_{\mathbf{y}=\bar{\mathbf{y}}} \\ &= \begin{pmatrix} \frac{d\mathbf{m}^T}{d\mathbf{x}} \\ \frac{d\mathbf{m}^T}{d\mathbf{y}} \\ \frac{d\mathbf{m}^T}{d\boldsymbol{\epsilon}} \end{pmatrix} \Bigg|_{\mathbf{y}=\bar{\mathbf{y}}} \frac{\partial w}{\partial \mathbf{m}} = \left( \frac{d\mathbf{m}^T}{d\mathbf{m}} \frac{\partial w}{\partial \mathbf{m}} \right) \Bigg|_{\mathbf{y}=\bar{\mathbf{y}}}, \end{aligned}$$

which is Layer 4, Eq. 25.

2057

To see that  $d\mathbf{m}^T/d\mathbf{m}|_{\mathbf{y}=\bar{\mathbf{y}}}$  is non-singular, we factorize it as follows. We define the block matrix

2058

$$\begin{aligned} \left. \frac{\gamma \mathbf{m}^T}{\gamma \mathbf{m}} \right|_{\mathbf{y}=\bar{\mathbf{y}}} &= \begin{pmatrix} \mathbf{I} & \mathbf{0} & \frac{\partial \boldsymbol{\epsilon}^T}{\partial \mathbf{x}} \\ \mathbf{0} & \mathbf{I} & \frac{\partial \boldsymbol{\epsilon}^T}{\partial \mathbf{y}} \\ \mathbf{0} & \mathbf{0} & \frac{\partial \boldsymbol{\epsilon}^T}{\partial \boldsymbol{\epsilon}} \end{pmatrix} \Bigg|_{\mathbf{y}=\bar{\mathbf{y}}} \\ &\in \mathbb{R}^{N_a(N_p+N_g+N_e) \times N_a(N_p+N_g+N_e)}, \end{aligned}$$

2059 which is non-singular since it is square, block upper triangular, and  $\partial \boldsymbol{\epsilon}^T / \partial \boldsymbol{\epsilon} = \mathbf{I}$  (Layer 2, Eq. 3). We also define the  
2060 block matrix of

$$\frac{\beta \mathbf{m}^T}{\beta \mathbf{m}} \Big|_{y=\bar{y}} = \left( \begin{array}{ccc} \frac{d\mathbf{x}^T}{d\mathbf{x}} & \mathbf{0} & \mathbf{0} \\ \frac{d\mathbf{x}^T}{d\mathbf{y}} & \mathbf{I} & \mathbf{0} \\ \frac{d\mathbf{x}^T}{d\boldsymbol{\epsilon}} & \mathbf{0} & \mathbf{I} \end{array} \right) \Big|_{y=\bar{y}}$$

$$\in \mathbb{R}^{N_a(N_p+N_g+N_c) \times N_a(N_p+N_g+N_c)},$$

2061 which is non-singular since it is square, block lower triangular, and  $d\mathbf{x}^T/d\mathbf{x}$  is non-singular (Eq. B15). Note that

$$\left( \begin{array}{cc} \beta \mathbf{m}^T & \gamma \mathbf{m}^T \\ \beta \mathbf{m} & \gamma \mathbf{m} \end{array} \right) \Big|_{y=\bar{y}} = \left( \begin{array}{ccc} \frac{d\mathbf{x}^T}{d\mathbf{x}} & \mathbf{0} & \mathbf{0} \\ \frac{d\mathbf{x}^T}{d\mathbf{y}} & \mathbf{I} & \mathbf{0} \\ \frac{d\mathbf{x}^T}{d\boldsymbol{\epsilon}} & \mathbf{0} & \mathbf{I} \end{array} \right) \left( \begin{array}{ccc} \mathbf{I} & \mathbf{0} & \frac{\partial \boldsymbol{\epsilon}^T}{\partial \mathbf{x}} \\ \mathbf{0} & \mathbf{I} & \frac{\partial \boldsymbol{\epsilon}^T}{\partial \mathbf{y}} \\ \mathbf{0} & \mathbf{0} & \frac{\partial \boldsymbol{\epsilon}^T}{\partial \boldsymbol{\epsilon}} \end{array} \right) \Big|_{y=\bar{y}}$$

$$= \left( \begin{array}{ccc} \frac{d\mathbf{x}^T}{d\mathbf{x}} & \mathbf{0} & \frac{d\mathbf{x}^T}{d\mathbf{x}} \frac{\partial \boldsymbol{\epsilon}^T}{\partial \mathbf{x}} \\ \frac{d\mathbf{x}^T}{d\mathbf{y}} & \mathbf{I} & \frac{d\mathbf{x}^T}{d\mathbf{y}} \frac{\partial \boldsymbol{\epsilon}^T}{\partial \mathbf{x}} + \frac{\partial \boldsymbol{\epsilon}^T}{\partial \mathbf{y}} \\ \frac{d\mathbf{x}^T}{d\boldsymbol{\epsilon}} & \mathbf{0} & \frac{d\mathbf{x}^T}{d\boldsymbol{\epsilon}} \frac{\partial \boldsymbol{\epsilon}^T}{\partial \mathbf{x}} + \frac{\partial \boldsymbol{\epsilon}^T}{\partial \boldsymbol{\epsilon}} \end{array} \right) \Big|_{y=\bar{y}}$$

$$= \left( \begin{array}{ccc} \frac{d\mathbf{x}^T}{d\mathbf{x}} & \mathbf{0} & \frac{d\boldsymbol{\epsilon}^T}{d\mathbf{x}} \\ \frac{d\mathbf{x}^T}{d\mathbf{y}} & \mathbf{I} & \frac{d\boldsymbol{\epsilon}^T}{d\mathbf{y}} \\ \frac{d\mathbf{x}^T}{d\boldsymbol{\epsilon}} & \mathbf{0} & \frac{d\boldsymbol{\epsilon}^T}{d\boldsymbol{\epsilon}} \end{array} \right) \Big|_{y=\bar{y}},$$

2062 where the last equality follows from Layer 4, Eq. 10, Layer 4, Eq. 11, and Layer 4, Eq. 13. Using Layer 4, Eq. 18, we  
2063 thus have that

$$\frac{d\mathbf{m}^T}{d\mathbf{m}} \Big|_{y=\bar{y}} = \left( \begin{array}{cc} \beta \mathbf{m}^T & \gamma \mathbf{m}^T \\ \beta \mathbf{m} & \gamma \mathbf{m} \end{array} \right) \Big|_{y=\bar{y}}.$$

2064 Hence,  $d\mathbf{m}^T/d\mathbf{m}|_{y=\bar{y}}$  is non-singular since  $\beta \mathbf{m}^T/\beta \mathbf{m}|_{y=\bar{y}}$  and  $\gamma \mathbf{m}^T/\gamma \mathbf{m}|_{y=\bar{y}}$  are square and non-singular.

## 2065 Appendix G. Evolutionary dynamics of the phenotype

2066 Here we derive an equation describing the evolutionary dynamics of the resident phenotype.

2067 From Eqs. (S10) and (S19), we have that the evolutionary dynamics of the resident genotype satisfy the canonical  
2068 equation

$$\frac{\Delta \bar{y}}{\Delta \tau} \approx \iota \mathbf{H}_y \frac{dw}{dy} \Big|_{y=\bar{y}}, \quad (\text{G1})$$

whereas the developmental dynamics of the resident phenotype satisfy the developmental constraint

2069

$$\bar{\mathbf{x}}_{a+1} = \mathbf{g}_a^{\circ},$$

for  $a \in \{1, \dots, N_a - 1\}$ .

2070

Let  $\bar{\mathbf{z}}(\tau)$  be the resident geno-phenotype at evolutionary time  $\tau$ , specifically at the point where the socio-devo stable resident is at carrying capacity, marked in Fig. 3. The  $i$ -th mutant phenotype at age  $j + 1$  at such evolutionary time  $\tau$  is  $x_{i,j+1} = g_{ij}(\mathbf{z}_j(\tau), \mathbf{h}_j(\mathbf{z}_j(\tau), \bar{\mathbf{z}}(\tau), \tau), \bar{\mathbf{z}}(\tau))$ . Then, evolutionary change in the  $i$ -th resident phenotype at age  $a \in \{2, \dots, N_a\}$  is

2071

2072

2073

2074

$$\begin{aligned} \frac{\Delta \bar{x}_{ia}}{\Delta \tau} = & \frac{1}{\Delta \tau} \left[ g_{i,a-1} \left( \mathbf{z}_{a-1}(\tau + \Delta \tau), \right. \right. \\ & \left. \left. \mathbf{h}_{a-1}(\mathbf{z}_{a-1}(\tau + \Delta \tau), \bar{\mathbf{z}}(\tau + \Delta \tau), \tau + \Delta \tau), \right. \right. \\ & \left. \left. \bar{\mathbf{z}}(\tau + \Delta \tau) \right) \right. \\ & \left. - g_{i,a-1} \left( \mathbf{z}_{a-1}(\tau), \mathbf{h}_{a-1}(\mathbf{z}_{a-1}(\tau), \bar{\mathbf{z}}(\tau), \tau), \bar{\mathbf{z}}(\tau) \right) \right] \Big|_{\mathbf{y}=\bar{\mathbf{y}}}. \end{aligned}$$

Taking the limit as  $\Delta \tau \rightarrow 0$ , this becomes

2075

$$\frac{d\bar{x}_{ia}}{d\tau} = \frac{dg_{i,a-1}(\mathbf{z}_{a-1}(\tau), \mathbf{h}_{a-1}(\mathbf{z}_{a-1}(\tau), \bar{\mathbf{z}}(\tau), \tau), \bar{\mathbf{z}}(\tau))}{d\tau} \Big|_{\mathbf{y}=\bar{\mathbf{y}}}.$$

Applying the chain rule, we obtain

2076

$$\begin{aligned} \frac{d\bar{x}_{ia}}{d\tau} = & \left( \sum_{j=1}^{N_p} \frac{\partial g_{i,a-1}}{\partial x_{j,a-1}} \frac{dx_{j,a-1}}{d\tau} + \sum_{j=1}^{N_g} \frac{\partial g_{i,a-1}}{\partial y_{j,a-1}} \frac{dy_{j,a-1}}{d\tau} \right. \\ & + \sum_{j=1}^{N_p} \sum_{r=1}^{N_e} \frac{\partial g_{i,a-1}}{\partial \epsilon_{r,a-1}} \frac{\partial \epsilon_{r,a-1}}{\partial x_{j,a-1}} \frac{dx_{j,a-1}}{d\tau} + \sum_{j=1}^{N_g} \sum_{r=1}^{N_e} \frac{\partial g_{i,a-1}}{\partial \epsilon_{r,a-1}} \frac{\partial \epsilon_{r,a-1}}{\partial y_{j,a-1}} \frac{dy_{j,a-1}}{d\tau} \\ & + \sum_{k=1}^{N_a} \sum_{j=1}^{N_p} \sum_{r=1}^{N_e} \frac{\partial g_{i,a-1}}{\partial \epsilon_{r,a-1}} \frac{\partial \epsilon_{r,a-1}}{\partial \bar{x}_{jk}} \frac{d\bar{x}_{jk}}{d\tau} \\ & + \sum_{k=1}^{N_a} \sum_{j=1}^{N_g} \sum_{r=1}^{N_e} \frac{\partial g_{i,a-1}}{\partial \epsilon_{r,a-1}} \frac{\partial \epsilon_{r,a-1}}{\partial \bar{y}_{jk}} \frac{d\bar{y}_{jk}}{d\tau} + \sum_{r=1}^{N_e} \frac{\partial g_{i,a-1}}{\partial \epsilon_{r,a-1}} \frac{\partial \epsilon_{r,a-1}}{\partial \tau} \\ & \left. + \sum_{k=1}^{N_a} \sum_{j=1}^{N_p} \frac{\partial g_{i,a-1}}{\partial \bar{x}_{jk}} \frac{d\bar{x}_{jk}}{d\tau} + \sum_{k=1}^{N_a} \sum_{j=1}^{N_g} \frac{\partial g_{i,a-1}}{\partial \bar{y}_{jk}} \frac{d\bar{y}_{jk}}{d\tau} \right) \Big|_{\mathbf{y}=\bar{\mathbf{y}}}. \end{aligned}$$

Applying matrix calculus notation (Appendix A), this is

2077

$$\begin{aligned} \frac{d\bar{x}_{ia}}{d\tau} = & \left( \frac{\partial g_{i,a-1}}{\partial \mathbf{x}_{a-1}^T} \frac{d\mathbf{x}_{a-1}}{d\tau} + \frac{\partial g_{i,a-1}}{\partial \mathbf{y}_{a-1}^T} \frac{d\mathbf{y}_{a-1}}{d\tau} \right. \\ & \left. + \sum_{k=1}^{N_a} \frac{\partial g_{i,a-1}}{\partial \bar{\mathbf{x}}_{jk}^T} \frac{d\bar{\mathbf{x}}_{jk}}{d\tau} + \sum_{k=1}^{N_a} \frac{\partial g_{i,a-1}}{\partial \bar{\mathbf{y}}_{jk}^T} \frac{d\bar{\mathbf{y}}_{jk}}{d\tau} + \frac{\partial g_{i,a-1}}{\partial \tau} \right) \Big|_{\mathbf{y}=\bar{\mathbf{y}}}. \end{aligned}$$

$$\begin{aligned}
 & + \sum_{j=1}^{N_p} \frac{\partial g_{i,a-1}}{\partial \boldsymbol{\epsilon}_{a-1}^T} \frac{\partial \boldsymbol{\epsilon}_{a-1}}{\partial x_{j,a-1}} \frac{dx_{j,a-1}}{d\tau} + \sum_{j=1}^{N_g} \frac{\partial g_{i,a-1}}{\partial \boldsymbol{\epsilon}_{a-1}^T} \frac{\partial \boldsymbol{\epsilon}_{a-1}}{\partial y_{j,a-1}} \frac{dy_{j,a-1}}{d\tau} \\
 & + \sum_{k=1}^{N_a} \sum_{j=1}^{N_p} \frac{\partial g_{i,a-1}}{\partial \boldsymbol{\epsilon}_{a-1}^T} \frac{\partial \boldsymbol{\epsilon}_{a-1}}{\partial \bar{x}_{jk}} \frac{d\bar{x}_{jk}}{d\tau} \\
 & + \sum_{k=1}^{N_a} \sum_{j=1}^{N_g} \frac{\partial g_{i,a-1}}{\partial \boldsymbol{\epsilon}_{a-1}^T} \frac{\partial \boldsymbol{\epsilon}_{a-1}}{\partial \bar{y}_{jk}} \frac{d\bar{y}_{jk}}{d\tau} + \frac{\partial g_{i,a-1}}{\partial \boldsymbol{\epsilon}_{a-1}^T} \frac{\partial \boldsymbol{\epsilon}_{a-1}}{\partial \tau} \\
 & + \sum_{k=1}^{N_a} \frac{\partial g_{i,a-1}}{\partial \bar{\mathbf{x}}_k^T} \frac{d\bar{\mathbf{x}}_k}{d\tau} + \sum_{k=1}^{N_a} \frac{\partial g_{i,a-1}}{\partial \bar{\mathbf{y}}_k^T} \frac{d\bar{\mathbf{y}}_k}{d\tau} \Bigg|_{\mathbf{y}=\bar{\mathbf{y}}}.
 \end{aligned}$$

2078 Applying matrix calculus notation again yields

$$\begin{aligned}
 \frac{d\bar{x}_{ia}}{d\tau} = & \left( \frac{\partial g_{i,a-1}}{\partial \mathbf{x}_{a-1}^T} \frac{d\mathbf{x}_{a-1}}{d\tau} + \frac{\partial g_{i,a-1}}{\partial \mathbf{y}_{a-1}^T} \frac{d\mathbf{y}_{a-1}}{d\tau} \right. \\
 & + \frac{\partial g_{i,a-1}}{\partial \boldsymbol{\epsilon}_{a-1}^T} \frac{\partial \boldsymbol{\epsilon}_{a-1}}{\partial \mathbf{x}_{a-1}^T} \frac{d\mathbf{x}_{a-1}}{d\tau} + \frac{\partial g_{i,a-1}}{\partial \boldsymbol{\epsilon}_{a-1}^T} \frac{\partial \boldsymbol{\epsilon}_{a-1}}{\partial \mathbf{y}_{a-1}^T} \frac{d\mathbf{y}_{a-1}}{d\tau} \\
 & + \frac{\partial g_{i,a-1}}{\partial \boldsymbol{\epsilon}_{a-1}^T} \frac{\partial \boldsymbol{\epsilon}_{a-1}}{\partial \bar{\mathbf{x}}^T} \frac{d\bar{\mathbf{x}}}{d\tau} + \frac{\partial g_{i,a-1}}{\partial \boldsymbol{\epsilon}_{a-1}^T} \frac{\partial \boldsymbol{\epsilon}_{a-1}}{\partial \bar{\mathbf{y}}^T} \frac{d\bar{\mathbf{y}}}{d\tau} + \frac{\partial g_{i,a-1}}{\partial \boldsymbol{\epsilon}_{a-1}^T} \frac{\partial \boldsymbol{\epsilon}_{a-1}}{\partial \tau} \\
 & \left. + \frac{\partial g_{i,a-1}}{\partial \bar{\mathbf{x}}^T} \frac{d\bar{\mathbf{x}}}{d\tau} + \frac{\partial g_{i,a-1}}{\partial \bar{\mathbf{y}}^T} \frac{d\bar{\mathbf{y}}}{d\tau} \right) \Bigg|_{\mathbf{y}=\bar{\mathbf{y}}}.
 \end{aligned}$$

2079 Factorizing, we have

$$\begin{aligned}
 \frac{d\bar{x}_{ia}}{d\tau} = & \left[ \left( \frac{\partial g_{i,a-1}}{\partial \mathbf{x}_{a-1}^T} + \frac{\partial g_{i,a-1}}{\partial \boldsymbol{\epsilon}_{a-1}^T} \frac{\partial \boldsymbol{\epsilon}_{a-1}}{\partial \mathbf{x}_{a-1}^T} \right) \frac{d\mathbf{x}_{a-1}}{d\tau} \right. \\
 & + \left( \frac{\partial g_{i,a-1}}{\partial \mathbf{y}_{a-1}^T} + \frac{\partial g_{i,a-1}}{\partial \boldsymbol{\epsilon}_{a-1}^T} \frac{\partial \boldsymbol{\epsilon}_{a-1}}{\partial \mathbf{y}_{a-1}^T} \right) \frac{d\mathbf{y}_{a-1}}{d\tau} \\
 & + \left( \frac{\partial g_{i,a-1}}{\partial \bar{\mathbf{x}}^T} + \frac{\partial g_{i,a-1}}{\partial \boldsymbol{\epsilon}_{a-1}^T} \frac{\partial \boldsymbol{\epsilon}_{a-1}}{\partial \bar{\mathbf{x}}^T} \right) \frac{d\bar{\mathbf{x}}}{d\tau} \\
 & \left. + \left( \frac{\partial g_{i,a-1}}{\partial \bar{\mathbf{y}}^T} + \frac{\partial g_{i,a-1}}{\partial \boldsymbol{\epsilon}_{a-1}^T} \frac{\partial \boldsymbol{\epsilon}_{a-1}}{\partial \bar{\mathbf{y}}^T} \right) \frac{d\bar{\mathbf{y}}}{d\tau} + \frac{\partial g_{i,a-1}}{\partial \boldsymbol{\epsilon}_{a-1}^T} \frac{\partial \boldsymbol{\epsilon}_{a-1}}{\partial \tau} \right] \Bigg|_{\mathbf{y}=\bar{\mathbf{y}}}.
 \end{aligned}$$

2080 Rewriting  $g_{i,a-1}$  as  $x_{ia}$  yields

$$\begin{aligned}
 \frac{d\bar{x}_{ia}}{d\tau} = & \left[ \left( \frac{\partial x_{ia}}{\partial \mathbf{x}_{a-1}^T} + \frac{\partial x_{ia}}{\partial \boldsymbol{\epsilon}_{a-1}^T} \frac{\partial \boldsymbol{\epsilon}_{a-1}}{\partial \mathbf{x}_{a-1}^T} \right) \frac{d\mathbf{x}_{a-1}}{d\tau} \right. \\
 & + \left( \frac{\partial x_{ia}}{\partial \mathbf{y}_{a-1}^T} + \frac{\partial x_{ia}}{\partial \boldsymbol{\epsilon}_{a-1}^T} \frac{\partial \boldsymbol{\epsilon}_{a-1}}{\partial \mathbf{y}_{a-1}^T} \right) \frac{d\mathbf{y}_{a-1}}{d\tau} \\
 & \left. + \left( \frac{\partial x_{ia}}{\partial \bar{\mathbf{x}}^T} + \frac{\partial x_{ia}}{\partial \boldsymbol{\epsilon}_{a-1}^T} \frac{\partial \boldsymbol{\epsilon}_{a-1}}{\partial \bar{\mathbf{x}}^T} \right) \frac{d\bar{\mathbf{x}}}{d\tau} \right.
 \end{aligned}$$

$$+ \left( \frac{\partial x_{ia}}{\partial \bar{y}^\top} + \frac{\partial x_{ia}}{\partial \boldsymbol{\epsilon}_{a-1}^\top} \frac{\partial \boldsymbol{\epsilon}_{a-1}}{\partial \bar{y}^\top} \right) \frac{d\bar{y}}{d\tau} + \frac{\partial x_{ia}}{\partial \boldsymbol{\epsilon}_{a-1}^\top} \frac{\partial \boldsymbol{\epsilon}_{a-1}}{\partial \tau} \Bigg|_{\bar{y}=\bar{y}}.$$

Hence, for all resident phenotypes at age  $a \in \{2, \dots, N_a\}$ , we have

2081

$$\begin{aligned} \frac{d\bar{\mathbf{x}}_a}{d\tau} = & \left[ \left( \frac{\partial \mathbf{x}_a}{\partial \bar{\mathbf{x}}_{a-1}^\top} + \frac{\partial \mathbf{x}_a}{\partial \boldsymbol{\epsilon}_{a-1}^\top} \frac{\partial \boldsymbol{\epsilon}_{a-1}}{\partial \bar{\mathbf{x}}_{a-1}^\top} \right) \frac{d\bar{\mathbf{x}}_{a-1}}{d\tau} \right. \\ & + \left( \frac{\partial \mathbf{x}_a}{\partial \bar{\mathbf{y}}_{a-1}^\top} + \frac{\partial \mathbf{x}_a}{\partial \boldsymbol{\epsilon}_{a-1}^\top} \frac{\partial \boldsymbol{\epsilon}_{a-1}}{\partial \bar{\mathbf{y}}_{a-1}^\top} \right) \frac{d\bar{\mathbf{y}}_{a-1}}{d\tau} \\ & + \left( \frac{\partial \mathbf{x}_a}{\partial \bar{\boldsymbol{\zeta}}^\top} + \frac{\partial \mathbf{x}_a}{\partial \boldsymbol{\epsilon}_{a-1}^\top} \frac{\partial \boldsymbol{\epsilon}_{a-1}}{\partial \bar{\boldsymbol{\zeta}}^\top} \right) \frac{d\bar{\boldsymbol{\zeta}}}{d\tau} \\ & \left. + \left( \frac{\partial \mathbf{x}_a}{\partial \bar{\mathbf{y}}^\top} + \frac{\partial \mathbf{x}_a}{\partial \boldsymbol{\epsilon}_{a-1}^\top} \frac{\partial \boldsymbol{\epsilon}_{a-1}}{\partial \bar{\mathbf{y}}^\top} \right) \frac{d\bar{\mathbf{y}}}{d\tau} + \frac{\partial \mathbf{x}_a}{\partial \boldsymbol{\epsilon}_{a-1}^\top} \frac{\partial \boldsymbol{\epsilon}_{a-1}}{\partial \tau} \right] \Bigg|_{\bar{y}=\bar{y}}. \end{aligned} \quad (\text{G2})$$

Here we used the following series of definitions. The matrix of *direct effects of social partner's phenotype at age  $a$  on the mutant's phenotype at age  $j$*  is

2082

2083

$$\frac{\partial \mathbf{x}_j^\top}{\partial \bar{\mathbf{x}}_a} \Bigg|_{\bar{y}=\bar{y}} \equiv \begin{pmatrix} \frac{\partial x_{1j}}{\partial \bar{x}_{1a}} & \dots & \frac{\partial x_{N_p j}}{\partial \bar{x}_{1a}} \\ \vdots & \ddots & \vdots \\ \frac{\partial x_{1j}}{\partial \bar{x}_{N_p a}} & \dots & \frac{\partial x_{N_p j}}{\partial \bar{x}_{N_p a}} \end{pmatrix} \Bigg|_{\bar{y}=\bar{y}} \in \mathbb{R}^{N_p \times N_p},$$

and the block matrix of direct effects of social partners' phenotype on a mutant's phenotype is given by Layer 2, Eq. 4 with  $\bar{\boldsymbol{\zeta}} = \bar{\mathbf{x}}$ . The matrix  $\partial \mathbf{x}_a^\top / \partial \bar{\mathbf{x}}$  is the  $a$ -th block column of  $\partial \mathbf{x}^\top / \partial \bar{\mathbf{x}}$ .

2084

2085

Similarly, the matrix of *direct effects of social partners' genotypic trait values at age  $a$  on a mutant's phenotype at age  $j$*  is

2086

2087

$$\frac{\partial \mathbf{x}_j^\top}{\partial \bar{\mathbf{y}}_a} \Bigg|_{\bar{y}=\bar{y}} \equiv \begin{pmatrix} \frac{\partial x_{1j}}{\partial \bar{y}_{1a}} & \dots & \frac{\partial x_{N_p j}}{\partial \bar{y}_{1a}} \\ \vdots & \ddots & \vdots \\ \frac{\partial x_{1j}}{\partial \bar{y}_{N_g a}} & \dots & \frac{\partial x_{N_p j}}{\partial \bar{y}_{N_g a}} \end{pmatrix} \Bigg|_{\bar{y}=\bar{y}} \in \mathbb{R}^{N_g \times N_p},$$

and the block matrix of direct effects of social partners' genotype on a mutant's phenotype is given by Eq. (Layer 2, Eq. 4) with  $\bar{\boldsymbol{\zeta}} = \bar{\mathbf{y}}$ . The matrix  $\partial \mathbf{x}_a^\top / \partial \bar{\mathbf{y}}$  is the  $a$ -th block column of  $\partial \mathbf{x}^\top / \partial \bar{\mathbf{y}}$ .

2088

2089

In turn, the matrix of *direct effects of social partners' phenotype at age  $a$  on a mutant's environment at age  $j$*  is

2090

$$\frac{\partial \boldsymbol{\epsilon}_j^\top}{\partial \bar{\mathbf{x}}_a} \Bigg|_{\bar{y}=\bar{y}} \equiv \begin{pmatrix} \frac{\partial \epsilon_{1j}}{\partial \bar{x}_{1a}} & \dots & \frac{\partial \epsilon_{N_e j}}{\partial \bar{x}_{1a}} \\ \vdots & \ddots & \vdots \\ \frac{\partial \epsilon_{1j}}{\partial \bar{x}_{N_p a}} & \dots & \frac{\partial \epsilon_{N_e j}}{\partial \bar{x}_{N_p a}} \end{pmatrix} \Bigg|_{\bar{y}=\bar{y}} \in \mathbb{R}^{N_e \times N_p},$$

and the block matrix of direct effects of social partners' phenotype on a mutant's environment is given by Layer 2, Eq. 5 with  $\bar{\boldsymbol{\zeta}} = \bar{\mathbf{x}}$ . The matrix  $\partial \boldsymbol{\epsilon}_a^\top / \partial \bar{\mathbf{x}}$  is the  $a$ -th block column of  $\partial \boldsymbol{\epsilon}^\top / \partial \bar{\mathbf{x}}$ .

2091

2092

2093 Similarly, the matrix of *direct effects of social partners' genotypic trait values at age a on a mutant's environment*  
 2094 *at age j* is

$$\left. \frac{\partial \boldsymbol{\epsilon}_j^T}{\partial \bar{\mathbf{y}}_a} \right|_{\mathbf{y}=\bar{\mathbf{y}}} \equiv \left( \begin{array}{ccc} \frac{\partial \epsilon_{1j}}{\partial \bar{y}_{1a}} & \cdots & \frac{\partial \epsilon_{N_e j}}{\partial \bar{y}_{1a}} \\ \vdots & \ddots & \vdots \\ \frac{\partial \epsilon_{1j}}{\partial \bar{y}_{N_g a}} & \cdots & \frac{\partial \epsilon_{N_e j}}{\partial \bar{y}_{N_g a}} \end{array} \right) \Bigg|_{\mathbf{y}=\bar{\mathbf{y}}} \in \mathbb{R}^{N_e \times N_g},$$

2095 and the block matrix of *direct effects of social partners' genotype on a mutant's environment* is given by Layer 2,  
 2096 Eq. 5 with  $\bar{\boldsymbol{\zeta}} = \bar{\mathbf{y}}$ . The matrix  $\partial \boldsymbol{\epsilon}_a^T / \partial \bar{\mathbf{y}}$  is the  $a$ -th block column of  $\partial \boldsymbol{\epsilon}^T / \partial \bar{\mathbf{y}}$ .

2097 Having made these definitions explicit, we now write Eq. (G2) as

$$\begin{aligned} \frac{d\bar{\mathbf{x}}_a}{d\tau} = & \left( \frac{\delta \mathbf{x}_a}{\delta \mathbf{x}_{a-1}^T} \frac{d\mathbf{x}_{a-1}}{d\tau} + \frac{\delta \mathbf{x}_a}{\delta \mathbf{y}_{a-1}^T} \frac{d\mathbf{y}_{a-1}}{d\tau} \right. \\ & \left. + \frac{\delta \mathbf{x}_a}{\delta \bar{\mathbf{x}}^T} \frac{d\bar{\mathbf{x}}}{d\tau} + \frac{\delta \mathbf{x}_a}{\delta \bar{\mathbf{y}}^T} \frac{d\bar{\mathbf{y}}}{d\tau} + \frac{\delta \mathbf{x}_a}{\delta \boldsymbol{\epsilon}_{a-1}^T} \frac{\partial \boldsymbol{\epsilon}_{a-1}}{\partial \tau} \right) \Bigg|_{\mathbf{y}=\bar{\mathbf{y}}}, \end{aligned} \quad (\text{G3})$$

2098 where we used the transpose of the total immediate effects of a mutant's phenotype and genotype on her phenotype  
 2099 (Eqs. B10 and C9), and the the matrix of *total immediate effects of social partners' phenotype or genotype at age a*  
 2100 *on a mutant's phenotype at age j*

$$\left. \frac{\delta \mathbf{x}_j^T}{\delta \bar{\boldsymbol{\zeta}}_a} \right|_{\mathbf{y}=\bar{\mathbf{y}}} = \begin{cases} \left( \frac{\partial \mathbf{x}_j^T}{\partial \bar{\boldsymbol{\zeta}}_a} + \frac{\partial \boldsymbol{\epsilon}_{j-1}^T}{\partial \bar{\boldsymbol{\zeta}}_a} \frac{\partial \mathbf{x}_j^T}{\partial \boldsymbol{\epsilon}_{j-1}} \right) \Bigg|_{\mathbf{y}=\bar{\mathbf{y}}} & \text{for } j > 1 \\ \mathbf{0} & \text{for } j = 1, \end{cases} \quad (\text{G4})$$

2101 for  $\bar{\boldsymbol{\zeta}} \in \{\bar{\mathbf{x}}, \bar{\mathbf{y}}\}$  since the initial phenotype  $\mathbf{x}_1$  is constant by assumption. We also define the corresponding matrix of  
 2102 *total immediate effects of social partners' phenotype on a mutant's phenotype* as

$$\begin{aligned} \left. \frac{\delta \mathbf{x}^T}{\delta \bar{\boldsymbol{\zeta}}} \right|_{\mathbf{y}=\bar{\mathbf{y}}} & \equiv \left( \begin{array}{ccc} \frac{\delta \mathbf{x}_1^T}{\delta \bar{\boldsymbol{\zeta}}_1} & \cdots & \frac{\delta \mathbf{x}_{N_a}^T}{\delta \bar{\boldsymbol{\zeta}}_1} \\ \vdots & \ddots & \vdots \\ \frac{\delta \mathbf{x}_1^T}{\delta \bar{\boldsymbol{\zeta}}_{N_a}} & \cdots & \frac{\delta \mathbf{x}_{N_a}^T}{\delta \bar{\boldsymbol{\zeta}}_{N_a}} \end{array} \right) \Bigg|_{\mathbf{y}=\bar{\mathbf{y}}} \\ & = \left( \begin{array}{ccc} \mathbf{0} & \frac{\delta \mathbf{x}_2^T}{\delta \bar{\boldsymbol{\zeta}}_1} & \cdots & \frac{\delta \mathbf{x}_{N_a}^T}{\delta \bar{\boldsymbol{\zeta}}_1} \\ \mathbf{0} & \frac{\delta \mathbf{x}_2^T}{\delta \bar{\boldsymbol{\zeta}}_2} & \cdots & \frac{\delta \mathbf{x}_{N_a}^T}{\delta \bar{\boldsymbol{\zeta}}_2} \\ \vdots & \vdots & \ddots & \vdots \\ \mathbf{0} & \frac{\delta \mathbf{x}_2^T}{\delta \bar{\boldsymbol{\zeta}}_{N_a}} & \cdots & \frac{\delta \mathbf{x}_{N_a}^T}{\delta \bar{\boldsymbol{\zeta}}_{N_a}} \end{array} \right) \Bigg|_{\mathbf{y}=\bar{\mathbf{y}}}, \end{aligned} \quad (\text{G5})$$

2103 for  $\bar{\boldsymbol{\zeta}} \in \{\bar{\mathbf{x}}, \bar{\mathbf{y}}\}$ . The matrix  $\delta \mathbf{x}_a^T / \delta \bar{\boldsymbol{\zeta}}$  is the  $a$ -th block column of  $\delta \mathbf{x}^T / \delta \bar{\boldsymbol{\zeta}}$ . Using Layer 2, Eq. 2c and since the initial



phenotype  $\mathbf{x}_1$  is constant by assumption, we have that

2104

$$\frac{\partial \boldsymbol{\epsilon}^\top}{\partial \bar{\zeta}} \frac{\partial \mathbf{x}^\top}{\partial \boldsymbol{\epsilon}} = \left( \sum_{k=1}^{N_a} \frac{\partial \boldsymbol{\epsilon}_k^\top}{\partial \bar{\zeta}_a} \frac{\partial \mathbf{x}_j^\top}{\partial \boldsymbol{\epsilon}_k} \right) = \begin{cases} \left( \frac{\partial \boldsymbol{\epsilon}_{j-1}^\top}{\partial \bar{\zeta}_a} \frac{\partial \mathbf{x}_j^\top}{\partial \boldsymbol{\epsilon}_{j-1}} \right) & \text{for } j > 1 \\ \mathbf{0} & \text{for } j = 1 \end{cases}, \quad (\text{G6})$$

for  $\bar{\zeta} \in \{\bar{\mathbf{x}}, \bar{\mathbf{y}}\}$ , which equals the rightmost term in Eq. (G4). Thus, from Eqs. (G4), (G5), and (G6), it follows that the block matrix of total immediate effects of social partners' phenotype or genotype on a mutant's phenotype satisfies Layer 3, Eq. 3.

Noting that  $\delta \mathbf{x}_a / \delta \bar{\mathbf{z}}^\top = (\delta \mathbf{x}_a / \delta \bar{\mathbf{x}}^\top, \delta \mathbf{x}_a / \delta \bar{\mathbf{y}}^\top)$  and that evaluation of  $d\mathbf{z}_a / d\tau$  and  $\partial \boldsymbol{\epsilon}_a / \partial \tau$  at  $\mathbf{y} = \bar{\mathbf{y}}$  is  $d\bar{\mathbf{z}}_a / d\tau$  and  $\partial \bar{\boldsymbol{\epsilon}}_a / \partial \tau$  respectively, Eq. (G3) can be written as

2109

$$\frac{d\bar{\mathbf{x}}_a}{d\tau} = \left( \frac{\delta \mathbf{x}_a}{\delta \mathbf{x}_{a-1}^\top} \frac{d\bar{\mathbf{x}}_{a-1}}{d\tau} + \frac{\delta \mathbf{x}_a}{\delta \mathbf{y}_{a-1}^\top} \frac{d\bar{\mathbf{y}}_{a-1}}{d\tau} + \frac{\delta \mathbf{x}_a}{\delta \bar{\mathbf{z}}^\top} \frac{d\bar{\mathbf{z}}}{d\tau} + \frac{\delta \mathbf{x}_a}{\delta \boldsymbol{\epsilon}_{a-1}^\top} \frac{\partial \bar{\boldsymbol{\epsilon}}_{a-1}}{\partial \tau} \right) \Bigg|_{\mathbf{y}=\bar{\mathbf{y}}},$$

which is a recursion for  $d\bar{\mathbf{x}}_a / d\tau$  over  $a$ . Expanding this recursion two steps yields

2110

$$\begin{aligned} \frac{d\bar{\mathbf{x}}_a}{d\tau} = & \left\{ \frac{\delta \mathbf{x}_a}{\delta \mathbf{x}_{a-1}^\top} \left[ \frac{\delta \mathbf{x}_{a-1}}{\delta \mathbf{x}_{a-2}^\top} \left( \frac{\delta \mathbf{x}_{a-2}}{\delta \mathbf{x}_{a-3}^\top} \frac{d\bar{\mathbf{x}}_{a-3}}{d\tau} + \frac{\delta \mathbf{x}_{a-2}}{\delta \mathbf{y}_{a-3}^\top} \frac{d\bar{\mathbf{y}}_{a-3}}{d\tau} \right. \right. \right. \\ & \left. \left. \left. + \frac{\delta \mathbf{x}_{a-2}}{\delta \bar{\mathbf{z}}^\top} \frac{d\bar{\mathbf{z}}}{d\tau} + \frac{\delta \mathbf{x}_{a-2}}{\delta \boldsymbol{\epsilon}_{a-3}^\top} \frac{\partial \bar{\boldsymbol{\epsilon}}_{a-3}}{\partial \tau} \right) \right. \right. \\ & \left. \left. + \frac{\delta \mathbf{x}_{a-1}}{\delta \mathbf{y}_{a-1}^\top} \frac{d\bar{\mathbf{y}}_{a-2}}{d\tau} + \frac{\delta \mathbf{x}_{a-1}}{\delta \bar{\mathbf{z}}^\top} \frac{d\bar{\mathbf{z}}}{d\tau} + \frac{\delta \mathbf{x}_{a-1}}{\delta \boldsymbol{\epsilon}_{a-2}^\top} \frac{\partial \bar{\boldsymbol{\epsilon}}_{a-2}}{\partial \tau} \right] \right. \\ & \left. + \frac{\delta \mathbf{x}_a}{\delta \mathbf{y}_{a-1}^\top} \frac{d\bar{\mathbf{y}}_{a-1}}{d\tau} + \frac{\delta \mathbf{x}_a}{\delta \bar{\mathbf{z}}^\top} \frac{d\bar{\mathbf{z}}}{d\tau} + \frac{\delta \mathbf{x}_a}{\delta \boldsymbol{\epsilon}_{a-1}^\top} \frac{\partial \bar{\boldsymbol{\epsilon}}_{a-1}}{\partial \tau} \right\} \Bigg|_{\mathbf{y}=\bar{\mathbf{y}}}. \end{aligned}$$

Collecting the derivatives with respect to  $\tau$  yields

2111

$$\begin{aligned} \frac{d\bar{\mathbf{x}}_a}{d\tau} = & \left[ \left( \frac{\delta \mathbf{x}_a}{\delta \mathbf{x}_{a-1}^\top} \frac{\delta \mathbf{x}_{a-1}}{\delta \mathbf{x}_{a-2}^\top} \frac{\delta \mathbf{x}_{a-2}}{\delta \mathbf{x}_{a-3}^\top} \right) \frac{d\bar{\mathbf{x}}_{a-3}}{d\tau} \right. \\ & + \left( \frac{\delta \mathbf{x}_a}{\delta \mathbf{x}_{a-1}^\top} \frac{\delta \mathbf{x}_{a-1}}{\delta \mathbf{x}_{a-2}^\top} \frac{\delta \mathbf{x}_{a-2}}{\delta \mathbf{y}_{a-3}^\top} \right) \frac{d\bar{\mathbf{y}}_{a-3}}{d\tau} \\ & + \left( \frac{\delta \mathbf{x}_a}{\delta \mathbf{x}_{a-1}^\top} \frac{\delta \mathbf{x}_{a-1}}{\delta \mathbf{y}_{a-1}^\top} \right) \frac{d\bar{\mathbf{y}}_{a-2}}{d\tau} + \frac{\delta \mathbf{x}_a}{\delta \mathbf{y}_{a-1}^\top} \frac{d\bar{\mathbf{y}}_{a-1}}{d\tau} \\ & + \left( \frac{\delta \mathbf{x}_a}{\delta \mathbf{x}_{a-1}^\top} \frac{\delta \mathbf{x}_{a-1}}{\delta \mathbf{x}_{a-2}^\top} \frac{\delta \mathbf{x}_{a-2}}{\delta \boldsymbol{\epsilon}_{a-3}^\top} \right) \frac{\partial \bar{\boldsymbol{\epsilon}}_{a-3}}{\partial \tau} \\ & + \left( \frac{\delta \mathbf{x}_a}{\delta \mathbf{x}_{a-1}^\top} \frac{\delta \mathbf{x}_{a-1}}{\delta \boldsymbol{\epsilon}_{a-2}^\top} \right) \frac{\partial \bar{\boldsymbol{\epsilon}}_{a-2}}{\partial \tau} + \frac{\delta \mathbf{x}_a}{\delta \boldsymbol{\epsilon}_{a-1}^\top} \frac{\partial \bar{\boldsymbol{\epsilon}}_{a-1}}{\partial \tau} \\ & \left. + \left( \frac{\delta \mathbf{x}_a}{\delta \mathbf{x}_{a-1}^\top} \frac{\delta \mathbf{x}_{a-1}}{\delta \mathbf{x}_{a-2}^\top} \frac{\delta \mathbf{x}_{a-2}}{\delta \bar{\mathbf{z}}^\top} + \frac{\delta \mathbf{x}_a}{\delta \mathbf{x}_{a-1}^\top} \frac{\delta \mathbf{x}_{a-1}}{\delta \bar{\mathbf{z}}^\top} + \frac{\delta \mathbf{x}_a}{\delta \bar{\mathbf{z}}^\top} \right) \frac{d\bar{\mathbf{z}}}{d\tau} \right] \Bigg|_{\mathbf{y}=\bar{\mathbf{y}}}. \end{aligned}$$

2112 Inspection shows that by expanding the recursion completely and since we assume that initial phenotype does not  
 2113 evolve (i.e.,  $d\bar{\mathbf{x}}_1/d\tau = \mathbf{0}$ ), the resulting expression can be succinctly written as

$$\begin{aligned} \frac{d\bar{\mathbf{x}}_a}{d\tau} = & \left( \sum_{j=1}^{a-1} \overset{\curvearrowright}{\prod}_{k=j+1}^{a-1} \frac{\delta \mathbf{x}_{k+1}}{\delta \mathbf{x}_k^\top} \frac{\delta \mathbf{x}_{j+1}}{\delta \mathbf{y}_j^\top} \frac{d\bar{\mathbf{y}}_j}{d\tau} \right. \\ & + \sum_{j=1}^{a-1} \overset{\curvearrowright}{\prod}_{k=j+1}^{a-1} \frac{\delta \mathbf{x}_{k+1}}{\delta \mathbf{x}_k^\top} \frac{\delta \mathbf{x}_{j+1}}{\delta \boldsymbol{\epsilon}_j^\top} \frac{\partial \bar{\boldsymbol{\epsilon}}_j}{\partial \tau} \\ & \left. + \sum_{j=1}^{a-1} \overset{\curvearrowright}{\prod}_{k=j+1}^{a-1} \frac{\delta \mathbf{x}_{k+1}}{\delta \mathbf{x}_k^\top} \frac{\delta \mathbf{x}_{j+1}}{\delta \bar{\mathbf{z}}^\top} \frac{d\bar{\mathbf{z}}}{d\tau} \right) \Bigg|_{\mathbf{y}=\bar{\mathbf{y}}}, \end{aligned}$$

2114 where the  $\curvearrowright$  denotes left multiplication. Note that the products over  $k$  are the transpose of the total effects of a  
 2115 mutant's phenotype at age  $j+1$  on her phenotype at age  $a$  (Layer 4, Eq. 2). Hence,

$$\begin{aligned} \frac{d\bar{\mathbf{x}}_a}{d\tau} = & \left( \sum_{j=1}^{a-1} \frac{d\mathbf{x}_a}{d\mathbf{x}_{j+1}^\top} \frac{\delta \mathbf{x}_{j+1}}{\delta \mathbf{y}_j^\top} \frac{d\bar{\mathbf{y}}_j}{d\tau} + \sum_{j=1}^{a-1} \frac{d\mathbf{x}_a}{d\mathbf{x}_{j+1}^\top} \frac{\delta \mathbf{x}_{j+1}}{\delta \boldsymbol{\epsilon}_j^\top} \frac{\partial \bar{\boldsymbol{\epsilon}}_j}{\partial \tau} \right. \\ & \left. + \sum_{j=1}^{a-1} \frac{d\mathbf{x}_a}{d\mathbf{x}_{j+1}^\top} \frac{\delta \mathbf{x}_{j+1}}{\delta \bar{\mathbf{z}}^\top} \frac{d\bar{\mathbf{z}}}{d\tau} \right) \Bigg|_{\mathbf{y}=\bar{\mathbf{y}}}. \end{aligned} \quad (\text{G7})$$

2116 Before simplifying Eq. (G7), we introduce a series of matrices that are analogous to those already provided, based  
 2117 on Eq. (C17). The matrix of *total effects of social partners' phenotype or genotypic traits at age  $a$  on a mutant's*  
 2118 *phenotype at age  $j$*  is

$$\frac{d\mathbf{x}_j^\top}{d\bar{\boldsymbol{\zeta}}_a} \Bigg|_{\mathbf{y}=\bar{\mathbf{y}}} = \begin{cases} \left( \sum_{l=1}^{N_a} \left( \frac{\delta \mathbf{x}_l^\top}{\delta \bar{\boldsymbol{\zeta}}_a} \frac{d\mathbf{x}_j^\top}{d\mathbf{x}_l} \right) \right) \Bigg|_{\mathbf{y}=\bar{\mathbf{y}}} & \text{for } j > 1 \\ \mathbf{0} & \text{for } j = 1, \end{cases} \quad (\text{G8})$$

2119 for  $\bar{\boldsymbol{\zeta}} \in \{\bar{\mathbf{x}}, \bar{\mathbf{y}}\}$ . The block matrix of *total effects of social partners' phenotype or genotype on a mutant's phenotype* is  
 2120 thus

$$\begin{aligned} \frac{d\mathbf{x}^\top}{d\bar{\boldsymbol{\zeta}}} \Bigg|_{\mathbf{y}=\bar{\mathbf{y}}} & \equiv \left( \begin{array}{ccc} \frac{d\mathbf{x}_1^\top}{d\bar{\boldsymbol{\zeta}}_1} & \dots & \frac{d\mathbf{x}_{N_a}^\top}{d\bar{\boldsymbol{\zeta}}_1} \\ \vdots & \ddots & \vdots \\ \frac{d\mathbf{x}_1^\top}{d\bar{\boldsymbol{\zeta}}_{N_a}} & \dots & \frac{d\mathbf{x}_{N_a}^\top}{d\bar{\boldsymbol{\zeta}}_{N_a}} \end{array} \right) \Bigg|_{\mathbf{y}=\bar{\mathbf{y}}} \\ & = \left( \begin{array}{ccc} \mathbf{0} & \frac{d\mathbf{x}_2^\top}{d\bar{\boldsymbol{\zeta}}_1} & \dots & \frac{d\mathbf{x}_{N_a}^\top}{d\bar{\boldsymbol{\zeta}}_1} \\ \mathbf{0} & \frac{d\mathbf{x}_2^\top}{d\bar{\boldsymbol{\zeta}}_2} & \dots & \frac{d\mathbf{x}_{N_a}^\top}{d\bar{\boldsymbol{\zeta}}_2} \\ \vdots & \vdots & \ddots & \vdots \\ \mathbf{0} & \frac{d\mathbf{x}_2^\top}{d\bar{\boldsymbol{\zeta}}_{N_a}} & \dots & \frac{d\mathbf{x}_{N_a}^\top}{d\bar{\boldsymbol{\zeta}}_{N_a}} \end{array} \right) \Bigg|_{\mathbf{y}=\bar{\mathbf{y}}}, \end{aligned} \quad (\text{G9})$$

for  $\bar{\zeta} \in \{\bar{\mathbf{x}}, \bar{\mathbf{y}}\}$ . Then, from Eq. (G8), the block matrix in Eq. (G9) satisfies Layer 4, Eq. 5. 2121

Using Eqs. (C17) and (D9) and given the property of transpose of a product (i.e.,  $(\mathbf{AB})^T = \mathbf{B}^T \mathbf{A}^T$ ), Eq. (G7) can 2122  
be written more succinctly as 2123

$$\begin{aligned} \frac{d\bar{\mathbf{x}}_a}{d\tau} = & \left( \sum_{j=1}^{a-1} \frac{d\mathbf{x}_a}{d\mathbf{y}_j^T} \frac{d\bar{\mathbf{y}}_j}{d\tau} + \sum_{j=1}^{a-1} \frac{d\mathbf{x}_a}{d\boldsymbol{\epsilon}_j^T} \frac{\partial \bar{\boldsymbol{\epsilon}}_j}{\partial \tau} \right. \\ & \left. + \sum_{j=1}^{a-1} \frac{d\mathbf{x}_a}{d\mathbf{x}_{j+1}^T} \frac{\delta \mathbf{x}_{j+1}}{\delta \bar{\mathbf{z}}^T} \frac{d\bar{\mathbf{z}}}{d\tau} \right) \Big|_{\mathbf{y}=\bar{\mathbf{y}}} . \end{aligned}$$

Note that from Eq. (C16), we have that  $d\mathbf{x}_a/d\mathbf{y}_j^T = \mathbf{0}$  for  $j \geq a$ , from Eq. (D10), we have that  $d\mathbf{x}_a/d\boldsymbol{\epsilon}_j^T = \mathbf{0}$  for  $j \geq a$ , 2124

and from Eq. (B15), we have that  $d\mathbf{x}_a/d\mathbf{x}_{j+1}^T = \mathbf{0}$  for  $j+1 \geq a$ . Hence, the same expression holds extending the upper 2125

bounds of the sums to the last possible age: 2126

$$\begin{aligned} \frac{d\bar{\mathbf{x}}_a}{d\tau} = & \left( \sum_{j=1}^{N_a} \frac{d\mathbf{x}_a}{d\mathbf{y}_j^T} \frac{d\bar{\mathbf{y}}_j}{d\tau} + \sum_{j=1}^{N_a} \frac{d\mathbf{x}_a}{d\boldsymbol{\epsilon}_j^T} \frac{\partial \bar{\boldsymbol{\epsilon}}_j}{\partial \tau} \right. \\ & \left. + \sum_{j=1}^{N_a-1} \frac{d\mathbf{x}_a}{d\mathbf{x}_{j+1}^T} \frac{\delta \mathbf{x}_{j+1}}{\delta \bar{\mathbf{z}}^T} \frac{d\bar{\mathbf{z}}}{d\tau} \right) \Big|_{\mathbf{y}=\bar{\mathbf{y}}} . \end{aligned}$$

Changing the sum index for the rightmost sum yields 2127

$$\frac{d\bar{\mathbf{x}}_a}{d\tau} = \left( \sum_{j=1}^{N_a} \frac{d\mathbf{x}_a}{d\mathbf{y}_j^T} \frac{d\bar{\mathbf{y}}_j}{d\tau} + \sum_{j=1}^{N_a} \frac{d\mathbf{x}_a}{d\boldsymbol{\epsilon}_j^T} \frac{\partial \bar{\boldsymbol{\epsilon}}_j}{\partial \tau} + \sum_{j=2}^{N_a} \frac{d\mathbf{x}_a}{d\mathbf{x}_j^T} \frac{\delta \mathbf{x}_j}{\delta \bar{\mathbf{z}}^T} \frac{d\bar{\mathbf{z}}}{d\tau} \right) \Big|_{\mathbf{y}=\bar{\mathbf{y}}} .$$

Expanding the matrix calculus notation for the entries of  $\bar{\mathbf{z}}$  in the rightmost sum yields 2128

$$\begin{aligned} \frac{d\bar{\mathbf{x}}_a}{d\tau} = & \left( \sum_{j=1}^{N_a} \frac{d\mathbf{x}_a}{d\mathbf{y}_j^T} \frac{d\bar{\mathbf{y}}_j}{d\tau} + \sum_{j=1}^{N_a} \frac{d\mathbf{x}_a}{d\boldsymbol{\epsilon}_j^T} \frac{\partial \bar{\boldsymbol{\epsilon}}_j}{\partial \tau} \right. \\ & \left. + \sum_{j=2}^{N_a} \frac{d\mathbf{x}_a}{d\mathbf{x}_j^T} \frac{\delta \mathbf{x}_j}{\delta \bar{\mathbf{x}}^T} \frac{d\bar{\mathbf{x}}}{d\tau} + \sum_{j=2}^{N_a} \frac{d\mathbf{x}_a}{d\mathbf{x}_j^T} \frac{\delta \mathbf{x}_j}{\delta \bar{\mathbf{y}}^T} \frac{d\bar{\mathbf{y}}}{d\tau} \right) \Big|_{\mathbf{y}=\bar{\mathbf{y}}} . \end{aligned}$$

Expanding again the matrix calculus notation for the entries of  $\bar{\mathbf{x}}$  and  $\bar{\mathbf{y}}$  in the two rightmost sums yields 2129

$$\begin{aligned} \frac{d\bar{\mathbf{x}}_a}{d\tau} = & \left( \sum_{j=1}^{N_a} \frac{d\mathbf{x}_a}{d\mathbf{y}_j^T} \frac{d\bar{\mathbf{y}}_j}{d\tau} + \sum_{j=1}^{N_a} \frac{d\mathbf{x}_a}{d\boldsymbol{\epsilon}_j^T} \frac{\partial \bar{\boldsymbol{\epsilon}}_j}{\partial \tau} \right. \\ & \left. + \sum_{l=1}^{N_a} \sum_{j=2}^{N_a} \frac{d\mathbf{x}_a}{d\mathbf{x}_j^T} \frac{\delta \mathbf{x}_j}{\delta \bar{\mathbf{x}}_l^T} \frac{d\bar{\mathbf{x}}_l}{d\tau} + \sum_{l=1}^{N_a} \sum_{j=2}^{N_a} \frac{d\mathbf{x}_a}{d\mathbf{x}_j^T} \frac{\delta \mathbf{x}_j}{\delta \bar{\mathbf{y}}_l^T} \frac{d\bar{\mathbf{y}}_l}{d\tau} \right) \Big|_{\mathbf{y}=\bar{\mathbf{y}}} . \end{aligned}$$

Using the transpose of the matrix in Eq. (G8) in the two rightmost terms, noting that  $\delta \mathbf{x}_j/\delta \bar{\mathbf{x}}_l^T = \mathbf{0}$  and  $\delta \mathbf{x}_j/\delta \bar{\mathbf{y}}_l^T = \mathbf{0}$  2130

for  $j = 1$  (from Eq. G5), yields 2131

$$\begin{aligned} \frac{d\bar{\mathbf{x}}_a}{d\tau} = & \left( \sum_{j=1}^{N_a} \frac{d\mathbf{x}_a}{d\mathbf{y}_j^T} \frac{d\bar{\mathbf{y}}_j}{d\tau} + \sum_{j=1}^{N_a} \frac{d\mathbf{x}_a}{d\boldsymbol{\epsilon}_j^T} \frac{\partial \bar{\boldsymbol{\epsilon}}_j}{\partial \tau} \right. \\ & \left. + \sum_{l=1}^{N_a} \frac{d\mathbf{x}_a}{d\bar{\mathbf{x}}_l^T} \frac{d\bar{\mathbf{x}}_l}{d\tau} + \sum_{l=1}^{N_a} \frac{d\mathbf{x}_a}{d\bar{\mathbf{y}}_l^T} \frac{d\bar{\mathbf{y}}_l}{d\tau} \right) \Big|_{\mathbf{y}=\bar{\mathbf{y}}} . \end{aligned}$$

2132 Applying matrix calculus notation to each term yields

$$\frac{d\bar{x}_a}{d\tau} = \left( \frac{d\mathbf{x}_a}{d\mathbf{y}^\top} \frac{d\bar{\mathbf{y}}}{d\tau} + \frac{d\mathbf{x}_a}{d\boldsymbol{\epsilon}^\top} \frac{\partial \bar{\boldsymbol{\epsilon}}}{\partial \tau} + \frac{d\mathbf{x}_a}{d\bar{\mathbf{x}}^\top} \frac{d\bar{\mathbf{x}}}{d\tau} + \frac{d\mathbf{x}_a}{d\bar{\mathbf{y}}^\top} \frac{d\bar{\mathbf{y}}}{d\tau} \right) \Big|_{\mathbf{y}=\bar{\mathbf{y}}},$$

2133 for  $a \in \{2, \dots, N_a\}$ . Since  $d\bar{x}_1/d\tau = \mathbf{0}$ , it follows that

$$\frac{d\bar{\mathbf{x}}}{d\tau} = \left( \frac{d\mathbf{x}}{d\mathbf{y}^\top} \frac{d\bar{\mathbf{y}}}{d\tau} + \frac{d\mathbf{x}}{d\boldsymbol{\epsilon}^\top} \frac{\partial \bar{\boldsymbol{\epsilon}}}{\partial \tau} + \frac{d\mathbf{x}}{d\bar{\mathbf{x}}^\top} \frac{d\bar{\mathbf{x}}}{d\tau} + \frac{d\mathbf{x}}{d\bar{\mathbf{y}}^\top} \frac{d\bar{\mathbf{y}}}{d\tau} \right) \Big|_{\mathbf{y}=\bar{\mathbf{y}}}, \quad (\text{G10})$$

2134 which contains our desired  $d\bar{\mathbf{x}}/d\tau$  on both sides of the equation.

2135 The matrix premultiplying  $d\bar{\mathbf{x}}/d\tau$  on the right-hand side of Eq. (G10) is  $d\mathbf{x}/d\bar{\mathbf{x}}^\top|_{\mathbf{y}=\bar{\mathbf{y}}}$ , which is square. We now  
 2136 make use of our assumption that the absolute value of all the eigenvalues of  $d\mathbf{x}/d\bar{\mathbf{x}}^\top|_{\mathbf{y}=\bar{\mathbf{y}}}$  is strictly less than one, which  
 2137 guarantees that the resident geno-phenotype is socio-devo stable (Eq. S3 and following text). Given this property of  
 2138  $d\mathbf{x}/d\bar{\mathbf{x}}^\top|_{\mathbf{y}=\bar{\mathbf{y}}}$ , then  $\mathbf{I} - d\mathbf{x}/d\bar{\mathbf{x}}^\top|_{\mathbf{y}=\bar{\mathbf{y}}}$  is invertible. Hence, we can define the transpose of the matrix of *stabilized effects of*  
 2139 *a focal individual's phenotype on a social partners' phenotype* (second equality of Layer 5, Eq. 1). Thus, solving for  
 2140  $d\bar{\mathbf{x}}/d\tau$  in Eq. (G10), we finally obtain an equation describing the evolutionary dynamics of the phenotype

$$\frac{d\bar{\mathbf{x}}}{d\tau} = \left[ \frac{\mathbf{s}\mathbf{x}}{\mathbf{s}\bar{\mathbf{x}}^\top} \left( \frac{d\mathbf{x}}{d\mathbf{y}^\top} + \frac{d\mathbf{x}}{d\bar{\mathbf{y}}^\top} \right) \frac{d\bar{\mathbf{y}}}{d\tau} + \frac{\mathbf{s}\mathbf{x}}{\mathbf{s}\bar{\mathbf{x}}^\top} \frac{d\mathbf{x}}{d\boldsymbol{\epsilon}^\top} \frac{\partial \bar{\boldsymbol{\epsilon}}}{\partial \tau} \right] \Big|_{\mathbf{y}=\bar{\mathbf{y}}}.$$

2141 Let us momentarily write  $\mathbf{x} = \tilde{\mathbf{g}}(\mathbf{y}, \bar{\mathbf{y}})$  for some differentiable function  $\tilde{\mathbf{g}}$  to highlight the dependence of a mutant's  
 2142 phenotype  $\mathbf{x}$  on her genotype  $\mathbf{y}$  and on the genotype  $\bar{\mathbf{y}}$  of resident social partners. Consider the resident phenotype that  
 2143 develops in the context of the mutant genotype, denoted by  $\check{\mathbf{x}} = \tilde{\mathbf{g}}(\bar{\mathbf{y}}, \mathbf{y})$ . Hence,

$$\frac{d\check{\mathbf{x}}}{d\mathbf{y}^\top} \Big|_{\mathbf{y}=\bar{\mathbf{y}}} = \frac{d\tilde{\mathbf{g}}(\bar{\mathbf{y}}, \mathbf{y})}{d\mathbf{y}^\top} \Big|_{\mathbf{y}=\bar{\mathbf{y}}} = \frac{d\tilde{\mathbf{g}}(\mathbf{y}, \bar{\mathbf{y}})}{d\bar{\mathbf{y}}^\top} \Big|_{\mathbf{y}=\bar{\mathbf{y}}} = \frac{d\mathbf{x}}{d\bar{\mathbf{y}}^\top} \Big|_{\mathbf{y}=\bar{\mathbf{y}}}, \quad (\text{G11})$$

2144 where the second equality follows by exchanging dummy variables. Then, the transpose of the matrix of *total social*  
 2145 *effects of a mutant's genotype on her and a partner's phenotypes* is

$$\begin{aligned} \frac{d(\mathbf{x} + \check{\mathbf{x}})}{d\mathbf{y}^\top} \Big|_{\mathbf{y}=\bar{\mathbf{y}}} &= \left( \frac{d\mathbf{x}}{d\mathbf{y}^\top} + \frac{d\check{\mathbf{x}}}{d\mathbf{y}^\top} \right) \Big|_{\mathbf{y}=\bar{\mathbf{y}}} \\ &= \left( \frac{d\mathbf{x}}{d\mathbf{y}^\top} + \frac{d\mathbf{x}}{d\bar{\mathbf{y}}^\top} \right) \Big|_{\mathbf{y}=\bar{\mathbf{y}}} \in \mathbb{R}^{N_a N_p \times N_a N_g}. \end{aligned} \quad (\text{G12})$$

2146 Similarly, let us momentarily write  $\mathbf{x} = \tilde{\tilde{\mathbf{g}}}(\mathbf{x}, \bar{\mathbf{x}})$  for some differentiable function  $\tilde{\tilde{\mathbf{g}}}$  to highlight the dependence of a  
 2147 mutant's phenotype  $\mathbf{x}$  on her (developmentally earlier) phenotype  $\mathbf{x}$  and on the phenotype  $\bar{\mathbf{x}}$  of resident social partners.  
 2148 Consider the resident phenotype that develops in the context of the mutant phenotype, denoted by  $\check{\check{\mathbf{x}}} = \tilde{\tilde{\mathbf{g}}}(\bar{\mathbf{x}}, \mathbf{x})$ . Hence,

$$\frac{d\check{\check{\mathbf{x}}}}{d\bar{\mathbf{x}}^\top} \Big|_{\mathbf{y}=\bar{\mathbf{y}}} = \frac{d\tilde{\tilde{\mathbf{g}}}(\bar{\mathbf{x}}, \mathbf{x})}{d\bar{\mathbf{x}}^\top} \Big|_{\mathbf{y}=\bar{\mathbf{y}}} = \frac{d\tilde{\tilde{\mathbf{g}}}(\mathbf{x}, \bar{\mathbf{x}})}{d\mathbf{x}^\top} \Big|_{\mathbf{y}=\bar{\mathbf{y}}} = \frac{d\mathbf{x}}{d\bar{\mathbf{x}}^\top} \Big|_{\mathbf{y}=\bar{\mathbf{y}}}, \quad (\text{G13})$$

2149 where the second equality follows by exchanging dummy variables. Then, the transpose of the matrix of *total social*  
 2150 *effects of a mutant's phenotype on her and a partner's phenotypes* is

$$\frac{d(\mathbf{x} + \check{\check{\mathbf{x}}})}{d\bar{\mathbf{x}}^\top} \Big|_{\mathbf{y}=\bar{\mathbf{y}}} = \left( \frac{d\mathbf{x}}{d\bar{\mathbf{x}}^\top} + \frac{d\check{\check{\mathbf{x}}}}{d\bar{\mathbf{x}}^\top} \right) \Big|_{\mathbf{y}=\bar{\mathbf{y}}}$$

$$= \left( \frac{d\mathbf{x}}{d\mathbf{x}^\top} + \frac{d\mathbf{x}}{d\bar{\mathbf{x}}^\top} \right) \Big|_{y=\bar{y}} \in \mathbb{R}^{N_a N_p \times N_a N_p}. \quad (\text{G14})$$

Thus, from Eq. (G13) and the second equality of Layer 5, Eq. 1, the transpose of the matrix of stabilized effects of a focal individual's phenotype on social partners' phenotype may also be written as

$$\begin{aligned} \frac{s\mathbf{x}}{s\bar{\mathbf{x}}^\top} \Big|_{y=\bar{y}} &= \left( \mathbf{I} - \frac{d\check{\mathbf{x}}}{d\mathbf{x}^\top} \Big|_{y=\bar{y}} \right)^{-1} \\ &= \sum_{\theta=1}^{\infty} \left( \frac{d\check{\mathbf{x}}}{d\mathbf{x}^\top} \right)^{\theta-1} \Big|_{y=\bar{y}} \in \mathbb{R}^{N_a N_p \times N_a N_p}, \end{aligned}$$

where the last equality follows from the geometric series of matrices. This equation is the first and third equalities of Layer 5, Eq. 1.

Therefore, using Layer 5, Eq. 2 and Layer 5, Eq. 2b, the evolutionary dynamics of the phenotype are given by

$$\begin{aligned} \frac{d\bar{\mathbf{x}}}{d\tau} &= \left( \frac{s\mathbf{x}}{s\bar{\mathbf{x}}^\top} \frac{d(\mathbf{x} + \check{\mathbf{x}})}{d\mathbf{y}^\top} \frac{d\bar{\mathbf{y}}}{d\tau} + \frac{s\mathbf{x}}{s\bar{\mathbf{x}}^\top} \frac{d\mathbf{x}}{d\boldsymbol{\epsilon}^\top} \frac{\partial \bar{\boldsymbol{\epsilon}}}{\partial \tau} \right) \Big|_{y=\bar{y}} \\ &\approx \left( \iota \frac{s\mathbf{x}}{s\mathbf{y}^\top} \mathbf{H}_y \frac{dw}{d\mathbf{y}} + \frac{s\mathbf{x}}{s\boldsymbol{\epsilon}^\top} \frac{\partial \bar{\boldsymbol{\epsilon}}}{\partial \tau} \right) \Big|_{y=\bar{y}} \\ &= \left( \iota \mathbf{L}_{xy} \frac{dw}{d\mathbf{y}} + \frac{s\mathbf{x}}{s\boldsymbol{\epsilon}^\top} \frac{\partial \bar{\boldsymbol{\epsilon}}}{\partial \tau} \right) \Big|_{y=\bar{y}}, \end{aligned} \quad (\text{G15})$$

where the second line follows by using Eq. (G1) in the limit  $\Delta\tau \rightarrow 0$ , and the third line follows from Layer 6, Eq. 13. The first line of Eq. G15 describing evolutionary change of the phenotype in terms of evolutionary change of the genotype is a generalization of previous equations describing the evolution of a multivariate phenotype in terms of allele frequency change (e.g., the first equation on p. 49 of Engen and Sæther 2021). Eq. (G15) is Layer 7, Eq. 5 for  $\zeta = \mathbf{x}$ . Using the third line of Layer 4, Eq. 22 and Layer 6, Eq. 11 yields Layer 7, Eq. 4 for  $\zeta = \mathbf{x}$ , whereas using the fourth line of Layer 4, Eq. 22 and Layer 6, Eq. 12 yields Layer 7, Eq. 1a for  $\zeta = \mathbf{x}$ .

## Appendix H. Evolutionary dynamics of the geno-phenotype

### Appendix H.1. In terms of total genotypic selection

Here we obtain an equation describing the evolutionary dynamics of the resident geno-phenotype, that is,  $d\bar{\mathbf{z}}/d\tau$ . In this section, we write such an equation in terms of the total genotypic selection. Since  $d\bar{\mathbf{z}}/d\tau = (d\bar{\mathbf{x}}/d\tau; d\bar{\mathbf{y}}/d\tau)$ , from Eqs. (G15) and (S10a), we can write the evolutionary dynamics of the resident geno-phenotype  $\bar{\mathbf{z}}$  as

$$\frac{d\bar{\mathbf{z}}}{d\tau} \approx \left[ \iota \begin{pmatrix} \mathbf{L}_{xy} \\ \mathbf{H}_y \end{pmatrix} \frac{dw}{d\mathbf{y}} + \begin{pmatrix} s\mathbf{x} \\ \mathbf{0} \end{pmatrix} \frac{\partial \bar{\boldsymbol{\epsilon}}}{\partial \tau} \right] \Big|_{y=\bar{y}}. \quad (\text{H1})$$

Using Layer 6, Eq. 13 and Layer 5, Eq. 3, this is

$$\frac{d\bar{\mathbf{z}}}{d\tau} \approx \left[ \iota \begin{pmatrix} s\mathbf{x} \\ s\mathbf{y}^\top \\ s\mathbf{y} \\ s\mathbf{y}^\top \end{pmatrix} \mathbf{H}_y \frac{dw}{d\mathbf{y}} + \begin{pmatrix} s\mathbf{x} \\ s\boldsymbol{\epsilon}^\top \\ s\mathbf{y} \\ s\boldsymbol{\epsilon}^\top \end{pmatrix} \frac{\partial \bar{\boldsymbol{\epsilon}}}{\partial \tau} \right] \Big|_{y=\bar{y}}.$$

2168 Using Layer 5, Eq. 4, this reduces to

$$\frac{d\bar{\mathbf{z}}}{d\tau} \approx \left( \iota \frac{\mathbf{s}\mathbf{z}}{\mathbf{s}\mathbf{y}^\top} \mathbf{H}_y \frac{dw}{dy} + \frac{\mathbf{s}\mathbf{z}}{\mathbf{s}\mathbf{e}^\top} \frac{\partial \bar{\mathbf{e}}}{\partial \tau} \right) \Bigg|_{y=\bar{y}}.$$

2169 Using Layer 6, Eq. 13 yields Layer 7, Eq. 5 for  $\zeta = \mathbf{z}$ . Using the third line of Layer 4, Eq. 22 and Layer 6, Eq. 11  
 2170 yields Layer 7, Eq. 4 for  $\zeta = \mathbf{z}$ , whereas using the fourth line of Layer 4, Eq. 22 and Layer 6, Eq. 12 yields Layer 7,  
 2171 Eq. 1a for  $\zeta = \mathbf{z}$ .

2172 In contrast to other arrangements, the premultiplying matrix  $\mathbf{L}_{zy}$  is non-singular if  $\mathbf{H}_y$  is non-singular. Indeed, if

$$\frac{\mathbf{s}\mathbf{z}}{\mathbf{s}\mathbf{y}^\top} \Bigg|_{y=\bar{y}} \mathbf{r} = \mathbf{0}$$

2173 for some vector  $\mathbf{r}$ , then from Layer 5, Eq. 4a and Layer 5, Eq. 3b we have

$$\left( \begin{array}{c} \mathbf{s}\mathbf{x} \\ \mathbf{s}\mathbf{y}^\top \\ \mathbf{I} \end{array} \right) \Bigg|_{y=\bar{y}} \mathbf{r} = \mathbf{0}.$$

2174 Doing the multiplication yields

$$\left( \begin{array}{c} \mathbf{s}\mathbf{x} \\ \mathbf{s}\mathbf{y}^\top \Big|_{y=\bar{y}} \mathbf{r} \\ \mathbf{r} \end{array} \right) = \mathbf{0},$$

2175 which implies that  $\mathbf{r} = \mathbf{0}$ , so  $\mathbf{s}\mathbf{z}/\mathbf{s}\mathbf{y}^\top|_{y=\bar{y}}$  is non-singular. Thus,  $\mathbf{L}_{zy}$  is non-singular if  $\mathbf{H}_y$  is non-singular.

## 2176 Appendix H.2. In terms of total selection on the geno-phenotype

2177 Here we write the evolutionary dynamics of the geno-phenotype in terms of the total selection gradient of the  
 2178 geno-phenotype.

2179 First, using Layer 6, Eq. 2, we define the *mechanistic additive genetic covariance matrix of the unperturbed*  
 2180 *geno-phenotype*  $\hat{\mathbf{z}} \equiv (\bar{\mathbf{x}}; \mathbf{y})$  as

$$\mathbf{H}_{\hat{\mathbf{z}}} \equiv \text{cov}[\mathbf{b}_{\hat{\mathbf{z}}}, \mathbf{b}_{\hat{\mathbf{z}}}] = \left( \frac{d\hat{\mathbf{z}}}{d\mathbf{y}^\top} \mathbf{H}_y \frac{d\hat{\mathbf{z}}}{d\mathbf{y}} \right) \Bigg|_{y=\bar{y}} \\ \in \mathbb{R}^{N_a(N_p+N_g) \times N_a(N_p+N_g)}.$$

2181 By definition of  $\hat{\mathbf{z}}$ , we have

$$\mathbf{H}_{\hat{\mathbf{z}}} = \left[ \left( \begin{array}{c} \frac{d\bar{\mathbf{x}}}{d\mathbf{y}^\top} \\ \frac{d\mathbf{y}}{d\mathbf{y}^\top} \end{array} \right) \mathbf{H}_y \left( \begin{array}{cc} \frac{d\bar{\mathbf{x}}^\top}{d\mathbf{y}} & \frac{d\mathbf{y}^\top}{d\mathbf{y}} \end{array} \right) \right] \Bigg|_{y=\bar{y}}.$$

2182 From Eq. (S10c), the resident phenotype is independent of mutant genotype, so

$$\mathbf{H}_{\hat{\mathbf{z}}} = \left[ \left( \begin{array}{c} \mathbf{0} \\ \mathbf{I} \end{array} \right) \mathbf{H}_y \left( \begin{array}{cc} \mathbf{0} & \mathbf{I} \end{array} \right) \right] \Bigg|_{y=\bar{y}}.$$

Doing the matrix multiplication yields

2183

$$\mathbf{H}_z = \left[ \begin{pmatrix} \mathbf{0} \\ \mathbf{I} \end{pmatrix} \begin{pmatrix} \mathbf{0} & \mathbf{H}_y \end{pmatrix} \right]_{y=\bar{y}} = \begin{pmatrix} \mathbf{0} & \mathbf{0} \\ \mathbf{0} & \mathbf{H}_y \end{pmatrix}. \quad (\text{H2})$$

The matrix  $\mathbf{H}_z$  is singular because the unperturbed geno-phenotype includes the genotype (i.e.,  $d\hat{\mathbf{z}}^T/d\mathbf{y}|_{y=\bar{y}}$  has fewer rows than columns). For this reason, the matrix  $\mathbf{H}_z$  would still be singular even if the zero block entries in Eq. (H2) were non-zero (i.e., if  $d\bar{\mathbf{x}}^T/d\mathbf{y}|_{y=\bar{y}} \neq \mathbf{0}$ ).

2184

2185

2186

Now, we write an alternative factorization of  $\mathbf{L}_z$  in terms of  $\mathbf{H}_z$ . Using Layer 4, Eq. 9 and Layer 5, Eq. 5, consider the matrix

2187

2188

$$\begin{aligned} & \left( \frac{\mathbf{s}\mathbf{z}}{\mathbf{s}\mathbf{z}^T} \mathbf{H}_z \frac{d\mathbf{z}^T}{d\mathbf{z}} \right)_{y=\bar{y}} \\ &= \left[ \begin{pmatrix} \frac{\mathbf{s}\mathbf{x}}{\mathbf{s}\mathbf{x}^T} & \frac{\mathbf{s}\mathbf{x}}{\mathbf{s}\mathbf{y}^T} \\ \mathbf{0} & \mathbf{I} \end{pmatrix} \begin{pmatrix} \mathbf{0} & \mathbf{0} \\ \mathbf{0} & \mathbf{H}_y \end{pmatrix} \begin{pmatrix} \frac{d\mathbf{x}^T}{d\mathbf{x}} & \mathbf{0} \\ \frac{d\mathbf{x}^T}{d\mathbf{y}} & \mathbf{I} \end{pmatrix} \right]_{y=\bar{y}}. \end{aligned}$$

Doing the matrix multiplication yields

2189

$$\begin{aligned} \left( \frac{\mathbf{s}\mathbf{z}}{\mathbf{s}\mathbf{z}^T} \mathbf{H}_z \frac{d\mathbf{z}^T}{d\mathbf{z}} \right)_{y=\bar{y}} &= \left[ \begin{pmatrix} \frac{\mathbf{s}\mathbf{x}}{\mathbf{s}\mathbf{x}^T} & \frac{\mathbf{s}\mathbf{x}}{\mathbf{s}\mathbf{y}^T} \\ \mathbf{0} & \mathbf{I} \end{pmatrix} \begin{pmatrix} \mathbf{0} & \mathbf{0} \\ \mathbf{H}_y \frac{d\mathbf{x}^T}{d\mathbf{y}} & \mathbf{H}_y \end{pmatrix} \right]_{y=\bar{y}} \\ &= \begin{pmatrix} \frac{\mathbf{s}\mathbf{x}}{\mathbf{s}\mathbf{y}^T} \mathbf{H}_y \frac{d\mathbf{x}^T}{d\mathbf{y}} & \frac{\mathbf{s}\mathbf{x}}{\mathbf{s}\mathbf{y}^T} \mathbf{H}_y \\ \mathbf{H}_y \frac{d\mathbf{x}^T}{d\mathbf{y}} & \mathbf{H}_y \end{pmatrix}_{y=\bar{y}}. \end{aligned}$$

Using Layer 5, Eq. 3b, we have

2190

$$\left( \frac{\mathbf{s}\mathbf{z}}{\mathbf{s}\mathbf{z}^T} \mathbf{H}_z \frac{d\mathbf{z}^T}{d\mathbf{z}} \right)_{y=\bar{y}} = \begin{pmatrix} \frac{\mathbf{s}\mathbf{x}}{\mathbf{s}\mathbf{y}^T} \mathbf{H}_y \frac{d\mathbf{x}^T}{d\mathbf{y}} & \frac{\mathbf{s}\mathbf{x}}{\mathbf{s}\mathbf{y}^T} \mathbf{H}_y \frac{d\mathbf{y}^T}{d\mathbf{y}} \\ \frac{\mathbf{s}\mathbf{y}}{\mathbf{s}\mathbf{y}^T} \mathbf{H}_y \frac{d\mathbf{x}^T}{d\mathbf{y}} & \frac{\mathbf{s}\mathbf{y}}{\mathbf{s}\mathbf{y}^T} \mathbf{H}_y \frac{d\mathbf{y}^T}{d\mathbf{y}} \end{pmatrix}_{y=\bar{y}}.$$

Notice that the matrix on the right-hand side is

2191

$$\left( \frac{\mathbf{s}\mathbf{z}}{\mathbf{s}\mathbf{y}^T} \mathbf{H}_y \frac{d\mathbf{z}^T}{d\mathbf{y}} \right)_{y=\bar{y}} = \mathbf{L}_z.$$

Hence, we obtain an alternative factorization for  $\mathbf{L}_z$  as

2192

$$\mathbf{L}_z = \left( \frac{\mathbf{s}\mathbf{z}}{\mathbf{s}\mathbf{z}^T} \mathbf{H}_z \frac{d\mathbf{z}^T}{d\mathbf{z}} \right)_{y=\bar{y}}.$$

Thus, we can write the selection response of the geno-phenotype (in the form of Layer 7, Eq. 4) as

2193

$$\iota \mathbf{L}_z \frac{\delta w}{\delta \mathbf{z}} \Big|_{y=\bar{y}} = \iota \left( \frac{\mathbf{s}\mathbf{z}}{\mathbf{s}\mathbf{z}^T} \mathbf{H}_z \frac{d\mathbf{z}^T}{d\mathbf{z}} \frac{\delta w}{\delta \mathbf{z}} \right)_{y=\bar{y}}.$$

2194 Using the relationship between the total and total immediate selection gradients of the geno-phenotype (second line  
2195 of Layer 4, Eq. 24), this becomes

$$t\mathbf{L}_{z\mathbf{z}} \left. \frac{\delta w}{\delta \mathbf{z}} \right|_{\mathbf{y}=\bar{\mathbf{y}}} = t \left( \frac{\mathbf{S}\mathbf{Z}}{\mathbf{S}\mathbf{Z}^T} \mathbf{H}_{\hat{\mathbf{z}}} \frac{dw}{d\mathbf{z}} \right) \Big|_{\mathbf{y}=\bar{\mathbf{y}}}.$$

2196 We can further simplify this equation by noticing the following. Using Layer 6, Eq. 10 and  $\hat{\mathbf{z}} = (\bar{\mathbf{x}}; \mathbf{y})$ , we have  
2197 that the *mechanistic additive socio-genetic cross-covariance matrix of the geno-phenotype and the unperturbed geno-*  
2198 *phenotype* is

$$\mathbf{L}_{z\hat{\mathbf{z}}} = \left( \frac{\mathbf{S}\mathbf{Z}}{\mathbf{S}\mathbf{y}^T} \mathbf{H}_{\mathbf{y}} \frac{d\hat{\mathbf{z}}^T}{d\mathbf{y}} \right) \Big|_{\mathbf{y}=\bar{\mathbf{y}}} \in \mathbb{R}^{N_a(N_p+N_g) \times N_a(N_p+N_g)}. \quad (\text{H3})$$

2199 Expanding, we have

$$\mathbf{L}_{z\hat{\mathbf{z}}} = \left[ \begin{array}{c} \left( \frac{\mathbf{S}\mathbf{X}}{\mathbf{S}\mathbf{y}^T} \right) \\ \left( \frac{\mathbf{S}\mathbf{y}}{\mathbf{S}\mathbf{y}^T} \right) \end{array} \right] \mathbf{H}_{\mathbf{y}} \left( \frac{d\bar{\mathbf{x}}^T}{d\mathbf{y}} \quad \frac{d\mathbf{y}^T}{d\mathbf{y}} \right) \Big|_{\mathbf{y}=\bar{\mathbf{y}}}.$$

2200 Using Layer 5, Eq. 3b and since the resident phenotype does not depend on mutant genotype, then

$$\mathbf{L}_{z\hat{\mathbf{z}}} = \left[ \begin{array}{c} \left( \frac{\mathbf{S}\mathbf{X}}{\mathbf{S}\mathbf{y}^T} \right) \\ \mathbf{I} \end{array} \right] \mathbf{H}_{\mathbf{y}} \left( \mathbf{0} \quad \mathbf{I} \right) \Big|_{\mathbf{y}=\bar{\mathbf{y}}}.$$

2201 Doing the matrix multiplication yields

$$\mathbf{L}_{z\hat{\mathbf{z}}} = \left[ \begin{array}{c} \left( \frac{\mathbf{S}\mathbf{X}}{\mathbf{S}\mathbf{y}^T} \right) \\ \mathbf{I} \end{array} \right] \left( \mathbf{0} \quad \mathbf{H}_{\mathbf{y}} \right) \Big|_{\mathbf{y}=\bar{\mathbf{y}}} = \left( \mathbf{0} \quad \frac{\mathbf{S}\mathbf{X}}{\mathbf{S}\mathbf{y}^T} \mathbf{H}_{\mathbf{y}} \right) \Big|_{\mathbf{y}=\bar{\mathbf{y}}}.$$

2202 Notice that the last matrix equals

$$\left( \frac{\mathbf{S}\mathbf{Z}}{\mathbf{S}\mathbf{Z}^T} \mathbf{H}_{\hat{\mathbf{z}}} \right) \Big|_{\mathbf{y}=\bar{\mathbf{y}}}.$$

2203 We can then write the evolutionary dynamics of the resident geno-phenotype  $\bar{\mathbf{z}}$  in terms of the total selection  
2204 gradient of the geno-phenotype as

$$\frac{d\bar{\mathbf{z}}}{d\tau} \approx \left( t\mathbf{L}_{z\hat{\mathbf{z}}} \frac{dw}{d\mathbf{z}} + \frac{\mathbf{S}\mathbf{Z}}{\mathbf{S}\mathbf{Z}^T} \frac{\partial \bar{\mathbf{e}}}{\partial \tau} \right) \Big|_{\mathbf{y}=\bar{\mathbf{y}}}. \quad (\text{H4})$$

2205 The cross-covariance matrix  $\mathbf{L}_{z\hat{\mathbf{z}}}$  is singular because  $d\hat{\mathbf{z}}^T/d\mathbf{y}|_{\mathbf{y}=\bar{\mathbf{y}}}$  has fewer rows than columns since the unperturbed  
2206 geno-phenotype includes the genotype. For this reason,  $\mathbf{L}_{z\hat{\mathbf{z}}}$  would still be singular even if the zero block entries in  
2207 Eq. (H3) were non-zero (i.e., if  $d\bar{\mathbf{x}}^T/d\mathbf{y}|_{\mathbf{y}=\bar{\mathbf{y}}} \neq \mathbf{0}$ ). Then, evolutionary equilibria of the geno-phenotype do not imply  
2208 absence of total selection on the geno-phenotype, even if exogenous plastic response is absent.



## Appendix I. Evolutionary dynamics of the environment

2209

### Appendix I.1. In terms of endogenous and exogenous environmental change

2210

Here we derive an equation describing the evolutionary dynamics of the environment. Let  $\bar{\mathbf{z}}(\tau)$  be the resident geno-phenotype at evolutionary time  $\tau$ , specifically at the point where the socio-devo stable resident is at carrying capacity, marked in Fig. 3. From the environmental constraint (2), the  $i$ -th environmental trait experienced by a mutant of age  $a$  at such evolutionary time  $\tau$  is  $\epsilon_{ia} = h_{ia}(\mathbf{z}_a(\tau), \bar{\mathbf{z}}(\tau), \tau)$ . Then, evolutionary change in the  $i$ -th environmental trait experienced by residents at age  $a \in \{1, \dots, N_a\}$  is

2215

$$\frac{\Delta \bar{\epsilon}_{ia}}{\Delta \tau} = \frac{1}{\Delta \tau} \left[ h_{ia}(\mathbf{z}_a(\tau + \Delta \tau), \bar{\mathbf{z}}(\tau + \Delta \tau), \tau + \Delta \tau) - h_{ia}(\mathbf{z}_a(\tau), \bar{\mathbf{z}}(\tau), \tau) \right] \Big|_{\mathbf{y}=\bar{\mathbf{y}}}.$$

Taking the limit as  $\Delta \tau \rightarrow 0$ , this becomes

2216

$$\frac{d\bar{\epsilon}_{ia}}{d\tau} = \frac{dh_{ia}(\mathbf{z}_a(\tau), \bar{\mathbf{z}}(\tau), \tau)}{d\tau} \Big|_{\mathbf{y}=\bar{\mathbf{y}}}.$$

Applying the chain rule, we obtain

2217

$$\begin{aligned} \frac{d\bar{\epsilon}_{ia}}{d\tau} = & \left( \sum_{j=1}^{N_p} \frac{\partial h_{ia}}{\partial x_{ja}} \frac{dx_{ja}}{d\tau} + \sum_{j=1}^{N_g} \frac{\partial h_{ia}}{\partial y_{ja}} \frac{dy_{ja}}{d\tau} + \sum_{k=1}^{N_a} \sum_{j=1}^{N_p} \frac{\partial h_{ia}}{\partial \bar{x}_{jk}} \frac{d\bar{x}_{jk}}{d\tau} \right. \\ & \left. + \sum_{k=1}^{N_a} \sum_{j=1}^{N_g} \frac{\partial h_{ia}}{\partial \bar{y}_{jk}} \frac{d\bar{y}_{jk}}{d\tau} + \frac{\partial h_{ia}}{\partial \tau} \right) \Big|_{\mathbf{y}=\bar{\mathbf{y}}}. \end{aligned}$$

Applying matrix calculus notation, this is

2218

$$\begin{aligned} \frac{d\bar{\epsilon}_{ia}}{d\tau} = & \left( \frac{\partial h_{ia}}{\partial \mathbf{x}_a^T} \frac{d\mathbf{x}_a}{d\tau} + \frac{\partial h_{ia}}{\partial \mathbf{y}_a^T} \frac{d\mathbf{y}_a}{d\tau} + \sum_{k=1}^{N_a} \frac{\partial h_{ia}}{\partial \bar{\mathbf{x}}_k^T} \frac{d\bar{\mathbf{x}}_k}{d\tau} \right. \\ & \left. + \sum_{k=1}^{N_a} \frac{\partial h_{ia}}{\partial \bar{\mathbf{y}}_k^T} \frac{d\bar{\mathbf{y}}_k}{d\tau} + \frac{\partial h_{ia}}{\partial \tau} \right) \Big|_{\mathbf{y}=\bar{\mathbf{y}}}. \end{aligned}$$

Applying matrix calculus notation again yields

2219

$$\begin{aligned} \frac{d\bar{\epsilon}_{ia}}{d\tau} = & \left( \frac{\partial h_{ia}}{\partial \mathbf{x}_a^T} \frac{d\mathbf{x}_a}{d\tau} + \frac{\partial h_{ia}}{\partial \mathbf{y}_a^T} \frac{d\mathbf{y}_a}{d\tau} + \frac{\partial h_{ia}}{\partial \bar{\mathbf{x}}^T} \frac{d\bar{\mathbf{x}}}{d\tau} + \frac{\partial h_{ia}}{\partial \bar{\mathbf{y}}^T} \frac{d\bar{\mathbf{y}}}{d\tau} \right. \\ & \left. + \frac{\partial h_{ia}}{\partial \tau} \right) \Big|_{\mathbf{y}=\bar{\mathbf{y}}}. \end{aligned}$$

Rewriting  $h_{ia}$  as  $\epsilon_{ia}$ , we obtain

2220

$$\begin{aligned} \frac{d\bar{\epsilon}_{ia}}{d\tau} = & \left( \frac{\partial \epsilon_{ia}}{\partial \mathbf{x}_a^T} \frac{d\mathbf{x}_a}{d\tau} + \frac{\partial \epsilon_{ia}}{\partial \mathbf{y}_a^T} \frac{d\mathbf{y}_a}{d\tau} + \frac{\partial \epsilon_{ia}}{\partial \bar{\mathbf{x}}^T} \frac{d\bar{\mathbf{x}}}{d\tau} + \frac{\partial \epsilon_{ia}}{\partial \bar{\mathbf{y}}^T} \frac{d\bar{\mathbf{y}}}{d\tau} \right. \\ & \left. + \frac{\partial \epsilon_{ia}}{\partial \tau} \right) \Big|_{\mathbf{y}=\bar{\mathbf{y}}}. \end{aligned}$$

2221 Hence, for all environmental traits at age  $a$ , we have

$$\frac{d\bar{\epsilon}_a}{d\tau} = \left( \frac{\partial \epsilon_a}{\partial \mathbf{x}_a^\top} \frac{d\mathbf{x}_a}{d\tau} + \frac{\partial \epsilon_a}{\partial \mathbf{y}_a^\top} \frac{d\mathbf{y}_a}{d\tau} + \frac{\partial \epsilon_a}{\partial \bar{\mathbf{x}}^\top} \frac{d\bar{\mathbf{x}}}{d\tau} + \frac{\partial \epsilon_a}{\partial \bar{\mathbf{y}}^\top} \frac{d\bar{\mathbf{y}}}{d\tau} + \frac{\partial \epsilon_a}{\partial \tau} \right) \Bigg|_{\mathbf{y}=\bar{\mathbf{y}}}.$$

2222 Note that evaluation of  $d\mathbf{z}_a/d\tau$  and  $\partial \epsilon_a/\partial \tau$  at  $\mathbf{y} = \bar{\mathbf{y}}$  is  $d\bar{\mathbf{z}}_a/d\tau$  and  $\partial \bar{\epsilon}_a/\partial \tau$ , respectively. Using Layer 2, Eq. 2d and

2223 Layer 2, Eq. 2d yields

$$\begin{aligned} \frac{\partial \epsilon_a}{\partial \mathbf{x}_a^\top} \frac{d\bar{\mathbf{x}}}{d\tau} &= \sum_{j=1}^{N_a} \frac{\partial \epsilon_a}{\partial \mathbf{x}_j^\top} \frac{d\bar{\mathbf{x}}_j}{d\tau} = \frac{\partial \epsilon_a}{\partial \mathbf{x}_a^\top} \frac{d\bar{\mathbf{x}}_a}{d\tau} \\ \frac{\partial \epsilon_a}{\partial \mathbf{y}_a^\top} \frac{d\bar{\mathbf{y}}}{d\tau} &= \sum_{j=1}^{N_a} \frac{\partial \epsilon_a}{\partial \mathbf{y}_j^\top} \frac{d\bar{\mathbf{y}}_j}{d\tau} = \frac{\partial \epsilon_a}{\partial \mathbf{y}_a^\top} \frac{d\bar{\mathbf{y}}_a}{d\tau}. \end{aligned}$$

2224 Then, we have

$$\frac{d\bar{\epsilon}_a}{d\tau} = \left( \frac{\partial \epsilon_a}{\partial \mathbf{x}^\top} \frac{d\bar{\mathbf{x}}}{d\tau} + \frac{\partial \epsilon_a}{\partial \mathbf{y}^\top} \frac{d\bar{\mathbf{y}}}{d\tau} + \frac{\partial \epsilon_a}{\partial \bar{\mathbf{x}}^\top} \frac{d\bar{\mathbf{x}}}{d\tau} + \frac{\partial \epsilon_a}{\partial \bar{\mathbf{y}}^\top} \frac{d\bar{\mathbf{y}}}{d\tau} + \frac{\partial \bar{\epsilon}_a}{\partial \tau} \right) \Bigg|_{\mathbf{y}=\bar{\mathbf{y}}}.$$

2225 Now note that  $\partial \epsilon_a/\partial \mathbf{z}^\top = (\partial \epsilon_a/\partial \mathbf{x}^\top, \partial \epsilon_a/\partial \mathbf{y}^\top)$ , so

$$\frac{d\bar{\epsilon}_a}{d\tau} = \left( \frac{\partial \epsilon_a}{\partial \mathbf{z}^\top} \frac{d\bar{\mathbf{z}}}{d\tau} + \frac{\partial \epsilon_a}{\partial \bar{\mathbf{z}}^\top} \frac{d\bar{\mathbf{z}}}{d\tau} + \frac{\partial \bar{\epsilon}_a}{\partial \tau} \right) \Bigg|_{\mathbf{y}=\bar{\mathbf{y}}}.$$

2226 Hence, for all environmental traits over all ages, we have

$$\begin{aligned} \frac{d\bar{\epsilon}}{d\tau} &= \left( \frac{\partial \epsilon}{\partial \mathbf{z}^\top} \frac{d\bar{\mathbf{z}}}{d\tau} + \frac{\partial \epsilon}{\partial \bar{\mathbf{z}}^\top} \frac{d\bar{\mathbf{z}}}{d\tau} + \frac{\partial \bar{\epsilon}}{\partial \tau} \right) \Bigg|_{\mathbf{y}=\bar{\mathbf{y}}} \\ &= \left[ \left( \frac{\partial \epsilon}{\partial \mathbf{z}^\top} + \frac{\partial \epsilon}{\partial \bar{\mathbf{z}}^\top} \right) \frac{d\bar{\mathbf{z}}}{d\tau} + \frac{\partial \bar{\epsilon}}{\partial \tau} \right] \Bigg|_{\mathbf{y}=\bar{\mathbf{y}}}, \end{aligned}$$

2227 where we use Layer 2, Eq. 7 and the block matrix of direct effects of social partners' geno-phenotype on a mutant's  
2228 environment (Layer 2, Eq. 8; see also Layer 2, Eq. 5).

2229 Let us momentarily write  $\epsilon = \tilde{\mathbf{h}}(\mathbf{z}, \bar{\mathbf{z}})$  for some differentiable function  $\tilde{\mathbf{h}}$  to highlight the dependence of a mu-  
2230 tant's environment  $\epsilon$  on her geno-phenotype  $\mathbf{z}$  and on the geno-phenotype  $\bar{\mathbf{z}}$  of resident social partners. Consider the  
2231 environment a resident experiences when she is in the context of mutants, denoted by  $\check{\epsilon} = \tilde{\mathbf{h}}(\bar{\mathbf{z}}, \mathbf{z})$ . Hence,

$$\frac{\partial \check{\epsilon}}{\partial \mathbf{z}^\top} \Bigg|_{\mathbf{y}=\bar{\mathbf{y}}} = \frac{\partial \tilde{\mathbf{h}}(\bar{\mathbf{z}}, \mathbf{z})}{\partial \mathbf{z}^\top} \Bigg|_{\mathbf{y}=\bar{\mathbf{y}}} = \frac{\partial \tilde{\mathbf{h}}(\bar{\mathbf{z}}, \bar{\mathbf{z}})}{\partial \bar{\mathbf{z}}^\top} \Bigg|_{\mathbf{y}=\bar{\mathbf{y}}} = \frac{\partial \epsilon}{\partial \bar{\mathbf{z}}^\top} \Bigg|_{\mathbf{y}=\bar{\mathbf{y}}}, \quad (11)$$

2232 where the second equality follows by exchanging dummy variables. Then, the transpose of the matrix of *direct social*  
2233 *effects of a mutant's geno-phenotype on her and a partner's environment* is

$$\begin{aligned} \frac{\partial(\epsilon + \check{\epsilon})}{\partial \mathbf{z}^\top} \Bigg|_{\mathbf{y}=\bar{\mathbf{y}}} &= \left( \frac{\partial \epsilon}{\partial \mathbf{z}^\top} + \frac{\partial \check{\epsilon}}{\partial \mathbf{z}^\top} \right) \Bigg|_{\mathbf{y}=\bar{\mathbf{y}}} = \left( \frac{\partial \epsilon}{\partial \mathbf{z}^\top} + \frac{\partial \epsilon}{\partial \bar{\mathbf{z}}^\top} \right) \Bigg|_{\mathbf{y}=\bar{\mathbf{y}}} \\ &\in \mathbb{R}^{N_a N_e \times N_a (N_p + N_g)}. \end{aligned} \quad (12)$$

2234 Similarly, the transpose of the matrix of *direct social effects of a mutant's phenotype on her and a partner's environ-*  
2235 *ment* is

$$\frac{\partial(\epsilon + \check{\epsilon})}{\partial \mathbf{x}^\top} \Bigg|_{\mathbf{y}=\bar{\mathbf{y}}} = \left( \frac{\partial \epsilon}{\partial \mathbf{x}^\top} + \frac{\partial \check{\epsilon}}{\partial \mathbf{x}^\top} \right) \Bigg|_{\mathbf{y}=\bar{\mathbf{y}}} = \left( \frac{\partial \epsilon}{\partial \mathbf{x}^\top} + \frac{\partial \epsilon}{\partial \bar{\mathbf{x}}^\top} \right) \Bigg|_{\mathbf{y}=\bar{\mathbf{y}}}$$

$$\in \mathbb{R}^{N_a N_c \times N_a N_p}, \quad (I3)$$

and the transpose of the matrix of *direct social effects of a mutant's genotype on her and a partner's environment* is 2236

$$\begin{aligned} \left. \frac{\partial(\boldsymbol{\epsilon} + \check{\boldsymbol{\epsilon}})}{\partial \mathbf{y}^\top} \right|_{\mathbf{y}=\bar{\mathbf{y}}} &= \left( \frac{\partial \boldsymbol{\epsilon}}{\partial \mathbf{y}^\top} + \frac{\partial \check{\boldsymbol{\epsilon}}}{\partial \mathbf{y}^\top} \right) \Bigg|_{\mathbf{y}=\bar{\mathbf{y}}} = \left( \frac{\partial \boldsymbol{\epsilon}}{\partial \mathbf{y}^\top} + \frac{\partial \boldsymbol{\epsilon}}{\partial \bar{\mathbf{y}}^\top} \right) \Bigg|_{\mathbf{y}=\bar{\mathbf{y}}} \\ &\in \mathbb{R}^{N_a N_c \times N_a N_g}. \end{aligned} \quad (I4)$$

Consequently, the evolutionary dynamics of the environment are given by Layer 7, Eq. 10. 2237

### Appendix I.2. In terms of total genotypic selection 2238

Using the expression for the evolutionary dynamics of the geno-phenotype (Layer 7, Eq. 5 for  $\zeta = \mathbf{z}$ ) in that for the environment (Layer 7, Eq. 10) yields 2239  
2240

$$\frac{d\bar{\boldsymbol{\epsilon}}}{d\tau} \approx \left[ \frac{\partial(\boldsymbol{\epsilon} + \check{\boldsymbol{\epsilon}})}{\partial \mathbf{z}^\top} \left( \iota \mathbf{L}_{zy} \frac{dw}{dy} + \frac{\mathbf{s}\mathbf{z}}{\mathbf{s}\boldsymbol{\epsilon}^\top} \frac{\partial \boldsymbol{\epsilon}}{\partial \tau} \right) + \frac{\partial \boldsymbol{\epsilon}}{\partial \tau} \right] \Bigg|_{\mathbf{y}=\bar{\mathbf{y}}}.$$

Using Layer 6, Eq. 13 for  $\zeta = \mathbf{z}$  yields 2241

$$\frac{d\bar{\boldsymbol{\epsilon}}}{d\tau} \approx \left[ \frac{\partial(\boldsymbol{\epsilon} + \check{\boldsymbol{\epsilon}})}{\partial \mathbf{z}^\top} \left( \iota \frac{\mathbf{s}\mathbf{z}}{\mathbf{s}\mathbf{y}^\top} \mathbf{H}_y \frac{dw}{dy} + \frac{\mathbf{s}\mathbf{z}}{\mathbf{s}\boldsymbol{\epsilon}^\top} \frac{\partial \boldsymbol{\epsilon}}{\partial \tau} \right) + \frac{\partial \boldsymbol{\epsilon}}{\partial \tau} \right] \Bigg|_{\mathbf{y}=\bar{\mathbf{y}}}.$$

Collecting for  $\partial \boldsymbol{\epsilon} / \partial \tau$  and using Layer 5, Eq. 6 yields 2242

$$\frac{d\bar{\boldsymbol{\epsilon}}}{d\tau} \approx \left( \iota \frac{\mathbf{s}\boldsymbol{\epsilon}}{\mathbf{s}\mathbf{y}^\top} \mathbf{H}_y \frac{dw}{dy} + \frac{\mathbf{s}\boldsymbol{\epsilon}}{\mathbf{s}\boldsymbol{\epsilon}^\top} \frac{\partial \boldsymbol{\epsilon}}{\partial \tau} \right) \Bigg|_{\mathbf{y}=\bar{\mathbf{y}}}.$$

Using Layer 6, Eq. 13 yields Layer 7, Eq. 5 for  $\zeta = \boldsymbol{\epsilon}$ . Using the third line of Layer 4, Eq. 22 and Layer 6, Eq. 11 yields Layer 7, Eq. 4 for  $\zeta = \boldsymbol{\epsilon}$ , whereas using the fourth line of Layer 4, Eq. 22 and Layer 6, Eq. 12 yields Layer 7, Eq. 1a for  $\zeta = \boldsymbol{\epsilon}$ . 2243  
2244  
2245

## Appendix J. Evolutionary dynamics of the geno-envo-phenotype 2246

### Appendix J.1. In terms of total genotypic selection 2247

Here we obtain an equation describing the evolutionary dynamics of the resident geno-envo-phenotype, that is,  $d\bar{\mathbf{m}}/d\tau$ . In this section, we write such an equation in terms of total genotypic selection. Since  $d\bar{\mathbf{m}}/d\tau = (d\bar{\mathbf{x}}/d\tau; d\bar{\mathbf{y}}/d\tau; d\bar{\boldsymbol{\epsilon}}/d\tau)$ , from (G15), (S10a), and Layer 7, Eq. 5 for  $\zeta = \boldsymbol{\epsilon}$ , we can write the evolutionary dynamics of the resident geno-envo-phenotype  $\bar{\mathbf{m}}$  as 2248  
2249  
2250  
2251

$$\frac{d\bar{\mathbf{m}}}{d\tau} \approx \left[ \iota \begin{pmatrix} \mathbf{L}_{xy} \\ \mathbf{H}_y \\ \mathbf{L}_{ey} \end{pmatrix} \frac{dw}{dy} + \begin{pmatrix} \mathbf{s}\mathbf{x} \\ \mathbf{s}\boldsymbol{\epsilon}^\top \\ \mathbf{0} \\ \mathbf{s}\boldsymbol{\epsilon} \\ \mathbf{s}\boldsymbol{\epsilon}^\top \end{pmatrix} \frac{\partial \bar{\boldsymbol{\epsilon}}}{\partial \tau} \right] \Bigg|_{\mathbf{y}=\bar{\mathbf{y}}}. \quad (J1)$$

2252 Using Layer 6, Eq. 10 and Layer 5, Eq. 3, this is

$$\frac{d\hat{\mathbf{m}}}{d\tau} \approx \left[ \begin{array}{c} \left( \frac{\mathbf{S}\mathbf{X}}{\mathbf{S}\mathbf{y}^T} \right) \\ \left( \frac{\mathbf{S}\boldsymbol{\epsilon}}{\mathbf{S}\mathbf{y}^T} \right) \end{array} \right]_{\mathbf{y}=\bar{\mathbf{y}}} \mathbf{H}_y \frac{dw}{dy} + \left[ \begin{array}{c} \left( \frac{\mathbf{S}\mathbf{X}}{\mathbf{S}\boldsymbol{\epsilon}^T} \right) \\ \left( \frac{\mathbf{S}\mathbf{y}}{\mathbf{S}\boldsymbol{\epsilon}^T} \right) \\ \left( \frac{\mathbf{S}\boldsymbol{\epsilon}}{\mathbf{S}\boldsymbol{\epsilon}^T} \right) \end{array} \right] \frac{\partial \bar{\boldsymbol{\epsilon}}}{\partial \tau} .$$

2253 Using Layer 5, Eq. 7, this reduces to

$$\frac{d\hat{\mathbf{m}}}{d\tau} \approx \left( \left[ \frac{\mathbf{S}\mathbf{m}}{\mathbf{S}\mathbf{y}^T} \right]_{\mathbf{y}=\bar{\mathbf{y}}} \mathbf{H}_y \frac{dw}{dy} + \left[ \frac{\mathbf{S}\mathbf{m}}{\mathbf{S}\boldsymbol{\epsilon}^T} \right] \frac{\partial \bar{\boldsymbol{\epsilon}}}{\partial \tau} \right) \Big|_{\mathbf{y}=\bar{\mathbf{y}}} .$$

2254 Using Layer 6, Eq. 13 yields Layer 7, Eq. 5 for  $\zeta = \mathbf{m}$ . Using the third line of Layer 4, Eq. 22 and Layer 6, Eq. 11  
 2255 yields Layer 7, Eq. 4 for  $\zeta = \mathbf{m}$ , whereas using the fourth line of Layer 4, Eq. 22 and Layer 6, Eq. 12 yields Layer 7,  
 2256 Eq. 1a for  $\zeta = \mathbf{m}$ .

2257 In contrast to other arrangements, the premultiplying matrix  $\mathbf{L}_{\mathbf{m}\mathbf{y}}$  is non-singular if  $\mathbf{H}_y$  is non-singular. Indeed, if

$$\left[ \frac{\mathbf{S}\mathbf{m}}{\mathbf{S}\mathbf{y}^T} \right]_{\mathbf{y}=\bar{\mathbf{y}}} \mathbf{r} = \mathbf{0}$$

2258 for some vector  $\mathbf{r}$ , then from Layer 5, Eq. 7a and Layer 5, Eq. 3b we have

$$\left[ \begin{array}{c} \left( \frac{\mathbf{S}\mathbf{X}}{\mathbf{S}\mathbf{y}^T} \right) \\ \mathbf{I} \\ \left( \frac{\mathbf{S}\boldsymbol{\epsilon}}{\mathbf{S}\mathbf{y}^T} \right) \end{array} \right]_{\mathbf{y}=\bar{\mathbf{y}}} \mathbf{r} = \mathbf{0} .$$

2259 Doing the multiplication yields

$$\left( \begin{array}{c} \left( \frac{\mathbf{S}\mathbf{X}}{\mathbf{S}\mathbf{y}^T} \right)_{\mathbf{y}=\bar{\mathbf{y}}} \mathbf{r} \\ \mathbf{r} \\ \left( \frac{\mathbf{S}\boldsymbol{\epsilon}}{\mathbf{S}\mathbf{y}^T} \right)_{\mathbf{y}=\bar{\mathbf{y}}} \mathbf{r} \end{array} \right) = \mathbf{0} ,$$

2260 which implies that  $\mathbf{r} = \mathbf{0}$ , so  $\mathbf{S}\mathbf{m}/\mathbf{S}\mathbf{y}^T|_{\mathbf{y}=\bar{\mathbf{y}}}$  is non-singular. Thus,  $\mathbf{L}_{\mathbf{m}\mathbf{y}}$  is non-singular if  $\mathbf{H}_y$  is non-singular.

2261 *Appendix J.2. In terms of total selection on the geno-envo-phenotype*

2262 Here we write the evolutionary dynamics of the geno-envo-phenotype in terms of the total selection gradient of  
 2263 the geno-envo-phenotype.

2264 First, using Layer 6, Eq. 2, we define the *mechanistic additive genetic covariance matrix of the unperturbed*  
 2265 *geno-envo-phenotype*  $\hat{\mathbf{m}} = (\bar{\mathbf{x}}; \mathbf{y}; \bar{\boldsymbol{\epsilon}})$  as

$$\mathbf{H}_{\hat{\mathbf{m}}} \equiv \text{cov}[\mathbf{b}_{\hat{\mathbf{m}}}, \mathbf{b}_{\hat{\mathbf{m}}}] = \left( \frac{d\hat{\mathbf{m}}}{d\mathbf{y}^T} \mathbf{H}_y \frac{d\hat{\mathbf{m}}}{d\mathbf{y}} \right) \Big|_{\mathbf{y}=\bar{\mathbf{y}}} \\ \in \mathbb{R}^{N_a(N_p+N_g+N_e) \times N_a(N_p+N_g+N_e)} .$$

By definition of  $\hat{\mathbf{m}}$ , we have

2266

$$\mathbf{H}_{\hat{\mathbf{m}}} = \left[ \left[ \begin{array}{c} \frac{d\bar{\mathbf{x}}}{dy^T} \\ \frac{dy}{dy^T} \\ \frac{d\bar{\boldsymbol{\epsilon}}}{dy^T} \end{array} \right] \mathbf{H}_y \left( \begin{array}{ccc} \frac{d\bar{\mathbf{x}}^T}{dy} & \frac{dy^T}{dy} & \frac{d\bar{\boldsymbol{\epsilon}}^T}{dy} \end{array} \right) \right]_{y=\bar{y}}.$$

From Eqs. (S10c) and (S10d), the resident phenotype and environment are independent of the mutant genotype, so

2267

$$\mathbf{H}_{\hat{\mathbf{m}}} = \left[ \left[ \begin{array}{c} \mathbf{0} \\ \mathbf{I} \\ \mathbf{0} \end{array} \right] \mathbf{H}_y \left( \begin{array}{ccc} \mathbf{0} & \mathbf{I} & \mathbf{0} \end{array} \right) \right]_{y=\bar{y}}.$$

Doing the matrix multiplication yields

2268

$$\mathbf{H}_{\hat{\mathbf{m}}} = \left[ \left[ \begin{array}{c} \mathbf{0} \\ \mathbf{I} \\ \mathbf{0} \end{array} \right] \left( \begin{array}{ccc} \mathbf{0} & \mathbf{H}_y & \mathbf{0} \end{array} \right) \right]_{y=\bar{y}} = \left[ \begin{array}{ccc} \mathbf{0} & \mathbf{0} & \mathbf{0} \\ \mathbf{0} & \mathbf{H}_y & \mathbf{0} \\ \mathbf{0} & \mathbf{0} & \mathbf{0} \end{array} \right]. \quad (\text{J2})$$

The matrix  $\mathbf{H}_{\hat{\mathbf{m}}}$  is singular because the unperturbed geno-envo-phenotype includes the genotype (i.e.,  $d\hat{\mathbf{m}}^T/dy|_{y=\bar{y}}$  has fewer rows than columns). For this reason, the matrix  $\mathbf{H}_{\hat{\mathbf{m}}}$  would still be singular even if the zero block entries in Eq. (J2) were non-zero (i.e., if  $d\bar{\mathbf{x}}^T/dy|_{y=\bar{y}} \neq \mathbf{0}$  and  $d\bar{\boldsymbol{\epsilon}}^T/dy|_{y=\bar{y}} \neq \mathbf{0}$ ).

2269

2270

2271

Now, we write an alternative factorization of  $\mathbf{L}_{\mathbf{m}}$  in terms of  $\mathbf{H}_{\hat{\mathbf{m}}}$ . Using Layer 4, Eq. 18 and Layer 5, Eq. 8, we have

2272

2273

$$\left( \begin{array}{c} \frac{\mathbf{sm}}{\mathbf{sm}^T} \mathbf{H}_{\hat{\mathbf{m}}} \frac{d\mathbf{m}^T}{d\mathbf{m}} \end{array} \right)_{y=\bar{y}} = \left[ \left[ \begin{array}{ccc} \frac{\mathbf{sx}}{\mathbf{sx}^T} & \frac{\mathbf{sx}}{\mathbf{sy}^T} & \frac{\mathbf{sx}}{\mathbf{s\boldsymbol{\epsilon}}^T} \\ \mathbf{0} & \mathbf{I} & \mathbf{0} \\ \frac{\mathbf{s\boldsymbol{\epsilon}}}{\mathbf{sx}^T} & \frac{\mathbf{s\boldsymbol{\epsilon}}}{\mathbf{sy}^T} & \frac{\mathbf{s\boldsymbol{\epsilon}}}{\mathbf{s\boldsymbol{\epsilon}}^T} \end{array} \right] \left( \begin{array}{ccc} \mathbf{0} & \mathbf{0} & \mathbf{0} \\ \mathbf{0} & \mathbf{H}_y & \mathbf{0} \\ \mathbf{0} & \mathbf{0} & \mathbf{0} \end{array} \right) \right]_{y=\bar{y}} \\ \left[ \left[ \begin{array}{ccc} \frac{d\mathbf{x}^T}{d\mathbf{x}} & \mathbf{0} & \frac{d\boldsymbol{\epsilon}^T}{d\mathbf{x}} \\ \frac{d\mathbf{x}^T}{d\mathbf{y}} & \mathbf{I} & \frac{d\boldsymbol{\epsilon}^T}{d\mathbf{y}} \\ \frac{d\mathbf{x}^T}{d\boldsymbol{\epsilon}} & \mathbf{0} & \frac{d\boldsymbol{\epsilon}^T}{d\boldsymbol{\epsilon}} \end{array} \right] \right]_{y=\bar{y}}.$$

Doing the matrix multiplication yields

2274

$$\left( \begin{array}{c} \frac{\mathbf{sm}}{\mathbf{sm}^T} \mathbf{H}_{\hat{\mathbf{m}}} \frac{d\mathbf{m}^T}{d\mathbf{m}} \end{array} \right)_{y=\bar{y}} = \left[ \left[ \begin{array}{ccc} \frac{\mathbf{sx}}{\mathbf{sx}^T} & \frac{\mathbf{sx}}{\mathbf{sy}^T} & \frac{\mathbf{sx}}{\mathbf{s\boldsymbol{\epsilon}}^T} \\ \mathbf{0} & \mathbf{I} & \mathbf{0} \\ \frac{\mathbf{s\boldsymbol{\epsilon}}}{\mathbf{sx}^T} & \frac{\mathbf{s\boldsymbol{\epsilon}}}{\mathbf{sy}^T} & \frac{\mathbf{s\boldsymbol{\epsilon}}}{\mathbf{s\boldsymbol{\epsilon}}^T} \end{array} \right] \left( \begin{array}{ccc} \mathbf{0} & \mathbf{0} & \mathbf{0} \\ \mathbf{H}_y \frac{d\mathbf{x}^T}{d\mathbf{y}} & \mathbf{H}_y & \mathbf{H}_y \frac{d\boldsymbol{\epsilon}^T}{d\mathbf{y}} \\ \mathbf{0} & \mathbf{0} & \mathbf{0} \end{array} \right) \right]_{y=\bar{y}}$$

$$= \left( \begin{array}{ccc} \frac{\mathbf{s}\mathbf{x}}{\mathbf{s}\mathbf{y}^\top} \mathbf{H}_y \frac{d\mathbf{x}^\top}{dy} & \frac{\mathbf{s}\mathbf{x}}{\mathbf{s}\mathbf{y}^\top} \mathbf{H}_y & \frac{\mathbf{s}\mathbf{x}}{\mathbf{s}\mathbf{y}^\top} \mathbf{H}_y \frac{d\boldsymbol{\epsilon}^\top}{dy} \\ \mathbf{H}_y \frac{d\mathbf{x}^\top}{dy} & \mathbf{H}_y & \mathbf{H}_y \frac{d\boldsymbol{\epsilon}^\top}{dy} \\ \frac{\mathbf{s}\boldsymbol{\epsilon}}{\mathbf{s}\mathbf{y}^\top} \mathbf{H}_y \frac{d\mathbf{x}^\top}{dy} & \frac{\mathbf{s}\boldsymbol{\epsilon}}{\mathbf{s}\mathbf{y}^\top} \mathbf{H}_y & \frac{\mathbf{s}\boldsymbol{\epsilon}}{\mathbf{s}\mathbf{y}^\top} \mathbf{H}_y \frac{d\boldsymbol{\epsilon}^\top}{dy} \end{array} \right) \Big|_{y=\bar{y}}$$

2275 Using Layer 5, Eq. 3b, this is

$$\left( \frac{\mathbf{s}\mathbf{m}}{\mathbf{s}\mathbf{m}^\top} \mathbf{H}_{\hat{\mathbf{m}}} \frac{d\mathbf{m}^\top}{d\mathbf{m}} \right) \Big|_{y=\bar{y}} = \left( \begin{array}{ccc} \frac{\mathbf{s}\mathbf{x}}{\mathbf{s}\mathbf{y}^\top} \mathbf{H}_y \frac{d\mathbf{x}^\top}{dy} & \frac{\mathbf{s}\mathbf{x}}{\mathbf{s}\mathbf{y}^\top} \mathbf{H}_y \frac{dy^\top}{dy} & \frac{\mathbf{s}\mathbf{x}}{\mathbf{s}\mathbf{y}^\top} \mathbf{H}_y \frac{d\boldsymbol{\epsilon}^\top}{dy} \\ \frac{\mathbf{s}\mathbf{y}}{\mathbf{s}\mathbf{y}^\top} \mathbf{H}_y \frac{d\mathbf{x}^\top}{dy} & \frac{\mathbf{s}\mathbf{y}}{\mathbf{s}\mathbf{y}^\top} \mathbf{H}_y \frac{dy^\top}{dy} & \frac{\mathbf{s}\mathbf{y}}{\mathbf{s}\mathbf{y}^\top} \mathbf{H}_y \frac{d\boldsymbol{\epsilon}^\top}{dy} \\ \frac{\mathbf{s}\boldsymbol{\epsilon}}{\mathbf{s}\mathbf{y}^\top} \mathbf{H}_y \frac{d\mathbf{x}^\top}{dy} & \frac{\mathbf{s}\boldsymbol{\epsilon}}{\mathbf{s}\mathbf{y}^\top} \mathbf{H}_y \frac{dy^\top}{dy} & \frac{\mathbf{s}\boldsymbol{\epsilon}}{\mathbf{s}\mathbf{y}^\top} \mathbf{H}_y \frac{d\boldsymbol{\epsilon}^\top}{dy} \end{array} \right) \Big|_{y=\bar{y}}$$

2276 Notice that the matrix on the right-hand side is

$$\left( \frac{\mathbf{s}\mathbf{m}}{\mathbf{s}\mathbf{y}^\top} \mathbf{H}_y \frac{d\mathbf{m}^\top}{dy} \right) \Big|_{y=\bar{y}} = \mathbf{L}_m.$$

2277 Hence, we obtain an alternative factorization for  $\mathbf{L}_m$  as

$$\mathbf{L}_m = \left( \frac{\mathbf{s}\mathbf{m}}{\mathbf{s}\mathbf{m}^\top} \mathbf{H}_{\hat{\mathbf{m}}} \frac{d\mathbf{m}^\top}{d\mathbf{m}} \right) \Big|_{y=\bar{y}}.$$

2278 We can now write the selection response of the geno-envo-phenotype (in the form of Layer 7, Eq. 1a) as

$$\iota \mathbf{L}_m \frac{\partial w}{\partial \mathbf{m}} \Big|_{y=\bar{y}} = \iota \left( \frac{\mathbf{s}\mathbf{m}}{\mathbf{s}\mathbf{m}^\top} \mathbf{H}_{\hat{\mathbf{m}}} \frac{d\mathbf{m}^\top}{d\mathbf{m}} \frac{\partial w}{\partial \mathbf{m}} \right) \Big|_{y=\bar{y}}.$$

2279 Using the relationship between the total and partial selection gradients of the geno-envo-phenotype (Layer 4, Eq. 25),

2280 this becomes

$$\iota \mathbf{L}_m \frac{\partial w}{\partial \mathbf{m}} \Big|_{y=\bar{y}} = \iota \left( \frac{\mathbf{s}\mathbf{m}}{\mathbf{s}\mathbf{m}^\top} \mathbf{H}_{\hat{\mathbf{m}}} \frac{dw}{d\mathbf{m}} \right) \Big|_{y=\bar{y}}.$$

2281 We can further simplify this equation by noticing the following. Using Layer 6, Eq. 10 and  $\hat{\mathbf{m}} = (\bar{\mathbf{x}}; \mathbf{y}; \bar{\boldsymbol{\epsilon}})$ , we have

2282 that the *mechanistic additive socio-genetic cross-covariance matrix of the geno-envo-phenotype and the unperturbed*

2283 *geno-envo-phenotype* is

$$\mathbf{L}_{m\hat{\mathbf{m}}} = \left( \frac{\mathbf{s}\mathbf{m}}{\mathbf{s}\mathbf{y}^\top} \mathbf{H}_y \frac{d\hat{\mathbf{m}}^\top}{dy} \right) \Big|_{y=\bar{y}} \quad (\text{J3})$$

$$\in \mathbb{R}^{N_a(N_p+N_g+N_c) \times N_a(N_p+N_g+N_c)}.$$

2284 Expanding, we have

$$\mathbf{L}_{m\hat{\mathbf{m}}} = \left( \begin{array}{c} \frac{\mathbf{s}\mathbf{x}}{\mathbf{s}\mathbf{y}^\top} \\ \frac{\mathbf{s}\mathbf{y}}{\mathbf{s}\mathbf{y}^\top} \\ \frac{\mathbf{s}\boldsymbol{\epsilon}}{\mathbf{s}\mathbf{y}^\top} \end{array} \right) \mathbf{H}_y \left( \begin{array}{ccc} d\bar{\mathbf{x}}^\top & dy^\top & d\bar{\boldsymbol{\epsilon}}^\top \\ dy & dy & dy \end{array} \right) \Big|_{y=\bar{y}}.$$

Using Layer 5, Eq. 3b and since the resident phenotype and environment do not depend on the mutant genotype, then 2285

$$\mathbf{L}_{m\hat{m}} = \left[ \begin{array}{c} \left( \frac{\mathbf{S}\mathbf{X}}{\mathbf{S}\mathbf{y}^T} \right) \\ \mathbf{I} \\ \left( \frac{\mathbf{S}\boldsymbol{\epsilon}}{\mathbf{S}\mathbf{y}^T} \right) \end{array} \right] \mathbf{H}_y \left( \mathbf{0} \quad \mathbf{I} \quad \mathbf{0} \right) \Big|_{y=\bar{y}} .$$

Doing the matrix multiplication yields 2286

$$\begin{aligned} \mathbf{L}_{m\hat{m}} &= \left[ \begin{array}{c} \left( \frac{\mathbf{S}\mathbf{X}}{\mathbf{S}\mathbf{y}^T} \right) \\ \mathbf{I} \\ \left( \frac{\mathbf{S}\boldsymbol{\epsilon}}{\mathbf{S}\mathbf{y}^T} \right) \end{array} \right] \left( \mathbf{0} \quad \mathbf{H}_y \quad \mathbf{0} \right) \Big|_{y=\bar{y}} \\ &= \left( \begin{array}{ccc} \mathbf{0} & \frac{\mathbf{S}\mathbf{X}}{\mathbf{S}\mathbf{y}^T} \mathbf{H}_y & \mathbf{0} \\ \mathbf{0} & \mathbf{H}_y & \mathbf{0} \\ \mathbf{0} & \frac{\mathbf{S}\boldsymbol{\epsilon}}{\mathbf{S}\mathbf{y}^T} \mathbf{H}_y & \mathbf{0} \end{array} \right) \Big|_{y=\bar{y}} . \end{aligned}$$

Notice that the last matrix equals 2287

$$\left( \frac{\mathbf{S}\mathbf{m}}{\mathbf{S}\mathbf{m}^T} \mathbf{H}_{\hat{m}} \right) \Big|_{y=\bar{y}} .$$

Thus, 2288

$$\mathbf{L}_{m\hat{m}} = \left( \frac{\mathbf{S}\mathbf{m}}{\mathbf{S}\mathbf{m}^T} \mathbf{H}_{\hat{m}} \right) \Big|_{y=\bar{y}} .$$

We can then write the evolutionary dynamics of the resident geno-envo-phenotype  $\bar{\mathbf{m}}$  in terms of the total selection gradient of the geno-envo-phenotype as 2289

$$\frac{d\bar{\mathbf{m}}}{d\tau} \approx \left( \iota \mathbf{L}_{m\hat{m}} \frac{dw}{d\mathbf{m}} + \frac{\mathbf{S}\mathbf{m}}{\mathbf{S}\boldsymbol{\epsilon}^T} \frac{\partial \bar{\boldsymbol{\epsilon}}}{\partial \tau} \right) \Big|_{y=\bar{y}} . \quad (\text{J4})$$

The cross-covariance matrix  $\mathbf{L}_{m\hat{m}}$  is singular because  $d\hat{\mathbf{m}}^T/d\mathbf{y}|_{y=\bar{y}}$  has fewer rows than columns since the unperturbed geno-envo-phenotype includes the genotype. For this reason,  $\mathbf{L}_{m\hat{m}}$  would still be singular even if the zero block entries in Eq. (J3) were non-zero (i.e., if  $d\bar{\mathbf{x}}^T/d\mathbf{y}|_{y=\bar{y}} \neq \mathbf{0}$  and  $d\bar{\boldsymbol{\epsilon}}^T/d\mathbf{y}|_{y=\bar{y}} \neq \mathbf{0}$ ). Then, evolutionary equilibria of the geno-envo-phenotype do not imply absence of total selection on the geno-envo-phenotype, even if exogenous plastic response is absent. 2291  
2292  
2293  
2294  
2295

## Appendix K. Connection to dynamic optimization 2296

Life-history models often consider genetically controlled traits (controls) that depend on an underlying variable (e.g., age) together with traits (states) constructed via dynamic (e.g., developmental) constraints over the underlying 2297  
2298

2299 variable. When such a model is simple enough, analytical solution (i.e., identification of evolutionarily stable strate-  
 2300 gies) is possible using optimal control or dynamic programming methods (Sydsæter et al., 2008). A key tool from  
 2301 optimal control theory that enables finding such analytical solutions (i.e., optimal controls) is Pontryagin’s maximum  
 2302 principle. The maximum principle is a theorem that essentially transforms the dynamic optimization problem into a  
 2303 simpler problem of maximizing a function called the Hamiltonian, which depends on control, state, and costate (or ad-  
 2304 joint) variables. The problem is then to maximize the Hamiltonian with respect to the controls, while state and costate  
 2305 variables can be found from associated dynamic equations. We now show that our results imply the key elements of  
 2306 Pontryagin’s maximum principle for a standard life-history problem.

2307 First, we state the optimization problem. Let  $\mathbf{y}$  and  $\mathbf{x}$  respectively denote the control and state variables over age,  
 2308 and assume that there are no environmental traits. Let survivorship be a state variable, denoted by  $x_{\ell a} = \ell_a$ , so it  
 2309 satisfies the developmental constraint  $x_{\ell, a+1} = g_{\ell a}(\mathbf{z}_a, \bar{\mathbf{z}}) = x_{\ell a} p_a(\mathbf{z}_a, \bar{\mathbf{z}})$  with initial condition  $x_{\ell 1} = \bar{x}_{\ell 1} = 1$ . Thus,  
 2310 using Eq. 8, we can write the expected lifetime number of offspring of a mutant with pair  $\mathbf{z} = (\mathbf{x}; \mathbf{y})$  in the context of  
 2311 a resident with pair  $\bar{\mathbf{z}} = (\bar{\mathbf{x}}; \bar{\mathbf{y}})$  as

$$R_0(\mathbf{z}, \bar{\mathbf{z}}) = \sum_{a=1}^{N_a} x_{\ell a} f_a(\mathbf{z}_a, \bar{\mathbf{z}}). \quad (\text{K1a})$$

2312 Consider the optimization problem of finding an optimal pair  $\mathbf{z}^* = (\mathbf{x}^*; \mathbf{y}^*)$  such that

$$\mathbf{y}^* \in \arg \max_{\mathbf{y}} R_0(\mathbf{z}, \mathbf{z}^*), \quad (\text{K1b})$$

2313 subject to the dynamic constraint

$$\mathbf{x}_{a+1} = \mathbf{g}_a(\mathbf{z}_a, \bar{\mathbf{z}}), \quad (\text{K1c})$$

2314 for  $a \in \{1, \dots, N_a\}$ , with  $\mathbf{x}_1 = \bar{\mathbf{x}}_1$  given and  $\mathbf{x}_{N_a}$  free. Hence,  $\mathbf{z}^*$  is a best response to itself under the best response  
 2315 function  $R_0$ , where  $\mathbf{y}^*$  is an optimal control and  $\mathbf{x}^*$  is its associated optimal state. The optimization problem in (K1) is a  
 2316 standard life-history problem generalized to include social interactions. From Layer 7, Eq. 5 for  $\zeta = \mathbf{z}$  and Eq. (S22b),  
 2317 it follows that since there is no exogenous environmental change, an admissible locally stable evolutionary equilibrium  
 2318  $\mathbf{z}^*$  locally solves the problem (K1).

2319 Second, we define the costate variables and show that they are proportional to the total selection gradient of states  
 2320 evaluated at an admissible locally stable evolutionary equilibrium. The costate variable of the  $i$ -th state variable at age  
 2321  $a$  for problem (K1) is defined as

$$k_{x_{ia}} \equiv \left. \frac{dR_0}{dx_{ia}} \right|_{\mathbf{z}=\bar{\mathbf{z}}=\mathbf{z}^*} \quad (\text{K2})$$

2322 (section 9.6 of Sydsæter et al. 2008). Hence, from Eq. (S22b), we have that the costate for the  $i$ -th state variable at  
 2323 age  $a$  is

$$k_{x_{ia}} = T \left. \frac{dw}{dx_{ia}} \right|_{\mathbf{z}=\bar{\mathbf{z}}=\mathbf{z}^*}. \quad (\text{K3})$$



That is, costate variables are proportional to the total selection gradient of state variables at an admissible locally stable evolutionary equilibrium  $\mathbf{z}^*$ . The total selection gradient of states thus generalizes the costate notion to the situation where controls and states are outside of evolutionary equilibrium for the life-history problem of  $R_0$  maximization. We have obtained various equations (Layer 4, Eq. 21) that enable direct calculation of such generalized costates in age structured models with  $R_0$  maximization. Moreover, we have obtained an equation that relates such generalized costates to the evolutionary dynamics (fifth line of Layer 4, Eq. 22). Since we are assuming that there are no environmental traits, total immediate effect matrices reduce to direct effect matrices. Thus, the fifth line of Layer 4, Eq. 22 shows that such generalized costates affect the evolutionary dynamics indirectly by being transformed by the direct effects of controls on states,  $\partial \mathbf{x}^\top / \partial \mathbf{y}$ .

Third, we show that total maximization of  $R_0$  is equivalent to direct maximization of the Hamiltonian, which is the central feature of Pontryagin's maximum principle. We have that the total selection gradient of controls can be written in terms of the total selection gradients of states (fifth line of Layer 4, Eq. 22), so for the controls at age  $a$  we have

$$\left. \frac{d\mathbf{w}}{d\mathbf{y}_a} \right|_{\mathbf{y}=\bar{\mathbf{y}}} = \left( \frac{\partial \mathbf{x}^\top}{\partial \mathbf{y}_a} \frac{d\mathbf{w}}{d\mathbf{x}} + \frac{\partial \mathbf{w}}{\partial \mathbf{y}_a} \right) \Big|_{\mathbf{y}=\bar{\mathbf{y}}},$$

where we substituted total immediate derivatives for partial derivatives because we are assuming that there are no environmental traits. Using Eqs. (S22) yields

$$\left. \frac{dR_0}{d\mathbf{y}_a} \right|_{\mathbf{y}=\bar{\mathbf{y}}} = \left( \frac{\partial \mathbf{x}^\top}{\partial \mathbf{y}_a} \frac{dR_0}{d\mathbf{x}} + \frac{\partial R_0}{\partial \mathbf{y}_a} \right) \Big|_{\mathbf{y}=\bar{\mathbf{y}}}.$$

From Eqs. (C10) and (K1a) given that the partial derivative ignores the dynamic constraint (K1c), it follows that

$$\left. \frac{dR_0}{d\mathbf{y}_a} \right|_{\mathbf{y}=\bar{\mathbf{y}}} = \left( \frac{\partial \mathbf{x}_{a+1}^\top}{\partial \mathbf{y}_a} \frac{dR_0}{d\mathbf{x}_{a+1}} + \frac{\partial (x_{\ell a} f_a)}{\partial \mathbf{y}_a} \right) \Big|_{\mathbf{y}=\bar{\mathbf{y}}}.$$

Using Eqs. (K2) and (K1c) and evaluating at optimal controls yields

$$\left. \frac{dR_0}{d\mathbf{y}_a} \right|_{\mathbf{y}=\bar{\mathbf{y}}=\mathbf{y}^*} = \left( \frac{\partial \mathbf{g}_a^\top}{\partial \mathbf{y}_a} \mathbf{k}_{\mathbf{x}_{a+1}} + \frac{\partial (x_{\ell a} f_a)}{\partial \mathbf{y}_a} \right) \Big|_{\mathbf{y}=\bar{\mathbf{y}}=\mathbf{y}^*}. \quad (\text{K4})$$

This suggests to define

$$\mathcal{H}_a \equiv \mathbf{g}_a^\top \mathbf{k}_{\mathbf{x}_{a+1}} + x_{\ell a} f_a, \quad (\text{K5})$$

which recovers the Hamiltonian of Pontryagin's maximum principle in discrete time (section 12.5 of Sydsæter et al. 2008) for the objective function (K1a). Then, the total derivative of the objective function with respect to the controls at a given age equals the partial derivative of the Hamiltonian when both derivatives are evaluated at optimal controls:

$$\left. \frac{dR_0}{d\mathbf{y}_a} \right|_{\mathbf{y}=\bar{\mathbf{y}}=\mathbf{y}^*} = \left. \frac{\partial \mathcal{H}_a}{\partial \mathbf{y}_a} \right|_{\mathbf{y}=\bar{\mathbf{y}}=\mathbf{y}^*}.$$

This is the essence of Pontryagin's maximum principle: the signs of the left-hand side derivatives are the same as the signs of the derivatives on the right-hand side, which are simpler to compute (although one must then compute costate variables).

2348 Fourth, we show that the formulas we found for the costate variables (K2) imply the costate equations of Pontryagin's maximum principle for discrete time. Such costate equations are dynamic equations that allow one to calculate  
 2349 the costate variables. Using Layer 4, Eq. 21 and Eqs. (S22), we have that  
 2350

$$\left. \frac{dR_0}{d\mathbf{x}_a} \right|_{y=\bar{y}} = \left( \frac{d\mathbf{x}^\top}{d\mathbf{x}_a} \frac{\partial R_0}{\partial \mathbf{x}} \right) \Big|_{y=\bar{y}}.$$

2351 Expanding the matrix multiplication on the right-hand side, this is

$$\left. \frac{dR_0}{d\mathbf{x}_a} \right|_{y=\bar{y}} = \left( \sum_{j=1}^{N_a} \frac{d\mathbf{x}_j^\top}{d\mathbf{x}_a} \frac{\partial R_0}{\partial \mathbf{x}_j} \right) \Big|_{y=\bar{y}} = \left( \frac{\partial R_0}{\partial \mathbf{x}_a} + \sum_{j=a+1}^{N_a} \frac{d\mathbf{x}_j^\top}{d\mathbf{x}_a} \frac{\partial R_0}{\partial \mathbf{x}_j} \right) \Big|_{y=\bar{y}},$$

2352 where we used Eq. (B15). Using the expression of the total effect of states on themselves as a product (Layer 4, Eq. 2)  
 2353 yields

$$\left. \frac{dR_0}{d\mathbf{x}_a} \right|_{y=\bar{y}} = \left( \frac{\partial R_0}{\partial \mathbf{x}_a} + \sum_{j=a+1}^{N_a} \frac{\partial \mathbf{x}_{a+1}^\top}{\partial \mathbf{x}_a} \frac{d\mathbf{x}_j^\top}{d\mathbf{x}_{a+1}} \frac{\partial R_0}{\partial \mathbf{x}_j} \right) \Big|_{y=\bar{y}}.$$

2354 Doing the sum over  $j$  yields

$$\begin{aligned} \left. \frac{dR_0}{d\mathbf{x}_a} \right|_{y=\bar{y}} &= \left( \frac{\partial R_0}{\partial \mathbf{x}_a} + \frac{\partial \mathbf{x}_{a+1}^\top}{\partial \mathbf{x}_a} \sum_{j=a+1}^{N_a} \frac{d\mathbf{x}_j^\top}{d\mathbf{x}_{a+1}} \frac{\partial R_0}{\partial \mathbf{x}_j} \right) \Big|_{y=\bar{y}} \\ &= \left( \frac{\partial R_0}{\partial \mathbf{x}_a} + \frac{\partial \mathbf{x}_{a+1}^\top}{\partial \mathbf{x}_a} \frac{d\mathbf{x}^\top}{d\mathbf{x}_{a+1}} \frac{\partial R_0}{\partial \mathbf{x}} \right) \Big|_{y=\bar{y}}. \end{aligned}$$

2355 Using the second line of Layer 4, Eq. 21 and Eqs. (S22) again yields

$$\left. \frac{dR_0}{d\mathbf{x}_a} \right|_{y=\bar{y}} = \left( \frac{\partial R_0}{\partial \mathbf{x}_a} + \frac{\partial \mathbf{x}_{a+1}^\top}{\partial \mathbf{x}_a} \frac{dR_0}{d\mathbf{x}_{a+1}} \right) \Big|_{y=\bar{y}}. \quad (\text{K6})$$

2356 This equals the partial derivative of the Hamiltonian with respect to the states at age  $a$ . Indeed, using (K5) we have

$$\left. \frac{\partial \mathcal{H}_a}{\partial \mathbf{x}_a} \right|_{y=\bar{y}} = \left( \frac{\partial \mathbf{x}_{a+1}^\top}{\partial \mathbf{x}_a} \frac{dR_0}{d\mathbf{x}_{a+1}} + \frac{\partial R_0}{\partial \mathbf{x}_a} \right) \Big|_{y=\bar{y}}.$$

2357 Substituting this in Eq. (K6) and evaluating at optimal controls yields

$$\mathbf{k}_a = \left. \frac{\partial \mathcal{H}_a}{\partial \mathbf{x}_a} \right|_{y=\bar{y}=y^*}.$$

2358 This is the costate equation of Pontryagin's maximum principle in discrete time (Eq. 4 in section 12.5 of Sydsæter  
 2359 et al. 2008).

## 2360 References

- 2361 Alberch, P., Gould, S. J., Oster, G. F., Wake, D. B., 1979. Size and shape in ontogeny and phylogeny. *Paleobiology* 5, 296–317.  
 2362 Alon, U., 2020. *An Introduction to System Biology*, 2nd Edition. Taylor & Francis, Boca Raton, FL, USA.

- Altenberg, L., 1995. Genome growth and the evolution of the genotype-phenotype map. In: Banzhaf, W., Eeckman, F. H. (Eds.), *Evolution and biocomputation*. Vol. 899 of Lecture Notes in Computer Science. Springer-Verlag, pp. 205–259. 2363
- Aoki, K., Wakano, J. Y., Lehmann, L., 2012. Evolutionarily stable learning schedules and cumulative culture in discrete generation models. *Theor. Popul. Biol.* 81, 300–309. 2365
- Arnold, S. J., 1992. Constraints on phenotypic evolution. *Am. Nat.* 140, S85–S107. 2367
- Arthur, W., 2004. *Biased Embryos and Evolution*. Cambridge Univ. Press, Cambridge, UK. 2368
- Avila, P., Fromhage, L., Lehmann, L., 2019. Sex-allocation conflict and sexual selection throughout the lifespan of eusocial colonies. *Evolution* 73, 1116–1132. 2369
- Avila, P., Priklopil, T., Lehmann, L., 2021. Hamilton’s rule, gradual evolution, and the optimal (feedback) control of phenotypically plastic traits. *J. Theor. Biol.*, 110602. 2371
- Baldwin, J. M., 1896. A new factor in evolution. *Am. Nat.* 30, 441–451. 2373
- Barfield, M., Holt, R. D., Gomulkiewicz, R., 2011. Evolution in stage-structured populations. *Am. Nat.* 177, 397–409. 2374
- Barresi, M. J. F., Gilbert, S. F., 2020. *Developmental Biology*, 12th Edition. Oxford Univ. Press, Oxford, UK. 2375
- Barton, N. H., 2017. How does epistasis influence the response to selection? *Heredity* 118, 96–109. 2376
- Barton, N. H., Etheridge, A. M., Véber, A., 2017. The infinitesimal model: definition, derivation, and implications. *Theor. Popul. Biol.* 118, 50–73. 2377
- Barton, N. H., Turelli, M., 1987. Adaptive landscapes, genetic distance and the evolution of quantitative characters. *Genet. Res.* 49, 157–173. 2378
- Bienvenu, F., Legendre, S., 2015. A new approach to the generation time in matrix population models. *Am. Nat.* 185, 834–843. 2379
- Björklund, M., Husby, A., Gustafsson, L., 2013. Rapid and unpredictable changes of the G-matrix in a natural bird population over 25 years. *J. Evol. Biol.* 26, 1–13. 2380
- Bonduriansky, R., Day, T., 2018. *Extended Heredity: a new understanding of inheritance and evolution*. Princeton Univ. Press, Princeton, NJ, USA. 2382
- Boyd, R., Richerson, P. J., 1985. *Culture and the Evolutionary Process*. The Univ. of Chicago Press, Chicago, IL, USA. 2383
- Brakefield, P. M., 2006. Evo-devo and constraints on selection. *Trends Ecol. Evol.* 21, 362–368. 2384
- Brunton, S. L., Proctor, J. L., Kutz, J. N., 2016. Discovering governing equations from data by sparse identification of nonlinear dynamical systems. *Proc. Natl. Acad. Sci. USA* 113, 3932–3937. 2385
- Bulmer, M., 1994. *Theoretical Evolutionary Ecology*. Sinauer, Sunderland, MA, USA. 2387
- Bulmer, M. G., 1971. The effect of selection on genetic variability. *Am. Nat.* 105, 201–211. 2388
- Bulmer, M. G., 1980. *The Mathematical Theory of Quantitative Genetics*. Oxford Univ. Press, Oxford, UK. 2389
- Carter, A. J. R., Hermisson, J., Hansen, T. F., 2005. The role of epistatic interactions in the response to selection and the evolution of evolvability. *Theor. Popul. Biol.* 68, 179–196. 2390
- Caswell, H., 1978. A general formula for the sensitivity of population growth rate to changes in life history parameters. *Theor. Popul. Biol.* 14, 215–230. 2392
- Caswell, H., 1982. Optimal life histories and the age-specific costs of reproduction. *J. Theor. Biol.* 98, 519–529. 2394
- Caswell, H., 2001. *Matrix Population Models*, 2nd Edition. Sinauer, Sunderland, MA, USA. 2395
- Caswell, H., 2019. *Sensitivity Analysis: Matrix Methods in Demography and Ecology*. Springer Open, Cham, Switzerland. 2396
- Caswell, H., Nisbet, R. M., de Roos, A., Tuljapurkar, S., 1997. Structured-population models: many methods, a few basic concepts. In: Tuljapurkar, S., Caswell, H. (Eds.), *Structured-population models in marine, terrestrial, and freshwater systems*. Chapman & Hall, New York, NY, USA. 2398
- Caswell, H., Shyu, E., 2017. Senescence, selection gradients and mortality. *Cambridge Univ. Press, Cambridge, UK*, Ch. 4, pp. 56–82. 2399
- Cavalli-Sforza, L. L., Feldman, M. W., 1981. *Cultural Transmission and Evolution*. Princeton Univ. Press, Princeton, NJ, USA. 2400
- Champagnat, N., 2006. A microscopic interpretation for adaptive dynamics trait substitution sequence models. *Stoch. Process. Their Appl.* 116, 1127–1160. 2401
- Chan, D. C., Laufer, E., Tabin, C., Leder, P., 1995. Polydactylous limbs in Strong’s Luxoid mice result from ectopic polarizing activity. *Development* 121, 1971–1978. 2403
- Charlesworth, B., 1990. Optimization models, quantitative genetics, and mutation. *Evolution* 44, 520–538. 2405

- 2406 Charlesworth, B., 1993. Natural selection on multivariate traits in age-structured populations. *Proc. R. Soc. Lond. B* 251, 47–52.
- 2407 Charlesworth, B., 1994. *Evolution in age-structured populations*, 2nd Edition. Cambridge Univ. Press.
- 2408 Charlesworth, B., Lande, R., Slatkin, M., 1982. A neo-Darwinian commentary on macroevolution. *Evolution* 36, 474–498.
- 2409 Cheverud, J. M., 1984. Quantitative genetics and developmental constraints on evolution by selection. *J. Theor. Biol.* 110, 155–171.
- 2410 Chevin, L.-M., Lande, R., Mace, G. M., 04 2010. Adaptation, plasticity, and extinction in a changing environment: Towards a predictive theory. *PLOS Biology* 8 (4), 1–8.
- 2411
- 2412 Crow, J. F., Kimura, M., 1970. *An Introduction to Population Genetics Theory*. Blackburn Press, Caldwell, NJ, USA.
- 2413 Day, T., Bonduriansky, R., 2011. A unified approach to the evolutionary consequences of genetic and nongenetic inheritance. *Am. Nat.* 178,
- 2414 E18–E36.
- 2415 Day, T., Taylor, P. D., 1997. Hamilton’s rule meets the Hamiltonian: kin selection on dynamic characters. *Proc. R. Soc. Lond. B* 264, 639–644.
- 2416 Day, T., Taylor, P. D., 2000. A generalization of Pontryagin’s maximum principle for dynamic evolutionary games among relatives. *Theor. Popul.*
- 2417 *Biol.* 57, 339–356.
- 2418 de Roos, A., 1997. A gentle introduction to physiologically structured population models. In: Tuljapurkar, S. (Ed.), *Structured-population models*
- 2419 *in marine, terrestrial, and freshwater systems*. Chapman & Hall, New York, NY, USA, pp. 119–271.
- 2420 de Vries, C., Caswell, H., 2018. Demography when history matters: construction and analysis of second-order matrix population models. *Theor.*
- 2421 *Ecol.* 11, 129–140.
- 2422 Débarre, F., Nuismer, S. L., Doebeli, M., 2014. Multidimensional (co)evolutionary stability. *Am. Nat.* 184, 158–171.
- 2423 Dieckmann, U., Heino, M., Parvinen, K., 2006. The adaptive dynamics of function-valued traits. *J. Theor. Biol.* 241, 370–389.
- 2424 Dieckmann, U., Law, R., May 1996. The dynamical theory of coevolution: a derivation from stochastic ecological processes. *J. Math. Biol.* 34 (5),
- 2425 579–612.
- 2426 Durinx, M., (Hans) Metz, J. A. J., Meszéna, G., 2008. Adaptive dynamics for physiologically structured population models. *J. Math. Biol.* 56,
- 2427 673–742.
- 2428 Edwards, A. W. F., 2000. Sewall wright’s equation  $\delta q = (q(1 - q)\partial w/\partial q)/2w$ . *Theor. Popul. Biol.* 57, 67–70.
- 2429 Engen, S., Sæther, B.-E., 2021. Structure of the G-matrix in relation to phenotypic contributions to fitness. *Theor. Popul. Biol.* 138, 43–56.
- 2430 Falconer, D. S., Mackay, T. F. C., 1996. *Introduction to Quantitative Genetics*, 4th Edition. Pearson Prentice Hall, Harlow, England.
- 2431 Fisher, R., 1918. XV. The correlation between relatives on the supposition of Mendelian inheritance. *Trans. Roy. Soc. Edinb.* 52, 399–433.
- 2432 Fisher, R. A., 1930. *The Genetical Theory of Natural Selection*. Oxford Univ. Press, Oxford, UK.
- 2433 Gadgil, M., Bossert, W. H., 1970. Life historical consequences of natural selection. *Am. Nat.* 104, 1–24.
- 2434 Galis, F., Metz, J. A. J., van Alphen, J. J. M., 2018. Development and evolutionary constraints in animals. *Annu. Rev. Ecol. Evol. Syst.* 49, 499–522.
- 2435 Gavrillets, S., Hastings, A., 1994. A quantitative-genetic model for selection on developmental noise. *Evolution* 48, 1478–1486.
- 2436 Gerhart, J., Kirschner, M., 2007. The theory of facilitated variation. *Proc. Natl. Acad. Sci. USA* 104 (suppl 1), 8582–8589.
- 2437 Geritz, S. A. H., 2005. Resident-invader dynamics and the coexistence of similar strategies. *J. Math. Biol.* 50, 67–82.
- 2438 Geritz, S. A. H., Gyllenberg, M., Jacobs, F. J. A., Parvinen, K., 2002. Invasion dynamics and attractor inheritance. *J. Math. Biol.* 44, 548–560.
- 2439 Ghadami, A., Epureanu, B. I., 2022. Data-driven prediction in dynamical systems: recent developments. *Phil. Trans. R. Soc. A* 380, 20210213.
- 2440 Gillespie, J. H., 1983. Some properties of finite populations experiencing strong selection and weak mutation. *Am. Nat.* 121, 691–708.
- 2441 Gimelfarb, A., 1982. Quantitative character dynamics: Gametic model. *Theor. Popul. Biol.* 22, 324–366.
- 2442 Goldschmidt, R., 1940. *The Material Basis of Evolution*. Yale Univ. Press, New Haven, CT, USA.
- 2443 Gomulkiewicz, R., Kirkpatrick, M., 1992. Quantitative genetics and the evolution of reaction norms. *Evolution* 46, 390–411.
- 2444 González-Forero, M., Faulwasser, T., Lehmann, L., 2017. A model for brain life history evolution. *PLOS Comp. Biol.* 13, e1005380.
- 2445 Gould, S. J., 1977. The return of hopeful monsters. *Nat. Hist.* 86, 30.
- 2446 Gould, S. J., Lewontin, R. C., 1979. The spandrels of San Marco and the Panglossian paradigm: a critique of the adaptationist programme. *Proc.*
- 2447 *R. Soc. Lond. B* 205, 581–598.
- 2448 Greene, V. L., 1977. An algorithm for total and indirect causal effects. *Political Methodology* 4, 369–381.

- Hamilton, W. D., 1966. The moulding of senescence by natural selection. *J. Theor. Biol.* 12, 12–45. 2449
- Hansen, T. F., 2013. Why epistasis is important for selection and adaptation. *Evolution* 67, 3501–3511. 2450
- Hansen, T. F., Houle, D., 2004. Evolvability, stabilizing selection, and the problem of stasis. In: Pigliucci, M., Preston, K. (Eds.), *Phenotypic integration: studying ecology and evolution of complex phenotypes*. Oxford Univ. Press, Ch. 5. 2451
- Hansen, T. F., Houle, D., 2008. Measuring and comparing evolvability and constraint in multivariate characters. *J. Evol. Biol.* 21, 1201–1219. 2453
- Hansen, T. F., Wagner, G. P., 2001. Modeling genetic architecture: a multilinear theory of gene interaction. *Theor. Popul. Biol.* 59, 61–86. 2454
- Hermisson, J., Hansen, T. F., Wagner, G. P., 2003. Epistasis in polygenic traits and the evolution of genetic architecture under stabilizing selection. *Am. Nat.* 161, 708–734. 2455
- Hill, W. G., 2017. “Conversion” of epistatic into additive genetic variance in finite populations and possible impact on long-term selection response. *J. Anim. Breed. Genet.* 134, 196–201. 2457
- Hine, E., Blows, M. W., 2006. Determining the effective dimensionality of the genetic variance-covariance matrix. *Genetics* 173, 1135–1144. 2459
- Hine, E., McGuigan, K., Blows, M. W., 2014. Evolutionary constraints in high-dimensional traits sets. *Am. Nat.* 184, 119–131. 2460
- Horn, R. A., Johnson, C. R., 2013. *Matrix Analysis*, 2nd Edition. Cambridge Univ. Press, New York, NY, USA. 2461
- Houle, D., 1991. Genetic covariance of fitness correlates: what genetic correlations are made of and why it matters. *Evolution* 45, 630–648. 2462
- Houston, A., Clark, C., McNamara, J., Mangel, M., 1988. Dynamic models in behavioural and evolutionary ecology. *Nature* 332, 29–34. 2463
- Houston, A. I., McNamara, J. M., 1999. *Models of Adaptive Behaviour: an approach based on state*. Cambridge Univ. Press. 2464
- Iwasa, Y., Roughgarden, J., 1984. Shoot/root balance of plants: optimal growth of a system with many vegetative organs. *Theor. Popul. Biol.* 25, 78–105. 2465
- Jablonka, E., Lachmann, M., Lamb, M. J., 1992. Evidence, mechanisms and models for the inheritance of acquired characters. *J. Theor. Biol.* 158, 245–268. 2467
- Jablonka, E., Lamb, M. J., 2010. Transgenerational epigenetic inheritance. In: Pigliucci, M., Müller, G. B. (Eds.), *Evolution—the extended synthesis*. MIT press, London, UK, pp. 137–174. 2469
- Jablonka, E., Lamb, M. J., 2014. *Evolution in Four Dimensions*, revised Edition. The MIT Press, London, England. 2471
- Johnson, S. G., 2011. Adjoint methods and sensitivity analysis for recurrence relations, <https://math.mit.edu/~stevenj/18.336/recurrence2.pdf>. 2472
- Jones, A. G., Bürger, R., Arnold, S. J., 2014. Epistasis and natural selection shape the mutational architecture of complex traits. *Nat. Comm.* 5, 3709. 2474
- Kaznatcheev, A., 2019. Computational complexity as an ultimate constraint on evolution. *Genetics* 212, 245–265. 2475
- Kingsolver, J. G., Diamond, S. E., 2011. Phenotypic selection in natural populations: What limits directional selection? *Am. Nat.* 177, 346–357. 2476
- Kingsolver, J. G., Hoekstra, H. E., Hoekstra, J. M., Berrigan, D., Vignieri, S. N., Hill, C. E., Hoang, A., Gibert, P., Beerli, P., 2001. The strength of phenotypic selection in natural populations. *Am. Nat.* 157, 245–261. 2478
- Kirkpatrick, M., Heckman, N., Aug 1989. A quantitative genetic model for growth, shape, reaction norms, and other infinite-dimensional characters. *J. Math. Biol.* 27 (4), 429–450. 2479
- Kirkpatrick, M., Lande, R., 1989. The evolution of maternal characters. *Evolution* 43, 485–503. 2481
- Kirkpatrick, M., Lofsvold, D., 1992. Measuring selection and constraint in the evolution of growth. *Evolution* 46, 954–971. 2482
- Kirkpatrick, M., Lofsvold, D., Bulmer, M., 1990. Analysis of inheritance, selection and evolution of growth trajectories. *Genetics* 124, 979–993. 2483
- Kirschner, M. W., Gerhart, J. C., 2010. Facilitated variation. In: Pigliucci, M., Müller, G. B. (Eds.), *Evolution—the extended synthesis*. MIT press, London, UK, pp. 253–280. 2485
- Klingenberg, C. P., 2010. Evolution and development of shape: integrating quantitative approaches. *Nat. Rev. Genet.* 11, 623–635. 2486
- Kobayashi, Y., Wakano, J. Y., Ohtsuki, H., 2015. A paradox of cumulative culture. *J. Theor. Biol.* 379, 79–88. 2487
- Kozłowski, J., Teriokhin, A. T., 1999. Allocation of energy between growth and reproduction: the Pontryagin Maximum Principle solution for the case of age- and season-dependent mortality. *Evol. Ecol. Res.* 1, 423–441. 2489
- Laland, K., Uller, T., Feldman, M., Sterelny, K., Müller, G. B., Moczek, A., Jablonka, E., Odling-Smee, J., 2014. Does evolutionary theory need a rethink? Yes, urgently. *Nature* 514, 161–164. 2490

- 2492 Laland, K. N., Uller, T., Feldman, M. W., Sterelny, K., Miller, G. B., Moczek, A., Jablonka, E., Odling-Smee, J., 2015. The extended evolutionary  
2493 synthesis: its structure, assumptions and predictions. *Proc. R. Soc. B* 282, 20151019.
- 2494 Lande, R., 1979. Quantitative genetic analysis of multivariate evolution applied to brain: body size allometry. *Evolution* 34, 402–416.
- 2495 Lande, R., 1980. The genetic covariance between characters maintained by pleiotropic mutations. *Genetics* 94, 203–215.
- 2496 Lande, R., 1982. A quantitative genetic theory of life history evolution. *Ecology* 63, 607–615.
- 2497 Lande, R., Arnold, S. J., 1983. The measurement of selection on correlated characters. *Evolution* 37, 1210–1226.
- 2498 León, J. A., 1976. Life histories as adaptive strategies. *J. Theor. Biol.* 60, 301–335.
- 2499 Lewontin, R. C., 1983. Gene, organism and environment. In: Bendall, D. S. (Ed.), *Evolution from molecules to men*. Cambridge Univ. Press,  
2500 Cambridge, UK, Ch. 14, pp. 273–285.
- 2501 Litingtung, Y., Dahn, R. D., Li, Y., Fallon, J. F., Chiang, C., 2002. *Shh* and *Gli3* are dispensable for limb skeleton formation but regulate digit  
2502 number and identity. *Nature* 418, 979–983.
- 2503 Lush, J. L., 1937. *Animal Breeding Plans*. Iowa State Univ. Press, Ames, IA, USA.
- 2504 Lynch, M., Walsh, B., 1998. *Genetics and Analysis of Quantitative Traits*. Sinauer, Sunderland, MA, USA.
- 2505 Martin, G., 2014. Fisher’s geometrical model emerges as a property of complex integrated phenotypic networks. *Genetics* 197, 237–255.
- 2506 Maynard Smith, J., Burian, R., Kauffman, S., Alberch, P., Campbell, J., Goodwin, B., Lande, R., Raup, D., Wolpert, L., 1985. Developmental  
2507 constraints and evolution. *Q. Rev. Biol.*
- 2508 McGlothlin, J. W., Moore, A. J., Wolf, J. B., Brodie III, E. D., 2010. Interacting phenotypes and the evolutionary process. III. Social evolution.  
2509 *Evolution* 64, 2558–2574.
- 2510 McGuigan, K., Blows, M., 2007. The phenotypic and genetic covariance structure of *Drosophilid* wings. *Evolution* 61, 902–911.
- 2511 Medawar, P. B., 1952. *An unsolved problem of biology*. H. K. Lewis, London, UK.
- 2512 Merilä, J., Sheldon, B., Kruuk, L., Nov 2001. Explaining stasis: microevolutionary studies in natural populations. *Genetica* 112 (1), 199–222.
- 2513 Metz, J., Geritz, S., Meszéna, G., Jacobs, F., van Heerwaarden, J., 1996. Adaptive dynamics, a geometrical study of the consequences of nearly  
2514 faithful reproduction. In: van Strien, S., Lunel, S. V. (Eds.), *Stochastic and spatial structures of dynamical systems*. Konink. Nederl. Akad.  
2515 Wetensch. Verh. Afd. Natuurk. Eerste Reeks, Amsterdam, Netherlands, pp. 183–231.
- 2516 Metz, J. A. J., 2011. Thoughts on the geometry of meso-evolution: collecting mathematical elements for a postmodern synthesis. In: Chalub, F. A.  
2517 C. C., Rodrigues, J. F. (Eds.), *The Mathematics of Darwin’s Legacy*. Springer, pp. 193–231.
- 2518 Metz, J. A. J., Staňková, K., Johansson, J., Mar 2016. The canonical equation of adaptive dynamics for life histories: from fitness-returns to  
2519 selection gradients and Pontryagin’s maximum principle. *J. Math. Biol.* 72 (4), 1125–1152.
- 2520 Mezey, J. G., Houle, D., 2005. The dimensionality of genetic variation for wing shape in *Drosophila melanogaster*. *Evolution* 59, 1027–1038.
- 2521 Moore, A. J., Brodie III, E. D., Wolf, J. B., 1997. Interacting phenotypes and the evolutionary process: I. direct and indirect genetic effects of social  
2522 interactions. *Evolution* 51 (5), 1352–1362.
- 2523 Morrissey, M. B., 2014. Selection and evolution of causally covarying traits. *Evolution* 68, 1748–1761.
- 2524 Morrissey, M. B., 2015. Evolutionary quantitative genetics of nonlinear developmental systems. *Evolution* 69, 2050–2066.
- 2525 Müller, G. B., 2007. Evo-devo: extending the evolutionary synthesis. *Nat. Rev. Genet.* 8, 943–949.
- 2526 Müller, G. B., 2010. Epigenetic innovation. In: Pigliucci, M., Müller, G. B. (Eds.), *Evolution—the extended synthesis*. MIT press, London, UK,  
2527 pp. 307–332.
- 2528 Murray, J. D., 2003. *Mathematical Biology II: Spatial Models and Biomedical Applications*, 3rd Edition. Springer, Berlin, Germany.
- 2529 Mylius, S. D., Diekmann, O., 1995. On evolutionarily stable life histories, optimization and the need to be specific about density dependence. *Oikos*  
2530 74, 218–224.
- 2531 Nelson, R. M., Pettersson, M. E., Carlborg, Ö., 2013. A century after Fisher: time for a new paradigm in quantitative genetics. *Trends Genet.* 29,  
2532 669–676.
- 2533 Noble, D. W. A., Radersma, R., Uller, T., 2019. Plastic responses to novel environments are biased towards phenotype dimensions with high  
2534 additive genetic variation. *Proc. Natl. Acad. Sci. USA* 116, 13452–13461.

- Odling-Smee, F. J., Laland, K. N., Feldman, M. W., 1996. Niche construction. *Am. Nat.* 147, 641–648. 2535
- Odling-Smee, F. J., Laland, K. N., Feldman, M. W., 2003. *Niche Construction: the neglected process in evolution*. Princeton Univ. Press, Princeton, NJ, USA. 2536
- Odling-Smee, J., 2010. Niche inheritance. In: Pigliucci, M., Müller, G. B. (Eds.), *Evolution—the extended synthesis*. MIT press, pp. 175–207. 2538
- Orr, H. A., 2005. The genetic theory of adaptation: a brief history. *Nat. Rev. Genet.* 6, 119–127. 2539
- Orr, H. A., Coyne, J. A., 1992. The genetics of adaptation: a reassessment. *Am. Nat.* 140, 725–742. 2540
- Otto, S. P., Day, T., 2007. *A Biologist’s Guide to Mathematical Models in Ecology and Evolution*. Princeton Univ. Press, Woodstock, UK. 2541
- Paenke, I., Sendhoff, B., Kawecki, T. J., 2007. Influence of plasticity and learning on evolution under directional selection. *Am. Nat.* 170, E47–E58. 2542
- Paixão, T., Barton, N. H., 2016. The effect of gene interactions on the long-term response to selection. *Proc. Natl. Acad. Sci. USA* 113, 4422–4427. 2543
- Parvinen, K., Heino, M., Dieckmann, U., 2013. Function-valued adaptive dynamics and optimal control theory. *J. Math. Biol.* 67, 509–533. 2544
- Pavlicev, M., Cheverud, J. M., Wagner, G. P., 2011. Evolution of adaptive phenotypic variation patterns by direct selection for evolvability. *Proc. R. Soc. B* 278, 1903–1912. 2545
- Pavlicev, M., Hansen, T. F., 2011. Genotype-phenotype maps maximizing evolvability: modularity revisited. *Evol. Biol.* 38, 371–389. 2547
- Pavlicev, M., Wagner, G. P., 2012. A model of developmental evolution: selection, pleiotropy and compensation. *Trends Ecol. Evol.* 27, 316–322. 2548
- Pigliucci, M., 2001. *Phenotypic Plasticity*. The Johns Hopkins Univ. Press, London, UK. 2549
- Pigliucci, M., 2007. Do we need an extended evolutionary synthesis. *Evolution* 61, 2743–2749. 2550
- Priklopil, T., Lehmann, L., 2020. Invasion implies substitution in ecological communities with class-structured populations. *Theor. Popul. Biol.* 134, 36–52. 2551
- Pujol, B., Blanchet, S., Charmantier, A., Danchin, E., Facon, B., Marrot, P., Roux, F., Scotti, I., Teplitsky, C., Thomson, C. E., et al., 2018. The missing response to selection in the wild. *Trends Ecol. Evol.* 33, 337–346. 2554
- Reuter, M., Keller, L., 2001. Sex ratio conflict and worker production in eusocial hymenoptera. *Am. Nat.* 158, 166–177. 2555
- Rice, S. H., 1990. A geometric model for the evolution of development. *J. Theor. Biol.* 143, 319–342. 2556
- Rice, S. H., 2002. A general population genetic theory for the evolution of developmental interactions. *Proc. Natl. Acad. Sci. USA* 99 (24), 15518–15523. 2557
- Rice, S. H., 2011. The place of development in mathematical evolutionary theory. *J. Exp. Zool.* 314B, 1–9. 2559
- Roff, D. A., 1992. *The Evolution of Life Histories*. Chapman & Hall, New York, NY, USA. 2560
- Salazar-Ciudad, I., 2021. Why call it developmental bias when it is just development? *Biol. Direct* 16, 3. 2561
- Salazar-Ciudad, I., Jernvall, J., 2010. A computational model of teeth and the developmental origins of morphological variation. *Nature* 464, 583–586. 2562
- Salazar-Ciudad, I., Marín-Riera, M., 2013. Adaptive dynamics under development-based genotype-phenotype maps. *Nature* 497, 361–364. 2564
- Saxe, A. M., McClelland, J. L., Ganguli, S., 2019. A mathematical theory of semantic development in deep neural networks. *Proc. Natl. Acad. Sci. USA* 116, 11537–11546. 2565
- Schaffer, W. M., 1983. The application of optimal control theory to the general life history problem. *Am. Nat.* 121, 418–431. 2567
- Schmidt, M., Lipson, H., 2009. Distilling free-form natural laws from experimental data. *Science* 324, 81–85. 2568
- Service, P. M., Rose, M. R., 1985. Genetic covariation among life-history components: the effect of novel environments. *Evolution* 39, 943–945. 2569
- Slatkin, M., 2009. Epigenetic inheritance and the missing heritability problem. *Genetics* 182, 845–850. 2570
- Stearns, S. C., 1992. *The Evolution of Life Histories*. Oxford University Press, Oxford, UK. 2571
- Sutton, R. S., Barto, A. G., 2018. *Reinforcement Learning: An Introduction*, 2nd Edition. The MIT Press, Cambridge, Massachusetts, USA. 2572
- Sydsæter, K., Hammond, P., Seierstad, A., Strom, A., 2008. *Further Mathematics for Economic Analysis*, 2nd Edition. Prentice Hall. 2573
- Taylor, H. M., Gourley, R. S., Lawrence, C. E., Kaplan, R. S., 1974. Natural selection of life history attributes: an analytical approach. *Theor. Popul. Biol.* 5, 104–122. 2574
- Tomlin, C. J., Axelrod, J. D., 2007. Biology by numbers: mathematical modelling in developmental biology. *Nat. Rev. Genet.* 8, 331–340. 2576
- Townley, S., Ezard, T. H. G., 2013. A G matrix analogue to capture the cumulative effects of nongenetic inheritance. *J. Evol. Biol.* 26, 1234–1243. 2577

- 2578 Turelli, M., 1988. Phenotypic evolution, constant covariances, and the maintenance of additive variance. *Evolution* 42, 1342–1347.
- 2579 Turelli, M., Barton, N. H., 1994. Genetic and statistical analyses of strong selection on polygenic traits: what, me normal? *Genetics* 138, 913–941.
- 2580 Turing, A. M., 1952. The chemical basis of morphogenesis. *Phil. Trans. R. Soc. Lond. B* 237, 37–72.
- 2581 Uller, T., Moczek, A. P., Watson, R. A., Brakefield, P. M., Laland, K. N., 2018. Developmental bias and evolution: A regulatory network perspective. *Genetics* 209 (4), 949–966.
- 2582
- 2583 van Tienderen, P. H., 1995. Life cycle trade-offs in matrix population models. *Ecology* 76, 2482–2489.
- 2584 Via, S., Lande, R., 1985. Genotype-environment interaction and the evolution of phenotypic plasticity. *Evolution* 39, 505–522.
- 2585 Voss, R. F., 1992. Evolution of long-range fractal correlations and  $1/f$  noise in DNA base sequences. *Phys. Rev. Lett.* 68, 3805–3808.
- 2586 Waddington, C. H., 1942. Canalization of development and the inheritance of acquired characters. *Nature* 150, 563–565.
- 2587 Waddington, C. H., 1957. *The Strategy of the Genes*. Allen & Unwin, London, UK.
- 2588 Waddington, C. H., 1959. Evolutionary adaptation. *Perspect. Biol. Med.* 2, 379–401.
- 2589 Waddington, C. H., 1961. Genetic assimilation. *Adv. Genet.* 10, 257–293.
- 2590 Wagner, G. P., 1984. On the eigenvalue distribution of genetic and phenotypic dispersion matrices: Evidence for a nonrandom organization of  
2591 quantitative character variation. *J. Math. Biol.* 21, 77–95.
- 2592 Wagner, G. P., 1988. The influence of variation and of developmental constraints on the rate of multivariate phenotypic evolution. *J. Evol. Biol.* 1,  
2593 45–66.
- 2594 Wagner, G. P., 1989. Multivariate mutation-selection balance with constrained pleiotropic effects. *Genetics* 122, 223–234.
- 2595 Wagner, G. P., 1996. Homologues, natural kinds and the evolution of modularity. *Am. Zool.* 36, 36–43.
- 2596 Wagner, G. P., Mezey, J., 2000. Modeling the evolution of genetic architecture: a continuum of alleles models with pairwise  $A \times A$  epistasis. *J.*  
2597 *Theor. Biol.* 203, 163–175.
- 2598 Wagner, G. P., Zhang, J., 2011. The pleiotropic structure of the genotype-phenotype map: the evolvability of complex organisms. *Nat. Rev. Genet.*  
2599 12, 204–213.
- 2600 Walsh, B., Lynch, M., 2018. *Evolution and Selection of Quantitative Traits*. Oxford Univ. Press, Oxford, UK.
- 2601 Watson, R. A., Wagner, G. P., Pavlicev, M., Weinreich, D. M., Mills, R., 2013. The evolution of phenotypic correlations and “developmental  
2602 memory”. *Evolution* 68, 1124–1138.
- 2603 Welch, J. J., 2017. What’s wrong with evolutionary biology? *Biol. Philos.* 32, 263–279.
- 2604 West-Eberhard, M. J., 2003. *Developmental Plasticity and Evolution*. Oxford Univ. Press, Oxford, UK.
- 2605 Wild, G., Traulsen, A., 2007. The different limits of weak selection and the evolutionary dynamics of finite populations. *J. Theor. Biol.* 247,  
2606 382–390.
- 2607 Wolf, J. B., Frankino, W. A., Agrawal, A. F., Brodie III, E. D., Moore, A. J., 2001. Developmental interactions and the constituents of quantitative  
2608 variation. *Evolution* 55, 232–245.
- 2609 Wright, S., 1937. The distribution of gene frequencies in populations. *Proc. Natl. Acad. Sci. USA* 23, 307–320.
