# A mathematical framework for evo-devo dynamics

Mauricio González-Forero<sup>\*1</sup> and Andy Gardner<sup>\*</sup>

<sup>\*</sup>School of Biology, University of St Andrews, Dyers Brae, St Andrews KY16 9TH, UK

**ABSTRACT** Natural selection acts on phenotypes constructed over development, which raises the question of how development affects evolution. Existing mathematical theory has considered either evolutionary dynamics while neglecting developmental dynamics, or developmental dynamics while neglecting evolutionary dynamics by assuming evolutionary equilibrium. We formulate a mathematical framework that integrates explicit developmental dynamics into evolutionary dynamics. We consider two types of traits: genetic traits called control variables and developed traits called state variables. Developed traits are constructed over ontogeny according to a developmental map of ontogenetically prior traits and the social and non-social environment. We obtain general equations describing the evolutionary-developmental (evo-devo) dynamics. These equations can be arranged in a layered structure called the evo-devo process, where five elementary components generate all equations including those describing genetic covariation and the evo-devo dynamics. These equations recover Lande's equation as a special case and describe the evolution of Lande's G-matrix from the evolution of the phenotype, environment, and mutational covariation. This shows that genetic variation is necessarily absent in some directions of phenotype space if at least one trait develops and enough traits are included in the analysis so as to guarantee dynamic sufficiency. Consequently, directional selection alone is generally insufficient to identify evolutionary equilibria. Instead, "total genetic selection" is sufficient to identify evolutionary equilibria if mutational variation exists in all directions of control space and exogenous plastic response vanishes. Developmental and environmental constraints influence the evolutionary equilibria and determine the admissible evolutionary trajectory. These results show that development has major evolutionary effects.

**KEYWORDS** Adaptation; Constraints; G-matrix; Development; Life history; Trade-offs; Optimal control; Matrix population models; Adaptive dynamics; Quantitative genetics

Natural selection screens phenotypes produced over development, defined as the construction of the phenotype across the lifespan. Thus, a fundamental evolutionary question is how development affects evolution. Interest in this question is longstanding (Baldwin 1896, Waddington 1959 p. 399, and Gould and Lewontin 1979) and has steadily increased in recent decades.

A fundamental tool to understand how development affects evolution is Lande's (1979) equation. This equation states that evolutionary change in the multivariate mean phenotype  $\bar{z}$  is  $\Delta\bar{z} = G\beta$ , where the selection gradient  $\beta$  points in the direction of steepest fitness ascent in phenotype space and the additive genetic covariance matrix  $G$  describes the genetic covariation between the traits in phenotype space (Lande 1979; Walsh and Lynch 2018). From Lande's equation, it follows that genetic covariation may divert evolutionary change from the direction of

steepest fitness ascent, and may prevent evolutionary change in some directions if genetic variation in those directions is absent (i.e., if  $G$  is singular). Thus, Lande's equation indicates that development affects evolution by inducing genetic covariation and hence via  $G$  (Charlesworth *et al.* 1982; Cheverud 1984; Maynard Smith *et al.* 1985).

Extensive efforts have been devoted to understand the structure of the G-matrix. Most efforts have been empirical, but progress has been hampered by methodological difficulties (Blows and Hoffmann 2005; Mezey and Houle 2005; Hine and Blows 2006; Blows 2007; Meyer and Kirkpatrick 2008; Kirkpatrick 2009; Pavlicev *et al.* 2009; Walsh and Blows 2009). For instance: a strict estimation of the G-matrix requires large sample sizes and that an arbitrarily large number of traits is analysed, which is impractical (Hill and Thompson 1978; Pavlicev *et al.* 2009); determining whether any eigenvalue of  $G$  is exactly zero, thus indicating that there is no genetic variation in some direction of phenotype space, is infeasible since one cannot sta-

doi: 10.1534/genetics.XXX.XXXXXX

Manuscript compiled: Monday 17<sup>th</sup> May, 2021

<sup>1</sup>Corresponding author. E-mail: mgf3@st-andrews.ac.uk.

tistically establish that a quantity is exactly zero (Kirkpatrick and Lofsvold 1992; Kirkpatrick 2009); and the structure of the  $\mathbf{G}$ -matrix may change by many factors including time, so assessing its structure in a given generation offers little guarantee of its structure in the future (Kirkpatrick 2009; Björklund *et al.* 2013). Simulation and analytical work on the nature of the  $\mathbf{G}$ -matrix has considered the effects of pleiotropy, selection, and drift (Jones *et al.* 2003, 2004, 2007, 2012; Chantepie and Chevin 2020; Engen and Sæther 2021). Yet, analytical work has been hindered by the mathematical complexity of the task (Arnold *et al.* 2008).

Interest in the evolutionary effects of development has increased with growing interest in the evolutionary effects of plasticity, niche construction, extra-genetic inheritance, and developmental bias (West-Eberhard 2003; Laland *et al.* 2015). Many studies have modeled the evolution of plasticity and its effects on the evolutionary process (Via and Lande 1985; Lande 2009, 2014; Michel *et al.* 2014; Lande 2019). Many others have modeled the evolutionary effects of niche construction (Laland *et al.* 1996, 1999, 2001; Lehmann 2007, 2008; Rendell *et al.* 2011; Creanza *et al.* 2012; Creanza and Feldman 2014; Kobayashi *et al.* 2019). There are also many models on the evolutionary effects of extra-genetic inheritance (Cavalli-Sforza and Feldman 1981; Boyd and Richerson 1985; Day and Bonduriansky 2011; Mullon *et al.* 2021) and developmental bias (Salazar-Ciudad and Jernvall 2002; Salazar-Ciudad and Marín-Riera 2013; Milocco and Salazar-Ciudad 2020), although these have not always been verbally framed in such terms.

An important difficulty in understanding how development affects evolution is the existing lack of general mathematical frameworks that explicitly consider developmental and evolutionary dynamics. Lande's equation provides the insight of development as affecting genetic covariation, but Lande's equation has not been derived from an explicit account of development, which may hinder insight into the evolutionary effects of development. Lande's original derivation is based on the standard quantitative genetics approach of describing each individual's multivariate phenotype as breeding value plus uncorrelated error (Lande 1979). Breeding value is in turn the best linear prediction of the phenotype from gene content, using least-square regression (Fisher 1918; Crow and Kimura 1970; Falconer and Mackay 1996; Lynch and Walsh 1998; Walsh and Lynch 2018). This linear prediction can be carried out regardless of any mechanism by which the phenotype is constructed over ontogeny. Thus, details regarding evolutionary effects of development remain implicit in that approach. Consequently, while breeding values may depend on development as well as myriad other factors, information of how this dependence occurs is not made available by the linear regression of phenotype on gene content. This may have limited insight into how development affects the  $\mathbf{G}$ -matrix.

There is a wide variety of mathematical frameworks that relate to the problem of understanding how development affects evolution, but there is a lack of synthesis of these frameworks to simultaneously consider developmental and evolutionary dynamics. First, the earliest frameworks of evolutionary dynamics considered non-overlapping generations without any class structure (Fisher 1922; Wright 1942; Lande 1979; Dieckmann and Law 1996) (Fig. 1A). These frameworks have been extended in various research lines that could be seen as incorporating different aspects of development. One line considers age structure, which allows individuals of different ages to coexist and to have age-

specific survival and fertility rates (Lande 1982; Charlesworth 1993, 1994; Durinx *et al.* 2008; de Vries and Caswell 2018, 2019) (Fig. 1B). An important feature of age-structured models is that the forces of selection decline with age due to demography, in particular due to mortality and fewer remaining reproductive events as age advances (Medawar 1952; Hamilton 1966; Caswell 1978; Caswell and Shyu 2017). Such age-specific decline in the force of selection does not occur in unstructured models.

Second, age- or stage-structured models have been extended to traits that depend on a continuous variable (e.g., age), under the label of function-valued or infinite-dimensional traits (Kirkpatrick and Heckman 1989; Dieckmann *et al.* 2006; Coulson *et al.* 2010; Parvinen *et al.* 2013; Metz *et al.* 2016; Rees and Ellner 2016). The analogue of the  $\mathbf{G}$ -matrix for infinite-dimensional traits (i.e., the genetic covariance function) is thought to be commonly singular since increasing the number traits in the analysis is likely to increase genetic correlations, as supported by empirical data (Wagner 1988; Kirkpatrick and Lofsvold 1992; Gomulkiewicz and Kirkpatrick 1992). While these models consider age-specific traits (Cheverud *et al.* 1983), these models have not considered explicit developmental constraints (but see Avila *et al.* 2021).

Third, another research line in life-history evolution has extended age-structured models to consider explicit developmental constraints, although this literature calls such constraints dynamic rather than developmental (Gadgil and Bossert 1970; Taylor *et al.* 1974; León 1976; Schaffer 1983; Houston *et al.* 1988; Houston and McNamara 1999; Sydsæter *et al.* 2008) (Fig. 1D). Such models consider two types of age-specific traits: control variables that are under genetic control, and state variables that are constructed over ontogeny according to developmental constraints. This explicit consideration of developmental constraints in an evolutionary context considers that the population is at an evolutionary equilibrium. Thus, this approach identifies evolutionarily stable (or uninvadable) controls and associated states using techniques from dynamic optimization such as optimal control and dynamic programming (Gadgil and Bossert 1970; Taylor *et al.* 1974; León 1976; Schaffer 1983; Houston *et al.* 1988; Houston and McNamara 1999). While the assumption of evolutionary equilibrium has enabled deep and numerous insights, it does not address the evolutionary dynamics which would provide a richer understanding. For instance, evolutionary equilibria might not be achieved in realistic evolutionary timescales, different equilibria might be achieved from different ancestral conditions, or equilibria might not be achieved at all (e.g., due to evolutionary cycles).

Fourth, another research line in quantitative genetics has considered unstructured models where a set of traits are functions of underlying traits such as gene expression or environmental variables (Wagner 1984, 1989; Hansen and Wagner 2001; Rice 2002; Martin 2014; Morrissey 2014, 2015) (Fig. 1C). This dependence of traits on other traits is used by this research line to describe the developmental map or the genotype-phenotype map, which is akin to the developmental constraints in life-history models. However, as this research line considers no explicit age progression, it considers implicit rather than explicit developmental (i.e., dynamic) constraints. Thus, this line has not considered the effect of age structure nor explicit developmental constraints (Wagner 1984, 1989; Hansen and Wagner 2001; Rice 2002; Martin 2014; Morrissey 2014, 2015). Overall, there has been a lack of integration of age structure, developmental constraints, and evolutionary dynamics into a single mathematical framework, which has yielded a fragmentary understanding of how

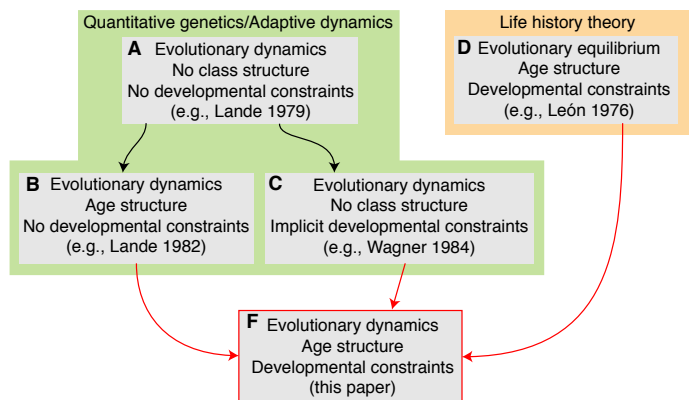

**Figure 1** Previous mathematical frameworks on the question of how development affects evolution. Each box refers to a set of mathematical models considering the indicated assumptions. The arrows point to extensions to previous models.

development—which unfolds as the individual ages—affects evolution.

Here we formulate a mathematical framework that integrates explicit developmental dynamics into evolutionary dynamics. To do this, we model some traits as being constructed over ontogeny, as is done in life-history models with dynamic constraints. We simultaneously consider age structure, developmental constraints, and evolutionary dynamics, and allow for environmentally-mediated phenotype construction, environmental constraints, population dynamics in a fast time scale, and environmental dynamics in a slow time scale. Environmentally-mediated phenotype construction allows for the developed phenotype to depend on (i) the non-social environment (i.e., plasticity) and (ii) the social environment, which can mechanistically describe extra-genetic inheritance and indirect genetic effects (Moore *et al.* 1997). Environmental constraints allow for the environment to depend on individuals’ phenotypes, thus allowing for niche construction (though we do not consider ecological inheritance). Additionally, developmental constraints allow the phenotype to be “predisposed” to develop in certain ways, thus allowing for developmental bias. Our methods integrate tools from adaptive dynamics (Dieckmann and Law 1996), matrix population models (Caswell 2001; Otto and Day 2007), and optimal control (Sydsæter *et al.* 2008).

## Materials and Methods

### Overview

Here we provide an overview of our methods. First, we describe the framework’s set-up, including its components and causal relationships as well as the three phases in which we divide an evolutionary time step. Second, we introduce notation to describe the phenotype, environment, and development. This gives an explicit description of the developmental dynamics. Third, we formally describe the three phases of an evolutionary time step. Fourth, we identify invasion fitness and use it to derive an equation describing the evolutionary dynamics of genetic traits (i.e., controls) under adaptive dynamics assumptions (Dieckmann and Law 1996). This equation depends on what we call the total selection gradient of controls. Thus, we obtain a description of explicit developmental and evolutionary dynamics. Fifth, we identify the selection gradient in age struc-

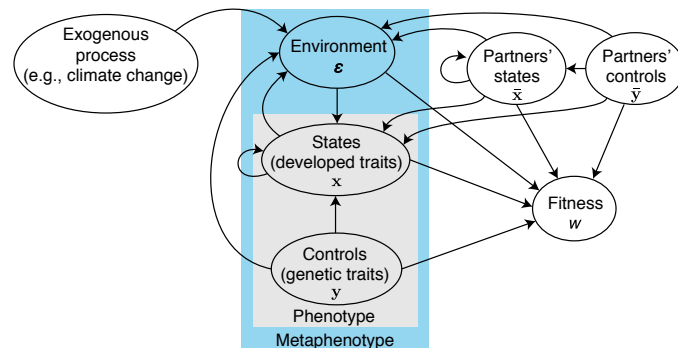

**Figure 2** Causal diagram among the framework’s components. Each arrow indicates the effect of a given variable on another one. States correspond to developed traits (e.g., body size) while controls correspond to genetic traits (e.g., gene expression). The phenotype consists of states and controls. The metaphenotype consists of states, controls, and environment. For simplicity, we assume that controls are open-loop, so there is no arrow towards controls.

tured populations, which we use to calculate the total selection gradient of controls. Based on this setting, in Appendices 4-12, we derive equations describing the evolutionary dynamics of the various types of traits involved in our framework.

### Set up

We base our framework on standard assumptions of adaptive dynamics (Dieckmann and Law 1996). We consider a large, age-structured, well mixed population of clonally reproducing individuals. The population is finite but, in a departure from Dieckmann and Law (1996), we let the population dynamics be deterministic rather than stochastic for simplicity (so there is no genetic drift). Thus, the only source of stochasticity in our framework is mutation. Each individual has a phenotype consisting of two types of traits: age-specific controls and age-specific states (Fig. 2; notation is summarised in Table 1). The values of controls at each age are genetically controlled by genetic loci, although the genetic details such as the number of loci need not be specified given our adaptive dynamics assumptions. States are constructed over development. We separate time scales, so developmental and population dynamics occur in a fast discrete ecological timescale  $t$  and evolutionary dynamics occur in a slow discrete evolutionary timescale  $\tau$ . In addition to this standard separation of time scales used in adaptive dynamics, we add a phase to each evolutionary time step due to social development. Thus, for tractability, we partition a unit of evolutionary time in three phases: socio-developmental (socio-devo) stabilization dynamics, resident population dynamics, and resident-mutant population dynamics (Fig. 3).

At the start of the socio-devo stabilization phase of a given evolutionary time  $\tau$ , the population consists of individuals all having the same resident genotype and phenotype. A new individual arises which has identical genotype and experiences the same environment as the resident, but develops a phenotype that may be different from that of the original resident due to social interactions. This developed phenotype is set as the new resident. This process is repeated until convergence to a socio-devo stable (SDS) resident or until divergence. If development is not social, the resident is trivially SDS so the socio-devo stabilization dynamics phase is unnecessary. If an SDS resident

**Table 1 Notation summary**

| Symbol                                     | Meaning                                                   |
|--------------------------------------------|-----------------------------------------------------------|
| $\mathbf{x}$                               | States (developed traits)                                 |
| $\mathbf{y}$                               | Controls (genetic traits)                                 |
| $\mathbf{z}$                               | Phenotype (states and controls)                           |
| $\boldsymbol{\epsilon}$                    | Environment                                               |
| $\mathbf{m}$                               | Metaphenotype (phenotype and environment)                 |
| $N_a$                                      | Number of ages                                            |
| $N_s$                                      | Number of states                                          |
| $N_c$                                      | Number of controls                                        |
| $N_e$                                      | Number of environmental variables                         |
| $\mathbf{g}$                               | Developmental map                                         |
| $\mathbf{h}$                               | Environmental map                                         |
| $\mathbf{n}$                               | Population density                                        |
| $f$                                        | Fertility                                                 |
| $p$                                        | Survival probability                                      |
| $\ell$                                     | Survivorship                                              |
| $w$                                        | Fitness                                                   |
| $\lambda$                                  | Invasion fitness                                          |
| $\mathbf{u}$                               | Stable age distribution                                   |
| $\mathbf{v}$                               | Reproductive value                                        |
| $\phi$                                     | Force of selection on fertility                           |
| $\pi$                                      | Force of selection on survival                            |
| $t$                                        | Ecological time                                           |
| $\tau$                                     | Evolutionary time                                         |
| $\theta$                                   | Socio-devo stabilization time                             |
| $T$                                        | Generation time                                           |
| $\check{\mathbf{x}}$                       | Resident states in the context of mutant                  |
| $\hat{\mathbf{z}}$                         | Undeveloped phenotype                                     |
| $\mathbf{a}_\zeta$                         | Breeding value of $\zeta$                                 |
| $\mathbf{b}_\zeta$                         | Stabilized breeding value of $\zeta$                      |
| $\mathbf{G}_\zeta$                         | Additive genetic covariance matrix of $\zeta$             |
| $\mathbf{H}_\zeta$                         | Additive socio-genetic cross-covariance matrix of $\zeta$ |
| $\frac{s\zeta^\top}{s\zeta}$               | Stabilized effects of $\zeta$ on $\zeta$                  |
| $\frac{d\zeta^\top}{d\zeta}$               | Total effects of $\zeta$ on $\zeta$                       |
| $\frac{\delta\zeta^\top}{\delta\zeta}$     | Semi-total effects of $\zeta$ on $\zeta$                  |
| $\frac{\partial\zeta^\top}{\partial\zeta}$ | Direct effects of $\zeta$ on $\zeta$                      |

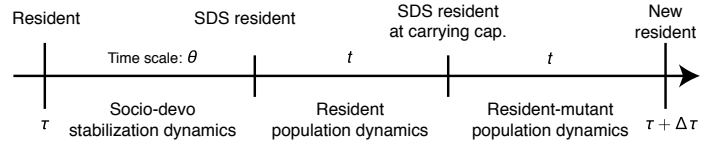

**Figure 3** Phases of the evolutionary cycle. Evolutionary time is  $\tau$ . SDS means socio-devo stable. The socio-devo stabilization dynamics phase is added to the standard separation of timescales in adaptive dynamics, which only consider the other two phases. The socio-devo stabilization dynamics phase is only needed if development is social (i.e., if the developmental map  $\mathbf{g}$  depends on social partners' phenotype).

is achieved, the population moves to the next phase; if an SDS resident is not achieved, the analysis stops. We thus study the evolutionary dynamics of SDS phenotypes.

If an SDS resident is achieved, the population moves to the resident population dynamics phase. In this phase, the SDS resident undergoes density dependent population dynamics which we assume asymptotically converges to a carrying capacity.

Once an SDS resident has achieved carrying capacity, the population moves to the resident-mutant population dynamics phase. At the start of this phase, a random mutant control vector arises in a vanishingly small number of mutants. We assume that control mutation is unbiased and weak. Unbiased control mutation means that mutant controls are symmetrically distributed around the resident controls. Weak control mutation means that the variance of mutant controls around resident controls is marginally small. Weak mutation (Walsh and Lynch 2018, p. 1003) is also called  $\delta$ -weak selection (Wild and Traulsen 2007). We assume that the mutant becomes either lost or fixed in the population (Priklopil and Lehmann 2020), establishing a new resident phenotype.

Repeating this evolutionary cycle generates long term evolutionary dynamics of an SDS phenotype.

### Phenotype, environment, and development

We now introduce notation for the phenotype and environment, and describe the developmental dynamics. Each individual can live from age 1 to age  $N_a \in \mathbb{N}_+ = \{1, 2, 3, \dots\}$ . The phenotype is composed of  $N_s \in \mathbb{N}_+$  state variables and  $N_c \in \mathbb{N}_+$  control variables that have age specific values. Throughout, we denote resident variables with an "overbar" ( $\bar{\cdot}$ ). Let  $\bar{y}_{ia}$  be the  $i$ -th control variable of a resident individual of age  $a$  for  $i \in \{1, \dots, N_c\}$  and  $a \in \{1, \dots, N_a\}$  (e.g., a certain gene's expression level at a given age). Let  $\bar{x}_{ia}$  be the  $i$ -th state variable of a resident individual of age  $a$  for  $i \in \{1, \dots, N_s\}$  and  $a \in \{1, \dots, N_a\}$  (e.g., a certain tissue's size at a given age). The controls of a resident of age  $a$  are given by  $\bar{\mathbf{y}}_a = (\bar{y}_{1a}, \dots, \bar{y}_{N_c a})^\top$ . The states of a resident of age  $a$  are given by  $\bar{\mathbf{x}}_a = (\bar{x}_{1a}, \dots, \bar{x}_{N_s a})^\top$ . The phenotype of a resident of age  $a$  is the vector  $\bar{\mathbf{z}}_a = (\bar{\mathbf{x}}_a; \bar{\mathbf{y}}_a)$ , where the semi-colon indicates a "linebreak" so that the vector  $\bar{\mathbf{x}}_a$  is placed on top of the vector  $\bar{\mathbf{y}}_a$ , that is,  $\bar{\mathbf{z}}_a = (\bar{x}_{1a}, \dots, \bar{x}_{N_s a}, \bar{y}_{1a}, \dots, \bar{y}_{N_c a})^\top$ . The controls of a resident across life are given by the vector  $\bar{\mathbf{y}} = (\bar{\mathbf{y}}_1; \dots; \bar{\mathbf{y}}_{N_a})$ . The states of a resident across life are given by the vector  $\bar{\mathbf{x}} = (\bar{\mathbf{x}}_1; \dots; \bar{\mathbf{x}}_{N_a})$ . The resident phenotype across life is the vector  $\bar{\mathbf{z}} = (\bar{\mathbf{x}}; \bar{\mathbf{y}})$ . The notation for the mutant phenotype is analogous without the overbar (e.g.,  $\mathbf{z}$ ). We analogously denote the phenotype of a focal individual, either resident or mutant, with a bullet  $\bullet$  subscript (e.g.,  $\mathbf{z}_\bullet$ ).

We now describe an individual's environment. We assume

284 that an individual's environment can be described by  $N_e \in \mathbb{N}_+$   
 285 mutually independent environmental variables. Let  $\epsilon_{i\bullet}$  be the  
 286  $i$ -th environmental variable describing the focal individual's  
 287 environment at age  $a$  for  $i \in \{1, \dots, N_e\}$  and  $a \in \{1, \dots, N_a\}$   
 288 (e.g., ambient temperature experienced by the focal individual  
 289 at that age). The vector of environmental variables experienced  
 290 by a focal individual at age  $a$  is  $\epsilon_{a\bullet} = (\epsilon_{1a\bullet}, \dots, \epsilon_{N_e a\bullet})^\top$ . That  
 291 the environmental variables are mutually independent means  
 292 that changing one environmental variable at one age does not  
 293 directly change any other environmental variable at any age (i.e.,  
 294  $\partial \epsilon_{kj\bullet} / \partial \epsilon_{i\bullet} = 0$  if  $i \neq k$  or  $a \neq j$ ). We assume that environmental  
 295 variables are mutually independent to be able to write each  
 296 environmental variable as a function of variables that are not  
 297 directly environment variables, which facilitates derivations.  
 298 The environment experienced across life by the focal individual  
 299 is  $\epsilon_\bullet = (\epsilon_{1\bullet}; \dots; \epsilon_{N_e \bullet})$ . The notation for the environment of a  
 300 resident is analogous without the bullet but with an overbar  
 301 (e.g.,  $\bar{\epsilon}$ ), and for a mutant without the bullet or the overbar (e.g.,  
 302  $\epsilon$ ).

303 A focal individual's environment at age  $a$  satisfies the *envi-*  
 304 *ronmental constraint* given by

$$\epsilon_{a\bullet} = \mathbf{h}_a(\mathbf{z}_{a\bullet}, \bar{\mathbf{z}}, \tau), \quad (1)$$

305 for all  $a \in \{1, \dots, N_a\}$ . The function

$$\mathbf{h}_a(\mathbf{z}_{a\bullet}, \bar{\mathbf{z}}, \tau) = (h_{1a}(\mathbf{z}_{a\bullet}, \bar{\mathbf{z}}, \tau), \dots, h_{N_e a}(\mathbf{z}_{a\bullet}, \bar{\mathbf{z}}, \tau))^\top$$

306 is the *environmental map* at age  $a$  and it is a differentiable function  
 307 of the individual's phenotype at that age (e.g., the individual's  
 308 behaviour at age  $a$  may expose it to a particular environment),  
 309 of the phenotype of social partners of any age (e.g., through  
 310 social niche construction), and of evolutionary time due to slow  
 311 exogenous environmental change (e.g., climate change). The  
 312 environmental map  $\mathbf{h}_a$  can also be a function of the population  
 313 density of the resident ( $\bar{n}(t)$  defined below), but  $\mathbf{h}_a$  is not a func-  
 314 tion of ecological time  $t$  in any other way. Consequently, the  
 315 resident environment  $\bar{\epsilon}$  changes slowly: on the one hand,  $\bar{\epsilon}$  can  
 316 change in ecological time through density dependence, but this  
 317 dependence is evolutionarily immaterial in our analysis because,  
 318 as is standard, we assume mutants arise when residents are at  
 319 carrying capacity in which case the resident population density  
 320 is at equilibrium; on the other hand,  $\bar{\epsilon}$  evolves over evolutionary  
 321 time  $\tau$  as it depends on  $\tau$  indirectly through the resident phe-  
 322 notype and directly due to exogenous environmental change.  
 323 We assume such limited environmental change to enable the  
 324 resident population to reach carrying capacity to be able to use  
 325 relatively simple techniques of evolutionary invasion analysis  
 326 to derive selection gradients.

327 We call  $\mathbf{m}_\bullet = (\mathbf{z}_\bullet; \epsilon_\bullet)$  the *metaphenotype* (i.e., the aggregate  
 328 of phenotype and environment) of a focal individual. Analogously,  
 329 the metaphenotype of a resident is denoted without the  
 330 bullet but with an overbar (e.g.,  $\bar{\mathbf{m}}$ ), and the metaphenotype of a  
 331 mutant is denoted without the bullet or the overbar (e.g.,  $\mathbf{m}$ ).

332 We now describe the process of development. A focal indi-  
 333 vidual's state variables at age  $a + 1$  satisfy the *developmental*  
 334 *constraint* given by

$$\mathbf{x}_{a+1,\bullet} = \mathbf{g}_a(\mathbf{z}_{a\bullet}, \bar{\mathbf{z}}, \epsilon_{a\bullet}), \quad (2)$$

335 for all  $a \in \{1, \dots, N_a - 1\}$  with initial condition  $\mathbf{x}_{1\bullet} = \bar{\mathbf{x}}_1$  (pro-  
 336 vided that  $N_a > 1$ ). The function

$$\mathbf{g}_a(\mathbf{z}_{a\bullet}, \bar{\mathbf{z}}, \epsilon_{a\bullet}) = (g_{1a}(\mathbf{z}_{a\bullet}, \bar{\mathbf{z}}, \epsilon_{a\bullet}), \dots, g_{N_e a}(\mathbf{z}_{a\bullet}, \bar{\mathbf{z}}, \epsilon_{a\bullet}))^\top$$

is the *developmental map* (or genotype-phenotype map) at age  $a$   
 and it is a differentiable function of the individual's phenotype at  
 that age, the phenotype of the individual's social partners which  
 can be of any age, and the environment faced at that age (the  
 term developmental function can be traced back to Gimelfarb  
 1982 through Wagner 1984; for the evolutionary implications of  
 similar maps under non-overlapping generations see Mullon  
 and Lehmann 2017, 2018). For simplicity, we assume that the  
 state variables  $\mathbf{x}_{1\bullet} = \bar{\mathbf{x}}_1$  at the initial age are constant, so they  
 are not developmentally constrained and do not evolve. This as-  
 sumption corresponds to the common assumption in life-history  
 models that state variables at the initial age are given (Gadgil  
 and Bossert 1970; Taylor *et al.* 1974; León 1976; Schaffer 1983;  
 Sydsæter *et al.* 2008). A focal individual's developmental map  
 across life is

$$\mathbf{g}(\mathbf{z}_\bullet, \bar{\mathbf{z}}, \epsilon_\bullet) = (\mathbf{g}_1(\mathbf{z}_{1\bullet}, \bar{\mathbf{z}}, \epsilon_{0\bullet}); \dots; \mathbf{g}_{N_a-1}(\mathbf{z}_{N_a-1,\bullet}, \bar{\mathbf{z}}, \epsilon_{N_a-1,\bullet})). \quad (3)$$

Then, the resident states can be written as  $\bar{\mathbf{x}} = (\bar{\mathbf{x}}_1; \mathbf{g}(\bar{\mathbf{z}}, \bar{\mathbf{z}}, \bar{\epsilon}))$ .

### Phases of the evolutionary cycle

We now formally describe the three phases in which we partition  
 an evolutionary time step (Fig. 3). We start with the socio-devo  
 stabilization dynamics phase, which yields the notions of socio-  
 devo equilibrium and socio-devo stability.

Socio-devo stabilization dynamics occur as follows. For a  
 resident phenotype  $\bar{\mathbf{z}} = (\bar{\mathbf{x}}; \bar{\mathbf{y}})$ , new resident states  $\mathbf{x}_\bullet$  are ob-  
 tained from Eq. (2); the resulting  $\mathbf{z}_\bullet$  is set as the new resident;  
 and this is iterated. To write this formally, let  $\theta$  denote time for  
 the socio-devo stabilization dynamics. During the socio-devo  
 stabilization phase, denote resident states at socio-devo time  $\theta$   
 as  $\bar{\mathbf{x}}(\theta)$ . Then, writing  $\bar{\mathbf{z}}$  in terms of its composing states and  
 controls, the resident states at socio-devo time  $\theta + 1$  are given by

$$\bar{\mathbf{x}}_{a+1}(\theta + 1) = \mathbf{g}_a(\bar{\mathbf{x}}_a(\theta + 1), \bar{\mathbf{y}}_a, \bar{\mathbf{x}}(\theta), \bar{\mathbf{y}}, \mathbf{h}_a(\bar{\mathbf{x}}_a(\theta + 1), \bar{\mathbf{y}}_a, \bar{\mathbf{x}}(\theta), \bar{\mathbf{y}}, \tau)), \quad (4)$$

for all  $a \in \{1, \dots, N_a - 1\}$  and with given initial conditions  $\bar{\mathbf{x}}(1)$   
 and  $\bar{\mathbf{x}}_1(\theta + 1) = \bar{\mathbf{x}}_1$ . If  $\lim_{\theta \rightarrow \infty} \bar{\mathbf{x}}(\theta)$  converges, this limit yields a  
 socio-devo stable phenotype as defined below.

We say a phenotype  $\bar{\mathbf{z}} = (\bar{\mathbf{x}}; \bar{\mathbf{y}})$  is a socio-devo equilibrium  
 if and only if  $\bar{\mathbf{x}}$  is produced by development when everyone  
 else in the population has that  $\bar{\mathbf{z}}$  phenotype and everyone in  
 the population experiences the same environment; specifically, a  
 socio-devo equilibrium  $\bar{\mathbf{z}} = (\bar{\mathbf{x}}; \bar{\mathbf{y}})$  satisfies

$$\bar{\mathbf{x}}_{a+1} = \mathbf{g}_a(\bar{\mathbf{z}}_a, \bar{\mathbf{z}}, \mathbf{h}_a(\bar{\mathbf{z}}_a, \bar{\mathbf{z}}, \tau)), \quad (5)$$

for all  $a \in \{1, \dots, N_a - 1\}$  with initial condition  $\bar{\mathbf{x}}_1$ . We assume  
 that there is at least one socio-devo equilibrium for a given  
 developmental map at evolutionary time  $\tau$ .

It will be useful to note that if the resident phenotype is a  
 socio-devo equilibrium, from Eqs. (1), (2), and (5), it follows  
 that evaluation of the mutant controls at resident controls yields  
 resident variables. That is, if  $\bar{\mathbf{z}}$  is a socio-devo equilibrium, then

$$\begin{aligned} \mathbf{x}|_{\mathbf{y}=\bar{\mathbf{y}}} &= \bar{\mathbf{x}} \\ \epsilon|_{\mathbf{y}=\bar{\mathbf{y}}} &= \bar{\epsilon} \\ \mathbf{z}|_{\mathbf{y}=\bar{\mathbf{y}}} &= \bar{\mathbf{z}} \\ \mathbf{m}|_{\mathbf{y}=\bar{\mathbf{y}}} &= \bar{\mathbf{m}}. \end{aligned}$$

Now, we say a phenotype  $\bar{\mathbf{z}} = (\bar{\mathbf{x}}; \bar{\mathbf{y}})$  is socio-devo stable  
 (SDS) if and only if  $\bar{\mathbf{z}}$  is a locally stable socio-devo equilibrium.  
 A socio-devo equilibrium  $\bar{\mathbf{z}} = (\bar{\mathbf{x}}; \bar{\mathbf{y}})$  is locally stable if and only

384 if a marginally small deviation in the initial states  $\bar{\mathbf{x}}(1)$  from  
 385 the socio-devo equilibrium keeping the same controls leads the  
 386 socio-devo stabilization dynamics to the same equilibrium. Thus,  
 387 a socio-devo equilibrium  $\bar{\mathbf{z}}$  is locally stable if all the eigenvalues  
 388 of the matrix

$$\left. \frac{d\mathbf{x}}{d\bar{\mathbf{x}}^\top} \right|_{\mathbf{y}=\bar{\mathbf{y}}}$$

389 have absolute value strictly less than one (Appendices 14 and  
 390 15). The requirement that this matrix has such eigenvalues arises  
 391 naturally in the derivation of the evolutionary dynamics of states  
 392 (Appendix 9). We assume that there is a unique SDS phenotype  
 393 for a given developmental map at evolutionary time  $\tau$ .

394 Once the SDS resident is reached in the socio-devo stabili-  
 395 zation phase, we continue to the resident population dynam-  
 396 ics phase (Fig. 3). Let the resident phenotype  $\bar{\mathbf{z}}$  be SDS. Let  
 397  $\bar{n}_a$  denote the density of SDS resident individuals of age  
 398  $a \in \{1, \dots, N_a\}$  at ecological time  $t$ . The vector of resident  
 399 density at  $t$  is  $\bar{\mathbf{n}}(t) = (\bar{n}_1(t), \dots, \bar{n}_{N_a}(t))^\top$ . The life cycle  
 400 is age-structured (Fig. 4). At age  $a$ , an SDS resident individual  
 401 produces a number  $A_{1a}(\bar{\mathbf{z}}_a, \bar{\mathbf{z}}, \bar{\mathbf{n}}(t))$  of offspring and survives  
 402 to age  $a + 1$  with probability  $A_{a+1,a}(\bar{\mathbf{z}}_a, \bar{\mathbf{z}}, \bar{\mathbf{n}}(t))$  (where we set  
 403  $A_{N_a+1,N_a}(\bar{\mathbf{z}}_a, \bar{\mathbf{z}}, \bar{\mathbf{n}}(t)) = 0$  without loss of generality). The first  
 404 argument of these two functions is the phenotype of the indi-  
 405 vidual at that age, the second argument is the phenotype of the  
 406 individual's social partners which can be of any age, and  
 407 the third argument is density dependence. The SDS resident  
 408 population thus has deterministic dynamics given by

$$\bar{\mathbf{n}}(t+1) = \mathbf{A}(\bar{\mathbf{z}}, \bar{\mathbf{z}}, \bar{\mathbf{n}}(t))\bar{\mathbf{n}}(t), \quad (6)$$

409 where  $\mathbf{A}(\bar{\mathbf{z}}, \bar{\mathbf{z}}, \bar{\mathbf{n}}(t))$  is a density-dependent Leslie matrix whose  
 410 entries  $A_{ij}(\bar{\mathbf{z}}_j, \bar{\mathbf{z}}, \bar{\mathbf{n}}(t))$  give the age-specific survival probabili-  
 411 ties and fertilities of SDS resident individuals; additionally, the  
 412 first argument of  $\mathbf{A}(\bar{\mathbf{z}}, \bar{\mathbf{z}}, \bar{\mathbf{n}}(t))$  is the phenotype vector formed  
 413 by the first argument of  $A_{ij}(\bar{\mathbf{z}}_j, \bar{\mathbf{z}}, \bar{\mathbf{n}}(t))$  for all  $i, j \in \{1, \dots, N_a\}$ .  
 414 We assume that residents in the last age class reproduce (i.e.,  
 415  $A_{1N_a}(\bar{\mathbf{z}}_{N_a}, \bar{\mathbf{z}}, \bar{\mathbf{n}}(t)) > 0$ ) and that residents can survive to the last  
 416 age class with non-zero probability (i.e.,  $A_{a+1,a}(\bar{\mathbf{z}}_a, \bar{\mathbf{z}}, \bar{\mathbf{n}}(t)) > 0$   
 417 for all  $a \in \{1, \dots, N_a - 1\}$ ); this ensures that  $\mathbf{A}(\bar{\mathbf{z}}, \bar{\mathbf{z}}, \bar{\mathbf{n}}^*(\bar{\mathbf{z}}))$  is  
 418 irreducible, with  $\bar{\mathbf{n}}^*(\bar{\mathbf{z}})$  defined below (Sternberg 2010, section  
 419 9.4). We further assume that residents of at least two consecu-  
 420 tive age classes have non-zero fertility (i.e.,  $A_{1a}(\bar{\mathbf{z}}_a, \bar{\mathbf{z}}, \bar{\mathbf{n}}(t)) > 0$   
 421 and  $A_{1,a+1}(\bar{\mathbf{z}}_{a+1}, \bar{\mathbf{z}}, \bar{\mathbf{n}}(t)) > 0$  for some  $a \in \{1, \dots, N_a - 1\}$ );  
 422 this ensures that  $\mathbf{A}(\bar{\mathbf{z}}, \bar{\mathbf{z}}, \bar{\mathbf{n}}^*(\bar{\mathbf{z}}))$  is primitive (Sternberg 2010, sec-  
 423 tion 9.4.1; i.e., raising  $\mathbf{A}(\bar{\mathbf{z}}, \bar{\mathbf{z}}, \bar{\mathbf{n}}^*(\bar{\mathbf{z}}))$  to a sufficiently high power  
 424 yields a matrix whose entries are all positive). We assume that  
 425 density dependence is such that the population dynamics of the  
 426 SDS resident (Eq. 6) have a unique stable non-trivial equilib-  
 427 rium  $\bar{\mathbf{n}}^*(\bar{\mathbf{z}})$  (a vector of non-negative entries some of which are  
 428 positive), which solves

$$\bar{\mathbf{n}}^*(\bar{\mathbf{z}}) = \mathbf{A}(\bar{\mathbf{z}}, \bar{\mathbf{z}}, \bar{\mathbf{n}}^*(\bar{\mathbf{z}}))\bar{\mathbf{n}}^*(\bar{\mathbf{z}}). \quad (7)$$

429 The sum of the entries of  $\bar{\mathbf{n}}^*(\bar{\mathbf{z}})$  gives the carrying capacity, which  
 430 depends on the SDS resident phenotype. From our assumptions  
 431 rendering  $\mathbf{A}(\bar{\mathbf{z}}, \bar{\mathbf{z}}, \bar{\mathbf{n}}^*(\bar{\mathbf{z}}))$  irreducible and primitive and from the  
 432 Perron-Frobenius theorem (Sternberg 2010, theorem 9.1.1), it fol-  
 433 lows that  $\mathbf{A}(\bar{\mathbf{z}}, \bar{\mathbf{z}}, \bar{\mathbf{n}}^*(\bar{\mathbf{z}}))$  has an eigenvalue  $\bar{\lambda} = 1$  that is strictly  
 434 greater than the absolute value of any other eigenvalue of the ma-  
 435 trix. This  $\bar{\lambda}$  describes the asymptotic growth rate of the resident  
 436 population, as the resident population dynamics equilibrium  
 437  $\bar{\mathbf{n}}^*(\bar{\mathbf{z}})$  is achieved.

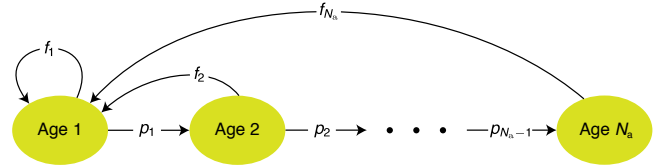

**Figure 4** Age-structured life cycle. The vital rates shown are those of rare mutants: a mutant of age  $a$  produces  $f_a$  offspring and survives to age  $a + 1$  with probability  $p_a$ . See text for the vital rates of the resident.

438 Once the resident population has reached the equilibrium  
 439  $\bar{\mathbf{n}}^*(\bar{\mathbf{z}})$ , we move on to the resident-mutant population dynam-  
 440 ics phase (Fig. 3). A rare mutant control  $\mathbf{y}$  arises, where  $\mathbf{y}$  is  
 441 a realization of a multivariate random variable. A mutant has  
 442 phenotype  $\mathbf{z} = (\mathbf{x}; \mathbf{y})$  where the states  $\mathbf{x}$  are given by the devel-  
 443 opmental constraint (Eq. 5); specifically, the states at age  $a + 1$   
 444 for an individual having the mutant control vector  $\mathbf{y}$  are given  
 445 by the developmental constraint

$$\mathbf{x}_{a+1} = \mathbf{g}_a(\mathbf{z}_a, \bar{\mathbf{z}}, \boldsymbol{\epsilon}_a), \quad (8)$$

446 for all  $a \in \{1, \dots, N_a - 1\}$  with initial condition  $\mathbf{x}_1 = \bar{\mathbf{x}}_1$ , where  
 447 the mutant's environment is given by the environmental con-  
 448 straint

$$\boldsymbol{\epsilon}_a = \mathbf{h}_a(\mathbf{z}_a, \bar{\mathbf{z}}, \tau). \quad (9)$$

449 Let  $n_a(t)$  denote the density of mutant individuals of age  
 450  $a \in \{1, \dots, N_a\}$  at ecological time  $t$ . The vector of mutant den-  
 451 sity at  $t$  is  $\mathbf{n}(t) = (n_1(t), \dots, n_{N_a}(t))^\top$ . Given clonal reproduc-  
 452 tion, the population dynamics of the resident and rare mutant  
 453 subpopulations are then given by the expanded system

$$\begin{pmatrix} \bar{\mathbf{n}}(t+1) \\ \mathbf{n}(t+1) \end{pmatrix} = \begin{pmatrix} \mathbf{A}(\bar{\mathbf{z}}, \bar{\mathbf{z}}, \bar{\mathbf{n}}(t)) & \mathbf{0} \\ \mathbf{0} & \mathbf{A}(\mathbf{z}, \bar{\mathbf{z}}, \bar{\mathbf{n}}(t)) \end{pmatrix} \begin{pmatrix} \bar{\mathbf{n}}(t) \\ \mathbf{n}(t) \end{pmatrix},$$

454 where the mutant projection matrix  $\mathbf{A}(\mathbf{z}, \bar{\mathbf{z}}, \bar{\mathbf{n}}(t))$  is given by  
 455 evaluating the first argument of  $\mathbf{A}(\bar{\mathbf{z}}, \bar{\mathbf{z}}, \bar{\mathbf{n}}(t))$  at the mutant phe-  
 456 notype. Hence,  $\mathbf{A}(\mathbf{z}, \bar{\mathbf{z}}, \bar{\mathbf{n}}(t))$  is a density-dependent Leslie ma-  
 457 trix whose  $ij$ -th entry is  $A_{ij}(\mathbf{z}_j, \bar{\mathbf{z}}, \bar{\mathbf{n}}(t))$  that gives either the age-  
 458 specific survival probability (for  $i > 1$ ) or the age-specific fertility  
 459 (for  $i = 1$ ) of mutant individuals in the context of the resident.  
 460 The rare mutant subpopulation thus has population dynamics  
 461 given by  $\mathbf{n}(t+1) = \mathbf{A}(\mathbf{z}, \bar{\mathbf{z}}, \bar{\mathbf{n}}(t))\mathbf{n}(t)$ .

462 As mutants are rare, the mutant population dynamics around  
 463 the resident equilibrium  $\bar{\mathbf{n}}^*(\bar{\mathbf{z}})$  are to first order of approximation  
 464 given by

$$\mathbf{n}(t+1) \approx \mathbf{J}\mathbf{n}(t), \quad (10)$$

465 where the local stability matrix for the mutant (Appendix 14) is

$$\mathbf{J} = \left. \frac{\partial \mathbf{A}(\mathbf{z}, \bar{\mathbf{z}}, \bar{\mathbf{n}})\mathbf{n}}{\partial \mathbf{n}^\top} \right|_{\mathbf{n}=\bar{\mathbf{n}}^*} = \left( \frac{\partial}{\partial n_j} \sum_{k=1}^{N_a} A_{ik}(\mathbf{z}_k, \bar{\mathbf{z}}, \bar{\mathbf{n}}) n_k \right) \Big|_{\bar{\mathbf{n}}=\bar{\mathbf{n}}^*} \\ = \left( A_{ij}(\mathbf{z}_j, \bar{\mathbf{z}}, \bar{\mathbf{n}}^*(\bar{\mathbf{z}})) \right).$$

466 Explicitly,

$$\mathbf{J} = \begin{pmatrix} f_1 & f_2 & \cdots & f_{N_a-1} & f_{N_a} \\ p_1 & 0 & \cdots & 0 & 0 \\ 0 & p_2 & \cdots & 0 & 0 \\ \vdots & \vdots & \ddots & \vdots & \vdots \\ 0 & 0 & \cdots & p_{N_a-1} & 0 \end{pmatrix}, \quad (11)$$

467 where we denote the mutant's fertility at age  $a$  at the resident  
468 population dynamics equilibrium as

$$f_a = f_a(\mathbf{z}_a, \bar{\mathbf{z}}, \boldsymbol{\epsilon}_a) = A_{1a}(\mathbf{z}_a, \bar{\mathbf{z}}, \bar{\mathbf{n}}^*(\bar{\mathbf{z}})) \quad (12a)$$

469 and the mutant's survival probability from age  $a$  to  $a + 1$  as

$$p_a = p_a(\mathbf{z}_a, \bar{\mathbf{z}}, \boldsymbol{\epsilon}_a) = A_{a+1,a}(\mathbf{z}_a, \bar{\mathbf{z}}, \bar{\mathbf{n}}^*(\bar{\mathbf{z}})). \quad (12b)$$

470 We denote the fertility of a neutral mutant of age  $a$  as  $f_a^\circ =$   
471  $f_a(\bar{\mathbf{z}}_a, \bar{\mathbf{z}}, \bar{\boldsymbol{\epsilon}}_a) = A_{1a}(\bar{\mathbf{z}}_a, \bar{\mathbf{z}}, \bar{\mathbf{n}}^*(\bar{\mathbf{z}}))$  and the survival probability of  
472 a neutral mutant from age  $a$  to  $a + 1$  as  $p_a^\circ = p_a(\bar{\mathbf{z}}_a, \bar{\mathbf{z}}, \bar{\boldsymbol{\epsilon}}_a) =$   
473  $A_{a+1,a}(\bar{\mathbf{z}}_a, \bar{\mathbf{z}}, \bar{\mathbf{n}}^*(\bar{\mathbf{z}}))$ , where the superscript  $\circ$  denotes evaluation  
474 at  $\mathbf{y} = \bar{\mathbf{y}}$  (so at  $\mathbf{z} = \bar{\mathbf{z}}$  as the resident is a socio-devo equilibrium).

### 475 **Evolutionary dynamics of controls**

476 We can now identify invasion fitness and use it to obtain an equa-  
477 tion describing the evolutionary dynamics of controls. Invasion  
478 fitness is the asymptotic growth rate of the mutant population  
479 and it enables the determination of whether the mutant invades  
480 the resident population (i.e., whether the mutation increases in  
481 frequency) (Otto and Day 2007). Because we assume that an  
482 individual's environment  $\boldsymbol{\epsilon}_\bullet$  only depends on ecological time  
483  $t$  through density dependence  $\bar{\mathbf{n}}(t)$  and because  $\mathbf{J}$  is evaluated  
484 at the resident equilibrium  $\bar{\mathbf{n}}^*$ , we have that  $\mathbf{J}$  is constant with  
485 respect to  $t$ . Therefore, the asymptotic population dynamics  
486 of the mutant subpopulation around the resident equilibrium  
487 are given to first order of approximation by the eigenvalues  
488 and eigenvectors of  $\mathbf{J}$ . As for residents, we assume that mu-  
489 tants in the last age class reproduce ( $f_{N_a} > 0$ ) and that mutants  
490 can survive to the last age class with non-zero probability (i.e.,  
491  $p_a > 0$  for all  $a \in \{1, \dots, N_a - 1\}$ ); so  $\mathbf{J}$  is irreducible (Sternberg  
492 2010, section 9.4). We similarly assume that mutants of at least  
493 two consecutive age classes have non-zero fertility (i.e.,  $f_a > 0$   
494 and  $f_{a+1} > 0$  for some  $a \in \{1, \dots, N_a - 1\}$ ); so  $\mathbf{J}$  is primitive  
495 (Sternberg 2010, section 9.4.1; i.e., raising  $\mathbf{J}$  to a sufficiently high  
496 power yields a matrix whose entries are all positive). Then, from  
497 the Perron-Frobenius theorem (Sternberg 2010, theorem 9.1.1),  
498  $\mathbf{J}$  has a real positive eigenvalue  $\lambda = \lambda(\mathbf{y}, \bar{\mathbf{y}})$  whose magnitude  
499 is strictly larger than that of the other eigenvalues. Such lead-  
500 ing eigenvalue  $\lambda$  is the asymptotic growth rate of the mutant  
501 population around the resident equilibrium, and thus gives the  
502 mutant's invasion fitness. Since the population dynamics of  
503 rare mutants are locally given by Eq. (10) where  $\mathbf{J}$  projects the  
504 mutant population to the next ecological time step, the mutant  
505 population invades when invasion fitness satisfies  $\lambda > 1$ .

506 We consider the evolutionary change in controls from the  
507 evolutionary time  $\tau$ , specifically the point at which the socio-  
508 devo stable resident is at carrying capacity as marked in Fig. 3,  
509 to the evolutionary time  $\tau + \Delta\tau$  at which a new socio-devo stable  
510 resident is at carrying capacity. The vector  $\mathbf{y}$  is a realization of a  
511 multivariate random variable  $\mathbf{y}$  with probability density  $M(\mathbf{y}, \bar{\mathbf{y}})$   
512 called the *mutational distribution* (Dieckmann and Law 1996),  
513 with support in  $\mathbb{R}^{N_a N_c}$  (abusing notation, we denote a random  
514 variable and its realization with the same symbol, as has been  
515 common practice—e.g., Lande 1979 and Lynch and Walsh 1998,  
516 p. 192). We assume that the mutational distribution is such that  
517 (i) the expected mutant control is the resident,  $E[\mathbf{y}] = \bar{\mathbf{y}}$ ; (ii)  
518 mutational variance is marginally small (i.e., selection is  $\delta$ -weak)  
519 such that  $0 < E[\|\mathbf{y} - \bar{\mathbf{y}}\|^2] = \text{tr}(\text{cov}[\mathbf{y}, \mathbf{y}]) = \sum_{i=1}^{N_c} \sum_{a=1}^{N_a} E[(y_{ia} -$   
520  $\bar{y}_{ia})^2] \ll 1$ ; and (iii) mutation is unbiased, that is, the mutational  
521 distribution is symmetric so skewness is  $E[(\mathbf{y} - \bar{\mathbf{y}})(\mathbf{y} - \bar{\mathbf{y}})^T(\mathbf{y} -$   
522  $\bar{\mathbf{y}})] = \mathbf{0}$ . Given small mutational variance, Taylor-expanding  $\lambda$

with respect to  $\mathbf{y}$  around  $\bar{\mathbf{y}}$ , invasion fitness is to first order of  
approximation given by

$$\lambda = 1 + (\mathbf{y} - \bar{\mathbf{y}})^T \left. \frac{d\lambda}{d\mathbf{y}} \right|_{\mathbf{y}=\bar{\mathbf{y}}} + O(\|\mathbf{y} - \bar{\mathbf{y}}\|^2), \quad (13)$$

where we use the fact that  $\lambda|_{\mathbf{y}=\bar{\mathbf{y}}} = 1$  due to density depen-  
dence. A given entry of the operator  $d/d\mathbf{y}|_{\mathbf{y}=\bar{\mathbf{y}}}$ , say  $d/dy_{ia}|_{\mathbf{y}=\bar{\mathbf{y}}}$ ,  
takes the total derivative with respect to  $y_{ia}$  while keeping all  
the other controls  $y_{jk}$  constant. Hence, we refer to  $d\lambda/d\mathbf{y}|_{\mathbf{y}=\bar{\mathbf{y}}}$   
as the *total selection gradient of controls*  $\mathbf{y}$ , which takes the total  
derivative considering both developmental constraints (Eq. 8)  
and environmental constraints (Eq. 9) (Appendix 16). Thus, the  
total selection gradient of controls can be interpreted as measur-  
ing *total genetic selection*. Since the mutant population invades  
when  $\lambda > 1$  and mutational variances are marginally small (i.e.,  
selection is  $\delta$ -weak), the mutant population invades if and only  
if

$$(\mathbf{y} - \bar{\mathbf{y}})^T \left. \frac{d\lambda}{d\mathbf{y}} \right|_{\mathbf{y}=\bar{\mathbf{y}}} > 0,$$

to first-order of approximation. The left-hand side of this in-  
equality is the dot product of total selection on controls and the  
realized mutational effect on controls  $(\mathbf{y} - \bar{\mathbf{y}})$ . The dot product  
is positive if and only if the absolute value of the smallest angle  
between two non-zero vectors is smaller than 90 degrees.  
Hence, the mutant population invades if and only if total selec-  
tion on controls has a vector component in the direction of the  
mutational effect on controls.

In Appendix 1, we show that the evolutionary dynamics  
of controls are given by a form of the canonical equation of  
adaptive dynamics:

$$\frac{\Delta\bar{\mathbf{y}}}{\Delta\tau} = \mathbf{G}_y \left. \frac{d\lambda}{d\mathbf{y}} \right|_{\mathbf{y}=\bar{\mathbf{y}}}, \quad (14a)$$

where

$$\mathbf{G}_y = \text{cov}[\mathbf{y}, \mathbf{y}] \quad (14b)$$

is equivalently the mutational covariance matrix (of controls)  
and the additive genetic covariance matrix of controls (cf. Eq. 6.1  
of Dieckmann and Law 1996, Eq. 23 of Durinx et al. 2008, p. 332  
of Fisher 1922, and Eq. 12 of Morrissey 2015). The canonical  
equation typically involves an additional scalar proportional  
to mutation rate and population size (cf. Eq. 6.1 of Dieckmann  
and Law 1996 and Eq. 23 of Durinx et al. 2008) but Eq. (14a)  
does not because of our assumption of deterministic population  
dynamics, consistently with previous results (e.g., Eqs. 6 and 25  
of Wagner 1989).

From our definition of  $\mathbf{y}$ ,  $\mathbf{G}_y$  is a block matrix whose  $aj$ -th  
block entry is the matrix  $\mathbf{G}_{y_a, y_j} = \text{cov}[\mathbf{y}_a, \mathbf{y}_j]$ , which is the mu-  
tational or additive genetic cross-covariance matrix of the controls  
 $\mathbf{y}_a$  at age  $a$  with the controls  $\mathbf{y}_j$  at age  $j$ . In turn, the  $ik$ -th entry of  
 $\mathbf{G}_{y_a, y_j}$  is  $G_{y_{ia}, y_{kj}} = \text{cov}[y_{ia}, y_{kj}]$  which is the mutational or addi-  
tive genetic covariance between the control  $y_{ia}$  and the control  
 $y_{kj}$ . Since  $\mathbf{y} \in \mathbb{R}^{N_a N_c \times 1}$ , then  $\mathbf{G}_y \in \mathbb{R}^{N_a N_c \times N_a N_c}$ .

Using a modification of the terminology of Houle (2001) and  
Klingenberg (2005, 2010), we say that there are no genetic con-  
straints for a vector  $\boldsymbol{\zeta}$  if and only if all the eigenvalues of its  
additive genetic covariance matrix  $\mathbf{G}_\boldsymbol{\zeta}$  are equal and positive;  
that there are only relative genetic constraints if and only if  $\mathbf{G}_\boldsymbol{\zeta}$   
has different eigenvalues but all are positive; and that there are  
absolute genetic constraints if and only if  $\mathbf{G}_\boldsymbol{\zeta}$  has at least one zero

eigenvalue (i.e.,  $\mathbf{G}_\zeta$  is singular). If  $\zeta = \mathbf{y}$ , we speak of mutational rather than genetic constraints. For example, we say there are absolute mutational constraints if and only if  $\mathbf{G}_\mathbf{y}$  is singular, in which case there is no mutational variation in some directions of control space. Hence, if there are absolute mutational constraints (i.e.,  $\mathbf{G}_\mathbf{y}$  is singular), the evolutionary dynamics of controls can stop (i.e.,  $\Delta\bar{\mathbf{y}}/\Delta\tau = \mathbf{0}$ ) with a non-zero total selection gradient of controls (i.e.,  $d\lambda/d\mathbf{y}|_{\mathbf{y}=\bar{\mathbf{y}}} \neq \mathbf{0}$ ) (because a homogeneous system  $\mathbf{A}\mathbf{x} = \mathbf{0}$  has non-zero solutions  $\mathbf{x}$  with  $\mathbf{A}$  singular if there is any solution to the system).

As the resident controls evolve, the resident state variables evolve. Specifically, at a given evolutionary time  $\tau$ , from Eq. (8) resident states are given by the recurrence equation

$$\bar{\mathbf{x}}_{a+1} = \mathbf{g}_a^\circ = \mathbf{g}_a(\bar{\mathbf{z}}_a, \bar{\mathbf{z}}, \bar{\boldsymbol{\epsilon}}_a), \quad (14c)$$

for all  $a \in \{1, \dots, N_a - 1\}$  with  $\bar{\mathbf{x}}_1$  constant and  $\bar{\boldsymbol{\epsilon}}_a = \mathbf{h}_a(\bar{\mathbf{z}}_a, \bar{\mathbf{z}}, \tau)$ . Intuitively, the evolutionary dynamics of states thus occur as an outgrowth of the evolutionary dynamics of controls and are modulated by the environmental dynamics.

Eq. (14a) describes the evolutionary dynamics of controls and Eq. (14c) describes the developmental dynamics of states, so together Eqs. (14) describe the evo-devo dynamics. To characterize the evo-devo process, we obtain general expressions for the total selection gradient of controls and for the evolutionary dynamics of the phenotype and the metaphenotype. To do this, we first derive the classical form of the selection gradient in age-structured populations, upon which we build our derivations.

### Selection gradient in age-structured populations

To calculate the evo-devo dynamics given by Eqs. (14), we need to calculate the total selection gradient of controls  $d\lambda/d\mathbf{y}|_{\mathbf{y}=\bar{\mathbf{y}}}$ . Since the life cycle is age structured (Eq. 11 and Fig. 4), the total selection gradient of controls has the form of the selection gradient in age structured populations, which is well-known but we re-derive it here for ease of reference.

We first use an eigenvalue perturbation theorem to write the selection gradient, which suggests a definition of relative fitness. Let  $\bar{\zeta}$  and  $\zeta$  respectively denote a resident and mutant trait value (or more specifically,  $\bar{\zeta}$  is an entry of  $\bar{\mathbf{m}}$  and  $\zeta$  is an entry of  $\mathbf{m}$ ). From a theorem on eigenvalue perturbation (Eq. 9 of Caswell 1978 or Eq. 9.10 of Caswell 2001), the selection gradient of  $\zeta$  is

$$\begin{aligned} \frac{\partial\lambda}{\partial\zeta}\Big|_{\mathbf{y}=\bar{\mathbf{y}}} &= \frac{1}{\mathbf{v}^\circ\mathbf{T}\mathbf{u}^\circ} \mathbf{v}^\circ\mathbf{T} \left( \frac{\partial\mathbf{J}}{\partial\zeta}\Big|_{\mathbf{y}=\bar{\mathbf{y}}} \right) \mathbf{u}^\circ \\ &= \frac{1}{\mathbf{v}^\circ\mathbf{T}\mathbf{u}^\circ} \sum_{i=1}^{N_a} \sum_{j=1}^{N_a} v_i^\circ \left( \frac{\partial J_{ij}}{\partial\zeta}\Big|_{\mathbf{y}=\bar{\mathbf{y}}} \right) u_j^\circ, \end{aligned} \quad (15)$$

where  $\mathbf{v}$  and  $\mathbf{u}$  are respectively dominant left and right eigenvectors of  $\mathbf{J}$  (Eq. 11). The vector  $\mathbf{v}$  lists the mutant reproductive values and the vector  $\mathbf{u}$  lists the mutant stable age distribution. In turn,  $\mathbf{v}^\circ = \mathbf{v}|_{\mathbf{y}=\bar{\mathbf{y}}}$  lists the neutral (mutant) reproductive values and  $\mathbf{u}^\circ = \mathbf{u}|_{\mathbf{y}=\bar{\mathbf{y}}}$  lists the neutral (mutant) stable age distribution. Substituting  $J_{ij}$  for the entries in Eq. (11) yields

$$\frac{\partial\lambda}{\partial\zeta}\Big|_{\mathbf{y}=\bar{\mathbf{y}}} = \frac{1}{\mathbf{v}^\circ\mathbf{T}\mathbf{u}^\circ} \sum_{j=1}^{N_a} u_j^\circ \left( v_1^\circ \frac{\partial f_j}{\partial\zeta}\Big|_{\mathbf{y}=\bar{\mathbf{y}}} + v_{j+1}^\circ \frac{\partial p_j}{\partial\zeta}\Big|_{\mathbf{y}=\bar{\mathbf{y}}} \right), \quad (16)$$

where we let  $v_{N_a+1} = 0$  without loss of generality. Eq. (15) motivates the definition of the relative fitness of a mutant individual per unit of generation time as

$$w = \frac{1}{\mathbf{v}^\circ\mathbf{T}\mathbf{u}^\circ} \mathbf{v}^\circ\mathbf{T}\mathbf{J}\mathbf{u}^\circ = \frac{1}{\mathbf{v}^\circ\mathbf{T}\mathbf{u}^\circ} \sum_{i=1}^{N_a} \sum_{j=1}^{N_a} v_i^\circ J_{ij} u_j^\circ \quad (17)$$

(cf. Lande 1982, his Eq. 12c) and of the relative fitness of a mutant individual of age  $j$  per unit of generation time as

$$w_j = \frac{1}{\mathbf{v}^\circ\mathbf{T}\mathbf{u}^\circ} \sum_{i=1}^{N_a} v_i^\circ J_{ij} u_i^\circ = \frac{1}{\mathbf{v}^\circ\mathbf{T}\mathbf{u}^\circ} u_j^\circ \left( v_1^\circ f_j + v_{j+1}^\circ p_j \right). \quad (18)$$

We now obtain that relative fitness depends on the so-called forces of selection, which decrease with age. Age-specific relative fitness (Eq. 18) depends on the neutral stable age distribution  $u_j^\circ$  and the neutral reproductive value  $v_{j+1}^\circ$ , which are well-known quantities but we re-derive them in Appendix 2 for ease of reference. We obtain that the neutral stable age distribution and neutral reproductive value are

$$u_j^\circ = \ell_j^\circ u_1^\circ \quad (19a)$$

$$v_j^\circ = \frac{1}{\ell_j^\circ} v_1^\circ \sum_{k=j}^{N_a} \ell_k^\circ f_k^\circ, \quad (19b)$$

for  $j \in \{1, \dots, N_a\}$  and where  $u_1^\circ$  and  $v_1^\circ$  can take any positive value. The quantity  $\ell_j^\circ = \prod_{k=1}^{j-1} p_k^\circ$  is the survivorship of neutral mutants from age 1 to age  $j$ . Hence, the weights on fertility and survival in Eq. (18) are

$$\frac{u_j^\circ v_1^\circ}{\mathbf{v}^\circ\mathbf{T}\mathbf{u}^\circ} = \frac{1}{T} \ell_j^\circ \quad (20a)$$

$$\frac{u_j^\circ v_{j+1}^\circ}{\mathbf{v}^\circ\mathbf{T}\mathbf{u}^\circ} = \frac{1}{T} \frac{1}{p_j^\circ} \sum_{k=j+1}^{N_a} \ell_k^\circ f_k^\circ, \quad (20b)$$

where generation time is

$$T = \sum_{j=1}^{N_a} j \ell_j^\circ f_j^\circ \quad (21)$$

(Charlesworth 1994, Eq. 1.47c; Bulmer 1994, Eq. 25, Ch. 25; Binvenvenu and Legendre 2015, Eqs. 5 and 12). Eqs. (19) and (20) recover classic equations (Hamilton 1966 and Caswell 1978, his Eqs. 11 and 12). We denote the forces of selection on fertility at age  $j$  as

$$\phi_j(\bar{\mathbf{z}}) = \ell_j^\circ \quad (22a)$$

and on survival at age  $j$  as

$$\pi_j(\bar{\mathbf{z}}) = \frac{1}{p_j^\circ} \sum_{k=j+1}^{N_a} \ell_k^\circ f_k^\circ, \quad (22b)$$

which are independent from the mutant trait value because they are evaluated at the resident trait value. It is easily checked that  $\phi_j$  and  $\pi_j$  decrease with  $j$  (respectively, if  $p_j^\circ < 1$  and  $f_{j+1}^\circ > 0$  provided that  $p_j^\circ$  changes smoothly with age).

We can then obtain a biologically informative expression for the selection gradient in terms relative fitness. Using Eqs. (18), (20), and (22), a mutant's relative fitness at age  $j$  is

$$w_j = \frac{1}{T} \left( \phi_j f_j + \pi_j p_j \right), \quad (23)$$

or with explicit arguments using Eq. (12),

$$w_j(\mathbf{z}_j, \bar{\mathbf{z}}, \boldsymbol{\epsilon}_j) = \frac{1}{T} \left[ \phi_j(\bar{\mathbf{z}}) f_j(\mathbf{z}_j, \bar{\mathbf{z}}, \boldsymbol{\epsilon}_j) + \pi_j(\bar{\mathbf{z}}) p_j(\mathbf{z}_j, \bar{\mathbf{z}}, \boldsymbol{\epsilon}_j) \right]. \quad (24)$$

Using Eqs. (17), (18), and (23), a mutant's relative fitness is

$$w = \sum_{j=1}^{N_a} w_j = \frac{1}{T} \sum_{j=1}^{N_a} \left( \phi_j f_j + \pi_j p_j \right), \quad (25)$$



649 or with explicit arguments,

$$w(\mathbf{z}, \bar{\mathbf{z}}, \boldsymbol{\epsilon}) = \sum_{j=1}^{N_a} w_j(\mathbf{z}_j, \bar{\mathbf{z}}, \boldsymbol{\epsilon}_j). \quad (26)$$

650 From Eqs. (15) and (17), the selection gradient entry for trait  $\zeta$  is

$$\frac{\partial \lambda}{\partial \zeta} \Big|_{\mathbf{y}=\bar{\mathbf{y}}} = \frac{\partial w}{\partial \zeta} \Big|_{\mathbf{y}=\bar{\mathbf{y}}} = \sum_{j=1}^{N_a} \frac{\partial w_j}{\partial \zeta} \Big|_{\mathbf{y}=\bar{\mathbf{y}}}.$$

651 The same procedure applies for total rather than partial deriva-  
652 tives, so the total selection gradient of  $\zeta$  is

$$\frac{d\lambda}{d\zeta} \Big|_{\mathbf{y}=\bar{\mathbf{y}}} = \frac{dw}{d\zeta} \Big|_{\mathbf{y}=\bar{\mathbf{y}}} = \sum_{j=1}^{N_a} \frac{dw_j}{d\zeta} \Big|_{\mathbf{y}=\bar{\mathbf{y}}}. \quad (27)$$

653 It is often convenient to write selection gradients in terms  
654 of lifetime reproductive success if possible. In Appendix 3, we  
655 re-derive that the selection gradients can be expressed in terms  
656 of expected lifetime reproductive success, as previously known  
657 (Bulmer 1994; Caswell 2009), because of our assumption that  
658 mutants arise when residents are at carrying capacity (Mylius  
659 and Diekmann 1995). For our life cycle, a mutant's expected  
660 lifetime reproductive success is

$$R_0 = \sum_{j=1}^{N_a} \ell_j f_j, \quad (28)$$

661 (Caswell 2001). In Appendix 3, we show that the selection gradi-  
662 ent can be written as

$$\frac{\partial \lambda}{\partial \zeta} \Big|_{\mathbf{y}=\bar{\mathbf{y}}} = \frac{1}{T} \frac{\partial R_0}{\partial \zeta} \Big|_{\mathbf{y}=\bar{\mathbf{y}}}, \quad (29a)$$

663 and that the total selection gradient can be written as

$$\frac{d\lambda}{d\zeta} \Big|_{\mathbf{y}=\bar{\mathbf{y}}} = \frac{1}{T} \frac{dR_0}{d\zeta} \Big|_{\mathbf{y}=\bar{\mathbf{y}}}, \quad (29b)$$

664 which recover previous equations (Bulmer 1994, Eq. 25 of Ch. 5;  
665 and Caswell 2009, Eqs. 58-61).

## 666 Data Availability

667 All data necessary for confirming the conclusions of the article  
668 are present within the article, figures, tables, and appendices.

## 669 Results

670 We obtain a series of equations that describe the evolutionary  
671 dynamics of genetic and developed traits as well as the environ-  
672 ment. Since developmental (Eq. 8) and environmental (Eq. 9)  
673 constraints are explicit, these equations provide formulas for ge-  
674 netic covariation and other high-level quantities from low-level  
675 mechanistic processes. We term the resulting set of equations  
676 the “evo-devo process”. It is convenient to arrange the evo-  
677 devo process in a layered structure, where each layer is formed  
678 by components in layers below (Fig. 5). We thus present the  
679 evo-devo process starting from the lowest-level layer up to the  
680 highest. The derivations of all these equations are provided in  
681 the Appendices.

## 682 Layer 1: elementary components

683 All the components of the evo-devo process can be calculated  
684 from models or estimation of five elementary components. These  
685 elementary components are the mutational covariance matrix  
686  $\mathbf{G}_y$ , fertility  $f_a(\mathbf{z}_a, \bar{\mathbf{z}}, \boldsymbol{\epsilon}_a)$ , survival probability  $p_a(\mathbf{z}_a, \bar{\mathbf{z}}, \boldsymbol{\epsilon}_a)$ , devel-  
687 opmental map  $\mathbf{g}_a(\mathbf{z}_a, \bar{\mathbf{z}}, \boldsymbol{\epsilon}_a)$ , and environmental map  $\mathbf{h}_a(\mathbf{z}_a, \bar{\mathbf{z}}, \tau)$   
688 for all ages  $a$  (Fig. 5, Layer 1).

## 689 Layer 2: direct effects

690 We now obtain the equations for the next layer, that of the direct-  
691 effect matrices which constitute nearly elementary components  
692 of the evo-devo process. Direct-effect matrices measure the effect  
693 that a variable has on another variable without considering any  
694 constraints. Direct-effect matrices capture various effects of  
695 age structure, including the declining forces of selection as age  
696 advances.

697 Direct-effect matrices include Lande's (1979) selection gradi-  
698 ents, which have the following structure due to age-structure.  
699 The *selection gradient of states* or, equivalently, the block column  
700 vector of *direct effects of a mutant's states on fitness* is

$$\begin{aligned} \frac{\partial w}{\partial \mathbf{x}} \Big|_{\mathbf{y}=\bar{\mathbf{y}}} &\equiv \left( \frac{\partial w}{\partial \mathbf{x}_1}; \dots; \frac{\partial w}{\partial \mathbf{x}_{N_a}} \right) \Big|_{\mathbf{y}=\bar{\mathbf{y}}} \\ &= \left( \frac{\partial w_1}{\partial \mathbf{x}_1}; \dots; \frac{\partial w_{N_a}}{\partial \mathbf{x}_{N_a}} \right) \Big|_{\mathbf{y}=\bar{\mathbf{y}}} \in \mathbb{R}^{N_a N_s \times 1}, \end{aligned} \quad (30)$$

701 which measures directional selection on developed traits (Lande  
702 1979). Note that the second line in Eq. (30) takes the derivative  
703 of fitness at each age, which from Eq. (24) contains weighted  
704 fertility and survival effects of states at each age. Similarly, the  
705 *selection gradient of controls* or, equivalently, the block column  
706 vector of *direct effects of a mutant's controls on fitness* is

$$\begin{aligned} \frac{\partial w}{\partial \mathbf{y}} \Big|_{\mathbf{y}=\bar{\mathbf{y}}} &\equiv \left( \frac{\partial w}{\partial \mathbf{y}_1}; \dots; \frac{\partial w}{\partial \mathbf{y}_{N_a}} \right) \Big|_{\mathbf{y}=\bar{\mathbf{y}}} \\ &= \left( \frac{\partial w_1}{\partial \mathbf{y}_1}; \dots; \frac{\partial w_{N_a}}{\partial \mathbf{y}_{N_a}} \right) \Big|_{\mathbf{y}=\bar{\mathbf{y}}} \in \mathbb{R}^{N_a N_c \times 1}, \end{aligned} \quad (31)$$

707 which measures directional selection on controls (Lande 1979).  
708 The *selection gradient of the environment* or, equivalently, the block  
709 column vector of *direct effects of a mutant's environment on fitness*  
710 is

$$\begin{aligned} \frac{\partial w}{\partial \boldsymbol{\epsilon}} \Big|_{\mathbf{y}=\bar{\mathbf{y}}} &\equiv \left( \frac{\partial w}{\partial \boldsymbol{\epsilon}_1}; \dots; \frac{\partial w}{\partial \boldsymbol{\epsilon}_{N_a}} \right) \Big|_{\mathbf{y}=\bar{\mathbf{y}}} \\ &= \left( \frac{\partial w_1}{\partial \boldsymbol{\epsilon}_1}; \dots; \frac{\partial w_{N_a}}{\partial \boldsymbol{\epsilon}_{N_a}} \right) \Big|_{\mathbf{y}=\bar{\mathbf{y}}} \in \mathbb{R}^{N_a N_e \times 1}, \end{aligned} \quad (32)$$

711 which measures the environmental sensitivity of selection  
712 (Chevin *et al.* 2010). The selection gradients in Eqs. (30)–(32)  
713 capture the declining forces of selection in that increasingly  
714 rightward block entries have smaller magnitude if survival and  
715 fertility effects are of the same magnitude as age increases.

716 We use the above definitions to form the selection gradients  
717 of the phenotype and metaphenotype. The *selection gradient of*  
718 *the phenotype* is

$$\frac{\partial w}{\partial \mathbf{z}} \Big|_{\mathbf{y}=\bar{\mathbf{y}}} \equiv \left( \frac{\partial w}{\partial \mathbf{x}}; \frac{\partial w}{\partial \mathbf{y}} \right) \Big|_{\mathbf{y}=\bar{\mathbf{y}}} \in \mathbb{R}^{N_a(N_s+N_c) \times 1},$$

719 and the *selection gradient of the metaphenotype* is

$$\frac{\partial w}{\partial \mathbf{m}} \Big|_{\mathbf{y}=\bar{\mathbf{y}}} \equiv \left( \frac{\partial w}{\partial \mathbf{x}}; \frac{\partial w}{\partial \mathbf{y}}; \frac{\partial w}{\partial \boldsymbol{\epsilon}} \right) \Big|_{\mathbf{y}=\bar{\mathbf{y}}} \in \mathbb{R}^{N_a(N_s+N_c+N_e) \times 1}.$$

|                                       | A Evolutionary-developmental dynamics                                                                                                                                                                                | B Evolutionary dynamics of the phenotype                                                                                                                                                                          | C Evolutionary dynamics of the metaphenotype                                                                                                                                                                                         |
|---------------------------------------|----------------------------------------------------------------------------------------------------------------------------------------------------------------------------------------------------------------------|-------------------------------------------------------------------------------------------------------------------------------------------------------------------------------------------------------------------|--------------------------------------------------------------------------------------------------------------------------------------------------------------------------------------------------------------------------------------|
| <b>Layer 7: evolutionary dynamics</b> | Developmental dynamics of states<br>$\bar{x}_{a+1} = G_a _{y=\bar{y}}$                                                                                                                                               | Evolutionary dynamics of controls<br>$\frac{\Delta \bar{y}}{\Delta \tau} = G_y \frac{dW}{dy}$                                                                                                                     | $\frac{d\bar{m}}{d\tau} = H_m \frac{\partial W}{\partial m} + s m \frac{\partial \mathcal{E}}{\partial \tau} = H_{m,y} \frac{dW}{dy} + \frac{s m}{s \mathcal{E}^T} \frac{\partial \mathcal{E}}{\partial \tau}$                       |
| <b>Layer 6: genetic covariation</b>   | Additive genetic covariance matrix of $\zeta$<br>$G_\zeta = G_{\zeta\zeta}$                                                                                                                                          | Additive socio-genetic cross-covariance matrix of $\zeta$<br>$H_\zeta = H_{\zeta\zeta}$                                                                                                                           | Additive genetic cross-covariance matrix of $\zeta$ and $\xi$<br>$G_{\zeta\xi} \equiv \text{cov}[a_\zeta, a_\xi] = \frac{d\zeta}{dy^T} G_y \frac{d\xi^T}{dy}$                                                                        |
| <b>Layer 5: stabilized effects</b>    | of a focal individual's controls on states<br>$\frac{sy}{sy^T} = I$                                                                                                                                                  | of a focal individual's environment on states<br>$\frac{sx}{s\bar{x}^T} = \frac{sx}{s\bar{x}^T} \frac{dx}{d\bar{x}^T}$                                                                                            | of focal's states on partners' states<br>$\frac{sx}{s\bar{x}^T} = \left( I - \frac{dx}{d\bar{x}^T} \right)^{-1}$                                                                                                                     |
| <b>Layer 4: total effects</b>         | of mutant's controls on fitness<br>$\frac{dW}{dy} = \frac{dm^T}{dy} \frac{\partial W}{\partial m}$                                                                                                                   | of mutant's controls on her controls, and of mutant's states on her states<br>$\frac{dy^T}{dy} = I$                                                                                                               | of mutant's controls on her environment<br>$\frac{d\mathcal{E}^T}{dy} = \frac{dz^T}{dy} \frac{\partial \mathcal{E}^T}{\partial z}$                                                                                                   |
| <b>Layer 3: semi-total effects</b>    | of mutant's states, controls, or phenotype on fitness<br>$\frac{\delta W}{\delta \zeta} = \frac{\partial W}{\partial \zeta} + \frac{\partial \mathcal{E}^T}{\partial \zeta} \frac{\partial W}{\partial \mathcal{E}}$ | of mutant's states or controls on her states<br>$\frac{\delta x^T}{\delta \zeta} = \frac{\partial x^T}{\partial \zeta} + \frac{\partial \mathcal{E}^T}{\partial \zeta} \frac{\partial x^T}{\partial \mathcal{E}}$ | of social partners' states or controls on mutant's states<br>$\frac{\delta x^T}{\delta \bar{z}} = \frac{\partial x^T}{\partial \bar{z}} + \frac{\partial \mathcal{E}^T}{\partial \bar{z}} \frac{\partial x^T}{\partial \mathcal{E}}$ |
| <b>Layer 2: direct effects</b>        | of mutant's states or controls on her fitness<br>$\frac{\partial W}{\partial \zeta}$                                                                                                                                 | of mutant's states or controls on her environment<br>$\frac{\partial \mathcal{E}^T}{\partial \zeta}$                                                                                                              | of mutant's environment on her fitness<br>$\frac{\partial W}{\partial \mathcal{E}}$                                                                                                                                                  |
| <b>Layer 1: elementary components</b> | Mutational covariation<br>$G_y$                                                                                                                                                                                      | Fertility<br>$f_a$                                                                                                                                                                                                | Survival<br>$p_a$                                                                                                                                                                                                                    |

**Figure 5** The evo-devo process and its layered structure. Here we summarize the equations composing the evo-devo process arranged in a layered structure. Each layer is formed by components in layers below. Layer 7 describes the evolutionary dynamics equivalently as (A) evo-devo dynamics, as (B) evolutionary dynamics of the phenotype, or as (C) evolutionary dynamics of the metaphenotype. (D) Layer 6 describes genetic covariation. (E) Layer 5 describes stabilized effects (total derivatives after socio-devo stabilization, denoted by  $s/s$ ). (F) Layer 4 describes total effects (total derivatives before socio-devo stabilization, denoted by  $d/d$ , which consider both developmental and environmental constraints). (G) Layer 3 describes semi-total effects (semi-total derivatives, denoted by  $\delta/\delta$ , that is, total derivatives considering environmental but not developmental constraints). (H) Layer 2 describes direct effects (partial derivatives, denoted by  $\partial/\partial$ , which do not consider any constraints). (I) Layer 1 comprises the elementary components of the evo-devo process that generate all layers above. All derivatives are evaluated at  $y = \bar{y}$ . See text for the equations of direct-effect matrices, which have structure due to age structure. See Fig. 2 and Table 1 for the meaning of symbols.

720 Direct-effect matrices also include matrices that measure developmental bias. These matrices have specific, sparse structure  
721 due to the *arrow of developmental time*: changing a trait at a given  
722 age cannot have effects on the developmental past of the individual  
723 and only directly affects the developmental present or  
724 immediate future. The block matrix of *direct effects of a mutant's*  
725 *states on her states* is

$$\frac{\partial x^T}{\partial x} \Big|_{y=\bar{y}} \equiv \begin{pmatrix} \frac{\partial x_1^T}{\partial x_1} & \dots & \frac{\partial x_{N_a}^T}{\partial x_1} \\ \vdots & \ddots & \vdots \\ \frac{\partial x_1^T}{\partial x_{N_a}} & \dots & \frac{\partial x_{N_a}^T}{\partial x_{N_a}} \end{pmatrix} \Big|_{y=\bar{y}}$$

$$= \begin{pmatrix} I & \frac{\partial x_2^T}{\partial x_1} & \dots & 0 & 0 \\ 0 & I & \dots & 0 & 0 \\ \vdots & \vdots & \ddots & \vdots & \vdots \\ 0 & 0 & \dots & I & \frac{\partial x_{N_a}^T}{\partial x_{N_a-1}} \\ 0 & 0 & \dots & 0 & I \end{pmatrix} \Big|_{y=\bar{y}} \quad (33a)$$

$$\in \mathbb{R}^{N_a N_s \times N_a N_s},$$

727 which can be understood as measuring developmental bias from  
728 states. The equality (33a) follows because the direct effects of a  
729 mutant's states on her states are only non-zero at the next age  
730 (from the developmental constraint in Eq. 8) or when states are  
731 differentiated with respect to themselves. Analogously, the block  
732 matrix of *direct effects of a mutant's controls on her states* is

$$\frac{\partial x^T}{\partial y} \Big|_{y=\bar{y}} \equiv \begin{pmatrix} \frac{\partial x_1^T}{\partial y_1} & \dots & \frac{\partial x_{N_a}^T}{\partial y_1} \\ \vdots & \ddots & \vdots \\ \frac{\partial x_1^T}{\partial y_{N_a}} & \dots & \frac{\partial x_{N_a}^T}{\partial y_{N_a}} \end{pmatrix} \Big|_{y=\bar{y}}$$

$$= \begin{pmatrix} 0 & \frac{\partial x_2^T}{\partial y_1} & \dots & 0 & 0 \\ 0 & 0 & \dots & 0 & 0 \\ \vdots & \vdots & \ddots & \vdots & \vdots \\ 0 & 0 & \dots & 0 & \frac{\partial x_{N_a}^T}{\partial y_{N_a-1}} \\ 0 & 0 & \dots & 0 & 0 \end{pmatrix} \Big|_{y=\bar{y}} \quad (33b)$$

$$\in \mathbb{R}^{N_a N_c \times N_a N_s},$$

733 which can be understood as measuring developmental bias from  
734 controls. Note that the main block diagonal is zero.

735 Direct-effect matrices also include a matrix measuring plas-  
736 ticity. Indeed, the block matrix of *direct effects of a mutant's envi-*  
737 *ronment on her states* is

$$\begin{aligned} \left. \frac{\partial \mathbf{x}^\top}{\partial \boldsymbol{\epsilon}} \right|_{\mathbf{y}=\bar{\mathbf{y}}} &\equiv \left( \begin{array}{ccc} \frac{\partial \mathbf{x}_1^\top}{\partial \boldsymbol{\epsilon}_1} & \cdots & \frac{\partial \mathbf{x}_{N_a}^\top}{\partial \boldsymbol{\epsilon}_1} \\ \vdots & \ddots & \vdots \\ \frac{\partial \mathbf{x}_1^\top}{\partial \boldsymbol{\epsilon}_{N_a}} & \cdots & \frac{\partial \mathbf{x}_{N_a}^\top}{\partial \boldsymbol{\epsilon}_{N_a}} \end{array} \right) \Bigg|_{\mathbf{y}=\bar{\mathbf{y}}} \\ &= \left( \begin{array}{ccccc} 0 & \frac{\partial \mathbf{x}_2^\top}{\partial \boldsymbol{\epsilon}_1} & \cdots & 0 & 0 \\ 0 & 0 & \cdots & 0 & 0 \\ \vdots & \vdots & \ddots & \vdots & \vdots \\ 0 & 0 & \cdots & 0 & \frac{\partial \mathbf{x}_{N_a}^\top}{\partial \boldsymbol{\epsilon}_{N_a-1}} \\ 0 & 0 & \cdots & 0 & 0 \end{array} \right) \Bigg|_{\mathbf{y}=\bar{\mathbf{y}}} \quad (33c) \\ &\in \mathbb{R}^{N_a N_e \times N_a N_s}, \end{aligned}$$

738 which can be understood as measuring plasticity (Noble et al.  
739 2019).

740 In turn, direct-effect matrices include matrices describing  
741 niche construction. The block matrix of *direct effects of a mutant's*  
742 *states or controls on her environment* is

$$\begin{aligned} \left. \frac{\partial \boldsymbol{\epsilon}^\top}{\partial \boldsymbol{\zeta}} \right|_{\mathbf{y}=\bar{\mathbf{y}}} &\equiv \left( \begin{array}{ccc} \frac{\partial \boldsymbol{\epsilon}_1^\top}{\partial \zeta_1} & \cdots & \frac{\partial \boldsymbol{\epsilon}_{N_a}^\top}{\partial \zeta_1} \\ \vdots & \ddots & \vdots \\ \frac{\partial \boldsymbol{\epsilon}_1^\top}{\partial \zeta_{N_a}} & \cdots & \frac{\partial \boldsymbol{\epsilon}_{N_a}^\top}{\partial \zeta_{N_a}} \end{array} \right) \Bigg|_{\mathbf{y}=\bar{\mathbf{y}}} \\ &= \left( \begin{array}{ccccc} \frac{\partial \boldsymbol{\epsilon}_1^\top}{\partial \zeta_1} & 0 & \cdots & 0 & 0 \\ 0 & \frac{\partial \boldsymbol{\epsilon}_2^\top}{\partial \zeta_2} & \cdots & 0 & 0 \\ \vdots & \vdots & \ddots & \vdots & \vdots \\ 0 & 0 & \cdots & \frac{\partial \boldsymbol{\epsilon}_{N_a-1}^\top}{\partial \zeta_{N_a-1}} & 0 \\ 0 & 0 & \cdots & 0 & \frac{\partial \boldsymbol{\epsilon}_{N_a}^\top}{\partial \zeta_{N_a}} \end{array} \right) \Bigg|_{\mathbf{y}=\bar{\mathbf{y}}} \quad (33d) \end{aligned}$$

743 for  $\boldsymbol{\zeta} \in \{\bar{\mathbf{x}}, \bar{\mathbf{y}}\}$ , which can be understood as measuring niche con-  
744 struction by states or controls. The equality (33d) follows from  
745 the environmental constraint in Eq. (9) since the environment  
746 faced by a mutant at a given age is directly affected by mutant  
747 states or controls at the same age only (i.e.,  $\partial \boldsymbol{\epsilon}_j^\top / \partial \zeta_a = \mathbf{0}$  for  
748  $a \neq j$ ).

749 Direct-effect matrices also include matrices describing mutual  
750 environmental dependence. The block matrix of *direct effects of a*  
751 *mutant's environment on itself* is

$$\left. \frac{\partial \boldsymbol{\epsilon}^\top}{\partial \boldsymbol{\epsilon}} \right|_{\mathbf{y}=\bar{\mathbf{y}}} \equiv \left( \begin{array}{ccc} \frac{\partial \boldsymbol{\epsilon}_1^\top}{\partial \boldsymbol{\epsilon}_1} & \cdots & \frac{\partial \boldsymbol{\epsilon}_{N_a}^\top}{\partial \boldsymbol{\epsilon}_1} \\ \vdots & \ddots & \vdots \\ \frac{\partial \boldsymbol{\epsilon}_1^\top}{\partial \boldsymbol{\epsilon}_{N_a}} & \cdots & \frac{\partial \boldsymbol{\epsilon}_{N_a}^\top}{\partial \boldsymbol{\epsilon}_{N_a}} \end{array} \right) \Bigg|_{\mathbf{y}=\bar{\mathbf{y}}}$$

$$\begin{aligned} &= \left( \begin{array}{ccccc} \frac{\partial \boldsymbol{\epsilon}_1^\top}{\partial \boldsymbol{\epsilon}_1} & 0 & \cdots & 0 & 0 \\ 0 & \frac{\partial \boldsymbol{\epsilon}_2^\top}{\partial \boldsymbol{\epsilon}_2} & \cdots & 0 & 0 \\ \vdots & \vdots & \ddots & \vdots & \vdots \\ 0 & 0 & \cdots & \frac{\partial \boldsymbol{\epsilon}_{N_a-1}^\top}{\partial \boldsymbol{\epsilon}_{N_a-1}} & 0 \\ 0 & 0 & \cdots & 0 & \frac{\partial \boldsymbol{\epsilon}_{N_a}^\top}{\partial \boldsymbol{\epsilon}_{N_a}} \end{array} \right) \Bigg|_{\mathbf{y}=\bar{\mathbf{y}}} \\ &= \mathbf{I} \in \mathbb{R}^{N_a N_e \times N_a N_e}, \quad (34) \end{aligned}$$

752 which measures mutual environmental dependence. The second-  
753 to-last equality follows from the environmental constraint (Eq. 9)  
754 and the last equality follows from our assumption that environ-  
755 mental variables are mutually independent, so  $\partial \boldsymbol{\epsilon}_a^\top / \partial \boldsymbol{\epsilon}_a |_{\mathbf{y}=\bar{\mathbf{y}}} = \mathbf{I}$   
756 for all  $a \in \{1, \dots, N_a\}$ . It is conceptually useful to write  
757  $\partial \boldsymbol{\epsilon}^\top / \partial \boldsymbol{\epsilon} |_{\mathbf{y}=\bar{\mathbf{y}}}$  rather than only  $\mathbf{I}$ , and we do so throughout.

758 Additionally, direct-effect matrices include matrices describ-  
759 ing social developmental bias, which capture effects of extra-  
760 genetic inheritance and indirect genetic effects. The block matrix  
761 of *direct effects of social partners' states or controls on a mutant's*  
762 *states* is

$$\begin{aligned} \left. \frac{\partial \mathbf{x}^\top}{\partial \bar{\boldsymbol{\zeta}}} \right|_{\mathbf{y}=\bar{\mathbf{y}}} &\equiv \left( \begin{array}{ccc} \frac{\partial \mathbf{x}_1^\top}{\partial \bar{\zeta}_1} & \cdots & \frac{\partial \mathbf{x}_{N_a}^\top}{\partial \bar{\zeta}_1} \\ \vdots & \ddots & \vdots \\ \frac{\partial \mathbf{x}_1^\top}{\partial \bar{\zeta}_{N_a}} & \cdots & \frac{\partial \mathbf{x}_{N_a}^\top}{\partial \bar{\zeta}_{N_a}} \end{array} \right) \Bigg|_{\mathbf{y}=\bar{\mathbf{y}}} \\ &= \left( \begin{array}{ccccc} 0 & \frac{\partial \mathbf{x}_2^\top}{\partial \bar{\zeta}_1} & \cdots & \frac{\partial \mathbf{x}_{N_a}^\top}{\partial \bar{\zeta}_1} \\ 0 & \frac{\partial \mathbf{x}_2^\top}{\partial \bar{\zeta}_2} & \cdots & \frac{\partial \mathbf{x}_{N_a}^\top}{\partial \bar{\zeta}_2} \\ \vdots & \vdots & \ddots & \vdots \\ 0 & \frac{\partial \mathbf{x}_2^\top}{\partial \bar{\zeta}_{N_a}} & \cdots & \frac{\partial \mathbf{x}_{N_a}^\top}{\partial \bar{\zeta}_{N_a}} \end{array} \right) \Bigg|_{\mathbf{y}=\bar{\mathbf{y}}}, \quad (35) \end{aligned}$$

763 for  $\bar{\boldsymbol{\zeta}} \in \{\bar{\mathbf{x}}, \bar{\mathbf{y}}\}$ , where the equality follows because states  $\mathbf{x}_1$  at the  
764 initial age are constant. The matrix in Eq. (35) can be understood  
765 as measuring social developmental bias from either states or  
766 controls, including extra-genetic inheritance and indirect genetic  
767 effects. This matrix can be less sparse than previous direct-effect  
768 matrices because the mutant's states can be affected by the states  
769 or controls of social partners of *any* age.

770 Direct-effect matrices also include matrices describing social  
771 niche construction. The block matrix of *direct effects of social*  
772 *partners' states or controls on a mutant's environment* is

$$\left. \frac{\partial \boldsymbol{\epsilon}^\top}{\partial \bar{\boldsymbol{\zeta}}} \right|_{\mathbf{y}=\bar{\mathbf{y}}} \equiv \left( \begin{array}{ccc} \frac{\partial \boldsymbol{\epsilon}_1^\top}{\partial \bar{\zeta}_1} & \cdots & \frac{\partial \boldsymbol{\epsilon}_{N_a}^\top}{\partial \bar{\zeta}_1} \\ \vdots & \ddots & \vdots \\ \frac{\partial \boldsymbol{\epsilon}_1^\top}{\partial \bar{\zeta}_{N_a}} & \cdots & \frac{\partial \boldsymbol{\epsilon}_{N_a}^\top}{\partial \bar{\zeta}_{N_a}} \end{array} \right) \Bigg|_{\mathbf{y}=\bar{\mathbf{y}}}, \quad (36)$$

773 for  $\bar{\boldsymbol{\zeta}} \in \{\bar{\mathbf{x}}, \bar{\mathbf{y}}\}$ , which can be understood as measuring social  
774 niche construction by either states or controls. This matrix does  
775 not contain any zero entries in general because the mutant's

environment at any age can be affected by the states or controls of social partners of any age.

We use the above definitions to form direct-effect matrices measuring niche construction by the phenotype and social niche construction by partners' phenotypes. The block matrix of *direct effects of a mutant's phenotype on her environment* is

$$\left. \frac{\partial \boldsymbol{\epsilon}^T}{\partial \mathbf{z}} \right|_{\mathbf{y}=\bar{\mathbf{y}}} \equiv \left( \frac{\partial \boldsymbol{\epsilon}^T}{\partial \mathbf{x}}; \frac{\partial \boldsymbol{\epsilon}^T}{\partial \mathbf{y}} \right) \Big|_{\mathbf{y}=\bar{\mathbf{y}}} \in \mathbb{R}^{N_a(N_s+N_c) \times N_a N_e}, \quad (37)$$

which measures niche construction by the phenotype. The block matrix of *direct effects of social partners' phenotypes on a mutant's environment* is

$$\left. \frac{\partial \boldsymbol{\epsilon}^T}{\partial \bar{\mathbf{z}}} \right|_{\mathbf{y}=\bar{\mathbf{y}}} = \left( \frac{\partial \boldsymbol{\epsilon}^T}{\partial \bar{\mathbf{x}}}; \frac{\partial \boldsymbol{\epsilon}^T}{\partial \bar{\mathbf{y}}} \right) \Big|_{\mathbf{y}=\bar{\mathbf{y}}} \in \mathbb{R}^{N_a(N_s+N_c) \times N_a N_e}, \quad (38)$$

which measures social niche construction by partners' phenotypes.

We will see that the evolutionary dynamics of the environment depends on a matrix measuring "inclusive" niche construction. This matrix is the transpose of the matrix of *direct social effects of a focal individual's phenotype on hers and a partner's environment*

$$\left. \frac{\partial (\boldsymbol{\epsilon} + \check{\boldsymbol{\epsilon}})}{\partial \bar{\mathbf{z}}} \right|_{\mathbf{y}=\bar{\mathbf{y}}} = \left( \frac{\partial \boldsymbol{\epsilon}}{\partial \mathbf{z}^T} + \frac{\partial \check{\boldsymbol{\epsilon}}}{\partial \bar{\mathbf{z}}^T} \right) \Big|_{\mathbf{y}=\bar{\mathbf{y}}} \in \mathbb{R}^{N_a N_e \times N_a(N_s+N_c)}, \quad (39)$$

where we denote by  $\check{\boldsymbol{\epsilon}}$  the environment a resident experiences when she develops in the context of mutants (a donor perspective for the mutant). Thus, this matrix can be interpreted as inclusive niche construction by the phenotype. Note that the second term on the right-hand side of Eq. (39) is the direct effects of social partners' phenotypes on a focal mutant (a recipient perspective for the mutant). Thus, inclusive niche construction by the phenotype can be equivalently interpreted either from a donor or a recipient perspective.

### Layer 3: semi-total effects

We now proceed to obtain the equations of the next layer of the evo-devo process, that of semi-total effects. Semi-total-effect matrices measure the total effects that a variable has on another variable considering environmental constraints, without considering developmental constraints (Appendix 16).

Semi-total-effect matrices include semi-total selection gradients, which capture some of the effects of niche construction. The *semi-total selection gradient* of vector  $\boldsymbol{\zeta} \in \{\mathbf{x}, \mathbf{y}, \mathbf{z}\}$  is

$$\left. \frac{\delta w}{\delta \boldsymbol{\zeta}} \right|_{\mathbf{y}=\bar{\mathbf{y}}} = \left( \frac{\partial w}{\partial \boldsymbol{\zeta}} + \frac{\partial \boldsymbol{\epsilon}^T}{\partial \boldsymbol{\zeta}} \frac{\partial w}{\partial \boldsymbol{\epsilon}} \right) \Big|_{\mathbf{y}=\bar{\mathbf{y}}}. \quad (40)$$

Thus, the semi-total selection gradient of  $\boldsymbol{\zeta}$  depends on directional selection on  $\boldsymbol{\zeta}$ , niche construction by  $\boldsymbol{\zeta}$ , and environmental sensitivity of selection, without considering developmental constraints. Consequently, semi-total selection gradients measure semi-total selection, which is directional selection in the fitness landscape modified by the interaction of niche construction and environmental sensitivity of selection.

Semi-total selection on the environment equals directional selection on the environment because we assume environmental variables are mutually independent. The *semi-total selection gradient of the environment* is

$$\left. \frac{\delta w}{\delta \boldsymbol{\epsilon}} \right|_{\mathbf{y}=\bar{\mathbf{y}}} = \left( \frac{\partial \boldsymbol{\epsilon}^T}{\partial \boldsymbol{\epsilon}} \frac{\partial w}{\partial \boldsymbol{\epsilon}} \right) \Big|_{\mathbf{y}=\bar{\mathbf{y}}} \in \mathbb{R}^{N_a N_e \times 1}. \quad (41)$$

Given our assumption that environmental variables are mutually independent, the matrix of direct effects of the environment on itself is the identity matrix. Thus, the semi-total selection gradient of the environment equals the selection gradient of the environment.

Semi-total-effect matrices also include matrices describing semi-total developmental bias, which capture additional effects of niche construction. The block matrix of *semi-total effects of  $\boldsymbol{\zeta} \in \{\mathbf{x}, \mathbf{y}, \bar{\mathbf{x}}, \bar{\mathbf{y}}\}$  on a mutant's states* is

$$\left. \frac{\delta \mathbf{x}^T}{\delta \boldsymbol{\zeta}} \right|_{\mathbf{y}=\bar{\mathbf{y}}} = \left( \frac{\partial \mathbf{x}^T}{\partial \boldsymbol{\zeta}} + \frac{\partial \boldsymbol{\epsilon}^T}{\partial \boldsymbol{\zeta}} \frac{\partial \mathbf{x}^T}{\partial \boldsymbol{\epsilon}} \right) \Big|_{\mathbf{y}=\bar{\mathbf{y}}}. \quad (42)$$

Thus, the semi-total effects of  $\boldsymbol{\zeta}$  on states depend on the developmental bias from  $\boldsymbol{\zeta}$ , niche construction by  $\boldsymbol{\zeta}$ , and plasticity, without considering developmental constraints. Consequently, semi-total effects on states can be interpreted as measuring semi-total developmental bias, which measures developmental bias in the developmental process modified by the interaction of niche construction and plasticity.

Finally, semi-total-effect matrices include matrices describing semi-total plasticity, which equals plasticity because environmental variables are mutually independent. The block matrix of *semi-total effects of a mutant's environment on her states* is

$$\left. \frac{\delta \mathbf{x}^T}{\delta \boldsymbol{\epsilon}} \right|_{\mathbf{y}=\bar{\mathbf{y}}} = \frac{\partial \boldsymbol{\epsilon}^T}{\partial \boldsymbol{\epsilon}} \frac{\partial \mathbf{x}^T}{\partial \boldsymbol{\epsilon}} \Big|_{\mathbf{y}=\bar{\mathbf{y}}} \in \mathbb{R}^{N_a N_e \times N_a N_s}. \quad (43)$$

Given our assumption that environmental variables are mutually independent, the matrix of direct effects of the environment on itself is the identity matrix. Thus, the semi-total effects of the environment on the states, or semi-total plasticity, equal the direct effects of the environment on states, that is, plasticity.

### Layer 4: total effects

We now move to obtain equations for the next layer of the evo-devo process, that of total-effect matrices. Total-effect matrices measure the total effects of a variable on another one considering both developmental and environmental constraints, but before the effects of social development have stabilized in the population.

The total effects of states on themselves describe developmental feedback. The block matrix of *total effects of a mutant's states on her states* is

$$\left. \frac{d\mathbf{x}^T}{d\mathbf{x}} \right|_{\mathbf{y}=\bar{\mathbf{y}}} = \left( 2\mathbf{I} - \frac{\delta \mathbf{x}^T}{\delta \mathbf{x}} \right)^{-1} \Big|_{\mathbf{y}=\bar{\mathbf{y}}} = \sum_{a=1}^{N_a} \left( \frac{\delta \mathbf{x}^T}{\delta \mathbf{x}} - \mathbf{I} \right)^{a-1} \in \mathbb{R}^{N_a N_s \times N_a N_s}, \quad (44)$$

which we prove is always invertible (Appendix 4, Eq. A32). This matrix can be interpreted as a lifetime collection of developmentally immediate pulses of semi-total effects of states on themselves. Thus, total effects of states on themselves describe total developmental bias from states, or *developmental feedback* which may cause major phenotypic effects at subsequent ages. By depending on semi-total developmental bias from states, developmental feedback depends on developmental bias from states, niche-construction by states, and plasticity (Eq. 42). Eq. (44) has the same form of an equation provided by Morrissey (2014) for his total-effect matrix of traits on themselves (his Eq. 2) if there is no plasticity or niche construction by states.

868 The total effects of controls on states correspond to Wagner's  
869 developmental matrix. The block matrix of *total effects of a mutant's controls on her states* is given by

$$\frac{dx^T}{dy} \Big|_{y=\bar{y}} = \left( \frac{\delta x^T}{\delta y} \frac{dx^T}{dx} \right) \Big|_{y=\bar{y}} \in \mathbb{R}^{N_a N_c \times N_a N_s}, \quad (45)$$

871 which is singular because initial states are not affected by any  
872 control and final controls do not affect any state (so  $dx^T/dy|_{y=\bar{y}}$   
873 has rows and columns that are zero; Appendix 5, Eq. A54). From  
874 Eq. (45), this matrix can be interpreted as involving a develop-  
875 mentally immediate pulse caused by a change in controls  
876 followed by the developmental feedback triggered among states.  
877 The matrix of total effects of controls on states measures total  
878 developmental bias from controls and corresponds to Wagner's  
879 (1984, 1989) developmental matrix (his **B**) (see also Martin 2014).

880 The total effects of the environment on states measure total  
881 plasticity. The block matrix of *total effects of a mutant's environment on her states* is

$$\frac{dx^T}{d\epsilon} \Big|_{y=\bar{y}} = \left( \frac{\delta x^T}{\delta \epsilon} \frac{dx^T}{dx} \right) \Big|_{y=\bar{y}} \in \mathbb{R}^{N_a N_e \times N_a N_s}, \quad (46)$$

883 which measures total plasticity, considering both environmen-  
884 tal and developmental constraints. Thus, total plasticity can  
885 be interpreted as a developmentally immediate pulse of plas-  
886 tic change followed by the developmental feedback triggered  
887 among states.

888 The total effects of social partners' controls or states on states  
889 measure total social developmental bias. The block matrix of  
890 *total effects of social partners' states or controls on a mutant's states* is

$$\frac{dx^T}{d\bar{\zeta}} \Big|_{y=\bar{y}} = \left( \frac{\delta x^T}{\delta \bar{\zeta}} \frac{dx^T}{dx} \right) \Big|_{y=\bar{y}} \quad (47)$$

891 for  $\bar{\zeta} \in \{\bar{x}, \bar{y}\}$ . This matrix can be interpreted as measuring total  
892 social developmental bias from states or controls, as well as total  
893 effects on states of extra-genetic inheritance, and total indirect  
894 genetic effects. From Eq. (47), total social developmental bias can  
895 be interpreted as a developmentally immediate pulse caused by  
896 a change in social partners' traits followed by the developmental  
897 feedback triggered among the mutant's states.

898 Total effects on controls are simple since controls are open-  
899 loop. The block matrix of *total effects of a mutant's controls on themselves* is

$$\frac{dy^T}{dy} \Big|_{y=\bar{y}} = \mathbf{I} \in \mathbb{R}^{N_a N_c \times N_a N_c}, \quad (48)$$

901 and the block matrix of *total effects of a vector  $\zeta \in \{x, \epsilon, \bar{x}, \bar{y}, \bar{z}, \bar{\epsilon}, \bar{m}\}$  on a mutant's controls* is

$$\frac{dy^T}{d\bar{\zeta}} \Big|_{y=\bar{y}} = \mathbf{0}.$$

903 These two equations follow because controls are open-loop (Ap-  
904 pendix 5, Eq. A51).

905 Total effects of states and controls on the environment quan-  
906 tify total niche construction. Total niche construction by states is  
907 quantified by the block matrix of *total effects of a mutant's states on her environment*

$$\frac{d\epsilon^T}{dx} \Big|_{y=\bar{y}} = \left( \frac{dx^T}{dx} \frac{\partial \epsilon^T}{\partial x} \right) \Big|_{y=\bar{y}}$$

$$= \left( \frac{dz^T}{dx} \frac{\partial \epsilon^T}{\partial z} \right) \Big|_{y=\bar{y}} \in \mathbb{R}^{N_a N_s \times N_a N_e}, \quad (49)$$

909 which can be interpreted as showing that developmental feed-  
910 back of states occurs first and then direct niche-constructing  
911 effects by states follow. Similarly, total niche construction by  
912 controls is quantified by the block matrix of *total effects of a mutant's controls on her environment*

$$\begin{aligned} \frac{d\epsilon^T}{dy} \Big|_{y=\bar{y}} &= \left( \frac{dx^T}{dy} \frac{\partial \epsilon^T}{\partial x} + \frac{\partial \epsilon^T}{\partial y} \right) \Big|_{y=\bar{y}} \\ &= \left( \frac{dz^T}{dy} \frac{\partial \epsilon^T}{\partial z} \right) \Big|_{y=\bar{y}} \in \mathbb{R}^{N_a N_c \times N_a N_e}, \end{aligned} \quad (50)$$

914 which depends on niche construction by controls and on total  
915 developmental bias from controls followed by niche construction  
916 by states. The analogous relationship holds for total niche  
917 construction by the phenotype, quantified by the block matrix  
918 of *total effects of a mutant's phenotype on her environment*

$$\frac{d\epsilon^T}{dz} \Big|_{y=\bar{y}} = \left( \frac{dz^T}{dz} \frac{\partial \epsilon^T}{\partial z} \right) \Big|_{y=\bar{y}} \in \mathbb{R}^{N_a(N_s+N_c) \times N_a N_e}, \quad (51)$$

919 which depends on developmental feedback across the pheno-  
920 type and niche construction by the phenotype.

921 Total effects of the environment on itself quantify environ-  
922 mental feedback. The block matrix of *total effects of a mutant's environment on her environment* is

$$\frac{d\epsilon^T}{d\epsilon} \Big|_{y=\bar{y}} = \left( \frac{\partial \epsilon^T}{\partial \epsilon} + \frac{dx^T}{d\epsilon} \frac{\partial \epsilon^T}{\partial x} \right) \Big|_{y=\bar{y}} \in \mathbb{R}^{N_a N_e \times N_a N_e}, \quad (52)$$

924 measuring *environmental feedback*, which includes mutual envi-  
925 ronmental dependence plus total plasticity followed by niche  
926 construction by states.

927 We can use some of the previous total-effect matrices to con-  
928 struct the following total-effect matrices. The block matrix of  
929 *total effects of a mutant's states on her phenotype* is

$$\begin{aligned} \frac{dz^T}{dx} \Big|_{y=\bar{y}} &\equiv \left( \frac{dx^T}{dx} \frac{dy^T}{dx} \right) \Big|_{y=\bar{y}} \\ &= \left( \frac{dx^T}{dx} \quad \mathbf{0} \right) \Big|_{y=\bar{y}} \in \mathbb{R}^{N_a N_s \times N_a(N_s+N_c)}, \end{aligned} \quad (53)$$

930 measuring total developmental bias from states on the pheno-  
931 type. The block matrix of *total effects of controls on her phenotype*  
932 is

$$\begin{aligned} \frac{dz^T}{dy} \Big|_{y=\bar{y}} &\equiv \left( \frac{dx^T}{dy} \frac{dy^T}{dy} \right) \Big|_{y=\bar{y}} \\ &= \left( \frac{dx^T}{dy} \quad \mathbf{I} \right) \Big|_{y=\bar{y}} \in \mathbb{R}^{N_a N_c \times N_a(N_s+N_c)}, \end{aligned} \quad (54)$$

933 measuring total developmental bias from controls on the pheno-  
934 type. When we later consider additive genetic covariances, it  
935 will be important that this matrix  $dz^T/dy$  is singular since it has  
936 fewer rows than columns (Horn and Johnson 2013, p. 14).

937 The block matrix of *total effects of a mutant's phenotype on her phenotype* is

$$\frac{dz^T}{dz} \Big|_{y=\bar{y}} \equiv \left( \frac{dx^T}{dx} \quad \frac{dy^T}{dx} \right) \Big|_{y=\bar{y}} = \left( \frac{dx^T}{dx} \quad \mathbf{0} \right) \Big|_{y=\bar{y}} \quad (55)$$

$$\in \mathbb{R}^{N_a(N_s+N_c) \times N_a(N_s+N_c)},$$

939 which can be interpreted as measuring developmental feedback  
940 across the phenotype. Since  $dz^T/dz|_{y=\bar{y}}$  is square and block  
941 lower triangular, and since  $dx^T/dx|_{y=\bar{y}}$  is non-singular (Ap-  
942 pendix 4, Eq. A32), we have that  $dz^T/dz|_{y=\bar{y}}$  is non-singular.

943 The block matrix of *total effects of a mutant's states on her*  
944 *metaphenotype* is

$$\begin{aligned} \frac{dm^T}{dx} \Big|_{y=\bar{y}} &\equiv \left( \begin{array}{ccc} dx^T & dy^T & d\epsilon^T \\ dx & dx & dx \end{array} \right) \Big|_{y=\bar{y}} \\ &= \left( \begin{array}{ccc} dx^T & 0 & d\epsilon^T \\ dx & & dx \end{array} \right) \Big|_{y=\bar{y}} \\ &\in \mathbb{R}^{N_a N_s \times N_a(N_s+N_c+N_e)}, \end{aligned} \quad (56)$$

945 measuring total developmental bias from states on the metaphen-  
946 otype. The block matrix of *total effects of a mutant's controls on*  
947 *her metaphenotype* is

$$\begin{aligned} \frac{dm^T}{dy} \Big|_{y=\bar{y}} &\equiv \left( \begin{array}{ccc} dx^T & dy^T & d\epsilon^T \\ dy & dy & dy \end{array} \right) \Big|_{y=\bar{y}} \\ &= \left( \begin{array}{ccc} dx^T & I & d\epsilon^T \\ dy & & dy \end{array} \right) \Big|_{y=\bar{y}} \\ &\in \mathbb{R}^{N_a N_c \times N_a(N_s+N_c+N_e)}, \end{aligned} \quad (57)$$

948 measuring total developmental bias from controls on the  
949 metaphenotype, and which is singular because it has fewer rows  
950 than columns.

951 The block matrix of *total effects of a mutant's environment on her*  
952 *metaphenotype* is

$$\begin{aligned} \frac{dm^T}{d\epsilon} \Big|_{y=\bar{y}} &= \left( \begin{array}{ccc} dx^T & dy^T & d\epsilon^T \\ d\epsilon & d\epsilon & d\epsilon \end{array} \right) \Big|_{y=\bar{y}} \\ &= \left( \begin{array}{ccc} dx^T & 0 & d\epsilon^T \\ d\epsilon & & d\epsilon \end{array} \right) \Big|_{y=\bar{y}} \\ &\in \mathbb{R}^{N_a N_e \times N_a(N_s+N_c+N_e)}, \end{aligned} \quad (58)$$

953 measuring total plasticity of the metaphenotype. The block  
954 matrix of *total effects of a mutant's phenotype on her metaphenotype*  
955 *is*

$$\begin{aligned} \frac{dm^T}{dz} \Big|_{y=\bar{y}} &\equiv \left( \begin{array}{c} \frac{dm^T}{dx} \\ \frac{dm^T}{dy} \end{array} \right) \Big|_{y=\bar{y}} = \left( \begin{array}{ccc} dx^T & 0 & d\epsilon^T \\ dx & & dx \\ dy & I & dy \end{array} \right) \Big|_{y=\bar{y}} \\ &\in \mathbb{R}^{N_a(N_s+N_c) \times N_a(N_s+N_c+N_e)}, \end{aligned} \quad (59)$$

956 measuring total developmental bias from the phenotype on the  
957 metaphenotype. The block matrix of *total effects of a mutant's*  
958 *metaphenotype on her metaphenotype* is

$$\begin{aligned} \frac{dm^T}{dm} \Big|_{y=\bar{y}} &= \left( \begin{array}{c} \frac{dm^T}{dx} \\ \frac{dm^T}{dy} \\ \frac{dm^T}{d\epsilon} \end{array} \right) \Big|_{y=\bar{y}} = \left( \begin{array}{ccc} dx^T & 0 & d\epsilon^T \\ dx & & dx \\ dy & I & dy \\ d\epsilon & 0 & d\epsilon \end{array} \right) \Big|_{y=\bar{y}} \\ &\in \mathbb{R}^{N_a(N_s+N_c+N_e) \times N_a(N_s+N_c+N_e)}, \end{aligned} \quad (60)$$

959 measuring developmental feedback across the metaphenotype,  
960 and which we show is non-singular (Appendix 12).

We will see that the evolutionary dynamics of developed  
traits depends on a matrix measuring “inclusive” total develop-  
mental bias. This matrix is the transpose of the matrix of *total*  
*social effects of a focal individual's controls or states on hers and a*  
*partner's states*

$$\frac{d(x+\check{x})}{d\zeta^T} \Big|_{y=\bar{y}} = \left( \frac{dx}{d\zeta^T} + \frac{d\check{x}}{d\zeta^T} \right) \Big|_{y=\bar{y}}, \quad (61)$$

for  $\zeta \in \{x, y\}$  where we denote by  $\check{x}$  the states that a resident  
develops in the context of mutants (a donor perspective for the  
mutant). Thus, this matrix can be interpreted as measuring inclu-  
sive total developmental bias. Note that the second term on  
the right-hand side of Eq. (61) is the total effects of social part-  
ners' states or controls on a focal mutant (a recipient perspective  
for the mutant). Thus, inclusive total developmental bias can  
be equivalently interpreted either from a donor or a recipient  
perspective.

Having written expressions for the above total-effect matrices,  
we can now write the total selection gradients, which measure  
directional selection considering both developmental and envi-  
ronmental constraints. In Appendices 4-8, we show that the  
total selection gradient of vector  $\zeta \in \{x, y, z, \epsilon, m\}$  is

$$\frac{dw}{d\zeta} \Big|_{y=\bar{y}} = \left( \frac{dm^T}{d\zeta} \frac{\partial w}{\partial m} \right) \Big|_{y=\bar{y}}, \quad (62)$$

which has the form of the chain rule in matrix notation. Hence,  
the total selection gradient of  $\zeta$  depends on directional selec-  
tion on the metaphenotype and the total effects of  $\zeta$  on the  
metaphenotype. Consequently, the total selection gradient of  
 $\zeta$  measures total selection on  $\zeta$ , which is directional selection  
on the metaphenotype transformed by the total effects of  $\zeta$  on  
the metaphenotype considering developmental and environ-  
mental constraints. Total selection gradients closely correspond  
to Morrissey's (2014, 2015) notion of extended selection gradi-  
ent (denoted by him as  $\eta$ ). Total selection gradients take the  
following particular forms.

The total selection gradient of states is

$$\begin{aligned} \frac{dw}{dx} \Big|_{y=\bar{y}} &= \left( \frac{dx^T}{dx} \frac{\partial w}{\partial x} + \frac{d\epsilon^T}{dx} \frac{\partial w}{\partial \epsilon} \right) \Big|_{y=\bar{y}} \\ &= \left( \frac{dx^T}{dx} \frac{\partial w}{\partial x} \right) \Big|_{y=\bar{y}} \\ &= \left( \frac{dz^T}{dx} \frac{\partial w}{\partial z} \right) \Big|_{y=\bar{y}} \\ &= \left( \frac{dm^T}{dx} \frac{\partial w}{\partial m} \right) \Big|_{y=\bar{y}}. \end{aligned} \quad (63)$$

This gradient depends on directional selection on states (Eq. 30)  
and directional selection on the environment (Eq. 32). It also  
depends on developmental feedback (Eq. 44) and total niche  
construction by states, which also depends on developmental  
feedback (Eq. 49). Consequently, the total selection gradient of  
states can be interpreted as measuring total selection on devel-  
oped traits in the fitness landscape modified by developmental  
feedback and by the interaction of total niche construction and  
environmental sensitivity of selection.

The total selection gradient of controls is

$$\frac{dw}{dy} \Big|_{y=\bar{y}} = \left( \frac{dx^T}{dy} \frac{\partial w}{\partial x} + \frac{\partial w}{\partial y} + \frac{d\epsilon^T}{dy} \frac{\partial w}{\partial \epsilon} \right) \Big|_{y=\bar{y}} \quad (64)$$

$$\begin{aligned}
 &= \left( \frac{dx^T}{dy} \frac{\delta w}{\delta x} + \frac{\delta w}{\delta y} \right) \Big|_{y=\bar{y}} \\
 &= \left( \frac{dz^T}{dy} \frac{\delta w}{\delta z} \right) \Big|_{y=\bar{y}} \\
 &= \left( \frac{dm^T}{dy} \frac{\partial w}{\partial m} \right) \Big|_{y=\bar{y}} \\
 &= \left( \frac{\delta x^T}{\delta y} \frac{dw}{dx} + \frac{\delta w}{\delta y} \right) \Big|_{y=\bar{y}}.
 \end{aligned}$$

This gradient not only depends on directional selection on states and the environment, but also on directional selection on controls (Eq. 31). It also depends on Wagner's (1984, 1989) developmental matrix (Eq. 45) and on total niche construction by controls, which also depends on the developmental matrix (Eq. 50). Consequently, the total selection gradient of controls can be interpreted as measuring total genetic selection in a fitness landscape modified by the interaction of total developmental bias from controls and directional selection on developed traits and by the interaction of total niche construction by controls and environmental sensitivity of selection.

To derive equations describing the evolutionary dynamics of the metaphenotype, we make use of the total selection gradient of the environment, although such gradient is not necessary to obtain equations describing the evolutionary dynamics of the phenotype. The total selection gradient of the environment is

$$\begin{aligned}
 \frac{dw}{d\epsilon} \Big|_{y=\bar{y}} &= \left( \frac{dx^T}{d\epsilon} \frac{\partial w}{\partial x} + \frac{d\epsilon^T}{d\epsilon} \frac{\partial w}{\partial \epsilon} \right) \Big|_{y=\bar{y}} \\
 &= \left( \frac{dx^T}{d\epsilon} \frac{\delta w}{\delta x} + \frac{\delta w}{\delta \epsilon} \right) \Big|_{y=\bar{y}} \\
 &= \left( \frac{dm^T}{d\epsilon} \frac{\partial w}{\partial m} \right) \Big|_{y=\bar{y}} \\
 &= \left( \frac{\delta x^T}{\delta \epsilon} \frac{dw}{dx} + \frac{\delta w}{\delta \epsilon} \right) \Big|_{y=\bar{y}}.
 \end{aligned} \tag{65}$$

This gradient depends on total plasticity and on environmental feedback, which in turn depends on total plasticity and niche construction by states (Eq. 52). Consequently, the total selection gradient of the environment can be understood as measuring total selection on the environment in a fitness landscape modified by environmental feedback and by the interaction of total plasticity and directional selection on developed traits.

We can combine our expressions for the total selection gradients of states ( $x$ ) and controls ( $y$ ) into the total selection gradient of the phenotype ( $z = (x; y)$ ). The total selection gradient of the phenotype is

$$\begin{aligned}
 \frac{dw}{dz} \Big|_{y=\bar{y}} &= \left( \frac{dz^T}{dz} \frac{\partial w}{\partial z} + \frac{d\epsilon^T}{dz} \frac{\partial w}{\partial \epsilon} \right) \Big|_{y=\bar{y}} \\
 &= \left( \frac{dz^T}{dz} \frac{\delta w}{\delta z} \right) \Big|_{y=\bar{y}} \\
 &= \left( \frac{dm^T}{dz} \frac{\partial w}{\partial m} \right) \Big|_{y=\bar{y}}.
 \end{aligned} \tag{66}$$

Thus, the total selection gradient of the phenotype can be interpreted as measuring total phenotypic selection in a fitness landscape modified by developmental feedback across the phenotype and by the interaction of total niche construction by the

phenotype and environmental sensitivity of selection. In turn, the total selection gradient of the metaphenotype is

$$\frac{dw}{dm} \Big|_{y=\bar{y}} = \left( \frac{dm^T}{dm} \frac{\partial w}{\partial m} \right) \Big|_{y=\bar{y}}, \tag{67}$$

which can be interpreted as measuring total metaphenotypic selection in a fitness landscape modified by developmental feedback across the metaphenotype.

### Layer 5: stabilized effects

We now move on to obtain equations for the next layer of the evo-devo process, that of stabilized-effect matrices. Stabilized-effect matrices measure the total effects of a variable on another one considering both developmental and environmental constraints, now after the effects of social development have stabilized in the population. Stabilized-effect matrices arise in the derivation of the evolutionary dynamics of states and environment as a result of social development. If development is not social (i.e.,  $dx^T/dz|_{y=\bar{y}} = 0$ ), then all stabilized-effect matrices ( $s\zeta^T/s\zeta|_{y=\bar{y}}$ ) except one ( $sx^T/sx|_{y=\bar{y}}$ ) reduce to corresponding total-effect matrices ( $d\zeta^T/d\zeta|_{y=\bar{y}}$ ).

The stabilized effects of a focal individual's states on social partners' states measure social feedback. The transpose of the matrix of *stabilized effects of a focal individual's states on social partners' states* is

$$\begin{aligned}
 \frac{sx}{s\bar{x}^T} \Big|_{y=\bar{y}} &= \left( \mathbf{I} - \frac{d\bar{x}}{dx^T} \Big|_{y=\bar{y}} \right)^{-1} = \left( \mathbf{I} - \frac{dx}{d\bar{x}^T} \Big|_{y=\bar{y}} \right)^{-1} \\
 &= \sum_{\theta=1}^{\infty} \left( \frac{dx}{d\bar{x}^T} \right)^{\theta-1} \Big|_{y=\bar{y}} \in \mathbb{R}^{N_a N_s \times N_a N_s},
 \end{aligned} \tag{68}$$

where the last equality follows by the geometric series of matrices. The matrix  $sx/s\bar{x}^T|_{y=\bar{y}}$  is invertible by our assumption that all eigenvalues of  $dx/d\bar{x}^T|_{y=\bar{y}}$  have absolute value strictly less than one, to guarantee that the resident is socio-devo stable. The matrix  $sx/s\bar{x}^T|_{y=\bar{y}}$  can be interpreted as a collection of total effects of a focal individual's states on social partners' states over socio-devo stabilization (Eq. 4); or vice versa, of social partners' states on a focal individual's states. Thus, the matrix  $sx/s\bar{x}^T|_{y=\bar{y}}$  describes *social feedback* arising from social development. This matrix closely corresponds to an analogous matrix found in the indirect genetic effects literature (Moore et al. 1997, Eq. 19b and subsequent text). If development is not social from states (i.e.,  $dx^T/d\bar{x}|_{y=\bar{y}} = 0$ ), then the matrix  $sx/s\bar{x}^T|_{y=\bar{y}}$  is the identity matrix. This is the only stabilized-effect matrix that does not reduce to the corresponding total-effect matrix when development is not social.

The stabilized effects of a focal individual's states or controls on her states measure stabilized developmental bias. We define the transpose of the matrix of *stabilized effects of a focal individual's states or controls on states* as

$$\frac{sx}{s\bar{\zeta}^T} \Big|_{y=\bar{y}} = \left( \frac{sx}{s\bar{x}^T} \frac{d(x+\bar{x})}{d\bar{\zeta}^T} \right) \Big|_{y=\bar{y}}, \tag{69a}$$

for  $\zeta \in \{x, y\}$ . This matrix can be interpreted as measuring stabilized developmental bias from  $\zeta$ , where a focal individual's controls or states first affect the development of her own and social partners' states which then feedback to affect the individual's states. Stabilized developmental bias is "inclusive" in that it includes both the effects of the focal individual on herself and

1080 on social partners. Note that if development is not social (i.e.,  
1081  $dx^T/d\bar{z}|_{y=\bar{y}} = \mathbf{0}$ ), then a stabilized developmental bias matrix  
1082 ( $sx/s\zeta^T|_{y=\bar{y}}$ ) reduces to the corresponding total developmental  
1083 bias matrix ( $dx/d\zeta^T|_{y=\bar{y}}$ ).

1084 The stabilized effects of the environment on states measure  
1085 stabilized plasticity. The transpose of the matrix of *stabilized*  
1086 *effects of a focal individual's environment on states* is

$$\frac{s\mathbf{x}}{s\boldsymbol{\epsilon}^T}|_{y=\bar{y}} = \left( \frac{s\mathbf{x}}{s\bar{\mathbf{x}}^T} \frac{d\mathbf{x}}{d\boldsymbol{\epsilon}^T} \right) \Big|_{y=\bar{y}} \in \mathbb{R}^{N_a N_s \times N_a N_e}. \quad (69b)$$

1087 This matrix can be interpreted as measuring stabilized plasticity,  
1088 where the environment first causes total plasticity in a focal  
1089 individual and then the focal individual causes stabilized social  
1090 effects on social partners. Stabilized plasticity does not consider  
1091 inclusive effects of the environment. If development is not social  
1092 (i.e.,  $dx^T/d\bar{z}|_{y=\bar{y}} = \mathbf{0}$ ), then stabilized plasticity reduces to total  
1093 plasticity.

1094 The stabilized effects on controls are simple since controls are  
1095 open-loop. The transpose of the matrix of *stabilized effects of a*  
1096 *focal individual's states or environment on controls* is

$$\frac{s\mathbf{y}}{s\zeta^T}|_{y=\bar{y}} = \frac{d\mathbf{y}}{d\zeta^T}|_{y=\bar{y}} = \mathbf{0}, \quad (70a)$$

1097 for  $\zeta \in \{\mathbf{x}, \boldsymbol{\epsilon}\}$  and the transpose of the matrix of *stabilized effects*  
1098 *of a focal individual's controls on controls* is

$$\frac{s\mathbf{y}}{s\mathbf{y}^T}|_{y=\bar{y}} = \frac{d\mathbf{y}}{d\mathbf{y}^T}|_{y=\bar{y}} = \mathbf{I} \in \mathbb{R}^{N_a N_c \times N_a N_c}. \quad (70b)$$

1099 These two equations follow because controls are open-loop.

The stabilized effects of states or controls on the environment  
measure stabilized niche construction. Although the matrix

$$\frac{s\boldsymbol{\epsilon}}{s\mathbf{x}^T}|_{y=\bar{y}}$$

1100 appears in some of the matrices we construct, it is irrelevant as  
1101 it disappears in the matrix products we encounter. The follow-  
1102 ing matrix does not disappear. The transpose of the matrix of  
1103 *stabilized effects of a focal individual's controls on the environment* is

$$\frac{s\boldsymbol{\epsilon}}{s\mathbf{y}^T}|_{y=\bar{y}} = \left( \frac{\partial(\boldsymbol{\epsilon} + \check{\boldsymbol{\epsilon}})}{\partial\bar{\mathbf{z}}^T} \frac{s\mathbf{z}}{s\mathbf{y}^T} \right) \Big|_{y=\bar{y}} \in \mathbb{R}^{N_a N_e \times N_a N_c}, \quad (71a)$$

1104 which is formed by stabilized developmental bias from controls  
1105 on the phenotype followed by inclusive niche construction by  
1106 the phenotype. This matrix can be interpreted as measuring  
1107 stabilized niche construction by controls. Note that if develop-  
1108 ment is not social (i.e.,  $dx^T/d\bar{z}|_{y=\bar{y}} = \mathbf{0}$ ), then stabilized niche  
1109 construction by controls reduces to total niche construction by  
1110 controls (see Eqs. 50 and 39).

1111 The stabilized effects of the environment on itself measure  
1112 stabilized environmental feedback. The transpose of the ma-  
1113 trix of *stabilized effects of a focal individual's environment on the*  
1114 *environment* is

$$\frac{s\boldsymbol{\epsilon}}{s\boldsymbol{\epsilon}^T}|_{y=\bar{y}} = \left( \frac{\partial(\boldsymbol{\epsilon} + \check{\boldsymbol{\epsilon}})}{\partial\bar{\mathbf{z}}^T} \frac{s\mathbf{z}}{s\boldsymbol{\epsilon}^T} + \frac{\partial\boldsymbol{\epsilon}}{\partial\boldsymbol{\epsilon}^T} \right) \Big|_{y=\bar{y}} \in \mathbb{R}^{N_a N_e \times N_a N_e}, \quad (71b)$$

1115 which is formed by stabilized plasticity of the phenotype, fol-  
1116 lowed by inclusive niche construction by the phenotype, plus  
1117 mutual environmental dependence.

1118 The following stabilized-effect matrices are simply collections  
1119 of already defined stabilized-effect matrices. The transpose of

the matrix of *stabilized effects of a focal individual's controls on the*  
phenotype is

$$\frac{s\mathbf{z}}{s\mathbf{y}^T}|_{y=\bar{y}} \equiv \left( \frac{s\mathbf{x}}{s\mathbf{y}^T}; \frac{s\mathbf{y}}{s\mathbf{y}^T} \right) \Big|_{y=\bar{y}} \in \mathbb{R}^{N_a(N_s+N_c) \times N_a N_c}, \quad (72a)$$

measuring stabilized developmental bias from controls on the  
phenotype. The transpose of the matrix of *stabilized effects of a*  
*focal individual's environment on the phenotype* is

$$\frac{s\mathbf{z}}{s\boldsymbol{\epsilon}^T}|_{y=\bar{y}} \equiv \left( \frac{s\mathbf{x}}{s\boldsymbol{\epsilon}^T}; \frac{s\mathbf{y}}{s\boldsymbol{\epsilon}^T} \right) \Big|_{y=\bar{y}} \in \mathbb{R}^{N_a(N_s+N_c) \times N_a N_e}, \quad (72b)$$

measuring stabilized plasticity of the phenotype. The transpose  
of the matrix of *stabilized effects of a focal individual's phenotype on*  
*the phenotype* is

$$\frac{s\mathbf{z}}{s\mathbf{z}^T}|_{y=\bar{y}} \equiv \left( \frac{s\mathbf{x}}{s\mathbf{x}^T} \quad \frac{s\mathbf{x}}{s\mathbf{y}^T} \right) \Big|_{y=\bar{y}} = \left( \frac{s\mathbf{x}}{s\mathbf{x}^T} \quad \frac{s\mathbf{x}}{s\mathbf{y}^T} \right) \Big|_{y=\bar{y}} \quad (73)$$

$$\in \mathbb{R}^{N_a(N_s+N_c) \times N_a(N_s+N_c)},$$

measuring stabilized developmental feedback across the phe-  
notype. The transpose of the matrix of *stabilized effects of a focal*  
*individual's controls on the metaphenotype* is

$$\frac{s\mathbf{m}}{s\mathbf{y}^T}|_{y=\bar{y}} \equiv \left( \frac{s\mathbf{x}}{s\mathbf{y}^T}; \frac{s\mathbf{y}}{s\mathbf{y}^T}; \frac{s\boldsymbol{\epsilon}}{s\mathbf{y}^T} \right) \Big|_{y=\bar{y}} \in \mathbb{R}^{N_a(N_s+N_c+N_e) \times N_a N_c}, \quad (74a)$$

measuring stabilized developmental bias from controls on the  
metaphenotype. The transpose of the matrix of *stabilized effects*  
*of a focal individual's environment on the metaphenotype* is

$$\frac{s\mathbf{m}}{s\boldsymbol{\epsilon}^T}|_{y=\bar{y}} \equiv \left( \frac{s\mathbf{x}}{s\boldsymbol{\epsilon}^T}; \frac{s\mathbf{y}}{s\boldsymbol{\epsilon}^T}; \frac{s\boldsymbol{\epsilon}}{s\boldsymbol{\epsilon}^T} \right) \Big|_{y=\bar{y}} \in \mathbb{R}^{N_a(N_s+N_c+N_e) \times N_a N_e}, \quad (74b)$$

measuring stabilized plasticity of the metaphenotype. Finally,  
the transpose of the matrix of *stabilized effects of a focal individual's*  
*metaphenotype on the metaphenotype* is

$$\frac{s\mathbf{m}}{s\mathbf{m}^T}|_{y=\bar{y}} \equiv \left( \frac{s\mathbf{x}}{s\mathbf{x}^T} \quad \frac{s\mathbf{x}}{s\mathbf{y}^T} \quad \frac{s\mathbf{x}}{s\boldsymbol{\epsilon}^T} \right) \Big|_{y=\bar{y}}$$

$$= \left( \frac{s\mathbf{x}}{s\mathbf{x}^T} \quad \frac{s\mathbf{x}}{s\mathbf{y}^T} \quad \frac{s\mathbf{x}}{s\boldsymbol{\epsilon}^T} \right) \Big|_{y=\bar{y}} \quad (75)$$

$$\in \mathbb{R}^{N_a(N_s+N_c+N_e) \times N_a(N_s+N_c+N_e)},$$

measuring stabilized developmental feedback across the  
metaphenotype.



1139 **Layer 6: genetic covariation**

1140 We now move to the next layer of the evo-devo process, that of  
1141 genetic covariation. To present this layer, we first define breeding  
1142 value under our adaptive dynamics assumptions, which allows  
1143 us to define additive genetic covariance matrices under our as-  
1144 sumptions. Then, we define (socio-devo) stabilized breeding  
1145 value, which generalizes the notion of breeding value to con-  
1146 sider the effects of social development. Using stabilized breeding  
1147 value, we define additive socio-genetic cross-covariance matri-  
1148 ces, which generalize the notion of additive genetic covariance  
1149 to consider the effects of social development.

1150 We follow the standard definition of breeding value to define  
1151 it under our assumptions. The breeding value of a trait is de-  
1152 fined under quantitative genetics assumptions as the best  
1153 linear prediction of the trait from gene content (Lynch and Walsh  
1154 1998; Walsh and Lynch 2018). Specifically, under quantitative  
1155 genetics assumptions, a trait value  $x$  is written as  $x = \sum_i \alpha_i y_i + e$ ,  
1156 where  $y_i$  is the  $i$ -th predictor (gene content in  $i$ -th locus),  $\alpha_i$  is  
1157 the least-square regression coefficient for the  $i$ -th predictor, and  
1158  $e$  is the error; the breeding value of  $x$  is  $a = \sum_i \alpha_i y_i$ . Accordingly,  
1159 we define the breeding value  $\mathbf{a}_\zeta$  of a vector  $\zeta$  as its first-order  
1160 prediction with respect to controls  $\mathbf{y}$  around the resident controls  
1161  $\bar{\mathbf{y}}$ :

$$\mathbf{a}_\zeta \equiv \zeta|_{\mathbf{y}=\bar{\mathbf{y}}} + \left. \frac{d\zeta}{d\mathbf{y}^\top} \right|_{\mathbf{y}=\bar{\mathbf{y}}} (\mathbf{y} - \bar{\mathbf{y}}) = \bar{\zeta} + \left. \frac{d\zeta}{d\mathbf{y}^\top} \right|_{\mathbf{y}=\bar{\mathbf{y}}} (\mathbf{y} - \bar{\mathbf{y}}). \quad (76)$$

1162 With this definition, the entries of  $d\zeta/d\mathbf{y}^\top|_{\mathbf{y}=\bar{\mathbf{y}}}$  correspond to  
1163 Fisher's additive effects of gene content on trait value (his  $\alpha$ ;  
1164 see Eq. I of Fisher 1918 and p. 72 of Lynch and Walsh 1998).  
1165 Moreover, such matrix  $d\zeta/d\mathbf{y}^\top|_{\mathbf{y}=\bar{\mathbf{y}}}$  corresponds to Wagner's  
1166 (1984, 1989) developmental matrix, particularly when  $\zeta = \mathbf{x}$  (his  
1167 **B**; see Eq. 1 of Wagner 1989).

1168 Our definition of breeding value recovers Fisher's (1918) in-  
1169 finitesimal model under certain conditions, although we do not  
1170 need to assume the infinitesimal model. According to Fisher's  
1171 (1918) infinitesimal model, the normalized breeding value excess  
1172 is normally distributed as the number of loci approaches infinity.  
1173 Indeed, for the  $i$ -th entry of  $\mathbf{a}_\zeta$  we have the breeding value excess

$$a_{\zeta_i} - \bar{\zeta}_i = \sum_{k=1}^{N_c} \sum_{a=1}^{N_a} \left. \frac{d\zeta_i}{dy_{ka}} \right|_{\mathbf{y}=\bar{\mathbf{y}}} (y_{ka} - \bar{y}_{ka}).$$

1174 Let us denote the mutational variance for the  $k$ -th control at age  
1175  $a$  by

$$\sigma_{ka}^2 = E[(y_{ka} - \bar{y}_{ka})^2],$$

1176 and let us denote the total mutational variance by

$$s_{N_c N_a}^2 = \sum_{k=1}^{N_c} \sum_{a=1}^{N_a} \sigma_{ka}^2.$$

1177 If the Lyapunov's condition is satisfied, from the Lyapunov  
1178 central limit theorem we have that, as either the number of  
1179 controls  $N_c$  or the number of ages  $N_a$  tends to infinity (e.g., by  
1180 reducing the age bin size), the normalized breeding value excess

$$\frac{1}{s_{N_c N_a}} (a_{\zeta_i} - \bar{\zeta}_i)$$

1181 is normally distributed with mean zero and variance 1. Thus,  
1182 this limit yields the so-called Fisher's (1918) infinitesimal model,

1183 although note we do not need to assume such limit. Conse-  
1184 quently, our framework recovers the infinitesimal model as a  
1185 particular case, when either  $N_c$  or  $N_a$  approaches infinity.

1186 From our definition of breeding value, we have that the breed-  
1187 ing value of controls is simply the controls themselves. From  
1188 Eq. (76), the expected breeding value of vector  $\zeta$  is

$$\bar{\mathbf{a}}_\zeta \equiv E[\mathbf{a}_\zeta] = \bar{\zeta}.$$

1189 In turn, the breeding value of controls  $\mathbf{y}$  is

$$\mathbf{a}_\mathbf{y} = \bar{\mathbf{y}} + \left. \frac{d\mathbf{y}}{d\mathbf{y}^\top} \right|_{\mathbf{y}=\bar{\mathbf{y}}} (\mathbf{y} - \bar{\mathbf{y}}) = \bar{\mathbf{y}} + \mathbf{y} - \bar{\mathbf{y}} = \mathbf{y},$$

1190 since  $d\mathbf{y}/d\mathbf{y}^\top|_{\mathbf{y}=\bar{\mathbf{y}}} = \mathbf{I}$  because, by assumption, controls do not  
1191 have developmental constraints and are open-loop (Layer 4;  
1192 Eq. 48).

1193 We now define additive genetic covariance matrices under  
1194 our assumptions. The additive genetic variance of a trait is  
1195 defined under quantitative genetics assumptions as the variance  
1196 of its breeding value, which is extended to the multivariate case  
1197 so the additive genetic covariance matrix of a set of traits is  
1198 the covariance matrix of the traits' breeding values (Lynch and  
1199 Walsh 1998; Walsh and Lynch 2018). Accordingly, we define the  
1200 additive genetic covariance matrix of a vector  $\zeta \in \mathbb{R}^{m \times 1}$  as the  
1201 covariance matrix of its breeding value:

$$\begin{aligned} \mathbf{G}_\zeta &\equiv \text{cov}[\mathbf{a}_\zeta, \mathbf{a}_\zeta] \\ &= E[(\mathbf{a}_\zeta - \bar{\mathbf{a}}_\zeta)(\mathbf{a}_\zeta - \bar{\mathbf{a}}_\zeta)^\top] = E[(\mathbf{a}_\zeta - \bar{\zeta})(\mathbf{a}_\zeta - \bar{\zeta})^\top] \\ &= E \left[ \left( \left. \frac{d\zeta}{d\mathbf{y}^\top} \right|_{\mathbf{y}=\bar{\mathbf{y}}} (\mathbf{y} - \bar{\mathbf{y}}) \right) \left( \left. \frac{d\zeta}{d\mathbf{y}^\top} \right|_{\mathbf{y}=\bar{\mathbf{y}}} (\mathbf{y} - \bar{\mathbf{y}}) \right)^\top \right] \\ &= E \left[ \left. \frac{d\zeta}{d\mathbf{y}^\top} \right|_{\mathbf{y}=\bar{\mathbf{y}}} (\mathbf{y} - \bar{\mathbf{y}})(\mathbf{y} - \bar{\mathbf{y}})^\top \left. \frac{d\zeta^\top}{d\mathbf{y}} \right|_{\mathbf{y}=\bar{\mathbf{y}}} \right] \\ &= \left. \frac{d\zeta}{d\mathbf{y}^\top} \right|_{\mathbf{y}=\bar{\mathbf{y}}} E[(\mathbf{y} - \bar{\mathbf{y}})(\mathbf{y} - \bar{\mathbf{y}})^\top] \left. \frac{d\zeta^\top}{d\mathbf{y}} \right|_{\mathbf{y}=\bar{\mathbf{y}}} \\ &= \left( \left. \frac{d\zeta}{d\mathbf{y}^\top} \mathbf{G}_\mathbf{y} \frac{d\zeta^\top}{d\mathbf{y}} \right) \right|_{\mathbf{y}=\bar{\mathbf{y}}} \in \mathbb{R}^{m \times m}, \end{aligned} \quad (77)$$

1202 where the fourth line follows from the property of the transpose  
1203 of a product (i.e.,  $(\mathbf{AB})^\top = \mathbf{B}^\top \mathbf{A}^\top$ ) and the last line follows since  
1204 the additive genetic covariance matrix of controls  $\mathbf{y}$  is

$$\mathbf{G}_\mathbf{y} \equiv \text{cov}[\mathbf{a}_\mathbf{y}, \mathbf{a}_\mathbf{y}] = \text{cov}[\mathbf{y}, \mathbf{y}] \in \mathbb{R}^{N_a N_c \times N_a N_c}.$$

1205 Eq. (77) corresponds to previous expressions of the additive  
1206 genetic covariance matrix (see Eq. II of Fisher 1918, Eq. + of  
1207 Wagner 1984, Eq. 3.5b of Barton and Turelli 1987, and Eq. 4.23b  
1208 of Lynch and Walsh 1998; see also Eq. 22a of Lande 1980, Eq. 3  
1209 of Wagner 1989, and Eq. 9 of Charlesworth 1990).

1210 In some cases, Eq. (77) allows one to immediately determine  
1211 whether an additive genetic covariance matrix is singular. In-  
1212 deed, since a matrix with fewer rows than columns is necessarily  
1213 singular (Horn and Johnson 2013, p. 14), and since a well-defined  
1214 product of matrices where the rightmost matrix is singular yields  
1215 a singular matrix, from Eq. (77) it follows that  $\mathbf{G}_\zeta$  is necessarily  
1216 singular if  $\mathbf{y}$  has fewer entries than  $\zeta$  (i.e., if  $N_a N_c < m$ ).

1217 The additive genetic covariance matrix of states takes the  
1218 following form. Evaluating Eq. (77) at  $\zeta = \mathbf{x}$ , the additive genetic  
1219 covariance matrix of states  $\mathbf{x} \in \mathbb{R}^{N_a N_s \times 1}$  is

$$\mathbf{G}_\mathbf{x} = \left( \left. \frac{d\mathbf{x}}{d\mathbf{y}^\top} \mathbf{G}_\mathbf{y} \frac{d\mathbf{x}^\top}{d\mathbf{y}} \right) \right|_{\mathbf{y}=\bar{\mathbf{y}}} \in \mathbb{R}^{N_a N_s \times N_a N_s}, \quad (78)$$

1220 which is singular because the developmental matrix  $\mathbf{dx}^\top/\mathbf{dy}|_{\mathbf{y}=\bar{\mathbf{y}}}$   
 1221 is singular since initial states are not affected by any control and  
 1222 final controls do not affect any state (Appendix 5, Eq. A54). How-  
 1223 ever, evolutionary dynamic equations for states alone having  
 1224 an associated  $\mathbf{G}_x$ -matrix are dynamically insufficient in general.  
 1225 This is because the evolutionary dynamics of states generally  
 1226 depends on the evolutionary dynamics of controls, in particular,  
 1227 because the developmental matrix depends on resident controls  
 1228 in general (Eq. 45; e.g., due to non-linearities in the develop-  
 1229 mental map involving products between controls, or between  
 1230 controls and states, or between controls and environmental vari-  
 1231 ables, that is, gene-gene interaction, gene-phenotype interaction,  
 1232 and gene-environment interaction, respectively). To guarantee  
 1233 dynamic sufficiency, one needs to consider the evolutionary  
 1234 dynamics of both states and controls, that is, of the phenotype,  
 1235 which depends on an associated  $\mathbf{G}_z$ -matrix rather than  $\mathbf{G}_x$  alone.

1236 The additive genetic covariance matrix of the phenotype  
 1237 takes the following form. Evaluating Eq. (77) at  $\zeta = \mathbf{z}$ ,  
 1238 the additive genetic covariance matrix of the phenotype  $\mathbf{z} \in$   
 1239  $\mathbb{R}^{N_a(N_s+N_c) \times 1}$  is

$$\mathbf{G}_z = \left( \frac{d\mathbf{z}}{d\mathbf{y}^\top} \mathbf{G}_y \frac{d\mathbf{z}^\top}{d\mathbf{y}} \right) \Big|_{\mathbf{y}=\bar{\mathbf{y}}} \in \mathbb{R}^{N_a(N_s+N_c) \times N_a(N_s+N_c)}. \quad (79)$$

1240 This matrix is necessarily singular because the phenotype  $\mathbf{z}$   
 1241 includes controls  $\mathbf{y}$  so  $d\mathbf{z}^\top/d\mathbf{y}$  has fewer rows than columns if  
 1242  $N_s > 0$  (i.e.,  $N_a N_c < N_a(N_s + N_c)$ ; Eq. 54). This entails that  $\mathbf{G}_z$   
 1243 has at least  $N_a N_s$  eigenvalues that are exactly zero. That is,  $\mathbf{G}_z$   
 1244 is singular if there is at least one trait that is developmentally  
 1245 constructed according to the developmental map (Eq. 8).

1246 Another way to see the singularity of  $\mathbf{G}_z$  is the following.  
 1247 From Eq. (79), we can write the additive genetic covariance of  
 1248 the phenotype as

$$\mathbf{G}_z = \begin{pmatrix} \mathbf{G}_{zx} & \mathbf{G}_{zy} \end{pmatrix},$$

1249 where the additive genetic cross-covariance matrix of  $\mathbf{z}$  and  $\mathbf{x}$  is

$$\mathbf{G}_{zx} = \left( \frac{d\mathbf{z}}{d\mathbf{y}^\top} \mathbf{G}_y \frac{d\mathbf{x}^\top}{d\mathbf{y}} \right) \Big|_{\mathbf{y}=\bar{\mathbf{y}}} \in \mathbb{R}^{N_a(N_s+N_c) \times N_a N_s},$$

1250 and the additive genetic cross-covariance matrix of  $\mathbf{z}$  and  $\mathbf{y}$  is

$$\mathbf{G}_{zy} = \left( \frac{d\mathbf{z}}{d\mathbf{y}^\top} \mathbf{G}_y \frac{d\mathbf{y}^\top}{d\mathbf{y}} \right) \Big|_{\mathbf{y}=\bar{\mathbf{y}}} \in \mathbb{R}^{N_a(N_s+N_c) \times N_a N_c}.$$

1251 Thus, using Eq. (48), we have that

$$\mathbf{G}_{zx} = \mathbf{G}_{zy} \frac{d\mathbf{x}^\top}{d\mathbf{y}} \Big|_{\mathbf{y}=\bar{\mathbf{y}}}. \quad (80)$$

1252 That is, some columns of  $\mathbf{G}_z$  (i.e., those in  $\mathbf{G}_{zx}$ ) are linear combi-  
 1253 nations of other columns of  $\mathbf{G}_z$  (i.e., those in  $\mathbf{G}_{zy}$ ). Hence,  $\mathbf{G}_z$  is  
 1254 singular.

1255 The additive genetic covariance matrix of the phenotype is  
 1256 singular because the phenotype includes controls (“gene con-  
 1257 tent”). This is because the breeding value of states is a linear  
 1258 combination of the breeding value of controls, by definition of  
 1259 breeding value, regardless of whether states are linear functions  
 1260 of controls and regardless of the number of states or controls.  
 1261 In quantitative genetics terms, this can be understood as the  
 1262  $\mathbf{G}$ -matrix being a function of allele frequencies, say  $\bar{\mathbf{y}}$ , so dy-  
 1263 namic sufficiency requires that allele frequencies are part of the  
 1264 dynamic variables considered; consequently, if the phenotypic

1265 vector  $\bar{\mathbf{z}}$  includes allele frequencies  $\bar{\mathbf{y}}$ , then  $\mathbf{G}$  is necessarily sin-  
 1266 gular since by definition, breeding value under quantitative ge-  
 1267 netics assumptions is a linear combination of gene content. The  
 1268 singularity of  $\mathbf{G}_z$  implies that if there is only one state and one  
 1269 control, with a single age each, then there is a perfect correlation  
 1270 between their breeding values (i.e., their correlation coefficient  
 1271 is 1). This also holds under quantitative genetics assumptions,  
 1272 where the breeding value  $a$  of a trait  $x$  is a linear combination  
 1273 of predictors  $y_i$ , so the additive genetic covariance matrix of  
 1274  $\mathbf{z} = (x; \mathbf{y})$  is singular; in particular, if there is only one predictor  
 1275  $y$ , the breeding value  $a$  and predictor  $y$  are perfectly correlated  
 1276 (i.e.,  $\text{cov}[a, y] / \sqrt{\text{var}[a]\text{var}[y]} = \text{cov}[\alpha y, y] / \sqrt{\text{var}[\alpha y]\text{var}[y]} =$   
 1277  $(\alpha/\alpha)\text{cov}[y, y] / \sqrt{\text{var}[y]\text{var}[y]} = 1$ ). The perfect correlation be-  
 1278 tween breeding value and a single predictor arises because, by  
 1279 definition, breeding value excludes prediction error  $e$ . Note  
 1280 this does not mean that states and controls are linearly related:  
 1281 it is breeding values and controls that are linearly related by  
 1282 definition of breeding value (Eq. 76). A standard approach to  
 1283 remove the singularity of an additive genetic covariance matrix  
 1284 is to remove some traits from the analysis (Lande 1979). To  
 1285 remove the singularity of  $\mathbf{G}_z$  we would need to remove either  
 1286 all states or all controls from the analysis. However, removing  
 1287 states from the analysis prevents study of the evolution of devel-  
 1288 oped traits whereas removing controls from the analysis renders  
 1289 the analysis dynamically insufficient in general because some  
 1290 dynamic variables are not followed. Thus, to guarantee that a  
 1291 dynamically sufficient study of the evolution of developed traits  
 1292 is carried out, we must keep the singularity of  $\mathbf{G}_z$ .

1293 Consider now the following slight generalization of the ad-  
 1294 ditive genetic covariance matrix. We define the additive ge-  
 1295 netic cross-covariance matrix of a vector  $\zeta \in \mathbb{R}^{m \times 1}$  and a vector  
 1296  $\xi \in \mathbb{R}^{p \times 1}$  as the cross-covariance matrix of their breeding value:

$$\mathbf{G}_{\zeta\xi} \equiv \text{cov}[\mathbf{a}_\zeta, \mathbf{a}_\xi] = \left( \frac{d\zeta}{d\mathbf{y}^\top} \mathbf{G}_y \frac{d\xi^\top}{d\mathbf{y}} \right) \Big|_{\mathbf{y}=\bar{\mathbf{y}}} \in \mathbb{R}^{m \times p}. \quad (81)$$

1297 Thus,  $\mathbf{G}_{\zeta\zeta} = \mathbf{G}_\zeta$ . Again, from Eq. (81) it follows that  $\mathbf{G}_{\zeta\xi}$  is  
 1298 necessarily singular if there are fewer entries in  $\mathbf{y}$  than in  $\xi$  (i.e.,  
 1299 if  $N_a N_c < p$ ).

1300 We now use stabilized-effect matrices (Layer 5) to extend  
 1301 the notion of breeding value (Eq. 76). We define the stabilized  
 1302 breeding value of a vector  $\zeta$  as:

$$\mathbf{b}_\zeta \equiv \zeta|_{\mathbf{y}=\bar{\mathbf{y}}} + \frac{s_\zeta}{s\mathbf{y}^\top} \Big|_{\mathbf{y}=\bar{\mathbf{y}}} (\mathbf{y} - \bar{\mathbf{y}}) = \bar{\zeta} + \frac{s_\zeta}{s\mathbf{y}^\top} \Big|_{\mathbf{y}=\bar{\mathbf{y}}} (\mathbf{y} - \bar{\mathbf{y}}). \quad (82)$$

1303 Recall that the stabilized-effect matrix  $s_\zeta/s\mathbf{y}^\top|_{\mathbf{y}=\bar{\mathbf{y}}}$  equals the  
 1304 total-effect matrix  $d\zeta/d\mathbf{y}^\top|_{\mathbf{y}=\bar{\mathbf{y}}}$  if development is non-social.  
 1305 Thus, if development is non-social, the stabilized breeding value  
 1306  $\mathbf{b}_\zeta$  equals the breeding value  $\mathbf{a}_\zeta$ . Also, note that  $E[\mathbf{b}_\zeta] = \bar{\zeta}$ .

1307 We extend the notion of additive genetic covariance matrix  
 1308 to include the effects of socio-devo stabilization as follows. We  
 1309 define the *additive socio-genetic cross-covariance matrix* of  $\zeta \in \mathbb{R}^{m \times 1}$   
 1310 as

$$\mathbf{H}_\zeta \equiv \text{cov}[\mathbf{b}_\zeta, \mathbf{a}_\zeta] = \left( \frac{s_\zeta}{s\mathbf{y}^\top} \mathbf{G}_y \frac{d\zeta^\top}{d\mathbf{y}} \right) \Big|_{\mathbf{y}=\bar{\mathbf{y}}} \in \mathbb{R}^{m \times m}. \quad (83)$$

1311 Thus, if development is non-social,  $\mathbf{H}_\zeta$  equals  $\mathbf{G}_\zeta$ .

1312 Similarly, we generalize this notion and define the *additive*  
 1313 *socio-genetic cross-covariance matrix* of  $\zeta \in \mathbb{R}^{m \times 1}$  and  $\xi \in \mathbb{R}^{p \times 1}$  as

$$\mathbf{H}_{\zeta\xi} \equiv \text{cov}[\mathbf{b}_\zeta, \mathbf{a}_\xi] = \left( \frac{s_\zeta}{s\mathbf{y}^\top} \mathbf{G}_y \frac{d\xi^\top}{d\mathbf{y}} \right) \Big|_{\mathbf{y}=\bar{\mathbf{y}}} \in \mathbb{R}^{m \times p}. \quad (84)$$

1314 Again, if development is non-social,  $\mathbf{H}_{\zeta\zeta}$  equals  $\mathbf{G}_{\zeta\zeta}$ .

1315 Therefore, an additive socio-genetic cross-covariance matrix  
1316  $\mathbf{H}_{\zeta\mathbf{z}}$  is singular if  $\zeta$  has more entries than  $\mathbf{y}$ . Consequently, the  
1317 matrix

$$\mathbf{H}_{\zeta\mathbf{z}} = \left( \frac{s\zeta}{\mathbf{sy}^\top} \mathbf{G}_y \frac{d\mathbf{z}^\top}{d\mathbf{y}} \right) \Big|_{\mathbf{y}=\bar{\mathbf{y}}} \in \mathbb{R}^{m \times N_a(N_s+N_c)} \quad (85)$$

1318 is singular if there is at least one state (i.e., if  $N_s > 0$ ). Moreover,  
1319  $\mathbf{H}_{\zeta\mathbf{z}}$  has at least  $N_a N_s$  eigenvalues that are exactly zero. Now,  
1320 the matrix

$$\mathbf{H}_{\zeta\mathbf{m}} = \left( \frac{s\zeta}{\mathbf{sy}^\top} \mathbf{G}_y \frac{d\mathbf{m}^\top}{d\mathbf{y}} \right) \Big|_{\mathbf{y}=\bar{\mathbf{y}}} \in \mathbb{R}^{m \times (1+N_a)(N_s+N_c+N_e)} \quad (86)$$

1321 is singular if there is at least one state or one environmental  
1322 variable (i.e., if  $N_s > 0$  or  $N_e > 0$ ). Thus,  $\mathbf{H}_{\zeta\mathbf{m}}$  has at least  
1323  $N_a(N_s + N_e)$  eigenvalues that are exactly zero. In contrast, the  
1324 additive socio-genetic cross-covariance matrix of  $\zeta \in \{\mathbf{y}, \mathbf{z}, \mathbf{m}\}$   
1325 and  $\mathbf{y}$

$$\mathbf{H}_{\zeta\mathbf{y}} = \left( \frac{s\zeta}{\mathbf{sy}^\top} \mathbf{G}_y \right) \Big|_{\mathbf{y}=\bar{\mathbf{y}}} \in \mathbb{R}^{m \times N_a N_c} \quad (87)$$

1326 is non-singular if  $\mathbf{G}_y$  is non-singular (Appendices 10 and 12).  
1327 The matrices of additive socio-genetic covariance share various  
1328 properties with similar generalizations of the  $\mathbf{G}$ -matrix arising  
1329 in the indirect genetic effects literature (Kirkpatrick and Lande  
1330 1989; Moore et al. 1997; Townley and Ezard 2013).

### 1331 Layer 7: evolutionary dynamics

1332 Finally, we move to the top layer of the evo-devo process, that of  
1333 evolutionary dynamics. This layer contains equations describing  
1334 the evolutionary dynamics under explicit developmental and  
1335 environmental constraints. In Appendices 1 and 9-12, we show  
1336 that the evolutionary dynamics of states, controls, phenotype,  
1337 environment, and metaphenotype (i.e., for  $\zeta \in \{\mathbf{x}, \mathbf{y}, \mathbf{z}, \boldsymbol{\epsilon}, \mathbf{m}\}$ )  
1338 are given by

$$\frac{d\bar{\zeta}}{d\tau} = \left( \mathbf{H}_{\zeta\mathbf{m}} \frac{\partial w}{\partial \mathbf{m}} + \frac{s\zeta}{\mathbf{se}^\top} \frac{\partial \boldsymbol{\epsilon}}{\partial \tau} \right) \Big|_{\mathbf{y}=\bar{\mathbf{y}}}, \quad (88a)$$

1339 which must satisfy both the developmental constraint

$$\bar{\mathbf{x}}_a + 1 = \mathbf{g}_a(\bar{\mathbf{z}}_a, \bar{\mathbf{z}}, \bar{\boldsymbol{\epsilon}}_a) \text{ for all } a \in \{1, \dots, N_a - 1\} \text{ with fixed } \bar{\mathbf{x}}_1, \quad (88b)$$

1340 and the environmental constraint

$$\bar{\boldsymbol{\epsilon}}_a = \mathbf{h}_a(\bar{\mathbf{z}}_a, \bar{\mathbf{z}}, \tau) \text{ for all } a \in \{1, \dots, N_a\}. \quad (88c)$$

1341 If  $\zeta = \mathbf{z}$  in Eq. (88a), then the equations in layers 2-6 guarantee  
1342 that the developmental constraint is satisfied for all  $\tau > \tau_1$  given  
1343 that it is satisfied at the initial evolutionary time  $\tau_1$ . If  $\zeta = \mathbf{m}$  in  
1344 Eq. (88a), then the equations in layers 2-6 guarantee that both the  
1345 developmental and environmental constraints are satisfied for  
1346 all  $\tau > \tau_1$  given that they are satisfied at the initial evolutionary  
1347 time  $\tau_1$ . Both the developmental and environmental constraints  
1348 can evolve as the phenotype and environment evolve and such  
1349 constraints can involve any family of curves (as long as they are  
1350 differentiable).

1351 Eq. (88a) describes the evolutionary dynamics as consisting  
1352 of selection response and exogenous plastic response. Eq. (88a)  
1353 contains the term

$$\left( \mathbf{H}_{\zeta\mathbf{m}} \frac{\partial w}{\partial \mathbf{m}} \right) \Big|_{\mathbf{y}=\bar{\mathbf{y}}}, \quad (89)$$

1354 which comprises directional selection on the metapheno-  
1355 type ( $\partial w / \partial \mathbf{m} |_{\mathbf{y}=\bar{\mathbf{y}}}$ ) and socio-genetic covariation of  $\zeta$  and the  
1356 metaphenotype ( $\mathbf{H}_{\zeta\mathbf{m}}$ ). Thus, the term in Eq. (89) is the *selection*  
1357 *response* of  $\zeta$  and is a generalization of Lande's (1979) generaliza-  
1358 tion of the univariate breeder's equation (Lush 1937; Walsh and  
1359 Lynch 2018). Additionally, Eq. (88a) contains the term

$$\left( \frac{s\zeta}{\mathbf{se}^\top} \frac{\partial \boldsymbol{\epsilon}}{\partial \tau} \right) \Big|_{\mathbf{y}=\bar{\mathbf{y}}}, \quad (90)$$

1360 which comprises the vector of environmental change due to ex-  
1361 ogenous causes ( $\partial \bar{\boldsymbol{\epsilon}} / \partial \tau$ ) and the matrix of stabilized plasticity  
1362 ( $s\zeta / \mathbf{se}^\top |_{\mathbf{y}=\bar{\mathbf{y}}}$ ). Thus, the term in Eq. (90) is the *exogenous plas-*  
1363 *tic response* of  $\zeta$  and is a generalization of previous equations  
1364 (cf. Eq. A3 of Chevin et al. 2010). Note that the *endogenous* plastic  
1365 response of  $\zeta$  (i.e., the plastic response due to endogenous en-  
1366 vironmental change arising from niche construction) is part of  
1367 both the selection response and the exogenous plastic response  
1368 (Layers 2-6).

1369 Selection response is relatively incompletely described by  
1370 directional selection on the metaphenotype. We saw that the  
1371 matrix  $\mathbf{H}_{\zeta\mathbf{m}}$  is always singular if there is at least one state or  
1372 one environmental variable (Layer 6, Eq. 86). Consequently,  
1373 evolutionary equilibria of  $\zeta$  can invariably occur with persist-  
1374 ent directional selection on the metaphenotype, regardless of  
1375 whether there is exogenous plastic response.

1376 Selection response is also relatively incompletely described by  
1377 semi-total selection on the phenotype. We can rewrite the selec-  
1378 tion response, so the evolutionary dynamics of  $\zeta \in \{\mathbf{x}, \mathbf{y}, \mathbf{z}, \boldsymbol{\epsilon}, \mathbf{m}\}$   
1379 (Eq. 88a) is equivalently given by

$$\frac{d\bar{\zeta}}{d\tau} = \left( \mathbf{H}_{\zeta\mathbf{z}} \frac{\partial w}{\partial \mathbf{z}} + \frac{s\zeta}{\mathbf{se}^\top} \frac{\partial \boldsymbol{\epsilon}}{\partial \tau} \right) \Big|_{\mathbf{y}=\bar{\mathbf{y}}}. \quad (91)$$

1380 This equation now depends on semi-total selection on the phe-  
1381 notype ( $\delta w / \delta \mathbf{z} |_{\mathbf{y}=\bar{\mathbf{y}}}$ ), which measures directional selection on  
1382 the phenotype considering environmental constraints (Lande's  
1383 selection gradient does not consider any constraints on the traits;  
1384 Appendix 16). We saw that the semi-total selection gradient of  
1385 the phenotype can be interpreted as pointing in the direction of  
1386 steepest ascent on the fitness landscape in phenotype space after  
1387 the landscape is modified by the interaction of niche construc-  
1388 tion and environmental sensitivity of selection (Layer 3, Eq. 40).  
1389 We also saw that the matrix  $\mathbf{H}_{\zeta\mathbf{z}}$  is always singular if there is  
1390 at least one state (Layer 6, Eq. 85). Consequently, evolutionary  
1391 equilibria can invariably occur with persistent directional selec-  
1392 tion on the phenotype after niche construction has modified the  
1393 phenotype's fitness landscape, regardless of whether there is  
1394 exogenous plastic response.

1395 In contrast, selection response is relatively completely de-  
1396 scribed by total genetic selection. We can further rewrite selec-  
1397 tion response, so the evolutionary dynamics of  $\zeta \in \{\mathbf{x}, \mathbf{y}, \mathbf{z}, \boldsymbol{\epsilon}, \mathbf{m}\}$   
1398 (Eq. 88a) is equivalently given by

$$\frac{d\bar{\zeta}}{d\tau} = \left( \mathbf{H}_{\zeta\mathbf{y}} \frac{dw}{d\mathbf{y}} + \frac{s\zeta}{\mathbf{se}^\top} \frac{\partial \boldsymbol{\epsilon}}{\partial \tau} \right) \Big|_{\mathbf{y}=\bar{\mathbf{y}}}. \quad (92)$$

1399 This equation now depends on total genetic selection  
1400 ( $dw / d\mathbf{y} |_{\mathbf{y}=\bar{\mathbf{y}}}$ ), which measures directional selection on controls  
1401 considering developmental and environmental constraints. We  
1402 saw that the total selection gradient of controls can be inter-  
1403 preted as pointing in the direction of steepest ascent on the  
1404 fitness landscape in control space after the landscape is modified  
1405 by the interaction of total developmental bias from controls and

directional selection on developed traits and by the interaction of total niche construction by controls and environmental sensitivity of selection (Layer 4, Eq. 64). In contrast to the other arrangements of selection response, in Appendices 10 and 12 we show that  $\mathbf{H}_{\zeta\mathbf{y}}$  is non-singular for all  $\zeta \in \{\mathbf{y}, \mathbf{z}, \mathbf{m}\}$  if  $\mathbf{G}_{\mathbf{y}}$  is non-singular (i.e., if there is mutational variation in all directions of control space). Consequently, evolutionary equilibria of controls, phenotype, or metaphenotype can only occur when total genetic selection vanishes if there is mutational variation in all directions of control space and if exogenous plastic response is absent.

Importantly, although Eq. (88a) and its equivalents describe the evolutionary dynamics of  $\zeta$ , such equations are guaranteed to be dynamically sufficient only for certain  $\zeta$ . Eq. (88a) and its equivalents are dynamically sufficient if  $\zeta$  is the controls, the phenotype, or the metaphenotype, provided that the developmental and environmental constraints are satisfied throughout and the five elementary components of the evo-devo process are known (Layer 1, Fig. 5). In contrast, Eq. (88a) and its equivalents are generally dynamically *insufficient* if  $\zeta$  is the states or the environment, because the evolution of controls is not followed but it generally affects the system.

In particular, the evolutionary dynamics of states are generally dynamically insufficient if considered on their own. Let us temporarily assume that the following four conditions hold: (1) development is non-social ( $\mathbf{dx}^T/\mathbf{dz}|_{\mathbf{y}=\bar{\mathbf{y}}} = \mathbf{0}$ ), and there is (2) no exogenous plastic response of states ( $[(\mathbf{dx}/\mathbf{d}\boldsymbol{\epsilon}^T)(\partial\bar{\boldsymbol{\epsilon}}/\partial\tau)]|_{\mathbf{y}=\bar{\mathbf{y}}} = \mathbf{0}$ ), (3) no semi-total selection on controls ( $\delta w/\delta\mathbf{y}|_{\mathbf{y}=\bar{\mathbf{y}}} = \mathbf{0}$ ), and (4) no niche-constructed effects of states on fitness ( $[(\partial\boldsymbol{\epsilon}^T/\partial\mathbf{x})(\partial w/\partial\boldsymbol{\epsilon})]|_{\mathbf{y}=\bar{\mathbf{y}}} = \mathbf{0}$ ). Then, the evolutionary dynamics of states reduces to

$$\frac{d\bar{\mathbf{x}}}{d\tau} = \mathbf{G}_{\mathbf{x}} \frac{\partial w}{\partial \mathbf{x}} \Big|_{\mathbf{y}=\bar{\mathbf{y}}} \quad (93)$$

This recovers Lande's (1979) equation for states, where the additive genetic covariance matrix of states (Layer 6, Eq. 78) is singular because initial states are not affected by any control and final controls do not affect any state (so  $\mathbf{dx}^T/\mathbf{dy}|_{\mathbf{y}=\bar{\mathbf{y}}}$  has rows and columns that are zero; Appendix 5, Eq. A54). Yet, the evolutionary dynamics of states is not necessarily fully determined by the evolutionary dynamics of states alone because such system depends on resident controls whose evolution must also be followed. In particular, setting  $d\bar{\mathbf{x}}/d\tau = \mathbf{0}$  does not generally imply an evolutionary equilibrium, or evolutionary stasis, but only an evolutionary isocline in states, that is, a transient lack of evolutionary change in states. To guarantee a complete description of the evolutionary dynamics of states, we must consider the evolutionary dynamics of states and controls, that is, the phenotype.

Indeed, the evolutionary dynamics of the phenotype is dynamically sufficient more generally. Let us instead assume that the following three conditions hold: (i) development is non-social ( $\mathbf{dx}^T/\mathbf{dz}|_{\mathbf{y}=\bar{\mathbf{y}}} = \mathbf{0}$ ), and there is (ii) no exogenous plastic response of states ( $[(\mathbf{dx}/\mathbf{d}\boldsymbol{\epsilon}^T)(\partial\bar{\boldsymbol{\epsilon}}/\partial\tau)]|_{\mathbf{y}=\bar{\mathbf{y}}} = \mathbf{0}$ ), and (iii) no niche-constructed effects of the phenotype on fitness ( $[(\partial\boldsymbol{\epsilon}^T/\partial\mathbf{z})(\partial w/\partial\boldsymbol{\epsilon})]|_{\mathbf{y}=\bar{\mathbf{y}}} = \mathbf{0}$ ). Then, the evolutionary dynamics of the phenotype reduces to

$$\frac{d\bar{\mathbf{z}}}{d\tau} = \mathbf{G}_{\mathbf{z}} \frac{\partial w}{\partial \mathbf{z}} \Big|_{\mathbf{y}=\bar{\mathbf{y}}} \quad (94)$$

This recovers Lande's (1979) equation, this time for the phenotype, where the additive genetic covariance matrix of the

phenotype (Layer 6, Eq. 79) is singular because the phenotype  $\mathbf{z}$  includes controls  $\mathbf{y}$  (so  $\mathbf{dz}^T/\mathbf{dy}$  has fewer rows than columns; Layer 4, Eq. 54). That is,  $\mathbf{G}_{\mathbf{z}}$  is singular if there is at least one trait that is developmentally constructed according to the developmental map (Eq. 88b). The evolutionary dynamics of the phenotype is now fully determined by Eq. (94) provided that i-iii hold and that the developmental (Eq. 88b) and environmental (Eq. 88c) constraints are met. In such case, setting  $d\bar{\mathbf{z}}/d\tau = \mathbf{0}$  does imply an evolutionary equilibrium, but this does not imply absence of directional selection on the phenotype (i.e., it is possible that  $\partial w/\partial\mathbf{z}|_{\mathbf{y}=\bar{\mathbf{y}}} \neq \mathbf{0}$ ) since  $\mathbf{G}_{\mathbf{z}}$  is always singular. Due to this singularity, if there is any evolutionary equilibrium, there is an infinite number of them. Kirkpatrick and Lofsvold (1992) showed that if  $\mathbf{G}_{\mathbf{z}}$  is singular and constant, then the evolutionary equilibrium that is achieved depends on the initial conditions. Our results extend the relevance of Kirkpatrick and Lofsvold's (1992) insight by showing that  $\mathbf{G}_{\mathbf{z}}$  is always singular and remains so as it evolves. Moreover, since both the developmental (Eq. 88b) and environmental (Eq. 88c) constraints must be satisfied throughout the evolutionary process, the developmental and environmental constraints determine the admissible evolutionary trajectory and the admissible evolutionary equilibria if mutational variation exists in all directions of control space.

Since selection response is relatively completely described by total genetic selection, further insight can be gained by rearranging Lande's equation for the phenotype (Eq. 94) in terms of total genetic selection. Using the rearrangement in Eq. (92) and making the assumptions i-iii in the previous paragraph, Lande's equation (Eq. 94) becomes

$$\frac{d\bar{\mathbf{z}}}{d\tau} = \mathbf{H}_{\mathbf{zy}} \frac{dw}{d\mathbf{y}} \Big|_{\mathbf{y}=\bar{\mathbf{y}}} \quad (95)$$

Here, if the mutational covariance matrix  $\mathbf{G}_{\mathbf{y}}$  is non-singular, then the matrix  $\mathbf{H}_{\mathbf{zy}}$  is non-singular so evolutionary equilibrium ( $d\bar{\mathbf{z}}/d\tau = \mathbf{0}$ ) implies absence of total genetic selection (i.e.,  $dw/d\mathbf{y}|_{\mathbf{y}=\bar{\mathbf{y}}} = \mathbf{0}$ ). Hence, lack of total genetic selection provides a first-order condition for evolutionary equilibria in the absence of exogenous environmental change and of absolute mutational constraints. Consequently, evolutionary equilibria depend on development and niche construction since total genetic selection depends on Wagner's (1984, 1989) developmental matrix and on total niche construction by controls (Layer 4; Eq. 64). Since  $dw/d\mathbf{y}|_{\mathbf{y}=\bar{\mathbf{y}}} = \mathbf{0}$  has only as many equations as there are controls and since there are not only controls but also states and environmental variables to determine, then  $dw/d\mathbf{y}|_{\mathbf{y}=\bar{\mathbf{y}}} = \mathbf{0}$  provides fewer equations than variables to solve for. Hence, absence of total genetic selection still implies an infinite number of evolutionary equilibria. Again, only the subset of evolutionary equilibria that satisfy the developmental (Eq. 88b) and environmental (Eq. 88c) constraints are admissible, and the number of admissible evolutionary equilibria may be finite. Therefore, admissible evolutionary equilibria have a dual dependence on developmental and environmental constraints: first, by the constraints' influence on total genetic selection and so on evolutionary equilibria; and second, by the constraints' specification of which equilibria are admissible.

Because we assume that mutants arise when residents are at carrying capacity, the analogous statements can be made for the evolutionary dynamics of a resident vector in terms of lifetime reproductive success (Eq. 28). Using the relationship between selection gradients in terms of fitness and of expected lifetime reproductive success (Eqs. 29), the evolutionary dynamics of

1521  $\zeta \in \{\mathbf{x}, \mathbf{y}, \mathbf{z}, \boldsymbol{\epsilon}, \mathbf{m}\}$  (Eq. 88a) are equivalently given by

$$\frac{d\bar{\zeta}}{d\tau} = \left( \frac{1}{T} \mathbf{H}_{\zeta \mathbf{m}} \frac{\partial R_0}{\partial \mathbf{m}} + \frac{s\zeta}{s\boldsymbol{\epsilon}^\top} \frac{\partial \boldsymbol{\epsilon}}{\partial \tau} \right) \Big|_{\mathbf{y}=\bar{\mathbf{y}}} \quad (96a)$$

$$= \left( \frac{1}{T} \mathbf{H}_{\zeta \mathbf{z}} \frac{\delta R_0}{\delta \mathbf{z}} + \frac{s\zeta}{s\boldsymbol{\epsilon}^\top} \frac{\partial \boldsymbol{\epsilon}}{\partial \tau} \right) \Big|_{\mathbf{y}=\bar{\mathbf{y}}} \quad (96b)$$

$$= \left( \frac{1}{T} \mathbf{H}_{\zeta \mathbf{y}} \frac{dR_0}{d\mathbf{y}} + \frac{s\zeta}{s\boldsymbol{\epsilon}^\top} \frac{\partial \boldsymbol{\epsilon}}{\partial \tau} \right) \Big|_{\mathbf{y}=\bar{\mathbf{y}}}. \quad (96c)$$

1522 To close, the evolutionary dynamics of the environment can  
1523 be written in a particular form that is insightful. In Appendix  
1524 11, we show that the evolutionary dynamics of the environment  
1525 is given by

$$\frac{d\bar{\boldsymbol{\epsilon}}}{d\tau} = \left( \frac{\partial(\boldsymbol{\epsilon} + \check{\boldsymbol{\epsilon}})}{\partial \mathbf{z}^\top} \frac{d\bar{\mathbf{z}}}{d\tau} + \frac{\partial \boldsymbol{\epsilon}}{\partial \tau} \right) \Big|_{\mathbf{y}=\bar{\mathbf{y}}}. \quad (97)$$

1526 Thus, the evolutionary change of the environment comprises  
1527 “inclusive” endogenous environmental change and exogenous  
1528 environmental change.

## 1529 Discussion

1530 We have addressed the question of how development affects evolu-  
1531 tion by formulating a mathematical framework that integrates  
1532 explicit developmental dynamics into evolutionary dynamics.  
1533 Previous understanding suggested that development affects evolu-  
1534 tion by inducing genetic covariation and genetic constraints,  
1535 although the nature of such constraints had remained uncertain.  
1536 We have found that development has major evolutionary effects.  
1537 First, the  $\mathbf{G}$ -matrix is singular in phenotype space if controls  
1538 are included in the analysis to achieve dynamic sufficiency, so  
1539 genetic covariation is necessarily absent in some directions of  
1540 phenotype space; that is, there necessarily are absolute genetic  
1541 constraints. Second, since  $\mathbf{G}$  is singular in phenotype space,  
1542 directional selection is insufficient to identify evolutionary equi-  
1543 libria. In contrast, total genetic selection, which depends on  
1544 development, is sufficient to identify evolutionary equilibria if  
1545 there are no absolute mutational constraints and no exogenous  
1546 plastic response. Third, since  $\mathbf{G}$  is singular in phenotype space, if  
1547 there is any evolutionary equilibrium and no exogenous plastic  
1548 response, then there is an infinite number of evolutionary equi-  
1549 libria, and development determines the admissible evolutionary  
1550 trajectory and so the admissible equilibria. We have derived  
1551 a collection of equations that describe the evo-devo dynamics  
1552 with explicit population and environmental dynamics. These  
1553 equations provide a theory of constrained evolutionary dynam-  
1554 ics, where the developmental and environmental constraints  
1555 determine the admissible evolutionary path (Eq. 88).

1556 We find that the  $\mathbf{G}$ -matrix is necessarily singular in pheno-  
1557 type space if at least one trait is developmentally constructed  
1558 according to the developmental map (Eq. 88b). This singular-  
1559 ity arises because the evolution of both genetic and developed  
1560 traits is followed for the evolutionary system to be dynamically  
1561 sufficient in general. In quantitative genetics, the evolution of a  
1562 multivariate phenotype is traditionally followed without simul-  
1563 taneously following allele frequency change (e.g., Lande 1979;  
1564 Wagner 1984; Barton and Turelli 1987; Wagner 1989; Martin 2014;  
1565 Morrissey 2014, 2015; Engen and Sæther 2021). We show that the  
1566  $\mathbf{G}$ -matrix generally depends on resident controls (which play an  
1567 analogous role to that of allele frequencies under quantitative ge-  
1568 netics assumptions). Thus, following the evolution of developed  
1569 traits without simultaneously tracking the evolution of controls

is generally dynamically insufficient. The  $\mathbf{G}$ -matrix generally  
depends on resident controls via both the mutational covariance  
matrix and the developmental matrix. The developmental ma-  
trix depends on resident controls particularly due to gene-gene  
interaction, gene-phenotype interaction, and gene-environment  
interaction (see text below Eq. 78). The analogous dependence  
of  $\mathbf{G}$  on allele frequency should hold under quantitative genetics  
assumptions for the same reasons, thus requiring consideration  
of allele frequency as part of the dynamic variables. If under a  
quantitative genetics framework, allele frequency were consid-  
ered as part of the multivariate phenotype in order to render the  
system dynamically sufficient in general, then the associated  $\mathbf{G}$ -  
matrix would be necessarily singular, with at least as many zero  
eigenvalues as there are traits that are not allele frequency. This  
is because, by definition, breeding values are linear combina-  
tions of gene content; thus, some columns in  $\mathbf{G}$  (the covariances  
between the breeding values of all traits and the breeding values  
of traits that are not gene content,  $\mathbf{G}_{\mathbf{z}\mathbf{x}}$ ) are linear combinations  
of other columns (the covariances between the breeding values  
of all traits and the breeding values of gene content,  $\mathbf{G}_{\mathbf{z}\mathbf{y}}$ ), which  
means that  $\mathbf{G}$  is singular (Eq. 80). Including controls as part of  
the phenotype might seem to trivially enforce singularity of  $\mathbf{G}$ ,  
but such inclusion is needed to guarantee dynamic sufficiency.  
Consequently, lack of selection response in phenotype space gen-  
erally occurs with persistent directional selection in phenotype  
space. The singularity of  $\mathbf{G}$  in phenotype space persists despite  
evolution of the developmental map, regardless of the num-  
ber of controls or states provided there is any state, and in the  
presence of endogenous or exogenous environmental change.  
The singularity remains if states directly depend on controls  
(Eq. 88b) so that there is genetic input fed directly into states,  
although the singularity may disappear if every state at every  
age is exclusively directly genetically encoded: that is, if there  
are no developed traits but only genetic traits (or in a standard  
quantitative genetics framework, if only allele frequency change  
is followed).

Extensive research efforts have been devoted to determin-  
ing the relevance of constraints in adaptive evolution (Arnold  
1992; Hine and Blows 2006; Hansen and Houle 2008; Jones *et al.*  
2014; Hine *et al.* 2014; Engen and Sæther 2021). Empirical re-  
search has found that the smallest eigenvalue of  $\mathbf{G}$  is often close  
to zero (Kirkpatrick and Lofsvold 1992; Hine and Blows 2006;  
McGuigan and Blows 2007). However, Mezey and Houle (2005)  
found a non-singular  $\mathbf{G}$ -matrix for 20 traits in fruit flies; our re-  
sults suggest  $\mathbf{G}$  singularity would still arise in this case if enough  
traits are included so as to guarantee dynamic sufficiency (i.e.,  
if allele frequency change were tracked). Previous theory has  
offered limited predictions as to when the  $\mathbf{G}$ -matrix would be  
singular. These include that more traits render  $\mathbf{G}$  more likely to  
be singular as traits are more likely to be genetically correlated,  
such as in infinite-dimensional traits (Gomulkiewicz and Kirk-  
patrick 1992; Kirkpatrick and Lofsvold 1992). But as noted by  
Kirkpatrick and Lofsvold (1992, p. 959), “The small number of  
evolutionary degrees of freedom found in the mouse population  
is a strictly empirical finding not predicted by [previous] theory.”  
Our results are in line with those of Kirkpatrick and Lofsvold  
(1992, p. 962 onwards) who showed that, assuming that  $\mathbf{G}$  is  
singular and constant, then the evolutionary trajectory and equi-  
libria depend on the initial conditions. Our results substantiate  
Kirkpatrick and Lofsvold’s (1992) assumption of singular  $\mathbf{G}$  by  
our point that  $\mathbf{G}$  is always singular in phenotype space, even  
with few traits and evolving  $\mathbf{G}$ . Our results extend Kirkpatrick

and Lofsvold's (1992) insight that the evolutionary trajectory and equilibria depend on the initial conditions by our observation that the evolutionary trajectory and equilibria depend on development. In Appendix 17, we show that such evolutionary trajectory corresponds to a "genetic line of least resistance" (a line parallel to a leading eigenvector of  $\mathbf{G}$ ) (Schluter 1996) if there is a single control and a single age (this may hold for an arbitrary number of controls and ages but we do not prove it). In this case of a single control and single age, developmental constraints can then be interpreted as determining genetic lines of least resistance, the number of which is infinite, and as determining the admissible one along which evolution proceeds.

Multiple mathematical models have addressed the question of the singularity of  $\mathbf{G}$ . Recently, simulation work studying the effect of pleiotropy on the structure of the  $\mathbf{G}$ -matrix found that the smallest eigenvalue of  $\mathbf{G}$  is very small but positive (Engen and Sæther 2021, Tables 3 and 5). Our findings indicate that this model and others (e.g., Wagner 1984; Barton and Turelli 1987; Wagner 1989; Martin 2014; Morrissey 2014, 2015) would recover  $\mathbf{G}$ -singularity by considering allele frequency as part of the phenotype. Other recent simulation work found that a singular  $\mathbf{G}$ -matrix arising from few segregating alleles still allows the population to reach fitness optima as all directions of phenotype space are eventually available in the long run (Barton 2017, Fig. 3). Our results indicate that such a model would recover that unconstrained fitness optima in phenotype space are not necessarily achieved by incorporating developmental constraints, which induce convergence to constrained fitness optima. Convergence to constrained fitness optima rather than to unconstrained fitness optima still occurs with the fewest number of traits allowed in our framework: two, that is, one control and one state with one age each (or in a standard quantitative genetics framework, allele frequency at a locus and one quantitative trait that is a function of such allele frequency). Such constrained adaptation has substantial implications (see e.g., Kirkpatrick and Lofsvold 1992; Gomulkiewicz and Kirkpatrick 1992) and is consistent with empirical observations of lack of selection response in the wild despite selection and genetic variation (Merilä *et al.* 2001; Hansen and Houle 2004; Pujol *et al.* 2018), and of relative lack of stabilizing selection (Kingsolver *et al.* 2001; Kingsolver and Diamond 2011).

Our results provide a mechanistic theory of breeding value, thus allowing for insight regarding the structure and evolution of the  $\mathbf{G}$ -matrix. We have obtained  $\mathbf{G}$ -matrices in terms of total-effect matrices, in accordance with previous results (Fisher 1918; Wagner 1984; Barton and Turelli 1987; Lynch and Walsh 1998; Martin 2014; Morrissey 2014). Total-effect matrices correspond to Wagner's (1984, 1989) developmental matrix (denoted by him as  $\mathbf{B}$ ). Wagner (1984, 1989) constructed and analysed evolutionary models considering developmental maps, and wrote the  $\mathbf{G}$ -matrix in terms of his developmental matrix to assess its impact on the maintenance of genetic variation. Yet, as is traditionally done, Wagner (1984, 1988, 1989) did not simultaneously track the evolution of what we call controls and states, so he did not conclude that the associated  $\mathbf{G}$ -matrix is necessarily singular or that the developmental matrix affects evolutionary equilibria. Wagner's (1984, 1989) models have been used to devise models of constrained adaptation in a fitness landscape, borrowing ideas from computer science (Altenberg 1995, his Fig. 2). This and other models (Houle 1991, his Fig. 2 and Kirkpatrick and Lofsvold 1992, their Fig. 5) have suggested how constrained evolutionary dynamics could proceed although they have lacked

a mechanistic theory of breeding value and thus of  $\mathbf{G}$  and its evolutionary dynamics. Other models borrowing ideas from computer science have found that epistasis can cause the evolutionary dynamics to take an exponentially long time to reach fitness peaks (Kaznatcheev 2019). We obtain equations allowing one to mechanistically construct breeding value and the  $\mathbf{G}$ -matrix from low-level mechanistic components, providing a mechanistic theory of breeding value and opening the door to further insight regarding the structure and evolution of  $\mathbf{G}$ . Our point that the  $\mathbf{G}$ -matrix in phenotype space has at least  $N_a N_s$  eigenvalues that are exactly zero entails that even if there were infinite time, the population does not necessarily reach a fitness peak in phenotype space, although it may in control space.

We find that total genetic selection can provide more information than directional selection regarding selection response. As the  $\mathbf{G}$ -matrix is singular in phenotype space, directional selection on the phenotype is insufficient to identify evolutionary equilibria as has been previously realized (Lande 1979; Via and Lande 1985; Kirkpatrick and Lofsvold 1992; Gomulkiewicz and Kirkpatrick 1992). Evolutionary analysis with singular  $\mathbf{G}$ , including identification of evolutionary equilibria, has been hampered by the lack of mechanistic theory for breeding value and thus of  $\mathbf{G}$  (Via and Lande 1985; Kirkpatrick and Lofsvold 1992; Gomulkiewicz and Kirkpatrick 1992). Our results show that evolutionary analysis despite singular  $\mathbf{G}$  is facilitated by considering total genetic selection, revealing that evolutionary equilibria depend on development rather than exclusively on (unconstrained) selection. Additionally, development determines the admissible evolutionary trajectory along which developmental and environmental constraints are satisfied. These findings indicate that development has a major evolutionary role.

Total genetic selection is measured by a total selection gradient, and total selection gradients closely correspond to Morrissey's (2014, 2015) notion of extended selection gradient. Total selection gradients measure directional selection taking into account developmental and environmental constraints, as opposed to Lande's (1979) selection gradients which measure directional selection without considering constraints. We obtained compact expressions for total selection gradients as linear transformations of Lande's selection gradients, arising from the chain rule in matrix notation (Eq. 62). Morrissey (2014) defined the extended selection gradient as  $\boldsymbol{\eta} = \boldsymbol{\Phi}\boldsymbol{\beta}$ , where  $\boldsymbol{\beta}$  is Lande's selection gradient and  $\boldsymbol{\Phi}$  is the matrix of total effects of all traits on themselves. Morrissey (2014) provided an equation for  $\boldsymbol{\Phi}$  (his Eq. 2), which has the form of our matrix describing developmental feedback among states ( $\text{d}\mathbf{x}^T/\text{d}\mathbf{x}|_{\mathbf{y}=\bar{\mathbf{y}}}$ ; Eq. 44). Thus, interpreting  $\boldsymbol{\Phi}$  as our  $\text{d}\mathbf{x}^T/\text{d}\mathbf{x}|_{\mathbf{y}=\bar{\mathbf{y}}}$  and  $\boldsymbol{\beta}$  as our  $\partial w/\partial \mathbf{x}|_{\mathbf{y}=\bar{\mathbf{y}}}$ , then Eq. (63) shows that  $\boldsymbol{\eta} = \boldsymbol{\Phi}\boldsymbol{\beta}$  corresponds to the total selection gradient of states  $\text{d}w/\text{d}\mathbf{x}|_{\mathbf{y}=\bar{\mathbf{y}}}$  if there is no niche construction by states (i.e., if  $\partial \boldsymbol{\epsilon}^T/\partial \mathbf{x}|_{\mathbf{y}=\bar{\mathbf{y}}} = \mathbf{0}$ ). The equation for  $\boldsymbol{\Phi}$  provided by Morrissey (2014) (his Eq. 2) does not correspond to the expressions we found for other total-effect matrices (e.g., for  $\text{d}\mathbf{x}^T/\text{d}\mathbf{y}|_{\mathbf{y}=\bar{\mathbf{y}}}$  in Eq. 45,  $\text{d}\mathbf{z}^T/\text{d}\mathbf{z}|_{\mathbf{y}=\bar{\mathbf{y}}}$  in Eq. 55, or  $\text{d}\mathbf{m}^T/\text{d}\mathbf{m}|_{\mathbf{y}=\bar{\mathbf{y}}}$  in Eq. 60). Yet, if we interpret  $\boldsymbol{\Phi}$  as our  $\text{d}\mathbf{z}^T/\text{d}\mathbf{z}|_{\mathbf{y}=\bar{\mathbf{y}}}$  and  $\boldsymbol{\beta}$  as our  $\partial w/\partial \mathbf{z}|_{\mathbf{y}=\bar{\mathbf{y}}}$ , then Eq. (66) shows that  $\boldsymbol{\eta} = \boldsymbol{\Phi}\boldsymbol{\beta}$  corresponds to the total selection gradient of the phenotype  $\text{d}w/\text{d}\mathbf{z}|_{\mathbf{y}=\bar{\mathbf{y}}}$  if there is no niche construction by the phenotype (i.e., if  $\partial \boldsymbol{\epsilon}^T/\partial \mathbf{z}|_{\mathbf{y}=\bar{\mathbf{y}}} = \mathbf{0}$ ). Alternatively, if we interpret  $\boldsymbol{\Phi}$  as our  $\text{d}\mathbf{m}^T/\text{d}\mathbf{m}|_{\mathbf{y}=\bar{\mathbf{y}}}$  and  $\boldsymbol{\beta}$  as our  $\partial w/\partial \mathbf{m}|_{\mathbf{y}=\bar{\mathbf{y}}}$ , then Eq. (67) shows that  $\boldsymbol{\eta} = \boldsymbol{\Phi}\boldsymbol{\beta}$  corresponds to the total selection gradient of the metaphenotype  $\text{d}w/\text{d}\mathbf{m}|_{\mathbf{y}=\bar{\mathbf{y}}}$  regardless of whether there is niche construction by states or the phenotype. We show in Appendices 10 and 12 that selection response can

1756 be written in terms of the total selection gradients of the pheno- 1818  
1757 type  $dw/dz|_{y=\bar{y}}$  and metaphenotype  $dw/dm|_{y=\bar{y}}$ , but such total 1819  
1758 selection gradients are insufficient to predict evolutionary equi- 1820  
1759 libria because they are premultiplied by a singular socio-genetic 1821  
1760 cross-covariance matrix. In a subsequent paper, [Morrissey \(2015\)](#) 1822  
1761 provided a symbolic definition for  $\Phi$  (his Eq. 6) which suggests 1823  
1762 interpreting it as our  $dm^T/dy|_{y=\bar{y}}$  (although he used partial 1824  
1763 derivatives). Thus, interpreting  $\Phi$  as our  $dm^T/dy|_{y=\bar{y}}$  and  $\beta$  as 1825  
1764 our  $\partial w/\partial m|_{y=\bar{y}}$ , then Eq. (62) shows that  $\eta = \Phi\beta$  corresponds 1826  
1765 to the total selection gradient of controls  $dw/dy|_{y=\bar{y}}$ , which we 1827  
1766 have shown can predict evolutionary equilibria. [Morrissey](#) gave 1828  
1767 a different treatment to linear ([Morrissey 2014](#)) and non-linear 1829  
1768 ([Morrissey 2015](#)) (implicit) developmental maps, so in the latter 1830  
1769 case he did not write evolutionary change as a Lande's type 1831  
1770 equation. We obtain equations describing evolutionary change 1832  
1771 involving a Lande's type term despite non-linear developmental 1833  
1772 maps because we linearize invasion fitness by assuming weak 1834  
1773 mutation (Eq. 13) ([Dieckmann and Law 1996](#)).

1774 Our results allow for the modelling of evo-devo dynamics in 1835  
1775 a wide array of settings. First, developmental and environmen- 1836  
1776 tal constraints (Eqs. 88b and 88c) can mechanistically describe 1837  
1777 development, gene-gene interaction, and gene-environment in- 1838  
1778 teraction, while allowing for arbitrary non-linearities and evolu- 1839  
1779 tion of the developmental map (or genotype-phenotype map). 1840  
1780 Many previous approaches have modelled gene-gene interac- 1841  
1781 tion, such as by considering multiplicative gene effects, but 1842  
1782 general frameworks mechanistically linking gene-gene interac- 1843  
1783 tion, gene-environment interaction, developmental dynamics, 1844  
1784 and evolutionary dynamics have previously remained elusive 1845  
1785 ([Rice 1990](#); [Hansen and Wagner 2001](#); [Rice 2002](#); [Hermisson et al. 1846](#)  
1786 2003; [Carter et al. 2005](#)). A historically dominant yet debated 1847  
1787 view is that gene-gene interaction has minor evolutionary ef- 1848  
1788 fects as phenotypic evolution depends on additive rather than 1849  
1789 epistatic effects to a first-order of approximation, so epistasis 1850  
1790 would act by influencing a seemingly effectively non-singular  $G$  1851  
1791 ([Hansen 2013](#); [Nelson et al. 2013](#); [Paixão and Barton 2016](#); [Barton 1852](#)  
1792 2017). Our results show that  $G$  is singular and that evolution- 1853  
1793 ary equilibria depend on development and so on gene-gene 1854  
1794 and gene-environment interaction. Hence, gene-gene and gene- 1855  
1795 environment interaction may have strong and permanent evolu- 1856  
1796 tionary effects (e.g., via developmental feedbacks described by 1857  
1797  $dx^T/dx|_{y=\bar{y}}$ ).

1798 Second, our results allow for the study of the evolution of 1860  
1799 the  $G$ -matrix as an emergent property of the evolution of the 1861  
1800 phenotype and environment (i.e., the metaphenotype) rather 1862  
1801 than treating  $G$  as another dynamic variable as is traditionally 1863  
1802 done ([Bulmer 1971](#); [Lande 1979](#); [Bulmer 1980](#); [Lande 1980](#); [Lande 1864](#)  
1803 and [Arnold 1983](#); [Barton and Turelli 1987](#); [Turelli 1988](#); [Gavrilets 1865](#)  
1804 and [Hastings 1994](#); [Carter et al. 2005](#)). Third, our results allow 1866  
1805 for the study of the effects of developmental bias, biased genetic 1867  
1806 variation, and modularity ([Wagner 1996](#); [Pavlicev et al. 2011](#); 1868  
1807 [Wagner and Zhang 2011](#); [Pavlicev and Wagner 2012](#); [Watson et al. 1869](#)  
1808 2013). Indeed, while we have assumed that mutation is unbiased 1870  
1809 for genetic traits, our equations allow for the developmental map 1871  
1810 to lead to biases in genetic variation for developed traits. This 1872  
1811 may lead to modular effects of mutations, whereby altering a 1873  
1812 control tends to affect some states but not others.

1813 Fourth, our equations allow for the study of the evolutionary 1874  
1814 dynamics of life-history models with dynamic constraints. Life- 1875  
1815 history models with dynamic constraints have previously been 1876  
1816 restricted to evolutionary equilibria (e.g., [González-Forero et al. 1877](#)  
1817 2017; [González-Forero and Gardner 2018](#)). Previous frameworks 1878

of evolutionary dynamics of functioned-valued traits allow for 1818  
the modelling of evolutionary dynamics of traits that vary over 1819  
age or stage, but such frameworks do not generally consider 1820  
dynamic constraints (i.e., they consider the evolution of control 1821  
variables but allow for state variables on a case by case basis at 1822  
most) ([Kirkpatrick and Heckman 1989](#); [Dieckmann et al. 2006](#); 1823  
[Coulson et al. 2010](#); [Parvinen et al. 2013](#); [Metz et al. 2016](#); [Rees 1824](#)  
and [Ellner 2016](#)). Fifth, our framework allows for the modelling 1825  
of the evo-devo dynamics of pattern formation by implementing 1826  
reaction-diffusion equations in discrete space in the developmen- 1827  
tal map (e.g., Eq. 6.1 of [Turing 1952](#); [Tomlin and Axelrod 2007](#)). 1828  
Sixth, our framework also allows for the mechanistic modelling 1829  
of adaptive plasticity, for instance, by implementing reinforce- 1830  
ment learning or supervised learning in the developmental map 1831  
([Sutton and Barto 2018](#); [Paenke et al. 2007](#)). To model evo-devo 1832  
dynamics, it may often be simpler to compute the evolution- 1833  
ary dynamics of controls and the developmental dynamics of 1834  
states, rather than the evolutionary dynamics of the phenotype 1835  
or metaphenotype. In such cases, after solving for the evo-devo 1836  
dynamics, one can then compute the matrices composing the 1837  
evolutionary dynamics of the phenotype and metaphenotype 1838  
to gain a detailed understanding of the evolutionary factors at 1839  
play, including the evolution of the  $G$ -matrix. 1840

By allowing development to be social, our framework allows 1841  
for a mechanistic description of extra-genetic inheritance and 1842  
indirect genetic effects. Extra-genetic inheritance can be described 1843  
since the states at a given age can be an identical or modified 1844  
copy of the states of social partners. Thus, social development 1845  
allows for the modelling of social learning ([Sutton and Barto 1846](#)  
2018; [Paenke et al. 2007](#)) and epigenetic inheritance ([Jablonka 1847](#)  
[et al. 1992](#); [Slatkin 2009](#); [Day and Bonduriansky 2011](#)). However, 1848  
we have only considered social interactions among non-relatives, 1849  
so our framework at present only allows for social learning or 1850  
epigenetic inheritance from non-relatives. Additionally, indi- 1851  
rect genetic effects, where genes partly or completely causing 1852  
a phenotype may be located in another individual ([Moore et al. 1853](#)  
1997), can be mechanistically described by social development 1854  
since the controls or states of social partners influence the devel- 1855  
oped phenotype. Indirect genetic effect approaches model the 1856  
phenotype as a linear regression of individual's phenotype on 1857  
social partner's phenotype ([Kirkpatrick and Lande 1989](#); [Moore 1858](#)  
[et al. 1997](#); [Townley and Ezard 2013](#)), whereas our approach con- 1859  
structs individual's phenotype from development depending 1860  
on social partners' phenotypes. We have found that social devel- 1861  
opment generates social feedback (described by  $sx/sx^T|_{y=\bar{y}}$ , 1862  
Eq. 68), which closely though not entirely corresponds to social 1863  
feedback found in the indirect genetic effects literature ([Moore 1864](#)  
[et al. 1997](#), Eq. 19b and subsequent text). The social feedback we 1865  
obtain depends on total social developmental bias from states 1866  
( $dx/dx^T|_{y=\bar{y}}$ , Eq. 47); analogously, social feedback in the indirect 1867  
genetic effects literature depends on the matrix of interaction 1868  
coefficients ( $\Psi$ ) which contains the regression coefficients of 1869  
phenotype on social partner's phenotype. Social development 1870  
leads to a generalization of additive genetic covariance matrices 1871  
 $G = cov[\mathbf{a}, \mathbf{a}]$  into additive socio-genetic cross-covariance ma- 1872  
trices  $H = cov[\mathbf{b}, \mathbf{a}]$ ; similarly, indirect genetic effects involve a 1873  
generalization of the  $G$ -matrix, involving  $C_{az} = cov[\mathbf{a}, \mathbf{z}]$  which 1874  
is the cross-covariance matrix between multivariate breeding 1875  
value and phenotype ([Kirkpatrick and Lande 1989](#); [Moore et al. 1876](#)  
1997; [Townley and Ezard 2013](#)). However, there are differences 1877  
between our results and those in the indirect genetic effects 1878  
literature: for instance, social feedback appears twice in the evo- 1879

lutionary dynamics under indirect genetic effects (see Eqs. 20 and 21 of Moore *et al.* 1997) while it only appears once in our evolutionary dynamics equations through  $sx/s\bar{x}^T|_{y=\bar{y}}$  (Eq. 84); additionally, our  $H$  matrices make the evolutionary dynamics equations depend on total social developmental bias from *controls* ( $dx/d\bar{y}^T|_{y=\bar{y}}$ , Eq. 69a) in a non-feedback manner (specifically, not in an inverse matrix) but this type of dependence does not occur in the evolutionary dynamics under indirect genetic effects (Eqs. 20 and 21 of Moore *et al.* 1997); moreover, “social selection” (i.e.,  $\partial w/\partial \bar{z}$ ) plays no role in our results in principle because we assume there is no kin selection, but social selection plays an important role in the indirect genetic effects literature even if relatedness is zero (McGlothlin *et al.* 2010, e.g., setting  $r = 0$  in their Eq. 10 still leaves an effect of social selection on selection response). This raises the question of whether some of these differences disappear if controls are closed-loop (e.g., if gene expression depends on social partners’ phenotypes).

Our results clarify the role of several developmental factors previously suggested to be evolutionarily important. We have arranged the evo-devo process in a layered structure, where a given layer is formed by components of layers below (Fig. 5). This layered structure helps see that several developmental factors previously suggested to have important evolutionary effects (Laland *et al.* 2014) but with little clear connection (Welch 2017) can be viewed as basic elements of the evolutionary process. Direct-effect matrices (Layer 2) are basic in that they form all the components of the evolutionary dynamics (Layer 7) except mutational variation and exogenous environmental change. Direct-effect matrices quantify (i) directional selection, (ii) developmental bias, (iii) niche construction, (iv) social developmental bias (e.g., extra-genetic inheritance and indirect genetic effects; Moore *et al.* 1997), (v) social niche construction, (vi) environmental sensitivity of selection (Chevin *et al.* 2010), and (vii) phenotypic plasticity. These factors variously affect selection and development, thus affecting evolutionary equilibria and the admissible evolutionary trajectory.

Our approach uses discrete rather than continuous age, which substantially simplifies the mathematics. We recover Lande’s (1979) equation—which slightly differs from Lande’s (1982) age-structured equation—despite having age structure by discretizing age and making use of matrix calculus notation, which allows for compact expressions that incorporate the effects of age structure. This treatment allows for the derivation of analytic expressions for what is otherwise a difficult mathematical challenge if age is continuous (Kirkpatrick and Heckman 1989; Dieckmann *et al.* 2006; Avila *et al.* 2021). For instance, we obtain formulas for the total selection gradient of states (Eq. 63), and in Appendix 13 we show that such gradient is proportional to costate variables (Eq. A96). Costate variables are key in dynamic optimization as used in life-history models (Sydsæter *et al.* 2008), but formulas for costate variables are often unavailable and it can be difficult to interpret how costate variables relate to the evolutionary process. We show that the total selection gradient of states, and so costate variables, affect the evolutionary process by affecting total genetic selection (fifth line of Eq. 64), thus influencing evolutionary equilibria. Although discretization of age may induce numerical imprecision if the continuous age dependence were known (Kirkpatrick and Heckman 1989), precision may be increased by reducing the age bin size (e.g., to represent months or days rather than years; Caswell 2001), potentially at a computational cost.

By simplifying the mathematics, our approach yields insight

that has been otherwise challenging to gain. Life-history models with dynamic constraints generally find that costate variables are non-zero under optimal controls (Gadgil and Bossert 1970; Taylor *et al.* 1974; León 1976; Schaffer 1983; Houston *et al.* 1988; Houston and McNamara 1999; Sydsæter *et al.* 2008). This means that there is persistent total selection on states at evolutionary equilibrium. Our findings clarify that this is to be expected because of the arrow of developmental time, since controls at a given age cannot adjust states at the same age but only at a later age (i.e., the matrix of semi-total effects of controls on states is singular; Eq. A48). Thus, total genetic selection may generally vanish with persistent total selection on states (fifth line of Eq. 64). Moreover, life-history models with explicit developmental constraints have found that their predictions can be substantially different from those found without explicit developmental constraints. In particular, with developmental constraints, the outcome of parent-offspring conflict over sex allocation has been found to be that preferred by the mother (Avila *et al.* 2019), whereas without developmental constraints the outcome has been found to be an intermediate between those preferred by mother and offspring (Reuter and Keller 2001). Our results show that the particular form of the developmental map may induce substantial changes in predictions by influencing total genetic selection and the admissible evolutionary equilibria.

We have obtained a term that we call exogenous plastic response, which is the plastic response to exogenous environmental change over an evolutionary time step (Eq. 90). An analogous term occurs in previous equations (Eq. A3 of Chevin *et al.* 2010). Additionally, *endogenous* plastic response may occur due to niche construction (i.e., endogenous environmental change) and it affects both the selection response and the exogenous plastic response. Exogenous plastic response does not involve change in gene frequency, but it affects the evolutionary dynamics. An immediate evolutionary effect of exogenous plastic response is as follows. At an evolutionary equilibrium where exogenous plastic response is absent, the introduction of exogenous plastic response generally changes socio-genetic covariation or directional selection at a subsequent evolutionary time, thereby inducing selection response. This constitutes a simple form of “plasticity-first” evolution (West-Eberhard 2003), whereby plastic change precedes genetic change, although the plastic change may not be adaptive and the induced genetic change may have a different direction to that of the plastic change.

To conclude, we have formulated a framework that synthesizes developmental and evolutionary dynamics yielding a theory of constrained evolutionary dynamics under age structure. This framework shows that development has major evolutionary effects as it affects both evolutionary equilibria and the admissible evolutionary path. Our results provide a tool to chart major territory on how development affects evolution.

## Acknowledgements

We thank K.N. Laland, R. Lande, L.C. Mikula, A.J. Moore, and M.B. Morrissey for comments on previous versions of the manuscript, and D.M. Shuker for feedback. We thank M.B. Morrissey for discussion and explanation of his work. This work was funded by an ERC Consolidator Grant to AG (grant no. 771387). AG was also funded by a NERC Independent Research Fellowship (grant no. NE/K009524/1).

## Literature Cited

Altenberg, L., 1995 Genome growth and the evolution of the



- 2002 genotype-phenotype map. In *Evolution and biocomputation*,  
2003 edited by W. Banzhaf and F. H. Eeckman, volume 899 of *Lec-*  
2004 *ture Notes in Computer Science*, pp. 205–259, Springer-Verlag.  
2005 Arnold, S. J., 1992 Constraints on phenotypic evolution. *Am.*  
2006 *Nat.* **140**: S85–S107.  
2007 Arnold, S. J., R. Bürger, P. A. Hohenlohe, B. C. Ajie, and A. G.  
2008 Jones, 2008 Understanding the evolution and stability of the  
2009 G-matrix. *Evolution* **62**: 2451–2461.  
2010 Avila, P., L. Fromhage, and L. Lehmann, 2019 Sex-allocation con-  
2011 flict and sexual selection throughout the lifespan of eusocial  
2012 colonies. *Evolution* **73**: 1116–1132.  
2013 Avila, P., T. Priklopil, and L. Lehmann, 2021 Hamilton’s rule,  
2014 gradual evolution, and the optimal (feedback) control of phe-  
2015 notypically plastic traits. *J. Theor. Biol.* p. 110602.  
2016 Baldwin, J. M., 1896 A new factor in evolution. *Am. Nat.* **30**:  
2017 441–451.  
2018 Barton, N. H., 2017 How does epistasis influence the response to  
2019 selection? *Heredity* **118**: 96–109.  
2020 Barton, N. H. and M. Turelli, 1987 Adaptive landscapes, genetic  
2021 distance and the evolution of quantitative characters. *Genet.*  
2022 *Res.* **49**: 157–173.  
2023 Bienvenu, F. and S. Legendre, 2015 A new approach to the gen-  
2024 eration time in matrix population models. *Am. Nat.* **185**: 834–  
2025 843.  
2026 Björklund, M., A. Husby, and L. Gustafsson, 2013 Rapid and  
2027 unpredictable changes of the G-matrix in a natural bird popu-  
2028 lation over 25 years. *J. Evol. Biol.* **26**: 1–13.  
2029 Blows, M. W., 2007 A tale of two matrices: multivariate ap-  
2030 proaches in evolutionary biology. *J. Evol. Biol.* **20**: 1–8.  
2031 Blows, M. W. and A. A. Hoffmann, 2005 A reassessment of  
2032 genetic limits to evolutionary change. *Ecology* **86**: 1371–1384.  
2033 Boyd, R. and P. J. Richerson, 1985 *Culture and the Evolutionary*  
2034 *Process*. The Univ. of Chicago Press, Chicago, IL, USA.  
2035 Bulmer, M., 1994 *Theoretical Evolutionary Ecology*. Sinauer, Sun-  
2036 derland, MA, USA.  
2037 Bulmer, M. G., 1971 The effect of selection on genetic variability.  
2038 *Am. Nat.* **105**: 201–211.  
2039 Bulmer, M. G., 1980 *The Mathematical Theory of Quantitative Ge-*  
2040 *netics*. Oxford Univ. Press, Oxford, UK.  
2041 Carter, A. J. R., J. Hermisson, and T. F. Hansen, 2005 The role  
2042 of epistatic interactions in the response to selection and the  
2043 evolution of evolvability. *Theor. Popul. Biol.* **68**: 179–196.  
2044 Caswell, H., 1978 A general formula for the sensitivity of popu-  
2045 lation growth rate to changes in life history parameters. *Theor.*  
2046 *Popul. Biol.* **14**: 215–230.  
2047 Caswell, H., 2001 *Matrix Population Models*. Sinauer, Sunderland,  
2048 MA, USA, second edition.  
2049 Caswell, H., 2009 Stage, age and individual stochasticity in de-  
2050 mography. *Oikos* **118**: 1763–1782.  
2051 Caswell, H., 2019 *Sensitivity Analysis: Matrix Methods in Demog-*  
2052 *raphy and Ecology*. Springer Open, Cham, Switzerland.  
2053 Caswell, H. and E. Shyu, 2017 4, pp. 56–82 in *Senescence, selection*  
2054 *gradients and mortality*, edited by Shefferson, R. P., O. R. Jones,  
2055 and R. Salguero-Gómez, Cambridge Univ. Press.  
2056 Cavalli-Sforza, L. L. and M. W. Feldman, 1981 *Cultural Trans-*  
2057 *mission and Evolution*. Princeton Univ. Press, Princeton, NJ,  
2058 USA.  
2059 Chantepie, S. and L.-M. Chevin, 2020 How does the strength  
2060 of selection influence genetic correlations? *Evol. Lett.* **4**:  
2061 468–478.  
2062 Charlesworth, B., 1990 Optimization models, quantitative genet-  
2063 ics, and mutation. *Evolution* **44**: 520–538.  
Charlesworth, B., 1993 Natural selection on multivariate traits in  
age-structured populations. *Proc. R. Soc. Lond. B* **251**: 47–52.  
Charlesworth, B., 1994 *Evolution in age-structured populations*.  
Cambridge Univ. Press, second edition.  
Charlesworth, B., R. Lande, and M. Slatkin, 1982 A neo-  
Darwinian commentary on macroevolution. *Evolution* **36**: 474–  
498.  
Cheverud, J. M., 1984 Quantitative genetics and developmental  
constraints on evolution by selection. *J. Theor. Biol.* **110**: 155–  
171.  
Cheverud, J. M., J. J. Rutledge, and W. R. Atchley, 1983 Quanti-  
tative genetics of development: genetic correlations among  
age-specific trait values and the evolution of ontogeny. *Evolu-*  
*tion* **37**: 895–905.  
Chevin, L.-M., R. Lande, and G. M. Mace, 2010 Adaptation,  
plasticity, and extinction in a changing environment: Towards  
a predictive theory. *PLOS Biology* **8**: 1–8.  
Coulson, T., S. Tuljapurkar, and D. Z. Childs, 2010 Using evolu-  
tionary demography to link life history theory, quantitative  
genetics and population ecology. *J. Anim. Ecol.* **79**: 1226–1240.  
Creanza, N. and M. W. Feldman, 2014 Complexity in models  
of cultural niche construction with selection and homophily.  
*Proc. Natl. Acad. Sci. USA* **111**: 10830–10837.  
Creanza, N., L. Fogarty, and M. W. Feldman, 2012 Models of cul-  
tural niche construction with selection and assortative mating.  
*PLOS ONE* **7**: 1–11.  
Crow, J. F. and M. Kimura, 1970 *An Introduction to Population*  
*Genetics Theory*. Blackburn Press, Caldwell, NJ, USA.  
Day, T. and R. Bonduriansky, 2011 A unified approach to the evo-  
lutionary consequences of genetic and nongenetic inheritance.  
*Am. Nat.* **178**: E18–E36.  
de Vries, C. and H. Caswell, 2018 Demography when history  
matters: construction and analysis of second-order matrix  
population models. *Theor. Ecol.* **11**: 129–140.  
de Vries, C. and H. Caswell, 2019 Stage-structured evolutionary  
demography: linking life histories, population genetics, and  
ecological dynamics. *Am. Nat.* **193**: 545–559.  
Dieckmann, U., M. Heino, and K. Parvinen, 2006 The adaptive  
dynamics of function-valued traits. *J. Theor. Biol.* **241**: 370–  
389.  
Dieckmann, U. and R. Law, 1996 The dynamical theory of co-  
evolution: a derivation from stochastic ecological processes. *J.*  
*Math. Biol.* **34**: 579–612.  
Durinx, M., J. A. J. (Hans) Metz, and G. Meszéna, 2008 Adaptive  
dynamics for physiologically structured population models. *J.*  
*Math. Biol.* **56**: 673–742.  
Engen, S. and B.-E. Sæther, 2021 Structure of the G-matrix in  
relation to phenotypic contributions to fitness. *Theor. Popul.*  
*Biol.* **138**: 43–56.  
Falconer, D. S. and T. F. C. Mackay, 1996 *Introduction to Quantita-*  
*tive Genetics*. Pearson Prentice Hall, Harlow, England, fourth  
edition.  
Fisher, R., 1918 XV.—The correlation between relatives on the  
supposition of Mendelian inheritance. *Trans. Roy. Soc. Edinb.*  
**52**: 399–433.  
Fisher, R. A., 1922 XXI.—On the dominance ratio. *Trans. Roy.*  
*Soc. Edinb.* **42**: 321–341.  
Fisher, R. A., 1927 The actuarial treatment of official birth records.  
*Eugen. Rev.* **19**: 103–108.  
Frank, S. A., 2012 Natural selection. IV The Price equation. *J.*  
*Evol. Biol.* **25**: 1002–1019.  
Gadgil, M. and W. H. Bossert, 1970 Life historical consequences

- of natural selection. *Am. Nat.* **104**: 1–24.
- Gavrilets, S. and A. Hastings, 1994 A quantitative-genetic model for selection on developmental noise. *Evolution* **48**: 1478–1486.
- Gimelfarb, A., 1982 Quantitative character dynamics: Gametic model. *Theor. Popul. Biol.* **22**: 324–366.
- Gomulkiewicz, R. and M. Kirkpatrick, 1992 Quantitative genetics and the evolution of reaction norms. *Evolution* **46**: 390–411.
- González-Forero, M., T. Faulwasser, and L. Lehmann, 2017 A model for brain life history evolution. *PLOS Comp. Biol.* **13**: e1005380.
- González-Forero, M. and A. Gardner, 2018 Inference of ecological and social drivers of human brain-size evolution. *Nature* **557**: 554–557.
- Gould, S. J. and R. C. Lewontin, 1979 The spandrels of San Marco and the Panglossian paradigm: a critique of the adaptationist programme. *Proc. R. Soc. Lond. B* **205**: 581–598.
- Hamilton, W. D., 1966 The moulding of senescence by natural selection. *J. Theor. Biol.* **12**: 12–45.
- Hansen, T. F., 2013 Why epistasis is important for selection and adaptation. *Evolution* **67**: 3501–3511.
- Hansen, T. F. and D. Houle, 2004 Evolvability, stabilizing selection, and the problem of stasis. In *Phenotypic integration: studying ecology and evolution of complex phenotypes*, edited by M. Pigliucci and K. Preston, chapter 5, Oxford Univ. Press.
- Hansen, T. F. and D. Houle, 2008 Measuring and comparing evolvability and constraint in multivariate characters. *J. Evol. Biol.* **21**: 1201–1219.
- Hansen, T. F. and G. P. Wagner, 2001 Modeling genetic architecture: a multilinear theory of gene interaction. *Theor. Popul. Biol.* **59**: 61–86.
- Hermisson, J., T. F. Hansen, and G. P. Wagner, 2003 Epistasis in polygenic traits and the evolution of genetic architecture under stabilizing selection. *Am. Nat.* **161**: 708–734.
- Hill, W. G. and R. Thompson, 1978 Probabilities of non-positive definite between-group or genetic covariance matrices. *Biometrics* **34**: 429–439.
- Hine, E. and M. W. Blows, 2006 Determining the effective dimensionality of the genetic variance-covariance matrix. *Genetics* **173**: 1135–1144.
- Hine, E., K. McGuigan, and M. W. Blows, 2014 Evolutionary constraints in high-dimensional traits sets. *Am. Nat.* **184**: 119–131.
- Horn, R. A. and C. R. Johnson, 2013 *Matrix Analysis*. Cambridge Univ. Press, New York, NY, USA, second edition.
- Houle, D., 1991 Genetic covariance of fitness correlates: what genetic correlations are made of and why it matters. *Evolution* **45**: 630–648.
- Houle, D., 2001 Characters as the units of evolutionary change. In *The Character Concept in Evolutionary Biology*, edited by G. P. Wagner, pp. 109–140, Academic Press, San Diego, CA, USA.
- Houston, A., C. Clark, J. McNamara, and M. Mangel, 1988 Dynamic models in behavioural and evolutionary ecology. *Nature* **332**: 29–34.
- Houston, A. I. and J. M. McNamara, 1999 *Models of Adaptive Behaviour: an approach based on state*. Cambridge Univ. Press.
- Jablonka, E., M. Lachmann, and M. J. Lamb, 1992 Evidence, mechanisms and models for the inheritance of acquired characters. *J. Theor. Biol.* **158**: 245–268.
- Jones, A. G., S. J. Arnold, and R. Bürger, 2003 Stability of the G-matrix in a population experiencing pleiotropic mutation, stabilizing selection, and genetic drift. *Evolution* **57**: 1747–1760.
- Jones, A. G., S. J. Arnold, and R. Bürger, 2004 Evolution and stability of the G-matrix on a landscape with a moving optimum. *Evolution* **58**: 1639–1654.
- Jones, A. G., S. J. Arnold, and R. Bürger, 2007 The mutation matrix and the evolution of evolvability. *Evolution* .
- Jones, A. G., R. Bürger, and S. J. Arnold, 2014 Epistasis and natural selection shape the mutational architecture of complex traits. *Nat. Comm.* **5**: 3709.
- Jones, A. G., R. Bürger, S. J. Arnold, P. A. Hohenlohe, and J. C. Uyeda, 2012 The effects of stochastic and episodic movement of the optimum on the evolution of the g-matrix and the response of the trait mean to selection. *J. Evol. Biol.* **5**: 2210–2231.
- Kaznatcheev, A., 2019 Computational complexity as an ultimate constraint on evolution. *Genetics* **212**: 245–265.
- Kingsolver, J. G. and S. E. Diamond, 2011 Phenotypic selection in natural populations: What limits directional selection? *Am. Nat.* **177**: 346–357.
- Kingsolver, J. G., H. E. Hoekstra, J. M. Hoekstra, D. Berrigan, S. N. Vignieri, *et al.*, 2001 The strength of phenotypic selection in natural populations. *Am. Nat.* **157**: 245–261.
- Kirkpatrick, M., 2009 Patterns of quantitative genetic variation in multiple dimensions. *Genetica* **136**: 271–284.
- Kirkpatrick, M. and N. Heckman, 1989 A quantitative genetic model for growth, shape, reaction norms, and other infinite-dimensional characters. *J. Math. Biol.* **27**: 429–450.
- Kirkpatrick, M. and R. Lande, 1989 The evolution of maternal characters. *Evolution* **43**: 485–503.
- Kirkpatrick, M. and D. Lofsvold, 1992 Measuring selection and constraint in the evolution of growth. *Evolution* **46**: 954–971.
- Klingenberg, C. P., 2005 11. Developmental constraints, modules, and evolvability, pp. 219–247 in *Variation*, edited by Hallgrímsson, B. and B. K. Hall, Academic Press.
- Klingenberg, C. P., 2010 Evolution and development of shape: integrating quantitative approaches. *Nat. Rev. Genet.* **11**: 623–635.
- Kobayashi, Y., J. Y. Wakano, and H. Ohtsuki, 2019 Evolution of cumulative culture for niche construction. *J. Theor. Biol.* **472**: 67–76.
- Laland, K., T. Uller, M. Feldman, K. Sterelny, G. B. Müller, *et al.*, 2014 Does evolutionary theory need a rethink? Yes, urgently. *Nature* **514**: 161–164.
- Laland, K. N., F. J. Odling-Smee, and M. W. Feldman, 1996 The evolutionary consequences of niche construction: a theoretical investigation using two-locus theory. *J. Evol. Biol.* **9**: 293–316.
- Laland, K. N., F. J. Odling-Smee, and M. W. Feldman, 1999 Evolutionary consequences of niche construction and their implications for ecology. *Proc. Natl. Acad. Sci. USA* **96**: 10242–10247.
- Laland, K. N., J. Odling-Smee, and M. W. Feldman, 2001 Cultural niche construction and human evolution. *J. Evol. Biol.* **14**: 22–33.
- Laland, K. N., T. Uller, M. W. Feldman, K. Sterelny, G. B. Müller, *et al.*, 2015 The extended evolutionary synthesis: its structure, assumptions and predictions. *Proc. R. Soc. B* **282**: 20151019.
- Lande, R., 1979 Quantitative genetic analysis of multivariate evolution applied to brain: body size allometry. *Evolution* **34**: 402–416.
- Lande, R., 1980 The genetic covariance between characters maintained by pleiotropic mutations. *Genetics* **94**: 203–215.
- Lande, R., 1982 A quantitative genetic theory of life history evolution. *Ecology* **63**: 607–615.
- Lande, R., 2009 Adaptation to an extraordinary environment by

- 2250 evolution of phenotypic plasticity and genetic assimilation. *J.*  
2251 *Evol. Biol.* **22**: 1435–1446. 2312
- 2252 Lande, R., 2014 Evolution of phenotypic plasticity and envi- 2313  
2253 ronmental tolerance of a labile quantitative character in a 2314  
2254 fluctuating environment. *J. Evol. Biol.* **27**: 866–875. 2315
- 2255 Lande, R., 2019 Developmental integration and evolution of 2316  
2256 labile plasticity in a complex quantitative character in a multi- 2317  
2257 periodic environment. *Proc. Natl. Acad. Sci. USA* **116**: 11361– 2318  
2258 11369. 2319
- 2259 Lande, R. and S. J. Arnold, 1983 The measurement of selection 2320  
2260 on correlated characters. *Evolution* **37**: 1210–1226. 2321
- 2261 Lehmann, L., 2007 The evolution of trans-generational altruism: 2322  
2262 kin selection meets niche construction. *J. Evol. Biol.* **20**: 181– 2323  
2263 189. 2324
- 2264 Lehmann, L., 2008 The adaptive dynamics of niche constructing 2325  
2265 traits in spatially subdivided populations: Evolving posthu- 2326  
2266 mous extended phenotypes. *Evolution* **62**: 549–566. 2327
- 2267 León, J. A., 1976 Life histories as adaptive strategies. *J. Theor.*  
2268 *Biol.* **60**: 301–335. 2328
- 2269 Lush, J. L., 1937 *Animal Breeding Plans*. Iowa State Univ. Press,  
2270 Ames, IA, USA. 2329
- 2271 Lynch, M. and B. Walsh, 1998 *Genetics and Analysis of Quantitative*  
2272 *Traits*. Sinauer, Sunderland, MA, USA. 2330
- 2273 Martin, G., 2014 Fisher’s geometrical model emerges as a prop- 2331  
2274 erty of complex integrated phenotypic networks. *Genetics* **197**: 2332  
2275 237–255. 2333
- 2276 Maynard Smith, J., R. Burian, S. Kauffman, P. Alberch, J. Camp- 2334  
2277 bell, *et al.*, 1985 Developmental constraints and evolution. *Q.*  
2278 *Rev. Biol.* . 2335
- 2279 McGlothlin, J. W., A. J. Moore, J. B. Wolf, and E. D. Brodie III, 2336  
2280 2010 Interacting phenotypes and the evolutionary process. III. 2337  
2281 Social evolution. *Evolution* **64**: 2558–2574. 2338
- 2282 McGuigan, K. and M. Blows, 2007 The phenotypic and genetic 2339  
2283 covariance structure of *Drosophilid* wings. *Evolution* **61**: 902– 2340  
2284 911. 2341
- 2285 Medawar, P. B., 1952 *An unsolved problem of biology*. H. K. Lewis,  
2286 London, UK. 2342
- 2287 Merilä, J., B. Sheldon, and L. Kruuk, 2001 Explaining stasis: 2343  
2288 microevolutionary studies in natural populations. *Genetica* 2344  
2289 **112**: 199–222. 2345
- 2290 Metz, J. A. J., K. Staňková, and J. Johansson, 2016 The canonical 2346  
2291 equation of adaptive dynamics for life histories: from fitness- 2347  
2292 returns to selection gradients and Pontryagin’s maximum 2348  
2293 principle. *J. Math. Biol.* **72**: 1125–1152. 2349
- 2294 Meyer, K. and M. Kirkpatrick, 2008 Perils of parsimony: Proper- 2350  
2295 ties of reduced-rank estimates of genetic covariance matrices. 2351  
2296 *Genetics* **180**: 1153–1166. 2352
- 2297 Mezey, J. G. and D. Houle, 2005 The dimensionality of genetic 2353  
2298 variation for wing shape in *Drosophila melanogaster*. *Evolution* 2354  
2299 **59**: 1027–1038. 2355
- 2300 Michel, M. J., L.-M. Chevin, and J. H. Knouft, 2014 Evolution of 2356  
2301 phenotype–environment associations by genetic responses to 2357  
2302 selection and phenotypic plasticity in a temporally autocorre- 2358  
2303 lated environment. *Evolution* **68**: 1374–1384. 2359
- 2304 Milocco, L. and I. Salazar-Ciudad, 2020 Is evolution predictable? 2360  
2305 quantitative genetics under complex genotype-phenotype 2361  
2306 maps. *Evolution* **74**: 230–244. 2362
- 2307 Moore, A. J., E. D. Brodie III, and J. B. Wolf, 1997 Interacting 2363  
2308 phenotypes and the evolutionary process: I. direct and indirect 2364  
2309 genetic effects of social interactions. *Evolution* **51**: 1352–1362. 2365
- 2310 Morrissey, M. B., 2014 Selection and evolution of causally co- 2366  
2311 varying traits. *Evolution* **68**: 1748–1761. 2367
- Morrissey, M. B., 2015 Evolutionary quantitative genetics of 2368  
nonlinear developmental systems. *Evolution* **69**: 2050–2066. 2369
- Mullon, C. and L. Lehmann, 2017 Invasion fitness for gene- 2370  
culture co-evolution in family-structured populations and an 2371  
application to cumulative culture under vertical transmission. 2372  
*Theor. Popul. Biol.* **116**: 33–46. 2373
- Mullon, C. and L. Lehmann, 2018 Eco-evolutionary dynamics 2374  
in metacommunities: Ecological inheritance, helping within 2375  
species, and harming between species. *Am. Nat.* **192**: 664–686. 2376
- Mullon, C., J. Y. Wakano, and H. Ohtsuki, 2021 Coevolutionary 2377  
dynamics of genetic traits and their long-term extended effects 2378  
under non-random interactions. *J. Theor. Biol.* p. 110750. 2379
- Mylius, S. D. and O. Diekmann, 1995 On evolutionarily stable 2380  
life histories, optimization and the need to be specific about 2381  
density dependence. *Oikos* **74**: 218–224. 2382
- Nelson, R. M., M. E. Pettersson, and Ö. Carlborg, 2013 A century 2383  
after Fisher: time for a new paradigm in quantitative genetics. 2384  
*Trends Genet.* **29**: 669–676. 2385
- Noble, D. W. A., R. Radersma, and T. Uller, 2019 Plastic res- 2386  
ponses to novel environments are biased towards phenotype 2387  
dimensions with high additive genetic variation. *Proc. Natl.*  
2388 *Acad. Sci. USA* **116**: 13452–13461. 2389
- Otto, S. P. and T. Day, 2007 *A Biologist’s Guide to Mathematical*  
2390 *Models in Ecology and Evolution*. Princeton Univ. Press, Wood- 2391  
stock, UK. 2392
- Paenke, I., B. Sendhoff, and T. J. Kawecki, 2007 Influence of plas- 2393  
ticity and learning on evolution under directional selection. 2394  
*Am. Nat.* **170**: E47–E58. 2395
- Paixão, T. and N. H. Barton, 2016 The effect of gene interactions 2396  
on the long-term response to selection. *Proc. Natl. Acad. Sci.*  
2397 *USA* **113**: 4422–4427. 2398
- Parvinen, K., M. Heino, and U. Dieckmann, 2013 Function- 2399  
valued adaptive dynamics and optimal control theory. *J. Math.*  
2400 *Biol.* **67**: 509–533. 2401
- Pavlicev, M., J. M. Cheverud, and G. P. Wagner, 2011 Evolution 2402  
of adaptive phenotypic variation patterns by direct selection 2403  
for evolvability. *Proc. R. Soc. B* **278**: 1903–1912. 2404
- Pavlicev, M. and G. P. Wagner, 2012 A model of developmental 2405  
evolution: selection, pleiotropy and compensation. *Trends.*  
2406 *Ecol. Evol.* **27**: 316–322. 2407
- Pavlicev, M., G. P. Wagner, and J. M. Cheverud, 2009 Measuring 2408  
evolutionary constraints through the dimensionality of the 2409  
phenotype: adjusted bootstrap method to estimate rank of 2410  
phenotypic covariance matrices. *Evol. Biol.* **36**: 339–353. 2411
- Price, G. R., 1970 Selection and covariance. *Nature* **227**: 520–521. 2412
- Priklopil, T. and L. Lehmann, 2020 Invasion implies substitution 2413  
in ecological communities with class-structured populations. 2414  
*Theor. Popul. Biol.* **134**: 36–52. 2415
- Pujol, B., S. Blanchet, A. Charmantier, E. Danchin, B. Facon, *et al.*, 2416  
2018 The missing response to selection in the wild. *Trends*  
2417 *Ecol. Evol.* **33**: 337–346. 2418
- Rees, M. and S. P. Ellner, 2016 Evolving integral projection mod- 2419  
els: evolutionary demography meets eco-evolutionary dy- 2420  
namics. *Methods Ecol. Evol.* **7**: 157–170. 2421
- Rendell, L., L. Fogarty, and K. N. Laland, 2011 Runaway cultural 2422  
niche construction. *Phil. Trans. R. Soc. B* **366**: 823–835. 2423
- Reuter, M. and L. Keller, 2001 Sex ratio conflict and worker 2424  
production in eusocial hymenoptera. *Am. Nat.* **158**: 166–177. 2425
- Rice, S. H., 1990 A geometric model for the evolution of devel- 2426  
opment. *J. Theor. Biol.* **143**: 319–342. 2427
- Rice, S. H., 2002 A general population genetic theory for the 2428  
evolution of developmental interactions. *Proc. Natl. Acad. Sci.*  
2429 2373

2374 USA 99: 15518–15523.  
 2375 Salazar-Ciudad, I. and J. Jernvall, 2002 A gene network model  
 2376 accounting for development and evolution of mammalian  
 2377 teeth. *Proc. Natl. Acad. Sci. USA* 99: 8116–8120.  
 2378 Salazar-Ciudad, I. and M. Marín-Riera, 2013 Adaptive dynamics  
 2379 under development-based genotype–phenotype maps. *Nature*  
 2380 497: 361–364.  
 2381 Samuelson, P. A., 1947 *Foundations of economic analysis*. Harvard  
 2382 Univ. Press, Cambridge, MA, USA.  
 2383 Schaffer, W. M., 1983 The application of optimal control theory  
 2384 to the general life history problem. *Am. Nat.* 121: 418–431.  
 2385 Schluter, D., 1996 Adaptive radiation along genetic lines of least  
 2386 resistance. *Evolution* 50: 1766–1774.  
 2387 Slatkin, M., 2009 Epigenetic inheritance and the missing heri-  
 2388 tability problem. *Genetics* 182: 845–850.  
 2389 Sternberg, S., 2010 *Dynamical Systems*. Dover Publications, Inc.,  
 2390 Mineola, NY, USA.  
 2391 Sutton, R. S. and A. G. Barto, 2018 *Reinforcement Learning: An*  
 2392 *Introduction*. The MIT Press, Cambridge, Massachusetts, USA,  
 2393 second edition.  
 2394 Sydsæter, K., P. Hammond, A. Seierstad, and A. Strom, 2008 *Fur-*  
 2395 *ther Mathematics for Economic Analysis*. Prentice Hall, second  
 2396 edition.  
 2397 Taylor, H. M., R. S. Gourley, C. E. Lawrence, and R. S. Kaplan,  
 2398 1974 Natural selection of life history attributes: an analytical  
 2399 approach. *Theor. Popul. Biol.* 5: 104–122.  
 2400 Tomlin, C. J. and J. D. Axelrod, 2007 Biology by numbers: mathe-  
 2401 matical modelling in developmental biology. *Nat. Rev. Genet.*  
 2402 8: 331–340.  
 2403 Townley, S. and T. H. G. Ezard, 2013 A G matrix analogue to  
 2404 capture the cumulative effects of nongenetic inheritance. *J.*  
 2405 *Evol. Biol.* 26: 1234–1243.  
 2406 Turelli, M., 1988 Phenotypic evolution, constant covariances,  
 2407 and the maintenance of additive variance. *Evolution* 42: 1342–  
 2408 1347.  
 2409 Turing, A. M., 1952 The chemical basis of morphogenesis. *Phil.*  
 2410 *Trans. R. Soc. Lond. B* 237: 37–72.  
 2411 Via, S. and R. Lande, 1985 Genotype-environment interaction  
 2412 and the evolution of phenotypic plasticity. *Evolution* 39: 505–  
 2413 522.  
 2414 Waddington, C. H., 1959 Evolutionary adaptation. *Perspect. Biol.*  
 2415 *Med.* 2: 379–401.  
 2416 Wagner, G. P., 1984 On the eigenvalue distribution of genetic and  
 2417 phenotypic dispersion matrices: Evidence for a nonrandom  
 2418 organization of quantitative character variation. *J. Math. Biol.*  
 2419 21: 77–95.  
 2420 Wagner, G. P., 1988 The influence of variation and of devel-  
 2421 opmental constraints on the rate of multivariate phenotypic  
 2422 evolution. *J. Evol. Biol.* 1: 45–66.  
 2423 Wagner, G. P., 1989 Multivariate mutation-selection balance with  
 2424 constrained pleiotropic effects. *Genetics* 122: 223–234.  
 2425 Wagner, G. P., 1996 Homologues, natural kinds and the evolution  
 2426 of modularity. *Am. Zool.* 36: 36–43.  
 2427 Wagner, G. P. and J. Zhang, 2011 The pleiotropic structure of  
 2428 the genotype-phenotype map: the evolvability of complex  
 2429 organisms. *Nat. Rev. Genet.* 12: 204–213.  
 2430 Walsh, B. and M. W. Blows, 2009 Abundant genetic variation  
 2431 + strong selection = multivariate genetic constraints: A ge-  
 2432 ometric view of adaptation. *Annu. Rev. Ecol. Evol. Syst.* 40:  
 2433 41–59.  
 2434 Walsh, B. and M. Lynch, 2018 *Evolution and Selection of Quantita-*  
 2435 *tive Traits*. Oxford Univ. Press, Oxford, UK.

2436 Watson, R. A., G. P. Wagner, M. Pavlicev, D. M. Weinreich, and  
 2437 R. Mills, 2013 The evolution of phenotypic correlations and  
 2438 “developmental memory”. *Evolution* 68: 1124–1138.  
 2439 Welch, J. J., 2017 What’s wrong with evolutionary biology? *Biol.*  
 2440 *Philos.* 32: 263–279.  
 2441 West-Eberhard, M. J., 2003 *Developmental Plasticity and Evolution*.  
 2442 Oxford Univ. Press, Oxford, UK.  
 2443 Wild, G. and A. Traulsen, 2007 The different limits of weak  
 2444 selection and the evolutionary dynamics of finite populations.  
 2445 *J. Theor. Biol.* 247: 382–390.  
 2446 Wright, S., 1942 Statistical genetics and evolution. *Bull. Amer.*  
 2447 *Math. Soc.* 48: 223–246.

## 2448 Appendix 1: canonical equation

2449 Here we derive the equation describing the evolutionary dynam-  
 2450 ics of controls. This derivation closely follows that of Dieckmann  
 2451 and Law (1996) except in a few places, particularly in that we  
 2452 consider deterministic population dynamics so the only source  
 2453 of stochasticity in our framework is due to mutation. Denote  
 2454 by  $\bar{\mathbf{y}}'(\tau + \Delta\tau)$  a multivariate random variable describing the  
 2455 possible residents at time  $\tau + \Delta\tau$  following fixation of mutants  
 2456 arising at time  $\tau$ . Let this random variable have probability  
 2457 density function  $P(\bar{\mathbf{y}}', \tau + \Delta\tau)$  at time  $\tau + \Delta\tau$ , with support in  
 2458  $\mathbb{R}^{N_a N_c}$ . Hence, the expected resident controls at time  $\tau + \Delta\tau$  are

$$E[\bar{\mathbf{y}}'(\tau + \Delta\tau)] = \int_{\mathbb{R}^{N_a N_c}} \bar{\mathbf{y}}' P(\bar{\mathbf{y}}', \tau + \Delta\tau) d\bar{\mathbf{y}}' \equiv \bar{\mathbf{y}}(\tau + \Delta\tau).$$

2459 The evolutionary change in resident controls thus satisfies

$$\begin{aligned} \frac{\Delta\bar{\mathbf{y}}}{\Delta\tau} &= \frac{E[\bar{\mathbf{y}}'(\tau + \Delta\tau)] - E[\bar{\mathbf{y}}'(\tau)]}{\Delta\tau} \\ &= \frac{1}{\Delta\tau} \left( \int_{\mathbb{R}^{N_a N_c}} \bar{\mathbf{y}}' P(\bar{\mathbf{y}}', \tau + \Delta\tau) d\bar{\mathbf{y}}' - \int_{\mathbb{R}^{N_a N_c}} \bar{\mathbf{y}}' P(\bar{\mathbf{y}}', \tau) d\bar{\mathbf{y}}' \right). \end{aligned}$$

2460 Factorizing yields

$$\begin{aligned} \frac{\Delta\bar{\mathbf{y}}}{\Delta\tau} &= \int_{\mathbb{R}^{N_a N_c}} \bar{\mathbf{y}}' \frac{P(\bar{\mathbf{y}}', \tau + \Delta\tau) - P(\bar{\mathbf{y}}', \tau)}{\Delta\tau} d\bar{\mathbf{y}}' \\ &= \int_{\mathbb{R}^{N_a N_c}} \bar{\mathbf{y}}' \frac{\Delta P(\bar{\mathbf{y}}', \tau)}{\Delta\tau} d\bar{\mathbf{y}}'. \end{aligned}$$

2461 Now, the evolutionary change in the resident-control distribu-  
 2462 tion satisfies the master equation

$$\frac{\Delta P(\bar{\mathbf{y}}', \tau)}{\Delta\tau} = \int_{\mathbb{R}^{N_a N_c}} [\omega(\mathbf{y} \rightarrow \bar{\mathbf{y}}') P(\mathbf{y}, \tau) - \omega(\bar{\mathbf{y}}' \rightarrow \mathbf{y}) P(\bar{\mathbf{y}}', \tau)] d\mathbf{y},$$

2463 where  $\omega(\mathbf{y} \rightarrow \bar{\mathbf{y}}')$  is the rate at which a resident  $\mathbf{y}$  is replaced by  
 2464  $\bar{\mathbf{y}}'$ . Then, the evolutionary change in controls is

$$\begin{aligned} \frac{\Delta\bar{\mathbf{y}}}{\Delta\tau} &= \int_{\mathbb{R}^{N_a N_c}} \bar{\mathbf{y}}' \left( \int_{\mathbb{R}^{N_a N_c}} [\omega(\mathbf{y} \rightarrow \bar{\mathbf{y}}') P(\mathbf{y}, \tau) \right. \\ &\quad \left. - \omega(\bar{\mathbf{y}}' \rightarrow \mathbf{y}) P(\bar{\mathbf{y}}', \tau)] d\mathbf{y} \right) d\bar{\mathbf{y}}'. \end{aligned}$$

2465 Since the integral is a linear operator, we have

$$\frac{\Delta\bar{\mathbf{y}}}{\Delta\tau} = \int_{\mathbb{R}^{N_a N_c}} \int_{\mathbb{R}^{N_a N_c}} \bar{\mathbf{y}}' \omega(\mathbf{y} \rightarrow \bar{\mathbf{y}}') P(\mathbf{y}, \tau) d\mathbf{y} d\bar{\mathbf{y}}'$$

$$- \int_{\mathbb{R}^{N_a N_c}} \int_{\mathbb{R}^{N_a N_c}} \bar{\mathbf{y}}' \omega(\bar{\mathbf{y}}' \rightarrow \mathbf{y}) P(\bar{\mathbf{y}}', \tau) d\mathbf{y} d\bar{\mathbf{y}}'.$$

2466 Exchanging  $\mathbf{y}$  for  $\bar{\mathbf{y}}'$  in the first term since they are dummy  
2467 variables yields

$$\begin{aligned} \frac{\Delta \bar{\mathbf{y}}}{\Delta \tau} &= \int_{\mathbb{R}^{N_a N_c}} \int_{\mathbb{R}^{N_a N_c}} \mathbf{y} \omega(\bar{\mathbf{y}}' \rightarrow \mathbf{y}) P(\bar{\mathbf{y}}', \tau) d\mathbf{y} d\bar{\mathbf{y}}' \\ &\quad - \int_{\mathbb{R}^{N_a N_c}} \int_{\mathbb{R}^{N_a N_c}} \bar{\mathbf{y}}' \omega(\bar{\mathbf{y}}' \rightarrow \mathbf{y}) P(\bar{\mathbf{y}}', \tau) d\mathbf{y} d\bar{\mathbf{y}}'. \end{aligned}$$

2468 Factorizing yields

$$\frac{\Delta \bar{\mathbf{y}}}{\Delta \tau} = \int_{\mathbb{R}^{N_a N_c}} \int_{\mathbb{R}^{N_a N_c}} (\mathbf{y} - \bar{\mathbf{y}}') \omega(\bar{\mathbf{y}}' \rightarrow \mathbf{y}) P(\bar{\mathbf{y}}', \tau) d\mathbf{y} d\bar{\mathbf{y}}'. \quad (\text{A1})$$

2469 Assuming that invasion implies fixation, we let the rate at  
2470 which resident  $\bar{\mathbf{y}}'$  is replaced by  $\mathbf{y}$  be

$$\omega(\bar{\mathbf{y}}' \rightarrow \mathbf{y}) = \delta(\bar{\mathbf{y}}' - \bar{\mathbf{y}}) \frac{M(\mathbf{y}, \bar{\mathbf{y}}')}{P(\bar{\mathbf{y}}', \tau)} [\lambda(\mathbf{y}, \bar{\mathbf{y}}') - 1], \quad (\text{A2})$$

2471 where  $\delta(\cdot)$  is the Dirac delta function. This expression for  
2472  $\omega(\bar{\mathbf{y}}' \rightarrow \mathbf{y})$  can be understood as comprising the probability  
2473 density  $\delta(\bar{\mathbf{y}}' - \bar{\mathbf{y}})$  that the resident  $\bar{\mathbf{y}}'$  is  $\bar{\mathbf{y}}$ , times the conditional  
2474 probability density  $M(\mathbf{y}, \bar{\mathbf{y}}')/P(\bar{\mathbf{y}}', \tau)$  that a mutant is  $\mathbf{y}$  given  
2475 that the resident is  $\bar{\mathbf{y}}'$  at time  $\tau$ , times the rate of substitution  
2476  $\lambda(\mathbf{y}, \bar{\mathbf{y}}') - 1$  for a mutant  $\mathbf{y}$  in the context of resident  $\bar{\mathbf{y}}'$ . Substi-  
2477 tuting Eq. (A2) into Eq. (A1) using Eq. (13) yields

$$\begin{aligned} \frac{\Delta \bar{\mathbf{y}}}{\Delta \tau} &= \int_{\mathbb{R}^{N_a N_c}} \int_{\mathbb{R}^{N_a N_c}} \left\{ (\mathbf{y} - \bar{\mathbf{y}}') \delta(\bar{\mathbf{y}}' - \bar{\mathbf{y}}) \frac{M(\mathbf{y}, \bar{\mathbf{y}}')}{P(\bar{\mathbf{y}}', \tau)} \right. \\ &\quad \left. \left[ (\mathbf{y} - \bar{\mathbf{y}}')^\top \frac{d\lambda}{d\mathbf{y}} \Big|_{\mathbf{y}=\bar{\mathbf{y}}'} + O(\|\mathbf{y} - \bar{\mathbf{y}}'\|^2) \right] P(\bar{\mathbf{y}}', \tau) \right\} d\mathbf{y} d\bar{\mathbf{y}}'. \end{aligned}$$

2478 Cancelling  $P(\bar{\mathbf{y}}', \tau)$  produces

$$\begin{aligned} \frac{\Delta \bar{\mathbf{y}}}{\Delta \tau} &= \int_{\mathbb{R}^{N_a N_c}} \int_{\mathbb{R}^{N_a N_c}} \left\{ (\mathbf{y} - \bar{\mathbf{y}}') \delta(\bar{\mathbf{y}}' - \bar{\mathbf{y}}) M(\mathbf{y}, \bar{\mathbf{y}}') \right. \\ &\quad \left. \left[ (\mathbf{y} - \bar{\mathbf{y}}')^\top \frac{d\lambda}{d\mathbf{y}} \Big|_{\mathbf{y}=\bar{\mathbf{y}}'} + O(\|\mathbf{y} - \bar{\mathbf{y}}'\|^2) \right] \right\} d\mathbf{y} d\bar{\mathbf{y}}'. \end{aligned}$$

2479 Using the integration property of the Dirac delta function [i.e.,  
2480  $\int_{\mathbb{R}^n} F(\mathbf{y}) \delta(\mathbf{y} - \bar{\mathbf{y}}) d\mathbf{y} = F(\bar{\mathbf{y}})$  for any function  $F(\mathbf{y})$  with  $\mathbf{y} \in \mathbb{R}^n$ ],

$$\begin{aligned} \frac{\Delta \bar{\mathbf{y}}}{\Delta \tau} &= \int_{\mathbb{R}^{N_a N_c}} \left\{ (\mathbf{y} - \bar{\mathbf{y}}) M(\mathbf{y}, \bar{\mathbf{y}}) \right. \\ &\quad \left. \left[ (\mathbf{y} - \bar{\mathbf{y}})^\top \frac{d\lambda}{d\mathbf{y}} \Big|_{\mathbf{y}=\bar{\mathbf{y}}} + O(\|\mathbf{y} - \bar{\mathbf{y}}\|^2) \right] \right\} d\mathbf{y}. \end{aligned}$$

2481 Since the integral is a linear operator and because the evaluation  
2482 at  $\mathbf{y} = \bar{\mathbf{y}}$  makes the gradient constant with respect to  $\mathbf{y}$ , then

$$\begin{aligned} \frac{\Delta \bar{\mathbf{y}}}{\Delta \tau} &= \left[ \int_{\mathbb{R}^{N_a N_c}} (\mathbf{y} - \bar{\mathbf{y}}) (\mathbf{y} - \bar{\mathbf{y}})^\top M(\mathbf{y}, \bar{\mathbf{y}}) d\mathbf{y} \right] \frac{d\lambda}{d\mathbf{y}} \Big|_{\mathbf{y}=\bar{\mathbf{y}}} \\ &\quad + \int_{\mathbb{R}^{N_a N_c}} M(\mathbf{y}, \bar{\mathbf{y}}) O((\mathbf{y} - \bar{\mathbf{y}}) (\mathbf{y} - \bar{\mathbf{y}})^\top (\mathbf{y} - \bar{\mathbf{y}})) d\mathbf{y}. \end{aligned}$$

By definition of covariance matrix, we have

$$\begin{aligned} \frac{\Delta \bar{\mathbf{y}}}{\Delta \tau} &= \text{cov}[\mathbf{y}, \mathbf{y}] \frac{d\lambda}{d\mathbf{y}} \Big|_{\mathbf{y}=\bar{\mathbf{y}}} \\ &\quad + O \left( \int_{\mathbb{R}^{N_a N_c}} M(\mathbf{y}, \bar{\mathbf{y}}) [(\mathbf{y} - \bar{\mathbf{y}}) (\mathbf{y} - \bar{\mathbf{y}})^\top (\mathbf{y} - \bar{\mathbf{y}})] d\mathbf{y} \right). \end{aligned}$$

The matrix  $\text{cov}[\mathbf{y}, \mathbf{y}]$  is the mutational covariance matrix (of controls) (of controls). The big-O term on the right in the last equality is on the order of a measure of skewness of the mutational distribution. As we assume that the mutational distribution is symmetric, skewness vanishes, which yields

$$\frac{\Delta \bar{\mathbf{y}}}{\Delta \tau} = \text{cov}[\mathbf{y}, \mathbf{y}] \frac{d\lambda}{d\mathbf{y}} \Big|_{\mathbf{y}=\bar{\mathbf{y}}}. \quad (\text{A3})$$

This recovers a form of the canonical equation of adaptive dynamics (cf. Eq. 6.1 of Dieckmann and Law 1996 and Eq. 23 of Durinx et al. 2008).

We can rewrite the right-hand side of the canonical equation (A3) in a form that is reminiscent of the Price equation (Price 1970). Indeed, subtracting  $E[\lambda]$  from Eq. (13) yields

$$\lambda - E[\lambda] = 1 - E[\lambda] + (\mathbf{y} - \bar{\mathbf{y}})^\top \frac{d\lambda}{d\mathbf{y}} \Big|_{\mathbf{y}=\bar{\mathbf{y}}} + O(\|\mathbf{y} - \bar{\mathbf{y}}\|^2),$$

and premultiplying by  $(\mathbf{y} - \bar{\mathbf{y}})$  produces

$$\begin{aligned} (\mathbf{y} - \bar{\mathbf{y}}) (\lambda - E[\lambda]) &= (\mathbf{y} - \bar{\mathbf{y}}) (1 - E[\lambda]) \\ &\quad + (\mathbf{y} - \bar{\mathbf{y}}) (\mathbf{y} - \bar{\mathbf{y}})^\top \frac{d\lambda}{d\mathbf{y}} \Big|_{\mathbf{y}=\bar{\mathbf{y}}} \\ &\quad + O((\mathbf{y} - \bar{\mathbf{y}}) (\mathbf{y} - \bar{\mathbf{y}})^\top (\mathbf{y} - \bar{\mathbf{y}})). \end{aligned} \quad (\text{A4})$$

Taking the expectation over the mutational distribution yields

$$\begin{aligned} E[(\mathbf{y} - \bar{\mathbf{y}}) (\lambda - E[\lambda])] &= E[(\mathbf{y} - \bar{\mathbf{y}}) (\mathbf{y} - \bar{\mathbf{y}})^\top] \frac{d\lambda}{d\mathbf{y}} \Big|_{\mathbf{y}=\bar{\mathbf{y}}} \\ &\quad + O(E[(\mathbf{y} - \bar{\mathbf{y}}) (\mathbf{y} - \bar{\mathbf{y}})^\top (\mathbf{y} - \bar{\mathbf{y}})]), \end{aligned} \quad (\text{A5})$$

where the total selection gradient of controls is outside of the expectation because the evaluation at  $\mathbf{y} = \bar{\mathbf{y}}$  makes the gradient constant with respect to  $\mathbf{y}$ . From the definition of cross-covariance matrix, and since we assume that the mutational distribution is symmetric, Eq. (A5) becomes

$$\text{cov}[\mathbf{y}, \lambda] = \text{cov}[\mathbf{y}, \mathbf{y}] \frac{d\lambda}{d\mathbf{y}} \Big|_{\mathbf{y}=\bar{\mathbf{y}}}. \quad (\text{A6})$$

The left-hand side of Eq. (A6) is reminiscent of the Price equation (Price 1970; Frank 2012), which states that the evolutionary change of a univariate trait in the absence of transmission bias equals the covariance of the trait and relative fitness. Yet, note that there are differences between invasion fitness and relative fitness; in particular, invasion fitness is not the relative number of descendants at evolutionary time  $\tau + 1$  of rare mutants at  $\tau$  (for any  $\lambda > 1$  all residents at  $\tau + 1$  are descendants of mutants at  $\tau$ , yet for any  $\lambda < 1$  none is).

When deriving the evolutionary dynamics of the phenotype  $\mathbf{z}$ , we will obtain dynamic equations in terms of additive genetic covariance matrices. In particular, we will see that the mutational covariance matrix  $\text{cov}[\mathbf{y}, \mathbf{y}]$  that we obtained in the canonical equation (A3) equals the additive genetic covariance matrix of controls. Indeed, in Eq. (77), we define the additive

2517 genetic covariance matrix  $\mathbf{G}_\zeta$  of a vector  $\zeta \in \mathbb{R}^{m \times 1}$  under our  
2518 adaptive dynamics assumptions, and show that

$$\mathbf{G}_\zeta = \left( \frac{d\zeta}{dy^T} \text{cov}[y, y] \frac{d\zeta^T}{dy} \right) \Big|_{y=\bar{y}}.$$

2519 In particular, as we will later show that, since controls do  
2520 not have developmental constraints and are open-loop so  
2521  $dy^T/dy|_{y=\bar{y}} = \mathbf{I}$  (Eq. A51), it follows that the additive genetic co-  
2522 variance matrix of controls  $\mathbf{G}_y$  equals the mutational covariance  
2523 matrix  $\text{cov}[y, y]$ . This and Eq. (A3) yield Eq. (14a).

## 2524 Appendix 2: stable age distribution and reproductive 2525 values

2526 The mutant stable age distribution and mutant reproductive  
2527 value are given by dominant left and right eigenvectors  $\mathbf{v}$  and  $\mathbf{u}$   
2528 of the mutant's local stability matrix  $\mathbf{J}$  in Eq. (11). That is,  $\mathbf{v}$  and  $\mathbf{u}$   
2529 are defined respectively by  $\lambda \mathbf{u} = \mathbf{J} \mathbf{u}$  and  $\lambda \mathbf{v}^T = \mathbf{v}^T \mathbf{J}$ . Expanding  
2530 these equations yields

$$\lambda u_1 = \sum_{j=1}^{N_a} f_j u_j \quad (\text{A7a})$$

$$\lambda u_j = p_{j-1} u_{j-1} \quad \text{for } j \in \{2, \dots, N_a\} \quad (\text{A7b})$$

$$\lambda v_j = v_1 f_j + v_{j+1} p_j \quad \text{for } j \in \{1, \dots, N_a\}, \quad (\text{A7c})$$

2531 since  $v_{N_a+1} = 0$  without loss of generality. Eqs. (A7b) and (A7c)  
2532 give the recurrence equations

$$u_j = \lambda^{-1} p_{j-1} u_{j-1}$$

$$v_j = \frac{1}{p_{j-1}} \lambda v_{j-1} - \frac{1}{p_{j-1}} v_1 f_{j-1},$$

2533 for  $j \in \{2, \dots, N_a\}$ , which iterating yield

$$u_j = \lambda^{-j+1} \ell_j u_1 \quad (\text{A9a})$$

$$v_j = \frac{1}{\ell_j} \lambda^{j-1} v_1 - v_1 \sum_{k=1}^{j-1} \frac{\lambda^{j-1-k}}{\ell_j / \ell_k} f_k$$

$$= \frac{1}{\ell_j} \lambda^{j-1} v_1 \left( 1 - \sum_{k=1}^{j-1} \lambda^{-k} \ell_k f_k \right), \quad (\text{A9b})$$

2534 where  $\ell_j = \prod_{k=1}^{j-1} p_k$  is mutant survivorship from age 1 to age  $j$ .  
2535 Eq. (A9b) can be rewritten in the standard form of Fisher's (1927)  
2536 reproductive value in discrete time using the Euler-Lotka equa-  
2537 tion as follows. Defining  $\ell_1 = 1$  and since  $\lambda^0 = 1$ , substituting  
2538 Eq. (A9a) in Eq. (A7a) and dividing both sides of the equation  
2539 by  $\lambda u_1$  yields

$$1 = \sum_{j=1}^{N_a} \lambda^{-j} \ell_j f_j, \quad (\text{A10})$$

2540 which is the Euler-Lotka equation in discrete time (Charlesworth  
2541 1994, Eq. 1.42 and Caswell 2001, Eq. 4.42). Partitioning the sum  
2542 in Eq. (A10) yields

$$1 - \sum_{j=1}^{m-1} \lambda^{-j} \ell_j f_j = \sum_{j=m}^{N_a} \lambda^{-j} \ell_j f_j, \quad (\text{A11})$$

2543 which substituted in Eq. (A9b) yields

$$v_j = \frac{1}{\ell_j} \lambda^{j-1} v_1 \sum_{k=j}^{N_a} \lambda^{-k} \ell_k f_k. \quad (\text{A12})$$

This equation is the standard form of Fisher's (1927) reproduc-  
2544 tive value in discrete time (Eq. 4.89 of Caswell 2001). Hence,  
2545 from Eqs. (A9a) and (A12), we obtain the mutant stable age  
2546 distribution and mutant reproductive value:  
2547

$$u_j = \lambda^{-j+1} \ell_j u_1$$

$$v_j = \frac{1}{\ell_j} \lambda^{j-1} v_1 \sum_{k=j}^{N_a} \lambda^{-k} \ell_k f_k,$$

for  $j \in \{2, \dots, N_a\}$ , where  $u_1$  and  $v_1$  can take any positive value.  
Evaluating at neutrality ( $y = \bar{y}$ ), we have that  $\lambda^\circ = \lambda|_{y=\bar{y}} = 1$ ,  
2549 which yields Eqs. (19).  
2550

Bienvenu and Legendre (2015) find that generation time can  
2551 be measured by  
2552

$$T = \frac{\mathbf{v}^\circ \mathbf{T} \mathbf{u}^\circ}{\mathbf{v}^\circ \mathbf{T} \mathbf{F}^\circ \mathbf{u}^\circ},$$

2553 where we evaluate at resident trait values given our adaptive  
2554 dynamics assumptions, and where  $\mathbf{F}$  is given by Eq. (11) setting  
2555 all  $p_j$  to zero. Using Eq. (A7a), it is easily checked that  $\mathbf{v}^\circ \mathbf{T} \mathbf{F}^\circ \mathbf{u}^\circ =$   
2556  $v_1^\circ u_1^\circ$ . In turn, we have that the numerator is

$$\mathbf{v}^\circ \mathbf{T} \mathbf{u}^\circ = \sum_{j=1}^{N_a} v_j^\circ u_j^\circ.$$

Thus, using Eqs. (19) yields

$$T = \frac{\mathbf{v}^\circ \mathbf{T} \mathbf{u}^\circ}{v_1^\circ u_1^\circ} = \frac{v_1^\circ u_1^\circ + \sum_{j=2}^{N_a} v_j^\circ u_j^\circ}{v_1^\circ u_1^\circ}$$

$$= \frac{v_1^\circ u_1^\circ + v_1^\circ u_1^\circ \sum_{j=2}^{N_a} \sum_{k=j}^{N_a} \ell_k^\circ f_k^\circ}{v_1^\circ u_1^\circ}$$

$$= 1 + \sum_{j=2}^{N_a} \sum_{k=j}^{N_a} \ell_k^\circ f_k^\circ. \quad (\text{A14})$$

2558 We further manipulate this expression to recover a standard  
2559 expression of generation time (Charlesworth 1994, Eq. 1.47c; Bul-  
2560 mer 1994, Eq. 25, Ch. 25; Bienvenu and Legendre 2015, Eq. 5).  
2561 Evaluating the Euler-Lotka equation (A10) at the resident con-  
2562 trols (so  $\lambda|_{y=\bar{y}} = 1$ ), we obtain that a neutral mutant's expected  
2563 lifetime reproductive success is

$$R_0^\circ = \sum_{j=1}^{N_a} \ell_j^\circ f_j^\circ = 1. \quad (\text{A15})$$

Therefore, Eq. (A14) is

$$T = 1 + \sum_{j=2}^{N_a} \sum_{k=j}^{N_a} \ell_k^\circ f_k^\circ = R_0^\circ + \sum_{j=2}^{N_a} \sum_{k=j}^{N_a} \ell_k^\circ f_k^\circ$$

$$= \sum_{j=1}^{N_a} \ell_j^\circ f_j^\circ + \sum_{j=2}^{N_a} \sum_{k=j}^{N_a} \ell_k^\circ f_k^\circ$$

$$= \ell_1^\circ f_1^\circ + \sum_{j=2}^{N_a} \ell_j^\circ f_j^\circ + \sum_{j=2}^{N_a} \sum_{k=j}^{N_a} \ell_k^\circ f_k^\circ$$

$$= \ell_1^\circ f_1^\circ + \sum_{j=2}^{N_a} \left( \ell_j^\circ f_j^\circ + \sum_{k=j}^{N_a} \ell_k^\circ f_k^\circ \right).$$

2565 Expanding the rightmost sum yields

$$T = \ell_1^\circ f_1^\circ + \sum_{j=2}^{N_a} \left( \ell_j^\circ f_j^\circ + \ell_j^\circ f_j^\circ + \ell_{j+1}^\circ f_{j+1}^\circ + \cdots + \ell_{N_a}^\circ f_{N_a}^\circ \right)$$

2566 Expanding the remaining sum yields

$$\begin{aligned} T &= \ell_1^\circ f_1^\circ + (\ell_2^\circ f_2^\circ + \ell_2^\circ f_2^\circ + \ell_3^\circ f_3^\circ + \cdots + \ell_{N_a}^\circ f_{N_a}^\circ) \\ &\quad + (\ell_3^\circ f_3^\circ + \ell_3^\circ f_3^\circ + \ell_4^\circ f_4^\circ + \cdots + \ell_{N_a}^\circ f_{N_a}^\circ) \\ &\quad + \cdots \\ &\quad + (\ell_{N_a-1}^\circ f_{N_a-1}^\circ + \ell_{N_a-1}^\circ f_{N_a-1}^\circ + \ell_{N_a}^\circ f_{N_a}^\circ) \\ &\quad + (\ell_{N_a}^\circ f_{N_a}^\circ + \ell_{N_a}^\circ f_{N_a}^\circ). \end{aligned}$$

2567 Collecting common terms yields

$$\begin{aligned} T &= \ell_1^\circ f_1^\circ + 2\ell_2^\circ f_2^\circ + 3\ell_3^\circ f_3^\circ + 4\ell_4^\circ f_4^\circ \\ &\quad + \cdots + N_a \ell_{N_a}^\circ f_{N_a}^\circ \\ &= \sum_{j=1}^{N_a} j \ell_j^\circ f_j^\circ, \end{aligned} \quad (\text{A16})$$

2568 which is Eq. (21). This expression recovers a standard measure  
2569 of generation time (Charlesworth 1994, Eq. 1.47c; Bulmer 1994,  
2570 Eq. 25, Ch. 25; Bienvenu and Legendre 2015, Eq. 5).

### 2571 Appendix 3: selection gradient in terms of $R_0$

Following Hamilton (1966) (see also Eqs. 58-61 in Caswell 2009), we differentiate the Euler-Lotka equation (A10) implicitly with respect to a mutant trait value  $\zeta$ , which yields

$$0 = \sum_{j=1}^{N_a} \left( \lambda^{-j} \frac{\partial \ell_j f_j}{\partial \zeta} - j \ell_j f_j \lambda^{-j-1} \frac{\partial \lambda}{\partial \zeta} \right) \Big|_{\mathbf{y}=\bar{\mathbf{y}}}.$$

2572 Noting that  $\lambda|_{\mathbf{y}=\bar{\mathbf{y}}} = 1$  and solving for the selection gradient, we  
2573 obtain

$$\begin{aligned} \frac{\partial \lambda}{\partial \zeta} \Big|_{\mathbf{y}=\bar{\mathbf{y}}} &= \frac{1}{\sum_{j=1}^{N_a} j \ell_j^\circ f_j^\circ} \sum_{j=1}^{N_a} \frac{\partial \ell_j f_j}{\partial \zeta} \Big|_{\mathbf{y}=\bar{\mathbf{y}}} \\ &= \frac{1}{T} \frac{\partial R_0}{\partial \zeta} \Big|_{\mathbf{y}=\bar{\mathbf{y}}}, \end{aligned} \quad (\text{A17})$$

2574 where we use Eqs. (28) and (A16). This is Eq. (29a). The same  
2575 procedure using total derivatives yields Eq. (29b).

### 2576 Appendix 4: total selection gradient of states

2577 Here we derive the total selection gradient of states  $d\lambda/d\mathbf{x}|_{\mathbf{y}=\bar{\mathbf{y}}}$ ,  
2578 which is part of and simpler to derive than the total selection  
2579 gradient of controls  $d\lambda/d\mathbf{y}|_{\mathbf{y}=\bar{\mathbf{y}}}$ .

#### 2580 Total selection gradient of states in terms of direct fitness effects

2582 We start by considering the total selection gradient entry for the  
2583  $i$ -th state variable at age  $a$ . By this, we mean the total selection  
2584 gradient of a perturbation of  $x_{ia}$  taken as initial condition of  
2585 the recurrence equation (8) when applied at the ages  $\{a, \dots, n\}$ .  
2586 Consequently, a state perturbation at a given age does not affect  
2587 states at earlier ages, in short, due to the arrow of developmental  
2588 time. By letting  $\zeta$  in Eq. (27) be  $x_{ia}$ , we have

$$\frac{d\lambda}{dx_{ia}} \Big|_{\mathbf{y}=\bar{\mathbf{y}}} = \frac{dw}{dx_{ia}} \Big|_{\mathbf{y}=\bar{\mathbf{y}}} = \sum_{j=1}^{N_a} \frac{dw_j}{dx_{ia}} \Big|_{\mathbf{y}=\bar{\mathbf{y}}}. \quad (\text{A18})$$

Note that the total derivatives of a mutant's relative fitness at age  $j$  in Eq. (A18) are with respect to the individual's state variables at possibly another age  $a$ . From Eq. (24), we have that a mutant's relative fitness at age  $j$ ,  $w_j(\mathbf{z}_j, \bar{\mathbf{z}}, \mathbf{h}_j(\mathbf{z}_j, \bar{\mathbf{z}}, \tau))$ , depends on the individual's state variables at the current age (recall  $\mathbf{z}_j = (x_j; \mathbf{y}_j)$ ), but from the developmental constraint in Eq. (8) the state variables at a given age depend on state variables at previous ages. We must then calculate the total derivatives of fitness in Eq. (A18) in terms of direct (i.e., partial) derivatives, thus separating the effects of state variables at the current age from those of state variables at other ages.

To do this, we start by applying the chain rule, and since we assume that controls are open-loop (hence, controls do not depend on states, so  $dy_i/dx_{ia} = 0$  for all  $i \in \{1, \dots, N_s\}$  and all  $a, j \in \{1, \dots, N_a\}$ ), we obtain

$$\frac{dw_j}{dx_{ia}} \Big|_{\mathbf{y}=\bar{\mathbf{y}}} = \left( \sum_{k=1}^{N_s} \frac{\partial w_j}{\partial x_{kj}} \frac{dx_{kj}}{dx_{ia}} + \sum_{k=1}^{N_s} \sum_{r=1}^{N_e} \frac{\partial w_j}{\partial \epsilon_{rj}} \frac{\partial \epsilon_{rj}}{\partial x_{kj}} \frac{dx_{kj}}{dx_{ia}} \right) \Big|_{\mathbf{y}=\bar{\mathbf{y}}}.$$

Applying matrix calculus notation (Appendix 14), this is

$$\frac{dw_j}{dx_{ia}} \Big|_{\mathbf{y}=\bar{\mathbf{y}}} = \left( \frac{d\mathbf{x}_j^\top}{dx_{ia}} \frac{\partial w_j}{\partial \mathbf{x}_j} + \sum_{k=1}^{N_s} \frac{\partial \mathbf{e}_j^\top}{\partial x_{kj}} \frac{\partial w_j}{\partial \mathbf{e}_j} \frac{dx_{kj}}{dx_{ia}} \right) \Big|_{\mathbf{y}=\bar{\mathbf{y}}}.$$

Applying matrix calculus notation again yields

$$\frac{dw_j}{dx_{ia}} \Big|_{\mathbf{y}=\bar{\mathbf{y}}} = \left( \frac{d\mathbf{x}_j^\top}{dx_{ia}} \frac{\partial w_j}{\partial \mathbf{x}_j} + \frac{d\mathbf{x}_j^\top}{dx_{ia}} \frac{\partial \mathbf{e}_j^\top}{\partial \mathbf{x}_j} \frac{\partial w_j}{\partial \mathbf{e}_j} \right) \Big|_{\mathbf{y}=\bar{\mathbf{y}}}.$$

Factorizing, we have

$$\frac{dw_j}{dx_{ia}} \Big|_{\mathbf{y}=\bar{\mathbf{y}}} = \left[ \frac{d\mathbf{x}_j^\top}{dx_{ia}} \left( \frac{\partial w_j}{\partial \mathbf{x}_j} + \frac{\partial \mathbf{e}_j^\top}{\partial \mathbf{x}_j} \frac{\partial w_j}{\partial \mathbf{e}_j} \right) \right] \Big|_{\mathbf{y}=\bar{\mathbf{y}}}. \quad (\text{A19})$$

Eq. (A19) now contains only partial derivatives of age-specific fitness.

We now write Eq. (A19) in terms of partial derivatives of lifetime fitness. Consider the selection gradient of states at age  $j$  or, equivalently, the column vector of direct effects of a mutant's states at age  $j$  on fitness defined as

$$\frac{\partial w}{\partial \mathbf{x}_j} \Big|_{\mathbf{y}=\bar{\mathbf{y}}} \equiv \left( \frac{\partial w}{\partial x_{1j}}, \dots, \frac{\partial w}{\partial x_{N_s j}} \right)^\top \Big|_{\mathbf{y}=\bar{\mathbf{y}}} \in \mathbb{R}^{N_s \times 1}.$$

Such selection gradient of states at age  $j$  forms the selection gradient of states for all ages (Eq. 30). Similarly, the column vector of direct effects of a mutant's environment at age  $j$  on fitness is

$$\frac{\partial w}{\partial \mathbf{e}_j} \Big|_{\mathbf{y}=\bar{\mathbf{y}}} \equiv \left( \frac{\partial w}{\partial \epsilon_{1j}}, \dots, \frac{\partial w}{\partial \epsilon_{N_e j}} \right)^\top \Big|_{\mathbf{y}=\bar{\mathbf{y}}} \in \mathbb{R}^{N_e \times 1},$$

and the matrix of direct effects of a mutant's states at age  $j$  on her environment at age  $j$  is

$$\frac{\partial \mathbf{e}_j^\top}{\partial \mathbf{x}_j} \Big|_{\mathbf{y}=\bar{\mathbf{y}}} \equiv \left( \begin{array}{ccc} \frac{\partial \epsilon_{1j}}{\partial x_{1j}} & \cdots & \frac{\partial \epsilon_{N_e j}}{\partial x_{1j}} \\ \vdots & \ddots & \vdots \\ \frac{\partial \epsilon_{1j}}{\partial x_{N_s j}} & \cdots & \frac{\partial \epsilon_{N_e j}}{\partial x_{N_s j}} \end{array} \right) \Big|_{\mathbf{y}=\bar{\mathbf{y}}} \in \mathbb{R}^{N_e \times N_s}.$$

2618 From Eq. (26),  $w$  only depends directly on  $x_j$ ,  $y_j$ , and  $\mathbf{e}_j$  through  
2619  $w_j$ . So,

$$\frac{\partial w_j}{\partial x_j} = \frac{\partial w}{\partial x_j} \quad (\text{A20a})$$

$$\frac{\partial w_j}{\partial y_j} = \frac{\partial w}{\partial y_j} \quad (\text{A20b})$$

$$\frac{\partial w_j}{\partial \mathbf{e}_j} = \frac{\partial w}{\partial \mathbf{e}_j} \quad (\text{A20c})$$

2620 which substituted in Eq. (A19) yields

$$\begin{aligned} \frac{dw_j}{dx_{ia}} \Big|_{y=\bar{y}} &= \left[ \frac{d\mathbf{x}_j^\top}{dx_{ia}} \left( \frac{\partial w}{\partial x_j} + \frac{\partial \mathbf{e}_j^\top}{\partial x_j} \frac{\partial w}{\partial \mathbf{e}_j} \right) \right] \Big|_{y=\bar{y}} \\ &= \left( \frac{d\mathbf{x}_j^\top}{dx_{ia}} \frac{\delta w}{\delta x_j} \right) \Big|_{y=\bar{y}}, \end{aligned} \quad (\text{A21})$$

2621 where the *semi-total selection gradient of states at age  $j$*  or, equivalently, the column vector of *semi-total effects of a mutant's states at age  $j$  on fitness* (i.e., the total gradient considering environmental but not developmental constraints) is

$$\frac{\delta w}{\delta x_j} \Big|_{y=\bar{y}} = \left( \frac{\partial w}{\partial x_j} + \frac{\partial \mathbf{e}_j^\top}{\partial x_j} \frac{\partial w}{\partial \mathbf{e}_j} \right) \Big|_{y=\bar{y}} \in \mathbb{R}^{N_s \times 1}. \quad (\text{A22})$$

Consider now the semi-total selection gradient of states for all ages. The block column vector of *semi-total effects of a mutant's states on fitness* is

$$\frac{\delta w}{\delta \mathbf{x}} \Big|_{y=\bar{y}} \equiv \left( \frac{\delta w}{\delta x_1}; \dots; \frac{\delta w}{\delta x_{N_a}} \right) \Big|_{y=\bar{y}} \in \mathbb{R}^{N_a N_s \times 1}.$$

2625 Using Eq. (33d), we have that

$$\frac{\partial \mathbf{e}^\top}{\partial \mathbf{x}} \frac{\partial w}{\partial \mathbf{e}} = \left( \sum_{k=1}^{N_a} \frac{\partial \mathbf{e}_k^\top}{\partial x_j} \frac{\partial w}{\partial \mathbf{e}_k} \right) = \left( \frac{\partial \mathbf{e}_j^\top}{\partial x_j} \frac{\partial w}{\partial \mathbf{e}_j} \right) \quad (\text{A23})$$

2626 is a block column vector whose  $j$ -th entry equals the rightmost  
2627 term in Eq. (A22). Thus, from Eqs. (A22), (30), and (A23), it  
2628 follows that the semi-total selection gradient of states is given  
2629 by Eq. (40).

2630 Now, we write the total selection gradient of  $x_{ia}$  in terms of  
2631 the semi-total selection gradient of states. Substituting Eq. (A21)  
2632 in Eq. (A18) yields

$$\frac{dw}{dx_{ia}} \Big|_{y=\bar{y}} = \sum_{j=1}^{N_a} \left( \frac{d\mathbf{x}_j^\top}{dx_{ia}} \frac{\delta w}{\delta x_j} \right) \Big|_{y=\bar{y}} = \left( \frac{d\mathbf{x}^\top}{dx_{ia}} \frac{\delta w}{\delta \mathbf{x}} \right) \Big|_{y=\bar{y}},$$

2633 where we use the block row vector

$$\frac{d\mathbf{x}^\top}{dx_{ia}} = \left( \frac{d\mathbf{x}_0^\top}{dx_{ia}}, \dots, \frac{d\mathbf{x}_{N_a}^\top}{dx_{ia}} \right) \in \mathbb{R}^{1 \times N_a N_s}.$$

2634 Therefore, the total selection gradient of all state variables across  
2635 all ages is

$$\frac{dw}{d\mathbf{x}} \Big|_{y=\bar{y}} = \left( \frac{d\mathbf{x}^\top}{d\mathbf{x}} \frac{\delta w}{\delta \mathbf{x}} \right) \Big|_{y=\bar{y}} \in \mathbb{R}^{N_a N_s \times 1}, \quad (\text{A24})$$

where the semi-total selection gradient of states is given by  
Eq. (40) and the block matrix of *total effects of a mutant's states on her states* is

$$\frac{d\mathbf{x}^\top}{d\mathbf{x}} \Big|_{y=\bar{y}} \equiv \left( \begin{array}{ccc} \frac{d\mathbf{x}_1^\top}{dx_1} & \dots & \frac{d\mathbf{x}_{N_a}^\top}{dx_1} \\ \vdots & \ddots & \vdots \\ \frac{d\mathbf{x}_1^\top}{dx_{N_a}} & \dots & \frac{d\mathbf{x}_{N_a}^\top}{dx_{N_a}} \end{array} \right) \Big|_{y=\bar{y}} \in \mathbb{R}^{N_a N_s \times N_a N_s}.$$

Using Eq. (40), expression (A24) is now in terms of partial derivatives of fitness, partial derivatives of the environment, and total effects of a mutant's states on her states,  $d\mathbf{x}^\top/d\mathbf{x}$ , which we now proceed to write in terms of partial derivatives only.

#### Matrix of total effects of a mutant's states on her states

From the developmental constraint (8) for the  $k$ -th state variable at age  $j \in \{2, \dots, N_a\}$  we have that  $x_{kj} = g_{k,j-1}(z_{j-1}, \bar{z}, \mathbf{h}_{j-1}(z_{j-1}, \bar{z}, \tau))$ , so using the chain rule since controls are open-loop we obtain

$$\begin{aligned} \frac{dx_{kj}}{dx_{ia}} \Big|_{y=\bar{y}} &= \left( \sum_{l=1}^{N_s} \frac{\partial g_{k,j-1}}{\partial x_{l,j-1}} \frac{dx_{l,j-1}}{dx_{ia}} \right. \\ &\quad \left. + \sum_{l=1}^{N_s} \sum_{r=1}^{N_e} \frac{\partial g_{k,j-1}}{\partial \epsilon_{r,j-1}} \frac{\partial \epsilon_{r,j-1}}{\partial x_{l,j-1}} \frac{dx_{l,j-1}}{dx_{ia}} \right) \Big|_{y=\bar{y}}. \end{aligned}$$

Applying matrix calculus notation (Appendix 14), this is

$$\frac{dx_{kj}}{dx_{ia}} \Big|_{y=\bar{y}} = \left( \frac{d\mathbf{x}_{j-1}^\top}{dx_{ia}} \frac{\partial g_{k,j-1}}{\partial \mathbf{x}_{j-1}} + \sum_{l=1}^{N_s} \frac{\partial \mathbf{e}_{j-1}^\top}{\partial \mathbf{x}_{j-1}} \frac{\partial g_{k,j-1}}{\partial \mathbf{e}_{j-1}} \frac{dx_{l,j-1}}{dx_{ia}} \right) \Big|_{y=\bar{y}}.$$

Applying matrix calculus notation again yields

$$\frac{dx_{kj}}{dx_{ia}} \Big|_{y=\bar{y}} = \left( \frac{d\mathbf{x}_{j-1}^\top}{dx_{ia}} \frac{\partial g_{k,j-1}}{\partial \mathbf{x}_{j-1}} + \frac{d\mathbf{x}_{j-1}^\top}{dx_{ia}} \frac{\partial \mathbf{e}_{j-1}^\top}{\partial \mathbf{x}_{j-1}} \frac{\partial g_{k,j-1}}{\partial \mathbf{e}_{j-1}} \right) \Big|_{y=\bar{y}}.$$

Factorizing, we have

$$\frac{dx_{kj}}{dx_{ia}} \Big|_{y=\bar{y}} = \left[ \frac{d\mathbf{x}_{j-1}^\top}{dx_{ia}} \left( \frac{\partial g_{k,j-1}}{\partial \mathbf{x}_{j-1}} + \frac{\partial \mathbf{e}_{j-1}^\top}{\partial \mathbf{x}_{j-1}} \frac{\partial g_{k,j-1}}{\partial \mathbf{e}_{j-1}} \right) \right] \Big|_{y=\bar{y}}.$$

Rewriting  $g_{k,j-1}$  as  $x_{kj}$  yields

$$\frac{dx_{kj}}{dx_{ia}} \Big|_{y=\bar{y}} = \left[ \frac{d\mathbf{x}_{j-1}^\top}{dx_{ia}} \left( \frac{\partial x_{kj}}{\partial \mathbf{x}_{j-1}} + \frac{\partial \mathbf{e}_{j-1}^\top}{\partial \mathbf{x}_{j-1}} \frac{\partial x_{kj}}{\partial \mathbf{e}_{j-1}} \right) \right] \Big|_{y=\bar{y}}.$$

Hence,

$$\frac{d\mathbf{x}_j^\top}{dx_{ia}} \Big|_{y=\bar{y}} = \left[ \frac{d\mathbf{x}_{j-1}^\top}{dx_{ia}} \left( \frac{\partial \mathbf{x}_j^\top}{\partial \mathbf{x}_{j-1}} + \frac{\partial \mathbf{e}_{j-1}^\top}{\partial \mathbf{x}_{j-1}} \frac{\partial \mathbf{x}_j^\top}{\partial \mathbf{e}_{j-1}} \right) \right] \Big|_{y=\bar{y}}, \quad (\text{A25})$$

where we use the matrix of *direct effects of a mutant's states at age  $j$  on her states at age  $j+1$*

$$\frac{\partial \mathbf{x}_{j+1}^\top}{\partial \mathbf{x}_j} \Big|_{y=\bar{y}} \equiv \left( \begin{array}{ccc} \frac{\partial x_{1,j+1}}{\partial x_{1j}} & \dots & \frac{\partial x_{N_s,j+1}}{\partial x_{1j}} \\ \vdots & \ddots & \vdots \\ \frac{\partial x_{1,j+1}}{\partial x_{N_sj}} & \dots & \frac{\partial x_{N_s,j+1}}{\partial x_{N_sj}} \end{array} \right) \Big|_{y=\bar{y}} \in \mathbb{R}^{N_s \times N_s},$$



2655 and the matrix of direct effects of a mutant's environment at age  $j$  on  
2656 her states at age  $j + 1$

$$\frac{\partial \mathbf{x}_{j+1}^\top}{\partial \boldsymbol{\epsilon}_j} \Big|_{\mathbf{y}=\bar{\mathbf{y}}} \equiv \begin{pmatrix} \frac{\partial x_{1,j+1}}{\partial \epsilon_{1j}} & \cdots & \frac{\partial x_{N_s,j+1}}{\partial \epsilon_{1j}} \\ \vdots & \ddots & \vdots \\ \frac{\partial x_{1,j+1}}{\partial \epsilon_{N_ej}} & \cdots & \frac{\partial x_{N_s,j+1}}{\partial \epsilon_{N_ej}} \end{pmatrix} \Big|_{\mathbf{y}=\bar{\mathbf{y}}} \in \mathbb{R}^{N_e \times N_s}.$$

2657 We can more succinctly write Eq. (A25) as

$$\frac{\mathbf{dx}_j^\top}{\mathbf{dx}_{ia}} \Big|_{\mathbf{y}=\bar{\mathbf{y}}} = \left( \frac{\mathbf{dx}_{j-1}^\top}{\mathbf{dx}_{ia}} \frac{\delta \mathbf{x}_j^\top}{\delta \mathbf{x}_{j-1}} \right) \Big|_{\mathbf{y}=\bar{\mathbf{y}}}, \quad (\text{A26})$$

2658 where we use the matrix of semi-total effects of a mutant's states at  
2659 age  $j$  on her states at age  $j + 1$

$$\frac{\delta \mathbf{x}_{j+1}^\top}{\delta \mathbf{x}_j} \Big|_{\mathbf{y}=\bar{\mathbf{y}}} = \left( \frac{\partial \mathbf{x}_{j+1}^\top}{\partial \mathbf{x}_j} + \frac{\partial \boldsymbol{\epsilon}_j^\top}{\partial \mathbf{x}_j} \frac{\partial \mathbf{x}_{j+1}^\top}{\partial \boldsymbol{\epsilon}_j} \right) \Big|_{\mathbf{y}=\bar{\mathbf{y}}} \in \mathbb{R}^{N_s \times N_s}. \quad (\text{A27})$$

2660 The block matrix of semi-total effects a mutant's states on her  
2661 states is

$$\frac{\delta \mathbf{x}^\top}{\delta \mathbf{x}} \Big|_{\mathbf{y}=\bar{\mathbf{y}}} \equiv \begin{pmatrix} \frac{\delta \mathbf{x}_1^\top}{\delta \mathbf{x}_1} & \cdots & \frac{\delta \mathbf{x}_{N_a}^\top}{\delta \mathbf{x}_1} \\ \vdots & \ddots & \vdots \\ \frac{\delta \mathbf{x}_1^\top}{\delta \mathbf{x}_{N_a}} & \cdots & \frac{\delta \mathbf{x}_{N_a}^\top}{\delta \mathbf{x}_{N_a}} \end{pmatrix} \Big|_{\mathbf{y}=\bar{\mathbf{y}}} \\ = \begin{pmatrix} \mathbf{I} & \frac{\delta \mathbf{x}_2^\top}{\delta \mathbf{x}_1} & \cdots & \mathbf{0} & \mathbf{0} \\ \mathbf{0} & \mathbf{I} & \cdots & \mathbf{0} & \mathbf{0} \\ \vdots & \vdots & \ddots & \vdots & \vdots \\ \mathbf{0} & \mathbf{0} & \cdots & \mathbf{I} & \frac{\delta \mathbf{x}_{N_a}^\top}{\delta \mathbf{x}_{N_a-1}} \\ \mathbf{0} & \mathbf{0} & \cdots & \mathbf{0} & \mathbf{I} \end{pmatrix} \Big|_{\mathbf{y}=\bar{\mathbf{y}}} \quad (\text{A28}) \\ \in \mathbb{R}^{N_a N_s \times N_a N_s}.$$

2662 The equality (A28) follows because semi-total effects of a mutant's  
2663 states on her states are only non-zero at the next age (from  
2664 the developmental constraint (8)) or when a variable is differentiated  
2665 with respect to itself. Using Eqs. (33d) and (33c), we have that  
2666

$$\frac{\partial \boldsymbol{\epsilon}^\top}{\partial \mathbf{x}} \frac{\partial \mathbf{x}^\top}{\partial \boldsymbol{\epsilon}} = \left( \sum_{k=1}^{N_a} \frac{\partial \boldsymbol{\epsilon}_k^\top}{\partial \mathbf{x}_a} \frac{\partial \mathbf{x}_j^\top}{\partial \boldsymbol{\epsilon}_k} \right) = \begin{pmatrix} \frac{\partial \boldsymbol{\epsilon}_a^\top}{\partial \mathbf{x}_a} \frac{\partial \mathbf{x}_j^\top}{\partial \boldsymbol{\epsilon}_a} & \text{for } j = a + 1 \\ \mathbf{0} & \text{for } j \neq a + 1 \end{pmatrix}, \quad (\text{A29})$$

2667 which equals the rightmost term in Eq. (A27) for  $j = a + 1$ . Thus,  
2668 from Eqs. (A27), (33a), (A28), and (A29), it follows that the block  
2669 matrix of semi-total effects of a mutant's states on her states  
2670 satisfies Eq. (42).

2671 Eq. (A26) gives the matrix of total effects of a mutant's  $i$ -th  
2672 state at age  $a$  on her states at age  $j$ . Then, it follows that the  
2673 matrix of total effects of all of a mutant's states at age  $a$  on her  
2674 states at age  $j$  is

$$\frac{\mathbf{dx}_j^\top}{\mathbf{dx}_a} \Big|_{\mathbf{y}=\bar{\mathbf{y}}} = \left( \frac{\mathbf{dx}_{j-1}^\top}{\mathbf{dx}_a} \frac{\delta \mathbf{x}_j^\top}{\delta \mathbf{x}_{j-1}} \right) \Big|_{\mathbf{y}=\bar{\mathbf{y}}}. \quad (\text{A30})$$

Eq. (A30) is a recurrence equation for  $\mathbf{dx}_j^\top / \mathbf{dx}_a$  over age  $j \in$   
2675  $\{2, \dots, N_a\}$ . Because of the arrow of developmental time (due to  
2676 the developmental constraint (8)), perturbations in an individual's  
2677 late state variables do not affect the individual's early state  
2678 variables (i.e.,  $\mathbf{dx}_j^\top / \mathbf{dx}_a = \mathbf{0}$  for  $j < a$  and  $j \in \{1, \dots, N_a - 1\}$ ).  
2679 Additionally, from the arrow of developmental time (Eq. 8), a  
2680 perturbation in an individual's state variable at a given age  
2681 does not affect any other of the individual's state variables at  
2682 the same age (i.e.,  $\mathbf{dx}_a^\top / \mathbf{dx}_a = \mathbf{I}$  where  $\mathbf{I}$  is the identity matrix).  
2683 Hence, expanding the recurrence in Eq. (A30), we obtain for  
2684  $j \in \{1, \dots, N_a\}$  that  
2685

$$\frac{\mathbf{dx}_j^\top}{\mathbf{dx}_a} \Big|_{\mathbf{y}=\bar{\mathbf{y}}} = \begin{cases} \left( \frac{\mathbf{dx}_a^\top}{\mathbf{dx}_a} \frac{\delta \mathbf{x}_{a+1}^\top}{\delta \mathbf{x}_a} \cdots \frac{\delta \mathbf{x}_j^\top}{\delta \mathbf{x}_{j-1}} \right) \Big|_{\mathbf{y}=\bar{\mathbf{y}}} & \text{for } j > a \\ \frac{\mathbf{dx}_a^\top}{\mathbf{dx}_a} \Big|_{\mathbf{y}=\bar{\mathbf{y}}} & \text{for } j = a \\ \mathbf{0} & \text{for } j < a \end{cases} \\ = \begin{cases} \left( \frac{\delta \mathbf{x}_{a+1}^\top}{\delta \mathbf{x}_a} \cdots \frac{\delta \mathbf{x}_j^\top}{\delta \mathbf{x}_{j-1}} \right) \Big|_{\mathbf{y}=\bar{\mathbf{y}}} & \text{for } j > a \\ \mathbf{I} & \text{for } j = a \\ \mathbf{0} & \text{for } j < a. \end{cases} \quad (\text{A31})$$

2686 Thus, the block matrix of total effects of a mutant's states on her  
2687 states is

$$\frac{\mathbf{dx}^\top}{\mathbf{dx}} \Big|_{\mathbf{y}=\bar{\mathbf{y}}} = \begin{pmatrix} \frac{\mathbf{dx}_1^\top}{\mathbf{dx}_1} & \cdots & \frac{\mathbf{dx}_{N_a}^\top}{\mathbf{dx}_1} \\ \vdots & \ddots & \vdots \\ \frac{\mathbf{dx}_1^\top}{\mathbf{dx}_{N_a}} & \cdots & \frac{\mathbf{dx}_{N_a}^\top}{\mathbf{dx}_{N_a}} \end{pmatrix} \Big|_{\mathbf{y}=\bar{\mathbf{y}}} \\ = \begin{pmatrix} \mathbf{I} & \frac{\mathbf{dx}_2^\top}{\mathbf{dx}_1} & \cdots & \frac{\mathbf{dx}_{N_a-1}^\top}{\mathbf{dx}_1} & \frac{\mathbf{dx}_{N_a}^\top}{\mathbf{dx}_1} \\ \mathbf{0} & \mathbf{I} & \cdots & \frac{\mathbf{dx}_{N_a-1}^\top}{\mathbf{dx}_2} & \frac{\mathbf{dx}_{N_a}^\top}{\mathbf{dx}_2} \\ \vdots & \vdots & \ddots & \vdots & \vdots \\ \mathbf{0} & \mathbf{0} & \cdots & \mathbf{I} & \frac{\mathbf{dx}_{N_a}^\top}{\mathbf{dx}_{N_a-1}} \\ \mathbf{0} & \mathbf{0} & \cdots & \mathbf{0} & \mathbf{I} \end{pmatrix} \Big|_{\mathbf{y}=\bar{\mathbf{y}}} \quad (\text{A32}) \\ \in \mathbb{R}^{N_a N_s \times N_a N_s},$$

2688 which is block upper triangular and its  $aj$ -th entry is given by

$$\frac{\mathbf{dx}_j^\top}{\mathbf{dx}_a} = \begin{cases} \prod_{k=a}^{j-1} \frac{\delta \mathbf{x}_{k+1}^\top}{\delta \mathbf{x}_k} = \frac{\delta \mathbf{x}_{a+1}^\top}{\delta \mathbf{x}_a} \cdots \frac{\delta \mathbf{x}_j^\top}{\delta \mathbf{x}_{j-1}} & \text{for } j > a \\ \mathbf{I} & \text{for } j = a \\ \mathbf{0} & \text{for } j < a. \end{cases} \quad (\text{A33})$$

2689 Since matrix multiplication is not commutative, the  $\curvearrowright$  denotes  
2690 right multiplication. Eqs. (A32) and (A33) write the matrix of  
2691 total effects of a mutant's states on her states in terms of partial  
2692 derivatives, given Eq. (A27), as we sought.  
2693

2694 <sup>1</sup> More specifically, we take the derivative  $\mathbf{dx}_j^\top / \mathbf{dx}_{ia}$  as referring to the effect on  $\mathbf{x}_j^\top$   
of a perturbation of the initial condition  $\mathbf{x}_a$  of the difference equation (8) applied  
at the ages  $\{a, \dots, n\}$ . Hence, if  $j < a$ ,  $\mathbf{x}_j^\top$  is unmodified by a change in the initial  
condition of (8) applied at the ages  $\{a, \dots, n\}$ .

2693 From Eq. (A32), it follows that the matrix of total effects of a  
 2694 mutant's states on her states  $\frac{dx^T}{dx}|_{y=\bar{y}}$  is invertible. Indeed,  
 2695 since  $\frac{dx^T}{dx}|_{y=\bar{y}}$  is square and block upper triangular, then its  
 2696 determinant is

$$\det \left( \frac{dx^T}{dx} \Big|_{y=\bar{y}} \right) = \det \left( \frac{dx_1^T}{dx_1} \Big|_{y=\bar{y}} \right) \cdots \det \left( \frac{dx_{N_a}^T}{dx_{N_a}} \Big|_{y=\bar{y}} \right)$$

2697 (Horn and Johnson 2013, p. 32). Since  $\frac{dx_a^T}{dx_a}|_{y=\bar{y}} = \mathbf{I}$ ,  
 2698 then  $\det(\frac{dx_a^T}{dx_a}|_{y=\bar{y}}) = 1$  for all  $a \in \{1, \dots, N_a\}$ . Hence,  
 2699  $\det(\frac{dx^T}{dx}|_{y=\bar{y}}) \neq 0$ , so  $\frac{dx^T}{dx}|_{y=\bar{y}}$  is invertible.

2700 We now obtain a more compact expression for the matrix of  
 2701 total effects of a mutant's states on her states in terms of partial  
 2702 derivatives. From Eq. (A28), it follows that

$$\frac{\delta x^T}{\delta x} \Big|_{y=\bar{y}} - \mathbf{I} = \begin{pmatrix} 0 & \frac{\delta x_2^T}{\delta x_1} & \cdots & 0 & 0 \\ 0 & 0 & \cdots & 0 & 0 \\ \vdots & \vdots & \ddots & \vdots & \vdots \\ 0 & 0 & \cdots & 0 & \frac{\delta x_{N_a}^T}{\delta x_{N_a-1}} \\ 0 & 0 & \cdots & 0 & 0 \end{pmatrix} \Big|_{y=\bar{y}}, \quad (\text{A34})$$

2703 which is block 1-superdiagonal (i.e., only the entries in its first  
 2704 block super diagonal are non-zero). By definition of matrix  
 2705 power, we have that  $(\frac{\delta x^T}{\delta x} - \mathbf{I})^0 = \mathbf{I}$ . Now, from Eq. (A34),  
 2706 we have that

$$\frac{\delta x^T}{\delta x} - \mathbf{I} = \begin{pmatrix} \frac{\delta x_j^T}{\delta x_a} & \text{if } j = a + 1 \\ 0 & \text{otherwise} \end{pmatrix}.$$

2707 Using Eq. (A34), taking the second power yields

$$\begin{aligned} \left( \frac{\delta x^T}{\delta x} - \mathbf{I} \right)^2 &= \left( \frac{\delta x^T}{\delta x} - \mathbf{I} \right) \left( \frac{\delta x^T}{\delta x} - \mathbf{I} \right) \\ &= \begin{pmatrix} \frac{\delta x_{a+1}^T}{\delta x_a} \frac{\delta x_j^T}{\delta x_{a+1}} & \text{if } j = a + 2 \\ 0 & \text{otherwise} \end{pmatrix}, \end{aligned}$$

2708 which is block 2-superdiagonal. This suggests the inductive  
 2709 hypothesis that

$$\left( \frac{\delta x^T}{\delta x} - \mathbf{I} \right)^i = \begin{pmatrix} \prod_{k=a}^{j-1} \frac{\delta x_{k+1}^T}{\delta x_k} & \text{if } j = a + i \\ 0 & \text{otherwise} \end{pmatrix} \quad (\text{A35})$$

2710 holds for some  $i \in \{0, 1, \dots\}$ , which is a block  $i$ -superdiagonal  
 2711 matrix. If this is the case, then we have that

$$\begin{aligned} \left( \frac{\delta x^T}{\delta x} - \mathbf{I} \right)^{i+1} &= \left( \frac{\delta x^T}{\delta x} - \mathbf{I} \right)^i \left( \frac{\delta x^T}{\delta x} - \mathbf{I} \right) \\ &= \begin{pmatrix} \prod_{k=a}^{a+i-1} \frac{\delta x_{k+1}^T}{\delta x_k} \frac{\delta x_j^T}{\delta x_{a+i}} & \text{if } j = a + i + 1 \\ 0 & \text{otherwise} \end{pmatrix} \\ &= \begin{pmatrix} \prod_{k=a}^{j-1} \frac{\delta x_{k+1}^T}{\delta x_k} & \text{if } j = a + i + 1 \\ 0 & \text{otherwise} \end{pmatrix}. \end{aligned}$$

2712 This proves by induction that Eq. (A35) holds for every  $i \in$   
 2713  $\{0, 1, \dots\}$ , which together with Eq. (A33) proves that

$$\left( \frac{\delta x^T}{\delta x} - \mathbf{I} \right)^i = \begin{pmatrix} \frac{dx_j^T}{dx_a} & \text{if } j = a + i \\ 0 & \text{otherwise} \end{pmatrix}$$

2714 holds for all  $i \in \{0, 1, \dots, N_a\}$ . Evaluating this result at various  
 2715  $i$ , note that

$$\left( \frac{\delta x^T}{\delta x} - \mathbf{I} \right)^0 = \begin{pmatrix} \frac{dx_j^T}{dx_a} & \text{if } j = a \\ 0 & \text{otherwise} \end{pmatrix} = \begin{pmatrix} \mathbf{I} & \text{if } j = a \\ 0 & \text{otherwise} \end{pmatrix}$$

2716 is a block matrix of zeros except in its block main diagonal which  
 2717 coincides with the block main diagonal of Eq. (A32). Similarly,

$$\left( \frac{\delta x^T}{\delta x} - \mathbf{I} \right)^1 = \begin{pmatrix} \frac{dx_{a+1}^T}{dx_a} & \text{if } j = a + 1 \\ 0 & \text{otherwise} \end{pmatrix}$$

2718 is a block matrix of zeros except in its first block super diagonal  
 2719 which coincides with the first block super diagonal of Eq. (A32).  
 2720 Indeed,

$$\left( \frac{\delta x^T}{\delta x} - \mathbf{I} \right)^i = \begin{pmatrix} \frac{dx_{a+i}^T}{dx_a} & \text{if } j = a + i \\ 0 & \text{otherwise} \end{pmatrix}$$

2721 is a block matrix of zeros except in its  $i$ -th block super diagonal  
 2722 which coincides with the  $i$ -th block super diagonal of Eq. (A32)  
 2723 for all  $i \in \{1, \dots, N_a - 1\}$ . Therefore, since any non-zero entry  
 2724 of the matrix  $(\frac{\delta x^T}{\delta x} - \mathbf{I})^i$  corresponds to a zero entry for the  
 2725 matrix  $(\frac{\delta x^T}{\delta x} - \mathbf{I})^j$  for any  $i \neq j$  with  $i, j \in \{0, \dots, N_a - 1\}$ , it  
 2726 follows that

$$\frac{dx^T}{dx} = \sum_{i=0}^{N_a-1} \left( \frac{\delta x^T}{\delta x} - \mathbf{I} \right)^i. \quad (\text{A36})$$

2727 From the geometric series of matrices we have that

$$\begin{aligned} \sum_{i=0}^{N_a-1} \left( \frac{\delta x^T}{\delta x} - \mathbf{I} \right)^i &= \left[ \mathbf{I} - \left( \frac{\delta x^T}{\delta x} - \mathbf{I} \right) \right]^{-1} \left[ \mathbf{I} - \left( \frac{\delta x^T}{\delta x} - \mathbf{I} \right)^{N_a} \right] \\ &= \left( 2\mathbf{I} - \frac{\delta x^T}{\delta x} \right)^{-1}. \end{aligned} \quad (\text{A37})$$

2728 The last equality follows because  $\frac{\delta x^T}{\delta x} - \mathbf{I}$  is strictly block  
 2729 triangular with block dimension  $N_a$  and so  $\frac{\delta x^T}{\delta x} - \mathbf{I}$  is nilpotent  
 2730 with index smaller than or equal to  $N_a$ , which implies that  
 2731  $(\frac{\delta x^T}{\delta x} - \mathbf{I})^{N_a} = \mathbf{0}$ . From Eq. (A28), the matrix  $2\mathbf{I} - \frac{\delta x^T}{\delta x}$  is  
 2732 block upper triangular with only identity matrices in its block  
 2733 main diagonal, so all the eigenvalues of  $2\mathbf{I} - \frac{\delta x^T}{\delta x}$  equal one  
 2734 and the matrix is invertible; thus, the inverse matrix in Eq. (A37)  
 2735 exists. Finally, using Eq. (A37) in (A36) yields (44), which is a  
 2736 compact expression for the matrix of total effects of a mutant's  
 2737 states on her states in terms of partial derivatives only, once  
 2738 Eq. (42) is used.

## 2739 Conclusion

**Form 1** Using Eqs. (A24) and (40) for  $\zeta = x$ , we have that the  
 total selection gradient of states is

$$\frac{dw}{dx} \Big|_{y=\bar{y}} = \left[ \frac{dx^T}{dx} \left( \frac{\partial w}{\partial x} + \frac{\partial \epsilon^T}{\partial x} \frac{\partial w}{\partial \epsilon} \right) \right] \Big|_{y=\bar{y}}.$$

2740 Thus, using Eq. (49) yields the first line of Eq. (63).

2741 **Form 2** Using Eq. (A24), the total selection gradient of states is  
2742 given by the second line of Eq. (63).

2743 **Form 3** Using Eqs. (A24), (40) for  $\zeta = \mathbf{z}$ , and (53), we have that  
2744 the total selection gradient of states is given by the third line of  
2745 Eq. (63), where the semi-total selection gradient of the phenotype is

$$\frac{\delta w}{\delta \mathbf{z}} \Big|_{\mathbf{y}=\bar{\mathbf{y}}} \equiv \left( \begin{array}{c} \frac{\delta w}{\delta \mathbf{x}} \\ \frac{\delta w}{\delta \mathbf{y}} \end{array} \right) \Big|_{\mathbf{y}=\bar{\mathbf{y}}} \in \mathbb{R}^{N_a(N_s+N_c) \times 1}. \quad (\text{A38})$$

2746 **Form 4** Finally, using the first line of Eqs. (63) and (56), we obtain  
2747 the fourth line of Eq. (63).

## 2748 Appendix 5: total selection gradient of controls

### 2749 Total selection gradient of controls in terms of direct fitness effects

2750 Here we derive the total selection gradient of controls following  
2751 an analogous procedure to the one used in Appendix 4 for the  
2752 total selection gradient of states. For the  $i$ -th control variable at  
2753 age  $a$ , letting  $\zeta$  in Eq. (27) be  $y_{ia}$ , we have

$$\frac{d\lambda}{dy_{ia}} \Big|_{\mathbf{y}=\bar{\mathbf{y}}} = \frac{dw}{dy_{ia}} \Big|_{\mathbf{y}=\bar{\mathbf{y}}} = \sum_{j=1}^{N_a} \frac{dw_j}{dy_{ia}} \Big|_{\mathbf{y}=\bar{\mathbf{y}}}. \quad (\text{A39})$$

2755 The total derivatives of a mutant's relative fitness at age  $j$  in  
2756 Eq. (A39) are with respect to the individual's control variables  
2757 at possibly another age  $a$ . We now seek to express such selection  
2758 gradient entry in terms of partial derivatives only.

2759 From Eq. (24), we have  $w_j(\mathbf{z}_j, \bar{\mathbf{z}}, \mathbf{h}_j(\mathbf{z}_j, \bar{\mathbf{z}}, \tau))$  and  $\mathbf{z}_j = (\mathbf{x}_j; \mathbf{y}_j)$ ,  
2760 so applying the chain rule, we obtain

$$\begin{aligned} \frac{dw_j}{dy_{ia}} \Big|_{\mathbf{y}=\bar{\mathbf{y}}} &= \left( \sum_{k=1}^{N_s} \frac{\partial w_j}{\partial x_{kj}} \frac{dx_{kj}}{dy_{ia}} + \sum_{k=1}^{N_c} \frac{\partial w_j}{\partial y_{kj}} \frac{dy_{kj}}{dy_{ia}} \right. \\ &\quad + \sum_{k=1}^{N_s} \sum_{r=1}^{N_c} \frac{\partial w_j}{\partial \epsilon_{rj}} \frac{\partial \epsilon_{rj}}{\partial x_{kj}} \frac{dx_{kj}}{dy_{ia}} \\ &\quad \left. + \sum_{k=1}^{N_c} \sum_{r=1}^{N_c} \frac{\partial w_j}{\partial \epsilon_{rj}} \frac{\partial \epsilon_{rj}}{\partial y_{kj}} \frac{dy_{kj}}{dy_{ia}} \right) \Big|_{\mathbf{y}=\bar{\mathbf{y}}}. \end{aligned}$$

2761 Applying matrix calculus notation (Appendix 14), this is

$$\begin{aligned} \frac{dw_j}{dy_{ia}} \Big|_{\mathbf{y}=\bar{\mathbf{y}}} &= \left( \frac{d\mathbf{x}_j^T}{dy_{ia}} \frac{\partial w_j}{\partial \mathbf{x}_j} + \frac{d\mathbf{y}_j^T}{dy_{ia}} \frac{\partial w_j}{\partial \mathbf{y}_j} + \sum_{k=1}^{N_s} \frac{\partial \mathbf{e}_j^T}{\partial x_{kj}} \frac{\partial w_j}{\partial \mathbf{e}_j} \frac{dx_{kj}}{dy_{ia}} \right. \\ &\quad \left. + \sum_{k=1}^{N_c} \frac{\partial \mathbf{e}_j^T}{\partial y_{kj}} \frac{\partial w_j}{\partial \mathbf{e}_j} \frac{dy_{kj}}{dy_{ia}} \right) \Big|_{\mathbf{y}=\bar{\mathbf{y}}}. \end{aligned}$$

2762 Applying matrix calculus notation again yields

$$\begin{aligned} \frac{dw_j}{dy_{ia}} \Big|_{\mathbf{y}=\bar{\mathbf{y}}} &= \left( \frac{d\mathbf{x}_j^T}{dy_{ia}} \frac{\partial w_j}{\partial \mathbf{x}_j} + \frac{d\mathbf{y}_j^T}{dy_{ia}} \frac{\partial w_j}{\partial \mathbf{y}_j} + \frac{d\mathbf{x}_j^T}{dy_{ia}} \frac{\partial \mathbf{e}_j^T}{\partial \mathbf{x}_j} \frac{\partial w_j}{\partial \mathbf{e}_j} \right. \\ &\quad \left. + \frac{d\mathbf{y}_j^T}{dy_{ia}} \frac{\partial \mathbf{e}_j^T}{\partial \mathbf{y}_j} \frac{\partial w_j}{\partial \mathbf{e}_j} \right) \Big|_{\mathbf{y}=\bar{\mathbf{y}}}. \end{aligned}$$

2763 Factorizing, we have

$$\frac{dw_j}{dy_{ia}} \Big|_{\mathbf{y}=\bar{\mathbf{y}}} = \left[ \frac{d\mathbf{x}_j^T}{dy_{ia}} \left( \frac{\partial w_j}{\partial \mathbf{x}_j} + \frac{\partial \mathbf{e}_j^T}{\partial \mathbf{x}_j} \frac{\partial w_j}{\partial \mathbf{e}_j} \right) \right]$$

$$+ \frac{d\mathbf{y}_j^T}{dy_{ia}} \left( \frac{\partial w_j}{\partial \mathbf{y}_j} + \frac{\partial \mathbf{e}_j^T}{\partial \mathbf{y}_j} \frac{\partial w_j}{\partial \mathbf{e}_j} \right) \Big|_{\mathbf{y}=\bar{\mathbf{y}}}. \quad (\text{A40})$$

We now write Eq. (A40) in terms of partial derivatives of  
lifetime fitness. Consider the selection gradient of controls at age  $j$   
or, equivalently, the column vector of direct effects of a mutant's  
controls at age  $j$  on fitness

$$\frac{\partial w}{\partial \mathbf{y}_j} \Big|_{\mathbf{y}=\bar{\mathbf{y}}} \equiv \left( \frac{\partial w}{\partial y_{1j}}, \dots, \frac{\partial w}{\partial y_{N_cj}} \right)^T \Big|_{\mathbf{y}=\bar{\mathbf{y}}} \in \mathbb{R}^{N_c \times 1},$$

and the matrix of direct effects of a mutant's controls at age  $j$  on her  
environment at age  $j$

$$\frac{\partial \mathbf{e}_j^T}{\partial \mathbf{y}_j} \Big|_{\mathbf{y}=\bar{\mathbf{y}}} \equiv \left( \begin{array}{ccc} \frac{\partial \epsilon_{1j}}{\partial y_{1j}} & \dots & \frac{\partial \epsilon_{N_cj}}{\partial y_{1j}} \\ \vdots & \ddots & \vdots \\ \frac{\partial \epsilon_{1j}}{\partial y_{N_cj}} & \dots & \frac{\partial \epsilon_{N_cj}}{\partial y_{N_cj}} \end{array} \right) \Big|_{\mathbf{y}=\bar{\mathbf{y}}} \in \mathbb{R}^{N_c \times N_c}.$$

Using Eqs. (A20) and (A22) in Eq. (A40) yields

$$\begin{aligned} \frac{dw_j}{dy_{ia}} \Big|_{\mathbf{y}=\bar{\mathbf{y}}} &= \left[ \frac{d\mathbf{x}_j^T}{dy_{ia}} \left( \frac{\partial w}{\partial \mathbf{x}_j} + \frac{\partial \mathbf{e}_j^T}{\partial \mathbf{x}_j} \frac{\partial w}{\partial \mathbf{e}_j} \right) \right. \\ &\quad \left. + \frac{d\mathbf{y}_j^T}{dy_{ia}} \left( \frac{\partial w}{\partial \mathbf{y}_j} + \frac{\partial \mathbf{e}_j^T}{\partial \mathbf{y}_j} \frac{\partial w}{\partial \mathbf{e}_j} \right) \right] \Big|_{\mathbf{y}=\bar{\mathbf{y}}} \\ &= \left( \frac{d\mathbf{x}_j^T}{dy_{ia}} \frac{\delta w}{\delta \mathbf{x}_j} + \frac{d\mathbf{y}_j^T}{dy_{ia}} \frac{\delta w}{\delta \mathbf{y}_j} \right) \Big|_{\mathbf{y}=\bar{\mathbf{y}}}, \quad (\text{A41}) \end{aligned}$$

where we use the semi-total selection gradient of controls at age  $j$  or,  
equivalently, the semi-total effects of a mutant's controls at age  $j$  on  
fitness

$$\frac{\delta w}{\delta \mathbf{y}_j} \Big|_{\mathbf{y}=\bar{\mathbf{y}}} = \left( \frac{\partial w}{\partial \mathbf{y}_j} + \frac{\partial \mathbf{e}_j^T}{\partial \mathbf{y}_j} \frac{\partial w}{\partial \mathbf{e}_j} \right) \Big|_{\mathbf{y}=\bar{\mathbf{y}}} \in \mathbb{R}^{N_c \times 1}. \quad (\text{A42})$$

Consider now the semi-total selection gradient of controls for  
all ages. The semi-total selection gradient of controls or, equivalently,  
the block column vector of semi-total effects of a mutant's controls  
on fitness is

$$\frac{\delta w}{\delta \mathbf{y}} \Big|_{\mathbf{y}=\bar{\mathbf{y}}} \equiv \left( \frac{\delta w}{\delta \mathbf{y}_1}; \dots; \frac{\delta w}{\delta \mathbf{y}_{N_a}} \right) \Big|_{\mathbf{y}=\bar{\mathbf{y}}} \in \mathbb{R}^{N_a N_c \times 1}.$$

Using Eq. (33d), we have that

$$\frac{\partial \mathbf{e}^T}{\partial \mathbf{y}} \frac{\partial w}{\partial \mathbf{e}} = \left( \sum_{k=1}^{N_a} \frac{\partial \mathbf{e}_k^T}{\partial \mathbf{y}_j} \frac{\partial w}{\partial \mathbf{e}_k} \right) = \left( \frac{\partial \mathbf{e}_j^T}{\partial \mathbf{y}_j} \frac{\partial w}{\partial \mathbf{e}_j} \right) \quad (\text{A43})$$

is a block column vector whose  $j$ -th entry is the rightmost term  
in Eq. (A42). Thus, from Eqs. (A42), (31), and (A43), it follows  
that the semi-total selection gradient of controls satisfies Eq. (40).

Now, we write the total selection gradient of  $y_{ia}$  in terms  
of the semi-total selection gradient of controls. Substituting  
Eq. (A41) in Eq. (A39) yields

$$\frac{dw}{dy_{ia}} \Big|_{\mathbf{y}=\bar{\mathbf{y}}} = \sum_{j=1}^{N_a} \left( \frac{d\mathbf{x}_j^T}{dy_{ia}} \frac{\delta w}{\delta \mathbf{x}_j} + \frac{d\mathbf{y}_j^T}{dy_{ia}} \frac{\delta w}{\delta \mathbf{y}_j} \right) \Big|_{\mathbf{y}=\bar{\mathbf{y}}}$$

$$= \left( \frac{dx^\top}{dy_{ia}} \frac{\delta w}{\delta x} + \frac{dy^\top}{dy_{ia}} \frac{\delta w}{\delta y} \right) \Big|_{y=\bar{y}},$$

2785 where we use the block row vectors

$$\frac{dx^\top}{dy_{ia}} \equiv \left( \frac{dx_1^\top}{dy_{ia}}, \dots, \frac{dx_{N_a}^\top}{dy_{ia}} \right) \in \mathbb{R}^{1 \times N_a N_s}$$

$$\frac{dy^\top}{dy_{ia}} \equiv \left( \frac{dy_1^\top}{dy_{ia}}, \dots, \frac{dy_{N_a}^\top}{dy_{ia}} \right) \in \mathbb{R}^{1 \times N_a N_c}.$$

2786 Therefore, the total selection gradient of all control variables  
2787 across all ages is

$$\frac{dw}{dy} \Big|_{y=\bar{y}} = \left( \frac{dx^\top}{dy} \frac{\delta w}{\delta x} + \frac{dy^\top}{dy} \frac{\delta w}{\delta y} \right) \Big|_{y=\bar{y}} \in \mathbb{R}^{N_a N_s \times 1}, \quad (\text{A44})$$

2788 where we use the block matrix of *total effects of a mutant's controls*  
2789 *on her states*

$$\frac{dx^\top}{dy} \Big|_{y=\bar{y}} \equiv \left( \begin{array}{ccc} \frac{dx_1^\top}{dy_1} & \dots & \frac{dx_{N_a}^\top}{dy_1} \\ \vdots & \ddots & \vdots \\ \frac{dx_1^\top}{dy_{N_a}} & \dots & \frac{dx_{N_a}^\top}{dy_{N_a}} \end{array} \right) \Big|_{y=\bar{y}} \in \mathbb{R}^{N_a N_c \times N_a N_s},$$

2790 and the block matrix of *total effects of a mutant's controls on her*  
2791 *controls*

$$\frac{dy^\top}{dy} \Big|_{y=\bar{y}} \equiv \left( \begin{array}{ccc} \frac{dy_1^\top}{dy_1} & \dots & \frac{dy_{N_a}^\top}{dy_1} \\ \vdots & \ddots & \vdots \\ \frac{dy_1^\top}{dy_{N_a}} & \dots & \frac{dy_{N_a}^\top}{dy_{N_a}} \end{array} \right) \Big|_{y=\bar{y}} \in \mathbb{R}^{N_a N_c \times N_a N_c}.$$

2792 Expression (A44) is now in terms of partial derivatives of fitness,  
2793 partial derivatives of the environment, total effects of a mutant's  
2794 controls on her states,  $dx^\top/dy$ , and total effects of a mutant's  
2795 controls on her controls,  $dy^\top/dy$ , once Eq. (40) is used. We  
2796 now proceed to write  $dx^\top/dy$  and  $dy^\top/dy$  in terms of partial  
2797 derivatives only.

2798 **Matrix of total effects of a mutant's controls on her states and**  
2799 **her controls**

2800 From the developmental constraint (8) for the  $k$ -th state  
2801 variable at age  $j \in \{2, \dots, N_a\}$  we have that  $x_{kj} =$   
2802  $g_{k,j-1}(\mathbf{z}_{j-1}, \bar{\mathbf{z}}, \mathbf{h}_{j-1}(\mathbf{z}_{j-1}, \bar{\mathbf{z}}, \tau))$ , so using the chain rule we obtain

$$\begin{aligned} \frac{dx_{kj}}{dy_{ia}} \Big|_{y=\bar{y}} &= \left( \sum_{l=1}^{N_s} \frac{\partial g_{k,j-1}}{\partial x_{l,j-1}} \frac{dx_{l,j-1}}{dy_{ia}} + \sum_{l=1}^{N_c} \frac{\partial g_{k,j-1}}{\partial y_{l,j-1}} \frac{dy_{l,j-1}}{dy_{ia}} \right. \\ &+ \sum_{l=1}^{N_s} \sum_{r=1}^{N_c} \frac{\partial g_{k,j-1}}{\partial \epsilon_{r,j-1}} \frac{\partial \epsilon_{r,j-1}}{\partial x_{l,j-1}} \frac{dx_{l,j-1}}{dy_{ia}} \\ &\left. + \sum_{l=1}^{N_c} \sum_{r=1}^{N_c} \frac{\partial g_{k,j-1}}{\partial \epsilon_{r,j-1}} \frac{\partial \epsilon_{r,j-1}}{\partial y_{l,j-1}} \frac{dy_{l,j-1}}{dy_{ia}} \right) \Big|_{y=\bar{y}}. \end{aligned}$$

2803 Applying matrix calculus notation (Appendix 14), this is

$$\frac{dx_{kj}}{dy_{ia}} \Big|_{y=\bar{y}} = \left( \frac{dx_{j-1}^\top}{dy_{ia}} \frac{\partial g_{k,j-1}}{\partial \mathbf{x}_{j-1}} + \frac{dy_{j-1}^\top}{dy_{ia}} \frac{\partial g_{k,j-1}}{\partial \mathbf{y}_{j-1}} \right)$$

$$+ \sum_{l=1}^{N_s} \frac{\partial \boldsymbol{\epsilon}_{j-1}^\top}{\partial x_{l,j-1}} \frac{\partial g_{k,j-1}}{\partial \boldsymbol{\epsilon}_{j-1}} \frac{dx_{l,j-1}}{dy_{ia}} + \sum_{l=1}^{N_c} \frac{\partial \boldsymbol{\epsilon}_{j-1}^\top}{\partial y_{l,j-1}} \frac{\partial g_{k,j-1}}{\partial \boldsymbol{\epsilon}_{j-1}} \frac{dy_{l,j-1}}{dy_{ia}} \Big|_{y=\bar{y}}.$$

Applying matrix calculus notation again yields

$$\begin{aligned} \frac{dx_{kj}}{dy_{ia}} \Big|_{y=\bar{y}} &= \left( \frac{dx_{j-1}^\top}{dy_{ia}} \frac{\partial g_{k,j-1}}{\partial \mathbf{x}_{j-1}} + \frac{dy_{j-1}^\top}{dy_{ia}} \frac{\partial g_{k,j-1}}{\partial \mathbf{y}_{j-1}} \right. \\ &+ \frac{dx_{j-1}^\top}{dy_{ia}} \frac{\partial \boldsymbol{\epsilon}_{j-1}^\top}{\partial \mathbf{x}_{j-1}} \frac{\partial g_{k,j-1}}{\partial \boldsymbol{\epsilon}_{j-1}} \\ &\left. + \frac{dy_{j-1}^\top}{dy_{ia}} \frac{\partial \boldsymbol{\epsilon}_{j-1}^\top}{\partial \mathbf{y}_{j-1}} \frac{\partial g_{k,j-1}}{\partial \boldsymbol{\epsilon}_{j-1}} \right) \Big|_{y=\bar{y}}. \end{aligned}$$

Factorizing, we have

$$\begin{aligned} \frac{dx_{kj}}{dy_{ia}} \Big|_{y=\bar{y}} &= \left[ \frac{dx_{j-1}^\top}{dy_{ia}} \left( \frac{\partial g_{k,j-1}}{\partial \mathbf{x}_{j-1}} + \frac{\partial \boldsymbol{\epsilon}_{j-1}^\top}{\partial \mathbf{x}_{j-1}} \frac{\partial g_{k,j-1}}{\partial \boldsymbol{\epsilon}_{j-1}} \right) \right. \\ &\left. + \frac{dy_{j-1}^\top}{dy_{ia}} \left( \frac{\partial g_{k,j-1}}{\partial \mathbf{y}_{j-1}} + \frac{\partial \boldsymbol{\epsilon}_{j-1}^\top}{\partial \mathbf{y}_{j-1}} \frac{\partial g_{k,j-1}}{\partial \boldsymbol{\epsilon}_{j-1}} \right) \right] \Big|_{y=\bar{y}}. \end{aligned}$$

Rewriting  $g_{k,j-1}$  as  $x_{kj}$  yields

$$\begin{aligned} \frac{dx_{kj}}{dy_{ia}} \Big|_{y=\bar{y}} &= \left[ \frac{dx_{j-1}^\top}{dy_{ia}} \left( \frac{\partial x_{kj}}{\partial \mathbf{x}_{j-1}} + \frac{\partial \boldsymbol{\epsilon}_{j-1}^\top}{\partial \mathbf{x}_{j-1}} \frac{\partial x_{kj}}{\partial \boldsymbol{\epsilon}_{j-1}} \right) \right. \\ &\left. + \frac{dy_{j-1}^\top}{dy_{ia}} \left( \frac{\partial x_{kj}}{\partial \mathbf{y}_{j-1}} + \frac{\partial \boldsymbol{\epsilon}_{j-1}^\top}{\partial \mathbf{y}_{j-1}} \frac{\partial x_{kj}}{\partial \boldsymbol{\epsilon}_{j-1}} \right) \right] \Big|_{y=\bar{y}}. \end{aligned}$$

Hence,

$$\begin{aligned} \frac{dx_j^\top}{dy_{ia}} \Big|_{y=\bar{y}} &= \left[ \frac{dx_{j-1}^\top}{dy_{ia}} \left( \frac{\partial x_j^\top}{\partial \mathbf{x}_{j-1}} + \frac{\partial \boldsymbol{\epsilon}_{j-1}^\top}{\partial \mathbf{x}_{j-1}} \frac{\partial x_j^\top}{\partial \boldsymbol{\epsilon}_{j-1}} \right) \right. \\ &\left. + \frac{dy_{j-1}^\top}{dy_{ia}} \left( \frac{\partial x_j^\top}{\partial \mathbf{y}_{j-1}} + \frac{\partial \boldsymbol{\epsilon}_{j-1}^\top}{\partial \mathbf{y}_{j-1}} \frac{\partial x_j^\top}{\partial \boldsymbol{\epsilon}_{j-1}} \right) \right] \Big|_{y=\bar{y}}, \quad (\text{A45}) \end{aligned}$$

2808 where we use the matrix of *direct effects of a mutant's controls at*  
2809 *age  $j$  on her states at age  $j+1$*

$$\frac{\partial x_{j+1}^\top}{\partial \mathbf{y}_j} \Big|_{y=\bar{y}} \equiv \left( \begin{array}{ccc} \frac{\partial x_{1,j+1}}{\partial y_{1j}} & \dots & \frac{\partial x_{N_s,j+1}}{\partial y_{1j}} \\ \vdots & \ddots & \vdots \\ \frac{\partial x_{1,j+1}}{\partial y_{N_cj}} & \dots & \frac{\partial x_{N_s,j+1}}{\partial y_{N_cj}} \end{array} \right) \Big|_{y=\bar{y}} \in \mathbb{R}^{N_c \times N_s}.$$

We can write Eq. (A45) more succinctly as

$$\frac{dx_j^\top}{dy_{ia}} \Big|_{y=\bar{y}} = \left( \frac{dx_{j-1}^\top}{dy_{ia}} \frac{\delta \mathbf{x}_j^\top}{\delta \mathbf{x}_{j-1}} + \frac{dy_{j-1}^\top}{dy_{ia}} \frac{\delta \mathbf{x}_j^\top}{\delta \mathbf{y}_{j-1}} \right) \Big|_{y=\bar{y}}, \quad (\text{A46})$$

2811 where we use the matrix of *semi-total effects of a mutant's controls*  
2812 *at age  $j$  on her states at age  $j+1$*

$$\frac{\delta \mathbf{x}_{j+1}^\top}{\delta \mathbf{y}_j} \Big|_{y=\bar{y}} = \left( \frac{\partial \mathbf{x}_{j+1}^\top}{\partial \mathbf{y}_j} + \frac{\partial \boldsymbol{\epsilon}_j^\top}{\partial \mathbf{y}_j} \frac{\partial \mathbf{x}_{j+1}^\top}{\partial \boldsymbol{\epsilon}_j} \right) \Big|_{y=\bar{y}} \in \mathbb{R}^{N_c \times N_s}. \quad (\text{A47})$$

2813 We also define the corresponding matrix across all ages.  
 2814 Specifically, the block matrix of *semi-total effects of a mutant's*  
 2815 *controls on her states* is

$$\begin{aligned} \frac{\delta \mathbf{x}^\top}{\delta \mathbf{y}} \Big|_{\mathbf{y}=\bar{\mathbf{y}}} &\equiv \left( \begin{array}{ccc} \frac{\delta \mathbf{x}_1^\top}{\delta \mathbf{y}_1} & \cdots & \frac{\delta \mathbf{x}_{N_a}^\top}{\delta \mathbf{y}_1} \\ \vdots & \ddots & \vdots \\ \frac{\delta \mathbf{x}_1^\top}{\delta \mathbf{y}_{N_a}} & \cdots & \frac{\delta \mathbf{x}_{N_a}^\top}{\delta \mathbf{y}_{N_a}} \end{array} \right) \Big|_{\mathbf{y}=\bar{\mathbf{y}}} \\ &= \left( \begin{array}{ccccc} \mathbf{0} & \frac{\delta \mathbf{x}_2^\top}{\delta \mathbf{y}_1} & \cdots & \mathbf{0} & \mathbf{0} \\ \mathbf{0} & \mathbf{0} & \cdots & \mathbf{0} & \mathbf{0} \\ \vdots & \vdots & \ddots & \vdots & \vdots \\ \mathbf{0} & \mathbf{0} & \cdots & \mathbf{0} & \frac{\delta \mathbf{x}_{N_a}^\top}{\delta \mathbf{y}_{N_a-1}} \\ \mathbf{0} & \mathbf{0} & \cdots & \mathbf{0} & \mathbf{0} \end{array} \right) \Big|_{\mathbf{y}=\bar{\mathbf{y}}} \quad (\text{A48}) \\ &\in \mathbb{R}^{N_a N_c \times N_a N_s}. \end{aligned}$$

2816 The equality (A48) follows because semi-total effects of a mutant's controls on her states are only non-zero at the next age (from the developmental constraint (8)). Using Eqs. (33d) and (33c), we have that

$$\frac{\partial \boldsymbol{\epsilon}^\top}{\partial \mathbf{y}} \frac{\partial \mathbf{x}^\top}{\partial \boldsymbol{\epsilon}} = \left( \sum_{k=1}^{N_a} \frac{\partial \boldsymbol{\epsilon}_k^\top}{\partial \mathbf{y}_a} \frac{\partial \mathbf{x}_k^\top}{\partial \boldsymbol{\epsilon}_k} \right) = \left( \begin{array}{l} \frac{\partial \boldsymbol{\epsilon}_a^\top}{\partial \mathbf{y}_a} \frac{\partial \mathbf{x}_a^\top}{\partial \boldsymbol{\epsilon}_a} \text{ for } j = a + 1 \\ \mathbf{0} \text{ for } j \neq a + 1 \end{array} \right), \quad (\text{A49})$$

2820 which equals the rightmost term in Eq. (A47) for  $j = a + 1$ .  
 2821 Thus, from Eqs. (A47)–(A49), it follows that the block matrix of  
 2822 semi-total effects of a mutant's controls on her states satisfies  
 2823 Eq. (42).

2824 Eq. (A46) gives the matrix of total effects of a mutant's  $i$ -th  
 2825 control at age  $a$  on her states at age  $j$ . Then, it follows that the  
 2826 matrix of total effects of all of a mutant's controls at age  $a$  on her  
 2827 states at age  $j$  is

$$\frac{d\mathbf{x}_j^\top}{d\mathbf{y}_a} \Big|_{\mathbf{y}=\bar{\mathbf{y}}} = \left( \frac{d\mathbf{x}_{j-1}^\top}{d\mathbf{y}_a} \frac{\delta \mathbf{x}_j^\top}{\delta \mathbf{x}_{j-1}} + \frac{d\mathbf{y}_{j-1}^\top}{d\mathbf{y}_a} \frac{\delta \mathbf{x}_j^\top}{\delta \mathbf{y}_{j-1}} \right) \Big|_{\mathbf{y}=\bar{\mathbf{y}}}. \quad (\text{A50})$$

2828 Eq. (A50) is a recurrence equation for  $d\mathbf{x}_j^\top/d\mathbf{y}_a$  over age  $j \in$   
 2829  $\{2, \dots, N_a\}$ . Since a given entry of the operator  $d/d\mathbf{y}$  takes the  
 2830 total derivative with respect to a given  $y_{ia}$  while keeping all the  
 2831 other controls constant and controls are open-loop, a perturbation  
 2832 in an individual's control does not affect any other of the individual's  
 2833 control variables (i.e.,  $d\mathbf{y}_a^\top/d\mathbf{y}_a = \mathbf{I}$  and  $d\mathbf{y}_j^\top/d\mathbf{y}_a = \mathbf{0}$   
 2834 for  $j \neq a$ ). Thus, the matrix of total effects of a mutant's controls  
 2835 on her controls is

$$\begin{aligned} \frac{d\mathbf{y}^\top}{d\mathbf{y}} &= \left( \begin{array}{ccc} \frac{d\mathbf{y}_1^\top}{d\mathbf{y}_1} & \cdots & \frac{d\mathbf{y}_{N_a}^\top}{d\mathbf{y}_1} \\ \vdots & \ddots & \vdots \\ \frac{d\mathbf{y}_1^\top}{d\mathbf{y}_{N_a}} & \cdots & \frac{d\mathbf{y}_{N_a}^\top}{d\mathbf{y}_{N_a}} \end{array} \right) = \left( \begin{array}{ccccc} \mathbf{I} & \mathbf{0} & \cdots & \mathbf{0} & \mathbf{0} \\ \mathbf{0} & \mathbf{I} & \cdots & \mathbf{0} & \mathbf{0} \\ \vdots & \vdots & \ddots & \vdots & \vdots \\ \mathbf{0} & \mathbf{0} & \cdots & \mathbf{I} & \mathbf{0} \\ \mathbf{0} & \mathbf{0} & \cdots & \mathbf{0} & \mathbf{I} \end{array} \right) \\ &= \mathbf{I} \in \mathbb{R}^{N_a N_c \times N_a N_c}. \quad (\text{A51}) \end{aligned}$$

2836 Moreover, because of the arrow of developmental time (due  
 2837 to the developmental constraint (8)), perturbations in an individual's  
 2838 late control variables do not affect the individual's  
 2839 early state variables (i.e.,  $d\mathbf{x}_j^\top/d\mathbf{y}_a = \mathbf{0}$  for  $j < a$  and  $j \in$   
 2840  $\{1, \dots, N_a - 1\}$ )<sup>2</sup>. Additionally, from the arrow of developmen-  
 2841 tal time (Eq. 8), a perturbation in an individual's control variable  
 2842 at a given age does not affect any of the individual's state vari-  
 2843 ables at the *same* age (i.e.,  $d\mathbf{x}_j^\top/d\mathbf{y}_a = \mathbf{0}$  for  $j = a$ ). Consequently,  
 2844 Eq. (A50) for  $j \in \{1, \dots, N_a\}$  reduces to

$$\begin{aligned} \frac{d\mathbf{x}_j^\top}{d\mathbf{y}_a} \Big|_{\mathbf{y}=\bar{\mathbf{y}}} &= \begin{cases} \left( \frac{d\mathbf{x}_{j-1}^\top}{d\mathbf{y}_a} \frac{\delta \mathbf{x}_j^\top}{\delta \mathbf{x}_{j-1}} + \underbrace{\frac{d\mathbf{y}_{j-1}^\top}{d\mathbf{y}_a} \frac{\delta \mathbf{x}_j^\top}{\delta \mathbf{y}_{j-1}}}_{\mathbf{0}, \text{ from (A51)}} \right) \Big|_{\mathbf{y}=\bar{\mathbf{y}}} & \text{for } j - 1 > a \\ \left( \frac{d\mathbf{x}_{j-1}^\top}{d\mathbf{y}_a} \frac{\delta \mathbf{x}_j^\top}{\delta \mathbf{x}_{j-1}} + \underbrace{\frac{d\mathbf{y}_{j-1}^\top}{d\mathbf{y}_a} \frac{\delta \mathbf{x}_j^\top}{\delta \mathbf{y}_{j-1}}}_{\mathbf{I}, \text{ from (A51)}} \right) \Big|_{\mathbf{y}=\bar{\mathbf{y}}} & \text{for } j - 1 = a \\ \left( \frac{d\mathbf{x}_{j-1}^\top}{d\mathbf{y}_a} \frac{\delta \mathbf{x}_j^\top}{\delta \mathbf{x}_{j-1}} + \underbrace{\frac{d\mathbf{y}_{j-1}^\top}{d\mathbf{y}_a} \frac{\delta \mathbf{x}_j^\top}{\delta \mathbf{y}_{j-1}}}_{\mathbf{0}, \text{ from (A51)}} \right) \Big|_{\mathbf{y}=\bar{\mathbf{y}}} & \text{for } j - 1 < a. \end{cases} \end{aligned}$$

2845 That is,

$$\frac{d\mathbf{x}_j^\top}{d\mathbf{y}_a} \Big|_{\mathbf{y}=\bar{\mathbf{y}}} = \begin{cases} \left( \frac{d\mathbf{x}_{j-1}^\top}{d\mathbf{y}_a} \frac{\delta \mathbf{x}_j^\top}{\delta \mathbf{x}_{j-1}} \right) \Big|_{\mathbf{y}=\bar{\mathbf{y}}} & \text{for } j - 1 > a \\ \frac{\delta \mathbf{x}_j^\top}{\delta \mathbf{y}_{j-1}} \Big|_{\mathbf{y}=\bar{\mathbf{y}}} & \text{for } j - 1 = a \\ \mathbf{0} & \text{for } j - 1 < a. \end{cases}$$

2846 Expanding this recurrence yields

$$\frac{d\mathbf{x}_j^\top}{d\mathbf{y}_a} \Big|_{\mathbf{y}=\bar{\mathbf{y}}} = \begin{cases} \left( \frac{d\mathbf{x}_{a+1}^\top}{d\mathbf{y}_a} \frac{\delta \mathbf{x}_{a+2}^\top}{\delta \mathbf{x}_{a+1}} \cdots \frac{\delta \mathbf{x}_j^\top}{\delta \mathbf{x}_{j-1}} \right) \Big|_{\mathbf{y}=\bar{\mathbf{y}}} & \text{for } j - 1 > a \\ \frac{\delta \mathbf{x}_{a+1}^\top}{\delta \mathbf{y}_a} \Big|_{\mathbf{y}=\bar{\mathbf{y}}} & \text{for } j - 1 = a \\ \mathbf{0} & \text{for } j - 1 < a. \end{cases} \quad (\text{A52})$$

2847 Evaluating Eq. (A52) at  $j = a + 1$  yields

$$\frac{d\mathbf{x}_{a+1}^\top}{d\mathbf{y}_a} \Big|_{\mathbf{y}=\bar{\mathbf{y}}} = \frac{\delta \mathbf{x}_{a+1}^\top}{\delta \mathbf{y}_a} \Big|_{\mathbf{y}=\bar{\mathbf{y}}},$$

<sup>2</sup> Again, we take the derivative  $d\mathbf{x}_j^\top/d\mathbf{y}_{ia}$  as referring to the effect on  $\mathbf{x}_j^\top$  of a perturbation of the initial condition  $\mathbf{y}_a$  of the difference equation (8) applied at the ages  $\{a, \dots, n\}$ . Hence, if  $j < a$ ,  $\mathbf{x}_j^\top$  is unmodified by a change in the initial condition of (8) applied at the ages  $\{a, \dots, n\}$ .

2848 which substituted back in the top line of Eq (A52) yields

$$\frac{dx_j^\top}{dy_a} \Big|_{y=\bar{y}} = \begin{cases} \left( \frac{\delta x_{a+1}^\top}{\delta y_a} \frac{\delta x_{a+2}^\top}{\delta x_{a+1}} \dots \frac{\delta x_j^\top}{\delta x_{j-1}} \right) \Big|_{y=\bar{y}} & \text{for } j-1 > a \\ \frac{\delta x_{a+1}^\top}{\delta y_a} \Big|_{y=\bar{y}} & \text{for } j-1 = a \\ \mathbf{0} & \text{for } j-1 < a. \end{cases} \quad (\text{A53})$$

2849 Hence, the block matrix of total effects of a mutant's controls on her  
2850 states is

$$\frac{dx^\top}{dy} \Big|_{y=\bar{y}} = \begin{pmatrix} \frac{dx_1^\top}{dy_1} & \dots & \frac{dx_{N_a}^\top}{dy_1} \\ \vdots & \ddots & \vdots \\ \frac{dx_1^\top}{dy_{N_a}} & \dots & \frac{dx_{N_a}^\top}{dy_{N_a}} \end{pmatrix} \Big|_{y=\bar{y}} = \begin{pmatrix} \mathbf{0} & \frac{dx_2^\top}{dy_1} & \dots & \frac{dx_{N_a-1}^\top}{dy_1} & \frac{dx_{N_a}^\top}{dy_1} \\ \mathbf{0} & \mathbf{0} & \dots & \frac{dx_{N_a-1}^\top}{dy_2} & \frac{dx_{N_a}^\top}{dy_2} \\ \vdots & \vdots & \ddots & \vdots & \vdots \\ \mathbf{0} & \mathbf{0} & \dots & \mathbf{0} & \frac{dx_{N_a}^\top}{dy_{N_a-1}} \\ \mathbf{0} & \mathbf{0} & \dots & \mathbf{0} & \mathbf{0} \end{pmatrix} \Big|_{y=\bar{y}} \quad (\text{A54})$$

$\in \mathbb{R}^{N_a N_c \times N_a N_s}$ ,

2851 whose  $aj$ -th entry is given by

$$\frac{dx_j^\top}{dy_a} = \begin{cases} \frac{\delta x_{a+1}^\top}{\delta y_a} \frac{dx_j^\top}{dx_{a+1}} & \text{for } j > a \\ \mathbf{0} & \text{for } j \leq a \end{cases} = \begin{cases} \frac{\delta x_{a+1}^\top}{\delta y_a} \prod_{k=a+1}^{j-1} \frac{\delta x_{k+1}^\top}{\delta x_k} & \text{for } j > a \\ \mathbf{0} & \text{for } j \leq a \end{cases} = \begin{cases} \frac{\delta x_{a+1}^\top}{\delta y_a} \frac{\delta x_{a+2}^\top}{\delta x_{a+1}} \dots \frac{\delta x_j^\top}{\delta x_{j-1}} & \text{for } j > a \\ \mathbf{0} & \text{for } j \leq a, \end{cases} \quad (\text{A55})$$

2852 where we use Eq. (A33) and adopt the empty-product conven-  
2853 tion that

$$\frac{dx_{a+1}^\top}{dx_{a+1}} = \prod_{k=a+1}^a \frac{\delta x_{k+1}^\top}{\delta x_k} = \mathbf{I}.$$

2854 Eqs. (A54) and (A55) write the matrix of total effects of a mutant's  
2855 controls on her states in terms of partial derivatives, given  
2856 Eq. (A47), as we sought.

2857 We now obtain a more compact expression for the matrix of total effects of a mutant's controls on her states in terms of partial derivatives. To do this, we note a relationship between the matrix of total effects of a mutant's controls on her states

with the matrix of total effects of a mutant's states on her states. Note that the  $aj$ -th entry of  $(\delta x^\top / \delta y)(dx^\top / dx)$  is

$$\begin{aligned} \left( \frac{\delta x^\top}{\delta y} \frac{dx^\top}{dx} \right)_{aj} &= \sum_{k=1}^{N_a} \frac{\delta x_k^\top}{\delta y_a} \frac{dx_j^\top}{dx_k} \\ &= \frac{\delta x_{a+1}^\top}{\delta y_a} \frac{dx_j^\top}{dx_{a+1}} \\ &= \frac{dx_j^\top}{dy_a}, \end{aligned}$$

2863 where we use Eq. (A48) in the second equality and Eq. (A55) in  
2864 the third equality, noting that  $dx_j^\top / dx_{a+1} = \mathbf{0}$  and  $dx_j^\top / dy_a = \mathbf{0}$   
2865 for  $j \leq a$ . Hence, Eq. (45) follows, which is a compact expression  
2866 for the matrix of total effects of a mutant's controls on her states  
2867 in terms of partial derivatives only, once Eqs. (44) and (42) are  
2868 used.

### 2869 Conclusion

**Form 1** Using Eqs. (A44), (A51), and (40) for  $\zeta \in \{x, y\}$ , we have  
2870 that the total selection gradient of controls is  
2871

$$\frac{dw}{dy} \Big|_{y=\bar{y}} = \left[ \frac{dx^\top}{dy} \left( \frac{\partial w}{\partial x} + \frac{\partial \epsilon^\top}{\partial x} \frac{\partial w}{\partial \epsilon} \right) + \frac{\partial w}{\partial y} + \frac{\partial \epsilon^\top}{\partial y} \frac{\partial w}{\partial \epsilon} \right] \Big|_{y=\bar{y}}.$$

2872 Thus, using Eq. (50) yields the first line of Eq. (64).

**Form 2** Using Eqs. (A44) and (A51), the total selection gradient  
2873 of controls is given by the second line of Eq. (64).  
2874

**Form 3** Using Eqs. (A44), (A38), and (54), we have that the total  
2875 selection gradient of controls is given by the third line of Eq. (64).  
2876

**Form 4** Using the first line of Eqs. (64) and (57), we obtain the  
2877 fourth line of Eq. (64).  
2878

**Form 5** Finally, we can rearrange total genetic selection (64) in  
2879 terms of total selection on states. Using Eq. (45) in the second  
2880 line of Eq. (64), and then using the second line of Eq. (63), we  
2881 have that the total selection gradient of controls is given by the  
2882 fifth line of Eq. (64).  
2883

### 2884 Appendix 6: total selection gradient of the environment

2885 Here proceed analogously to derive the total selection gradient  
2886 of the environment, which allows us to write an equation  
2887 describing the evolutionary dynamics of the metaphenotype.

#### 2888 Total selection gradient of the environment in terms of direct 2889 fitness effects

2890 As before, we start by considering the total selection gradient  
2891 entry for the  $i$ -th environmental variable at age  $a$ . By this, we  
2892 mean the total selection gradient of a perturbation of  $\epsilon_{ia}$  taken  
2893 as initial condition of the developmental constraint (8) when  
2894 applied at the ages  $\{a, \dots, n\}$ . Consequently, an environmental  
2895 perturbation at a given age does not affect states at earlier ages  
2896 due to the arrow of developmental time. By letting  $\zeta$  in Eq. (27)  
2897 be  $\epsilon_{ia}$ , we have

$$\frac{d\lambda}{d\epsilon_{ia}} \Big|_{y=\bar{y}} = \frac{dw}{d\epsilon_{ia}} \Big|_{y=\bar{y}} = \sum_{j=1}^{N_a} \frac{dw_j}{d\epsilon_{ia}} \Big|_{y=\bar{y}}. \quad (\text{A56})$$

2898 The total derivatives of a mutant's relative fitness at age  $j$  in  
2899 Eq. (A56) are with respect to the individual's environmental

2900 variables at possibly another age  $a$ . We now seek to express such  
2901 selection gradient in terms of partial derivatives only.

2902 From Eq. (24), we have  $w_j(\mathbf{z}_j, \bar{\mathbf{z}}, \mathbf{e}_j)$  and  $\mathbf{z}_j = (\mathbf{x}_j; \mathbf{y}_j)$ , so ap-  
2903 plying the chain rule and, since we assume that controls are  
2904 open-loop (hence, controls do not depend on the environment,  
2905 so  $d\mathbf{y}_j/d\epsilon_{ia} = \mathbf{0}$  for all  $i \in \{1, \dots, N_s\}$  and all  $a, j \in \{1, \dots, N_a\}$ ),  
2906 we obtain

$$\begin{aligned} \left. \frac{dw_j}{d\epsilon_{ia}} \right|_{\mathbf{y}=\bar{\mathbf{y}}} &= \left( \sum_{k=1}^{N_s} \frac{\partial w_j}{\partial x_{kj}} \frac{dx_{kj}}{d\epsilon_{ia}} + \sum_{k=1}^{N_e} \frac{\partial w_j}{\partial \epsilon_{kj}} \frac{d\epsilon_{kj}}{d\epsilon_{ia}} \right) \Big|_{\mathbf{y}=\bar{\mathbf{y}}} \\ &= \left( \frac{d\mathbf{x}_j^T}{d\epsilon_{ia}} \frac{\partial w_j}{\partial \mathbf{x}_j} + \frac{d\mathbf{e}_j^T}{d\epsilon_{ia}} \frac{\partial w_j}{\partial \mathbf{e}_j} \right) \Big|_{\mathbf{y}=\bar{\mathbf{y}}}. \end{aligned}$$

2907 In the last equality we applied matrix calculus notation (Ap-  
2908 pendix 14). Using Eq. (A20) we have

$$\left. \frac{dw_j}{d\epsilon_{ia}} \right|_{\mathbf{y}=\bar{\mathbf{y}}} = \left( \frac{d\mathbf{x}_j^T}{d\epsilon_{ia}} \frac{\partial w}{\partial \mathbf{x}_j} + \frac{d\mathbf{e}_j^T}{d\epsilon_{ia}} \frac{\partial w}{\partial \mathbf{e}_j} \right) \Big|_{\mathbf{y}=\bar{\mathbf{y}}}. \quad (\text{A57})$$

2909 Substituting Eq. (A57) in (A56) yields

$$\begin{aligned} \left. \frac{dw}{d\epsilon_{ia}} \right|_{\mathbf{y}=\bar{\mathbf{y}}} &= \sum_{j=1}^{N_a} \left( \frac{d\mathbf{x}_j^T}{d\epsilon_{ia}} \frac{\partial w}{\partial \mathbf{x}_j} + \frac{d\mathbf{e}_j^T}{d\epsilon_{ia}} \frac{\partial w}{\partial \mathbf{e}_j} \right) \Big|_{\mathbf{y}=\bar{\mathbf{y}}} \\ &= \left( \frac{d\mathbf{x}^T}{d\epsilon_{ia}} \frac{\partial w}{\partial \mathbf{x}} + \frac{d\mathbf{e}^T}{d\epsilon_{ia}} \frac{\partial w}{\partial \mathbf{e}} \right) \Big|_{\mathbf{y}=\bar{\mathbf{y}}}. \end{aligned}$$

2910 Therefore, the total selection gradient of all environmental vari-  
2911 ables across all ages is

$$\left. \frac{d\mathbf{x}^T}{d\mathbf{e}} \right|_{\mathbf{y}=\bar{\mathbf{y}}} = \left( \frac{d\mathbf{x}^T}{d\mathbf{e}} \frac{\partial w}{\partial \mathbf{x}} + \frac{d\mathbf{e}^T}{d\mathbf{e}} \frac{\partial w}{\partial \mathbf{e}} \right) \Big|_{\mathbf{y}=\bar{\mathbf{y}}} \in \mathbb{R}^{N_a N_e \times 1}, \quad (\text{A58})$$

2912 where we use the block matrix of *total effects of a mutant's environ-*  
2913 *ment on her states*

$$\left. \frac{d\mathbf{x}^T}{d\mathbf{e}} \right|_{\mathbf{y}=\bar{\mathbf{y}}} \equiv \left( \begin{array}{ccc} \frac{d\mathbf{x}_1^T}{d\mathbf{e}_1} & \dots & \frac{d\mathbf{x}_{N_a}^T}{d\mathbf{e}_1} \\ \vdots & \ddots & \vdots \\ \frac{d\mathbf{x}_1^T}{d\mathbf{e}_{N_a}} & \dots & \frac{d\mathbf{x}_{N_a}^T}{d\mathbf{e}_{N_a}} \end{array} \right) \Big|_{\mathbf{y}=\bar{\mathbf{y}}} \in \mathbb{R}^{N_a N_s \times N_a N_e}$$

2914 and the block matrix of *total effects of a mutant's environment on*  
2915 *her environment*

$$\left. \frac{d\mathbf{e}^T}{d\mathbf{e}} \right|_{\mathbf{y}=\bar{\mathbf{y}}} \equiv \left( \begin{array}{ccc} \frac{d\mathbf{e}_1^T}{d\mathbf{e}_1} & \dots & \frac{d\mathbf{e}_{N_a}^T}{d\mathbf{e}_1} \\ \vdots & \ddots & \vdots \\ \frac{d\mathbf{e}_1^T}{d\mathbf{e}_{N_a}} & \dots & \frac{d\mathbf{e}_{N_a}^T}{d\mathbf{e}_{N_a}} \end{array} \right) \Big|_{\mathbf{y}=\bar{\mathbf{y}}} \in \mathbb{R}^{N_a N_e \times N_a N_e}.$$

2916 Expression (A58) is now in terms of partial derivatives of fitness,  
2917 total effects of a mutant's environment on her states,  $d\mathbf{x}^T/d\mathbf{e}$ ,  
2918 and total effects of a mutant's environment on her environment,  
2919  $d\mathbf{e}^T/d\mathbf{e}$ . We now proceed to write  $d\mathbf{x}^T/d\mathbf{e}$  and  $d\mathbf{e}^T/d\mathbf{e}$  in terms  
2920 of partial derivatives only.

### 2921 **Matrix of total effects of a mutant's environment on her envi-** 2922 **ronment**

2923 From the environmental constraint (9) for the  $k$ -th environmental  
2924 variable at age  $j \in \{1, \dots, N_a\}$  we have that  $\epsilon_{kj} = h_{kj}(\mathbf{z}_j, \bar{\mathbf{z}}, \tau)$ ,  
2925 so using the chain rule since controls are open-loop yields

$$\begin{aligned} \left. \frac{d\epsilon_{kj}}{d\epsilon_{ia}} \right|_{\mathbf{y}=\bar{\mathbf{y}}} &= \begin{cases} \left( \sum_{l=1}^{N_s} \frac{\partial h_{kj}}{\partial x_{lj}} \frac{dx_{lj}}{d\epsilon_{ia}} \right) \Big|_{\mathbf{y}=\bar{\mathbf{y}}} & \text{for } j > a \\ \frac{\partial \epsilon_{kj}}{\partial \epsilon_{ia}} \Big|_{\mathbf{y}=\bar{\mathbf{y}}} & \text{for } j = a \\ 0 & \text{for } j < a \end{cases} \\ &= \begin{cases} \left( \frac{d\mathbf{x}_j^T}{d\epsilon_{ia}} \frac{\partial \epsilon_{kj}}{\partial \mathbf{x}_j} \right) \Big|_{\mathbf{y}=\bar{\mathbf{y}}} & \text{for } j > a \\ \frac{\partial \epsilon_{kj}}{\partial \epsilon_{ia}} \Big|_{\mathbf{y}=\bar{\mathbf{y}}} & \text{for } j = a \\ 0 & \text{for } j < a. \end{cases} \end{aligned}$$

2926 In the last equality we used matrix calculus notation and rewrote  
2927  $h_{kj}$  as  $\epsilon_{kj}$ . Since we assume that environmental variables are mu-  
2928 tually independent, we have that  $\partial \epsilon_{ka}/\partial \epsilon_{ia} = 1$  if  $i = k$  or  
2929  $\partial \epsilon_{ka}/\partial \epsilon_{ia} = 0$  otherwise; however, we leave the partial deriva-  
2930 tives  $\partial \epsilon_{ka}/\partial \epsilon_{ia}$  unevaluated as it is conceptually useful. Hence,

$$\left. \frac{d\mathbf{e}_j^T}{d\epsilon_{ia}} \right|_{\mathbf{y}=\bar{\mathbf{y}}} = \begin{cases} \left( \frac{d\mathbf{x}_j^T}{d\epsilon_{ia}} \frac{\partial \mathbf{e}_j^T}{\partial \mathbf{x}_j} \right) \Big|_{\mathbf{y}=\bar{\mathbf{y}}} & \text{for } j > a \\ \frac{\partial \mathbf{e}_j^T}{\partial \epsilon_{ia}} \Big|_{\mathbf{y}=\bar{\mathbf{y}}} & \text{for } j = a \\ \mathbf{0} & \text{for } j < a. \end{cases}$$

2931 Then, the matrix of total effects of a mutant's environment at  
2932 age  $a$  on her environment at age  $j$  is

$$\left. \frac{d\mathbf{e}_j^T}{d\mathbf{e}_a} \right|_{\mathbf{y}=\bar{\mathbf{y}}} = \begin{cases} \left( \frac{d\mathbf{x}_j^T}{d\mathbf{e}_a} \frac{\partial \mathbf{e}_j^T}{\partial \mathbf{x}_j} \right) \Big|_{\mathbf{y}=\bar{\mathbf{y}}} & \text{for } j > a \\ \frac{\partial \mathbf{e}_j^T}{\partial \mathbf{e}_a} \Big|_{\mathbf{y}=\bar{\mathbf{y}}} & \text{for } j = a \\ \mathbf{0} & \text{for } j < a. \end{cases} \quad (\text{A59})$$

2933 Hence, the block matrix of *total effects of a mutant's environment*  
2934 *on her environment* is

$$\left. \frac{d\mathbf{e}^T}{d\mathbf{e}} \right|_{\mathbf{y}=\bar{\mathbf{y}}} \equiv \left( \begin{array}{ccc} \frac{d\mathbf{e}_1^T}{d\mathbf{e}_1} & \dots & \frac{d\mathbf{e}_{N_a}^T}{d\mathbf{e}_1} \\ \vdots & \ddots & \vdots \\ \frac{d\mathbf{e}_1^T}{d\mathbf{e}_{N_a}} & \dots & \frac{d\mathbf{e}_{N_a}^T}{d\mathbf{e}_{N_a}} \end{array} \right) \Big|_{\mathbf{y}=\bar{\mathbf{y}}}$$

$$= \begin{pmatrix} \frac{\partial \mathbf{e}_1^\top}{\partial \mathbf{e}_1} & \frac{\partial \mathbf{e}_2^\top}{\partial \mathbf{e}_1} & \dots & \frac{\partial \mathbf{e}_{N_a-1}^\top}{\partial \mathbf{e}_1} & \frac{\partial \mathbf{e}_{N_a}^\top}{\partial \mathbf{e}_1} \\ \mathbf{0} & \frac{\partial \mathbf{e}_2^\top}{\partial \mathbf{e}_2} & \dots & \frac{\partial \mathbf{e}_{N_a-1}^\top}{\partial \mathbf{e}_2} & \frac{\partial \mathbf{e}_{N_a}^\top}{\partial \mathbf{e}_2} \\ \vdots & \vdots & \ddots & \vdots & \vdots \\ \mathbf{0} & \mathbf{0} & \dots & \frac{\partial \mathbf{e}_{N_a-1}^\top}{\partial \mathbf{e}_{N_a-1}} & \frac{\partial \mathbf{e}_{N_a}^\top}{\partial \mathbf{e}_{N_a-1}} \\ \mathbf{0} & \mathbf{0} & \dots & \mathbf{0} & \frac{\partial \mathbf{e}_{N_a}^\top}{\partial \mathbf{e}_{N_a}} \end{pmatrix} \Bigg|_{\mathbf{y}=\bar{\mathbf{y}}} \quad (\text{A60})$$

$\in \mathbb{R}^{N_a N_e \times N_a N_e}$ .

2935 Note that the  $aj$ -th entry of  $(d\mathbf{x}^\top/d\mathbf{e})(\partial\mathbf{e}^\top/\partial\mathbf{x})$  for  $j > a$  is

$$\left( \frac{d\mathbf{x}^\top}{d\mathbf{e}} \frac{\partial \mathbf{e}^\top}{\partial \mathbf{x}} \right)_{aj} = \sum_{k=1}^{N_a} \frac{dx_k^\top}{d\mathbf{e}_a} \frac{\partial \mathbf{e}_j^\top}{\partial x_k} = \frac{dx_j^\top}{d\mathbf{e}_a} \frac{\partial \mathbf{e}_j^\top}{\partial x_j},$$

2936 where we use Eq. (33d) in the second equality. Note also  
 2937 that since environmental variables are mutually independent,  
 2938  $\partial \mathbf{e}_j^\top / \partial \mathbf{e}_a = \mathbf{0}$  for  $j \neq a$  from the environmental constraint (9).  
 2939 Finally, note that because of the arrow of developmental time,  
 2940  $\partial \mathbf{x}_j^\top / \partial \mathbf{e}_a = \mathbf{0}$  for  $j < a$  due to the developmental constraint (8).  
 2941 Hence, Eq. (52) follows, which is a compact expression for the  
 2942 matrix of total effects of a mutant's environment on itself in  
 2943 terms of partial derivatives and the total effects of a mutant's en-  
 2944 vironment on her states, which we now write in terms of partial  
 2945 derivatives only.

#### 2946 **Matrix of total effects of a mutant's environment on her states**

2947 From the developmental constraint (8) for the  $k$ -th state variable  
 2948 at age  $j \in \{2, \dots, N_a\}$  we have that  $x_{kj} = g_{k,j-1}(\mathbf{z}_{j-1}, \bar{\mathbf{z}}, \mathbf{e}_{j-1})$ , so  
 2949 using the chain rule since controls are open-loop yields

$$\begin{aligned} \frac{dx_{kj}}{d\mathbf{e}_{ia}} \Big|_{\mathbf{y}=\bar{\mathbf{y}}} &= \left( \sum_{l=1}^{N_s} \frac{\partial g_{k,j-1}}{\partial x_{l,j-1}} \frac{dx_{l,j-1}}{d\mathbf{e}_{ia}} + \sum_{l=1}^{N_e} \frac{\partial g_{k,j-1}}{\partial \mathbf{e}_{l,j-1}} \frac{d\mathbf{e}_{l,j-1}}{d\mathbf{e}_{ia}} \right) \Big|_{\mathbf{y}=\bar{\mathbf{y}}} \\ &= \left( \frac{dx_{j-1}^\top}{d\mathbf{e}_{ia}} \frac{\partial x_{kj}}{\partial \mathbf{x}_{j-1}} + \frac{d\mathbf{e}_{j-1}^\top}{d\mathbf{e}_{ia}} \frac{\partial x_{kj}}{\partial \mathbf{e}_{j-1}} \right) \Big|_{\mathbf{y}=\bar{\mathbf{y}}}. \end{aligned}$$

2950 In the last equality we used matrix calculus notation and rewrote  
 2951  $g_{k,j-1}$  as  $x_{kj}$ . Hence,

$$\frac{dx_j^\top}{d\mathbf{e}_{ia}} \Big|_{\mathbf{y}=\bar{\mathbf{y}}} = \left( \frac{dx_{j-1}^\top}{d\mathbf{e}_{ia}} \frac{\partial \mathbf{x}_j^\top}{\partial \mathbf{x}_{j-1}} + \frac{d\mathbf{e}_{j-1}^\top}{d\mathbf{e}_{ia}} \frac{\partial \mathbf{x}_j^\top}{\partial \mathbf{e}_{j-1}} \right) \Big|_{\mathbf{y}=\bar{\mathbf{y}}}.$$

2952 Then, the matrix of total effects of a mutant's environment at  
 2953 age  $a$  on her states at age  $j$  is

$$\frac{dx_j^\top}{d\mathbf{e}_a} \Big|_{\mathbf{y}=\bar{\mathbf{y}}} = \left( \frac{dx_{j-1}^\top}{d\mathbf{e}_a} \frac{\partial \mathbf{x}_j^\top}{\partial \mathbf{x}_{j-1}} + \frac{d\mathbf{e}_{j-1}^\top}{d\mathbf{e}_a} \frac{\partial \mathbf{x}_j^\top}{\partial \mathbf{e}_{j-1}} \right) \Big|_{\mathbf{y}=\bar{\mathbf{y}}}.$$

2954 Using Eq. (A59) yields

$$\frac{dx_j^\top}{d\mathbf{e}_a} \Big|_{\mathbf{y}=\bar{\mathbf{y}}} =$$

$$\begin{cases} \left( \frac{dx_{j-1}^\top}{d\mathbf{e}_a} \frac{\partial \mathbf{x}_j^\top}{\partial \mathbf{x}_{j-1}} + \frac{d\mathbf{e}_{j-1}^\top}{d\mathbf{e}_a} \frac{\partial \mathbf{x}_j^\top}{\partial \mathbf{e}_{j-1}} \right) \Big|_{\mathbf{y}=\bar{\mathbf{y}}} & \text{for } j-1 > a \\ \left( \frac{dx_a^\top}{d\mathbf{e}_a} \frac{\partial \mathbf{x}_{a+1}^\top}{\partial \mathbf{x}_a} + \frac{d\mathbf{e}_a^\top}{d\mathbf{e}_a} \frac{\partial \mathbf{x}_{a+1}^\top}{\partial \mathbf{e}_a} \right) \Big|_{\mathbf{y}=\bar{\mathbf{y}}} & \text{for } j-1 = a \\ \left( \frac{dx_{j-1}^\top}{d\mathbf{e}_a} \frac{\partial \mathbf{x}_j^\top}{\partial \mathbf{x}_{j-1}} \right) \Big|_{\mathbf{y}=\bar{\mathbf{y}}} & \text{for } j-1 > a \\ \left[ \frac{dx_{j-1}^\top}{d\mathbf{e}_a} \left( \frac{\partial \mathbf{x}_j^\top}{\partial \mathbf{x}_{j-1}} + \frac{d\mathbf{e}_{j-1}^\top}{\partial \mathbf{x}_{j-1}} \frac{\partial \mathbf{x}_j^\top}{\partial \mathbf{e}_{j-1}} \right) \right] \Big|_{\mathbf{y}=\bar{\mathbf{y}}} & \text{for } j-1 > a \\ \left( \frac{\partial \mathbf{e}_a^\top}{\partial \mathbf{e}_a} \frac{\partial \mathbf{x}_j^\top}{\partial \mathbf{e}_{j-1}} \right) \Big|_{\mathbf{y}=\bar{\mathbf{y}}} & \text{for } j-1 = a \\ \mathbf{0} & \text{for } j-1 > a. \end{cases}$$

Using Eq. (A27), this reduces to

$$\frac{dx_j^\top}{d\mathbf{e}_a} \Big|_{\mathbf{y}=\bar{\mathbf{y}}} = \begin{cases} \left( \frac{dx_{j-1}^\top}{d\mathbf{e}_a} \frac{\partial \mathbf{x}_j^\top}{\partial \mathbf{x}_{j-1}} \right) \Big|_{\mathbf{y}=\bar{\mathbf{y}}} & \text{for } j-1 > a \\ \left( \frac{\partial \mathbf{e}_a^\top}{\partial \mathbf{e}_a} \frac{\partial \mathbf{x}_{a+1}^\top}{\partial \mathbf{e}_a} \right) \Big|_{\mathbf{y}=\bar{\mathbf{y}}} & \text{for } j-1 = a \\ \mathbf{0} & \text{for } j-1 > a. \end{cases}$$

Expanding this recurrence yields

$$\frac{dx_j^\top}{d\mathbf{e}_a} \Big|_{\mathbf{y}=\bar{\mathbf{y}}} = \begin{cases} \left( \frac{dx_{a+1}^\top}{d\mathbf{e}_a} \frac{\partial \mathbf{x}_{a+2}^\top}{\partial \mathbf{x}_{a+1}} \dots \frac{\partial \mathbf{x}_j^\top}{\partial \mathbf{x}_{j-1}} \right) \Big|_{\mathbf{y}=\bar{\mathbf{y}}} & \text{for } j-1 > a \\ \left( \frac{\partial \mathbf{e}_a^\top}{\partial \mathbf{e}_a} \frac{\partial \mathbf{x}_{a+1}^\top}{\partial \mathbf{e}_a} \right) \Big|_{\mathbf{y}=\bar{\mathbf{y}}} & \text{for } j-1 = a \\ \mathbf{0} & \text{for } j-1 > a, \end{cases}$$

which using Eq. (A33) yields

$$\frac{dx_j^\top}{d\mathbf{e}_a} \Big|_{\mathbf{y}=\bar{\mathbf{y}}} = \begin{cases} \left( \frac{\partial \mathbf{e}_a^\top}{\partial \mathbf{e}_a} \frac{\partial \mathbf{x}_{a+1}^\top}{\partial \mathbf{e}_a} \frac{d\mathbf{x}_j^\top}{d\mathbf{x}_{a+1}} \right) \Big|_{\mathbf{y}=\bar{\mathbf{y}}} & \text{for } j-1 > a \\ \left( \frac{\partial \mathbf{e}_a^\top}{\partial \mathbf{e}_a} \frac{\partial \mathbf{x}_{a+1}^\top}{\partial \mathbf{e}_a} \right) \Big|_{\mathbf{y}=\bar{\mathbf{y}}} & \text{for } j-1 = a \\ \mathbf{0} & \text{for } j-1 > a. \end{cases} \quad (\text{A61})$$

It will be useful to denote the matrix of *semi-total effects of a mutant's environment at age  $j$  on her states at age  $j$*  for  $j > 0$  as

$$\frac{\delta \mathbf{x}_j^\top}{\delta \mathbf{e}_{j-1}} \Big|_{\mathbf{y}=\bar{\mathbf{y}}} = \frac{\partial \mathbf{e}_{j-1}^\top}{\partial \mathbf{e}_{j-1}} \frac{\partial \mathbf{x}_j^\top}{\partial \mathbf{e}_{j-1}} \Big|_{\mathbf{y}=\bar{\mathbf{y}}} \in \mathbb{R}^{N_e \times N_s}. \quad (\text{A62})$$

The matrix of *direct effects of a mutant's environment on itself* is given by Eq. (34). In turn, the block matrix of *semi-total effects of*



2962 a mutant's environment on her states is

$$\begin{aligned} \left. \frac{\delta \mathbf{x}^T}{\delta \boldsymbol{\epsilon}} \right|_{\mathbf{y}=\bar{\mathbf{y}}} &\equiv \left( \begin{array}{ccc} \frac{\delta \mathbf{x}_1^T}{\delta \boldsymbol{\epsilon}_1} & \cdots & \frac{\delta \mathbf{x}_{N_a}^T}{\delta \boldsymbol{\epsilon}_1} \\ \vdots & \ddots & \vdots \\ \frac{\delta \mathbf{x}_1^T}{\delta \boldsymbol{\epsilon}_{N_a}} & \cdots & \frac{\delta \mathbf{x}_{N_a}^T}{\delta \boldsymbol{\epsilon}_{N_a}} \end{array} \right) \bigg|_{\mathbf{y}=\bar{\mathbf{y}}} \\ &= \left( \begin{array}{cccc} 0 & \frac{\delta \mathbf{x}_2^T}{\delta \boldsymbol{\epsilon}_1} & \cdots & 0 \\ 0 & 0 & \cdots & 0 \\ \vdots & \vdots & \ddots & \vdots \\ 0 & 0 & \cdots & 0 \\ 0 & 0 & \cdots & 0 \end{array} \right) \bigg|_{\mathbf{y}=\bar{\mathbf{y}}} \\ &\in \mathbb{R}^{N_a N_e \times N_a N_s}, \end{aligned} \quad (\text{A63})$$

2963 so Eq. (43) follows from Eqs. (A62), (34), and (33c).

2964 Using Eq. (A62), Eq. (A61) becomes

$$\left. \frac{\delta \mathbf{x}_j^T}{\delta \boldsymbol{\epsilon}_a} \right|_{\mathbf{y}=\bar{\mathbf{y}}} = \begin{cases} \left( \frac{\delta \mathbf{x}_{a+1}^T}{\delta \boldsymbol{\epsilon}_a} \frac{d\mathbf{x}_j^T}{d\mathbf{x}_{a+1}} \right) \bigg|_{\mathbf{y}=\bar{\mathbf{y}}} & \text{for } j-1 > a \\ \frac{\delta \mathbf{x}_{a+1}^T}{\delta \boldsymbol{\epsilon}_a} \bigg|_{\mathbf{y}=\bar{\mathbf{y}}} & \text{for } j-1 = a \\ \mathbf{0} & \text{for } j-1 < a. \end{cases}$$

2965 Note that the  $aj$ -th entry of  $(\delta \mathbf{x}^T / \delta \boldsymbol{\epsilon})(d\mathbf{x}^T / d\mathbf{x})$  is

$$\left( \frac{\delta \mathbf{x}^T}{\delta \boldsymbol{\epsilon}} \right)_{aj} = \sum_{k=1}^{N_a} \frac{\delta \mathbf{x}_k^T}{\delta \boldsymbol{\epsilon}_a} \frac{d\mathbf{x}_j^T}{d\mathbf{x}_k} = \frac{\delta \mathbf{x}_{a+1}^T}{\delta \boldsymbol{\epsilon}_a} \frac{d\mathbf{x}_j^T}{d\mathbf{x}_{a+1}} = \frac{d\mathbf{x}_j^T}{d\boldsymbol{\epsilon}_a}, \quad (\text{A64})$$

2966 where we use Eq. (A63) in the second equality. Hence, Eq. (46)  
2967 follows, where the block matrix of total effects of a mutant's envi-  
2968 ronment on her states is

$$\begin{aligned} \left. \frac{d\mathbf{x}^T}{d\boldsymbol{\epsilon}} \right|_{\mathbf{y}=\bar{\mathbf{y}}} &= \left( \begin{array}{ccc} \frac{d\mathbf{x}_1^T}{d\boldsymbol{\epsilon}_1} & \cdots & \frac{d\mathbf{x}_{N_a}^T}{d\boldsymbol{\epsilon}_1} \\ \vdots & \ddots & \vdots \\ \frac{d\mathbf{x}_1^T}{d\boldsymbol{\epsilon}_{N_a}} & \cdots & \frac{d\mathbf{x}_{N_a}^T}{d\boldsymbol{\epsilon}_{N_a}} \end{array} \right) \bigg|_{\mathbf{y}=\bar{\mathbf{y}}} \\ &= \left( \begin{array}{ccccc} 0 & \frac{d\mathbf{x}_2^T}{d\boldsymbol{\epsilon}_1} & \cdots & \frac{d\mathbf{x}_{N_a-1}^T}{d\boldsymbol{\epsilon}_1} & \frac{d\mathbf{x}_{N_a}^T}{d\boldsymbol{\epsilon}_1} \\ 0 & 0 & \cdots & \frac{d\mathbf{x}_{N_a-1}^T}{d\boldsymbol{\epsilon}_2} & \frac{d\mathbf{x}_{N_a}^T}{d\boldsymbol{\epsilon}_2} \\ \vdots & \vdots & \ddots & \vdots & \vdots \\ 0 & 0 & \cdots & 0 & \frac{d\mathbf{x}_{N_a}^T}{d\boldsymbol{\epsilon}_{N_a-1}} \\ 0 & 0 & \cdots & 0 & 0 \end{array} \right) \bigg|_{\mathbf{y}=\bar{\mathbf{y}}} \\ &\in \mathbb{R}^{N_a N_e \times N_a N_s}. \end{aligned} \quad (\text{A65})$$

2969 Eqs. (46), (A63), and (44) write the matrix of total effects of a mu-  
2970 tant's environment on her states in terms of partial derivatives.  
2971 This is a compact expression for the matrix of total effects of a  
2972 mutant's environment on her states in terms of partial deriva-  
2973 tives only.

## Conclusion

2974 **Form 1** Eq. (A58) gives the total selection gradient of the envi-  
2975 ronment as in the first line of Eq. (65). 2976

2977 **Form 2** Using Eqs. (A58) and (52) yields

$$\left. \frac{dw}{d\boldsymbol{\epsilon}} \right|_{\mathbf{y}=\bar{\mathbf{y}}} = \left[ \frac{d\mathbf{x}^T}{d\boldsymbol{\epsilon}} \frac{\partial w}{\partial \mathbf{x}} + \left( \frac{\partial \boldsymbol{\epsilon}^T}{\partial \boldsymbol{\epsilon}} + \frac{d\mathbf{x}^T}{d\boldsymbol{\epsilon}} \frac{\partial \boldsymbol{\epsilon}^T}{\partial \mathbf{x}} \right) \frac{\partial w}{\partial \boldsymbol{\epsilon}} \right] \bigg|_{\mathbf{y}=\bar{\mathbf{y}}}.$$

2978 Collecting for  $d\mathbf{x}^T / d\boldsymbol{\epsilon}$  and using Eq. (40) for  $\zeta = \mathbf{x}$  as well as  
2979 Eq. (41), we have that the total selection gradient of the environ-  
2980 ment is given by the second line of Eq. (65).

2981 **Form 3** Using the first line of Eq. (65) and Eq. (58), we obtain the  
2982 third line of Eq. (65).

2983 **Form 4** Finally, we can rearrange total selection on the environ-  
2984 ment in terms of total selection on states. Using Eq. (46) in the  
2985 second line of Eq. (65), and then using the second line of Eq. (63),  
2986 we have that the total selection gradient of the environment is  
2987 given by the fourth line of Eq. (65).

## Appendix 7: total selection gradient of the phenotype

2988 We have that the mutant phenotype is  $\mathbf{z} = (\mathbf{x}; \mathbf{y})$ . We first define  
2989 the (direct), semi-total, and total selection gradients of the phe-  
2990 notype and write the total selection gradient of the phenotype in  
2991 terms of the semi-total selection gradient of the phenotype and  
2992 of the partial selection gradient of the metaphenotype.  
2993

2994 We have the selection gradient of the phenotype

$$\left. \frac{\partial w}{\partial \mathbf{z}} \right|_{\mathbf{y}=\bar{\mathbf{y}}} \equiv \left( \frac{\partial w}{\partial \mathbf{x}}; \frac{\partial w}{\partial \mathbf{y}} \right) \bigg|_{\mathbf{y}=\bar{\mathbf{y}}} \in \mathbb{R}^{N_a(N_s+N_e) \times 1},$$

2995 the semi-total selection gradient of the phenotype

$$\left. \frac{\delta w}{\delta \mathbf{z}} \right|_{\mathbf{y}=\bar{\mathbf{y}}} \equiv \left( \frac{\delta w}{\delta \mathbf{x}}; \frac{\delta w}{\delta \mathbf{y}} \right) \bigg|_{\mathbf{y}=\bar{\mathbf{y}}} \in \mathbb{R}^{N_a(N_s+N_e) \times 1},$$

2996 and the total selection gradient of the phenotype

$$\left. \frac{dw}{d\mathbf{z}} \right|_{\mathbf{y}=\bar{\mathbf{y}}} \equiv \left( \frac{dw}{d\mathbf{x}}; \frac{dw}{d\mathbf{y}} \right) \bigg|_{\mathbf{y}=\bar{\mathbf{y}}} \in \mathbb{R}^{N_a(N_s+N_e) \times 1}.$$

2997 Now, we write the semi-total selection gradient of the phe-  
2998 notype as a linear combination of the selection gradients of the  
2999 phenotype and environment. Using Eq. (40) for  $\zeta \in \{\mathbf{x}, \mathbf{y}\}$ , we  
3000 have that the semi-total selection gradient of the phenotype is

$$\begin{aligned} \left. \frac{\delta w}{\delta \mathbf{z}} \right|_{\mathbf{y}=\bar{\mathbf{y}}} &\equiv \left( \frac{\delta w}{\delta \mathbf{x}} \right) \bigg|_{\mathbf{y}=\bar{\mathbf{y}}} = \left( \frac{\partial w}{\partial \mathbf{x}} + \frac{\partial \boldsymbol{\epsilon}^T}{\partial \mathbf{x}} \frac{\partial w}{\partial \boldsymbol{\epsilon}} \right) \bigg|_{\mathbf{y}=\bar{\mathbf{y}}} \\ &= \left[ \left( \frac{\partial w}{\partial \mathbf{x}} \right) + \left( \frac{\partial \boldsymbol{\epsilon}^T}{\partial \mathbf{x}} \frac{\partial w}{\partial \boldsymbol{\epsilon}} \right) \right] \bigg|_{\mathbf{y}=\bar{\mathbf{y}}}. \end{aligned} \quad (\text{A66})$$

3001 Using Eq. (37), we have that

$$\left( \frac{\partial \boldsymbol{\epsilon}^T}{\partial \mathbf{z}} \frac{\partial w}{\partial \boldsymbol{\epsilon}} \right) \bigg|_{\mathbf{y}=\bar{\mathbf{y}}} = \left[ \left( \frac{\partial \boldsymbol{\epsilon}^T}{\partial \mathbf{x}} \right) \frac{\partial w}{\partial \boldsymbol{\epsilon}} \right] \bigg|_{\mathbf{y}=\bar{\mathbf{y}}} = \left( \frac{\partial \boldsymbol{\epsilon}^T}{\partial \mathbf{y}} \frac{\partial w}{\partial \boldsymbol{\epsilon}} \right) \bigg|_{\mathbf{y}=\bar{\mathbf{y}}}.$$

3002 Therefore, Eq. (A66) becomes Eq. (40) for  $\zeta = \mathbf{z}$ .

3003 **Form 2** Now we bring together the total selection gradients of  
 3004 states and controls to write the total selection gradient of the  
 3005 phenotype as a linear transformation of the semi-total selection  
 3006 gradient of the phenotype.

3007 Using the third lines of Eqs. (63) and (64), we have

$$\begin{aligned} \frac{dw}{dz} \Big|_{y=\bar{y}} &\equiv \left( \frac{dw}{dx} \right) \Big|_{y=\bar{y}} = \left( \frac{dz^T \delta w}{dx \delta z} \right) \Big|_{y=\bar{y}} \\ &= \left[ \begin{array}{c} \left( \frac{dz^T}{dx} \right) \\ \left( \frac{dz^T}{dy} \right) \end{array} \frac{\delta w}{\delta z} \right] \Big|_{y=\bar{y}} = \left( \frac{dz^T \delta w}{dz \delta z} \right) \Big|_{y=\bar{y}}, \end{aligned}$$

3008 which is the second line of Eq. (66).

3009 **Form 3** Now we use the expressions of the total selection gra-  
 3010 dients of states and controls as linear transformations of the  
 3011 metaphenotype to write the total selection gradient of the phe-  
 3012 notype. Using the fourth lines of Eqs. (63) and (64), we have

$$\begin{aligned} \frac{dw}{dz} \Big|_{y=\bar{y}} &\equiv \left( \frac{dw}{dx} \right) \Big|_{y=\bar{y}} = \left( \frac{dm^T \partial w}{dx \partial m} \right) \Big|_{y=\bar{y}} \\ &= \left[ \begin{array}{c} \left( \frac{dm^T}{dx} \right) \\ \left( \frac{dm^T}{dy} \right) \end{array} \frac{\partial w}{\partial m} \right] \Big|_{y=\bar{y}} = \left( \frac{dm^T \partial w}{dz \partial m} \right) \Big|_{y=\bar{y}}, \end{aligned}$$

3013 which is the third line of Eq. (66).

3014 **Form 1** Now, we obtain the total selection gradient of the phe-  
 3015 notype as a linear combination of selection gradients of the phe-  
 3016 notype and environment. Using Eq. (40) for  $\zeta = z$ , the second line  
 3017 of Eq. (66) becomes

$$\frac{dw}{dz} \Big|_{y=\bar{y}} = \left[ \frac{dz^T}{dz} \left( \frac{\partial w}{\partial z} + \frac{\partial \epsilon^T}{\partial z} \frac{\partial w}{\partial \epsilon} \right) \right] \Big|_{y=\bar{y}}. \quad (\text{A67})$$

3018 We define the block matrix of total effects of a mutant's phe-  
 3019 notype on her environment as

$$\frac{d\epsilon^T}{dz} \Big|_{y=\bar{y}} \equiv \left( \frac{d\epsilon^T}{dx} \right) \Big|_{y=\bar{y}} \in \mathbb{R}^{N_a(N_s+N_c) \times N_a N_e},$$

3020 which using Eqs. (49) and (50) yields

$$\begin{aligned} \frac{d\epsilon^T}{dz} \Big|_{y=\bar{y}} &= \left( \frac{dz^T \partial \epsilon^T}{dx \partial z} \right) \Big|_{y=\bar{y}} = \left[ \begin{array}{c} \left( \frac{dz^T}{dx} \right) \\ \left( \frac{dz^T}{dy} \right) \end{array} \frac{\partial \epsilon^T}{\partial z} \right] \Big|_{y=\bar{y}} \\ &= \left( \frac{dz^T \partial \epsilon^T}{dz \partial z} \right) \Big|_{y=\bar{y}}, \end{aligned}$$

3021 which is Eq. (51), where in the second equality we factorized and  
 3022 in the third equality we used Eq. (55). Using this in Eq. (A67),  
 3023 the first line of Eq. (66) follows.

## Appendix 8: total selection gradient of the metapheno- type

3026 We have that the mutant metaphenotype is  $\mathbf{m} = (\mathbf{x}; \mathbf{y}; \boldsymbol{\epsilon})$ . We  
 3027 now define the (direct), semi-total, and total selection gradients  
 3028 of the metaphenotype and write the total selection gradient of  
 3029 the metaphenotype in terms of the partial selection gradient of  
 3030 the metaphenotype.

We have the *selection gradient of the metaphenotype*

$$\frac{\partial w}{\partial \mathbf{m}} \Big|_{y=\bar{y}} \equiv \left( \frac{\partial w}{\partial \mathbf{x}}; \frac{\partial w}{\partial \mathbf{y}}; \frac{\partial w}{\partial \boldsymbol{\epsilon}} \right) \Big|_{y=\bar{y}} \in \mathbb{R}^{N_a(N_s+N_c+N_e) \times 1},$$

the *semi-total selection gradient of the metaphenotype*

$$\frac{\delta w}{\delta \mathbf{m}} \Big|_{y=\bar{y}} = \left( \frac{\delta w}{\delta \mathbf{x}}; \frac{\delta w}{\delta \mathbf{y}}; \frac{\delta w}{\delta \boldsymbol{\epsilon}} \right) \Big|_{y=\bar{y}} \in \mathbb{R}^{N_a(N_s+N_c+N_e) \times 1},$$

and the *total selection gradient of the metaphenotype*

$$\frac{dw}{d\mathbf{m}} \Big|_{y=\bar{y}} = \left( \frac{dw}{d\mathbf{x}}; \frac{dw}{d\mathbf{y}}; \frac{dw}{d\boldsymbol{\epsilon}} \right) \Big|_{y=\bar{y}} \in \mathbb{R}^{N_a(N_s+N_c+N_e) \times 1}.$$

3034 Now we use the expressions of the total selection gradients  
 3035 of states, controls, and environment as linear transformations of  
 3036 the metaphenotype to write the total selection gradient of the  
 3037 metaphenotype. Using the fourth lines of Eqs. (63) and (64) and  
 3038 the third line of Eq. (65), we have

$$\begin{aligned} \frac{dw}{d\mathbf{m}} \Big|_{y=\bar{y}} &\equiv \left( \frac{dw}{d\mathbf{x}} \right) \Big|_{y=\bar{y}} = \left( \frac{dm^T \partial w}{dx \partial m} \right) \Big|_{y=\bar{y}} \\ &= \left[ \begin{array}{c} \left( \frac{dm^T}{dx} \right) \\ \left( \frac{dm^T}{dy} \right) \\ \left( \frac{dm^T}{d\boldsymbol{\epsilon}} \right) \end{array} \frac{\partial w}{\partial m} \right] \Big|_{y=\bar{y}} = \left( \frac{dm^T \partial w}{d\mathbf{m} \partial m} \right) \Big|_{y=\bar{y}}, \end{aligned}$$

3039 which is Eq. (67).

3040 To see that  $dm^T/dm|_{y=\bar{y}}$  is non-singular, we factorize it as  
 3041 follows. We define the block matrix of *direct effects of a mutant's*  
 3042 *metaphenotype on her metaphenotype considering environmental con-*  
 3043 *straints without considering developmental constraints* as

$$\begin{aligned} \frac{\gamma \mathbf{m}^T}{\gamma \mathbf{m}} \Big|_{y=\bar{y}} &= \left( \begin{array}{ccc} \mathbf{I} & \mathbf{0} & \frac{\partial \epsilon^T}{\partial \mathbf{x}} \\ \mathbf{0} & \mathbf{I} & \frac{\partial \epsilon^T}{\partial \mathbf{y}} \\ \mathbf{0} & \mathbf{0} & \frac{\partial \epsilon^T}{\partial \boldsymbol{\epsilon}} \end{array} \right) \Big|_{y=\bar{y}} \\ &\in \mathbb{R}^{N_a(N_s+N_c+N_e) \times N_a(N_s+N_c+N_e)}, \end{aligned}$$

3044 which is non-singular since it is square, block upper triangular,  
 3045 and  $\partial \epsilon^T/\partial \boldsymbol{\epsilon} = \mathbf{I}$  (Eq. 34). We also define the block matrix of *total*  
 3046 *effects of a mutant's metaphenotype on her metaphenotype considering*  
 3047 *developmental constraints but not selective environmental constraints*

3048 as

$$\frac{\beta \mathbf{m}^\top}{\beta \mathbf{m}} \Big|_{\mathbf{y}=\bar{\mathbf{y}}} = \left( \begin{array}{ccc} \frac{d\mathbf{x}^\top}{d\mathbf{x}} & \mathbf{0} & \mathbf{0} \\ \frac{d\mathbf{x}^\top}{d\mathbf{y}} & \mathbf{I} & \mathbf{0} \\ \frac{d\mathbf{x}^\top}{d\boldsymbol{\epsilon}} & \mathbf{0} & \mathbf{I} \end{array} \right) \Big|_{\mathbf{y}=\bar{\mathbf{y}}} \in \mathbb{R}^{N_a(N_s+N_c+N_e) \times N_a(N_s+N_c+N_e)},$$

3049 which is non-singular since it is square, block lower triangular,  
3050 and  $d\mathbf{x}^\top/d\mathbf{x}$  is non-singular (Eq. A32). Note that

$$\begin{aligned} \left( \frac{\beta \mathbf{m}^\top}{\beta \mathbf{m}} \frac{\gamma \mathbf{m}^\top}{\gamma \mathbf{m}} \right) \Big|_{\mathbf{y}=\bar{\mathbf{y}}} &= \left[ \left( \begin{array}{ccc} \frac{d\mathbf{x}^\top}{d\mathbf{x}} & \mathbf{0} & \mathbf{0} \\ \frac{d\mathbf{x}^\top}{d\mathbf{y}} & \mathbf{I} & \mathbf{0} \\ \frac{d\mathbf{x}^\top}{d\boldsymbol{\epsilon}} & \mathbf{0} & \mathbf{I} \end{array} \right) \left( \begin{array}{ccc} \mathbf{I} & \mathbf{0} & \frac{\partial \boldsymbol{\epsilon}^\top}{\partial \mathbf{x}} \\ \mathbf{0} & \mathbf{I} & \frac{\partial \boldsymbol{\epsilon}^\top}{\partial \mathbf{y}} \\ \mathbf{0} & \mathbf{0} & \frac{\partial \boldsymbol{\epsilon}^\top}{\partial \boldsymbol{\epsilon}} \end{array} \right) \right] \Big|_{\mathbf{y}=\bar{\mathbf{y}}} \\ &= \left( \begin{array}{ccc} \frac{d\mathbf{x}^\top}{d\mathbf{x}} & \mathbf{0} & \frac{d\mathbf{x}^\top}{d\mathbf{x}} \frac{\partial \boldsymbol{\epsilon}^\top}{\partial \mathbf{x}} \\ \frac{d\mathbf{x}^\top}{d\mathbf{y}} & \mathbf{I} & \frac{d\mathbf{x}^\top}{d\mathbf{y}} \frac{\partial \boldsymbol{\epsilon}^\top}{\partial \mathbf{x}} + \frac{\partial \boldsymbol{\epsilon}^\top}{\partial \mathbf{y}} \\ \frac{d\mathbf{x}^\top}{d\boldsymbol{\epsilon}} & \mathbf{0} & \frac{d\mathbf{x}^\top}{d\boldsymbol{\epsilon}} \frac{\partial \boldsymbol{\epsilon}^\top}{\partial \mathbf{x}} + \frac{\partial \boldsymbol{\epsilon}^\top}{\partial \boldsymbol{\epsilon}} \end{array} \right) \Big|_{\mathbf{y}=\bar{\mathbf{y}}} \\ &= \left( \begin{array}{ccc} \frac{d\mathbf{x}^\top}{d\mathbf{x}} & \mathbf{0} & \frac{d\boldsymbol{\epsilon}^\top}{d\mathbf{x}} \\ \frac{d\mathbf{x}^\top}{d\mathbf{y}} & \mathbf{I} & \frac{d\boldsymbol{\epsilon}^\top}{d\mathbf{y}} \\ \frac{d\mathbf{x}^\top}{d\boldsymbol{\epsilon}} & \mathbf{0} & \frac{d\boldsymbol{\epsilon}^\top}{d\boldsymbol{\epsilon}} \end{array} \right) \Big|_{\mathbf{y}=\bar{\mathbf{y}}}, \end{aligned}$$

3051 where the last equality follows from Eqs. (49), (50), and (52).  
3052 Using Eq. (60), we thus have that

$$\frac{d\mathbf{m}^\top}{d\mathbf{m}} \Big|_{\mathbf{y}=\bar{\mathbf{y}}} = \left( \frac{\beta \mathbf{m}^\top}{\beta \mathbf{m}} \frac{\gamma \mathbf{m}^\top}{\gamma \mathbf{m}} \right) \Big|_{\mathbf{y}=\bar{\mathbf{y}}}.$$

3053 Hence,  $d\mathbf{m}^\top/d\mathbf{m}|_{\mathbf{y}=\bar{\mathbf{y}}}$  is non-singular since  $\beta \mathbf{m}^\top/\beta \mathbf{m}|_{\mathbf{y}=\bar{\mathbf{y}}}$  and  
3054  $\gamma \mathbf{m}^\top/\gamma \mathbf{m}|_{\mathbf{y}=\bar{\mathbf{y}}}$  are square and non-singular.

### 3055 Appendix 9: evolutionary dynamics of states

3056 Here we derive an equation describing the evolutionary dynam-  
3057 ics of states.

3058 From Eqs. (14) and (27), we have that the evolutionary dy-  
3059 namics of controls satisfy the canonical equation

$$\frac{\Delta \bar{\mathbf{y}}}{\Delta \tau} = \mathbf{G}_y \frac{d\mathbf{w}}{d\mathbf{y}} \Big|_{\mathbf{y}=\bar{\mathbf{y}}}, \quad (\text{A68})$$

3060 whereas the developmental dynamics of states satisfy the devel-  
3061 opmental constraint

$$\bar{\mathbf{x}}_{a+1} = \mathbf{g}_a^\circ,$$

3062 for  $a \in \{1, \dots, N_a - 1\}$ .

3063 Let  $\bar{\mathbf{z}}(\tau)$  be the resident phenotype at evolutionary time  
3064  $\tau$ , specifically at the point where the socio-devo stable  
3065 resident is at carrying capacity, marked in Fig. 3. The  $i$ -th mu-  
3066 tant state at age  $j + 1$  at such evolutionary time  $\tau$  is  $x_{ij+1} =$

$g_{ij}(\mathbf{z}_j(\tau), \bar{\mathbf{z}}(\tau), \mathbf{h}_j(\mathbf{z}_j(\tau), \bar{\mathbf{z}}(\tau), \tau))$ . Then, evolutionary change in  
the  $i$ -th resident state variable at age  $a \in \{2, \dots, N_a\}$  is

$$\frac{\Delta \bar{x}_{ia}}{\Delta \tau} = \frac{1}{\Delta \tau} \left[ g_{i,a-1} \left( \mathbf{z}_{a-1}(\tau + \Delta \tau), \bar{\mathbf{z}}(\tau + \Delta \tau), \mathbf{h}_{a-1}(\mathbf{z}_{a-1}(\tau + \Delta \tau), \bar{\mathbf{z}}(\tau + \Delta \tau), \tau + \Delta \tau) \right) - g_{i,a-1}(\mathbf{z}_{a-1}(\tau), \bar{\mathbf{z}}(\tau), \mathbf{h}_{a-1}(\mathbf{z}_{a-1}(\tau), \bar{\mathbf{z}}(\tau), \tau)) \right] \Big|_{\mathbf{y}=\bar{\mathbf{y}}}.$$

Taking the limit as  $\Delta \tau \rightarrow 0$ , this becomes

$$\frac{d\bar{x}_{ia}}{d\tau} = \frac{dg_{i,a-1}(\mathbf{z}_{a-1}(\tau), \bar{\mathbf{z}}(\tau), \mathbf{h}_{a-1}(\mathbf{z}_{a-1}(\tau), \bar{\mathbf{z}}(\tau), \tau))}{d\tau} \Big|_{\mathbf{y}=\bar{\mathbf{y}}}.$$

Applying the chain rule, we obtain

$$\begin{aligned} \frac{d\bar{x}_{ia}}{d\tau} &= \left( \sum_{j=1}^{N_s} \frac{\partial g_{i,a-1}}{\partial x_{j,a-1}} \frac{dx_{j,a-1}}{d\tau} + \sum_{j=1}^{N_c} \frac{\partial g_{i,a-1}}{\partial y_{j,a-1}} \frac{dy_{j,a-1}}{d\tau} + \sum_{k=1}^{N_a} \sum_{j=1}^{N_s} \frac{\partial g_{i,a-1}}{\partial \bar{x}_{jk}} \frac{d\bar{x}_{jk}}{d\tau} \right. \\ &+ \sum_{k=1}^{N_a} \sum_{j=1}^{N_c} \frac{\partial g_{i,a-1}}{\partial \bar{y}_{jk}} \frac{d\bar{y}_{jk}}{d\tau} + \sum_{j=1}^{N_s} \sum_{r=1}^{N_e} \frac{\partial g_{i,a-1}}{\partial \epsilon_{r,a-1}} \frac{\partial \epsilon_{r,a-1}}{\partial x_{j,a-1}} \frac{dx_{j,a-1}}{d\tau} \\ &+ \sum_{j=1}^{N_c} \sum_{r=1}^{N_e} \frac{\partial g_{i,a-1}}{\partial \epsilon_{r,a-1}} \frac{\partial \epsilon_{r,a-1}}{\partial y_{j,a-1}} \frac{dy_{j,a-1}}{d\tau} + \sum_{k=1}^{N_a} \sum_{j=1}^{N_s} \sum_{r=1}^{N_e} \frac{\partial g_{i,a-1}}{\partial \epsilon_{r,a-1}} \frac{\partial \epsilon_{r,a-1}}{\partial \bar{x}_{jk}} \frac{d\bar{x}_{jk}}{d\tau} \\ &\left. + \sum_{k=1}^{N_a} \sum_{j=1}^{N_c} \sum_{r=1}^{N_e} \frac{\partial g_{i,a-1}}{\partial \epsilon_{r,a-1}} \frac{\partial \epsilon_{r,a-1}}{\partial \bar{y}_{jk}} \frac{d\bar{y}_{jk}}{d\tau} + \sum_{r=1}^{N_e} \frac{\partial g_{i,a-1}}{\partial \epsilon_{r,a-1}} \frac{\partial \epsilon_{r,a-1}}{\partial \tau} \right) \Big|_{\mathbf{y}=\bar{\mathbf{y}}}. \end{aligned}$$

Applying matrix calculus notation (Appendix 14), this is

$$\begin{aligned} \frac{d\bar{x}_{ia}}{d\tau} &= \left( \frac{\partial g_{i,a-1}}{\partial \mathbf{x}_{a-1}^\top} \frac{d\mathbf{x}_{a-1}}{d\tau} + \frac{\partial g_{i,a-1}}{\partial \mathbf{y}_{a-1}^\top} \frac{d\mathbf{y}_{a-1}}{d\tau} + \sum_{k=1}^{N_a} \frac{\partial g_{i,a-1}}{\partial \bar{\mathbf{x}}_k^\top} \frac{d\bar{\mathbf{x}}_k}{d\tau} \right. \\ &+ \sum_{k=1}^{N_a} \frac{\partial g_{i,a-1}}{\partial \bar{\mathbf{y}}_k^\top} \frac{d\bar{\mathbf{y}}_k}{d\tau} + \sum_{j=1}^{N_s} \frac{\partial g_{i,a-1}}{\partial \boldsymbol{\epsilon}_{a-1}^\top} \frac{d\boldsymbol{\epsilon}_{a-1}}{d\tau} \frac{d\mathbf{x}_{j,a-1}}{d\tau} \\ &+ \sum_{j=1}^{N_c} \frac{\partial g_{i,a-1}}{\partial \boldsymbol{\epsilon}_{a-1}^\top} \frac{d\boldsymbol{\epsilon}_{a-1}}{d\tau} \frac{d\mathbf{y}_{j,a-1}}{d\tau} + \sum_{k=1}^{N_a} \sum_{j=1}^{N_s} \frac{\partial g_{i,a-1}}{\partial \boldsymbol{\epsilon}_{a-1}^\top} \frac{d\boldsymbol{\epsilon}_{a-1}}{d\tau} \frac{d\bar{\mathbf{x}}_{jk}}{d\tau} \\ &\left. + \sum_{k=1}^{N_a} \sum_{j=1}^{N_c} \frac{\partial g_{i,a-1}}{\partial \boldsymbol{\epsilon}_{a-1}^\top} \frac{d\boldsymbol{\epsilon}_{a-1}}{d\tau} \frac{d\bar{\mathbf{y}}_{jk}}{d\tau} + \frac{\partial g_{i,a-1}}{\partial \boldsymbol{\epsilon}_{a-1}^\top} \frac{d\boldsymbol{\epsilon}_{a-1}}{d\tau} \right) \Big|_{\mathbf{y}=\bar{\mathbf{y}}}. \end{aligned}$$

Applying matrix calculus notation again yields

$$\begin{aligned} \frac{d\bar{x}_{ia}}{d\tau} &= \left( \frac{\partial g_{i,a-1}}{\partial \mathbf{x}_{a-1}^\top} \frac{d\mathbf{x}_{a-1}}{d\tau} + \frac{\partial g_{i,a-1}}{\partial \mathbf{y}_{a-1}^\top} \frac{d\mathbf{y}_{a-1}}{d\tau} + \frac{\partial g_{i,a-1}}{\partial \bar{\mathbf{x}}^\top} \frac{d\bar{\mathbf{x}}}{d\tau} + \frac{\partial g_{i,a-1}}{\partial \bar{\mathbf{y}}^\top} \frac{d\bar{\mathbf{y}}}{d\tau} \right. \\ &+ \frac{\partial g_{i,a-1}}{\partial \boldsymbol{\epsilon}_{a-1}^\top} \frac{d\boldsymbol{\epsilon}_{a-1}}{d\tau} \frac{d\mathbf{x}_{a-1}}{d\tau} + \frac{\partial g_{i,a-1}}{\partial \boldsymbol{\epsilon}_{a-1}^\top} \frac{d\boldsymbol{\epsilon}_{a-1}}{d\tau} \frac{d\mathbf{y}_{a-1}}{d\tau} \\ &\left. + \frac{\partial g_{i,a-1}}{\partial \boldsymbol{\epsilon}_{a-1}^\top} \frac{d\boldsymbol{\epsilon}_{a-1}}{d\tau} \frac{d\bar{\mathbf{x}}}{d\tau} + \frac{\partial g_{i,a-1}}{\partial \boldsymbol{\epsilon}_{a-1}^\top} \frac{d\boldsymbol{\epsilon}_{a-1}}{d\tau} \frac{d\bar{\mathbf{y}}}{d\tau} + \frac{\partial g_{i,a-1}}{\partial \boldsymbol{\epsilon}_{a-1}^\top} \frac{d\boldsymbol{\epsilon}_{a-1}}{d\tau} \right) \Big|_{\mathbf{y}=\bar{\mathbf{y}}}. \end{aligned}$$

3073 Factorizing, we have

$$\begin{aligned} \frac{d\bar{x}_{ia}}{d\tau} = & \left[ \left( \frac{\partial g_{i,a-1}}{\partial \mathbf{x}_{a-1}^\top} + \frac{\partial g_{i,a-1}}{\partial \boldsymbol{\epsilon}_{a-1}^\top} \frac{\partial \boldsymbol{\epsilon}_{a-1}}{\partial \mathbf{x}_{a-1}^\top} \right) \frac{d\mathbf{x}_{a-1}}{d\tau} \right. \\ & + \left( \frac{\partial g_{i,a-1}}{\partial \mathbf{y}_{a-1}^\top} + \frac{\partial g_{i,a-1}}{\partial \boldsymbol{\epsilon}_{a-1}^\top} \frac{\partial \boldsymbol{\epsilon}_{a-1}}{\partial \mathbf{y}_{a-1}^\top} \right) \frac{d\mathbf{y}_{a-1}}{d\tau} \\ & + \left( \frac{\partial g_{i,a-1}}{\partial \bar{\mathbf{x}}^\top} + \frac{\partial g_{i,a-1}}{\partial \boldsymbol{\epsilon}_{a-1}^\top} \frac{\partial \boldsymbol{\epsilon}_{a-1}}{\partial \bar{\mathbf{x}}^\top} \right) \frac{d\bar{\mathbf{x}}}{d\tau} \\ & \left. + \left( \frac{\partial g_{i,a-1}}{\partial \bar{\mathbf{y}}^\top} + \frac{\partial g_{i,a-1}}{\partial \boldsymbol{\epsilon}_{a-1}^\top} \frac{\partial \boldsymbol{\epsilon}_{a-1}}{\partial \bar{\mathbf{y}}^\top} \right) \frac{d\bar{\mathbf{y}}}{d\tau} + \frac{\partial g_{i,a-1}}{\partial \boldsymbol{\epsilon}_{a-1}^\top} \frac{\partial \boldsymbol{\epsilon}_{a-1}}{\partial \tau} \right] \Bigg|_{\mathbf{y}=\bar{\mathbf{y}}} . \end{aligned}$$

3074 Rewriting  $g_{i,a-1}$  as  $x_{ia}$  yields

$$\begin{aligned} \frac{d\bar{x}_{ia}}{d\tau} = & \left[ \left( \frac{\partial x_{ia}}{\partial \mathbf{x}_{a-1}^\top} + \frac{\partial x_{ia}}{\partial \boldsymbol{\epsilon}_{a-1}^\top} \frac{\partial \boldsymbol{\epsilon}_{a-1}}{\partial \mathbf{x}_{a-1}^\top} \right) \frac{d\mathbf{x}_{a-1}}{d\tau} \right. \\ & + \left( \frac{\partial x_{ia}}{\partial \mathbf{y}_{a-1}^\top} + \frac{\partial x_{ia}}{\partial \boldsymbol{\epsilon}_{a-1}^\top} \frac{\partial \boldsymbol{\epsilon}_{a-1}}{\partial \mathbf{y}_{a-1}^\top} \right) \frac{d\mathbf{y}_{a-1}}{d\tau} \\ & + \left( \frac{\partial x_{ia}}{\partial \bar{\mathbf{x}}^\top} + \frac{\partial x_{ia}}{\partial \boldsymbol{\epsilon}_{a-1}^\top} \frac{\partial \boldsymbol{\epsilon}_{a-1}}{\partial \bar{\mathbf{x}}^\top} \right) \frac{d\bar{\mathbf{x}}}{d\tau} \\ & \left. + \left( \frac{\partial x_{ia}}{\partial \bar{\mathbf{y}}^\top} + \frac{\partial x_{ia}}{\partial \boldsymbol{\epsilon}_{a-1}^\top} \frac{\partial \boldsymbol{\epsilon}_{a-1}}{\partial \bar{\mathbf{y}}^\top} \right) \frac{d\bar{\mathbf{y}}}{d\tau} + \frac{\partial x_{ia}}{\partial \boldsymbol{\epsilon}_{a-1}^\top} \frac{\partial \boldsymbol{\epsilon}_{a-1}}{\partial \tau} \right] \Bigg|_{\mathbf{y}=\bar{\mathbf{y}}} . \end{aligned}$$

3075 Hence, for all resident states at age  $a \in \{2, \dots, N_a\}$ , we have

$$\begin{aligned} \frac{d\bar{\mathbf{x}}_a}{d\tau} = & \left[ \left( \frac{\partial \mathbf{x}_a}{\partial \mathbf{x}_{a-1}^\top} + \frac{\partial \mathbf{x}_a}{\partial \boldsymbol{\epsilon}_{a-1}^\top} \frac{\partial \boldsymbol{\epsilon}_{a-1}}{\partial \mathbf{x}_{a-1}^\top} \right) \frac{d\mathbf{x}_{a-1}}{d\tau} \right. \\ & + \left( \frac{\partial \mathbf{x}_a}{\partial \mathbf{y}_{a-1}^\top} + \frac{\partial \mathbf{x}_a}{\partial \boldsymbol{\epsilon}_{a-1}^\top} \frac{\partial \boldsymbol{\epsilon}_{a-1}}{\partial \mathbf{y}_{a-1}^\top} \right) \frac{d\mathbf{y}_{a-1}}{d\tau} \\ & + \left( \frac{\partial \mathbf{x}_a}{\partial \bar{\mathbf{x}}^\top} + \frac{\partial \mathbf{x}_a}{\partial \boldsymbol{\epsilon}_{a-1}^\top} \frac{\partial \boldsymbol{\epsilon}_{a-1}}{\partial \bar{\mathbf{x}}^\top} \right) \frac{d\bar{\mathbf{x}}}{d\tau} \\ & \left. + \left( \frac{\partial \mathbf{x}_a}{\partial \bar{\mathbf{y}}^\top} + \frac{\partial \mathbf{x}_a}{\partial \boldsymbol{\epsilon}_{a-1}^\top} \frac{\partial \boldsymbol{\epsilon}_{a-1}}{\partial \bar{\mathbf{y}}^\top} \right) \frac{d\bar{\mathbf{y}}}{d\tau} + \frac{\partial \mathbf{x}_a}{\partial \boldsymbol{\epsilon}_{a-1}^\top} \frac{\partial \boldsymbol{\epsilon}_{a-1}}{\partial \tau} \right] \Bigg|_{\mathbf{y}=\bar{\mathbf{y}}} . \end{aligned} \quad (\text{A69})$$

3076 Here we used the following series of definitions. The matrix  
3077 of direct effects of social partner's states at age  $a$  on the mutant's states  
3078 at age  $j$  is

$$\frac{\partial \mathbf{x}_j^\top}{\partial \bar{\mathbf{x}}_a} \Bigg|_{\mathbf{y}=\bar{\mathbf{y}}} \equiv \begin{pmatrix} \frac{\partial x_{1j}}{\partial \bar{x}_{1a}} & \dots & \frac{\partial x_{N_s j}}{\partial \bar{x}_{1a}} \\ \vdots & \ddots & \vdots \\ \frac{\partial x_{1j}}{\partial \bar{x}_{N_s a}} & \dots & \frac{\partial x_{N_s j}}{\partial \bar{x}_{N_s a}} \end{pmatrix} \Bigg|_{\mathbf{y}=\bar{\mathbf{y}}} \in \mathbb{R}^{N_s \times N_s},$$

3079 and the block matrix of direct effects of social partners' states  
3080 on a mutant's states is given by Eq. (35) with  $\bar{\zeta} = \bar{\mathbf{x}}$ . The matrix  
3081  $\partial \mathbf{x}_a^\top / \partial \bar{\mathbf{x}}$  is the  $a$ -th block column of  $\partial \mathbf{x}^\top / \partial \bar{\mathbf{y}}$ .

Similarly, the matrix of direct effects of social partners' controls  
at age  $a$  on a mutant's states at age  $j$  is

$$\frac{\partial \mathbf{x}_j^\top}{\partial \bar{\mathbf{y}}_a} \Bigg|_{\mathbf{y}=\bar{\mathbf{y}}} \equiv \begin{pmatrix} \frac{\partial x_{1j}}{\partial \bar{y}_{1a}} & \dots & \frac{\partial x_{N_s j}}{\partial \bar{y}_{1a}} \\ \vdots & \ddots & \vdots \\ \frac{\partial x_{1j}}{\partial \bar{y}_{N_c a}} & \dots & \frac{\partial x_{N_s j}}{\partial \bar{y}_{N_c a}} \end{pmatrix} \Bigg|_{\mathbf{y}=\bar{\mathbf{y}}} \in \mathbb{R}^{N_c \times N_s},$$

and the block matrix of direct effects of social partners' controls  
on a mutant's states is given by Eq. (35) with  $\bar{\zeta} = \bar{\mathbf{y}}$ . The matrix  
 $\partial \mathbf{x}_a^\top / \partial \bar{\mathbf{y}}$  is the  $a$ -th block column of  $\partial \mathbf{x}^\top / \partial \bar{\mathbf{y}}$ .

In turn, the matrix of direct effects of social partners' states at age  
 $a$  on a mutant's environment at age  $j$  is

$$\frac{\partial \boldsymbol{\epsilon}_j^\top}{\partial \bar{\mathbf{x}}_a} \Bigg|_{\mathbf{y}=\bar{\mathbf{y}}} \equiv \begin{pmatrix} \frac{\partial \epsilon_{1j}}{\partial \bar{x}_{1a}} & \dots & \frac{\partial \epsilon_{N_e j}}{\partial \bar{x}_{1a}} \\ \vdots & \ddots & \vdots \\ \frac{\partial \epsilon_{1j}}{\partial \bar{x}_{N_s a}} & \dots & \frac{\partial \epsilon_{N_e j}}{\partial \bar{x}_{N_s a}} \end{pmatrix} \Bigg|_{\mathbf{y}=\bar{\mathbf{y}}} \in \mathbb{R}^{N_e \times N_s},$$

and the block matrix of direct effects of social partners' states  
on a mutant's environment is given by Eq. (36) with  $\bar{\zeta} = \bar{\mathbf{x}}$ . The  
matrix  $\partial \boldsymbol{\epsilon}_a^\top / \partial \bar{\mathbf{x}}$  is the  $a$ -th block column of  $\partial \boldsymbol{\epsilon}^\top / \partial \bar{\mathbf{x}}$ .

Similarly, the matrix of direct effects of social partners' controls  
at age  $a$  on a mutant's environment at age  $j$  is

$$\frac{\partial \boldsymbol{\epsilon}_j^\top}{\partial \bar{\mathbf{y}}_a} \Bigg|_{\mathbf{y}=\bar{\mathbf{y}}} \equiv \begin{pmatrix} \frac{\partial \epsilon_{1j}}{\partial \bar{y}_{1a}} & \dots & \frac{\partial \epsilon_{N_e j}}{\partial \bar{y}_{1a}} \\ \vdots & \ddots & \vdots \\ \frac{\partial \epsilon_{1j}}{\partial \bar{y}_{N_c a}} & \dots & \frac{\partial \epsilon_{N_e j}}{\partial \bar{y}_{N_c a}} \end{pmatrix} \Bigg|_{\mathbf{y}=\bar{\mathbf{y}}} \in \mathbb{R}^{N_e \times N_c},$$

and the block matrix of direct effects of social partners' controls on a  
mutant's environment is given by Eq. (36) with  $\bar{\zeta} = \bar{\mathbf{y}}$ . The matrix  
 $\partial \boldsymbol{\epsilon}_a^\top / \partial \bar{\mathbf{y}}$  is the  $a$ -th block column of  $\partial \boldsymbol{\epsilon}^\top / \partial \bar{\mathbf{y}}$ .

Having made these definitions explicit, we now write  
Eq. (A69) as

$$\begin{aligned} \frac{d\bar{\mathbf{x}}_a}{d\tau} = & \left( \frac{\delta \mathbf{x}_a}{\delta \mathbf{x}_{a-1}^\top} \frac{d\mathbf{x}_{a-1}}{d\tau} + \frac{\delta \mathbf{x}_a}{\delta \mathbf{y}_{a-1}^\top} \frac{d\mathbf{y}_{a-1}}{d\tau} \right. \\ & \left. + \frac{\delta \mathbf{x}_a}{\delta \bar{\mathbf{x}}^\top} \frac{d\bar{\mathbf{x}}}{d\tau} + \frac{\delta \mathbf{x}_a}{\delta \bar{\mathbf{y}}^\top} \frac{d\bar{\mathbf{y}}}{d\tau} + \frac{\delta \mathbf{x}_a}{\delta \boldsymbol{\epsilon}_{a-1}^\top} \frac{\partial \boldsymbol{\epsilon}_{a-1}}{\partial \tau} \right) \Bigg|_{\mathbf{y}=\bar{\mathbf{y}}} , \end{aligned} \quad (\text{A70})$$

where we used the transpose of the semi-total effects of a mutant's  
states and controls on her states (Eqs. A27 and A47), and the the matrix of  
semi-total effects of social partners' states or controls  
at age  $a$  on a mutant's states at age  $j$

$$\frac{\delta \mathbf{x}_j^\top}{\delta \bar{\zeta}_a} \Bigg|_{\mathbf{y}=\bar{\mathbf{y}}} = \begin{cases} \left( \frac{\partial \mathbf{x}_j^\top}{\partial \bar{\zeta}_a} + \frac{\partial \boldsymbol{\epsilon}_{j-1}^\top}{\partial \bar{\zeta}_a} \frac{\partial \boldsymbol{\epsilon}_{j-1}}{\partial \mathbf{x}_{j-1}^\top} \right) \Bigg|_{\mathbf{y}=\bar{\mathbf{y}}} & \text{for } j > 1 \\ \mathbf{0} & \text{for } j = 1, \end{cases} \quad (\text{A71})$$

for  $\bar{\zeta} \in \{\bar{\mathbf{x}}, \bar{\mathbf{y}}\}$  since the initial states  $\mathbf{x}_1$  are constant by assumption.  
We also define the corresponding matrix of semi-total effects  
of social partners' states on a mutant's states as

$$\frac{\delta \mathbf{x}^\top}{\delta \bar{\zeta}} \Bigg|_{\mathbf{y}=\bar{\mathbf{y}}} \equiv \begin{pmatrix} \frac{\delta \mathbf{x}_1^\top}{\delta \bar{\zeta}_1} & \dots & \frac{\delta \mathbf{x}_{N_a}^\top}{\delta \bar{\zeta}_1} \\ \vdots & \ddots & \vdots \\ \frac{\delta \mathbf{x}_1^\top}{\delta \bar{\zeta}_{N_a}} & \dots & \frac{\delta \mathbf{x}_{N_a}^\top}{\delta \bar{\zeta}_{N_a}} \end{pmatrix} \Bigg|_{\mathbf{y}=\bar{\mathbf{y}}}$$

$$= \begin{pmatrix} 0 & \frac{\delta \mathbf{x}_2^\top}{\delta \zeta_1} & \dots & \frac{\delta \mathbf{x}_{N_a}^\top}{\delta \zeta_1} \\ 0 & \frac{\delta \mathbf{x}_2^\top}{\delta \zeta_1} & \dots & \frac{\delta \mathbf{x}_{N_a}^\top}{\delta \zeta_1} \\ \vdots & \vdots & \ddots & \vdots \\ 0 & \frac{\delta \mathbf{x}_2^\top}{\delta \zeta_{N_a}} & \dots & \frac{\delta \mathbf{x}_{N_a}^\top}{\delta \zeta_{N_a}} \end{pmatrix} \Bigg|_{\mathbf{y}=\bar{\mathbf{y}}}, \quad (\text{A72})$$

3106 for  $\bar{\zeta} \in \{\bar{\mathbf{x}}, \bar{\mathbf{y}}\}$ . The matrix  $\delta \mathbf{x}_a^\top / \delta \bar{\zeta}$  is the  $a$ -th block column of  
3107  $\delta \mathbf{x}^\top / \delta \bar{\zeta}$ . Using Eq. (33c) and since the initial states  $\mathbf{x}_1$  are constant  
3108 by assumption, we have that

$$\frac{\partial \mathbf{e}^\top}{\partial \bar{\zeta}} \frac{\partial \mathbf{x}^\top}{\partial \mathbf{e}} = \left( \sum_{k=1}^{N_a} \frac{\partial \mathbf{e}_k^\top}{\partial \zeta_a} \frac{\partial \mathbf{x}_j^\top}{\partial \mathbf{e}_k} \right) = \begin{cases} \frac{\partial \mathbf{e}_{j-1}^\top}{\partial \zeta_a} \frac{\partial \mathbf{x}_j^\top}{\partial \mathbf{e}_{j-1}} & \text{for } j > 1 \\ \mathbf{0} & \text{for } j = 1 \end{cases}, \quad (\text{A73})$$

3109 for  $\bar{\zeta} \in \{\bar{\mathbf{x}}, \bar{\mathbf{y}}\}$ , which equals the rightmost terms in Eqs. (A71).  
3110 Thus, from Eqs. (A71), (A72), and (A73), it follows that the block  
3111 matrix of semi-total effects of social partners' states or controls  
3112 on a mutant's states satisfies Eq. (42).

3113 Noting that  $\delta \mathbf{x}_a / \delta \bar{\mathbf{z}}^\top = (\delta \mathbf{x}_a / \delta \bar{\mathbf{x}}^\top, \delta \mathbf{x}_a / \delta \bar{\mathbf{y}}^\top)$  and that evalu-  
3114 ation of  $d\mathbf{z}_a / d\tau$  and  $\partial \bar{\mathbf{e}}_a / \partial \tau$  at  $\mathbf{y} = \bar{\mathbf{y}}$  is  $d\bar{\mathbf{z}}_a / d\tau$  and  $\partial \bar{\mathbf{e}}_a / \partial \tau$   
3115 respectively, Eq. (A70) can be written as

$$\frac{d\bar{\mathbf{x}}_a}{d\tau} = \left( \frac{\delta \mathbf{x}_a}{\delta \mathbf{x}_{a-1}^\top} \frac{d\bar{\mathbf{x}}_{a-1}}{d\tau} + \frac{\delta \mathbf{x}_a}{\delta \mathbf{y}_{a-1}^\top} \frac{d\bar{\mathbf{y}}_{a-1}}{d\tau} + \frac{\delta \mathbf{x}_a}{\delta \bar{\mathbf{z}}^\top} \frac{d\bar{\mathbf{z}}}{d\tau} + \frac{\delta \mathbf{x}_a}{\delta \mathbf{e}_{a-1}^\top} \frac{\partial \bar{\mathbf{e}}_{a-1}}{\partial \tau} \right) \Bigg|_{\mathbf{y}=\bar{\mathbf{y}}},$$

3116 which is a recursion for  $d\bar{\mathbf{x}}_a / d\tau$  over  $a$ . Expanding this recursion  
3117 two steps yields

$$\begin{aligned} \frac{d\bar{\mathbf{x}}_a}{d\tau} = & \left\{ \frac{\delta \mathbf{x}_a}{\delta \mathbf{x}_{a-1}^\top} \left[ \frac{\delta \mathbf{x}_{a-1}}{\delta \mathbf{x}_{a-2}^\top} \left( \frac{\delta \mathbf{x}_{a-2}}{\delta \mathbf{x}_{a-3}^\top} \frac{d\bar{\mathbf{x}}_{a-3}}{d\tau} + \frac{\delta \mathbf{x}_{a-2}}{\delta \mathbf{y}_{a-3}^\top} \frac{d\bar{\mathbf{y}}_{a-3}}{d\tau} \right. \right. \right. \\ & \left. \left. \left. + \frac{\delta \mathbf{x}_{a-2}}{\delta \bar{\mathbf{z}}^\top} \frac{d\bar{\mathbf{z}}}{d\tau} + \frac{\delta \mathbf{x}_{a-2}}{\delta \mathbf{e}_{a-3}^\top} \frac{\partial \bar{\mathbf{e}}_{a-3}}{\partial \tau} \right) \right. \right. \\ & \left. \left. + \frac{\delta \mathbf{x}_{a-1}}{\delta \mathbf{y}_{a-1}^\top} \frac{d\bar{\mathbf{y}}_{a-2}}{d\tau} + \frac{\delta \mathbf{x}_{a-1}}{\delta \bar{\mathbf{z}}^\top} \frac{d\bar{\mathbf{z}}}{d\tau} + \frac{\delta \mathbf{x}_{a-1}}{\delta \mathbf{e}_{a-2}^\top} \frac{\partial \bar{\mathbf{e}}_{a-2}}{\partial \tau} \right] \right. \\ & \left. \left. + \frac{\delta \mathbf{x}_a}{\delta \mathbf{y}_{a-1}^\top} \frac{d\bar{\mathbf{y}}_{a-1}}{d\tau} + \frac{\delta \mathbf{x}_a}{\delta \bar{\mathbf{z}}^\top} \frac{d\bar{\mathbf{z}}}{d\tau} + \frac{\delta \mathbf{x}_a}{\delta \mathbf{e}_{a-1}^\top} \frac{\partial \bar{\mathbf{e}}_{a-1}}{\partial \tau} \right\} \Bigg|_{\mathbf{y}=\bar{\mathbf{y}}}. \end{aligned}$$

3118 Collecting the derivatives with respect to  $\tau$  yields

$$\begin{aligned} \frac{d\bar{\mathbf{x}}_a}{d\tau} = & \left[ \left( \frac{\delta \mathbf{x}_a}{\delta \mathbf{x}_{a-1}^\top} \frac{\delta \mathbf{x}_{a-1}}{\delta \mathbf{x}_{a-2}^\top} \frac{\delta \mathbf{x}_{a-2}}{\delta \mathbf{x}_{a-3}^\top} \right) \frac{d\bar{\mathbf{x}}_{a-3}}{d\tau} \right. \\ & + \left( \frac{\delta \mathbf{x}_a}{\delta \mathbf{x}_{a-1}^\top} \frac{\delta \mathbf{x}_{a-1}}{\delta \mathbf{x}_{a-2}^\top} \frac{\delta \mathbf{x}_{a-2}}{\delta \mathbf{y}_{a-3}^\top} \right) \frac{d\bar{\mathbf{y}}_{a-3}}{d\tau} \\ & + \left( \frac{\delta \mathbf{x}_a}{\delta \mathbf{x}_{a-1}^\top} \frac{\delta \mathbf{x}_{a-1}}{\delta \mathbf{y}_{a-1}^\top} \right) \frac{d\bar{\mathbf{y}}_{a-2}}{d\tau} + \frac{\delta \mathbf{x}_a}{\delta \mathbf{y}_{a-1}^\top} \frac{d\bar{\mathbf{y}}_{a-1}}{d\tau} \\ & \left. + \left( \frac{\delta \mathbf{x}_a}{\delta \mathbf{x}_{a-1}^\top} \frac{\delta \mathbf{x}_{a-1}}{\delta \mathbf{x}_{a-2}^\top} \frac{\delta \mathbf{x}_{a-2}}{\delta \mathbf{e}_{a-3}^\top} \right) \frac{\partial \bar{\mathbf{e}}_{a-3}}{\partial \tau} \right] \end{aligned}$$

$$\begin{aligned} & + \left( \frac{\delta \mathbf{x}_a}{\delta \mathbf{x}_{a-1}^\top} \frac{\delta \mathbf{x}_{a-1}}{\delta \mathbf{e}_{a-2}^\top} \right) \frac{\partial \bar{\mathbf{e}}_{a-2}}{\partial \tau} + \frac{\delta \mathbf{x}_a}{\delta \mathbf{e}_{a-1}^\top} \frac{\partial \bar{\mathbf{e}}_{a-1}}{\partial \tau} \\ & + \left( \frac{\delta \mathbf{x}_a}{\delta \mathbf{x}_{a-1}^\top} \frac{\delta \mathbf{x}_{a-1}}{\delta \mathbf{x}_{a-2}^\top} \frac{\delta \mathbf{x}_{a-2}}{\delta \bar{\mathbf{z}}^\top} + \frac{\delta \mathbf{x}_a}{\delta \mathbf{x}_{a-1}^\top} \frac{\delta \mathbf{x}_{a-1}}{\delta \bar{\mathbf{z}}^\top} + \frac{\delta \mathbf{x}_a}{\delta \bar{\mathbf{z}}^\top} \right) \frac{d\bar{\mathbf{z}}}{d\tau} \Bigg|_{\mathbf{y}=\bar{\mathbf{y}}}. \end{aligned}$$

Inspection shows that by expanding the recursion completely  
and since we assume that initial states do not evolve (i.e.,  
 $d\bar{\mathbf{x}}_1 / d\tau = \mathbf{0}$ ), the resulting expression can be succinctly written  
as

$$\begin{aligned} \frac{d\bar{\mathbf{x}}_a}{d\tau} = & \left( \sum_{j=1}^{a-1} \overset{\curvearrowright}{\prod}_{k=j+1}^{a-1} \frac{\delta \mathbf{x}_{k+1}}{\delta \mathbf{x}_k^\top} \frac{\delta \mathbf{x}_{j+1}}{\delta \mathbf{y}_j^\top} \frac{d\bar{\mathbf{y}}_j}{d\tau} \right. \\ & + \sum_{j=1}^{a-1} \overset{\curvearrowright}{\prod}_{k=j+1}^{a-1} \frac{\delta \mathbf{x}_{k+1}}{\delta \mathbf{x}_k^\top} \frac{\delta \mathbf{x}_{j+1}}{\delta \mathbf{e}_j^\top} \frac{\partial \bar{\mathbf{e}}_j}{\partial \tau} \\ & \left. + \sum_{j=1}^{a-1} \overset{\curvearrowright}{\prod}_{k=j+1}^{a-1} \frac{\delta \mathbf{x}_{k+1}}{\delta \mathbf{x}_k^\top} \frac{\delta \mathbf{x}_{j+1}}{\delta \bar{\mathbf{z}}^\top} \frac{d\bar{\mathbf{z}}}{d\tau} \right) \Bigg|_{\mathbf{y}=\bar{\mathbf{y}}}, \end{aligned}$$

where the  $\curvearrowright$  denotes left multiplication. Note that the products  
over  $k$  are the transpose of the total effects of a mutant's states at  
age  $j+1$  on her states at age  $a$  (Eq. A33). Hence,

$$\begin{aligned} \frac{d\bar{\mathbf{x}}_a}{d\tau} = & \left( \sum_{j=1}^{a-1} \frac{d\mathbf{x}_a}{d\mathbf{x}_{j+1}^\top} \frac{\delta \mathbf{x}_{j+1}}{\delta \mathbf{y}_j^\top} \frac{d\bar{\mathbf{y}}_j}{d\tau} + \sum_{j=1}^{a-1} \frac{d\mathbf{x}_a}{d\mathbf{x}_{j+1}^\top} \frac{\delta \mathbf{x}_{j+1}}{\delta \mathbf{e}_j^\top} \frac{\partial \bar{\mathbf{e}}_j}{\partial \tau} \right. \\ & \left. + \sum_{j=1}^{a-1} \frac{d\mathbf{x}_a}{d\mathbf{x}_{j+1}^\top} \frac{\delta \mathbf{x}_{j+1}}{\delta \bar{\mathbf{z}}^\top} \frac{d\bar{\mathbf{z}}}{d\tau} \right) \Bigg|_{\mathbf{y}=\bar{\mathbf{y}}}. \quad (\text{A74}) \end{aligned}$$

Before simplifying Eq. (A74), we introduce a series of matrices that are analogous to those already provided, based on  
Eq. (A55). The matrix of *total effects of social partners' states or controls at age  $a$  on a mutant's states at age  $j$*  is

$$\frac{d\mathbf{x}_j^\top}{d\zeta_a} \Bigg|_{\mathbf{y}=\bar{\mathbf{y}}} = \begin{cases} \sum_{l=1}^{N_a} \left( \frac{\delta \mathbf{x}_l^\top}{\delta \zeta_a} \frac{d\mathbf{x}_j^\top}{d\mathbf{x}_l} \right) \Bigg|_{\mathbf{y}=\bar{\mathbf{y}}} & \text{for } j > 1 \\ \mathbf{0} & \text{for } j = 1, \end{cases} \quad (\text{A75})$$

for  $\bar{\zeta} \in \{\bar{\mathbf{x}}, \bar{\mathbf{y}}\}$ . The block matrix of *total effects of social partners' states or controls on a mutant's states* is thus

$$\begin{aligned} \frac{d\mathbf{x}^\top}{d\bar{\zeta}} \Bigg|_{\mathbf{y}=\bar{\mathbf{y}}} & \equiv \begin{pmatrix} \frac{d\mathbf{x}_1^\top}{d\zeta_1} & \dots & \frac{d\mathbf{x}_{N_a}^\top}{d\zeta_1} \\ \vdots & \ddots & \vdots \\ \frac{d\mathbf{x}_1^\top}{d\zeta_{N_a}} & \dots & \frac{d\mathbf{x}_{N_a}^\top}{d\zeta_{N_a}} \end{pmatrix} \Bigg|_{\mathbf{y}=\bar{\mathbf{y}}} \\ & = \begin{pmatrix} \mathbf{0} & \frac{d\mathbf{x}_2^\top}{d\zeta_1} & \dots & \frac{d\mathbf{x}_{N_a}^\top}{d\zeta_1} \\ \mathbf{0} & \frac{d\mathbf{x}_2^\top}{d\zeta_2} & \dots & \frac{d\mathbf{x}_{N_a}^\top}{d\zeta_2} \\ \vdots & \vdots & \ddots & \vdots \\ \mathbf{0} & \frac{d\mathbf{x}_2^\top}{d\zeta_{N_a}} & \dots & \frac{d\mathbf{x}_{N_a}^\top}{d\zeta_{N_a}} \end{pmatrix} \Bigg|_{\mathbf{y}=\bar{\mathbf{y}}}, \quad (\text{A76}) \end{aligned}$$

for  $\bar{\zeta} \in \{\bar{\mathbf{x}}, \bar{\mathbf{y}}\}$ . Then, from Eq. (A75), the block matrix in  
Eq. (A76) satisfies Eq. (47).

3134 Using Eqs. (A55) and (A64) and given the property of trans-  
3135 pose of a product (i.e.,  $(\mathbf{AB})^T = \mathbf{B}^T \mathbf{A}^T$ ), Eq. (A74) can be written  
3136 more succinctly as

$$\frac{d\bar{\mathbf{x}}_a}{d\tau} = \left( \sum_{j=1}^{a-1} \frac{d\mathbf{x}_a}{d\mathbf{y}_j^T} \frac{d\bar{\mathbf{y}}_j}{d\tau} + \sum_{j=1}^{a-1} \frac{d\mathbf{x}_a}{d\mathbf{e}_j^T} \frac{\partial \bar{\mathbf{e}}_j}{\partial \tau} + \sum_{j=1}^{a-1} \frac{d\mathbf{x}_a}{d\mathbf{x}_{j+1}^T} \frac{\delta \mathbf{x}_{j+1}}{\delta \bar{\mathbf{z}}^T} \frac{d\bar{\mathbf{z}}}{d\tau} \right) \Big|_{\mathbf{y}=\bar{\mathbf{y}}}.$$

3137 Note that from Eq. (A54), we have that  $d\mathbf{x}_a/d\mathbf{y}_j^T = \mathbf{0}$  for  $j \geq a$ ,  
3138 from Eq. (A65), we have that  $d\mathbf{x}_a/d\mathbf{e}_j^T = \mathbf{0}$  for  $j \geq a$ , and from  
3139 Eq. (A32), we have that  $d\mathbf{x}_a/d\mathbf{x}_{j+1}^T = \mathbf{0}$  for  $j+1 \geq a$ . Hence, the  
3140 same expression holds extending the upper bounds of the sums  
3141 to the last possible age:

$$\frac{d\bar{\mathbf{x}}_a}{d\tau} = \left( \sum_{j=1}^{N_a} \frac{d\mathbf{x}_a}{d\mathbf{y}_j^T} \frac{d\bar{\mathbf{y}}_j}{d\tau} + \sum_{j=1}^{N_a} \frac{d\mathbf{x}_a}{d\mathbf{e}_j^T} \frac{\partial \bar{\mathbf{e}}_j}{\partial \tau} + \sum_{j=1}^{N_a-1} \frac{d\mathbf{x}_a}{d\mathbf{x}_{j+1}^T} \frac{\delta \mathbf{x}_{j+1}}{\delta \bar{\mathbf{z}}^T} \frac{d\bar{\mathbf{z}}}{d\tau} \right) \Big|_{\mathbf{y}=\bar{\mathbf{y}}}.$$

3142 Changing the sum index for the last terms yields

$$\frac{d\bar{\mathbf{x}}_a}{d\tau} = \left( \sum_{j=1}^{N_a} \frac{d\mathbf{x}_a}{d\mathbf{y}_j^T} \frac{d\bar{\mathbf{y}}_j}{d\tau} + \sum_{j=1}^{N_a} \frac{d\mathbf{x}_a}{d\mathbf{e}_j^T} \frac{\partial \bar{\mathbf{e}}_j}{\partial \tau} + \sum_{j=2}^{N_a} \frac{d\mathbf{x}_a}{d\mathbf{x}_j^T} \frac{\delta \mathbf{x}_j}{\delta \bar{\mathbf{z}}^T} \frac{d\bar{\mathbf{z}}}{d\tau} \right) \Big|_{\mathbf{y}=\bar{\mathbf{y}}}.$$

3143 Expanding the matrix calculus notation for the entries of  $\bar{\mathbf{z}}$  in the  
3144 rightmost term yields

$$\frac{d\bar{\mathbf{x}}_a}{d\tau} = \left( \sum_{j=1}^{N_a} \frac{d\mathbf{x}_a}{d\mathbf{y}_j^T} \frac{d\bar{\mathbf{y}}_j}{d\tau} + \sum_{j=1}^{N_a} \frac{d\mathbf{x}_a}{d\mathbf{e}_j^T} \frac{\partial \bar{\mathbf{e}}_j}{\partial \tau} + \sum_{j=2}^{N_a} \frac{d\mathbf{x}_a}{d\mathbf{x}_j^T} \frac{\delta \mathbf{x}_j}{\delta \bar{\mathbf{x}}^T} \frac{d\bar{\mathbf{x}}}{d\tau} + \sum_{j=2}^{N_a} \frac{d\mathbf{x}_a}{d\mathbf{x}_j^T} \frac{\delta \mathbf{x}_j}{\delta \bar{\mathbf{y}}^T} \frac{d\bar{\mathbf{y}}}{d\tau} \right) \Big|_{\mathbf{y}=\bar{\mathbf{y}}}.$$

3145 Expanding again the matrix calculus notation for the entries of  $\bar{\mathbf{x}}$   
3146 and  $\bar{\mathbf{y}}$  in the two rightmost terms yields

$$\frac{d\bar{\mathbf{x}}_a}{d\tau} = \left( \sum_{j=1}^{N_a} \frac{d\mathbf{x}_a}{d\mathbf{y}_j^T} \frac{d\bar{\mathbf{y}}_j}{d\tau} + \sum_{j=1}^{N_a} \frac{d\mathbf{x}_a}{d\mathbf{e}_j^T} \frac{\partial \bar{\mathbf{e}}_j}{\partial \tau} + \sum_{l=1}^{N_a} \sum_{j=2}^{N_a} \frac{d\mathbf{x}_a}{d\mathbf{x}_j^T} \frac{\delta \mathbf{x}_j}{\delta \bar{\mathbf{x}}_l^T} \frac{d\bar{\mathbf{x}}_l}{d\tau} + \sum_{l=1}^{N_a} \sum_{j=2}^{N_a} \frac{d\mathbf{x}_a}{d\mathbf{x}_j^T} \frac{\delta \mathbf{x}_j}{\delta \bar{\mathbf{y}}_l^T} \frac{d\bar{\mathbf{y}}_l}{d\tau} \right) \Big|_{\mathbf{y}=\bar{\mathbf{y}}}.$$

3147 Using the transpose of the matrix in Eq. (A75) in the two right-  
3148 most terms, noting that  $\delta \mathbf{x}_j/\delta \bar{\mathbf{x}}_l^T = \mathbf{0}$  and  $\delta \mathbf{x}_j/\delta \bar{\mathbf{y}}_l^T = \mathbf{0}$  for  $j = 1$   
3149 (from Eq. A72), yields

$$\frac{d\bar{\mathbf{x}}_a}{d\tau} = \left( \sum_{j=1}^{N_a} \frac{d\mathbf{x}_a}{d\mathbf{y}_j^T} \frac{d\bar{\mathbf{y}}_j}{d\tau} + \sum_{j=1}^{N_a} \frac{d\mathbf{x}_a}{d\mathbf{e}_j^T} \frac{\partial \bar{\mathbf{e}}_j}{\partial \tau} + \sum_{l=1}^{N_a} \frac{d\mathbf{x}_a}{d\bar{\mathbf{x}}_l^T} \frac{d\bar{\mathbf{x}}_l}{d\tau} + \sum_{l=1}^{N_a} \frac{d\mathbf{x}_a}{d\bar{\mathbf{y}}_l^T} \frac{d\bar{\mathbf{y}}_l}{d\tau} \right) \Big|_{\mathbf{y}=\bar{\mathbf{y}}}.$$

3150 Applying matrix calculus notation to each term yields

$$\frac{d\bar{\mathbf{x}}_a}{d\tau} = \left( \frac{d\mathbf{x}_a}{d\mathbf{y}^T} \frac{d\bar{\mathbf{y}}}{d\tau} + \frac{d\mathbf{x}_a}{d\mathbf{e}^T} \frac{\partial \bar{\mathbf{e}}}{\partial \tau} + \frac{d\mathbf{x}_a}{d\bar{\mathbf{x}}^T} \frac{d\bar{\mathbf{x}}}{d\tau} + \frac{d\mathbf{x}_a}{d\bar{\mathbf{y}}^T} \frac{d\bar{\mathbf{y}}}{d\tau} \right) \Big|_{\mathbf{y}=\bar{\mathbf{y}}},$$

for  $a \in \{2, \dots, N_a\}$ . Since  $d\bar{\mathbf{x}}_1/d\tau = \mathbf{0}$ , it follows that

$$\frac{d\bar{\mathbf{x}}}{d\tau} = \left( \frac{d\mathbf{x}}{d\mathbf{y}^T} \frac{d\bar{\mathbf{y}}}{d\tau} + \frac{d\mathbf{x}}{d\mathbf{e}^T} \frac{\partial \bar{\mathbf{e}}}{\partial \tau} + \frac{d\mathbf{x}}{d\bar{\mathbf{x}}^T} \frac{d\bar{\mathbf{x}}}{d\tau} + \frac{d\mathbf{x}}{d\bar{\mathbf{y}}^T} \frac{d\bar{\mathbf{y}}}{d\tau} \right) \Big|_{\mathbf{y}=\bar{\mathbf{y}}}, \quad (\text{A77})$$

3152 which contains our desired  $d\bar{\mathbf{x}}/d\tau$  on both sides of the equation.

3153 The matrix premultiplying  $d\bar{\mathbf{x}}/d\tau$  on the right-hand side of  
3154 Eq. (A77) is  $d\mathbf{x}/d\bar{\mathbf{x}}^T|_{\mathbf{y}=\bar{\mathbf{y}}}$ , which is square. We now make use of  
3155 our assumption that the absolute value of all the eigenvalues of  
3156  $d\mathbf{x}/d\bar{\mathbf{x}}^T|_{\mathbf{y}=\bar{\mathbf{y}}}$  is strictly less than one, which guarantees that the  
3157 resident phenotype is socio-devo stable (Appendix 15). Given  
3158 this property of  $d\mathbf{x}/d\bar{\mathbf{x}}^T|_{\mathbf{y}=\bar{\mathbf{y}}}$ , then  $\mathbf{I} - d\mathbf{x}/d\bar{\mathbf{x}}^T|_{\mathbf{y}=\bar{\mathbf{y}}}$  is invertible.  
3159 Hence, we can define the transpose of the matrix of *stabilized*  
3160 *effects of a focal individual's states on a social partners' states* (second  
3161 equality of Eq. 68). Thus, solving for  $d\bar{\mathbf{x}}/d\tau$  in Eq. (A77), we  
3162 finally obtain an equation describing the evolutionary dynamics  
3163 of states

$$\frac{d\bar{\mathbf{x}}}{d\tau} = \left[ \frac{s\mathbf{x}}{s\bar{\mathbf{x}}^T} \left( \frac{d\mathbf{x}}{d\mathbf{y}^T} + \frac{d\mathbf{x}}{d\bar{\mathbf{y}}^T} \right) \frac{d\bar{\mathbf{y}}}{d\tau} + \frac{s\mathbf{x}}{s\bar{\mathbf{x}}^T} \frac{d\mathbf{x}}{d\mathbf{e}^T} \frac{\partial \bar{\mathbf{e}}}{\partial \tau} \right] \Big|_{\mathbf{y}=\bar{\mathbf{y}}}.$$

3164 Let us momentarily write  $\mathbf{x} = \tilde{\mathbf{g}}(\mathbf{y}, \bar{\mathbf{y}})$  for some differentiable  
3165 function  $\tilde{\mathbf{g}}$  to highlight the dependence of a mutant's states  $\mathbf{x}$  on  
3166 her controls  $\mathbf{y}$  and on the controls  $\bar{\mathbf{y}}$  of resident social partners.  
3167 Consider the resident states that develop in the context of mutant  
3168 controls, denoted by  $\check{\mathbf{x}} = \tilde{\mathbf{g}}(\bar{\mathbf{y}}, \mathbf{y})$ . Hence,

$$\frac{d\check{\mathbf{x}}}{d\mathbf{y}^T} \Big|_{\mathbf{y}=\bar{\mathbf{y}}} = \frac{d\tilde{\mathbf{g}}(\bar{\mathbf{y}}, \mathbf{y})}{d\mathbf{y}^T} \Big|_{\mathbf{y}=\bar{\mathbf{y}}} = \frac{d\tilde{\mathbf{g}}(\mathbf{y}, \bar{\mathbf{y}})}{d\bar{\mathbf{y}}^T} \Big|_{\mathbf{y}=\bar{\mathbf{y}}} = \frac{d\mathbf{x}}{d\bar{\mathbf{y}}^T} \Big|_{\mathbf{y}=\bar{\mathbf{y}}}, \quad (\text{A78})$$

3169 where the second equality follows by exchanging dummy vari-  
3170 ables. Then, the transpose of the matrix of *total social effects of a*  
3171 *mutant's controls on her and a partner's states is*

$$\frac{d(\mathbf{x} + \check{\mathbf{x}})}{d\mathbf{y}^T} \Big|_{\mathbf{y}=\bar{\mathbf{y}}} = \left( \frac{d\mathbf{x}}{d\mathbf{y}^T} + \frac{d\check{\mathbf{x}}}{d\mathbf{y}^T} \right) \Big|_{\mathbf{y}=\bar{\mathbf{y}}} = \left( \frac{d\mathbf{x}}{d\mathbf{y}^T} + \frac{d\mathbf{x}}{d\bar{\mathbf{y}}^T} \right) \Big|_{\mathbf{y}=\bar{\mathbf{y}}} \in \mathbb{R}^{N_a N_s \times N_a N_c}. \quad (\text{A79})$$

3172 Similarly, let us momentarily write  $\mathbf{x} = \tilde{\mathbf{g}}(\mathbf{x}, \bar{\mathbf{x}})$  for some differenti-  
3173 able function  $\tilde{\mathbf{g}}$  to highlight the dependence of a mutant's states  
3174  $\mathbf{x}$  on her (developmentally earlier) states  $\bar{\mathbf{x}}$  and on the states  $\bar{\mathbf{y}}$   
3175 of resident social partners. Consider the resident states that devel-  
3176 op in the context of mutant states, denoted by  $\check{\mathbf{x}} = \tilde{\mathbf{g}}(\bar{\mathbf{x}}, \mathbf{x})$ .  
3177 Hence,

$$\frac{d\check{\mathbf{x}}}{d\bar{\mathbf{x}}^T} \Big|_{\mathbf{y}=\bar{\mathbf{y}}} = \frac{d\tilde{\mathbf{g}}(\bar{\mathbf{x}}, \mathbf{x})}{d\bar{\mathbf{x}}^T} \Big|_{\mathbf{y}=\bar{\mathbf{y}}} = \frac{d\tilde{\mathbf{g}}(\mathbf{x}, \bar{\mathbf{x}})}{d\bar{\mathbf{x}}^T} \Big|_{\mathbf{y}=\bar{\mathbf{y}}} = \frac{d\mathbf{x}}{d\bar{\mathbf{x}}^T} \Big|_{\mathbf{y}=\bar{\mathbf{y}}}, \quad (\text{A80})$$

3178 where the second equality follows by exchanging dummy vari-  
3179 ables. Then, the transpose of the matrix of *total social effects of a*  
3180 *mutant's states on her and a partner's states is*

$$\frac{d(\mathbf{x} + \check{\mathbf{x}})}{d\bar{\mathbf{x}}^T} \Big|_{\mathbf{y}=\bar{\mathbf{y}}} = \left( \frac{d\mathbf{x}}{d\bar{\mathbf{x}}^T} + \frac{d\check{\mathbf{x}}}{d\bar{\mathbf{x}}^T} \right) \Big|_{\mathbf{y}=\bar{\mathbf{y}}} = \left( \frac{d\mathbf{x}}{d\bar{\mathbf{x}}^T} + \frac{d\mathbf{x}}{d\bar{\mathbf{x}}^T} \right) \Big|_{\mathbf{y}=\bar{\mathbf{y}}} \in \mathbb{R}^{N_a N_s \times N_a N_s}. \quad (\text{A81})$$

3181 Thus, from Eq. (A80) and the second equality of Eq. (68), the  
3182 transpose of the matrix of *stabilized effects of a focal individual's*  
3183 *states on social partners' states may also be written as*

$$\frac{s\mathbf{x}}{s\bar{\mathbf{x}}^T} \Big|_{\mathbf{y}=\bar{\mathbf{y}}} = \left( \mathbf{I} - \frac{d\check{\mathbf{x}}}{d\bar{\mathbf{x}}^T} \Big|_{\mathbf{y}=\bar{\mathbf{y}}} \right)^{-1}$$

$$= \sum_{\theta=1}^{\infty} \left( \frac{d\check{\mathbf{x}}}{d\mathbf{x}^T} \right)^{\theta-1} \Big|_{\mathbf{y}=\bar{\mathbf{y}}} \in \mathbb{R}^{N_a N_s \times N_a N_s},$$

3184 where the last equality follows from the geometric series of  
3185 matrices. This equation is the first and third equalities of (68).

3186 Therefore, using Eqs. (69) and (69b), the evolutionary dynam-  
3187 ics of states are given by

$$\begin{aligned} \frac{d\bar{\mathbf{x}}}{d\tau} &= \left( \frac{\mathbf{s}\mathbf{x}}{\mathbf{s}\bar{\mathbf{x}}^T} \frac{d(\mathbf{x} + \check{\mathbf{x}})}{d\mathbf{y}^T} \frac{d\bar{\mathbf{y}}}{d\tau} + \frac{\mathbf{s}\mathbf{x}}{\mathbf{s}\bar{\mathbf{x}}^T} \frac{d\mathbf{x}}{d\mathbf{e}^T} \frac{\partial \bar{\mathbf{e}}}{\partial \tau} \right) \Big|_{\mathbf{y}=\bar{\mathbf{y}}} \\ &= \left( \frac{\mathbf{s}\mathbf{x}}{\mathbf{s}\bar{\mathbf{y}}^T} \mathbf{G}_y \frac{d\bar{\mathbf{y}}}{d\tau} + \frac{\mathbf{s}\mathbf{x}}{\mathbf{s}\bar{\mathbf{e}}^T} \frac{\partial \bar{\mathbf{e}}}{\partial \tau} \right) \Big|_{\mathbf{y}=\bar{\mathbf{y}}} \\ &= \left( \mathbf{H}_{xy} \frac{d\bar{\mathbf{y}}}{d\tau} + \frac{\mathbf{s}\mathbf{x}}{\mathbf{s}\bar{\mathbf{e}}^T} \frac{\partial \bar{\mathbf{e}}}{\partial \tau} \right) \Big|_{\mathbf{y}=\bar{\mathbf{y}}}, \end{aligned} \quad (\text{A82})$$

3188 where the second equality follows by using Eq. (A68) in the limit  
3189  $\Delta\tau \rightarrow 0$ , and the third equality follows from Eq. (87). The first  
3190 line of Eq. A82 describing evolutionary change of states in terms  
3191 of evolutionary change of controls is a generalization of previous  
3192 equations describing the evolution of a multivariate phenotype  
3193 in terms of allele frequency change (e.g., the first equation on  
3194 p. 49 of Engen and Sæther 2021). Eq. (A82) is Eq. (92) for  $\zeta = \mathbf{x}$ .  
3195 Using the third line of Eq. (64) and Eq. (85) yields Eq. (91) for  
3196  $\zeta = \mathbf{x}$ , whereas using the fourth line of Eq. (64) and Eq. (86)  
3197 yields Eq. (88a) for  $\zeta = \mathbf{x}$ .

## 3198 Appendix 10: evolutionary dynamics of the phenotype

### 3199 In terms of total genetic selection

3200 Here we obtain an equation describing the evolutionary dynam-  
3201 ics of the resident phenotype, that is,  $d\bar{\mathbf{z}}/d\tau$ . In this section, we  
3202 write such an equation in terms of the total genetic selection.  
3203 Since  $d\bar{\mathbf{z}}/d\tau = (d\bar{\mathbf{x}}/d\tau; d\bar{\mathbf{y}}/d\tau)$ , from Eqs. (A82) and (14a), we  
3204 can write the evolutionary dynamics of the resident phenotype  
3205  $\bar{\mathbf{z}}$  as

$$\frac{d\bar{\mathbf{z}}}{d\tau} = \left[ \begin{array}{c} \left( \mathbf{H}_{xy} \right) \frac{d\bar{\mathbf{y}}}{d\tau} + \left( \frac{\mathbf{s}\mathbf{x}}{\mathbf{s}\bar{\mathbf{e}}^T} \right) \frac{\partial \bar{\mathbf{e}}}{\partial \tau} \\ \mathbf{G}_y \end{array} \right] \Big|_{\mathbf{y}=\bar{\mathbf{y}}}. \quad (\text{A83})$$

3206 Using Eqs. (87) and (70), this is

$$\frac{d\bar{\mathbf{z}}}{d\tau} = \left[ \begin{array}{c} \left( \frac{\mathbf{s}\mathbf{x}}{\mathbf{s}\bar{\mathbf{y}}^T} \right) \mathbf{G}_y \frac{d\bar{\mathbf{y}}}{d\tau} + \left( \frac{\mathbf{s}\mathbf{x}}{\mathbf{s}\bar{\mathbf{e}}^T} \right) \frac{\partial \bar{\mathbf{e}}}{\partial \tau} \\ \left( \frac{\mathbf{s}\mathbf{y}}{\mathbf{s}\bar{\mathbf{y}}^T} \right) \end{array} \right] \Big|_{\mathbf{y}=\bar{\mathbf{y}}}.$$

3207 Using Eq. (72), this reduces to

$$\frac{d\bar{\mathbf{z}}}{d\tau} = \left( \frac{\mathbf{s}\mathbf{z}}{\mathbf{s}\bar{\mathbf{y}}^T} \mathbf{G}_y \frac{d\bar{\mathbf{y}}}{d\tau} + \frac{\mathbf{s}\mathbf{z}}{\mathbf{s}\bar{\mathbf{e}}^T} \frac{\partial \bar{\mathbf{e}}}{\partial \tau} \right) \Big|_{\mathbf{y}=\bar{\mathbf{y}}}.$$

3208 Using Eq. (87) yields Eq. (92) for  $\zeta = \mathbf{z}$ . Using the third line of  
3209 Eq. (64) and Eq. (85) yields Eq. (91) for  $\zeta = \mathbf{z}$ , whereas using the  
3210 fourth line of Eq. (64) and (86) yields Eq. (88a) for  $\zeta = \mathbf{z}$ .

3211 In contrast to other arrangements, the premultiplying matrix  
3212  $\mathbf{H}_{zy}$  is non-singular if  $\mathbf{G}_y$  is non-singular. Indeed, if

$$\frac{\mathbf{s}\mathbf{z}}{\mathbf{s}\bar{\mathbf{y}}^T} \Big|_{\mathbf{y}=\bar{\mathbf{y}}} \mathbf{r} = \mathbf{0}$$

for some vector  $\mathbf{r}$ , then from Eqs. (72a) and (70b) we have

$$\left( \begin{array}{c} \mathbf{s}\mathbf{x} \\ \mathbf{s}\bar{\mathbf{y}}^T \\ \mathbf{I} \end{array} \right) \Big|_{\mathbf{y}=\bar{\mathbf{y}}} \mathbf{r} = \mathbf{0}.$$

Doing the multiplication yields

$$\left( \begin{array}{c} \mathbf{s}\mathbf{x} \\ \mathbf{s}\bar{\mathbf{y}}^T \Big|_{\mathbf{y}=\bar{\mathbf{y}}} \mathbf{r} \\ \mathbf{r} \end{array} \right) = \mathbf{0},$$

3215 which implies that  $\mathbf{r} = \mathbf{0}$ , so  $\mathbf{s}\mathbf{z}/\mathbf{s}\bar{\mathbf{y}}^T|_{\mathbf{y}=\bar{\mathbf{y}}}$  is non-singular. Thus,  
3216  $\mathbf{H}_{zy}$  is non-singular if  $\mathbf{G}_y$  is non-singular.

### 3217 In terms of total selection on the phenotype

3218 Here we write the evolutionary dynamics of the phenotype in  
3219 terms of the total selection gradient of the phenotype.

3220 First, using Eq. (77), we define the *additive genetic covariance*  
3221 *matrix of the undeveloped phenotype*  $\hat{\mathbf{z}} = (\bar{\mathbf{x}}; \bar{\mathbf{y}})$  as

$$\begin{aligned} \mathbf{G}_{\hat{\mathbf{z}}} &\equiv \text{cov}[\mathbf{a}_{\hat{\mathbf{z}}}, \mathbf{a}_{\hat{\mathbf{z}}}] = \left( \frac{d\hat{\mathbf{z}}}{d\mathbf{y}^T} \mathbf{G}_y \frac{d\hat{\mathbf{z}}^T}{d\mathbf{y}} \right) \Big|_{\mathbf{y}=\bar{\mathbf{y}}} \\ &\in \mathbb{R}^{N_a(N_s+N_c) \times N_a(N_s+N_c)}. \end{aligned}$$

By definition of  $\hat{\mathbf{z}}$ , we have

$$\mathbf{G}_{\hat{\mathbf{z}}} = \left[ \begin{array}{c} \left( \frac{d\bar{\mathbf{x}}}{d\bar{\mathbf{y}}^T} \right) \mathbf{G}_y \left( \frac{d\bar{\mathbf{x}}^T}{d\bar{\mathbf{y}}} \quad \frac{d\bar{\mathbf{y}}^T}{d\bar{\mathbf{y}}} \right) \\ \left( \frac{d\bar{\mathbf{y}}}{d\bar{\mathbf{y}}^T} \right) \end{array} \right] \Big|_{\mathbf{y}=\bar{\mathbf{y}}}.$$

3222 From Eq. (2), resident states are independent of mutant controls,  
3223 so

$$\mathbf{G}_{\hat{\mathbf{z}}} = \left[ \begin{array}{c} \left( \begin{array}{cc} \mathbf{0} & \\ \mathbf{I} & \end{array} \right) \mathbf{G}_y \left( \begin{array}{cc} \mathbf{0} & \mathbf{I} \end{array} \right) \\ \left( \begin{array}{cc} \mathbf{0} & \mathbf{I} \end{array} \right) \end{array} \right] \Big|_{\mathbf{y}=\bar{\mathbf{y}}}.$$

Doing the matrix multiplication yields

$$\mathbf{G}_{\hat{\mathbf{z}}} = \left[ \begin{array}{c} \left( \begin{array}{cc} \mathbf{0} & \\ \mathbf{I} & \end{array} \right) \left( \begin{array}{cc} \mathbf{0} & \mathbf{G}_y \end{array} \right) \\ \left( \begin{array}{cc} \mathbf{0} & \mathbf{I} \end{array} \right) \end{array} \right] \Big|_{\mathbf{y}=\bar{\mathbf{y}}} = \left( \begin{array}{cc} \mathbf{0} & \mathbf{0} \\ \mathbf{0} & \mathbf{G}_y \end{array} \right). \quad (\text{A84})$$

3224 The matrix  $\mathbf{G}_{\hat{\mathbf{z}}}$  is singular because the undeveloped pheno-  
3225 type includes controls (i.e.,  $d\hat{\mathbf{z}}^T/d\mathbf{y}|_{\mathbf{y}=\bar{\mathbf{y}}}$  has fewer rows than  
3226 columns). For this reason, the matrix  $\mathbf{G}_{\hat{\mathbf{z}}}$  would still be singular  
3227 even if the zero block entries in Eq. (A84) were non-zero (i.e., if  
3228  $d\bar{\mathbf{x}}^T/d\bar{\mathbf{y}}|_{\mathbf{y}=\bar{\mathbf{y}}} \neq \mathbf{0}$ ).

3229 Now, we write an alternative factorization of  $\mathbf{H}_{\hat{\mathbf{z}}}$  in terms of  
3230  $\mathbf{G}_{\hat{\mathbf{z}}}$ . Using Eqs. (55) and (73), consider the matrix

$$\begin{aligned} &\left( \frac{\mathbf{s}\mathbf{z}}{\mathbf{s}\bar{\mathbf{z}}^T} \mathbf{G}_{\hat{\mathbf{z}}} \frac{d\hat{\mathbf{z}}^T}{d\mathbf{z}} \right) \Big|_{\mathbf{y}=\bar{\mathbf{y}}} \\ &= \left[ \begin{array}{c} \left( \frac{\mathbf{s}\mathbf{x}}{\mathbf{s}\bar{\mathbf{x}}^T} \quad \frac{\mathbf{s}\mathbf{x}}{\mathbf{s}\bar{\mathbf{y}}^T} \right) \left( \begin{array}{cc} \mathbf{0} & \mathbf{0} \\ \mathbf{0} & \mathbf{G}_y \end{array} \right) \left( \frac{d\bar{\mathbf{x}}^T}{d\bar{\mathbf{x}}} \quad \mathbf{0} \right) \\ \left( \begin{array}{cc} \mathbf{0} & \mathbf{I} \end{array} \right) \left( \frac{d\bar{\mathbf{x}}^T}{d\bar{\mathbf{y}}} \quad \mathbf{I} \right) \end{array} \right] \Big|_{\mathbf{y}=\bar{\mathbf{y}}}. \end{aligned}$$

Doing the matrix multiplication yields

$$\left( \frac{\mathbf{s}\mathbf{z}}{\mathbf{s}\bar{\mathbf{z}}^T} \mathbf{G}_{\hat{\mathbf{z}}} \frac{d\hat{\mathbf{z}}^T}{d\mathbf{z}} \right) \Big|_{\mathbf{y}=\bar{\mathbf{y}}} = \left[ \begin{array}{c} \left( \frac{\mathbf{s}\mathbf{x}}{\mathbf{s}\bar{\mathbf{x}}^T} \quad \frac{\mathbf{s}\mathbf{x}}{\mathbf{s}\bar{\mathbf{y}}^T} \right) \left( \begin{array}{cc} \mathbf{0} & \mathbf{0} \\ \mathbf{G}_y \frac{d\bar{\mathbf{x}}^T}{d\bar{\mathbf{y}}} & \mathbf{G}_y \end{array} \right) \\ \left( \begin{array}{cc} \mathbf{0} & \mathbf{I} \end{array} \right) \end{array} \right] \Big|_{\mathbf{y}=\bar{\mathbf{y}}}$$

$$= \left( \begin{array}{cc} \frac{\mathbf{s}\mathbf{x}}{\mathbf{s}\mathbf{y}^T} \mathbf{G}_y \frac{d\mathbf{x}^T}{d\mathbf{y}} & \frac{\mathbf{s}\mathbf{x}}{\mathbf{s}\mathbf{y}^T} \mathbf{G}_y \\ \mathbf{G}_y \frac{d\mathbf{x}^T}{d\mathbf{y}} & \mathbf{G}_y \end{array} \right) \Bigg|_{\mathbf{y}=\bar{\mathbf{y}}}.$$

3234 Using Eq. (70b), we have

$$\left( \frac{\mathbf{s}\mathbf{z}}{\mathbf{s}\mathbf{z}^T} \mathbf{G}_z \frac{d\mathbf{z}^T}{d\mathbf{z}} \right) \Bigg|_{\mathbf{y}=\bar{\mathbf{y}}} = \left( \begin{array}{cc} \frac{\mathbf{s}\mathbf{x}}{\mathbf{s}\mathbf{y}^T} \mathbf{G}_y \frac{d\mathbf{x}^T}{d\mathbf{y}} & \frac{\mathbf{s}\mathbf{x}}{\mathbf{s}\mathbf{y}^T} \mathbf{G}_y \frac{d\mathbf{y}^T}{d\mathbf{y}} \\ \frac{\mathbf{s}\mathbf{y}}{\mathbf{s}\mathbf{y}^T} \mathbf{G}_y \frac{d\mathbf{x}^T}{d\mathbf{y}} & \frac{\mathbf{s}\mathbf{y}}{\mathbf{s}\mathbf{y}^T} \mathbf{G}_y \frac{d\mathbf{y}^T}{d\mathbf{y}} \end{array} \right) \Bigg|_{\mathbf{y}=\bar{\mathbf{y}}}.$$

3235 Notice that the matrix on the right-hand side is

$$\left( \frac{\mathbf{s}\mathbf{z}}{\mathbf{s}\mathbf{y}^T} \mathbf{G}_y \frac{d\mathbf{z}^T}{d\mathbf{y}} \right) \Bigg|_{\mathbf{y}=\bar{\mathbf{y}}} = \mathbf{H}_z.$$

3236 Hence, we obtain an alternative factorization for  $\mathbf{H}_z$  as

$$\mathbf{H}_z = \left( \frac{\mathbf{s}\mathbf{z}}{\mathbf{s}\mathbf{z}^T} \mathbf{G}_z \frac{d\mathbf{z}^T}{d\mathbf{z}} \right) \Bigg|_{\mathbf{y}=\bar{\mathbf{y}}}.$$

3237 Thus, we can write the selection response of the phenotype  
3238 (in the form of Eq. 91) as

$$\mathbf{H}_z \frac{\delta w}{\delta \mathbf{z}} \Bigg|_{\mathbf{y}=\bar{\mathbf{y}}} = \left( \frac{\mathbf{s}\mathbf{z}}{\mathbf{s}\mathbf{z}^T} \mathbf{G}_z \frac{d\mathbf{z}^T}{d\mathbf{z}} \frac{\delta w}{\delta \mathbf{z}} \right) \Bigg|_{\mathbf{y}=\bar{\mathbf{y}}}.$$

3239 Using the relationship between the total and semi-total selection  
3240 gradients of the phenotype (second line of Eq. 66), this becomes

$$\mathbf{H}_z \frac{\delta w}{\delta \mathbf{z}} \Bigg|_{\mathbf{y}=\bar{\mathbf{y}}} = \left( \frac{\mathbf{s}\mathbf{z}}{\mathbf{s}\mathbf{z}^T} \mathbf{G}_z \frac{d\mathbf{w}}{d\mathbf{z}} \right) \Bigg|_{\mathbf{y}=\bar{\mathbf{y}}}.$$

3241 We can further simplify this equation by noticing the following.  
3242 Using Eq. (84) and  $\hat{\mathbf{z}} = (\bar{\mathbf{x}}; \mathbf{y})$ , we have that the *additive socio-*  
3243 *genetic cross-covariance matrix of the phenotype and the undeveloped*  
3244 *phenotype* is

$$\mathbf{H}_{z\hat{\mathbf{z}}} = \left( \frac{\mathbf{s}\mathbf{z}}{\mathbf{s}\mathbf{y}^T} \mathbf{G}_y \frac{d\hat{\mathbf{z}}^T}{d\mathbf{y}} \right) \Bigg|_{\mathbf{y}=\bar{\mathbf{y}}} \in \mathbb{R}^{N_a(N_s+N_c) \times N_a(N_s+N_c)}. \quad (\text{A85})$$

3245 Expanding, we have

$$\mathbf{H}_{z\hat{\mathbf{z}}} = \left[ \left( \begin{array}{c} \frac{\mathbf{s}\mathbf{x}}{\mathbf{s}\mathbf{y}^T} \\ \mathbf{s}\mathbf{y} \\ \mathbf{s}\mathbf{y}^T \end{array} \right) \mathbf{G}_y \left( \begin{array}{cc} \frac{d\bar{\mathbf{x}}^T}{d\mathbf{y}} & \frac{d\mathbf{y}^T}{d\mathbf{y}} \end{array} \right) \right] \Bigg|_{\mathbf{y}=\bar{\mathbf{y}}}.$$

3246 Using Eq. (70b) and since resident states do not depend on mu-  
3247 tant controls, then

$$\mathbf{H}_{z\hat{\mathbf{z}}} = \left[ \left( \begin{array}{c} \frac{\mathbf{s}\mathbf{x}}{\mathbf{s}\mathbf{y}^T} \\ \mathbf{0} \\ \mathbf{I} \end{array} \right) \mathbf{G}_y \left( \begin{array}{cc} \mathbf{0} & \mathbf{I} \end{array} \right) \right] \Bigg|_{\mathbf{y}=\bar{\mathbf{y}}}.$$

3248 Doing the matrix multiplication yields

$$\mathbf{H}_{z\hat{\mathbf{z}}} = \left[ \left( \begin{array}{cc} \frac{\mathbf{s}\mathbf{x}}{\mathbf{s}\mathbf{y}^T} & \mathbf{0} \\ \mathbf{0} & \mathbf{G}_y \end{array} \right) \right] \Bigg|_{\mathbf{y}=\bar{\mathbf{y}}} = \left( \begin{array}{cc} \mathbf{0} & \frac{\mathbf{s}\mathbf{x}}{\mathbf{s}\mathbf{y}^T} \mathbf{G}_y \\ \mathbf{0} & \mathbf{G}_y \end{array} \right) \Bigg|_{\mathbf{y}=\bar{\mathbf{y}}}.$$

3249 Notice that the last matrix equals

$$\left( \frac{\mathbf{s}\mathbf{z}}{\mathbf{s}\mathbf{z}^T} \mathbf{G}_z \right) \Bigg|_{\mathbf{y}=\bar{\mathbf{y}}}.$$

3250 We can then write the evolutionary dynamics of the resident  
3251 phenotype  $\bar{\mathbf{z}}$  in terms of the total selection gradient of the pheno-  
3252 type as

$$\frac{d\bar{\mathbf{z}}}{d\tau} = \left( \mathbf{H}_{z\hat{\mathbf{z}}} \frac{d\bar{w}}{d\bar{\mathbf{z}}} + \frac{\mathbf{s}\mathbf{z}}{\mathbf{s}\mathbf{e}^T} \frac{d\bar{\mathbf{e}}}{d\tau} \right) \Bigg|_{\mathbf{y}=\bar{\mathbf{y}}}. \quad (\text{A86})$$

3253 The cross-covariance matrix  $\mathbf{H}_{z\hat{\mathbf{z}}}$  is singular because  $d\hat{\mathbf{z}}^T/d\mathbf{y}|_{\mathbf{y}=\bar{\mathbf{y}}}$   
3254 has fewer rows than columns since the undeveloped phenotype  
3255 includes controls. For this reason,  $\mathbf{H}_{z\hat{\mathbf{z}}}$  would still be singular  
3256 even if the zero block entries in Eq. (A85) were non-zero (i.e., if  
3257  $d\bar{\mathbf{x}}^T/d\mathbf{y}|_{\mathbf{y}=\bar{\mathbf{y}}} \neq \mathbf{0}$ ). Then, evolutionary equilibria of the pheno-  
3258 type do not imply absence of total selection on the phenotype,  
3259 even if exogenous plastic response is absent.

## 3260 Appendix 11: evolutionary dynamics of the environment

### 3261 *In terms of endogenous and exogenous environmental* 3262 *change*

3263 Here we derive an equation describing the evolutionary dynam-  
3264 ics of the environment. Let  $\bar{\mathbf{z}}(\tau)$  be the resident phenotype at  
3265 evolutionary time  $\tau$ , specifically at the point where the socio-  
3266 devo stable resident is at carrying capacity, marked in Fig. 3. The  
3267  $i$ -th environmental variable experienced by a mutant of age  $a$  at  
3268 such evolutionary time  $\tau$  is  $\epsilon_{ia} = h_{ia}(\mathbf{z}_a(\tau), \bar{\mathbf{z}}(\tau), \tau)$ . Then, evo-  
3269 lutionary change in the  $i$ -th environmental variable experienced  
3270 by residents at age  $a$  is

$$\frac{\Delta \bar{\epsilon}_{ia}}{\Delta \tau} = \frac{1}{\Delta \tau} \left[ h_{ia}(\mathbf{z}_a(\tau + \Delta \tau), \bar{\mathbf{z}}(\tau + \Delta \tau), \tau + \Delta \tau) - h_{ia}(\mathbf{z}_a(\tau), \bar{\mathbf{z}}(\tau), \tau) \right] \Bigg|_{\mathbf{y}=\bar{\mathbf{y}}}.$$

3271 Taking the limit as  $\Delta \tau \rightarrow 0$ , this becomes

$$\frac{d\bar{\epsilon}_{ia}}{d\tau} = \frac{dh_{ia}(\mathbf{z}_a(\tau), \bar{\mathbf{z}}(\tau), \tau)}{d\tau} \Bigg|_{\mathbf{y}=\bar{\mathbf{y}}}.$$

3272 Applying the chain rule, we obtain

$$\frac{d\bar{\epsilon}_{ia}}{d\tau} = \left( \sum_{j=1}^{N_s} \frac{\partial h_{ia}}{\partial x_{ja}} \frac{dx_{ja}}{d\tau} + \sum_{j=1}^{N_c} \frac{\partial h_{ia}}{\partial y_{ja}} \frac{dy_{ja}}{d\tau} + \sum_{k=0}^{N_a} \sum_{j=1}^{N_s} \frac{\partial h_{ia}}{\partial \bar{x}_{jk}} \frac{d\bar{x}_{jk}}{d\tau} + \sum_{k=0}^{N_a} \sum_{j=1}^{N_c} \frac{\partial h_{ia}}{\partial \bar{y}_{jk}} \frac{d\bar{y}_{jk}}{d\tau} + \frac{\partial h_{ia}}{\partial \tau} \right) \Bigg|_{\mathbf{y}=\bar{\mathbf{y}}}.$$

3273 Applying matrix calculus notation, this is

$$\frac{d\bar{\epsilon}_{ia}}{d\tau} = \left( \frac{\partial h_{ia}}{\partial \mathbf{x}_a^T} \frac{d\mathbf{x}_a}{d\tau} + \frac{\partial h_{ia}}{\partial \mathbf{y}_a^T} \frac{d\mathbf{y}_a}{d\tau} + \sum_{k=0}^{N_a} \frac{\partial h_{ia}}{\partial \bar{\mathbf{x}}_k^T} \frac{d\bar{\mathbf{x}}_k}{d\tau} + \sum_{k=0}^{N_a} \frac{\partial h_{ia}}{\partial \bar{\mathbf{y}}_k^T} \frac{d\bar{\mathbf{y}}_k}{d\tau} + \frac{\partial h_{ia}}{\partial \tau} \right) \Bigg|_{\mathbf{y}=\bar{\mathbf{y}}}.$$

3274 Applying matrix calculus notation again yields

$$\frac{d\bar{\epsilon}_{ia}}{d\tau} = \left( \frac{\partial h_{ia}}{\partial \mathbf{x}_a^T} \frac{d\mathbf{x}_a}{d\tau} + \frac{\partial h_{ia}}{\partial \mathbf{y}_a^T} \frac{d\mathbf{y}_a}{d\tau} + \frac{\partial h_{ia}}{\partial \bar{\mathbf{x}}^T} \frac{d\bar{\mathbf{x}}}{d\tau} + \frac{\partial h_{ia}}{\partial \bar{\mathbf{y}}^T} \frac{d\bar{\mathbf{y}}}{d\tau} + \frac{\partial h_{ia}}{\partial \tau} \right) \Bigg|_{\mathbf{y}=\bar{\mathbf{y}}}.$$



3275 Rewriting  $h_{ia}$  as  $\epsilon_{ia}$ , we obtain

$$\frac{d\bar{\epsilon}_{ia}}{d\tau} = \left( \frac{\partial \epsilon_{ia}}{\partial \mathbf{x}_a^\top} \frac{d\mathbf{x}_a}{d\tau} + \frac{\partial \epsilon_{ia}}{\partial \mathbf{y}_a^\top} \frac{d\mathbf{y}_a}{d\tau} + \frac{\partial \epsilon_{ia}}{\partial \bar{\mathbf{x}}^\top} \frac{d\bar{\mathbf{x}}}{d\tau} + \frac{\partial \epsilon_{ia}}{\partial \bar{\mathbf{y}}^\top} \frac{d\bar{\mathbf{y}}}{d\tau} + \frac{\partial \epsilon_{ia}}{\partial \tau} \right) \Big|_{\mathbf{y}=\bar{\mathbf{y}}}.$$

3276 Hence, for all environmental variables at age  $a$ , we have

$$\frac{d\bar{\boldsymbol{\epsilon}}_a}{d\tau} = \left( \frac{\partial \boldsymbol{\epsilon}_a}{\partial \mathbf{x}_a^\top} \frac{d\mathbf{x}_a}{d\tau} + \frac{\partial \boldsymbol{\epsilon}_a}{\partial \mathbf{y}_a^\top} \frac{d\mathbf{y}_a}{d\tau} + \frac{\partial \boldsymbol{\epsilon}_a}{\partial \bar{\mathbf{x}}^\top} \frac{d\bar{\mathbf{x}}}{d\tau} + \frac{\partial \boldsymbol{\epsilon}_a}{\partial \bar{\mathbf{y}}^\top} \frac{d\bar{\mathbf{y}}}{d\tau} + \frac{\partial \boldsymbol{\epsilon}_a}{\partial \tau} \right) \Big|_{\mathbf{y}=\bar{\mathbf{y}}}.$$

3277 Note that evaluation of  $d\mathbf{z}_a/d\tau$  and  $\partial \boldsymbol{\epsilon}_a/\partial \tau$  at  $\mathbf{y} = \bar{\mathbf{y}}$  is  $d\bar{\mathbf{z}}_a/d\tau$   
3278 and  $\partial \boldsymbol{\epsilon}_a/\partial \tau$ , respectively. Using Eqs. (33d) and (33d) yields

$$\begin{aligned} \frac{\partial \boldsymbol{\epsilon}_a}{\partial \bar{\mathbf{x}}^\top} \frac{d\bar{\mathbf{x}}}{d\tau} &= \sum_{j=1}^{N_a} \frac{\partial \boldsymbol{\epsilon}_a}{\partial \mathbf{x}_j^\top} \frac{d\bar{\mathbf{x}}_j}{d\tau} = \frac{\partial \boldsymbol{\epsilon}_a}{\partial \mathbf{x}_a^\top} \frac{d\bar{\mathbf{x}}_a}{d\tau} \\ \frac{\partial \boldsymbol{\epsilon}_a}{\partial \bar{\mathbf{y}}^\top} \frac{d\bar{\mathbf{y}}}{d\tau} &= \sum_{j=1}^{N_a} \frac{\partial \boldsymbol{\epsilon}_a}{\partial \mathbf{y}_j^\top} \frac{d\bar{\mathbf{y}}_j}{d\tau} = \frac{\partial \boldsymbol{\epsilon}_a}{\partial \mathbf{y}_a^\top} \frac{d\bar{\mathbf{y}}_a}{d\tau}. \end{aligned}$$

3279 Then, we have

$$\frac{d\bar{\boldsymbol{\epsilon}}_a}{d\tau} = \left( \frac{\partial \boldsymbol{\epsilon}_a}{\partial \bar{\mathbf{x}}^\top} \frac{d\bar{\mathbf{x}}}{d\tau} + \frac{\partial \boldsymbol{\epsilon}_a}{\partial \bar{\mathbf{y}}^\top} \frac{d\bar{\mathbf{y}}}{d\tau} + \frac{\partial \boldsymbol{\epsilon}_a}{\partial \bar{\mathbf{x}}^\top} \frac{d\bar{\mathbf{x}}}{d\tau} + \frac{\partial \boldsymbol{\epsilon}_a}{\partial \bar{\mathbf{y}}^\top} \frac{d\bar{\mathbf{y}}}{d\tau} + \frac{\partial \boldsymbol{\epsilon}_a}{\partial \tau} \right) \Big|_{\mathbf{y}=\bar{\mathbf{y}}}.$$

3280 Now note that  $\partial \boldsymbol{\epsilon}_a/\partial \mathbf{z}^\top = (\partial \boldsymbol{\epsilon}_a/\partial \mathbf{x}^\top, \partial \boldsymbol{\epsilon}_a/\partial \mathbf{y}^\top)$ , so

$$\frac{d\bar{\boldsymbol{\epsilon}}_a}{d\tau} = \left( \frac{\partial \boldsymbol{\epsilon}_a}{\partial \mathbf{z}^\top} \frac{d\bar{\mathbf{z}}}{d\tau} + \frac{\partial \boldsymbol{\epsilon}_a}{\partial \bar{\mathbf{z}}^\top} \frac{d\bar{\mathbf{z}}}{d\tau} + \frac{\partial \boldsymbol{\epsilon}_a}{\partial \tau} \right) \Big|_{\mathbf{y}=\bar{\mathbf{y}}}.$$

3281 Hence, for all environmental variables over all ages, we have

$$\begin{aligned} \frac{d\bar{\boldsymbol{\epsilon}}}{d\tau} &= \left( \frac{\partial \boldsymbol{\epsilon}}{\partial \mathbf{z}^\top} \frac{d\bar{\mathbf{z}}}{d\tau} + \frac{\partial \boldsymbol{\epsilon}}{\partial \bar{\mathbf{z}}^\top} \frac{d\bar{\mathbf{z}}}{d\tau} + \frac{\partial \boldsymbol{\epsilon}}{\partial \tau} \right) \Big|_{\mathbf{y}=\bar{\mathbf{y}}} \\ &= \left[ \left( \frac{\partial \boldsymbol{\epsilon}}{\partial \mathbf{z}^\top} + \frac{\partial \boldsymbol{\epsilon}}{\partial \bar{\mathbf{z}}^\top} \right) \frac{d\bar{\mathbf{z}}}{d\tau} + \frac{\partial \boldsymbol{\epsilon}}{\partial \tau} \right] \Big|_{\mathbf{y}=\bar{\mathbf{y}}}, \end{aligned}$$

3282 where we use Eq. (37) and the block matrix of direct effects of  
3283 social partners' phenotype on a mutant's environment (Eq. 38;  
3284 see also Eq. 36).

3285 Let us momentarily write  $\boldsymbol{\epsilon} = \tilde{\mathbf{h}}(\mathbf{z}, \bar{\mathbf{z}})$  for some differentiable  
3286 function  $\tilde{\mathbf{h}}$  to highlight the dependence of a mutant's environ-  
3287 ment  $\boldsymbol{\epsilon}$  on her phenotype  $\mathbf{z}$  and on the phenotype  $\bar{\mathbf{x}}$  of resident  
3288 social partners. Consider the environment a resident experiences  
3289 when she is in the context of mutants, denoted by  $\check{\boldsymbol{\epsilon}} = \tilde{\mathbf{h}}(\bar{\mathbf{z}}, \mathbf{z})$ .  
3290 Hence,

$$\frac{\partial \check{\boldsymbol{\epsilon}}}{\partial \mathbf{z}^\top} \Big|_{\mathbf{y}=\bar{\mathbf{y}}} = \frac{\partial \tilde{\mathbf{h}}(\bar{\mathbf{z}}, \mathbf{z})}{\partial \mathbf{z}^\top} \Big|_{\mathbf{y}=\bar{\mathbf{y}}} = \frac{\partial \tilde{\mathbf{h}}(\mathbf{z}, \bar{\mathbf{z}})}{\partial \bar{\mathbf{z}}^\top} \Big|_{\mathbf{y}=\bar{\mathbf{y}}} = \frac{\partial \boldsymbol{\epsilon}}{\partial \bar{\mathbf{z}}^\top} \Big|_{\mathbf{y}=\bar{\mathbf{y}}}, \quad (\text{A87})$$

3291 where the second equality follows by exchanging dummy vari-  
3292 ables. Then, the transpose of the matrix of *direct social effects of a*  
3293 *mutant's phenotype on her and a partner's environment* is

$$\begin{aligned} \frac{\partial(\boldsymbol{\epsilon} + \check{\boldsymbol{\epsilon}})}{\partial \mathbf{z}^\top} \Big|_{\mathbf{y}=\bar{\mathbf{y}}} &= \left( \frac{\partial \boldsymbol{\epsilon}}{\partial \mathbf{z}^\top} + \frac{\partial \check{\boldsymbol{\epsilon}}}{\partial \mathbf{z}^\top} \right) \Big|_{\mathbf{y}=\bar{\mathbf{y}}} = \left( \frac{\partial \boldsymbol{\epsilon}}{\partial \mathbf{z}^\top} + \frac{\partial \boldsymbol{\epsilon}}{\partial \bar{\mathbf{z}}^\top} \right) \Big|_{\mathbf{y}=\bar{\mathbf{y}}} \\ &\in \mathbb{R}^{N_a N_e \times N_a(N_s + N_c)}. \end{aligned} \quad (\text{A88})$$

3294 Similarly, the transpose of the matrix of *direct social effects of a*  
3295 *mutant's states on her and a partner's environment* is

$$\frac{\partial(\boldsymbol{\epsilon} + \check{\boldsymbol{\epsilon}})}{\partial \mathbf{x}^\top} \Big|_{\mathbf{y}=\bar{\mathbf{y}}} = \left( \frac{\partial \boldsymbol{\epsilon}}{\partial \mathbf{x}^\top} + \frac{\partial \check{\boldsymbol{\epsilon}}}{\partial \mathbf{x}^\top} \right) \Big|_{\mathbf{y}=\bar{\mathbf{y}}} = \left( \frac{\partial \boldsymbol{\epsilon}}{\partial \mathbf{x}^\top} + \frac{\partial \boldsymbol{\epsilon}}{\partial \bar{\mathbf{x}}^\top} \right) \Big|_{\mathbf{y}=\bar{\mathbf{y}}}$$

$$\in \mathbb{R}^{N_a N_e \times N_a N_s}, \quad (\text{A89})$$

and the transpose of the matrix of *direct social effects of a mutant's*  
3296 *controls on her and a partner's environment* is

$$\begin{aligned} \frac{\partial(\boldsymbol{\epsilon} + \check{\boldsymbol{\epsilon}})}{\partial \mathbf{y}^\top} \Big|_{\mathbf{y}=\bar{\mathbf{y}}} &= \left( \frac{\partial \boldsymbol{\epsilon}}{\partial \mathbf{y}^\top} + \frac{\partial \check{\boldsymbol{\epsilon}}}{\partial \mathbf{y}^\top} \right) \Big|_{\mathbf{y}=\bar{\mathbf{y}}} = \left( \frac{\partial \boldsymbol{\epsilon}}{\partial \mathbf{y}^\top} + \frac{\partial \boldsymbol{\epsilon}}{\partial \bar{\mathbf{y}}^\top} \right) \Big|_{\mathbf{y}=\bar{\mathbf{y}}} \\ &\in \mathbb{R}^{N_a N_e \times N_a N_c}. \end{aligned} \quad (\text{A90})$$

3298 Consequently, the evolutionary dynamics of the environment  
3299 are given by Eq. (97).

### In terms of total genetic selection

3300 Using the expression for the evolutionary dynamics of the phe-  
3301 notype (Eq. 92 for  $\zeta = \mathbf{z}$ ) in that for the environment (Eq. 97)  
3302 yields

$$\frac{d\bar{\boldsymbol{\epsilon}}}{d\tau} = \left[ \frac{\partial(\boldsymbol{\epsilon} + \check{\boldsymbol{\epsilon}})}{\partial \mathbf{z}^\top} \left( \mathbf{H}_{zy} \frac{d\mathbf{w}}{d\mathbf{y}} + \frac{\mathbf{s}\mathbf{z}}{\mathbf{s}\boldsymbol{\epsilon}^\top} \frac{\partial \boldsymbol{\epsilon}}{\partial \tau} \right) + \frac{\partial \boldsymbol{\epsilon}}{\partial \tau} \right] \Big|_{\mathbf{y}=\bar{\mathbf{y}}}.$$

3304 Using Eq. (87) for  $\zeta = \mathbf{z}$  yields

$$\frac{d\bar{\boldsymbol{\epsilon}}}{d\tau} = \left[ \frac{\partial(\boldsymbol{\epsilon} + \check{\boldsymbol{\epsilon}})}{\partial \mathbf{z}^\top} \left( \frac{\mathbf{s}\mathbf{z}}{\mathbf{s}\mathbf{y}^\top} \mathbf{G}_y \frac{d\mathbf{w}}{d\mathbf{y}} + \frac{\mathbf{s}\mathbf{z}}{\mathbf{s}\boldsymbol{\epsilon}^\top} \frac{\partial \boldsymbol{\epsilon}}{\partial \tau} \right) + \frac{\partial \boldsymbol{\epsilon}}{\partial \tau} \right] \Big|_{\mathbf{y}=\bar{\mathbf{y}}}.$$

3305 Collecting for  $\partial \boldsymbol{\epsilon}/\partial \tau$  and using Eq. (71) yields

$$\frac{d\bar{\boldsymbol{\epsilon}}}{d\tau} = \left( \frac{\mathbf{s}\boldsymbol{\epsilon}}{\mathbf{s}\mathbf{y}^\top} \mathbf{G}_y \frac{d\mathbf{w}}{d\mathbf{y}} + \frac{\mathbf{s}\boldsymbol{\epsilon}}{\mathbf{s}\boldsymbol{\epsilon}^\top} \frac{\partial \boldsymbol{\epsilon}}{\partial \tau} \right) \Big|_{\mathbf{y}=\bar{\mathbf{y}}}.$$

3306 Using Eq. (87) yields Eq. (92) for  $\zeta = \boldsymbol{\epsilon}$ . Using the third line of  
3307 Eq. (64) and Eq. (85) yields Eq. (91) for  $\zeta = \boldsymbol{\epsilon}$ , whereas using the  
3308 fourth line of Eq. (64) and Eq. (86) yields Eq. (88a) for  $\zeta = \boldsymbol{\epsilon}$ .

## Appendix 12: evolutionary dynamics of the metaphenotype

### In terms of total genetic selection

3312 Here we obtain an equation describing the evolutionary dynam-  
3313 ics of the resident metaphenotype, that is,  $d\bar{\mathbf{m}}/d\tau$ . In this sec-  
3314 tion, we write such an equation in terms of total genetic selection.  
3315 Since  $d\bar{\mathbf{m}}/d\tau = (d\bar{\mathbf{x}}/d\tau; d\bar{\mathbf{y}}/d\tau; d\bar{\boldsymbol{\epsilon}}/d\tau)$ , from Eqs. (A82), (14a),  
3316 and (92) for  $\zeta = \boldsymbol{\epsilon}$ , we can write the evolutionary dynamics of  
3317 the resident metaphenotype  $\bar{\mathbf{m}}$  as

$$\frac{d\bar{\mathbf{m}}}{d\tau} = \left[ \begin{array}{c} \left( \mathbf{H}_{xy} \right) \\ \mathbf{G}_y \\ \left( \mathbf{H}_{ey} \right) \end{array} \frac{d\mathbf{w}}{d\mathbf{y}} + \begin{array}{c} \left( \frac{\mathbf{s}\mathbf{x}}{\mathbf{s}\boldsymbol{\epsilon}^\top} \\ \mathbf{0} \\ \mathbf{s}\boldsymbol{\epsilon} \right) \end{array} \frac{\partial \boldsymbol{\epsilon}}{\partial \tau} \right] \Big|_{\mathbf{y}=\bar{\mathbf{y}}}. \quad (\text{A91})$$

3318 Using Eqs. (84) and (70), this is

$$\frac{d\bar{\mathbf{m}}}{d\tau} = \left[ \begin{array}{c} \left( \frac{\mathbf{s}\mathbf{x}}{\mathbf{s}\mathbf{y}^\top} \right) \\ \left( \frac{\mathbf{s}\mathbf{y}}{\mathbf{s}\mathbf{y}^\top} \right) \\ \left( \frac{\mathbf{s}\boldsymbol{\epsilon}}{\mathbf{s}\mathbf{y}^\top} \right) \end{array} \right] \mathbf{G}_y \frac{d\mathbf{w}}{d\mathbf{y}} + \left[ \begin{array}{c} \left( \frac{\mathbf{s}\mathbf{x}}{\mathbf{s}\boldsymbol{\epsilon}^\top} \right) \\ \left( \frac{\mathbf{s}\mathbf{y}}{\mathbf{s}\boldsymbol{\epsilon}^\top} \right) \\ \left( \frac{\mathbf{s}\boldsymbol{\epsilon}}{\mathbf{s}\boldsymbol{\epsilon}^\top} \right) \end{array} \right] \frac{\partial \boldsymbol{\epsilon}}{\partial \tau} \Big|_{\mathbf{y}=\bar{\mathbf{y}}}.$$

3319 Using Eq. (74), this reduces to

$$\frac{d\bar{\mathbf{m}}}{d\tau} = \left( \frac{\mathbf{s}\mathbf{m}}{\mathbf{s}\mathbf{y}^\top} \mathbf{G}_y \frac{d\mathbf{w}}{d\mathbf{y}} + \frac{\mathbf{s}\mathbf{m}}{\mathbf{s}\boldsymbol{\epsilon}^\top} \frac{\partial \boldsymbol{\epsilon}}{\partial \tau} \right) \Big|_{\mathbf{y}=\bar{\mathbf{y}}}.$$

3320 Using Eq. (87) yields Eq. (92) for  $\zeta = \mathbf{m}$ . Using the third line of  
 3321 Eq. (64) and Eq. (85) yields Eq. (91) for  $\zeta = \mathbf{m}$ , whereas using  
 3322 the fourth line of Eq. (64) and Eq. (86) yields Eq. (88a) for  $\zeta = \mathbf{m}$ .

3323 In contrast to other arrangements, the premultiplying matrix  
 3324  $\mathbf{H}_{\mathbf{m}\mathbf{y}}$  is non-singular if  $\mathbf{G}_{\mathbf{y}}$  is non-singular. Indeed, if

$$\left. \begin{array}{c} \mathbf{sm} \\ \mathbf{sy}^T \end{array} \right|_{\mathbf{y}=\bar{\mathbf{y}}} \mathbf{r} = \mathbf{0}$$

3325 for some vector  $\mathbf{r}$ , then from Eqs. (74a) and (70b) we have

$$\left. \begin{array}{c} \left( \begin{array}{c} \mathbf{sx} \\ \mathbf{sy}^T \\ \mathbf{I} \\ \mathbf{se} \\ \mathbf{sy}^T \end{array} \right) \\ \mathbf{r} \end{array} \right|_{\mathbf{y}=\bar{\mathbf{y}}} = \mathbf{0}.$$

3326 Doing the multiplication yields

$$\left. \begin{array}{c} \left( \begin{array}{c} \mathbf{sx} \\ \mathbf{sy}^T \\ \mathbf{r} \\ \mathbf{se} \\ \mathbf{sy}^T \end{array} \right) \\ \mathbf{r} \end{array} \right|_{\mathbf{y}=\bar{\mathbf{y}}} = \mathbf{0},$$

3327 which implies that  $\mathbf{r} = \mathbf{0}$ , so  $\mathbf{sm}/\mathbf{sy}^T|_{\mathbf{y}=\bar{\mathbf{y}}}$  is non-singular. Thus,  
 3328  $\mathbf{H}_{\mathbf{m}\mathbf{y}}$  is non-singular if  $\mathbf{G}_{\mathbf{y}}$  is non-singular.

### 3329 **In terms of total selection on the metaphenotype**

3330 Here we write the evolutionary dynamics of the metaphenotype  
 3331 in terms of the total selection gradient of the metaphenotype.

3332 First, using Eq. (77), we define the *additive genetic covariance*  
 3333 *matrix of the undeveloped metaphenotype*  $\hat{\mathbf{m}} = (\bar{\mathbf{x}}; \mathbf{y}; \bar{\mathbf{e}})$  as

$$\mathbf{G}_{\hat{\mathbf{m}}} \equiv \text{cov}[\mathbf{a}_{\hat{\mathbf{m}}}, \mathbf{a}_{\hat{\mathbf{m}}}] = \left. \left( \begin{array}{c} \mathbf{d}\hat{\mathbf{m}} \\ \mathbf{d}\mathbf{y}^T \mathbf{G}_{\mathbf{y}} \mathbf{d}\hat{\mathbf{m}}^T \\ \mathbf{d}\mathbf{y} \end{array} \right) \right|_{\mathbf{y}=\bar{\mathbf{y}}} \\ \in \mathbb{R}^{N_{\mathbf{a}}(N_{\mathbf{s}}+N_{\mathbf{c}}+N_{\mathbf{e}}) \times N_{\mathbf{a}}(N_{\mathbf{s}}+N_{\mathbf{c}}+N_{\mathbf{e}})}.$$

3334 By definition of  $\hat{\mathbf{m}}$ , we have

$$\mathbf{G}_{\hat{\mathbf{m}}} = \left. \left[ \begin{array}{c} \left( \begin{array}{c} \mathbf{d}\bar{\mathbf{x}} \\ \mathbf{d}\mathbf{y}^T \end{array} \right) \\ \mathbf{G}_{\mathbf{y}} \left( \begin{array}{ccc} \mathbf{d}\bar{\mathbf{x}}^T & \mathbf{d}\mathbf{y}^T & \mathbf{d}\bar{\mathbf{e}}^T \\ \mathbf{d}\mathbf{y} & \mathbf{d}\mathbf{y} & \mathbf{d}\mathbf{y} \end{array} \right) \\ \mathbf{d}\bar{\mathbf{e}} \\ \mathbf{d}\mathbf{y}^T \end{array} \right] \right|_{\mathbf{y}=\bar{\mathbf{y}}}.$$

3335 From Eqs. (2) and (1), resident states and environment are inde-  
 3336 pendent of mutant controls, so

$$\mathbf{G}_{\hat{\mathbf{m}}} = \left. \left[ \begin{array}{c} \left( \begin{array}{c} \mathbf{0} \\ \mathbf{I} \\ \mathbf{0} \end{array} \right) \mathbf{G}_{\mathbf{y}} \left( \begin{array}{ccc} \mathbf{0} & \mathbf{I} & \mathbf{0} \end{array} \right) \right] \right|_{\mathbf{y}=\bar{\mathbf{y}}}.$$

3337 Doing the matrix multiplication yields

$$\mathbf{G}_{\hat{\mathbf{m}}} = \left. \left[ \begin{array}{c} \left( \begin{array}{c} \mathbf{0} \\ \mathbf{I} \\ \mathbf{0} \end{array} \right) \left( \begin{array}{ccc} \mathbf{0} & \mathbf{G}_{\mathbf{y}} & \mathbf{0} \end{array} \right) \right] \right|_{\mathbf{y}=\bar{\mathbf{y}}} = \begin{pmatrix} \mathbf{0} & \mathbf{0} & \mathbf{0} \\ \mathbf{0} & \mathbf{G}_{\mathbf{y}} & \mathbf{0} \\ \mathbf{0} & \mathbf{0} & \mathbf{0} \end{pmatrix}. \quad (\text{A92})$$

The matrix  $\mathbf{G}_{\hat{\mathbf{m}}}$  is singular because the undeveloped metaphe-  
 3338 nototype includes controls (i.e.,  $\mathbf{d}\hat{\mathbf{m}}^T/\mathbf{d}\mathbf{y}|_{\mathbf{y}=\bar{\mathbf{y}}}$  has fewer rows than  
 3339 columns). For this reason, the matrix  $\mathbf{G}_{\hat{\mathbf{m}}}$  would still be singular  
 3340 even if the zero block entries in Eq. (A92) were non-zero (i.e., if  
 3341  $\mathbf{d}\bar{\mathbf{x}}^T/\mathbf{d}\mathbf{y}|_{\mathbf{y}=\bar{\mathbf{y}}} \neq \mathbf{0}$  and  $\mathbf{d}\bar{\mathbf{e}}^T/\mathbf{d}\mathbf{y}|_{\mathbf{y}=\bar{\mathbf{y}}} \neq \mathbf{0}$ ).

Now, we write an alternative factorization of  $\mathbf{H}_{\mathbf{m}}$  in terms of  
 3343  $\mathbf{G}_{\hat{\mathbf{m}}}$ . Using Eqs. (60) and (75), we have  
 3344

$$\left. \left( \begin{array}{c} \mathbf{sm} \\ \mathbf{sm}^T \mathbf{G}_{\hat{\mathbf{m}}} \mathbf{d}\hat{\mathbf{m}}^T \\ \mathbf{d}\hat{\mathbf{m}} \end{array} \right) \right|_{\mathbf{y}=\bar{\mathbf{y}}} = \left. \left[ \begin{array}{ccc} \left( \begin{array}{ccc} \mathbf{sx} & \mathbf{sx} & \mathbf{sx} \\ \mathbf{sx}^T & \mathbf{sy}^T & \mathbf{se}^T \end{array} \right) \begin{pmatrix} \mathbf{0} & \mathbf{0} & \mathbf{0} \\ \mathbf{0} & \mathbf{G}_{\mathbf{y}} & \mathbf{0} \\ \mathbf{0} & \mathbf{0} & \mathbf{0} \end{pmatrix} \\ \left( \begin{array}{ccc} \mathbf{se} & \mathbf{se} & \mathbf{se} \\ \mathbf{sx}^T & \mathbf{sy}^T & \mathbf{se}^T \end{array} \right) \begin{pmatrix} \mathbf{0} & \mathbf{0} & \mathbf{0} \\ \mathbf{0} & \mathbf{0} & \mathbf{0} \\ \mathbf{0} & \mathbf{0} & \mathbf{0} \end{pmatrix} \\ \left( \begin{array}{ccc} \mathbf{d}\mathbf{x}^T & \mathbf{0} & \mathbf{d}\mathbf{e}^T \\ \mathbf{d}\mathbf{x} & \mathbf{0} & \mathbf{d}\mathbf{x} \\ \mathbf{d}\mathbf{x}^T & \mathbf{I} & \mathbf{d}\mathbf{e}^T \\ \mathbf{d}\mathbf{y} & \mathbf{I} & \mathbf{d}\mathbf{e}^T \\ \mathbf{d}\mathbf{x}^T & \mathbf{0} & \mathbf{d}\mathbf{e}^T \\ \mathbf{d}\mathbf{e} & \mathbf{0} & \mathbf{d}\mathbf{e} \end{array} \right) \right] \right|_{\mathbf{y}=\bar{\mathbf{y}}}.$$

Doing the matrix multiplication yields

$$\left. \left( \begin{array}{c} \mathbf{sm} \\ \mathbf{sm}^T \mathbf{G}_{\hat{\mathbf{m}}} \mathbf{d}\hat{\mathbf{m}}^T \\ \mathbf{d}\hat{\mathbf{m}} \end{array} \right) \right|_{\mathbf{y}=\bar{\mathbf{y}}} \\ = \left. \left[ \begin{array}{ccc} \left( \begin{array}{ccc} \mathbf{sx} & \mathbf{sx} & \mathbf{sx} \\ \mathbf{sx}^T & \mathbf{sy}^T & \mathbf{se}^T \end{array} \right) \begin{pmatrix} \mathbf{0} & \mathbf{0} & \mathbf{0} \\ \mathbf{0} & \mathbf{0} & \mathbf{0} \\ \mathbf{0} & \mathbf{0} & \mathbf{0} \end{pmatrix} \\ \left( \begin{array}{ccc} \mathbf{se} & \mathbf{se} & \mathbf{se} \\ \mathbf{sx}^T & \mathbf{sy}^T & \mathbf{se}^T \end{array} \right) \begin{pmatrix} \mathbf{0} & \mathbf{0} & \mathbf{0} \\ \mathbf{0} & \mathbf{0} & \mathbf{0} \\ \mathbf{0} & \mathbf{0} & \mathbf{0} \end{pmatrix} \\ \left( \begin{array}{ccc} \mathbf{sx} & \mathbf{d}\mathbf{x}^T & \mathbf{sx} \\ \mathbf{sy}^T & \mathbf{G}_{\mathbf{y}} \mathbf{d}\mathbf{y} & \mathbf{sy}^T \mathbf{G}_{\mathbf{y}} \\ \mathbf{sy}^T & \mathbf{G}_{\mathbf{y}} \mathbf{d}\mathbf{y} & \mathbf{sy}^T \mathbf{G}_{\mathbf{y}} \mathbf{d}\mathbf{y} \end{array} \right) \begin{pmatrix} \mathbf{0} & \mathbf{0} & \mathbf{0} \\ \mathbf{0} & \mathbf{0} & \mathbf{0} \\ \mathbf{0} & \mathbf{0} & \mathbf{0} \end{pmatrix} \\ \left( \begin{array}{ccc} \mathbf{sx} & \mathbf{d}\mathbf{x}^T & \mathbf{sx} \\ \mathbf{sy}^T & \mathbf{G}_{\mathbf{y}} \mathbf{d}\mathbf{y} & \mathbf{sy}^T \mathbf{G}_{\mathbf{y}} \\ \mathbf{sy}^T & \mathbf{G}_{\mathbf{y}} \mathbf{d}\mathbf{y} & \mathbf{sy}^T \mathbf{G}_{\mathbf{y}} \mathbf{d}\mathbf{y} \end{array} \right) \begin{pmatrix} \mathbf{0} & \mathbf{0} & \mathbf{0} \\ \mathbf{0} & \mathbf{0} & \mathbf{0} \\ \mathbf{0} & \mathbf{0} & \mathbf{0} \end{pmatrix} \\ \left( \begin{array}{ccc} \mathbf{se} & \mathbf{d}\mathbf{e}^T & \mathbf{se} \\ \mathbf{sx}^T & \mathbf{G}_{\mathbf{y}} \mathbf{d}\mathbf{y} & \mathbf{sx}^T \mathbf{G}_{\mathbf{y}} \\ \mathbf{sx}^T & \mathbf{G}_{\mathbf{y}} \mathbf{d}\mathbf{y} & \mathbf{sx}^T \mathbf{G}_{\mathbf{y}} \mathbf{d}\mathbf{y} \end{array} \right) \begin{pmatrix} \mathbf{0} & \mathbf{0} & \mathbf{0} \\ \mathbf{0} & \mathbf{0} & \mathbf{0} \\ \mathbf{0} & \mathbf{0} & \mathbf{0} \end{pmatrix} \end{array} \right] \right|_{\mathbf{y}=\bar{\mathbf{y}}}$$

Using Eq. (70b), we have

$$\left. \left( \begin{array}{c} \mathbf{sm} \\ \mathbf{sm}^T \mathbf{G}_{\hat{\mathbf{m}}} \mathbf{d}\hat{\mathbf{m}}^T \\ \mathbf{d}\hat{\mathbf{m}} \end{array} \right) \right|_{\mathbf{y}=\bar{\mathbf{y}}} \\ = \left. \left[ \begin{array}{ccc} \left( \begin{array}{ccc} \mathbf{sx} & \mathbf{d}\mathbf{x}^T & \mathbf{sx} \\ \mathbf{sy}^T & \mathbf{G}_{\mathbf{y}} \mathbf{d}\mathbf{y} & \mathbf{sy}^T \mathbf{G}_{\mathbf{y}} \\ \mathbf{sy}^T & \mathbf{G}_{\mathbf{y}} \mathbf{d}\mathbf{y} & \mathbf{sy}^T \mathbf{G}_{\mathbf{y}} \mathbf{d}\mathbf{y} \end{array} \right) \begin{pmatrix} \mathbf{0} & \mathbf{0} & \mathbf{0} \\ \mathbf{0} & \mathbf{0} & \mathbf{0} \\ \mathbf{0} & \mathbf{0} & \mathbf{0} \end{pmatrix} \\ \left( \begin{array}{ccc} \mathbf{se} & \mathbf{d}\mathbf{e}^T & \mathbf{se} \\ \mathbf{sx}^T & \mathbf{G}_{\mathbf{y}} \mathbf{d}\mathbf{y} & \mathbf{sx}^T \mathbf{G}_{\mathbf{y}} \\ \mathbf{sx}^T & \mathbf{G}_{\mathbf{y}} \mathbf{d}\mathbf{y} & \mathbf{sx}^T \mathbf{G}_{\mathbf{y}} \mathbf{d}\mathbf{y} \end{array} \right) \begin{pmatrix} \mathbf{0} & \mathbf{0} & \mathbf{0} \\ \mathbf{0} & \mathbf{0} & \mathbf{0} \\ \mathbf{0} & \mathbf{0} & \mathbf{0} \end{pmatrix} \end{array} \right] \right|_{\mathbf{y}=\bar{\mathbf{y}}}$$

Notice that the matrix on the right-hand side is

$$\left. \left( \begin{array}{c} \mathbf{sm} \\ \mathbf{sy}^T \mathbf{G}_{\mathbf{y}} \mathbf{d}\mathbf{y} \\ \mathbf{d}\mathbf{y} \end{array} \right) \right|_{\mathbf{y}=\bar{\mathbf{y}}} = \mathbf{H}_{\mathbf{m}}.$$

Hence, we obtain an alternative factorization for  $\mathbf{H}_{\mathbf{m}}$  as

$$\mathbf{H}_{\mathbf{m}} = \left. \left( \begin{array}{c} \mathbf{sm} \\ \mathbf{sm}^T \mathbf{G}_{\hat{\mathbf{m}}} \mathbf{d}\hat{\mathbf{m}}^T \\ \mathbf{d}\hat{\mathbf{m}} \end{array} \right) \right|_{\mathbf{y}=\bar{\mathbf{y}}}.$$

3349 We can now write the selection response of the metapheno-  
3350 type (in the form of Eq. 88a) as

$$\mathbf{H}_m \frac{\partial w}{\partial \mathbf{m}} \Big|_{y=\bar{y}} = \left( \frac{\mathbf{sm}}{\mathbf{sm}^T} \mathbf{G}_m \frac{d\mathbf{m}^T}{d\mathbf{m}} \frac{\partial w}{\partial \mathbf{m}} \right) \Big|_{y=\bar{y}}.$$

3351 Using the relationship between the total and partial selection  
3352 gradients of the metaphenotype (Eq. 67), this becomes

$$\mathbf{H}_m \frac{\partial w}{\partial \mathbf{m}} \Big|_{y=\bar{y}} = \left( \frac{\mathbf{sm}}{\mathbf{sm}^T} \mathbf{G}_m \frac{dw}{d\mathbf{m}} \right) \Big|_{y=\bar{y}}.$$

3353 We can further simplify this equation by noticing the follow-  
3354 ing. Using Eq. (84) and  $\hat{\mathbf{m}} = (\bar{\mathbf{x}}; \mathbf{y}; \bar{\boldsymbol{\epsilon}})$ , we have that the *additive*  
3355 *socio-genetic cross-covariance matrix of the metaphenotype and the*  
3356 *undeveloped metaphenotype* is

$$\mathbf{H}_{m\hat{m}} = \left( \frac{\mathbf{sm}}{\mathbf{sy}^T} \mathbf{G}_y \frac{d\hat{\mathbf{m}}^T}{d\mathbf{y}} \right) \Big|_{y=\bar{y}} \quad (\text{A93})$$

$$\in \mathbb{R}^{N_a(N_s+N_c+N_e) \times N_a(N_s+N_c+N_e)}.$$

3357 Expanding, we have

$$\mathbf{H}_{m\hat{m}} = \left[ \begin{array}{c} \left( \frac{\mathbf{sx}}{\mathbf{sy}^T} \right) \\ \mathbf{sy} \\ \frac{\mathbf{sy}}{\mathbf{sy}^T} \\ \mathbf{s\boldsymbol{\epsilon}} \\ \frac{\mathbf{s\boldsymbol{\epsilon}}}{\mathbf{sy}^T} \end{array} \right] \mathbf{G}_y \left( \begin{array}{ccc} \frac{d\bar{\mathbf{x}}^T}{d\mathbf{y}} & \frac{d\mathbf{y}^T}{d\mathbf{y}} & \frac{d\bar{\boldsymbol{\epsilon}}^T}{d\mathbf{y}} \end{array} \right) \Big|_{y=\bar{y}}.$$

3358 Using Eq. (70b) and since resident states and environment do  
3359 not depend on mutant controls, then

$$\mathbf{H}_{m\hat{m}} = \left[ \begin{array}{c} \left( \frac{\mathbf{sx}}{\mathbf{sy}^T} \right) \\ \mathbf{I} \\ \mathbf{s\boldsymbol{\epsilon}} \\ \frac{\mathbf{s\boldsymbol{\epsilon}}}{\mathbf{sy}^T} \end{array} \right] \mathbf{G}_y \left( \begin{array}{ccc} \mathbf{0} & \mathbf{I} & \mathbf{0} \end{array} \right) \Big|_{y=\bar{y}}.$$

3360 Doing the matrix multiplication yields

$$\mathbf{H}_{m\hat{m}} = \left[ \begin{array}{ccc} \left( \frac{\mathbf{sx}}{\mathbf{sy}^T} \right) & \mathbf{0} & \mathbf{0} \\ \mathbf{I} & \mathbf{G}_y & \mathbf{0} \\ \mathbf{s\boldsymbol{\epsilon}} & \mathbf{0} & \mathbf{0} \\ \frac{\mathbf{s\boldsymbol{\epsilon}}}{\mathbf{sy}^T} & \mathbf{0} & \mathbf{0} \end{array} \right] \Big|_{y=\bar{y}}$$

$$= \left( \begin{array}{ccc} \mathbf{0} & \frac{\mathbf{sx}}{\mathbf{sy}^T} \mathbf{G}_y & \mathbf{0} \\ \mathbf{0} & \mathbf{G}_y & \mathbf{0} \\ \mathbf{0} & \frac{\mathbf{s\boldsymbol{\epsilon}}}{\mathbf{sy}^T} \mathbf{G}_y & \mathbf{0} \end{array} \right) \Big|_{y=\bar{y}}.$$

3361 Notice that the last matrix equals

$$\left( \frac{\mathbf{sm}}{\mathbf{sm}^T} \mathbf{G}_m \right) \Big|_{y=\bar{y}}.$$

3362 Thus,

$$\mathbf{H}_{m\hat{m}} = \left( \frac{\mathbf{sm}}{\mathbf{sm}^T} \mathbf{G}_m \right) \Big|_{y=\bar{y}}.$$

We can then write the evolutionary dynamics of the resident  
metaphenotype  $\hat{\mathbf{m}}$  in terms of the total selection gradient of the  
metaphenotype as

$$\frac{d\hat{\mathbf{m}}}{d\tau} = \left( \mathbf{H}_{m\hat{m}} \frac{dw}{d\mathbf{m}} + \frac{\mathbf{sm}}{\mathbf{s\boldsymbol{\epsilon}^T} \partial \tau} \right) \Big|_{y=\bar{y}}. \quad (\text{A94})$$

The cross-covariance matrix  $\mathbf{H}_{m\hat{m}}$  is singular because  
 $d\hat{\mathbf{m}}^T/d\mathbf{y}|_{y=\bar{y}}$  has fewer rows than columns since the undevel-  
oped metaphenotype includes controls. For this reason,  $\mathbf{H}_{m\hat{m}}$   
would still be singular even if the zero block entries in Eq. (A93)  
were non-zero (i.e., if  $d\bar{\mathbf{x}}^T/d\mathbf{y}|_{y=\bar{y}} \neq \mathbf{0}$  and  $d\bar{\boldsymbol{\epsilon}}^T/d\mathbf{y}|_{y=\bar{y}} \neq \mathbf{0}$ ).  
Then, evolutionary equilibria of the metaphenotype do not  
imply absence of total selection on the metaphenotype, even if  
exogenous plastic response is absent.

### Appendix 13: connection to dynamic optimization

Life-history models often consider traits that depend on an un-  
derlying variable (e.g., age) together with developmental (or  
dynamic) constraints. When such a model is simple enough,  
analytical solution (i.e., identification of evolutionarily stable  
strategies) is possible using optimal control or dynamic program-  
ming methods (Sydsæter *et al.* 2008). A key tool from optimal  
control theory that enables finding such analytical solutions  
(i.e., optimal controls) is Pontryagin's maximum principle. The  
maximum principle is a theorem that essentially transforms the  
dynamic optimization problem into a simpler problem of max-  
imizing a function called the Hamiltonian, which depends on  
control, state, and costate (or adjoint) variables. The problem is  
then to maximize the Hamiltonian with respect to the controls,  
while state and costate variables can be found from associated  
dynamic equations. We now show that our results recover the  
maximization of the Hamiltonian.

First, we identify what the costate variables are and show  
that they are proportional to the total selection gradient of states,  
for which we have obtained general formulas, provided that the  
problem is a standard life-history model of  $R_0$  maximization. Let  
us write  $R_0(\mathbf{z}, \bar{\mathbf{z}})$  for the expected lifetime number of offspring of  
a mutant with phenotype  $\mathbf{z} = (\mathbf{x}; \mathbf{y})$  in the context of a resident  
with phenotype  $\bar{\mathbf{z}} = (\bar{\mathbf{x}}; \bar{\mathbf{y}})$ . Let  $\mathbf{z}^* = (\mathbf{x}^*; \mathbf{y}^*)$  be such that

$$\mathbf{y}^* \in \arg \max_{\mathbf{y}} R_0(\mathbf{z}, \mathbf{z}^*),$$

subject to the dynamic constraint (8)

$$\mathbf{x}_{a+1} = \mathbf{g}_a(\mathbf{z}_a, \bar{\mathbf{z}}, \mathbf{h}_a(\mathbf{z}_a, \bar{\mathbf{z}}, \tau)).$$

Such  $\mathbf{z}^*$  is a best response to itself under the best response func-  
tion  $R_0$ , where  $\mathbf{y}^*$  is an optimal control and  $\mathbf{x}^*$  is its associated  
optimal state. From Eq. (92) for  $\zeta = \mathbf{z}$  and Eq. (29b), it follows  
that if there is no exogenous environmental change, then such  $\mathbf{z}^*$   
is an admissible locally stable evolutionary equilibrium. More-  
over, the costate for the  $i$ -th state variable at age  $a$  is defined as

$$k_{x_{ia}} \equiv \frac{dR_0}{dx_{ia}} \Big|_{\mathbf{z}=\mathbf{z}^*} \quad (\text{A95})$$

(section 9.6 of Sydsæter *et al.* 2008). Hence, from Eq. (29b), we  
have that the costate for the  $i$ -th state variable at age  $a$  is

$$k_{x_{ia}} = T \frac{dw}{dx_{ia}} \Big|_{\mathbf{z}=\mathbf{z}^*}. \quad (\text{A96})$$

3408 That is, costate variables are proportional to the total selection  
 3409 gradient of state variables at an admissible evolutionary equilib-  
 3410 rium  $\mathbf{z}^*$ . The total selection gradient of states thus generalizes  
 3411 the costate notion to outside of evolutionary equilibrium for  
 3412 the life-history problem of  $R_0$  maximization. The fifth line of  
 3413 Eq. (64) shows how such generalized costates affect the evolu-  
 3414 tionary process, namely, indirectly by being transformed by the  
 3415 semi-total effects of controls on states,  $\delta\mathbf{x}^\top/\delta\mathbf{y}$ . Additionally,  
 3416 we have obtained various equations (63) that enable calculation  
 3417 of such generalized costates in age structured models with  $R_0$   
 3418 maximization.

3419 Second, we show that the total selection gradient of controls is  
 3420 proportional to the semi-total effects of controls on the Hamilto-  
 3421 nian when both are evaluated at optimal controls. We have that  
 3422 the total selection gradient of controls can be written in terms of  
 3423 the total selection gradients of states (fifth line of Eq. 64), so for  
 3424 the controls at age  $a$  we have

$$\frac{dw}{d\mathbf{y}_a} \Big|_{\mathbf{y}=\bar{\mathbf{y}}} = \left( \frac{\delta\mathbf{x}^\top}{\delta\mathbf{y}_a} \frac{dw}{d\mathbf{x}} + \frac{\delta w}{\delta\mathbf{y}_a} \right) \Big|_{\mathbf{y}=\bar{\mathbf{y}}}.$$

3425 Using Eq. (29) yields

$$\frac{dw}{d\mathbf{y}_a} \Big|_{\mathbf{y}=\bar{\mathbf{y}}} = \frac{1}{T} \left( \frac{\delta\mathbf{x}^\top}{\delta\mathbf{y}_a} \frac{dR_0}{d\mathbf{x}} + \frac{\delta R_0}{\delta\mathbf{y}_a} \right) \Big|_{\mathbf{y}=\bar{\mathbf{y}}}.$$

3426 From Eqs. (A48) and (28) given that the semi-total derivative  
 3427 only considers the environmental constraint (9) but ignores the  
 3428 developmental constraint (8), it follows that

$$\frac{dw}{d\mathbf{y}_a} \Big|_{\mathbf{y}=\bar{\mathbf{y}}} = \frac{1}{T} \left( \frac{\delta\mathbf{x}_{a+1}^\top}{\delta\mathbf{y}_a} \frac{dR_0}{d\mathbf{x}_{a+1}} + \frac{\delta(\ell_a f_a)}{\delta\mathbf{y}_a} \right) \Big|_{\mathbf{y}=\bar{\mathbf{y}}}.$$

3429 Using Eqs. (A95) and (8) yields

$$\frac{dw}{d\mathbf{y}_a} \Big|_{\mathbf{y}=\bar{\mathbf{y}}=\mathbf{y}^*} = \frac{1}{T} \left( \frac{\delta\mathbf{g}_a^\top}{\delta\mathbf{y}_a} \mathbf{k}_{\mathbf{x}_{a+1}} + \frac{\delta(\ell_a f_a)}{\delta\mathbf{y}_a} \right) \Big|_{\mathbf{y}=\bar{\mathbf{y}}=\mathbf{y}^*} = \mathbf{0}.$$

3430 This suggests to define

$$H_a \equiv \mathbf{g}_a^\top \mathbf{k}_{\mathbf{x}_{a+1}} + \ell_a f_a,$$

3431 which recovers the Hamiltonian of Pontryagin's maximum prin-  
 3432 ciple in discrete time (section 12.5 of [Sydsæter et al. 2008](#)). Then,  
 3433 the total selection gradient of controls at a given age is propor-  
 3434 tional to the semi-total effects of such controls on the Hamilto-  
 3435 nian when both gradients are evaluated at optimal controls:

$$\frac{dw}{d\mathbf{y}_a} \Big|_{\mathbf{y}=\bar{\mathbf{y}}=\mathbf{y}^*} = \frac{1}{T} \frac{\delta H_a}{\delta\mathbf{y}_a} \Big|_{\mathbf{y}=\bar{\mathbf{y}}=\mathbf{y}^*} = \mathbf{0}.$$

### 3436 Appendix 14: matrix calculus notation

3437 For vectors  $\mathbf{a} \in \mathbb{R}^{n \times 1}$  and  $\mathbf{b} \in \mathbb{R}^{m \times 1}$ , we denote

$$\frac{\partial \mathbf{a}}{\partial \mathbf{b}^\top} = \begin{pmatrix} \frac{\partial a_1}{\partial b_1} & \cdots & \frac{\partial a_1}{\partial b_m} \\ \vdots & \ddots & \vdots \\ \frac{\partial a_n}{\partial b_1} & \cdots & \frac{\partial a_n}{\partial b_m} \end{pmatrix} \in \mathbb{R}^{n \times m},$$

3438 so  $(\partial \mathbf{a} / \partial \mathbf{b}^\top)^\top = \partial \mathbf{a}^\top / \partial \mathbf{b}$ .

### Appendix 15: matrix of socio-devo stability

To see why the matrix

$$\frac{d\mathbf{x}}{d\bar{\mathbf{x}}^\top} \Big|_{\mathbf{y}=\bar{\mathbf{y}}}$$

3441 is sufficient to determine socio-devo stability, consider the fol-  
 3442 lowing. Let  $\bar{\mathbf{x}}(\theta + 1) = \bar{\mathbf{g}}(\bar{\mathbf{x}}(\theta))$  denote the solution of iterating  
 3443 Eq. (4) over  $a$ , where we highlight only the argument corre-  
 3444 sponding to the states of social partners. An equilibrium  $\bar{\mathbf{x}}^{**}$   
 3445 of the socio-devo stabilization dynamics satisfies  $\bar{\mathbf{x}}^{**} = \bar{\mathbf{g}}(\bar{\mathbf{x}}^{**})$ .  
 3446 Taylor-expanding  $\bar{\mathbf{x}}(\theta + 1)$  to first-order around  $\bar{\mathbf{x}}^{**}$ , we have

$$\bar{\mathbf{x}}(\theta + 1) = \bar{\mathbf{g}}(\bar{\mathbf{x}}^{**}) + \frac{d\bar{\mathbf{g}}}{d\bar{\mathbf{x}}^\top} \Big|_{\bar{\mathbf{x}}=\bar{\mathbf{x}}^{**}} (\bar{\mathbf{x}}(\theta) - \bar{\mathbf{x}}^{**}) + O(\|\bar{\mathbf{x}}(\theta) - \bar{\mathbf{x}}^{**}\|^2),$$

3447 where the operator  $d/d\bar{\mathbf{x}}^\top$  takes the total derivative to take into  
 3448 account developmental and environmental constraints. Noting  
 3449 that  $d\bar{\mathbf{g}}/d\bar{\mathbf{x}}^\top|_{\bar{\mathbf{x}}=\bar{\mathbf{x}}^{**}} = d\mathbf{x}/d\bar{\mathbf{x}}^\top|_{\mathbf{y}=\bar{\mathbf{y}}}$  since the resident is a socio-  
 3450 devo equilibrium, we have that a perturbation from a socio-devo  
 3451 equilibrium is approximately

$$\bar{\mathbf{x}}(\theta + 1) - \bar{\mathbf{g}}(\bar{\mathbf{x}}^{**}) \approx \frac{d\mathbf{x}}{d\bar{\mathbf{x}}^\top} \Big|_{\mathbf{y}=\bar{\mathbf{y}}} (\bar{\mathbf{x}}(\theta) - \bar{\mathbf{x}}^{**}),$$

3452 which asymptotically converges to  $\mathbf{0}$  (i.e.,  $\bar{\mathbf{x}}^{**}$  is locally stable) if  
 3453 all the eigenvalues of the matrix

$$\frac{d\mathbf{x}}{d\bar{\mathbf{x}}^\top} \Big|_{\mathbf{y}=\bar{\mathbf{y}}}$$

3454 have absolute value strictly less than one.

### Appendix 16: Total and semi-total derivatives

3455 Consider a function  $f(a, \mathbf{b}, \mathbf{c}) \in \mathbb{R}$  where the vectors  $\mathbf{b} \in \mathbb{R}^{n \times 1}$   
 3456 and  $\mathbf{c} \in \mathbb{R}^{m \times 1}$  satisfy the (equality) constraints

$$\begin{aligned} \mathbf{b} &= \mathbf{d}(a) \\ \mathbf{c} &= \mathbf{e}(a), \end{aligned}$$

3457 for some differentiable functions  $\mathbf{d}(a) \in \mathbb{R}^{n \times 1}$  and  $\mathbf{e}(a) \in \mathbb{R}^{m \times 1}$ .  
 3458 From the chain rule, the total derivative of  $f(a, \mathbf{b}, \mathbf{c})$  with respect  
 3459 to  $a$  is  
 3460

$$\begin{aligned} \frac{df}{da} &= \frac{df(a, \mathbf{d}(a), \mathbf{e}(a))}{da} = \frac{\partial f}{\partial a} + \sum_{i=1}^n \frac{\partial f}{\partial b_i} \frac{db_i}{da} + \sum_{i=1}^m \frac{\partial f}{\partial c_i} \frac{dc_i}{da} \\ &= \frac{\partial f}{\partial a} + \frac{\partial f}{\partial \mathbf{b}^\top} \frac{d\mathbf{b}}{da} + \frac{\partial f}{\partial \mathbf{c}^\top} \frac{d\mathbf{c}}{da}. \end{aligned}$$

3461 We call the semi-total derivative of  $f(a, \mathbf{b}, \mathbf{c})$  with respect to  $a$ ,  
 3462 considering the constraints on  $\mathbf{b}$  without considering the con-  
 3463 straints on  $\mathbf{c}$ , the quantity

$$\frac{\delta f}{\delta a} = \frac{df(a, \mathbf{d}(a), \mathbf{c})}{da} = \frac{\partial f}{\partial a} + \frac{\partial f}{\partial \mathbf{b}^\top} \frac{d\mathbf{b}}{da}.$$

3464 We use "derivative-like" notation like this one for various differ-  
 3465 ential operators, motivated by some analogous use by [Caswell](#)  
 3466 (2019) (his Eqs. 1.2 and 2.21, which he based on a suggestion by  
 3467 [Samuelson 1947](#)).

3468 **Appendix 17: Selection response and genetic lines of**  
3469 **least resistance**

3470 Lande's equation ( $\Delta\bar{z} = \mathbf{G}\beta$ ) describes evolutionary change  
3471 in terms of the direction of selection ( $\beta$ ) modified by genetic  
3472 covariation ( $\mathbf{G}$ ). Evolutionary change is thus thought to occur  
3473 along "genetic lines of least resistance" (Schluter 1996), that is,  
3474 on trajectories that are parallel to a leading eigenvector of  $\mathbf{G}$ . We  
3475 now show that selection response occurs along genetic lines of  
3476 least resistance if only one control at one age evolves (it might  
3477 also be the case when an arbitrary number of controls evolve at  
3478 an arbitrary number of ages, but we do not prove it).

3479 Recall that selection response of the phenotype is  
3480  $\mathbf{H}_z \delta w / \delta z|_{y=\bar{y}}$ , which reduces to Lande's equation  $\mathbf{G}_z \partial w / \partial z|_{y=\bar{y}}$   
3481 if there are no exogenous environmental effects on states, no  
3482 social development, and no niche construction. We now charac-  
3483 terize the eigensystem of  $\mathbf{H}_z$ , and thus the eigensystem of  $\mathbf{G}_z$  as  
3484 a particular case. The eigenvalues  $\rho$  and eigenvectors  $\mathbf{q}$  of  $\mathbf{H}_z$   
3485 are given by the equation

$$\mathbf{H}_z \mathbf{q} = \rho \mathbf{q}. \quad (\text{A97})$$

3486 Using Eq. (83), this is

$$\left( \begin{array}{cc} \frac{\mathbf{s}\mathbf{x}}{\mathbf{s}\mathbf{y}^\top} \mathbf{G}_y \frac{d\mathbf{x}^\top}{dy} & \frac{\mathbf{s}\mathbf{x}}{\mathbf{s}\mathbf{y}^\top} \mathbf{G}_y \\ \mathbf{G}_y \frac{d\mathbf{x}^\top}{dy} & \mathbf{G}_y \end{array} \right) \Bigg|_{y=\bar{y}} \begin{pmatrix} \mathbf{q}_x \\ \mathbf{q}_y \end{pmatrix} = \rho \begin{pmatrix} \mathbf{q}_x \\ \mathbf{q}_y \end{pmatrix},$$

3487 for some vectors  $\mathbf{q}_x \in \mathbb{R}^{N_s N_s}$  and  $\mathbf{q}_y \in \mathbb{R}^{N_a N_c}$ . Doing the matrix  
3488 multiplication yields the two equations

$$\left( \frac{\mathbf{s}\mathbf{x}}{\mathbf{s}\mathbf{y}^\top} \mathbf{G}_y \frac{d\mathbf{x}^\top}{dy} \mathbf{q}_x + \frac{\mathbf{s}\mathbf{x}}{\mathbf{s}\mathbf{y}^\top} \mathbf{G}_y \mathbf{q}_y \right) \Bigg|_{y=\bar{y}} = \rho \mathbf{q}_x \quad (\text{A98a})$$

$$\left( \mathbf{G}_y \frac{d\mathbf{x}^\top}{dy} \mathbf{q}_x + \mathbf{G}_y \mathbf{q}_y \right) \Bigg|_{y=\bar{y}} = \rho \mathbf{q}_y. \quad (\text{A98b})$$

3489 Collecting for  $\mathbf{q}_y$  in Eq. (A98b) yields

$$\mathbf{G}_y \frac{d\mathbf{x}^\top}{dy} \Bigg|_{y=\bar{y}} \mathbf{q}_x = (\rho \mathbf{I} - \mathbf{G}_y) \mathbf{q}_y,$$

3490 which substituted in Eq. (A98a) yields

$$\left( \frac{\mathbf{s}\mathbf{x}}{\mathbf{s}\mathbf{y}^\top} (\rho \mathbf{I} - \mathbf{G}_y) \mathbf{q}_y + \frac{\mathbf{s}\mathbf{x}}{\mathbf{s}\mathbf{y}^\top} \mathbf{G}_y \mathbf{q}_y \right) \Bigg|_{y=\bar{y}} = \rho \mathbf{q}_x.$$

3491 Factorizing the left-hand side and simplifying yields

$$\rho \frac{\mathbf{s}\mathbf{x}}{\mathbf{s}\mathbf{y}^\top} \Bigg|_{y=\bar{y}} \mathbf{q}_y = \rho \mathbf{q}_x.$$

3492 Then, for any non-trivial eigenvector  $\mathbf{q} = (\mathbf{q}_x; \mathbf{q}_y)$  of  $\mathbf{H}_z$ , that is,  
3493 one whose eigenvalue is  $\rho \neq 0$ , we have

$$\frac{\mathbf{s}\mathbf{x}}{\mathbf{s}\mathbf{y}^\top} \Bigg|_{y=\bar{y}} \mathbf{q}_y = \mathbf{q}_x, \quad (\text{A99})$$

3494 which substituted in Eq. (A98b) yields

$$\left( \mathbf{G}_y \frac{d\mathbf{x}^\top}{dy} \frac{\mathbf{s}\mathbf{x}}{\mathbf{s}\mathbf{y}^\top} \mathbf{q}_y + \mathbf{G}_y \mathbf{q}_y \right) \Bigg|_{y=\bar{y}} = \rho \mathbf{q}_y,$$

3495 and factorizing the left-hand side we obtain

$$\mathbf{G}_y \left( \frac{d\mathbf{x}^\top}{dy} \frac{\mathbf{s}\mathbf{x}}{\mathbf{s}\mathbf{y}^\top} + \mathbf{I} \right) \Bigg|_{y=\bar{y}} \mathbf{q}_y = \rho \mathbf{q}_y.$$

Therefore, from Eq. (A99), we have that any non-trivial eigen- 3496  
vector of  $\mathbf{H}_z$  is given by 3497

$$\mathbf{q} = \begin{pmatrix} \frac{\mathbf{s}\mathbf{x}}{\mathbf{s}\mathbf{y}^\top} \Big|_{y=\bar{y}} \\ \mathbf{I} \end{pmatrix} \mathbf{q}_y = \frac{\mathbf{s}\mathbf{z}}{\mathbf{s}\mathbf{y}^\top} \Bigg|_{y=\bar{y}} \mathbf{q}_y, \quad (\text{A100})$$

where  $\mathbf{q}_y$  is a non-trivial eigenvector of  $\mathbf{G}_y \left( \frac{d\mathbf{x}^\top}{dy} \frac{\mathbf{s}\mathbf{x}}{\mathbf{s}\mathbf{y}^\top} + \mathbf{I} \right) \Bigg|_{y=\bar{y}}$ . 3498

Eq. (A100) shows that the matrix  $\mathbf{s}\mathbf{z}/\mathbf{s}\mathbf{y}^\top|_{y=\bar{y}}$  transforms any 3499  
such non-trivial eigenvector in control space into a non-trivial 3500  
eigenvector of  $\mathbf{H}_z$ . 3501

Now, recall that we have that selection response of the phe- 3502  
notype is 3503

$$\mathbf{H}_z \frac{\delta w}{\delta z} \Bigg|_{y=\bar{y}} = \mathbf{H}_{z_y} \frac{dw}{dy} \Bigg|_{y=\bar{y}} = \left( \frac{\mathbf{s}\mathbf{z}}{\mathbf{s}\mathbf{y}^\top} \mathbf{G}_y \frac{dw}{dy} \right) \Bigg|_{y=\bar{y}}.$$

Hence, from Eq. (A100) we have that selection response 3504  
of the phenotype is a non-trivial eigenvector of  $\mathbf{H}_z$  if 3505

and only if  $\mathbf{G}_y \frac{dw}{dy} \Bigg|_{y=\bar{y}}$  is a non-trivial eigenvector of 3506

$\mathbf{G}_y \left( \frac{d\mathbf{x}^\top}{dy} \frac{\mathbf{s}\mathbf{x}}{\mathbf{s}\mathbf{y}^\top} + \mathbf{I} \right) \Bigg|_{y=\bar{y}}$ . In particular, if there is a single control 3507

( $N_c = 1$ ) and it evolves at a single age, the matrix 3508

$\mathbf{G}_y \left( \frac{d\mathbf{x}^\top}{dy} \frac{\mathbf{s}\mathbf{x}}{\mathbf{s}\mathbf{y}^\top} + \mathbf{I} \right) \Bigg|_{y=\bar{y}}$  is effectively a scalar and selection-led- 3509

evolution is necessarily a non-trivial and leading eigenvector 3510

of  $\mathbf{H}_z$ ; that is, with a single control evolving at a single age, se- 3511

lection response of the phenotype occurs along genetic lines of 3512

least resistance. 3513
